# Supplementary material for: Transcriptome analysis of colored calla lily (Zantedeschia rehmannii Engl.) by Illumina sequencing: de novo assembly, annotation and EST-SSR marker development
Source: PeerJ. 2016 Sep 1;4:e2378. doi: 10.7717/peerj.2378 (PMC5012260; doi:10.7717/peerj.2378)
Supplement: Table S2 [file peerj-04-2378-s003.xlsx]

## Sheet: Sheet1
Table S3 Integrated function annotation and classification for colored calla lily ‘Rehmannii’ unigenes
#GeneID	COG_class	COG_class_annotation	GO_annotation	KEGG_annotation	Swissprot_annotation	nr_annotation
comp26077_c0	--	--	Molecular Function: nucleic acid binding (GO:0003676);;	--	Retrovirus-related Pol polyprotein LINE-1 OS=Mus musculus GN=Pol PE=1 SV=2	hypothetical protein [Beta vulgaris subsp. vulgaris]
comp29096_c0	--	--	--	--	--	hypothetical protein OsI_33174 [Oryza sativa Indica Group]
comp28996_c0	--	--	--	--	Putative protein TPRXL OS=Homo sapiens GN=TPRXL PE=5 SV=2	hypothetical protein PRUPE_ppa012076mg [Prunus persica]
comp31595_c0	--	--	--	--	--	Uncharacterized protein TCM_016762 [Theobroma cacao]
comp20969_c0	[KL]	--	Molecular Function: DNA binding (GO:0003677);; Molecular Function: helicase activity (GO:0004386);; Molecular Function: ATP binding (GO:0005524);; Cellular Component: nucleus (GO:0005634);; Biological Process: mitosis (GO:0007067);; Biological Process: synapsis (GO:0007129);; Biological Process: reciprocal meiotic recombination (GO:0007131);; Biological Process: male meiosis (GO:0007140);; Biolog…	K10875|0.0|vvi:100246859|hypothetical protein LOC100246859	DNA repair and recombination protein RAD54 OS=Oryza sativa subsp. japonica GN=RAD54 PE=1 SV=1	hypothetical protein VITISV_021223 [Vitis vinifera]
comp15683_c0	--	--	--	--	--	PREDICTED: uncharacterized protein LOC101770373 [Setaria italica]
comp1434_c0	--	--	Cellular Component: plasma membrane (GO:0005886);; Biological Process: virus induced gene silencing (GO:0009616);; Biological Process: vegetative phase change (GO:0010050);; Molecular Function: transition metal ion binding (GO:0046914);; Biological Process: cellular transition metal ion homeostasis (GO:0046916);;	--	Basic proline-rich protein OS=Sus scrofa PE=1 SV=2	PREDICTED: uncharacterized protein LOC101297429 [Fragaria vesca subsp. vesca]
comp18154_c0	--	--	--	--	--	hypothetical protein VITISV_020585 [Vitis vinifera]
comp3303_c0	[J]	Translation, ribosomal structure and biogenesis	Biological Process: regulation of transcription, DNA-templated (GO:0006355);; Biological Process: cellular response to stimulus (GO:0051716);;	--	Transcription factor TCP7 OS=Arabidopsis thaliana GN=TCP7 PE=2 SV=1	PREDICTED: transcription factor TCP7-like [Vitis vinifera]
comp19395_c0	--	--	Cellular Component: origin recognition complex (GO:0000808);; Molecular Function: protein binding (GO:0005515);; Molecular Function: ATP binding (GO:0005524);; Cellular Component: nucleus (GO:0005634);; Biological Process: DNA replication (GO:0006260);; Biological Process: regulation of transcription, DNA-templated (GO:0006355);; Molecular Function: zinc ion binding (GO:0008270);; Biological Proc…	K02603|3e-61|rcu:RCOM_1577650|origin recognition complex subunit, putative	Origin recognition complex subunit 1 OS=Cricetulus griseus GN=ORC1 PE=2 SV=1	PREDICTED: origin recognition complex subunit 1-like, partial [Cucumis sativus]
comp8746_c0	--	--	--	--	SCAR-like protein 2 OS=Oryza sativa subsp. japonica GN=Os01g0208600 PE=2 SV=1	PREDICTED: SCAR-like protein 2-like [Brachypodium distachyon]
comp1967_c0	[I]	Lipid transport and metabolism	Molecular Function: acetyl-CoA carboxylase activity (GO:0003989);; Molecular Function: ATP binding (GO:0005524);; Biological Process: fatty acid biosynthetic process (GO:0006633);; Molecular Function: zinc ion binding (GO:0008270);; Cellular Component: acetyl-CoA carboxylase complex (GO:0009317);; Cellular Component: chloroplast stroma (GO:0009570);; Molecular Function: transferase activity (GO:0…	--	Acetyl-coenzyme A carboxylase carboxyl transferase subunit beta, chloroplastic OS=Cicer arietinum GN=accD PE=3 SV=1	acetyl-CoA carboxylase beta subunit (chloroplast) [Cordyline australis]
comp24303_c0	[RTKL]	--	Cellular Component: plasma membrane (GO:0005886);; Molecular Function: kinase activity (GO:0016301);;	--	Putative receptor-like protein kinase At1g80870 OS=Arabidopsis thaliana GN=At1g80870 PE=1 SV=1	Kinase superfamily protein [Theobroma cacao]
comp12355_c0	--	--	--	--	Probable E3 ubiquitin ligase SUD1 OS=Arabidopsis thaliana GN=SUD1 PE=1 SV=1	PREDICTED: uncharacterized protein LOC100257089 [Vitis vinifera]
comp6893_c0	--	--	Cellular Component: plastid (GO:0009536);;	--	--	hypothetical protein OsJ_04241 [Oryza sativa Japonica Group]
comp12908_c0	--	--	Molecular Function: nucleotide binding (GO:0000166);; Molecular Function: 3-beta-hydroxy-delta5-steroid dehydrogenase activity (GO:0003854);; Cellular Component: nucleus (GO:0005634);; Biological Process: steroid biosynthetic process (GO:0006694);; Biological Process: response to sucrose (GO:0009744);; Biological Process: lignin biosynthetic process (GO:0009809);; Biological Process: flavonoid bi…	--	--	predicted protein [Populus trichocarpa]
comp9662_c0	[IQR]	--	Molecular Function: nucleotide binding (GO:0000166);; Molecular Function: protochlorophyllide reductase activity (GO:0016630);; Biological Process: oxidation-reduction process (GO:0055114);;	--	Dehydrogenase/reductase SDR family member 12 OS=Bos taurus GN=DHRS12 PE=2 SV=1	putative short chain dehydrogenase/reductase [Oryza sativa Japonica Group]
comp18606_c0	[J]	Translation, ribosomal structure and biogenesis	Molecular Function: copper ion binding (GO:0005507);; Cellular Component: mitochondrion (GO:0005739);;	--	Translation initiation factor IF-2 OS=Mycobacterium gilvum (strain PYR-GCK) GN=infB PE=3 SV=1	Copper ion binding isoform 1 [Theobroma cacao]
comp10379_c0	--	--	--	--	E3 ubiquitin-protein ligase PRT1 OS=Arabidopsis thaliana GN=PRT1 PE=2 SV=2	PREDICTED: E3 ubiquitin-protein ligase PRT1-like isoform 2 [Brachypodium distachyon]
comp29192_c0	--	--	Cellular Component: plastid (GO:0009536);; Biological Process: single-organism process (GO:0044699);;	--	--	PREDICTED: uncharacterized protein LOC100256072 [Vitis vinifera]
comp15290_c0	[TZDR]	--	Molecular Function: calcium ion binding (GO:0005509);; Cellular Component: mitochondrion (GO:0005739);;	K13448|1e-60|sbi:SORBI_03g045770|hypothetical protein	Probable calcium-binding protein CML10 OS=Oryza sativa subsp. japonica GN=CML10 PE=2 SV=1	polcalcin Jun o 2 [Zea mays]
comp3901_c0	--	--	Biological Process: maltose metabolic process (GO:0000023);; Biological Process: MAPK cascade (GO:0000165);; Cellular Component: nucleus (GO:0005634);; Biological Process: regulation of transcription, DNA-templated (GO:0006355);; Biological Process: protein targeting to membrane (GO:0006612);; Molecular Function: zinc ion binding (GO:0008270);; Biological Process: response to bacterium (GO:000961…	--	--	RING/FYVE/PHD zinc finger superfamily protein isoform 1 [Theobroma cacao]
comp4761_c0	[J]	Translation, ribosomal structure and biogenesis	Cellular Component: plastid large ribosomal subunit (GO:0000311);; Molecular Function: structural constituent of ribosome (GO:0003735);; Biological Process: translation (GO:0006412);; Cellular Component: chloroplast stroma (GO:0009570);; Cellular Component: chloroplast envelope (GO:0009941);; Biological Process: isopentenyl diphosphate biosynthetic process, methylerythritol 4-phosphate pathway (G…	K02939|1e-80|vvi:100251697|hypothetical protein LOC100251697	50S ribosomal protein L9, chloroplastic OS=Arabidopsis thaliana GN=RPL9 PE=2 SV=1	PREDICTED: 50S ribosomal protein L9, chloroplastic [Vitis vinifera]
comp37187_c0	--	--	Cellular Component: mitochondrion (GO:0005739);; Cellular Component: plastid (GO:0009536);;	--	Pentatricopeptide repeat-containing protein At1g03560, mitochondrial OS=Arabidopsis thaliana GN=At1g03560 PE=2 SV=1	pentatricopeptide repeat-containing protein, putative [Ricinus communis]
comp32541_c0	--	--	--	--	Putative protein TPRXL OS=Homo sapiens GN=TPRXL PE=5 SV=2	PREDICTED: uncharacterized protein LOC101232479 [Cucumis sativus]
comp8620_c0	--	--	Cellular Component: extracellular region (GO:0005576);; Cellular Component: cell wall (GO:0005618);; Biological Process: glucuronoxylan metabolic process (GO:0010413);; Molecular Function: endo-1,4-beta-xylanase activity (GO:0031176);; Biological Process: xylan biosynthetic process (GO:0045492);;	--	Endo-1,4-beta-xylanase A OS=Thermoanaerobacter saccharolyticum GN=xynA PE=1 SV=1	predicted protein [Populus trichocarpa]
comp11803_c0	--	--	--	--	--	T4.15 [Malus x robusta]
comp8277_c0	--	--	Molecular Function: zinc ion binding (GO:0008270);;	--	--	RING finger protein [Medicago truncatula]
comp9109_c0	--	--	Biological Process: metabolic process (GO:0008152);; Molecular Function: 1,2-alpha-L-fucosidase activity (GO:0047513);;	--	Alpha-L-fucosidase 2 OS=Arabidopsis thaliana GN=At4g34260 PE=2 SV=1	alpha-1,2-fucosidase [Lilium longiflorum]
comp10789_c0	--	--	Molecular Function: nucleic acid binding (GO:0003676);; Molecular Function: protein serine/threonine kinase activity (GO:0004674);; Molecular Function: ATP binding (GO:0005524);; Cellular Component: plasma membrane (GO:0005886);; Biological Process: protein phosphorylation (GO:0006468);; Molecular Function: zinc ion binding (GO:0008270);;	--	Probable LRR receptor-like serine/threonine-protein kinase At1g53430 OS=Arabidopsis thaliana GN=At1g53430 PE=1 SV=1	predicted protein [Populus trichocarpa]
comp15194_c0	--	--	Biological Process: fatty acid metabolic process (GO:0006631);; Molecular Function: acyl-[acyl-carrier-protein] desaturase activity (GO:0045300);; Molecular Function: transition metal ion binding (GO:0046914);; Biological Process: oxidation-reduction process (GO:0055114);;	--	Acyl-[acyl-carrier-protein] desaturase, chloroplastic OS=Simmondsia chinensis PE=2 SV=1	PREDICTED: acyl-[acyl-carrier-protein] desaturase, chloroplastic-like [Solanum lycopersicum]
comp33194_c0	--	--	Biological Process: microtubule cytoskeleton organization (GO:0000226);; Biological Process: protein folding (GO:0006457);; Biological Process: response to heat (GO:0009408);; Biological Process: response to high light intensity (GO:0009644);; Molecular Function: transferase activity, transferring glycosyl groups (GO:0016757);; Biological Process: response to endoplasmic reticulum stress (GO:0034…	K03849|3e-56|ath:AT2G44660|transferase, transferring glycosyl groups / transferase, transferring hexosyl groups	Probable dolichyl pyrophosphate Glc1Man9GlcNAc2 alpha-1,3-glucosyltransferase OS=Arabidopsis thaliana GN=At2g44660 PE=2 SV=3	hypothetical protein CARUB_v10023047mg [Capsella rubella]
comp10499_c0	[E]	Amino acid transport and metabolism	Molecular Function: glycine hydroxymethyltransferase activity (GO:0004372);; Biological Process: glycine metabolic process (GO:0006544);; Biological Process: L-serine metabolic process (GO:0006563);; Molecular Function: methyltransferase activity (GO:0008168);; Molecular Function: electron carrier activity (GO:0009055);; Molecular Function: heme binding (GO:0020037);; Molecular Function: pyridoxa…	K00600|1e-45|sbi:SORBI_03g041410|hypothetical protein	Serine hydroxymethyltransferase 7 OS=Arabidopsis thaliana GN=SHM7 PE=2 SV=1	hypothetical protein ZEAMMB73_757872 [Zea mays]
comp39576_c0	[L]	Replication, recombination and repair	Biological Process: macromolecule metabolic process (GO:0043170);; Biological Process: primary metabolic process (GO:0044238);;	--	Retrotransposable element Tf2 155 kDa protein type 3 OS=Schizosaccharomyces pombe (strain 972 / ATCC 24843) GN=Tf2-11 PE=4 SV=1	PREDICTED: uncharacterized protein LOC101292670 [Fragaria vesca subsp. vesca]
comp8290_c0	--	--	Molecular Function: aminoacyl-tRNA hydrolase activity (GO:0004045);; Biological Process: translation (GO:0006412);; Biological Process: heme biosynthetic process (GO:0006783);; Cellular Component: plastid (GO:0009536);;	--	Peptidyl-tRNA hydrolase, mitochondrial OS=Arabidopsis thaliana GN=At5g19830 PE=2 SV=1	hypothetical protein PRUPE_ppa011211mg [Prunus persica]
comp9619_c0	[K]	Transcription	Molecular Function: copper ion transmembrane transporter activity (GO:0005375);; Cellular Component: intrinsic component of membrane (GO:0031224);; Biological Process: copper ion transmembrane transport (GO:0035434);;	K14686|7e-39|pop:POPTR_558005|copper transporter	Copper transporter 1 OS=Arabidopsis thaliana GN=COPT1 PE=2 SV=2	copper transporter [Populus trichocarpa]
comp5708_c0	[R]	General function prediction only	Molecular Function: nucleotide binding (GO:0000166);; Biological Process: endonucleolytic cleavage involved in rRNA processing (GO:0000478);; Biological Process: RNA methylation (GO:0001510);; Cellular Component: nucleolus (GO:0005730);; Cellular Component: heterotrimeric G-protein complex (GO:0005834);; Biological Process: protein import into nucleus (GO:0006606);; Biological Process: protein ta…	--	Ribosome biogenesis protein WDR12 homolog OS=Chlamydomonas reinhardtii GN=CHLREDRAFT_128420 PE=1 SV=2	PREDICTED: ribosome biogenesis protein WDR12 homolog [Vitis vinifera]
comp6607_c0	[RTKL]	--	Biological Process: MAPK cascade (GO:0000165);; Molecular Function: protein serine/threonine kinase activity (GO:0004674);; Molecular Function: signal transducer activity (GO:0004871);; Biological Process: protein phosphorylation (GO:0006468);; Biological Process: regulation of cellular metabolic process (GO:0031323);; Biological Process: regulation of macromolecule metabolic process (GO:0060255)…	--	Serine/threonine-protein kinase EDR1 OS=Arabidopsis thaliana GN=EDR1 PE=1 SV=1	PREDICTED: uncharacterized protein LOC100256793 [Vitis vinifera]
comp12129_c0	--	--	Molecular Function: actin binding (GO:0003779);; Biological Process: fatty acid catabolic process (GO:0009062);; Cellular Component: actin cytoskeleton (GO:0015629);; Biological Process: actin cytoskeleton organization (GO:0030036);;	--	--	predicted protein [Hordeum vulgare subsp. vulgare]
comp1364_c0	[H]	Coenzyme transport and metabolism	Molecular Function: ferrochelatase activity (GO:0004325);; Cellular Component: mitochondrion (GO:0005739);; Biological Process: protein targeting to membrane (GO:0006612);; Biological Process: heme biosynthetic process (GO:0006783);; Biological Process: response to oxidative stress (GO:0006979);; Cellular Component: chloroplast (GO:0009507);; Biological Process: response to wounding (GO:0009611);…	K01772|0.0|rcu:RCOM_0798270|ferrochelatase, putative (EC:4.99.1.1)	Ferrochelatase-2, chloroplastic OS=Hordeum vulgare GN=HEMH PE=2 SV=1	ferrochelatase, putative [Ricinus communis]
comp23479_c0	[J]	Translation, ribosomal structure and biogenesis	--	--	Translation initiation factor IF-2 OS=Arthrobacter aurescens (strain TC1) GN=infB PE=3 SV=1	PREDICTED: uncharacterized protein LOC100798956 [Glycine max]
comp745_c0	--	--	Molecular Function: structural constituent of ribosome (GO:0003735);; Cellular Component: ribosome (GO:0005840);; Biological Process: translation (GO:0006412);;	K02995|2e-14|sbi:SORBI_04g028530|hypothetical protein	40S ribosomal protein S8 OS=Oryza sativa subsp. japonica GN=RPS8 PE=2 SV=2	40S ribosomal protein S8 [Oryza sativa Indica Group]
comp8635_c0	--	--	--	--	LisH domain-containing protein C1711.05 OS=Schizosaccharomyces pombe (strain 972 / ATCC 24843) GN=SPBC1711.05 PE=4 SV=1	Uncharacterized protein isoform 1 [Theobroma cacao]
comp17323_c0	--	--	Cellular Component: mitochondrion (GO:0005739);;	--	Pentatricopeptide repeat-containing protein At1g80150, mitochondrial OS=Arabidopsis thaliana GN=At1g80150 PE=2 SV=2	pentatricopeptide repeat-containing protein, putative [Ricinus communis]
comp17008_c0	[F]	Nucleotide transport and metabolism	Cellular Component: mitochondrion (GO:0005739);; Biological Process: 'de novo' IMP biosynthetic process (GO:0006189);; Molecular Function: formyltetrahydrofolate deformylase activity (GO:0008864);; Biological Process: photorespiration (GO:0009853);; Molecular Function: hydroxymethyl-, formyl- and related transferase activity (GO:0016742);; Biological Process: tetrahydrofolate metabolic process (G…	K01433|1e-163|sbi:SORBI_01g050510|hypothetical protein	Formyltetrahydrofolate deformylase OS=Bacillus subtilis (strain 168) GN=purU PE=3 SV=2	Formyltetrahydrofolate deformylase isoform 1 [Theobroma cacao]
comp7660_c0	--	--	Biological Process: cell morphogenesis (GO:0000902);; Biological Process: extracellular transport (GO:0006858);; Biological Process: endocytosis (GO:0006897);; Cellular Component: membrane (GO:0016020);; Biological Process: cell growth (GO:0016049);; Molecular Function: ATPase activity, coupled to transmembrane movement of substances (GO:0042626);; Biological Process: Golgi vesicle transport (GO:…	--	Uncharacterized protein At1g03900 OS=Arabidopsis thaliana GN=At1g03900 PE=2 SV=1	Adaptin ear-binding coat-associated protein, putative [Ricinus communis]
comp13206_c0	--	--	--	--	--	PREDICTED: uncharacterized protein At2g29880-like [Glycine max]
comp3535_c0	[P]	Inorganic ion transport and metabolism	Molecular Function: calcium-transporting ATPase activity (GO:0005388);; Molecular Function: ATP binding (GO:0005524);; Cellular Component: nucleus (GO:0005634);; Cellular Component: endoplasmic reticulum (GO:0005783);; Cellular Component: plasma membrane (GO:0005886);; Biological Process: ATP catabolic process (GO:0006200);; Biological Process: cation transport (GO:0006812);; Biological Process: …	K01552|0.0|vvi:100257916|hypothetical protein LOC100257916	Probable cation-transporting ATPase OS=Arabidopsis thaliana GN=At5g23630 PE=2 SV=1	PREDICTED: probable cation-transporting ATPase-like isoform 2 [Vitis vinifera]
comp4096_c0	--	--	Cellular Component: nucleus (GO:0005634);;	--	Transcription factor bHLH121 OS=Arabidopsis thaliana GN=BHLH121 PE=2 SV=1	PREDICTED: transcription factor bHLH121-like [Cucumis sativus]
comp7949_c0	--	--	Cellular Component: membrane (GO:0016020);; Biological Process: metal ion transport (GO:0030001);; Molecular Function: metal ion transmembrane transporter activity (GO:0046873);;	--	Magnesium transporter MRS2-F OS=Oryza sativa subsp. japonica GN=MRS2-F PE=1 SV=1	predicted protein [Hordeum vulgare subsp. vulgare]
comp8418_c0	--	--	Biological Process: regulation of gene expression (GO:0010468);; Biological Process: regulation of primary metabolic process (GO:0080090);; Biological Process: nucleic acid metabolic process (GO:0090304);; Biological Process: regulation of cellular macromolecule biosynthetic process (GO:2000112);;	K13211|0.0|vvi:100245730|hypothetical protein LOC100245730	PAX3- and PAX7-binding protein 1 OS=Homo sapiens GN=PAXBP1 PE=1 SV=2	PREDICTED: GC-rich sequence DNA-binding factor 1-like [Cucumis sativus]
comp10455_c0	--	--	--	--	Protein PHLOEM PROTEIN 2-LIKE A10 OS=Arabidopsis thaliana GN=PP2A10 PE=2 SV=1	PREDICTED: protein PHLOEM PROTEIN 2-LIKE A10-like [Fragaria vesca subsp. vesca]
comp14831_c0	--	--	Molecular Function: catalytic activity (GO:0003824);;	--	Uncharacterized protein LOC284861 OS=Homo sapiens PE=2 SV=1	hypothetical protein CERSUDRAFT_115801 [Ceriporiopsis subvermispora B]
comp32126_c0	[L]	Replication, recombination and repair	Molecular Function: RNA binding (GO:0003723);; Molecular Function: RNA-directed DNA polymerase activity (GO:0003964);; Molecular Function: RNA-DNA hybrid ribonuclease activity (GO:0004523);; Biological Process: RNA-dependent DNA replication (GO:0006278);; Biological Process: DNA integration (GO:0015074);;	--	Transposon Ty3-G Gag-Pol polyprotein OS=Saccharomyces cerevisiae (strain ATCC 204508 / S288c) GN=TY3B-G PE=1 SV=3	PREDICTED: uncharacterized protein LOC100854167 [Vitis vinifera]
comp45096_c0	--	--	Molecular Function: transferase activity, transferring phosphorus-containing groups (GO:0016772);;	--	Proline-rich receptor-like protein kinase PERK2 OS=Arabidopsis thaliana GN=PERK2 PE=2 SV=3	hypothetical protein EDEG_00328 [Edhazardia aedis USNM 41457]
comp11623_c0	--	--	Biological Process: DNA recombination (GO:0006310);; Biological Process: meiosis (GO:0007126);; Biological Process: response to stimulus (GO:0050896);; Biological Process: chromosome organization (GO:0051276);;	--	Kinetochore protein spc25 OS=Schizosaccharomyces pombe (strain 972 / ATCC 24843) GN=spc25 PE=1 SV=1	unnamed protein product [Vitis vinifera]
comp10270_c0	--	--	Molecular Function: transferase activity, transferring glycosyl groups (GO:0016757);;	--	Flavanone 7-O-glucoside 2&apos;&apos;-O-beta-L-rhamnosyltransferase OS=Citrus maxima GN=C12RT1 PE=1 SV=2	PREDICTED: flavanone 7-O-glucoside 2&apos;&apos;-O-beta-L-rhamnosyltransferase-like [Vitis vinifera]
comp30652_c0	--	--	Molecular Function: binding (GO:0005488);;	--	--	hypothetical protein VITISV_020585 [Vitis vinifera]
comp24724_c0	--	--	Molecular Function: nucleotide binding (GO:0000166);; Biological Process: metabolic process (GO:0008152);; Cellular Component: membrane (GO:0016020);; Molecular Function: ATPase activity (GO:0016887);;	--	ABC transporter G family member 12 OS=Arabidopsis thaliana GN=ABCG12 PE=1 SV=1	hypothetical protein PRUPE_ppa002358m2g, partial [Prunus persica]
comp10088_c0	--	--	Molecular Function: protein serine/threonine kinase activity (GO:0004674);; Molecular Function: ATP binding (GO:0005524);; Biological Process: protein phosphorylation (GO:0006468);; Biological Process: recognition of pollen (GO:0048544);;	--	G-type lectin S-receptor-like serine/threonine-protein kinase At1g34300 OS=Arabidopsis thaliana GN=At1g34300 PE=1 SV=1	PREDICTED: G-type lectin S-receptor-like serine/threonine-protein kinase At1g34300-like [Glycine max]
comp791_c0	--	--	Biological Process: mRNA splicing, via spliceosome (GO:0000398);; Biological Process: formation of translation preinitiation complex (GO:0001731);; Molecular Function: translation initiation factor activity (GO:0003743);; Cellular Component: cytosol (GO:0005829);; Cellular Component: eukaryotic translation initiation factor 3 complex (GO:0005852);; Cellular Component: plasma membrane (GO:0005886)…	K03250|0.0|zma:100284265|eukaryotic translation initiation factor 3 subunit 6	Eukaryotic translation initiation factor 3 subunit E OS=Nematostella vectensis GN=v1g163572 PE=3 SV=1	unknown [Picea sitchensis]
comp17794_c0	--	--	Cellular Component: Golgi apparatus (GO:0005794);; Cellular Component: chloroplast (GO:0009507);; Biological Process: polar nucleus fusion (GO:0010197);; Biological Process: pollen tube development (GO:0048868);;	--	--	PREDICTED: DUF246 domain-containing protein At1g04910-like [Brachypodium distachyon]
comp4446_c0	[TA]	--	Biological Process: cytokinesis (GO:0000910);; Cellular Component: nuclear envelope (GO:0005635);; Cellular Component: endoplasmic reticulum (GO:0005783);; Cellular Component: plasma membrane (GO:0005886);; Cellular Component: cell plate (GO:0009504);; Cellular Component: chloroplast (GO:0009507);; Biological Process: response to salt stress (GO:0009651);; Cellular Component: cell division site (…	K14319|0.0|vvi:100244330|hypothetical protein LOC100244330	RAN GTPase-activating protein 2 OS=Arabidopsis thaliana GN=RANGAP2 PE=1 SV=2	PREDICTED: RAN GTPase-activating protein 1 isoform 2 [Vitis vinifera]
comp43621_c0	--	--	Molecular Function: nucleic acid binding (GO:0003676);; Molecular Function: catalytic activity (GO:0003824);; Biological Process: DNA metabolic process (GO:0006259);;	--	--	hypothetical protein VITISV_017628 [Vitis vinifera]
comp19324_c0	[L]	Replication, recombination and repair	Molecular Function: nucleic acid binding (GO:0003676);; Molecular Function: catalytic activity (GO:0003824);; Biological Process: DNA metabolic process (GO:0006259);;	--	Retrovirus-related Pol polyprotein from transposon 17.6 OS=Drosophila melanogaster GN=pol PE=4 SV=1	F5M15.26 [Arabidopsis thaliana]
comp2407_c0	--	--	Cellular Component: nucleus (GO:0005634);; Cellular Component: cytoplasm (GO:0005737);;	--	Diphthamide biosynthesis protein 3 OS=Saccharomyces cerevisiae (strain ATCC 204508 / S288c) GN=KTI11 PE=1 SV=1	hypothetical protein VITISV_009998 [Vitis vinifera]
comp5173_c0	--	--	Molecular Function: DNA binding (GO:0003677);; Biological Process: post-embryonic development (GO:0009791);; Cellular Component: cytoplasmic membrane-bounded vesicle (GO:0016023);; Molecular Function: protein dimerization activity (GO:0046983);;	--	Putative AC transposase OS=Zea mays PE=2 SV=2	hypothetical protein OsJ_19692 [Oryza sativa Japonica Group]
comp4830_c0	--	--	Molecular Function: nucleic acid binding (GO:0003676);; Molecular Function: histone acetyltransferase activity (GO:0004402);; Cellular Component: nucleus (GO:0005634);; Cellular Component: mitochondrion (GO:0005739);; Biological Process: DNA repair (GO:0006281);; Biological Process: regulation of transcription, DNA-templated (GO:0006355);; Molecular Function: zinc ion binding (GO:0008270);; Biolo…	K11308|0.0|osa:4343971|Os07g0626600	Putative MYST-like histone acetyltransferase 1 OS=Oryza sativa subsp. japonica GN=Os07g0626600 PE=2 SV=1	Os07g0626600 [Oryza sativa Japonica Group]
comp13188_c0	--	--	--	--	--	hypothetical protein OsI_04198 [Oryza sativa Indica Group]
comp10478_c0	[G]	Carbohydrate transport and metabolism	Cellular Component: mitochondrion (GO:0005739);; Cellular Component: chloroplast (GO:0009507);; Molecular Function: carbon-carbon lyase activity (GO:0016830);;	--	2-keto-3-deoxy-L-rhamnonate aldolase OS=Escherichia coli (strain SMS-3-5 / SECEC) GN=rhmA PE=3 SV=1	putative HpcH/HpaI aldolase/citrate lyase [Arachis duranensis]
comp10045_c1	[O]	Posttranslational modification, protein turnover, chaperones	Biological Process: MAPK cascade (GO:0000165);; Biological Process: protein peptidyl-prolyl isomerization (GO:0000413);; Molecular Function: peptidyl-prolyl cis-trans isomerase activity (GO:0003755);; Biological Process: pentose-phosphate shunt (GO:0006098);; Biological Process: rRNA processing (GO:0006364);; Biological Process: protein folding (GO:0006457);; Biological Process: protein targeting…	--	Peptidyl-prolyl cis-trans isomerase, chloroplastic OS=Spinacia oleracea GN=TLP40 PE=1 SV=1	hypothetical protein OsI_29072 [Oryza sativa Indica Group]
comp18746_c0	--	--	--	--	--	PREDICTED: uncharacterized protein LOC100260598 [Vitis vinifera]
comp39118_c0	--	--	Molecular Function: nucleic acid binding (GO:0003676);; Cellular Component: photosystem II (GO:0009523);; Biological Process: cellular metabolic process (GO:0044237);; Molecular Function: metal ion binding (GO:0046872);;	--	Retrovirus-related Pol polyprotein from transposon TNT 1-94 OS=Nicotiana tabacum PE=2 SV=1	retrotransposon protein, putative, unclassified [Oryza sativa Japonica Group]
comp6610_c0	[H]	Coenzyme transport and metabolism	Biological Process: sulfur amino acid metabolic process (GO:0000096);; Biological Process: glycine catabolic process (GO:0006546);; Biological Process: unsaturated fatty acid biosynthetic process (GO:0006636);; Biological Process: oxidoreduction coenzyme metabolic process (GO:0006733);; Biological Process: cellular amino acid biosynthetic process (GO:0008652);; Biological Process: aromatic amino …	K09833|0.0|vvi:100232967|HGGT	Probable homogentisate phytyltransferase 1, chloroplastic OS=Oryza sativa subsp. japonica GN=HPT1 PE=2 SV=1	hypothetical protein VITISV_043992 [Vitis vinifera]
comp4677_c0	--	--	Molecular Function: phosphorelay response regulator activity (GO:0000156);; Biological Process: phosphorelay signal transduction system (GO:0000160);; Cellular Component: mitochondrion (GO:0005739);; Biological Process: regulation of transcription, DNA-templated (GO:0006355);; Cellular Component: chloroplast inner membrane (GO:0009706);; Biological Process: intracellular signal transduction (GO:0…	--	--	PREDICTED: uncharacterized protein LOC100264910 [Vitis vinifera]
comp15157_c0	--	--	Cellular Component: integral component of membrane (GO:0016021);;	--	Amino acid permease 3 OS=Arabidopsis thaliana GN=AAP3 PE=1 SV=2	hypothetical protein SORBIDRAFT_09g020790 [Sorghum bicolor]
comp38717_c0	--	--	Biological Process: metabolic process (GO:0008152);;	K13148|4e-09|vvi:100261060|hypothetical protein LOC100261060	--	hypothetical protein VITISV_014358 [Vitis vinifera]
comp6665_c0	[E]	Amino acid transport and metabolism	Molecular Function: aminopeptidase activity (GO:0004177);; Cellular Component: cytosol (GO:0005829);; Biological Process: N-terminal protein myristoylation (GO:0006499);; Biological Process: proteolysis (GO:0006508);; Molecular Function: serine-type peptidase activity (GO:0008236);; Cellular Component: chloroplast (GO:0009507);;	--	Dipeptidyl peptidase family member 6 OS=Caenorhabditis elegans GN=dpf-6 PE=3 SV=2	predicted protein [Hordeum vulgare subsp. vulgare]
comp4979_c0	--	--	Cellular Component: integral component of plasma membrane (GO:0005887);; Biological Process: carbohydrate transport (GO:0008643);; Cellular Component: chloroplast (GO:0009507);; Molecular Function: sugar transmembrane transporter activity (GO:0051119);;	--	Bidirectional sugar transporter SWEET4 OS=Oryza sativa subsp. japonica GN=SWEET4 PE=2 SV=1	PREDICTED: bidirectional sugar transporter SWEET4-like [Setaria italica]
comp10686_c0	[O]	Posttranslational modification, protein turnover, chaperones	Cellular Component: intracellular (GO:0005622);; Biological Process: metabolic process (GO:0008152);; Molecular Function: oxidoreductase activity (GO:0016491);; Molecular Function: transition metal ion binding (GO:0046914);; Molecular Function: organic cyclic compound binding (GO:0097159);; Molecular Function: heterocyclic compound binding (GO:1901363);;	K09506|1e-101|sbi:SORBI_08g015620|hypothetical protein	tRNA wybutosine-synthesizing protein 1 homolog OS=Arabidopsis thaliana GN=TYW1 PE=2 SV=1	hypothetical protein SORBIDRAFT_08g015620 [Sorghum bicolor]
comp13394_c0	[R]	General function prediction only	Cellular Component: nucleus (GO:0005634);; Biological Process: mRNA modification (GO:0016556);;	--	Rhodanese-like domain-containing protein 8, chloroplastic OS=Arabidopsis thaliana GN=STR8 PE=2 SV=1	unnamed protein product [Vitis vinifera]
comp26611_c0	--	--	Cellular Component: mitochondrion (GO:0005739);;	--	Pentatricopeptide repeat-containing protein At5g15300 OS=Arabidopsis thaliana GN=PCMP-E40 PE=2 SV=2	PREDICTED: pentatricopeptide repeat-containing protein At5g15300-like [Vitis vinifera]
comp30029_c0	--	--	Cellular Component: extracellular region (GO:0005576);; Cellular Component: membrane (GO:0016020);;	--	--	unknown [Populus trichocarpa]
comp382_c0	[G]	Carbohydrate transport and metabolism	Cellular Component: protein storage vacuole (GO:0000326);; Cellular Component: endoplasmic reticulum (GO:0005783);; Cellular Component: plasma membrane (GO:0005886);; Biological Process: water transport (GO:0006833);; Cellular Component: plant-type vacuole membrane (GO:0009705);; Cellular Component: chloroplast envelope (GO:0009941);; Molecular Function: urea transmembrane transporter activity (G…	--	Probable aquaporin TIP1-1 OS=Oryza sativa subsp. japonica GN=TIP1-1 PE=2 SV=1	aquaporin [Jatropha curcas]
comp20032_c0	--	--	--	--	E1A-binding protein p400 OS=Homo sapiens GN=EP400 PE=1 SV=4	unnamed protein product [Vitis vinifera]
comp19091_c0	--	--	Molecular Function: binding (GO:0005488);;	--	--	hypothetical protein MTR_120s0011 [Medicago truncatula]
comp10430_c0	--	--	Cellular Component: membrane (GO:0016020);; Cellular Component: cytoplasmic membrane-bounded vesicle (GO:0016023);;	--	Protein SYS1 homolog OS=Dictyostelium discoideum GN=sys1 PE=3 SV=1	Structural molecules [Theobroma cacao]
comp30589_c0	--	--	--	--	Protein FAR1-RELATED SEQUENCE 4 OS=Arabidopsis thaliana GN=FRS4 PE=2 SV=2	PREDICTED: protein FAR1-RELATED SEQUENCE 4-like isoform 2 [Cucumis sativus]
comp7558_c0	--	--	Molecular Function: protein serine/threonine kinase activity (GO:0004674);; Molecular Function: protein tyrosine kinase activity (GO:0004713);; Molecular Function: ATP binding (GO:0005524);; Biological Process: protein phosphorylation (GO:0006468);; Cellular Component: plastid (GO:0009536);;	--	Probable receptor-like protein kinase At2g42960 OS=Arabidopsis thaliana GN=At2g42960 PE=3 SV=1	hypothetical protein VITISV_037750 [Vitis vinifera]
comp2022_c0	[G]	Carbohydrate transport and metabolism	Biological Process: maltose metabolic process (GO:0000023);; Molecular Function: ATP binding (GO:0005524);; Cellular Component: cytosol (GO:0005829);; Biological Process: glycogen biosynthetic process (GO:0005978);; Biological Process: pentose-phosphate shunt (GO:0006098);; Molecular Function: glucose-1-phosphate adenylyltransferase activity (GO:0008878);; Cellular Component: amyloplast (GO:00095…	K00975|0.0|pop:POPTR_573143|glucose-1-phosphate adenylyltransferase (EC:2.7.7.27)	Glucose-1-phosphate adenylyltransferase small subunit 2, chloroplastic OS=Vicia faba GN=AGPP PE=2 SV=1	ADP-glucose pyrophosphorylase small subunit [Nicotiana tabacum]
comp14149_c0	--	--	Cellular Component: mitochondrion (GO:0005739);; Biological Process: embryo development ending in seed dormancy (GO:0009793);;	--	Translation initiation factor IF-2 OS=Mycobacterium marinum (strain ATCC BAA-535 / M) GN=infB PE=3 SV=1	PREDICTED: uncharacterized protein LOC100258570 [Vitis vinifera]
comp10298_c0	--	--	Molecular Function: adenyl nucleotide binding (GO:0030554);;	--	SNF1-related protein kinase regulatory subunit gamma-like PV42a OS=Arabidopsis thaliana GN=PV42A PE=2 SV=1	Os02g0158900 [Oryza sativa Japonica Group]
comp28875_c0	--	--	--	--	Pentatricopeptide repeat-containing protein At1g62720 OS=Arabidopsis thaliana GN=At1g62720 PE=2 SV=1	PREDICTED: pentatricopeptide repeat-containing protein At5g65560-like [Cucumis sativus]
comp6542_c0	--	--	Molecular Function: DNA-directed RNA polymerase activity (GO:0003899);; Cellular Component: nucleus (GO:0005634);; Biological Process: positive regulation of autophagy (GO:0010508);; Biological Process: RNA biosynthetic process (GO:0032774);;	--	--	PREDICTED: uncharacterized protein LOC100260778 [Vitis vinifera]
comp13916_c0	--	--	Biological Process: DNA recombination (GO:0006310);; Biological Process: cellular protein modification process (GO:0006464);; Biological Process: meiosis (GO:0007126);; Biological Process: multicellular organismal development (GO:0007275);; Biological Process: regulation of nucleobase-containing compound metabolic process (GO:0019219);; Biological Process: anatomical structure development (GO:004…	--	Nibrin OS=Pongo abelii GN=NBN PE=2 SV=2	Nibrin [Medicago truncatula]
comp14609_c0	--	--	Biological Process: embryo development (GO:0009790);; Biological Process: primary metabolic process (GO:0044238);; Biological Process: cellular macromolecule metabolic process (GO:0044260);; Biological Process: single-organism cellular process (GO:0044763);; Biological Process: seed development (GO:0048316);; Biological Process: shoot system development (GO:0048367);; Biological Process: regulati…	--	--	conserved hypothetical protein [Ricinus communis]
comp16882_c0	--	--	Biological Process: maltose metabolic process (GO:0000023);; Molecular Function: iron ion binding (GO:0005506);; Cellular Component: cytoplasm (GO:0005737);; Molecular Function: oxidoreductase activity, acting on paired donors, with incorporation or reduction of molecular oxygen, 2-oxoglutarate as one donor, and incorporation of one atom each of oxygen into both donors (GO:0016706);; Biological P…	--	--	2-oxoglutarate-dependent dioxygenase [Populus trichocarpa]
comp15986_c0	--	--	--	--	--	hypothetical protein [Beta vulgaris subsp. vulgaris]
comp630_c0	--	--	Molecular Function: nucleic acid binding (GO:0003676);; Cellular Component: spliceosomal complex (GO:0005681);; Biological Process: mRNA processing (GO:0006397);; Molecular Function: zinc ion binding (GO:0008270);; Biological Process: positive regulation of cell proliferation (GO:0008284);; Biological Process: RNA splicing (GO:0008380);;	K12819|0.0|vvi:100249416|hypothetical protein LOC100249416	Pre-mRNA-splicing factor SLU7 OS=Oryza sativa subsp. japonica GN=Os08g0127700 PE=2 SV=1	PREDICTED: pre-mRNA-splicing factor SLU7-A-like [Vitis vinifera]
comp32097_c0	[G]	Carbohydrate transport and metabolism	Molecular Function: hydrolase activity, hydrolyzing O-glycosyl compounds (GO:0004553);; Cellular Component: extracellular region (GO:0005576);; Biological Process: carbohydrate metabolic process (GO:0005975);;	--	Probable endo-1,4-beta-xylanase C OS=Neosartorya fumigata (strain CEA10 / CBS 144.89 / FGSC A1163) GN=xlnC PE=2 SV=2	endoxylanase [Carica papaya]
comp14061_c0	--	--	--	--	Filament-like plant protein (Fragment) OS=Solanum lycopersicum GN=FPP PE=1 SV=1	PREDICTED: filament-like plant protein 3-like isoform 1 [Vitis vinifera]
comp12952_c0	--	--	Molecular Function: protein serine/threonine kinase activity (GO:0004674);; Molecular Function: ATP binding (GO:0005524);; Cellular Component: plasma membrane (GO:0005886);; Biological Process: protein phosphorylation (GO:0006468);; Biological Process: protein N-linked glycosylation (GO:0006487);; Molecular Function: carbohydrate binding (GO:0030246);; Biological Process: recognition of pollen (G…	--	G-type lectin S-receptor-like serine/threonine-protein kinase At1g34300 OS=Arabidopsis thaliana GN=At1g34300 PE=1 SV=1	PREDICTED: G-type lectin S-receptor-like serine/threonine-protein kinase At1g34300-like [Setaria italica]
comp1253_c0	--	--	--	K04523|0.0|vvi:100250759|hypothetical protein LOC100250759	Ubiquitin domain-containing protein DSK2b OS=Arabidopsis thaliana GN=DSK2B PE=1 SV=1	PREDICTED: ubiquilin-1-like [Vitis vinifera]
comp8937_c0	--	--	--	K04392|1e-06|osa:4331272|Os02g0834000	Rac-like GTP-binding protein ARAC5 OS=Arabidopsis thaliana GN=ARAC5 PE=1 SV=1	PREDICTED: rac-like GTP-binding protein 2-like [Brachypodium distachyon]
comp34453_c0	--	--	Molecular Function: oxidoreductase activity (GO:0016491);;	--	--	FAD-binding Berberine family protein [Theobroma cacao]
comp9004_c0	[F]	Nucleotide transport and metabolism	Molecular Function: uracil phosphoribosyltransferase activity (GO:0004845);; Molecular Function: uridine kinase activity (GO:0004849);; Molecular Function: ATP binding (GO:0005524);; Biological Process: gluconeogenesis (GO:0006094);; Biological Process: cytoskeleton organization (GO:0007010);; Biological Process: proteasomal protein catabolic process (GO:0010498);; Biological Process: phosphoryla…	K00876|0.0|pop:POPTR_744904|hypothetical protein	Uridine kinase-like protein 4 OS=Arabidopsis thaliana GN=UKL4 PE=2 SV=2	predicted protein [Populus trichocarpa]
comp15825_c0	--	--	Molecular Function: hydrolase activity, hydrolyzing O-glycosyl compounds (GO:0004553);; Cellular Component: cell wall (GO:0005618);; Biological Process: cellular glucan metabolic process (GO:0006073);; Cellular Component: cytoplasmic membrane-bounded vesicle (GO:0016023);; Molecular Function: xyloglucan:xyloglucosyl transferase activity (GO:0016762);; Cellular Component: apoplast (GO:0048046);;	K08235|1e-29|osa:4328169|Os02g0127800	Probable xyloglucan endotransglucosylase/hydrolase protein 30 OS=Arabidopsis thaliana GN=XTH30 PE=2 SV=2	hypothetical protein ZEAMMB73_269375 [Zea mays]
comp796_c1	--	--	--	--	Putative invertase inhibitor OS=Platanus acerifolia PE=1 SV=1	PME/invertase inhibitor-like protein [Musa acuminata]
comp1701_c0	[T]	Signal transduction mechanisms	Molecular Function: phosphatidylinositol-4,5-bisphosphate 5-phosphatase activity (GO:0004439);; Molecular Function: protein tyrosine phosphatase activity (GO:0004725);; Molecular Function: protein tyrosine/serine/threonine phosphatase activity (GO:0008138);; Biological Process: peptidyl-tyrosine dephosphorylation (GO:0035335);; Biological Process: negative regulation of MAP kinase activity (GO:00…	--	Putative dual specificity protein phosphatase DSP8 OS=Arabidopsis thaliana GN=DSP8 PE=2 SV=2	protein-tyrosine phosphatase mitochondrial 1 [Zea mays]
comp23732_c0	[O]	Posttranslational modification, protein turnover, chaperones	Biological Process: metabolic process (GO:0008152);; Molecular Function: amino acid binding (GO:0016597);;	--	[Protein-PII] uridylyltransferase OS=Azospirillum brasilense GN=glnD PE=3 SV=1	PREDICTED: uncharacterized protein LOC100250497 [Vitis vinifera]
comp3965_c0	--	--	--	--	Double-stranded RNA-binding protein 1 OS=Oryza sativa subsp. japonica GN=DRB1 PE=2 SV=1	Double-stranded-RNA-binding protein 4, putative [Theobroma cacao]
comp8518_c0	[EH]	--	Biological Process: metabolic process (GO:0008152);; Molecular Function: transaminase activity (GO:0008483);; Cellular Component: chloroplast (GO:0009507);;	--	Branched-chain-amino-acid aminotransferase-like protein 1 OS=Arabidopsis thaliana GN=At3g05190 PE=2 SV=1	hypothetical protein OsJ_10916 [Oryza sativa Japonica Group]
comp10425_c0	[MG]	--	Molecular Function: nucleotide binding (GO:0000166);; Cellular Component: cytosol (GO:0005829);; Cellular Component: plasma membrane (GO:0005886);; Biological Process: lignin biosynthetic process (GO:0009809);; Molecular Function: cinnamoyl-CoA reductase activity (GO:0016621);; Molecular Function: dihydrokaempferol 4-reductase activity (GO:0045552);; Molecular Function: coenzyme binding (GO:00506…	--	Cinnamoyl-CoA reductase 1 OS=Arabidopsis thaliana GN=CCR1 PE=1 SV=1	PREDICTED: cinnamoyl-CoA reductase 1-like [Fragaria vesca subsp. vesca]
comp23330_c0	[S]	Function unknown	Cellular Component: extracellular region (GO:0005576);;	--	Pathogenesis-related protein PR-1 OS=Medicago truncatula GN=PR-1 PE=2 SV=1	predicted protein [Populus trichocarpa]
comp1792_c0	[T]	Signal transduction mechanisms	Biological Process: maltose metabolic process (GO:0000023);; Biological Process: starch catabolic process (GO:0005983);; Biological Process: protein dephosphorylation (GO:0006470);; Molecular Function: protein tyrosine/serine/threonine phosphatase activity (GO:0008138);; Cellular Component: chloroplast (GO:0009507);; Biological Process: starch biosynthetic process (GO:0019252);; Biological Proces…	--	Phosphoglucan phosphatase LSF2, chloroplastic OS=Arabidopsis thaliana GN=LSF2 PE=2 SV=1	dual specificity protein phosphatase, putative [Ricinus communis]
comp11964_c0	--	--	Molecular Function: calmodulin binding (GO:0005516);; Cellular Component: plasma membrane (GO:0005886);; Biological Process: defense response (GO:0006952);; Biological Process: cell death (GO:0008219);; Biological Process: response to biotic stimulus (GO:0009607);; Cellular Component: integral component of membrane (GO:0016021);; Cellular Component: cytoplasmic membrane-bounded vesicle (GO:001602…	--	MLO-like protein 4 OS=Arabidopsis thaliana GN=MLO4 PE=2 SV=2	PREDICTED: MLO16 protein [Vitis vinifera]
comp6753_c0	[E]	Amino acid transport and metabolism	Biological Process: respiratory burst involved in defense response (GO:0002679);; Molecular Function: glutamate-ammonia ligase activity (GO:0004356);; Cellular Component: cytosol (GO:0005829);; Biological Process: glutamine biosynthetic process (GO:0006542);; Biological Process: tryptophan catabolic process (GO:0006569);; Molecular Function: microtubule binding (GO:0008017);; Biological Process: …	--	Protein fluG OS=Emericella nidulans (strain FGSC A4 / ATCC 38163 / CBS 112.46 / NRRL 194 / M139) GN=fluG PE=1 SV=1	PREDICTED: protein fluG-like [Vitis vinifera]
comp6052_c0	[Z]	Cytoskeleton	Molecular Function: microtubule motor activity (GO:0003777);; Molecular Function: transmembrane receptor protein serine/threonine kinase activity (GO:0004675);; Molecular Function: ATP binding (GO:0005524);; Cellular Component: vacuole (GO:0005773);; Cellular Component: kinesin complex (GO:0005871);; Cellular Component: microtubule (GO:0005874);; Cellular Component: plasma membrane (GO:0005886);;…	--	Armadillo repeat-containing kinesin-like protein 2 OS=Oryza sativa subsp. japonica GN=Os06g0137100 PE=2 SV=1	hypothetical protein PRUPE_ppa001070mg [Prunus persica]
comp11579_c0	--	--	--	--	--	hypothetical protein CARUB_v100151920mg, partial [Capsella rubella]
comp19563_c0	--	--	--	--	--	PREDICTED: uncharacterized protein LOC100247517 [Vitis vinifera]
comp6498_c0	[C]	Energy production and conversion	Cellular Component: chloroplast thylakoid (GO:0009534);; Biological Process: photosynthesis (GO:0015979);; Biological Process: chlorophyll biosynthetic process (GO:0015995);; Cellular Component: membrane (GO:0016020);; Molecular Function: oxidoreductase activity, acting on the CH-CH group of donors, NAD or NADP as acceptor (GO:0016628);; Biological Process: primary metabolic process (GO:0044238);…	K10960|2e-35|sbi:SORBI_03g010340|hypothetical protein	Geranylgeranyl diphosphate reductase, chloroplastic OS=Arabidopsis thaliana GN=CHLP PE=1 SV=1	hypothetical protein SORBIDRAFT_03g010340 [Sorghum bicolor]
comp39809_c0	--	--	--	--	LIM domain-containing protein A OS=Dictyostelium discoideum GN=limA PE=2 SV=1	--
comp1830_c0	[E]	Amino acid transport and metabolism	Molecular Function: 3-isopropylmalate dehydratase activity (GO:0003861);; Biological Process: leucine biosynthetic process (GO:0009098);; Cellular Component: 3-isopropylmalate dehydratase complex (GO:0009316);; Cellular Component: chloroplast stroma (GO:0009570);; Biological Process: response to salt stress (GO:0009651);; Cellular Component: cytoplasmic membrane-bounded vesicle (GO:0016023);;	K01704|1e-109|sbi:SORBI_04g033080|hypothetical protein	3-isopropylmalate dehydratase small subunit OS=Thermodesulfovibrio yellowstonii (strain ATCC 51303 / DSM 11347 / YP87) GN=leuD PE=3 SV=1	hypothetical protein SORBIDRAFT_04g033080 [Sorghum bicolor]
comp37070_c0	--	--	Molecular Function: hydrolase activity (GO:0016787);;	--	Vegetative cell wall protein gp1 OS=Chlamydomonas reinhardtii GN=GP1 PE=2 SV=1	Os07g0565700 [Oryza sativa Japonica Group]
comp13588_c0	[J]	Translation, ribosomal structure and biogenesis	Biological Process: pseudouridine synthesis (GO:0001522);; Molecular Function: RNA binding (GO:0003723);; Molecular Function: monooxygenase activity (GO:0004497);; Molecular Function: iron ion binding (GO:0005506);; Biological Process: protein folding (GO:0006457);; Molecular Function: electron carrier activity (GO:0009055);; Biological Process: response to heat (GO:0009408);; Biological Process:…	--	RNA pseudouridine synthase 1 OS=Oryza sativa subsp. japonica GN=Os12g0560500 PE=2 SV=1	predicted protein [Populus trichocarpa]
comp30192_c0	--	--	--	--	--	hypothetical protein VITISV_027353 [Vitis vinifera]
comp13182_c0	--	--	Molecular Function: nucleic acid binding (GO:0003676);; Biological Process: cellular process (GO:0009987);; Biological Process: gene expression (GO:0010467);;	--	Protein argonaute 2 OS=Oryza sativa subsp. japonica GN=AGO2 PE=2 SV=2	hypothetical protein PRUPE_ppa000866m1g, partial [Prunus persica]
comp8520_c0	[S]	Function unknown	Cellular Component: cytoplasmic membrane-bounded vesicle (GO:0016023);;	--	Vegetative cell wall protein gp1 OS=Chlamydomonas reinhardtii GN=GP1 PE=2 SV=1	hypothetical protein precursor [Zea mays]
comp9308_c0	--	--	Cellular Component: nuclear ubiquitin ligase complex (GO:0000152);; Molecular Function: nucleotide binding (GO:0000166);; Biological Process: developmental process involved in reproduction (GO:0003006);; Molecular Function: protein serine/threonine kinase activity (GO:0004674);; Molecular Function: protein binding (GO:0005515);; Biological Process: glucose catabolic process (GO:0006007);; Biologi…	K07198|1e-71|pop:POPTR_818055|hypothetical protein	SNF1-related protein kinase catalytic subunit alpha KIN10 OS=Arabidopsis thaliana GN=KIN10 PE=1 SV=2	predicted protein [Populus trichocarpa]
comp19888_c0	--	--	--	--	--	Putative nuclease HARBI1 [Triticum urartu]
comp414_c0	[J]	Translation, ribosomal structure and biogenesis	Molecular Function: structural constituent of ribosome (GO:0003735);; Cellular Component: vacuole (GO:0005773);; Cellular Component: Golgi apparatus (GO:0005794);; Biological Process: translation (GO:0006412);; Cellular Component: cytosolic large ribosomal subunit (GO:0022625);;	K02868|1e-111|rcu:RCOM_1594400|60S ribosomal protein L11, putative	60S ribosomal protein L11-2 OS=Arabidopsis thaliana GN=RPL11B PE=2 SV=2	Ribosomal L5P family protein isoform 2 [Theobroma cacao]
comp537_c0	--	--	--	--	CYC02 protein OS=Catharanthus roseus GN=CYC02 PE=2 SV=1	RecName: Full=CYC02 protein
comp6067_c0	[C]	Energy production and conversion	Biological Process: polysaccharide biosynthetic process (GO:0000271);; Biological Process: polysaccharide catabolic process (GO:0000272);; Molecular Function: calmodulin binding (GO:0005516);; Cellular Component: vacuolar membrane (GO:0005774);; Cellular Component: plasma membrane (GO:0005886);; Biological Process: starch metabolic process (GO:0005982);; Biological Process: acetyl-CoA metabolic p…	K09828|0.0|vvi:100258158|hypothetical protein LOC100258158	Delta(24)-sterol reductase OS=Pisum sativum GN=DIM PE=1 SV=1	Cell elongation protein diminuto, putative [Ricinus communis]
comp2626_c0	--	--	Cellular Component: endosome (GO:0005768);; Cellular Component: Golgi apparatus (GO:0005794);; Cellular Component: trans-Golgi network (GO:0005802);; Cellular Component: chloroplast (GO:0009507);; Cellular Component: integral component of membrane (GO:0016021);; Cellular Component: cytoplasmic membrane-bounded vesicle (GO:0016023);;	--	Protein GPR107 OS=Mus musculus GN=Gpr107 PE=2 SV=2	Lung seven transmembrane receptor family protein [Theobroma cacao]
comp14763_c0	--	--	Biological Process: organelle organization (GO:0006996);; Biological Process: primary metabolic process (GO:0044238);; Biological Process: cellular macromolecule metabolic process (GO:0044260);;	--	Myosin-11 OS=Gallus gallus GN=MYH11 PE=1 SV=4	kinesin, putative [Ricinus communis]
comp1964_c0	[R]	General function prediction only	Molecular Function: beta-ureidopropionase activity (GO:0003837);; Cellular Component: cytosol (GO:0005829);; Biological Process: uracil catabolic process (GO:0006212);; Biological Process: cellular response to nitrogen levels (GO:0043562);;	K01431|0.0|rcu:RCOM_0449350|Beta-ureidopropionase, putative (EC:3.5.1.6)	Beta-ureidopropionase OS=Dictyostelium discoideum GN=pyd3 PE=1 SV=1	Beta-ureidopropionase, putative [Ricinus communis]
comp1483_c0	--	--	Molecular Function: DNA binding (GO:0003677);; Molecular Function: sequence-specific DNA binding transcription factor activity (GO:0003700);; Cellular Component: nucleus (GO:0005634);; Biological Process: regulation of transcription, DNA-templated (GO:0006355);; Molecular Function: protein dimerization activity (GO:0046983);;	K09264|1e-83|vvi:100232867|MADS2	Developmental protein SEPALLATA 1 OS=Arabidopsis thaliana GN=SEP1 PE=1 SV=2	MADS-box transcription factor [Alstroemeria ligtu subsp. ligtu]
comp16592_c0	[M]	Cell wall/membrane/envelope biogenesis	Cellular Component: Golgi apparatus (GO:0005794);; Molecular Function: zinc ion binding (GO:0008270);; Biological Process: primary cell wall biogenesis (GO:0009833);; Biological Process: seed coat development (GO:0010214);; Cellular Component: integral component of membrane (GO:0016021);; Biological Process: cell growth (GO:0016049);; Molecular Function: cellulose synthase (UDP-forming) activity …	K10999|0.0|vvi:100255463|hypothetical protein LOC100255463	Cellulose synthase A catalytic subunit 2 [UDP-forming] OS=Arabidopsis thaliana GN=CESA2 PE=1 SV=1	unnamed protein product [Vitis vinifera]
comp36691_c0	--	--	--	--	--	hypothetical protein CARUB_v10026891mg [Capsella rubella]
comp32235_c0	--	--	Cellular Component: Golgi apparatus (GO:0005794);; Biological Process: metabolic process (GO:0008152);; Cellular Component: membrane (GO:0016020);; Molecular Function: transferase activity, transferring glycosyl groups (GO:0016757);;	--	Probable glycosyltransferase At5g03795 OS=Arabidopsis thaliana GN=At5g03795 PE=3 SV=2	PREDICTED: probable glycosyltransferase At5g03795-like [Cicer arietinum]
comp636_c0	[E]	Amino acid transport and metabolism	Molecular Function: asparagine synthase (glutamine-hydrolyzing) activity (GO:0004066);; Molecular Function: ATP binding (GO:0005524);; Biological Process: glutamine metabolic process (GO:0006541);; Biological Process: cellular amino acid catabolic process (GO:0009063);; Biological Process: response to absence of light (GO:0009646);; Biological Process: response to sucrose (GO:0009744);; Biologica…	K01953|0.0|vvi:100241610|hypothetical protein LOC100241610	Asparagine synthetase [glutamine-hydrolyzing] OS=Asparagus officinalis PE=2 SV=2	asparagine synthetase [Asparagus officinalis]
comp11444_c0	[R]	General function prediction only	Cellular Component: plastid (GO:0009536);; Molecular Function: oxidoreductase activity (GO:0016491);; Biological Process: oxidation-reduction process (GO:0055114);;	--	Uncharacterized oxidoreductase At4g09670 OS=Arabidopsis thaliana GN=At4g09670 PE=1 SV=1	Oxidoreductase family protein [Theobroma cacao]
comp6548_c0	--	--	Biological Process: phosphatidylinositol biosynthetic process (GO:0006661);;	--	Uncharacterized membrane protein At4g09580 OS=Arabidopsis thaliana GN=At4g09580 PE=1 SV=1	unnamed protein product [Vitis vinifera]
comp2437_c0	[T]	Signal transduction mechanisms	Biological Process: response to molecule of fungal origin (GO:0002238);; Cellular Component: cytoplasm (GO:0005737);; Cellular Component: plasma membrane (GO:0005886);; Biological Process: response to stress (GO:0006950);;	--	Universal stress protein A-like protein OS=Arabidopsis thaliana GN=At3g01520 PE=1 SV=2	PREDICTED: universal stress protein A-like protein-like [Setaria italica]
comp8455_c0	--	--	--	--	Serine/arginine repetitive matrix protein 1 OS=Gallus gallus GN=SRRM1 PE=2 SV=1	hypothetical protein CPAR2_403520 [Candida parapsilosis]
comp23347_c0	[R]	General function prediction only	Biological Process: cell redox homeostasis (GO:0045454);;	--	Inactive TPR repeat-containing thioredoxin TTL3 OS=Arabidopsis thaliana GN=TTL3 PE=1 SV=2	unnamed protein product [Vitis vinifera]
comp11626_c0	[R]	General function prediction only	--	--	--	PREDICTED: uncharacterized protein R106-like [Brachypodium distachyon]
comp553_c0	[I]	Lipid transport and metabolism	Molecular Function: nucleotide binding (GO:0000166);; Molecular Function: mRNA binding (GO:0003729);; Molecular Function: 3-hydroxyacyl-CoA dehydrogenase activity (GO:0003857);; Molecular Function: dodecenoyl-CoA delta-isomerase activity (GO:0004165);; Molecular Function: enoyl-CoA hydratase activity (GO:0004300);; Cellular Component: cell wall (GO:0005618);; Cellular Component: peroxisome (GO:00…	K10527|0.0|osa:4328997|Os02g0274100	Peroxisomal fatty acid beta-oxidation multifunctional protein OS=Oryza sativa subsp. japonica GN=MFP PE=1 SV=2	Enoyl-CoA hydratase/isomerase family [Theobroma cacao]
comp16806_c0	--	--	Biological Process: cytokinesis (GO:0000910);; Cellular Component: cytosol (GO:0005829);; Biological Process: protein folding (GO:0006457);; Biological Process: microtubule nucleation (GO:0007020);; Biological Process: tubulin complex assembly (GO:0007021);; Biological Process: cell-cell signaling (GO:0007267);; Cellular Component: plasmodesma (GO:0009506);; Biological Process: virus induced gene…	--	Tubulin-specific chaperone D OS=Homo sapiens GN=TBCD PE=1 SV=2	hypothetical protein PRUPE_ppa000353mg [Prunus persica]
comp1144_c0	[E]	Amino acid transport and metabolism	Molecular Function: aminopeptidase activity (GO:0004177);; Cellular Component: plastid (GO:0009536);; Biological Process: cellular process (GO:0009987);; Molecular Function: dipeptidase activity (GO:0016805);; Molecular Function: manganese ion binding (GO:0030145);;	K14213|0.0|osa:4328771|Os02g0224400	Xaa-Pro dipeptidase OS=Homo sapiens GN=PEPD PE=1 SV=3	Os02g0224400 [Oryza sativa Japonica Group]
comp1465_c0	[C]	Energy production and conversion	Molecular Function: pyruvate dehydrogenase (acetyl-transferring) activity (GO:0004739);; Cellular Component: nucleus (GO:0005634);; Cellular Component: mitochondrial matrix (GO:0005759);; Cellular Component: cytosol (GO:0005829);; Biological Process: glycolysis (GO:0006096);; Molecular Function: zinc ion binding (GO:0008270);; Biological Process: response to salt stress (GO:0009651);; Biological …	K00161|0.0|vvi:100263880|hypothetical protein LOC100263880	Pyruvate dehydrogenase E1 component subunit alpha-1, mitochondrial OS=Oryza sativa subsp. japonica GN=Os02g0739600 PE=2 SV=1	hypothetical protein PRUPE_ppa006652mg [Prunus persica]
comp29536_c0	--	--	Molecular Function: catalytic activity (GO:0003824);; Molecular Function: binding (GO:0005488);;	--	Putative ribonuclease H protein At1g65750 OS=Arabidopsis thaliana GN=At1g65750 PE=3 SV=1	hypothetical protein VITISV_020585 [Vitis vinifera]
comp20861_c0	--	--	--	--	Ethylene-responsive transcription factor ERF017 OS=Arabidopsis thaliana GN=ERF017 PE=2 SV=1	PREDICTED: ethylene-responsive transcription factor ERF017-like [Vitis vinifera]
comp3872_c0	--	--	Molecular Function: ubiquitin-protein ligase activity (GO:0004842);; Cellular Component: mitochondrion (GO:0005739);; Biological Process: mitochondrion organization (GO:0007005);; Molecular Function: zinc ion binding (GO:0008270);; Biological Process: chloroplast organization (GO:0009658);; Cellular Component: chloroplast envelope (GO:0009941);; Biological Process: protein ubiquitination (GO:0016…	--	Mitochondrial ubiquitin ligase activator of NFKB 1 OS=Homo sapiens GN=MUL1 PE=1 SV=1	PREDICTED: mitochondrial ubiquitin ligase activator of nfkb 1 [Vitis vinifera]
comp35873_c0	--	--	Cellular Component: plastid (GO:0009536);;	--	Protein CHLOROPLAST IMPORT APPARATUS 2 OS=Arabidopsis thaliana GN=CIA2 PE=2 SV=1	PREDICTED: protein CHLOROPLAST IMPORT APPARATUS 2-like isoform 1 [Fragaria vesca subsp. vesca]
comp26188_c0	[IQR]	--	Molecular Function: 3-oxoacyl-[acyl-carrier-protein] reductase (NADPH) activity (GO:0004316);; Biological Process: oxidation-reduction process (GO:0055114);;	K00059|3e-27|rcu:RCOM_1121800|short-chain type dehydrogenase, putative (EC:1.1.1.100)	Short-chain type dehydrogenase/reductase OS=Picea abies PE=2 SV=1	PREDICTED: short-chain type dehydrogenase/reductase-like [Cucumis sativus]
comp4452_c0	--	--	Cellular Component: intracellular membrane-bounded organelle (GO:0043231);; Cellular Component: cytoplasmic part (GO:0044444);;	--	--	Uncharacterized protein TCM_038592 [Theobroma cacao]
comp31230_c0	--	--	Molecular Function: binding (GO:0005488);;	K08775|3e-24|vvi:100241398|hypothetical protein LOC100241398	--	hypothetical protein VITISV_037889 [Vitis vinifera]
comp37736_c0	--	--	Cellular Component: membrane (GO:0016020);; Cellular Component: cytoplasmic membrane-bounded vesicle (GO:0016023);;	--	WAT1-related protein At4g01440 OS=Arabidopsis thaliana GN=At4g01440 PE=2 SV=1	PREDICTED: auxin-induced protein 5NG4-like [Brachypodium distachyon]
comp9046_c0	[J]	Translation, ribosomal structure and biogenesis	Biological Process: metabolic process (GO:0008152);; Molecular Function: transferase activity (GO:0016740);; Biological Process: single-organism cellular process (GO:0044763);; Molecular Function: organic cyclic compound binding (GO:0097159);; Molecular Function: heterocyclic compound binding (GO:1901363);;	--	Zinc finger CCCH domain-containing protein 24 OS=Arabidopsis thaliana GN=At2g28450 PE=2 SV=1	PREDICTED: zinc finger CCCH domain-containing protein 24-like [Vitis vinifera]
comp4563_c0	--	--	Molecular Function: signal transducer activity (GO:0004871);; Cellular Component: nucleus (GO:0005634);; Cellular Component: cytoplasm (GO:0005737);; Cellular Component: plasma membrane (GO:0005886);; Biological Process: calcium ion transport (GO:0006816);; Biological Process: Golgi organization (GO:0007030);; Biological Process: signal transduction (GO:0007165);; Biological Process: phototropism…	--	Root phototropism protein 2 OS=Arabidopsis thaliana GN=RPT2 PE=1 SV=2	Root phototropism protein, putative [Ricinus communis]
comp7685_c0	[M]	Cell wall/membrane/envelope biogenesis	Biological Process: very long-chain fatty acid metabolic process (GO:0000038);; Cellular Component: extracellular region (GO:0005576);; Biological Process: lipid transport (GO:0006869);; Molecular Function: lipid binding (GO:0008289);; Cellular Component: chloroplast thylakoid membrane (GO:0009535);; Cellular Component: cytoplasmic membrane-bounded vesicle (GO:0016023);; Biological Process: cutic…	--	14 kDa proline-rich protein DC2.15 OS=Daucus carota PE=2 SV=1	Bifunctional inhibitor/lipid-transfer protein/seed storage 2S albumin superfamily protein [Theobroma cacao]
comp14411_c0	--	--	--	--	Protein FAR1-RELATED SEQUENCE 11 OS=Arabidopsis thaliana GN=FRS11 PE=2 SV=1	hypothetical protein VITISV_044035 [Vitis vinifera]
comp28682_c0	--	--	Cellular Component: mitochondrion (GO:0005739);;	--	Rab9 effector protein with kelch motifs OS=Homo sapiens GN=RABEPK PE=1 SV=1	PREDICTED: LOW QUALITY PROTEIN: acyl-CoA-binding domain-containing protein 4 [Vitis vinifera]
comp13616_c0	--	--	--	--	BEL1-like homeodomain protein 4 OS=Arabidopsis thaliana GN=BLH4 PE=2 SV=2	hypothetical protein SORBIDRAFT_01g009130 [Sorghum bicolor]
comp4069_c0	--	--	--	--	Uncharacterized RNA-binding protein C17H9.04c OS=Schizosaccharomyces pombe (strain 972 / ATCC 24843) GN=SPAC17H9.04c PE=1 SV=1	PREDICTED: uncharacterized protein LOC100245437 [Vitis vinifera]
comp11186_c0	--	--	--	--	F-box protein At2g27310 OS=Arabidopsis thaliana GN=At2g27310 PE=2 SV=1	F-box family protein [Theobroma cacao]
comp21327_c0	--	--	--	--	--	PREDICTED: uncharacterized protein LOC101784438 [Setaria italica]
comp31301_c0	--	--	Cellular Component: plasma membrane (GO:0005886);; Biological Process: oligopeptide transport (GO:0006857);; Molecular Function: oligopeptide transporter activity (GO:0015198);; Biological Process: transmembrane transport (GO:0055085);;	--	Oligopeptide transporter 7 OS=Arabidopsis thaliana GN=OPT7 PE=2 SV=1	PREDICTED: oligopeptide transporter 7-like isoform X2 [Setaria italica]
comp15067_c0	--	--	--	--	--	PREDICTED: uncharacterized protein LOC100242196 [Vitis vinifera]
comp22948_c0	--	--	--	--	--	unknown [Glycine max]
comp13735_c0	--	--	--	--	--	hypothetical protein PRUPE_ppa026022mg [Prunus persica]
comp10915_c0	[DZ]	--	Molecular Function: phospholipid binding (GO:0005543);; Cellular Component: plasma membrane (GO:0005886);; Cellular Component: cell cortex (GO:0005938);; Biological Process: cortical protein anchoring (GO:0032065);; Molecular Function: metal ion binding (GO:0046872);;	--	Ultraviolet-B receptor UVR8 OS=Arabidopsis thaliana GN=UVR8 PE=1 SV=1	Ran GTPase binding protein, putative [Ricinus communis]
comp1306_c0	[O]	Posttranslational modification, protein turnover, chaperones	Cellular Component: vacuolar membrane (GO:0005774);; Cellular Component: Golgi apparatus (GO:0005794);; Cellular Component: plasma membrane (GO:0005886);; Cellular Component: plasmodesma (GO:0009506);;	--	Hypersensitive-induced response protein 4 OS=Arabidopsis thaliana GN=HIR4 PE=1 SV=1	hypothetical protein VITISV_021053 [Vitis vinifera]
comp8145_c0	--	--	--	--	--	hypothetical protein VITISV_000144 [Vitis vinifera]
comp3347_c0	--	--	--	--	Protein WVD2-like 1 OS=Arabidopsis thaliana GN=WDL1 PE=2 SV=1	TPA: hypothetical protein ZEAMMB73_567014 [Zea mays]
comp9464_c0	[RTKL]	--	Molecular Function: magnesium ion binding (GO:0000287);; Molecular Function: protein serine/threonine kinase activity (GO:0004674);; Molecular Function: protein tyrosine kinase activity (GO:0004713);; Molecular Function: pyruvate kinase activity (GO:0004743);; Molecular Function: ATP binding (GO:0005524);; Cellular Component: plasma membrane (GO:0005886);; Biological Process: glycolysis (GO:00060…	K14500|0.0|osa:4349455|Os10g0571300	Probable serine/threonine-protein kinase At4g35230 OS=Arabidopsis thaliana GN=At4g35230 PE=1 SV=1	Os10g0571300 [Oryza sativa Japonica Group]
comp6331_c0	[R]	General function prediction only	Biological Process: mitotic G2 phase (GO:0000085);; Molecular Function: nucleotide binding (GO:0000166);; Cellular Component: nucleus (GO:0005634);; Cellular Component: cytosol (GO:0005829);; Biological Process: RNA processing (GO:0006396);; Biological Process: protein import into nucleus (GO:0006606);; Molecular Function: poly(A) binding (GO:0008143);; Biological Process: photomorphogenesis (GO:…	K14396|5e-70|vvi:100242522|hypothetical protein LOC100242522	Polyadenylate-binding protein 2 OS=Schizosaccharomyces pombe (strain 972 / ATCC 24843) GN=pab2 PE=3 SV=1	hypothetical protein VITISV_031100 [Vitis vinifera]
comp17166_c0	--	--	Molecular Function: transferase activity, transferring hexosyl groups (GO:0016758);;	--	Putative UDP-glucose glucosyltransferase OS=Fragaria ananassa GN=GT5 PE=2 SV=1	PREDICTED: cinnamate beta-D-glucosyltransferase-like [Brachypodium distachyon]
comp3692_c0	[IQ]	--	Molecular Function: nucleotide binding (GO:0000166);; Molecular Function: oxidoreductase activity (GO:0016491);; Molecular Function: ligase activity (GO:0016874);; Biological Process: single-organism metabolic process (GO:0044710);;	K01904|0.0|vvi:100267198|hypothetical protein LOC100267198	4-coumarate--CoA ligase-like 1 OS=Oryza sativa subsp. japonica GN=4CLL1 PE=2 SV=2	PREDICTED: 4-coumarate--CoA ligase-like 7 [Vitis vinifera]
comp22245_c0	--	--	Molecular Function: aspartic-type endopeptidase activity (GO:0004190);; Cellular Component: integral component of membrane (GO:0016021);; Biological Process: calcium-mediated signaling (GO:0019722);;	--	Presenilin-like protein At1g08700 OS=Arabidopsis thaliana GN=At1g08700 PE=2 SV=1	hypothetical protein VOLCADRAFT_86831 [Volvox carteri f. nagariensis]
comp25067_c0	--	--	Molecular Function: organic cyclic compound binding (GO:0097159);; Molecular Function: heterocyclic compound binding (GO:1901363);;	--	--	PREDICTED: uncharacterized protein LOC100855311 [Vitis vinifera]
comp37390_c0	--	--	Molecular Function: nucleic acid binding (GO:0003676);; Biological Process: DNA metabolic process (GO:0006259);; Molecular Function: kinase activity (GO:0016301);; Molecular Function: hydrolase activity (GO:0016787);; Molecular Function: ion binding (GO:0043167);;	--	Retrovirus-related Pol polyprotein from transposon TNT 1-94 OS=Nicotiana tabacum PE=2 SV=1	Integrase core domain containing protein [Solanum demissum]
comp16875_c0	[Z]	Cytoskeleton	Molecular Function: microtubule motor activity (GO:0003777);; Molecular Function: ATP binding (GO:0005524);; Cellular Component: cytoplasm (GO:0005737);; Cellular Component: kinesin complex (GO:0005871);; Cellular Component: microtubule (GO:0005874);; Cellular Component: plasma membrane (GO:0005886);; Biological Process: microtubule-based movement (GO:0007018);; Molecular Function: microtubule bi…	--	Kinesin-like protein NACK1 OS=Nicotiana tabacum GN=NACK1 PE=1 SV=1	PREDICTED: uncharacterized protein LOC100250389 [Vitis vinifera]
comp4515_c0	--	--	--	--	--	hypothetical protein RO3G_02346 [Rhizopus delemar RA 99-880]
comp5537_c0	[S]	Function unknown	--	--	IMPACT family member in pol 5&apos;region (Fragment) OS=Thermus thermophilus PE=3 SV=1	Ribosomal protein S5 domain 2-like superfamily protein isoform 1 [Theobroma cacao]
comp6094_c0	--	--	Biological Process: nitrogen compound metabolic process (GO:0006807);; Cellular Component: photosystem II (GO:0009523);; Cellular Component: chloroplast thylakoid membrane (GO:0009535);; Biological Process: photosynthesis (GO:0015979);; Biological Process: primary metabolic process (GO:0044238);; Biological Process: organic substance metabolic process (GO:0071704);;	--	PsbP-like protein 2, chloroplastic OS=Arabidopsis thaliana GN=PPL2 PE=1 SV=2	Os03g0279950 [Oryza sativa Japonica Group]
comp42676_c0	--	--	--	--	--	PREDICTED: uncharacterized protein LOC100831706 [Brachypodium distachyon]
comp32157_c0	--	--	Molecular Function: binding (GO:0005488);;	--	Basic-leucine zipper transcription factor A OS=Dictyostelium discoideum GN=dimA PE=1 SV=2	PREDICTED: putative DNA-binding protein ESCAROLA-like [Setaria italica]
comp13266_c0	--	--	--	--	--	reverse transcriptase family member [Glycine max]
comp13352_c0	[J]	Translation, ribosomal structure and biogenesis	Molecular Function: tryptophan-tRNA ligase activity (GO:0004830);; Molecular Function: ATP binding (GO:0005524);; Cellular Component: mitochondrion (GO:0005739);; Biological Process: tryptophanyl-tRNA aminoacylation (GO:0006436);; Cellular Component: chloroplast stroma (GO:0009570);; Biological Process: chloroplast organization (GO:0009658);; Biological Process: embryo development ending in seed …	K01867|0.0|vvi:100262715|similar to putative tryptophanyl-tRNA synthetase	Tryptophan--tRNA ligase OS=Nostoc sp. (strain PCC 7120 / UTEX 2576) GN=trpS PE=3 SV=1	Nucleotidylyl transferase superfamily protein isoform 3 [Theobroma cacao]
comp20202_c0	--	--	--	--	--	PREDICTED: uncharacterized protein LOC100853799 [Vitis vinifera]
comp1432_c0	--	--	Biological Process: RNA splicing, via endonucleolytic cleavage and ligation (GO:0000394);; Molecular Function: dolichyl-diphosphooligosaccharide-protein glycotransferase activity (GO:0004579);; Cellular Component: endoplasmic reticulum membrane (GO:0005789);; Biological Process: protein glycosylation (GO:0006486);; Biological Process: N-terminal protein myristoylation (GO:0006499);; Biological Pr…	K12666|0.0|vvi:100249589|hypothetical protein LOC100249589	Dolichyl-diphosphooligosaccharide--protein glycosyltransferase subunit 1A OS=Oryza sativa subsp. japonica GN=OST1A PE=2 SV=1	PREDICTED: dolichyl-diphosphooligosaccharide--protein glycosyltransferase subunit 1 [Vitis vinifera]
comp11222_c0	[E]	Amino acid transport and metabolism	Biological Process: transport (GO:0006810);; Cellular Component: membrane (GO:0016020);;	--	Peptide transporter PTR1 OS=Arabidopsis thaliana GN=PTR1 PE=2 SV=1	PREDICTED: peptide transporter PTR2-like [Brachypodium distachyon]
comp35342_c0	--	--	Cellular Component: extracellular region (GO:0005576);; Biological Process: signal transduction (GO:0007165);; Biological Process: metabolic process (GO:0008152);; Cellular Component: cytoplasmic membrane-bounded vesicle (GO:0016023);; Molecular Function: oxidoreductase activity (GO:0016491);;	--	Protein TOO MANY MOUTHS OS=Arabidopsis thaliana GN=TMM PE=2 SV=1	putative leucine-rich repeat family protein [Oryza sativa Japonica Group]
comp19865_c0	--	--	--	--	--	Zinc knuckle family protein, putative isoform 1 [Theobroma cacao]
comp6906_c0	--	--	--	--	--	PREDICTED: uncharacterized protein LOC100241217 [Vitis vinifera]
comp66_c0	[OC]	--	Cellular Component: lytic vacuole within protein storage vacuole (GO:0000327);; Molecular Function: protein disulfide isomerase activity (GO:0003756);; Molecular Function: dolichyl-diphosphooligosaccharide-protein glycotransferase activity (GO:0004579);; Cellular Component: endoplasmic reticulum lumen (GO:0005788);; Cellular Component: plasma membrane (GO:0005886);; Biological Process: glycerol e…	K09580|0.0|rcu:RCOM_1030540|protein disulfide isomerase, putative (EC:2.4.1.119)	Protein disulfide-isomerase OS=Ricinus communis PE=1 SV=1	protein disulfide isomerase, putative [Ricinus communis]
comp15963_c0	--	--	--	--	--	hypothetical protein SORBIDRAFT_07g001450 [Sorghum bicolor]
comp14074_c0	[RTKL]	--	Molecular Function: nucleotide binding (GO:0000166);; Molecular Function: protein serine/threonine kinase activity (GO:0004674);; Cellular Component: cytoplasmic membrane-bounded vesicle (GO:0016023);; Biological Process: phosphorylation (GO:0016310);; Biological Process: response to stimulus (GO:0050896);;	--	L-type lectin-domain containing receptor kinase IV.1 OS=Arabidopsis thaliana GN=LECRK41 PE=1 SV=1	Receptor lectin kinase [Theobroma cacao]
comp16511_c0	--	--	--	--	--	PREDICTED: uncharacterized protein LOC101767061 [Setaria italica]
comp12707_c0	--	--	Molecular Function: protein binding (GO:0005515);; Biological Process: response to auxin (GO:0009733);; Molecular Function: sequence-specific DNA binding (GO:0043565);; Biological Process: positive regulation of transcription, DNA-templated (GO:0045893);;	--	Pathogenesis-related homeodomain protein OS=Arabidopsis thaliana GN=PRH PE=2 SV=1	PREDICTED: pathogenesis-related homeodomain protein-like [Cucumis sativus]
comp23816_c0	--	--	Cellular Component: cytoplasm (GO:0005737);; Biological Process: response to stimulus (GO:0050896);;	--	Uncharacterized protein LOC284861 OS=Homo sapiens PE=2 SV=1	PREDICTED: heat shock protein hsp98-like [Setaria italica]
comp1339_c0	[P]	Inorganic ion transport and metabolism	Cellular Component: mitochondrion (GO:0005739);; Cellular Component: vacuolar membrane (GO:0005774);; Cellular Component: peroxisomal membrane (GO:0005778);; Cellular Component: Golgi apparatus (GO:0005794);; Cellular Component: cytosol (GO:0005829);; Biological Process: response to oxidative stress (GO:0006979);; Cellular Component: plasmodesma (GO:0009506);; Cellular Component: chloroplast enve…	K00434|1e-171|rcu:RCOM_0491260|L-ascorbate peroxidase 1, cytosolic, putative (EC:1.11.1.11)	L-ascorbate peroxidase 3, peroxisomal OS=Arabidopsis thaliana GN=APX3 PE=2 SV=1	ascorbate peroxidase [Zantedeschia aethiopica]
comp3285_c0	[L]	Replication, recombination and repair	Molecular Function: DNA binding (GO:0003677);;	--	Protein OSB1, mitochondrial OS=Arabidopsis thaliana GN=OSB1 PE=1 SV=1	unnamed protein product [Vitis vinifera]
comp6555_c0	[R]	General function prediction only	Cellular Component: cytoplasmic membrane-bounded vesicle (GO:0016023);; Molecular Function: hydrolase activity (GO:0016787);;	--	Uncharacterized protein DKFZp434B061 OS=Homo sapiens PE=2 SV=2	PREDICTED: uncharacterized protein LOC100824638 isoform 1 [Brachypodium distachyon]
comp6455_c0	--	--	--	--	Putative disease resistance protein RGA3 OS=Solanum bulbocastanum GN=RGA3 PE=2 SV=2	PREDICTED: putative disease resistance RPP13-like protein 1-like [Vitis vinifera]
comp33046_c0	--	--	Cellular Component: nucleosome (GO:0000786);; Molecular Function: DNA binding (GO:0003677);; Cellular Component: nucleus (GO:0005634);; Biological Process: nucleosome assembly (GO:0006334);; Molecular Function: protein heterodimerization activity (GO:0046982);;	K11252|5e-35|vvi:100253395|hypothetical protein LOC100253395	Histone H2B.1, embryonic OS=Psammechinus miliaris PE=3 SV=2	PREDICTED: histone H2B.2 [Vitis vinifera]
comp20405_c0	[IQR]	--	Cellular Component: cytosol (GO:0005829);; Biological Process: metabolic process (GO:0008152);; Molecular Function: oxidoreductase activity (GO:0016491);;	K08081|1e-104|vvi:100265103|hypothetical protein LOC100265103	Tropinone reductase homolog At1g07440 OS=Arabidopsis thaliana GN=At1g07440 PE=1 SV=1	tropinone reductase I, partial [Dendrobium nobile]
comp25878_c0	--	--	Molecular Function: nucleotide binding (GO:0000166);; Molecular Function: protein kinase activity (GO:0004672);; Cellular Component: plasma membrane (GO:0005886);; Biological Process: phosphorylation (GO:0016310);; Molecular Function: carbohydrate binding (GO:0030246);;	--	L-type lectin-domain containing receptor kinase VIII.1 OS=Arabidopsis thaliana GN=LECRK81 PE=1 SV=1	PREDICTED: L-type lectin-domain containing receptor kinase VIII.1-like [Fragaria vesca subsp. vesca]
comp24576_c0	--	--	Molecular Function: nucleic acid binding (GO:0003676);; Cellular Component: plastid (GO:0009536);; Molecular Function: metal ion binding (GO:0046872);;	--	Zinc finger protein NUTCRACKER OS=Arabidopsis thaliana GN=NUC PE=2 SV=1	indterminate-like protein, partial [Allium cepa]
comp3584_c0	[E]	Amino acid transport and metabolism	Molecular Function: sequence-specific DNA binding transcription factor activity (GO:0003700);; Molecular Function: N2-acetyl-L-ornithine:2-oxoglutarate 5-aminotransferase activity (GO:0003992);; Molecular Function: copper ion binding (GO:0005507);; Cellular Component: nucleus (GO:0005634);; Cellular Component: mitochondrion (GO:0005739);; Biological Process: regulation of transcription, DNA-templ…	K00818|0.0|vvi:100242776|hypothetical protein LOC100242776	Acetylornithine aminotransferase, mitochondrial OS=Alnus glutinosa GN=AG118 PE=2 SV=1	PREDICTED: acetylornithine aminotransferase, mitochondrial [Vitis vinifera]
comp11429_c0	--	--	Cellular Component: cell part (GO:0044464);;	--	Sec14 cytosolic factor OS=Schizosaccharomyces pombe (strain 972 / ATCC 24843) GN=sec14 PE=4 SV=1	unnamed protein product [Vitis vinifera]
comp2154_c0	--	--	--	--	Fibroin heavy chain OS=Bombyx mori GN=FIBH PE=1 SV=4	PREDICTED: uncharacterized protein LOC100244706 [Vitis vinifera]
comp7255_c0	--	--	Biological Process: metabolic process (GO:0008152);; Biological Process: post-embryonic development (GO:0009791);; Biological Process: single-organism cellular process (GO:0044763);; Biological Process: single-organism developmental process (GO:0044767);; Biological Process: reproductive structure development (GO:0048608);; Biological Process: regulation of biological process (GO:0050789);; Biolo…	--	CWF19-like protein 2 OS=Mus musculus GN=Cwf19l2 PE=2 SV=1	PREDICTED: CWF19-like protein 2-like [Vitis vinifera]
comp564_c0	[C]	Energy production and conversion	Cellular Component: cytosol (GO:0005829);; Biological Process: tricarboxylic acid cycle (GO:0006099);; Molecular Function: phosphoenolpyruvate carboxylase activity (GO:0008964);; Biological Process: carbon fixation (GO:0015977);; Molecular Function: 2-alkenal reductase [NAD(P)] activity (GO:0032440);; Cellular Component: apoplast (GO:0048046);;	K01595|0.0|rcu:RCOM_1177170|Phosphoenolpyruvate carboxylase, putative (EC:1.3.1.74)	Phosphoenolpyruvate carboxylase, housekeeping isozyme OS=Glycine max GN=PPC16 PE=1 SV=1	Phosphoenolpyruvate carboxylase, putative [Ricinus communis]
comp22826_c0	--	--	Molecular Function: hydrolase activity (GO:0016787);;	--	Protein ASPARTIC PROTEASE IN GUARD CELL 2 OS=Arabidopsis thaliana GN=ASPG2 PE=2 SV=1	unknown protein isoform 2 [Lemna minor]
comp8322_c0	--	--	--	--	--	unknown [Lotus japonicus]
comp2967_c0	[J]	Translation, ribosomal structure and biogenesis	Molecular Function: double-stranded RNA binding (GO:0003725);; Cellular Component: mitochondrion (GO:0005739);;	--	YrdC domain-containing protein, mitochondrial OS=Bos taurus GN=YRDC PE=2 SV=1	PREDICTED: yrdC domain-containing protein, mitochondrial-like [Glycine max]
comp23543_c0	--	--	--	K14431|2e-36|rcu:RCOM_1280800|DNA binding protein, putative	Transcription factor TGA6 OS=Arabidopsis thaliana GN=TGA6 PE=1 SV=2	PREDICTED: TGACG-sequence-specific DNA-binding protein TGA-2.1-like [Glycine max]
comp29272_c0	--	--	Cellular Component: intracellular organelle (GO:0043229);; Biological Process: single-organism cellular process (GO:0044763);;	--	65-kDa microtubule-associated protein 3 OS=Arabidopsis thaliana GN=MAP65-3 PE=1 SV=1	PREDICTED: 65-kDa microtubule-associated protein 3 [Vitis vinifera]
comp17642_c0	[O]	Posttranslational modification, protein turnover, chaperones	Molecular Function: serine-type endopeptidase activity (GO:0004252);; Biological Process: proteolysis (GO:0006508);; Cellular Component: chloroplast thylakoid lumen (GO:0009543);; Biological Process: photosystem II repair (GO:0010206);; Molecular Function: oxidoreductase activity (GO:0016491);; Biological Process: mRNA modification (GO:0016556);;	--	Protease Do-like 5, chloroplastic OS=Arabidopsis thaliana GN=DEGP5 PE=1 SV=3	Protease degS, putative isoform 1 [Theobroma cacao]
comp23690_c0	--	--	Cellular Component: integral component of membrane (GO:0016021);;	--	Amino acid permease 3 OS=Arabidopsis thaliana GN=AAP3 PE=1 SV=2	hypothetical protein OsI_04651 [Oryza sativa Indica Group]
comp9635_c0	--	--	Molecular Function: RNA binding (GO:0003723);; Molecular Function: structural constituent of ribosome (GO:0003735);; Biological Process: translation (GO:0006412);; Biological Process: GPI anchor metabolic process (GO:0006505);; Biological Process: intracellular protein transport (GO:0006886);; Molecular Function: O-acyltransferase activity (GO:0008374);; Cellular Component: large ribosomal subuni…	--	--	PREDICTED: uncharacterized protein LOC101301533 [Fragaria vesca subsp. vesca]
comp12475_c0	--	--	--	--	BON1-associated protein 2 OS=Arabidopsis thaliana GN=BAP2 PE=1 SV=1	PREDICTED: BON1-associated protein 2-like [Vitis vinifera]
comp26842_c0	--	--	Cellular Component: mitochondrion (GO:0005739);;	--	Pentatricopeptide repeat-containing protein At4g33990 OS=Arabidopsis thaliana GN=EMB2758 PE=3 SV=2	PREDICTED: pentatricopeptide repeat-containing protein At4g19220, mitochondrial [Vitis vinifera]
comp11745_c0	--	--	Biological Process: nuclear-transcribed mRNA catabolic process (GO:0000956);; Molecular Function: DNA binding (GO:0003677);; Molecular Function: sequence-specific DNA binding transcription factor activity (GO:0003700);; Molecular Function: calmodulin binding (GO:0005516);; Cellular Component: nucleus (GO:0005634);; Biological Process: protein N-linked glycosylation (GO:0006487);; Biological Proce…	--	NAC domain-containing protein 74 OS=Oryza sativa subsp. japonica GN=NAC74 PE=2 SV=1	PREDICTED: uncharacterized protein LOC100838012 [Brachypodium distachyon]
comp1187_c0	[J]	Translation, ribosomal structure and biogenesis	Molecular Function: nucleic acid binding (GO:0003676);; Molecular Function: asparagine-tRNA ligase activity (GO:0004816);; Molecular Function: ATP binding (GO:0005524);; Cellular Component: mitochondrion (GO:0005739);; Biological Process: asparaginyl-tRNA aminoacylation (GO:0006421);; Cellular Component: chloroplast (GO:0009507);; Biological Process: response to cadmium ion (GO:0046686);;	K01893|0.0|osa:4325717|Os01g0372700	Asparagine--tRNA ligase, cytoplasmic 1 OS=Arabidopsis thaliana GN=SYNC1 PE=2 SV=1	Os01g0372700 [Oryza sativa Japonica Group]
comp26233_c0	[RTKL]	--	Molecular Function: protein serine/threonine kinase activity (GO:0004674);; Molecular Function: ATP binding (GO:0005524);; Cellular Component: nucleus (GO:0005634);; Cellular Component: peroxisome (GO:0005777);; Biological Process: protein autophosphorylation (GO:0046777);;	--	Receptor-like cytosolic serine/threonine-protein kinase RBK2 OS=Arabidopsis thaliana GN=RBK2 PE=1 SV=1	PREDICTED: receptor-like cytosolic serine/threonine-protein kinase RBK2-like [Cucumis sativus]
comp10388_c0	--	--	Cellular Component: nucleus (GO:0005634);; Cellular Component: plasma membrane (GO:0005886);; Biological Process: response to high light intensity (GO:0009644);; Molecular Function: magnesium ion transmembrane transporter activity (GO:0015095);; Biological Process: metal ion transport (GO:0030001);; Biological Process: response to hydrogen peroxide (GO:0042542);;	--	Magnesium transporter MRS2-3 OS=Arabidopsis thaliana GN=MRS2-3 PE=1 SV=1	PREDICTED: magnesium transporter MRS2-3-like isoform 2 [Vitis vinifera]
comp15026_c0	--	--	Cellular Component: membrane (GO:0016020);; Biological Process: response to stimulus (GO:0050896);;	--	MLO-like protein 8 OS=Arabidopsis thaliana GN=MLO8 PE=2 SV=2	PREDICTED: MLO-like protein 8-like [Cucumis sativus]
comp7909_c0	--	--	--	--	Uncharacterized protein DKFZp434B061 OS=Homo sapiens PE=2 SV=2	PREDICTED: uncharacterized protein LOC100257657 [Vitis vinifera]
comp1815_c0	--	--	--	--	Sarcoplasmic reticulum histidine-rich calcium-binding protein OS=Oryctolagus cuniculus GN=HRC PE=1 SV=1	PREDICTED: uncharacterized protein LOC100250797 isoform 1 [Vitis vinifera]
comp22156_c0	--	--	--	--	Putative pentatricopeptide repeat-containing protein At1g68930 OS=Arabidopsis thaliana GN=PCMP-H22 PE=3 SV=1	Pentatricopeptide repeat-containing protein [Medicago truncatula]
comp4773_c0	[G]	Carbohydrate transport and metabolism	Molecular Function: alpha-amylase activity (GO:0004556);; Molecular Function: calcium ion binding (GO:0005509);; Cellular Component: extracellular region (GO:0005576);; Biological Process: carbohydrate metabolic process (GO:0005975);; Molecular Function: glucan 1,4-alpha-maltotetraohydrolase activity (GO:0033910);;	--	Probable alpha-amylase 2 OS=Arabidopsis thaliana GN=AMY2 PE=2 SV=1	hypothetical protein SORBIDRAFT_06g015110 [Sorghum bicolor]
comp34960_c0	--	--	--	--	--	hypothetical protein OsJ_20530 [Oryza sativa Japonica Group]
comp148_c0	[E]	Amino acid transport and metabolism	Cellular Component: mitochondrion (GO:0005739);; Cellular Component: cytosol (GO:0005829);; Biological Process: gluconeogenesis (GO:0006094);; Biological Process: glycolysis (GO:0006096);; Molecular Function: 1-aminocyclopropane-1-carboxylate deaminase activity (GO:0008660);; Cellular Component: chloroplast (GO:0009507);; Biological Process: response to salt stress (GO:0009651);; Biological Proce…	--	Putative 1-aminocyclopropane-1-carboxylate deaminase OS=Pyrococcus abyssi (strain GE5 / Orsay) GN=PYRAB00630 PE=3 SV=1	PREDICTED: putative 1-aminocyclopropane-1-carboxylate deaminase-like [Brachypodium distachyon]
comp25867_c0	[Q]	Secondary metabolites biosynthesis, transport and catabolism	Molecular Function: iron ion binding (GO:0005506);; Molecular Function: electron carrier activity (GO:0009055);; Biological Process: response to red light (GO:0010114);; Molecular Function: (+)-abscisic acid 8'-hydroxylase activity (GO:0010295);; Cellular Component: integral component of membrane (GO:0016021);; Cellular Component: cytoplasmic membrane-bounded vesicle (GO:0016023);; Molecular Func…	K09843|1e-168|vvi:100246968|hypothetical protein LOC100246968	Abscisic acid 8&apos;-hydroxylase 3 OS=Oryza sativa subsp. japonica GN=CYP707A7 PE=2 SV=1	ABA 8&apos;-hydroxylase 2, partial [Gladiolus hybrid cultivar]
comp12791_c0	--	--	--	--	BTB/POZ domain-containing protein At1g55760 OS=Arabidopsis thaliana GN=At1g55760 PE=2 SV=1	BTB/POZ domain-containing protein [Theobroma cacao]
comp14055_c0	[J]	Translation, ribosomal structure and biogenesis	Molecular Function: RNA binding (GO:0003723);; Biological Process: regulation of transcription, DNA-templated (GO:0006355);; Biological Process: tRNA metabolic process (GO:0006399);; Molecular Function: rRNA methyltransferase activity (GO:0008649);; Cellular Component: plastid (GO:0009536);; Biological Process: chloroplast organization (GO:0009658);; Biological Process: rRNA methylation (GO:00311…	K03500|0.0|vvi:100253242|hypothetical protein LOC100253242	Ribosomal RNA small subunit methyltransferase B OS=Bacillus subtilis (strain 168) GN=rsmB PE=3 SV=2	PREDICTED: ribosomal RNA small subunit methyltransferase B [Vitis vinifera]
comp6381_c0	--	--	--	--	--	amino acid feature: rod protein domain, aa 266 .. 468; amino acid feature: globular protein domain, aa 32 .. 265 [Chlamydomonas reinhardtii]
comp14147_c0	--	--	Molecular Function: binding (GO:0005488);; Cellular Component: membrane (GO:0016020);; Molecular Function: oxidoreductase activity (GO:0016491);; Cellular Component: intracellular membrane-bounded organelle (GO:0043231);;	--	Cytochrome P450 71A1 OS=Persea americana GN=CYP71A1 PE=1 SV=2	P450 [Elaeis guineensis]
comp4635_c0	[O]	Posttranslational modification, protein turnover, chaperones	--	--	Probable ubiquitin-conjugating enzyme E2 25 OS=Arabidopsis thaliana GN=UBC25 PE=2 SV=1	PREDICTED: probable ubiquitin-conjugating enzyme E2 25-like [Brachypodium distachyon]
comp3129_c0	[MG]	--	Molecular Function: nucleotide binding (GO:0000166);; Biological Process: alternative mRNA splicing, via spliceosome (GO:0000380);; Molecular Function: RNA binding (GO:0003723);; Molecular Function: protein kinase activity (GO:0004672);; Cellular Component: cell wall (GO:0005618);; Cellular Component: nucleolus (GO:0005730);; Cellular Component: peroxisome (GO:0005777);; Cellular Component: Golgi…	K09753|1e-180|vvi:100251623|hypothetical protein LOC100251623	Cinnamoyl-CoA reductase 1 OS=Arabidopsis thaliana GN=CCR1 PE=1 SV=1	cinnamoyl-CoA reductase [Hibiscus cannabinus]
comp14093_c0	--	--	Molecular Function: oxidoreductase activity (GO:0016491);;	K10768|1e-109|vvi:100252488|hypothetical protein LOC100252488	Alpha-ketoglutarate-dependent dioxygenase alkB homolog 6 OS=Xenopus laevis GN=alkbh6 PE=2 SV=1	PREDICTED: probable alpha-ketoglutarate-dependent dioxygenase ABH6 [Vitis vinifera]
comp6236_c0	[R]	General function prediction only	Cellular Component: cytoplasm (GO:0005737);; Molecular Function: N-acetyltransferase activity (GO:0008080);; Biological Process: metabolic process (GO:0008152);;	--	N-alpha-acetyltransferase 50 OS=Xenopus tropicalis GN=naa50 PE=2 SV=1	Acyl-CoA N-acyltransferases (NAT) superfamily protein [Theobroma cacao]
comp20800_c0	--	--	Cellular Component: intracellular organelle (GO:0043229);;	--	--	Os05g0397900 [Oryza sativa Japonica Group]
comp9334_c0	--	--	Molecular Function: DNA binding (GO:0003677);; Molecular Function: zinc ion binding (GO:0008270);;	--	Zinc finger A20 and AN1 domain-containing stress-associated protein 4 OS=Arabidopsis thaliana GN=SAP4 PE=1 SV=1	hypothetical protein M569_12860, partial [Genlisea aurea]
comp5624_c0	[J]	Translation, ribosomal structure and biogenesis	Molecular Function: structural constituent of ribosome (GO:0003735);; Cellular Component: mitochondrial large ribosomal subunit (GO:0005762);; Biological Process: DNA-templated transcription, elongation (GO:0006354);; Biological Process: translation (GO:0006412);; Biological Process: ubiquitin-dependent protein catabolic process (GO:0006511);; Cellular Component: chloroplast (GO:0009507);; Biolog…	--	60S ribosomal protein L2, mitochondrial OS=Oryza sativa subsp. japonica GN=RPL2 PE=2 SV=2	RecName: Full=60S ribosomal protein L2, mitochondrial
comp7536_c0	[K]	Transcription	Molecular Function: DNA binding (GO:0003677);; Cellular Component: chromatin silencing complex (GO:0005677);; Biological Process: chromatin silencing (GO:0006342);; Biological Process: protein deacetylation (GO:0006476);; Molecular Function: zinc ion binding (GO:0008270);; Molecular Function: hydrolase activity (GO:0016787);; Molecular Function: NAD+ binding (GO:0070403);;	K11416|4e-77|zma:542568|cl3393_1, hda113	NAD-dependent protein deacetylase SRT1 OS=Oryza sativa subsp. indica GN=SRT1 PE=2 SV=1	PREDICTED: NAD-dependent protein deacetylase SRT1-like [Setaria italica]
comp2197_c0	[E]	Amino acid transport and metabolism	Molecular Function: serine-type carboxypeptidase activity (GO:0004185);; Cellular Component: extracellular region (GO:0005576);; Biological Process: proteolysis (GO:0006508);; Cellular Component: cytoplasmic membrane-bounded vesicle (GO:0016023);;	--	Serine carboxypeptidase-like 35 OS=Arabidopsis thaliana GN=SCPL35 PE=2 SV=1	predicted protein [Hordeum vulgare subsp. vulgare]
comp17511_c0	[M]	Cell wall/membrane/envelope biogenesis	Cellular Component: plasma membrane (GO:0005886);; Biological Process: protein glycosylation (GO:0006486);; Biological Process: lipid metabolic process (GO:0006629);; Molecular Function: P-P-bond-hydrolysis-driven protein transmembrane transporter activity (GO:0015450);; Molecular Function: phosphotransferase activity, for other substituted phosphate groups (GO:0016780);; Cellular Component: ribo…	--	Phospho-N-acetylmuramoyl-pentapeptide-transferase homolog OS=Arabidopsis thaliana GN=ATTRANS 11 PE=2 SV=3	PREDICTED: phospho-N-acetylmuramoyl-pentapeptide-transferase homolog [Vitis vinifera]
comp8640_c0	[R]	General function prediction only	Cellular Component: cytoplasm (GO:0005737);; Cellular Component: plasma membrane (GO:0005886);; Molecular Function: polyneuridine-aldehyde esterase activity (GO:0050529);;	--	Putative methylesterase 14, chloroplastic OS=Arabidopsis thaliana GN=MES14 PE=1 SV=1	predicted protein [Populus trichocarpa]
comp34864_c0	--	--	--	K01115|1e-09|vcn:VOLCADRAFT_99471|hypothetical protein	Formin-like protein 5 OS=Oryza sativa subsp. japonica GN=FH5 PE=2 SV=2	PREDICTED: proline-rich receptor-like protein kinase PERK8-like [Fragaria vesca subsp. vesca]
comp12899_c0	--	--	Molecular Function: phosphoglycerate mutase activity (GO:0004619);; Cellular Component: cytoplasm (GO:0005737);; Biological Process: glycolysis (GO:0006096);; Biological Process: response to stress (GO:0006950);; Molecular Function: manganese ion binding (GO:0030145);;	K01834|2e-13|vvi:100245007|putative 2,3-bisphosphoglycerate-independent phosphoglycerate mutase	2,3-bisphosphoglycerate-independent phosphoglycerate mutase (Fragment) OS=Prunus dulcis PE=2 SV=1	putative phosphoglycerate mutase protein, partial [Elaeis guineensis]
comp4630_c0	--	--	Molecular Function: GTPase activity (GO:0003924);; Molecular Function: structural constituent of cytoskeleton (GO:0005200);; Molecular Function: GTP binding (GO:0005525);; Cellular Component: cytoplasm (GO:0005737);; Cellular Component: microtubule (GO:0005874);; Biological Process: GTP catabolic process (GO:0006184);; Biological Process: microtubule-based process (GO:0007017);; Biological Proces…	--	Tubulin beta-3 chain OS=Zea mays GN=TUBB3 PE=2 SV=1	PREDICTED: tubulin beta-1 chain-like [Cucumis sativus]
comp18102_c0	[K]	Transcription	Molecular Function: DNA binding (GO:0003677);; Biological Process: transcription, DNA-templated (GO:0006351);;	--	Homeobox-leucine zipper protein HOX11 OS=Oryza sativa subsp. japonica GN=HOX11 PE=2 SV=1	Homeobox from [Theobroma cacao]
comp276_c0	[J]	Translation, ribosomal structure and biogenesis	Biological Process: RNA methylation (GO:0001510);; Molecular Function: structural constituent of ribosome (GO:0003735);; Cellular Component: cell wall (GO:0005618);; Cellular Component: mitochondrion (GO:0005739);; Cellular Component: vacuolar membrane (GO:0005774);; Cellular Component: Golgi apparatus (GO:0005794);; Cellular Component: plasma membrane (GO:0005886);; Biological Process: translati…	--	40S ribosomal protein S15a OS=Daucus carota GN=RPS15A PE=2 SV=3	unnamed protein product [Vitis vinifera]
comp6902_c0	--	--	--	--	Chitinase-like protein PB1E7.04c OS=Schizosaccharomyces pombe (strain 972 / ATCC 24843) GN=SPAPB1E7.04c PE=3 SV=1	Uncharacterized protein isoform 1 [Theobroma cacao]
comp32717_c0	--	--	--	--	--	unnamed protein product [Vitis vinifera]
comp29047_c0	--	--	--	--	Zinc finger protein ZAT7 OS=Arabidopsis thaliana GN=ZAT7 PE=2 SV=1	C2H2-type zinc finger protein 2 [Eucalyptus grandis]
comp5343_c0	--	--	Biological Process: cell differentiation (GO:0030154);; Biological Process: auxin transport (GO:0060918);;	--	Pollen-specific protein SF21 OS=Helianthus annuus GN=SF21 PE=2 SV=1	PREDICTED: pollen-specific protein SF21-like [Fragaria vesca subsp. vesca]
comp3533_c0	--	--	--	--	--	PREDICTED: uncharacterized protein LOC100853355 [Vitis vinifera]
comp34428_c0	[C]	Energy production and conversion	Molecular Function: cytochrome-c oxidase activity (GO:0004129);; Cellular Component: mitochondrion (GO:0005739);; Cellular Component: integral component of membrane (GO:0016021);; Biological Process: aerobic electron transport chain (GO:0019646);;	K02262|2e-49|ppp:PhpafMp26|cox3	Cytochrome c oxidase subunit 3 OS=Felis catus GN=MT-CO3 PE=3 SV=1	cytochrome c oxidase subunit 3 [Rhodomonas salina]
comp21717_c0	--	--	Molecular Function: binding (GO:0005488);;	--	Zinc finger CCCH domain-containing protein 6 OS=Oryza sativa subsp. japonica GN=Os01g0258700 PE=2 SV=2	PREDICTED: zinc finger CCCH domain-containing protein 34-like [Cicer arietinum]
comp14028_c0	[D]	Cell cycle control, cell division, chromosome partitioning	Biological Process: response to chemical (GO:0042221);;	K09422|2e-19|pop:POPTR_825568|MYB083	Serine/arginine repetitive matrix protein 1 OS=Mus musculus GN=Srrm1 PE=1 SV=2	Myb domain protein 106 [Theobroma cacao]
comp24179_c0	[L]	Replication, recombination and repair	Cellular Component: nuclear chromosome (GO:0000228);; Molecular Function: loop DNA binding (GO:0000404);; Biological Process: meiotic mismatch repair (GO:0000710);; Molecular Function: damaged DNA binding (GO:0003684);; Molecular Function: protein binding (GO:0005515);; Biological Process: ATP catabolic process (GO:0006200);; Biological Process: synapsis (GO:0007129);; Biological Process: recipro…	K08736|5e-86|vvi:100266933|hypothetical protein LOC100266933	DNA mismatch repair protein MSH3 OS=Arabidopsis thaliana GN=MSH3 PE=1 SV=2	PREDICTED: DNA mismatch repair protein Msh3-like [Vitis vinifera]
comp980_c0	--	--	Biological Process: formation of translation preinitiation complex (GO:0001731);; Molecular Function: translation initiation factor activity (GO:0003743);; Cellular Component: eukaryotic translation initiation factor 3 complex (GO:0005852);; Biological Process: regulation of translational initiation (GO:0006446);; Cellular Component: eukaryotic 43S preinitiation complex (GO:0016282);; Molecular F…	K03252|0.0|vvi:100252123|hypothetical protein LOC100252123	Eukaryotic translation initiation factor 3 subunit C OS=Medicago truncatula GN=TIF3C1 PE=2 SV=1	PREDICTED: eukaryotic translation initiation factor 3 subunit C-like [Vitis vinifera]
comp41283_c0	--	--	Molecular Function: monooxygenase activity (GO:0004497);; Molecular Function: oxidoreductase activity, acting on paired donors, with incorporation or reduction of molecular oxygen (GO:0016705);; Molecular Function: metal ion binding (GO:0046872);;	--	Cytochrome P450 82A3 OS=Glycine max GN=CYP82A3 PE=2 SV=1	cytochrome P450 [Populus trichocarpa]
comp13828_c0	--	--	--	--	Histone-lysine N-methyltransferase, H3 lysine-9 specific SUVH6 OS=Arabidopsis thaliana GN=SUVH6 PE=2 SV=2	PREDICTED: uncharacterized protein LOC100242100 [Vitis vinifera]
comp8660_c0	[R]	General function prediction only	Molecular Function: histone acetyltransferase activity (GO:0004402);; Cellular Component: nucleus (GO:0005634);; Biological Process: histone acetylation (GO:0016573);;	K10752|1e-130|rcu:RCOM_0312320|WD-repeat protein, putative (EC:2.3.1.48)	WD-40 repeat-containing protein MSI5 OS=Arabidopsis thaliana GN=MSI5 PE=2 SV=2	FVE [x Doritaenopsis hybrid cultivar]
comp801_c0	--	--	Cellular Component: plasma membrane (GO:0005886);; Biological Process: megasporogenesis (GO:0009554);;	--	CYSTM1 family protein A OS=Arabidopsis thaliana GN=At2g41420 PE=3 SV=1	unknown [Picea sitchensis]
comp19445_c0	[E]	Amino acid transport and metabolism	Biological Process: amino acid transmembrane transport (GO:0003333);; Molecular Function: L-glutamate transmembrane transporter activity (GO:0005313);; Cellular Component: mitochondrion (GO:0005739);; Molecular Function: L-alanine transmembrane transporter activity (GO:0015180);; Molecular Function: arginine transmembrane transporter activity (GO:0015181);; Molecular Function: gamma-aminobutyric …	--	Amino-acid permease BAT1 homolog OS=Oryza sativa subsp. japonica GN=BAT1 PE=2 SV=1	unnamed protein product [Vitis vinifera]
comp8817_c0	--	--	Molecular Function: protein binding (GO:0005515);; Cellular Component: nucleus (GO:0005634);; Cellular Component: cytosol (GO:0005829);; Biological Process: defense response (GO:0006952);; Biological Process: cell death (GO:0008219);; Biological Process: ethylene biosynthetic process (GO:0009693);; Biological Process: leaf senescence (GO:0010150);; Molecular Function: AU-rich element binding (GO:…	--	Cell wall protein DAN4 OS=Saccharomyces cerevisiae (strain ATCC 204508 / S288c) GN=DAN4 PE=2 SV=1	PREDICTED: uncharacterized protein LOC100258161 isoform 1 [Vitis vinifera]
comp2562_c0	--	--	Cellular Component: vacuole (GO:0005773);; Cellular Component: cytoplasmic membrane-bounded vesicle (GO:0016023);;	--	Fasciclin-like arabinogalactan protein 17 OS=Arabidopsis thaliana GN=FLA17 PE=2 SV=1	PREDICTED: fasciclin-like arabinogalactan protein 17 [Vitis vinifera]
comp6561_c0	--	--	--	--	--	Uncharacterized protein TCM_006891 [Theobroma cacao]
comp9592_c0	--	--	Cellular Component: mitochondrion (GO:0005739);;	K12593|8e-52|vvi:100267367|hypothetical protein LOC100267367	--	PREDICTED: uncharacterized protein LOC100267367 [Vitis vinifera]
comp8289_c0	--	--	Molecular Function: DNA binding (GO:0003677);; Molecular Function: chromatin binding (GO:0003682);; Biological Process: response to salt stress (GO:0009651);; Biological Process: response to ethylene (GO:0009723);; Biological Process: response to auxin (GO:0009733);; Biological Process: response to abscisic acid (GO:0009737);; Biological Process: response to gibberellin (GO:0009739);; Biological …	--	Transcription factor ASG4 OS=Arabidopsis thaliana GN=ASG4 PE=2 SV=1	transcription factor 1R-MYB1 [Chimonanthus praecox]
comp16517_c0	--	--	Molecular Function: iron ion binding (GO:0005506);; Molecular Function: electron carrier activity (GO:0009055);; Molecular Function: heme binding (GO:0020037);; Molecular Function: taxane 13-alpha-hydroxylase activity (GO:0050598);; Biological Process: oxidation-reduction process (GO:0055114);;	--	--	PREDICTED: cytochrome P450 716B1-like [Fragaria vesca subsp. vesca]
comp493_c0	--	--	--	--	Serine/arginine repetitive matrix protein 1 OS=Mus musculus GN=Srrm1 PE=1 SV=2	hypothetical protein M569_17305 [Genlisea aurea]
comp2920_c0	[S]	Function unknown	Biological Process: karyogamy (GO:0000741);; Cellular Component: nucleolus (GO:0005730);; Biological Process: rRNA processing (GO:0006364);; Biological Process: embryo sac egg cell differentiation (GO:0009560);; Cellular Component: small-subunit processome (GO:0032040);;	--	Probable U3 small nucleolar RNA-associated protein 11 OS=Oryza sativa subsp. japonica GN=Os01g0810000 PE=2 SV=2	hypothetical protein VITISV_023155 [Vitis vinifera]
comp12206_c0	--	--	Biological Process: rRNA processing (GO:0006364);; Biological Process: thylakoid membrane organization (GO:0010027);; Biological Process: cytochrome b6f complex assembly (GO:0010190);; Biological Process: photosystem II assembly (GO:0010207);; Cellular Component: membrane (GO:0016020);; Biological Process: isopentenyl diphosphate biosynthetic process, methylerythritol 4-phosphate pathway (GO:0019…	--	Vegetative cell wall protein gp1 OS=Chlamydomonas reinhardtii GN=GP1 PE=2 SV=1	conserved hypothetical protein [Ricinus communis]
comp15039_c0	--	--	Molecular Function: catalytic activity (GO:0003824);;	--	U-box domain-containing protein 33 OS=Arabidopsis thaliana GN=PUB33 PE=2 SV=2	predicted protein [Populus trichocarpa]
comp20779_c0	--	--	Molecular Function: ATP binding (GO:0005524);; Cellular Component: chloroplast stroma (GO:0009570);; Molecular Function: nucleoside-triphosphatase activity (GO:0017111);;	--	Protein ycf2 OS=Lemna minor GN=ycf2-A PE=3 SV=1	Ycf2 [Lemna minor]
comp13659_c0	[J]	Translation, ribosomal structure and biogenesis	Molecular Function: copper ion binding (GO:0005507);; Biological Process: translation (GO:0006412);; Molecular Function: methyltransferase activity (GO:0008168);; Biological Process: methylation (GO:0032259);;	--	Methyltransferase-like protein 17, mitochondrial OS=Mus musculus GN=Mettl17 PE=2 SV=2	predicted protein [Hordeum vulgare subsp. vulgare]
comp19114_c0	--	--	--	--	Uncharacterized protein DKFZp434B061 OS=Homo sapiens PE=2 SV=2	hypothetical protein EMIHUDRAFT_461858, partial [Emiliania huxleyi CCMP1516]
comp28666_c0	[D]	Cell cycle control, cell division, chromosome partitioning	Biological Process: response to red or far red light (GO:0009639);; Biological Process: negative gravitropism (GO:0009959);; Biological Process: single-organism developmental process (GO:0044767);; Biological Process: organ development (GO:0048513);;	--	Formin-like protein 14 OS=Arabidopsis thaliana GN=FH14 PE=3 SV=3	PREDICTED: uncharacterized protein LOC100265690 [Vitis vinifera]
comp21096_c0	--	--	Molecular Function: nucleotide binding (GO:0000166);; Molecular Function: kinase activity (GO:0016301);; Molecular Function: phosphotransferase activity, alcohol group as acceptor (GO:0016773);; Biological Process: primary metabolic process (GO:0044238);; Biological Process: cellular macromolecule metabolic process (GO:0044260);;	--	Transposon TX1 uncharacterized 149 kDa protein OS=Xenopus laevis PE=4 SV=1	hypothetical protein VITISV_017664 [Vitis vinifera]
comp15978_c0	--	--	Molecular Function: hydrolase activity (GO:0016787);;	--	Uncharacterized protein DDB_G0271670 OS=Dictyostelium discoideum GN=DDB_G0271670 PE=4 SV=1	hypothetical protein CMQ_2906 [Grosmannia clavigera kw1407]
comp5560_c0	--	--	Cellular Component: intracellular membrane-bounded organelle (GO:0043231);; Cellular Component: membrane part (GO:0044425);; Cellular Component: cytoplasmic part (GO:0044444);;	--	Outer envelope pore protein 16-3, chloroplastic/mitochondrial OS=Arabidopsis thaliana GN=OEP163 PE=1 SV=1	hypothetical protein SORBIDRAFT_04g029860 [Sorghum bicolor]
comp31014_c0	--	--	Molecular Function: transferase activity, transferring phosphorus-containing groups (GO:0016772);; Biological Process: primary metabolic process (GO:0044238);; Biological Process: cellular macromolecule metabolic process (GO:0044260);; Molecular Function: organic cyclic compound binding (GO:0097159);; Molecular Function: heterocyclic compound binding (GO:1901363);;	--	--	hypothetical protein VITISV_035958 [Vitis vinifera]
comp29442_c0	--	--	Molecular Function: actin binding (GO:0003779);; Biological Process: amino acid transport (GO:0006865);; Biological Process: response to organic substance (GO:0010033);; Cellular Component: membrane (GO:0016020);; Biological Process: actin cytoskeleton organization (GO:0030036);; Biological Process: cellular metabolic process (GO:0044237);; Biological Process: single-organism metabolic process (G…	--	Formin-like protein 16 OS=Oryza sativa subsp. japonica GN=FH16 PE=2 SV=1	hypothetical protein PRUPE_ppa026144mg [Prunus persica]
comp34616_c0	--	--	Cellular Component: nucleus (GO:0005634);; Cellular Component: chloroplast (GO:0009507);;	--	Translation initiation factor IF-2 OS=Mycobacterium abscessus (strain ATCC 19977 / DSM 44196) GN=infB PE=3 SV=1	PREDICTED: uncharacterized protein LOC100794844 [Glycine max]
comp7602_c0	--	--	Cellular Component: nucleus (GO:0005634);; Biological Process: positive regulation of seed germination (GO:0010030);; Molecular Function: transferase activity, transferring acyl groups (GO:0016746);;	--	Transcription factor GTE6 OS=Arabidopsis thaliana GN=GTE6 PE=2 SV=1	PREDICTED: transcription factor GTE1-like [Cucumis sativus]
comp10574_c0	[G]	Carbohydrate transport and metabolism	Molecular Function: xylulokinase activity (GO:0004856);; Biological Process: carbohydrate metabolic process (GO:0005975);; Cellular Component: chloroplast (GO:0009507);; Biological Process: phosphorylation (GO:0016310);;	--	D-xylulose kinase OS=Staphylococcus epidermidis (strain ATCC 35984 / RP62A) GN=xylB PE=3 SV=1	hypothetical protein VITISV_005731 [Vitis vinifera]
comp13731_c0	--	--	Molecular Function: transporter activity (GO:0005215);; Biological Process: oligopeptide transport (GO:0006857);; Cellular Component: membrane (GO:0016020);;	--	Peptide transporter PTR2 OS=Arabidopsis thaliana GN=PTR2 PE=1 SV=1	PREDICTED: peptide transporter PTR2-like [Brachypodium distachyon]
comp9216_c0	--	--	Cellular Component: plastid (GO:0009536);;	--	--	hypothetical protein ZEAMMB73_499073 [Zea mays]
comp10563_c0	[R]	General function prediction only	Molecular Function: RNA binding (GO:0003723);; Molecular Function: GTP binding (GO:0005525);; Cellular Component: mitochondrion (GO:0005739);; Cellular Component: cytosol (GO:0005829);; Biological Process: endocytosis (GO:0006897);; Cellular Component: chloroplast (GO:0009507);;	--	GTP-binding protein ERG OS=Arabidopsis thaliana GN=ERG PE=1 SV=2	unknown [Zea mays]
comp7381_c0	--	--	--	--	--	PREDICTED: uncharacterized protein LOC100263969 [Vitis vinifera]
comp38792_c0	--	--	--	--	Pentatricopeptide repeat-containing protein At2g33760 OS=Arabidopsis thaliana GN=PCMP-H6 PE=3 SV=1	Tetratricopeptide repeat-like superfamily protein, putative [Theobroma cacao]
comp11171_c0	--	--	Cellular Component: plasma membrane (GO:0005886);; Cellular Component: integral component of membrane (GO:0016021);; Biological Process: transmembrane transport (GO:0055085);;	--	Mitochondrial substrate carrier family protein B OS=Dictyostelium discoideum GN=mcfB PE=3 SV=1	unknown [Zea mays]
comp10068_c0	[K]	Transcription	Biological Process: RNA splicing, via endonucleolytic cleavage and ligation (GO:0000394);; Molecular Function: translation initiation factor activity (GO:0003743);; Cellular Component: transcription factor TFIIA complex (GO:0005672);; Biological Process: regulation of transcription, DNA-templated (GO:0006355);; Biological Process: transcription initiation from RNA polymerase II promoter (GO:00063…	K03123|1e-55|rcu:RCOM_0482790|transcription initiation factor iia (tfiia), gamma chain, putative	Transcription initiation factor IIA subunit 2 OS=Arabidopsis thaliana GN=TFIIA-S PE=2 SV=2	transcription initiation factor iia (tfiia), gamma chain, putative [Ricinus communis]
comp992_c0	[RTKL]	--	Molecular Function: calmodulin-dependent protein kinase activity (GO:0004683);; Molecular Function: ATP binding (GO:0005524);; Biological Process: protein phosphorylation (GO:0006468);; Biological Process: signal transduction (GO:0007165);;	--	CBL-interacting protein kinase 2 OS=Oryza sativa subsp. japonica GN=CIPK2 PE=2 SV=1	serine-threonine kinase [Persea americana]
comp83_c0	--	--	Molecular Function: cysteine-type endopeptidase activity (GO:0004197);; Cellular Component: vacuole (GO:0005773);; Biological Process: proteolysis (GO:0006508);; Biological Process: aging (GO:0007568);; Biological Process: response to ethylene (GO:0009723);; Cellular Component: cytoplasmic membrane-bounded vesicle (GO:0016023);;	K01366|0.0|osa:4347180|Os09g0442300	Oryzain gamma chain OS=Oryza sativa subsp. japonica GN=Os09g0442300 PE=2 SV=2	cysteine proteinase [Elaeis guineensis]
comp9502_c0	[RTKL]	--	Biological Process: activation of MAPKK activity (GO:0000186);; Molecular Function: MAP kinase kinase kinase activity (GO:0004709);; Molecular Function: ATP binding (GO:0005524);; Cellular Component: nucleus (GO:0005634);; Cellular Component: plasma membrane (GO:0005886);;	--	Serine/threonine-protein kinase fray2 OS=Dictyostelium discoideum GN=fray2 PE=3 SV=1	serine/threonine protein kinase, putative [Ricinus communis]
comp3883_c0	[R]	General function prediction only	Molecular Function: nucleic acid binding (GO:0003676);; Cellular Component: nucleoplasm (GO:0005654);; Biological Process: RNA splicing (GO:0008380);; Cellular Component: plastid (GO:0009536);;	K14325|0.0|pop:POPTR_823076|hypothetical protein	Arginine/serine-rich protein 45 OS=Arabidopsis thaliana GN=SR45 PE=1 SV=1	unknown [Populus trichocarpa]
comp9164_c0	--	--	Cellular Component: mitochondrial intermembrane space (GO:0005758);; Biological Process: copper ion transport (GO:0006825);; Molecular Function: copper chaperone activity (GO:0016531);;	--	Serine/arginine repetitive matrix protein 1 OS=Gallus gallus GN=SRRM1 PE=2 SV=1	PREDICTED: uncharacterized protein LOC101222658 [Cucumis sativus]
comp28346_c0	--	--	Molecular Function: binding (GO:0005488);;	--	Retrovirus-related Pol polyprotein from transposon TNT 1-94 OS=Nicotiana tabacum PE=2 SV=1	polyprotein [Citrus sinensis]
comp1748_c0	--	--	Molecular Function: protein serine/threonine kinase activity (GO:0004674);; Molecular Function: ATP binding (GO:0005524);; Cellular Component: nucleus (GO:0005634);; Biological Process: protein phosphorylation (GO:0006468);; Biological Process: response to salt stress (GO:0009651);;	K14498|6e-35|pop:POPTR_665248|hypothetical protein	Serine/threonine-protein kinase SRK2H OS=Arabidopsis thaliana GN=SRK2H PE=1 SV=1	unknown [Glycine max]
comp14866_c0	[R]	General function prediction only	Cellular Component: plasma membrane (GO:0005886);; Cellular Component: chloroplast membrane (GO:0031969);;	--	Rhomboid protease GluP OS=Bacillus subtilis (strain 168) GN=gluP PE=1 SV=2	KOM, putative [Ricinus communis]
comp41969_c0	--	--	Cellular Component: extracellular region (GO:0005576);; Biological Process: lipid metabolic process (GO:0006629);;	--	GDSL esterase/lipase At2g04570 OS=Arabidopsis thaliana GN=At2g04570 PE=2 SV=1	unknown [Medicago truncatula]
comp33183_c0	[K]	Transcription	Molecular Function: DNA binding (GO:0003677);; Biological Process: transcription, DNA-templated (GO:0006351);;	--	Homeobox-leucine zipper protein ROC3 OS=Oryza sativa subsp. indica GN=ROC3 PE=2 SV=2	PREDICTED: homeobox-leucine zipper protein ROC3 [Vitis vinifera]
comp20836_c0	--	--	Cellular Component: mitochondrion (GO:0005739);; Biological Process: heat acclimation (GO:0010286);;	--	--	unknown [Arabidopsis thaliana]
comp8309_c0	--	--	Molecular Function: organic cyclic compound binding (GO:0097159);; Molecular Function: heterocyclic compound binding (GO:1901363);;	--	--	TIR-NBS-LRR type disease resistance protein [Arachis hypogaea]
comp15758_c0	[L]	Replication, recombination and repair	Cellular Component: nucleus (GO:0005634);; Biological Process: DNA replication (GO:0006260);; Biological Process: DNA recombination (GO:0006310);; Biological Process: photomorphogenesis (GO:0009640);; Biological Process: regulation of gene expression (GO:0010468);; Molecular Function: transferase activity (GO:0016740);; Molecular Function: hydrolase activity (GO:0016787);; Molecular Function: org…	K02349|0.0|ath:AT4G32700|DNA-directed DNA polymerase family protein	DNA polymerase theta OS=Homo sapiens GN=POLQ PE=1 SV=2	unnamed protein product [Vitis vinifera]
comp10524_c0	--	--	Cellular Component: nucleus (GO:0005634);; Cellular Component: spindle (GO:0005819);; Cellular Component: phragmoplast (GO:0009524);; Biological Process: spindle assembly (GO:0051225);; Cellular Component: HAUS complex (GO:0070652);; Biological Process: phragmoplast microtubule organization (GO:0080175);;	--	HAUS augmin-like complex subunit 3 OS=Xenopus laevis GN=haus3 PE=2 SV=1	Gb:AAB97010.1 isoform 1 [Theobroma cacao]
comp1577_c0	[U]	Intracellular trafficking, secretion, and vesicular transport	Cellular Component: mitochondrion (GO:0005739);; Biological Process: protein retention in ER lumen (GO:0006621);; Cellular Component: integral component of membrane (GO:0016021);; Molecular Function: ER retention sequence binding (GO:0046923);;	--	Putative ER lumen protein retaining receptor C28H8.4 OS=Caenorhabditis elegans GN=C28H8.4 PE=3 SV=1	PREDICTED: ER lumen protein retaining receptor-like [Cucumis sativus]
comp13425_c0	--	--	--	--	Protein WAVE-DAMPENED 2 OS=Arabidopsis thaliana GN=WVD2 PE=2 SV=1	unnamed protein product [Vitis vinifera]
comp21514_c0	--	--	Biological Process: mRNA modification (GO:0016556);;	--	Pentatricopeptide repeat-containing protein At5g48910 OS=Arabidopsis thaliana GN=PCMP-H38 PE=2 SV=1	PREDICTED: pentatricopeptide repeat-containing protein At5g48910-like [Cucumis sativus]
comp17238_c0	--	--	Molecular Function: oxidoreductase activity, acting on single donors with incorporation of molecular oxygen, incorporation of two atoms of oxygen (GO:0016702);; Molecular Function: lyase activity (GO:0016829);;	--	--	PREDICTED: uncharacterized protein LOC100854951 [Vitis vinifera]
comp2869_c0	[P]	Inorganic ion transport and metabolism	Molecular Function: DNA binding (GO:0003677);; Molecular Function: copper ion binding (GO:0005507);; Biological Process: glycolysis (GO:0006096);; Biological Process: regulation of DNA replication (GO:0006275);; Biological Process: water transport (GO:0006833);; Biological Process: hyperosmotic response (GO:0006972);; Biological Process: Golgi organization (GO:0007030);; Biological Process: respo…	K00392|0.0|rcu:RCOM_1577810|Sulfite reductase [ferredoxin], putative (EC:1.8.7.1)	Sulfite reductase 1 [ferredoxin], chloroplastic OS=Nicotiana tabacum GN=SIR1 PE=1 SV=1	Sulfite reductase [ferredoxin], putative [Ricinus communis]
comp9827_c0	--	--	Biological Process: pentose-phosphate shunt (GO:0006098);; Cellular Component: chloroplast thylakoid membrane (GO:0009535);; Biological Process: chloroplast organization (GO:0009658);; Biological Process: photosynthetic electron transport in photosystem I (GO:0009773);; Biological Process: chlorophyll biosynthetic process (GO:0015995);; Biological Process: positive regulation of transcription, DN…	--	--	predicted protein [Populus trichocarpa]
comp2987_c0	[S]	Function unknown	Molecular Function: structural molecule activity (GO:0005198);; Cellular Component: chloroplast stroma (GO:0009570);; Biological Process: iron-sulfur cluster assembly (GO:0016226);; Biological Process: hydrogen peroxide catabolic process (GO:0042744);; Molecular Function: iron-sulfur cluster binding (GO:0051536);;	K13628|2e-75|vvi:100249101|hypothetical protein LOC100249101	Iron-sulfur assembly protein IscA, chloroplastic OS=Arabidopsis thaliana GN=ISCA PE=2 SV=2	PREDICTED: iron-sulfur assembly protein IscA, chloroplastic-like [Vitis vinifera]
comp41020_c0	--	--	Cellular Component: mitochondrion (GO:0005739);; Cellular Component: cytosolic ribosome (GO:0022626);;	--	Pentatricopeptide repeat-containing protein At1g09220, mitochondrial OS=Arabidopsis thaliana GN=PCMP-E25 PE=2 SV=1	pentatricopeptide repeat-containing protein, putative [Ricinus communis]
comp8247_c0	[Q]	Secondary metabolites biosynthesis, transport and catabolism	Molecular Function: iron ion binding (GO:0005506);; Molecular Function: electron carrier activity (GO:0009055);; Cellular Component: chloroplast stroma (GO:0009570);; Biological Process: isopentenyl diphosphate biosynthetic process, methylerythritol 4-phosphate pathway (GO:0019288);; Molecular Function: oxygen binding (GO:0019825);; Molecular Function: heme binding (GO:0020037);; Cellular Compone…	--	Cytochrome P450 97B2, chloroplastic OS=Glycine max GN=CYP97B2 PE=2 SV=1	PREDICTED: cytochrome P450 97B2, chloroplastic [Vitis vinifera]
comp2448_c0	[LKJ]	--	Biological Process: RNA methylation (GO:0001510);; Molecular Function: RNA binding (GO:0003723);; Molecular Function: ATP binding (GO:0005524);; Cellular Component: nucleolus (GO:0005730);; Cellular Component: cytosol (GO:0005829);; Biological Process: rRNA processing (GO:0006364);; Molecular Function: ATP-dependent helicase activity (GO:0008026);; Molecular Function: zinc ion binding (GO:0008270…	--	DEAD-box ATP-dependent RNA helicase 5 OS=Oryza sativa subsp. japonica GN=Os07g0301200 PE=2 SV=1	PREDICTED: DEAD-box ATP-dependent RNA helicase 5-like [Setaria italica]
comp31576_c0	[RTKL]	--	Molecular Function: protein serine/threonine kinase activity (GO:0004674);; Molecular Function: ATP binding (GO:0005524);; Biological Process: protein phosphorylation (GO:0006468);;	--	U-box domain-containing protein 34 OS=Arabidopsis thaliana GN=PUB34 PE=3 SV=1	predicted protein [Populus trichocarpa]
comp14333_c0	[L]	Replication, recombination and repair	Biological Process: DNA repair (GO:0006281);; Biological Process: response to UV (GO:0009411);; Biological Process: cellular macromolecule biosynthetic process (GO:0034645);; Biological Process: nucleobase-containing compound biosynthetic process (GO:0034654);;	K02350|1e-114|vvi:100263126|hypothetical protein LOC100263126	DNA polymerase zeta catalytic subunit OS=Homo sapiens GN=REV3L PE=1 SV=2	hypothetical protein PRUPE_ppa000111mg [Prunus persica]
comp7565_c0	--	--	--	--	--	RING/U-box superfamily protein isoform 3 [Theobroma cacao]
comp29245_c0	--	--	--	--	--	hypothetical protein OsI_13984 [Oryza sativa Indica Group]
comp25827_c0	--	--	Cellular Component: intracellular (GO:0005622);; Biological Process: DNA repair (GO:0006281);; Molecular Function: metal ion binding (GO:0046872);;	--	Protein BREAST CANCER SUSCEPTIBILITY 1 homolog OS=Arabidopsis thaliana GN=BRCA1 PE=2 SV=1	Breast cancer susceptibility1, putative isoform 2 [Theobroma cacao]
comp7333_c0	[K]	Transcription	Molecular Function: hydrolase activity (GO:0016787);;	--	DIS3-like exonuclease 2 OS=Arabidopsis thaliana GN=SOV PE=1 SV=1	Ribonuclease II/R family protein, putative [Theobroma cacao]
comp34927_c0	--	--	Cellular Component: plastid (GO:0009536);; Cellular Component: membrane (GO:0016020);; Molecular Function: transferase activity (GO:0016740);;	--	Putative cellulose synthase-like protein H3 OS=Oryza sativa subsp. japonica GN=CSLH3 PE=3 SV=3	hypothetical protein SORBIDRAFT_06g016760 [Sorghum bicolor]
comp14383_c0	[R]	General function prediction only	Cellular Component: mitochondrion (GO:0005739);; Molecular Function: ion binding (GO:0043167);;	--	GTPase obg OS=Akkermansia muciniphila (strain ATCC BAA-835) GN=obg PE=3 SV=2	PREDICTED: GTP-binding protein 5-like [Vitis vinifera]
comp5328_c0	[L]	Replication, recombination and repair	Biological Process: RNA methylation (GO:0001510);; Molecular Function: DNA binding (GO:0003677);; Molecular Function: DNA-directed DNA polymerase activity (GO:0003887);; Molecular Function: ATP binding (GO:0005524);; Cellular Component: DNA replication factor C complex (GO:0005663);; Cellular Component: nucleolus (GO:0005730);; Biological Process: ATP catabolic process (GO:0006200);; Biological P…	K10755|0.0|vvi:100245502|hypothetical protein LOC100245502	Replication factor C subunit 2 OS=Oryza sativa subsp. japonica GN=RFC2 PE=2 SV=1	PREDICTED: replication factor C subunit 4 isoform 1 [Vitis vinifera]
comp4672_c0	[R]	General function prediction only	Molecular Function: nucleotide binding (GO:0000166);; Molecular Function: RNA cap binding (GO:0000339);; Biological Process: RNA splicing, via endonucleolytic cleavage and ligation (GO:0000394);; Molecular Function: protein binding (GO:0005515);; Cellular Component: mRNA cap binding complex (GO:0005845);; Cellular Component: nuclear cap binding complex (GO:0005846);; Biological Process: transcrip…	K12883|1e-158|vvi:100265980|hypothetical protein LOC100265980	Nuclear cap-binding protein subunit 2 OS=Arabidopsis thaliana GN=CBP20 PE=1 SV=1	PREDICTED: nuclear cap-binding protein subunit 2-like isoform 1 [Vitis vinifera]
comp5067_c0	--	--	Biological Process: RNA splicing, via endonucleolytic cleavage and ligation (GO:0000394);; Cellular Component: plasma membrane (GO:0005886);; Biological Process: methionine biosynthetic process (GO:0009086);;	--	--	Low affinity potassium transport system protein kup isoform 1 [Theobroma cacao]
comp6541_c0	--	--	Biological Process: protein N-linked glycosylation (GO:0006487);; Biological Process: response to heat (GO:0009408);; Biological Process: response to high light intensity (GO:0009644);; Cellular Component: chloroplast envelope (GO:0009941);; Biological Process: response to hydrogen peroxide (GO:0042542);;	--	--	PREDICTED: uncharacterized protein LOC100254432 [Vitis vinifera]
comp2701_c0	--	--	Molecular Function: ubiquitin-protein ligase activity (GO:0004842);; Cellular Component: nucleus (GO:0005634);; Cellular Component: cytoplasm (GO:0005737);; Cellular Component: plasma membrane (GO:0005886);; Biological Process: postreplication repair (GO:0006301);; Biological Process: fatty acid beta-oxidation (GO:0006635);; Biological Process: protein import into peroxisome matrix (GO:0016558);;…	--	Ubiquitin-conjugating enzyme E2 28 OS=Arabidopsis thaliana GN=UBC28 PE=2 SV=1	hypothetical protein PRUPE_ppa012939mg [Prunus persica]
comp13867_c0	--	--	--	--	tRNA-splicing endonuclease subunit SEN54 OS=Ashbya gossypii (strain ATCC 10895 / CBS 109.51 / FGSC 9923 / NRRL Y-1056) GN=SEN54 PE=3 SV=1	PREDICTED: uncharacterized protein LOC100257347 [Vitis vinifera]
comp37434_c0	--	--	Cellular Component: vacuolar membrane (GO:0005774);; Cellular Component: plant-type cell wall (GO:0009505);;	--	Mucin-2 OS=Homo sapiens GN=MUC2 PE=1 SV=2	PREDICTED: uncharacterized protein LOC100267814 isoform 1 [Vitis vinifera]
comp34931_c0	--	--	--	--	Formin-like protein 18 OS=Oryza sativa subsp. japonica GN=FH18 PE=2 SV=1	Os11g0579700 [Oryza sativa Japonica Group]
comp10549_c0	--	--	Cellular Component: cytoplasm (GO:0005737);; Molecular Function: ligase activity (GO:0016874);;	--	U-box domain-containing protein 4 OS=Arabidopsis thaliana GN=PUB4 PE=1 SV=3	ARM repeat superfamily protein [Theobroma cacao]
comp16348_c0	--	--	Molecular Function: nucleotide binding (GO:0000166);; Molecular Function: nucleic acid binding (GO:0003676);; Molecular Function: ubiquitin-protein ligase activity (GO:0004842);; Molecular Function: protein binding (GO:0005515);; Cellular Component: nucleus (GO:0005634);; Biological Process: ubiquitin-dependent protein catabolic process (GO:0006511);; Biological Process: red, far-red light photot…	--	Phytochrome A-associated F-box protein OS=Arabidopsis thaliana GN=EID1 PE=1 SV=2	unnamed protein product [Vitis vinifera]
comp5403_c0	[KAD]	--	Biological Process: mitotic cell cycle (GO:0000278);; Molecular Function: DNA binding (GO:0003677);; Molecular Function: chromatin binding (GO:0003682);; Molecular Function: sequence-specific DNA binding transcription factor activity (GO:0003700);; Biological Process: regulation of transcription, DNA-templated (GO:0006355);; Biological Process: RNA processing (GO:0006396);; Cellular Component: ch…	K12860|0.0|vvi:100243262|hypothetical protein LOC100243262	Cell division cycle 5-like protein OS=Arabidopsis thaliana GN=CDC5 PE=1 SV=2	PREDICTED: cell division cycle 5-like protein [Vitis vinifera]
comp30058_c0	--	--	Molecular Function: RNA binding (GO:0003723);; Molecular Function: RNA-directed DNA polymerase activity (GO:0003964);; Molecular Function: iron ion binding (GO:0005506);; Biological Process: RNA-dependent DNA replication (GO:0006278);; Biological Process: fatty acid biosynthetic process (GO:0006633);; Molecular Function: zinc ion binding (GO:0008270);; Biological Process: DNA integration (GO:0015…	--	--	hypothetical protein VITISV_014168 [Vitis vinifera]
comp28267_c0	--	--	--	--	--	hypothetical protein VITISV_025709 [Vitis vinifera]
comp9409_c0	[G]	Carbohydrate transport and metabolism	Cellular Component: phosphopyruvate hydratase complex (GO:0000015);; Molecular Function: magnesium ion binding (GO:0000287);; Molecular Function: phosphopyruvate hydratase activity (GO:0004634);; Cellular Component: nucleus (GO:0005634);; Biological Process: glycolysis (GO:0006096);;	K01689|0.0|vvi:100265663|similar to enolase, putative	Cytosolic enolase 3 OS=Arabidopsis thaliana GN=ENO3 PE=2 SV=1	PREDICTED: cytosolic enolase 3-like [Vitis vinifera]
comp1030_c0	[G]	Carbohydrate transport and metabolism	Biological Process: carbohydrate metabolic process (GO:0005975);; Molecular Function: isomerase activity (GO:0016853);; Biological Process: cellular biosynthetic process (GO:0044249);; Biological Process: small molecule metabolic process (GO:0044281);; Biological Process: organic substance biosynthetic process (GO:1901576);;	K01809|0.0|vvi:100263511|hypothetical protein LOC100263511	Mannose-6-phosphate isomerase 1 OS=Arabidopsis thaliana GN=PMI1 PE=1 SV=1	PREDICTED: mannose-6-phosphate isomerase [Vitis vinifera]
comp356_c0	--	--	Molecular Function: actin binding (GO:0003779);; Cellular Component: actin cytoskeleton (GO:0015629);; Biological Process: actin filament depolymerization (GO:0030042);;	K05765|3e-76|vvi:100246819|hypothetical protein LOC100246819	Actin-depolymerizing factor 7 OS=Oryza sativa subsp. japonica GN=ADF7 PE=2 SV=2	putative actin-depolymerizing factor [Wolffia arrhiza]
comp12278_c0	[R]	General function prediction only	Molecular Function: protein kinase activity (GO:0004672);; Molecular Function: ATP binding (GO:0005524);; Cellular Component: plasma membrane (GO:0005886);; Biological Process: protein phosphorylation (GO:0006468);; Cellular Component: plasmodesma (GO:0009506);;	--	Probable serine/threonine-protein kinase At5g41260 OS=Arabidopsis thaliana GN=At5g41260 PE=1 SV=1	unnamed protein product [Vitis vinifera]
comp3502_c0	[F]	Nucleotide transport and metabolism	Molecular Function: phosphoribosylamine-glycine ligase activity (GO:0004637);; Molecular Function: ATP binding (GO:0005524);; Biological Process: purine nucleotide biosynthetic process (GO:0006164);; Biological Process: purine nucleobase biosynthetic process (GO:0009113);; Cellular Component: chloroplast stroma (GO:0009570);; Molecular Function: metal ion binding (GO:0046872);;	K01945|0.0|vvi:100252684|hypothetical protein LOC100252684	Phosphoribosylamine--glycine ligase, chloroplastic OS=Arabidopsis thaliana GN=PUR2 PE=2 SV=2	Glycinamide ribonucleotide (GAR) synthetase isoform 2 [Theobroma cacao]
comp3049_c0	--	--	Cellular Component: cytoplasmic membrane-bounded vesicle (GO:0016023);;	--	--	PREDICTED: uncharacterized protein LOC100841111 [Brachypodium distachyon]
comp4674_c0	--	--	Molecular Function: zinc ion binding (GO:0008270);; Cellular Component: integral component of membrane (GO:0016021);; Molecular Function: cellulose synthase (UDP-forming) activity (GO:0016760);; Biological Process: cellulose biosynthetic process (GO:0030244);;	K10999|4e-29|vvi:100256811|hypothetical protein LOC100256811	Probable cellulose synthase A catalytic subunit 2 [UDP-forming] OS=Oryza sativa subsp. japonica GN=CESA2 PE=2 SV=1	unknown [Zea mays]
comp12954_c0	[H]	Coenzyme transport and metabolism	Molecular Function: catalytic activity (GO:0003824);; Cellular Component: mitochondrion (GO:0005739);; Biological Process: cellular protein modification process (GO:0006464);;	--	Lipoate-protein ligase A OS=Aeromonas salmonicida (strain A449) GN=lplA PE=3 SV=1	PREDICTED: probable lipoate-protein ligase A [Vitis vinifera]
comp5583_c0	--	--	--	--	Dentin sialophosphoprotein OS=Homo sapiens GN=DSPP PE=1 SV=2	Cell surface glycoprotein 1 [Komagataella pastoris CBS 7435]
comp37417_c0	--	--	Molecular Function: transferase activity, transferring phosphorus-containing groups (GO:0016772);;	--	Probable inactive serine/threonine-protein kinase bub1 OS=Dictyostelium discoideum GN=bub1 PE=3 SV=1	PREDICTED: mitotic checkpoint serine/threonine-protein kinase BUB1-like [Vitis vinifera]
comp17556_c0	--	--	Molecular Function: zinc ion binding (GO:0008270);; Cellular Component: integral component of membrane (GO:0016021);; Molecular Function: cellulose synthase (UDP-forming) activity (GO:0016760);; Biological Process: cellulose biosynthetic process (GO:0030244);;	--	Probable cellulose synthase A catalytic subunit 3 [UDP-forming] OS=Oryza sativa subsp. japonica GN=CESA3 PE=2 SV=1	unknown [Zea mays]
comp13449_c0	--	--	Molecular Function: transferase activity (GO:0016740);;	--	Malonyl-coenzyme A:anthocyanin 3-O-glucoside-6&apos;&apos;-O-malonyltransferase OS=Dahlia pinnata GN=3MAT PE=1 SV=1	hypothetical protein OsI_25739 [Oryza sativa Indica Group]
comp25075_c0	--	--	Molecular Function: binding (GO:0005488);; Biological Process: metabolic process (GO:0008152);;	--	Transcription factor bHLH14 OS=Arabidopsis thaliana GN=BHLH14 PE=2 SV=1	predicted protein [Populus trichocarpa]
comp22167_c0	--	--	Molecular Function: DNA binding (GO:0003677);; Molecular Function: sequence-specific DNA binding transcription factor activity (GO:0003700);; Cellular Component: nucleus (GO:0005634);; Cellular Component: mitochondrion (GO:0005739);; Biological Process: regulation of transcription, DNA-templated (GO:0006355);; Biological Process: gibberellin biosynthetic process (GO:0009686);; Biological Process:…	--	AP2-like ethylene-responsive transcription factor AIL1 OS=Arabidopsis thaliana GN=AIL1 PE=2 SV=1	unnamed protein product [Vitis vinifera]
comp23046_c0	[P]	Inorganic ion transport and metabolism	Molecular Function: superoxide dismutase activity (GO:0004784);; Biological Process: superoxide metabolic process (GO:0006801);; Molecular Function: metal ion binding (GO:0046872);; Biological Process: oxidation-reduction process (GO:0055114);;	K04564|1e-29|vvi:100233137|MNSOD	Superoxide dismutase [Mn], mitochondrial OS=Prunus persica GN=SOD PE=2 SV=1	manganese superoxide dismutase [Olea europaea]
comp46392_c0	--	--	--	--	Putative disease resistance RPP13-like protein 1 OS=Arabidopsis thaliana GN=RPPL1 PE=3 SV=1	unnamed protein product [Vitis vinifera]
comp8878_c0	[J]	Translation, ribosomal structure and biogenesis	Cellular Component: exosome (RNase complex) (GO:0000178);; Molecular Function: RNA binding (GO:0003723);; Molecular Function: structural constituent of ribosome (GO:0003735);; Molecular Function: exonuclease activity (GO:0004527);; Cellular Component: mitochondrion (GO:0005739);; Cellular Component: ribosome (GO:0005840);; Biological Process: translation (GO:0006412);; Biological Process: megagam…	K03679|1e-162|vvi:100244305|hypothetical protein LOC100244305	Exosome complex component rrp4 OS=Schizosaccharomyces pombe (strain 972 / ATCC 24843) GN=rrp4 PE=3 SV=1	PREDICTED: exosome complex component rrp4-like [Setaria italica]
comp2659_c0	[C]	Energy production and conversion	Biological Process: response to superoxide (GO:0000303);; Molecular Function: copper ion binding (GO:0005507);; Molecular Function: ATP binding (GO:0005524);; Cellular Component: cell wall (GO:0005618);; Cellular Component: mitochondrion (GO:0005739);; Cellular Component: vacuolar membrane (GO:0005774);; Cellular Component: cytosol (GO:0005829);; Cellular Component: plasma membrane (GO:0005886);;…	K01681|0.0|vvi:100253811|hypothetical protein LOC100253811	Aconitate hydratase, cytoplasmic OS=Cucurbita maxima PE=2 SV=1	PREDICTED: aconitate hydratase, cytoplasmic-like [Cucumis sativus]
comp436_c0	--	--	Molecular Function: dolichyl-diphosphooligosaccharide-protein glycotransferase activity (GO:0004579);; Biological Process: protein glycosylation (GO:0006486);; Biological Process: apoptotic process (GO:0006915);; Cellular Component: oligosaccharyltransferase complex (GO:0008250);; Cellular Component: integral component of membrane (GO:0016021);; Biological Process: negative regulation of programm…	K12668|3e-67|vvi:100265958|hypothetical protein LOC100265958	Dolichyl-diphosphooligosaccharide--protein glycosyltransferase subunit DAD2 OS=Arabidopsis thaliana GN=DAD2 PE=2 SV=1	defender against apoptotic death 1 [Gladiolus hybrid cultivar]
comp6855_c0	--	--	Molecular Function: glyceraldehyde-3-phosphate dehydrogenase (NAD+) (phosphorylating) activity (GO:0004365);; Molecular Function: endonuclease activity (GO:0004519);; Molecular Function: exonuclease activity (GO:0004527);; Molecular Function: calcium ion binding (GO:0005509);; Cellular Component: nucleus (GO:0005634);; Biological Process: glycolysis (GO:0006096);; Biological Process: response to …	--	Uncharacterized calcium-binding protein At1g02270 OS=Arabidopsis thaliana GN=At1g02270 PE=2 SV=2	endonuclease/exonuclease/phosphatase family protein, putative, expressed [Oryza sativa Japonica Group]
comp1775_c0	[J]	Translation, ribosomal structure and biogenesis	Molecular Function: RNA binding (GO:0003723);; Molecular Function: structural constituent of ribosome (GO:0003735);; Cellular Component: nucleolus (GO:0005730);; Cellular Component: plasma membrane (GO:0005886);; Biological Process: translation (GO:0006412);; Cellular Component: chloroplast (GO:0009507);; Cellular Component: cytosolic ribosome (GO:0022626);;	K02987|1e-130|pop:POPTR_837007|40S ribosomal protein S4 (RPS4A)	40S ribosomal protein S4 OS=Zea mays GN=RPS4 PE=2 SV=1	PREDICTED: 40S ribosomal protein S4-1-like [Glycine max]
comp23612_c0	[J]	Translation, ribosomal structure and biogenesis	--	--	Glutamyl-tRNA(Gln) amidotransferase subunit A OS=Thermoanaerobacter sp. (strain X514) GN=gatA PE=3 SV=1	hypothetical protein VITISV_016635 [Vitis vinifera]
comp14063_c0	--	--	Cellular Component: intracellular membrane-bounded organelle (GO:0043231);;	--	Transcription factor bHLH51 OS=Arabidopsis thaliana GN=BHLH51 PE=2 SV=1	PREDICTED: transcription factor bHLH51-like [Glycine max]
comp1309_c0	--	--	--	--	Uncharacterized protein LOC284861 OS=Homo sapiens PE=2 SV=1	PREDICTED: uncharacterized protein LOC100244902 isoform 1 [Vitis vinifera]
comp17875_c0	--	--	Molecular Function: hydrolase activity (GO:0016787);;	--	Uncharacterized 29.3 kDa protein OS=Orgyia pseudotsugata multicapsid polyhedrosis virus GN=ORF92 PE=4 SV=1	10A19I.1 [Oryza sativa Japonica Group]
comp16907_c0	--	--	--	--	OTU domain-containing protein 3 OS=Homo sapiens GN=OTUD3 PE=1 SV=1	unnamed protein product [Vitis vinifera]
comp15607_c0	[B]	Chromatin structure and dynamics	Molecular Function: DNA binding (GO:0003677);; Cellular Component: intracellular (GO:0005622);;	--	Nuclear transcription factor Y subunit B-2 OS=Arabidopsis thaliana GN=NFYB2 PE=2 SV=1	hypothetical protein SORBIDRAFT_02g038870 [Sorghum bicolor]
comp36699_c0	--	--	--	--	Uncharacterized protein At4g38062 OS=Arabidopsis thaliana GN=At4g38062 PE=2 SV=1	PREDICTED: uncharacterized protein At4g38062-like [Fragaria vesca subsp. vesca]
comp8348_c0	[G]	Carbohydrate transport and metabolism	Molecular Function: trehalose-phosphatase activity (GO:0004805);; Biological Process: trehalose biosynthetic process (GO:0005992);;	--	Probable trehalose-phosphate phosphatase G OS=Arabidopsis thaliana GN=TPPG PE=2 SV=1	hypothetical protein VITISV_039552 [Vitis vinifera]
comp12804_c0	--	--	Cellular Component: mitochondrion (GO:0005739);;	--	--	PREDICTED: uncharacterized protein LOC100259142 [Vitis vinifera]
comp19922_c0	--	--	--	--	Putative protein TPRXL OS=Homo sapiens GN=TPRXL PE=5 SV=2	--
comp44769_c0	[C]	Energy production and conversion	Cellular Component: mitochondrial respiratory chain complex I (GO:0005747);; Molecular Function: NADH dehydrogenase (ubiquinone) activity (GO:0008137);; Molecular Function: zinc ion binding (GO:0008270);; Cellular Component: chloroplast thylakoid membrane (GO:0009535);; Biological Process: electron transport chain (GO:0022900);; Molecular Function: cobalt ion binding (GO:0050897);;	K03936|2e-91|vvi:100244398|similar to nad9	NADH dehydrogenase [ubiquinone] iron-sulfur protein 3 OS=Arabidopsis thaliana GN=NAD9 PE=1 SV=2	nad9 [Triticum aestivum]
comp3329_c0	--	--	Molecular Function: DNA binding (GO:0003677);; Molecular Function: sequence-specific DNA binding transcription factor activity (GO:0003700);; Molecular Function: protein binding (GO:0005515);; Cellular Component: nucleus (GO:0005634);; Biological Process: protein targeting to membrane (GO:0006612);; Biological Process: response to salt stress (GO:0009651);; Biological Process: response to abscisi…	--	NAC transcription factor NAM-B1 OS=Hordeum vulgare subsp. spontaneum GN=NAM-B1 PE=4 SV=1	PREDICTED: NAC domain-containing protein 29 isoform 1 [Vitis vinifera]
comp8709_c0	--	--	Cellular Component: mitochondrion (GO:0005739);;	--	--	PREDICTED: uncharacterized protein LOC101299301 [Fragaria vesca subsp. vesca]
comp4015_c0	[V]	Defense mechanisms	Biological Process: polysaccharide biosynthetic process (GO:0000271);; Molecular Function: ATP binding (GO:0005524);; Cellular Component: plasma membrane (GO:0005886);; Biological Process: ATP catabolic process (GO:0006200);; Biological Process: pattern specification process (GO:0007389);; Biological Process: regulation of cell size (GO:0008361);; Molecular Function: xenobiotic-transporting ATPas…	K05658|0.0|rcu:RCOM_0855230|multidrug resistance protein 1, 2, putative (EC:3.6.3.44)	ABC transporter B family member 19 OS=Arabidopsis thaliana GN=ABCB19 PE=1 SV=1	multidrug resistance protein 1, 2, putative [Ricinus communis]
comp4367_c0	[E]	Amino acid transport and metabolism	Molecular Function: cysteine synthase activity (GO:0004124);; Molecular Function: copper ion binding (GO:0005507);; Cellular Component: mitochondrion (GO:0005739);; Biological Process: glycolysis (GO:0006096);; Biological Process: cysteine biosynthetic process from serine (GO:0006535);; Biological Process: water transport (GO:0006833);; Biological Process: hyperosmotic response (GO:0006972);; Bio…	K13034|0.0|vvi:100255091|hypothetical protein LOC100255091	Bifunctional L-3-cyanoalanine synthase/cysteine synthase 1, mitochondrial OS=Solanum tuberosum GN=PCAS-1 PE=1 SV=1	hypothetical protein VITISV_028023 [Vitis vinifera]
comp24938_c0	--	--	Molecular Function: binding (GO:0005488);;	--	--	PREDICTED: bromodomain adjacent to zinc finger domain protein 1A-like isoform X1 [Cicer arietinum]
comp16931_c0	--	--	--	--	--	PREDICTED: putative ribonuclease H protein At1g65750-like [Solanum lycopersicum]
comp5290_c0	[TZDR]	--	Molecular Function: calcium ion binding (GO:0005509);; Molecular Function: protein binding (GO:0005515);; Cellular Component: plasma membrane (GO:0005886);; Biological Process: trichome branching (GO:0010091);; Biological Process: response to cadmium ion (GO:0046686);;	K13448|1e-64|rcu:RCOM_0126810|calcium binding protein/cast, putative	Probable calcium-binding protein CML24 OS=Oryza sativa subsp. japonica GN=CML24 PE=2 SV=1	predicted protein [Hordeum vulgare subsp. vulgare]
comp38558_c0	--	--	Cellular Component: mitochondrion (GO:0005739);;	--	Pentatricopeptide repeat-containing protein At4g15720 OS=Arabidopsis thaliana GN=PCMP-H1 PE=2 SV=1	PREDICTED: pentatricopeptide repeat-containing protein At4g15720-like [Fragaria vesca subsp. vesca]
comp34750_c0	--	--	--	--	--	Os02g0752300 [Oryza sativa Japonica Group]
comp28954_c0	--	--	--	--	--	hypothetical protein VITISV_027168 [Vitis vinifera]
comp2510_c0	--	--	Molecular Function: mRNA binding (GO:0003729);; Cellular Component: mRNA cleavage factor complex (GO:0005849);; Biological Process: mRNA polyadenylation (GO:0006378);; Cellular Component: plastid (GO:0009536);; Molecular Function: hydrolase activity (GO:0016787);;	K14397|4e-93|vvi:100261950|hypothetical protein LOC100261950	Cleavage and polyadenylation specificity factor subunit 5 OS=Xenopus laevis GN=cpsf5 PE=2 SV=1	unknown [Picea sitchensis]
comp28003_c0	--	--	Cellular Component: nucleus (GO:0005634);; Biological Process: mitosis (GO:0007067);; Biological Process: chromosome condensation (GO:0030261);;	K11491|2e-75|osa:4352458|Os12g0548100	--	PREDICTED: condensin-2 complex subunit D3-like [Setaria italica]
comp1458_c0	--	--	Cellular Component: endosome (GO:0005768);; Cellular Component: vacuolar membrane (GO:0005774);; Cellular Component: Golgi apparatus (GO:0005794);; Cellular Component: trans-Golgi network (GO:0005802);; Cellular Component: plasma membrane (GO:0005886);; Biological Process: acetyl-CoA metabolic process (GO:0006084);; Cellular Component: chloroplast (GO:0009507);; Biological Process: sterol biosynt…	--	Photosystem I reaction center subunit II, chloroplastic OS=Spinacia oleracea GN=psaD PE=1 SV=2	PREDICTED: major facilitator superfamily domain-containing protein 5 [Vitis vinifera]
comp403_c0	[J]	Translation, ribosomal structure and biogenesis	Molecular Function: structural constituent of ribosome (GO:0003735);; Cellular Component: cell wall (GO:0005618);; Cellular Component: plasma membrane (GO:0005886);; Biological Process: translation (GO:0006412);; Cellular Component: chloroplast (GO:0009507);; Cellular Component: cytosolic large ribosomal subunit (GO:0022625);;	K02910|2e-63|vvi:100267870|hypothetical protein LOC100267870	60S ribosomal protein L31 OS=Perilla frutescens GN=RPL31 PE=2 SV=1	PREDICTED: 60S ribosomal protein L31-like isoform 1 [Cucumis sativus]
comp21110_c0	--	--	Molecular Function: protein dimerization activity (GO:0046983);;	--	Putative pentatricopeptide repeat-containing protein At1g74580 OS=Arabidopsis thaliana GN=At1g74580 PE=3 SV=1	pentatricopeptide repeat-containing protein, putative [Ricinus communis]
comp19261_c0	--	--	Biological Process: metal ion transport (GO:0030001);; Molecular Function: metal ion binding (GO:0046872);;	--	Heavy metal-associated isoprenylated plant protein 26 OS=Arabidopsis thaliana GN=HIPP26 PE=1 SV=1	predicted protein [Populus trichocarpa]
comp15973_c0	--	--	--	--	--	hypothetical protein OsI_34323 [Oryza sativa Indica Group]
comp12265_c0	--	--	Cellular Component: cytoplasmic membrane-bounded vesicle (GO:0016023);;	--	Germin-like protein 3-1 OS=Oryza sativa subsp. japonica GN=Os03g0179000 PE=2 SV=1	PREDICTED: germin-like protein subfamily 1 member 1-like [Fragaria vesca subsp. vesca]
comp18798_c0	--	--	Biological Process: signal transduction (GO:0007165);; Biological Process: response to hormone (GO:0009725);; Biological Process: cellular response to organic substance (GO:0071310);; Biological Process: cellular response to oxygen-containing compound (GO:1901701);;	--	Dapper homolog 3 OS=Mus musculus GN=Dact3 PE=1 SV=1	PREDICTED: uncharacterized protein LOC100255664 [Vitis vinifera]
comp34867_c0	--	--	--	--	B3 domain-containing protein Os01g0723500 OS=Oryza sativa subsp. japonica GN=Os01g0723500 PE=2 SV=1	unnamed protein product [Vitis vinifera]
comp1697_c0	--	--	--	--	--	hypothetical protein ARALYDRAFT_900440 [Arabidopsis lyrata subsp. lyrata]
comp17256_c0	--	--	Cellular Component: nucleus (GO:0005634);; Biological Process: ethylene biosynthetic process (GO:0009693);;	--	--	unnamed protein product [Vitis vinifera]
comp7737_c0	[U]	Intracellular trafficking, secretion, and vesicular transport	Biological Process: mitotic G2 phase (GO:0000085);; Cellular Component: nucleus (GO:0005634);; Cellular Component: cytosol (GO:0005829);; Cellular Component: plasma membrane (GO:0005886);; Biological Process: regulation of DNA replication (GO:0006275);; Biological Process: DNA methylation (GO:0006306);; Biological Process: chromatin silencing (GO:0006342);; Biological Process: cell proliferation …	--	Protein CYPRO4 OS=Cynara cardunculus GN=CYPRO4 PE=2 SV=1	Vacuolar import/degradation [Theobroma cacao]
comp1949_c0	--	--	Molecular Function: DNA binding (GO:0003677);; Molecular Function: sequence-specific DNA binding transcription factor activity (GO:0003700);; Molecular Function: protein binding (GO:0005515);; Cellular Component: nucleus (GO:0005634);; Cellular Component: mitochondrion (GO:0005739);; Biological Process: cell death (GO:0008219);; Biological Process: chloroplast organization (GO:0009658);; Cellular…	--	--	uncharacterized protein LOC100806315 [Glycine max]
comp3280_c0	[A]	RNA processing and modification	--	--	E3 ubiquitin-protein ligase MARCH9 OS=Homo sapiens GN=MARCH9 PE=1 SV=2	PREDICTED: uncharacterized protein LOC100250124 [Vitis vinifera]
comp27480_c0	--	--	Molecular Function: amidase activity (GO:0004040);; Molecular Function: carbon-nitrogen ligase activity, with glutamine as amido-N-donor (GO:0016884);;	--	--	amidase family protein [Arabidopsis lyrata subsp. lyrata]
comp97_c0	[G]	Carbohydrate transport and metabolism	Cellular Component: phosphopyruvate hydratase complex (GO:0000015);; Molecular Function: magnesium ion binding (GO:0000287);; Molecular Function: phosphopyruvate hydratase activity (GO:0004634);; Biological Process: glycolysis (GO:0006096);;	K01689|0.0|pop:POPTR_575698|enolase (EC:4.2.1.11)	Enolase 2 OS=Zea mays GN=ENO2 PE=2 SV=1	enolase1 [Guzmania wittmackii x Guzmania lingulata]
comp3169_c0	[RTKL]	--	Molecular Function: protein serine/threonine kinase activity (GO:0004674);; Molecular Function: ATP binding (GO:0005524);; Biological Process: protein phosphorylation (GO:0006468);;	K08853|0.0|vvi:100258075|similar to protein kinase family protein	Probable serine/threonine-protein kinase DDB_G0276461 OS=Dictyostelium discoideum GN=DDB_G0276461 PE=3 SV=1	PREDICTED: uncharacterized protein LOC100258075 [Vitis vinifera]
comp41257_c0	--	--	Molecular Function: binding (GO:0005488);;	--	--	hypothetical protein OsJ_27069 [Oryza sativa Japonica Group]
comp7915_c0	--	--	Cellular Component: cytoplasm (GO:0005737);; Biological Process: cellular amino acid biosynthetic process (GO:0008652);; Molecular Function: transferase activity (GO:0016740);;	--	--	Amino acid kinase family protein isoform 1 [Theobroma cacao]
comp19193_c0	[P]	Inorganic ion transport and metabolism	Molecular Function: potassium ion transmembrane transporter activity (GO:0015079);; Cellular Component: integral component of membrane (GO:0016021);; Biological Process: potassium ion transmembrane transport (GO:0071805);;	--	Potassium transporter 26 OS=Oryza sativa subsp. japonica GN=HAK26 PE=2 SV=1	Os08g0510300 [Oryza sativa Japonica Group]
comp11613_c0	--	--	--	--	Uncharacterized protein At5g05190 OS=Arabidopsis thaliana GN=Y-1 PE=1 SV=1	TPA: hypothetical protein ZEAMMB73_574558 [Zea mays]
comp4245_c0	--	--	--	--	Serine-rich adhesin for platelets OS=Staphylococcus aureus (strain MW2) GN=sraP PE=3 SV=1	unnamed protein product [Vitis vinifera]
comp9032_c0	--	--	Biological Process: fatty acid biosynthetic process (GO:0006633);; Biological Process: response to cold (GO:0009409);; Biological Process: response to light stimulus (GO:0009416);; Cellular Component: membrane (GO:0016020);; Cellular Component: cytoplasmic membrane-bounded vesicle (GO:0016023);; Molecular Function: transferase activity, transferring acyl groups other than amino-acyl groups (GO:00…	--	3-ketoacyl-CoA synthase 17 OS=Arabidopsis thaliana GN=KCS17 PE=2 SV=2	PREDICTED: 3-ketoacyl-CoA synthase 11 [Vitis vinifera]
comp9182_c0	--	--	Cellular Component: nucleus (GO:0005634);; Biological Process: intracellular protein transport (GO:0006886);; Biological Process: vesicle-mediated transport (GO:0016192);; Cellular Component: clathrin adaptor complex (GO:0030131);;	--	AP-5 complex subunit mu-1 OS=Bos taurus GN=AP5M1 PE=2 SV=1	PREDICTED: uncharacterized protein LOC100259662 [Vitis vinifera]
comp2786_c0	[R]	General function prediction only	Cellular Component: endoplasmic reticulum lumen (GO:0005788);; Cellular Component: plasma membrane (GO:0005886);; Biological Process: protein folding (GO:0006457);; Biological Process: response to heat (GO:0009408);; Biological Process: response to high light intensity (GO:0009644);; Cellular Component: cytoplasmic membrane-bounded vesicle (GO:0016023);; Molecular Function: heat shock protein bin…	K09527|0.0|rcu:RCOM_1356650|Chaperone protein dnaJ, putative	DnaJ homolog subfamily C member 3 homolog OS=Dictyostelium discoideum GN=dnajc3 PE=3 SV=1	Chaperone protein dnaJ, putative [Ricinus communis]
comp8038_c0	[S]	Function unknown	Cellular Component: mitochondrion (GO:0005739);; Cellular Component: membrane (GO:0016020);; Cellular Component: cytoplasmic membrane-bounded vesicle (GO:0016023);; Molecular Function: transferase activity, transferring phosphorus-containing groups (GO:0016772);;	--	Protein STRUBBELIG-RECEPTOR FAMILY 3 OS=Arabidopsis thaliana GN=SRF3 PE=1 SV=1	unnamed protein product [Vitis vinifera]
comp17329_c0	--	--	--	--	Annexin D8 OS=Arabidopsis thaliana GN=ANNAT8 PE=2 SV=2	Annexin 8, putative [Theobroma cacao]
comp32038_c0	--	--	Biological Process: cellular process (GO:0009987);; Molecular Function: transferase activity, transferring phosphorus-containing groups (GO:0016772);; Molecular Function: ion binding (GO:0043167);; Molecular Function: organic cyclic compound binding (GO:0097159);; Molecular Function: heterocyclic compound binding (GO:1901363);;	--	Uncharacterized mitochondrial protein AtMg01250 OS=Arabidopsis thaliana GN=AtMg01250 PE=4 SV=1	hypothetical protein [Beta vulgaris subsp. vulgaris]
comp23586_c0	[Q]	Secondary metabolites biosynthesis, transport and catabolism	Molecular Function: monooxygenase activity (GO:0004497);; Molecular Function: iron ion binding (GO:0005506);; Molecular Function: electron carrier activity (GO:0009055);; Molecular Function: oxidoreductase activity, acting on paired donors, with incorporation or reduction of molecular oxygen (GO:0016705);; Molecular Function: heme binding (GO:0020037);; Molecular Function: secologanin synthase ac…	K10717|0.0|vvi:100258332|hypothetical protein LOC100258332	Cytokinin hydroxylase OS=Arabidopsis thaliana GN=CYP735A1 PE=1 SV=1	PREDICTED: cytokinin hydroxylase [Vitis vinifera]
comp4297_c0	--	--	Cellular Component: intracellular part (GO:0044424);;	--	Calmodulin-binding transcription activator 4 OS=Arabidopsis thaliana GN=CMTA4 PE=1 SV=1	Calmodulin-binding transcription activator 1 [Triticum urartu]
comp7038_c0	[A]	RNA processing and modification	--	K13095|1e-103|ppp:PHYPADRAFT_189930|hypothetical protein	Branchpoint-bridging protein OS=Neurospora crassa (strain ATCC 24698 / 74-OR23-1A / CBS 708.71 / DSM 1257 / FGSC 987) GN=bpb-1 PE=3 SV=1	predicted protein [Physcomitrella patens subsp. patens]
comp25844_c0	--	--	--	--	--	Retrotransposon, unclassified-like protein [Theobroma cacao]
comp2779_c0	[MG]	--	Molecular Function: nucleotide binding (GO:0000166);; Cellular Component: endosome (GO:0005768);; Cellular Component: Golgi apparatus (GO:0005794);; Cellular Component: trans-Golgi network (GO:0005802);; Biological Process: carbohydrate metabolic process (GO:0005975);; Biological Process: nucleotide-sugar metabolic process (GO:0009225);; Molecular Function: UDP-glucuronate 4-epimerase activity (G…	K08679|3e-72|pop:POPTR_578682|hypothetical protein	UDP-glucuronate 4-epimerase 1 OS=Arabidopsis thaliana GN=GAE1 PE=1 SV=1	PREDICTED: UDP-glucuronate 4-epimerase 1-like [Cucumis sativus]
comp2796_c0	--	--	Cellular Component: nucleus (GO:0005634);; Biological Process: protein N-linked glycosylation (GO:0006487);; Biological Process: hormone-mediated signaling pathway (GO:0009755);; Biological Process: sugar mediated signaling pathway (GO:0010182);; Biological Process: regulation of ethylene biosynthetic process (GO:0010364);; Biological Process: cellular response to phosphate starvation (GO:0016036…	--	Ethylene-overproduction protein 1 OS=Arabidopsis thaliana GN=ETO1 PE=1 SV=2	PREDICTED: ethylene-overproduction protein 1-like [Vitis vinifera]
comp19728_c0	--	--	Cellular Component: plasmodesma (GO:0009506);; Cellular Component: chloroplast (GO:0009507);; Cellular Component: membrane (GO:0016020);; Molecular Function: transferase activity, transferring glycosyl groups (GO:0016757);;	--	--	hypothetical protein SORBIDRAFT_06g034070 [Sorghum bicolor]
comp15879_c0	--	--	--	--	Wiskott-Aldrich syndrome protein homolog 1 OS=Schizosaccharomyces pombe (strain 972 / ATCC 24843) GN=wsp1 PE=1 SV=3	PREDICTED: proline-rich receptor-like protein kinase PERK15-like isoform 2 [Glycine max]
comp8777_c0	--	--	Cellular Component: nucleus (GO:0005634);; Biological Process: protein glycosylation (GO:0006486);; Biological Process: protein targeting to vacuole (GO:0006623);; Cellular Component: plastid (GO:0009536);; Biological Process: vesicle-mediated transport (GO:0016192);;	--	Glucose-induced degradation protein 8 homolog OS=Dictyostelium discoideum GN=DDB_G0279265 PE=3 SV=2	hypothetical protein PRUPE_ppa002130mg [Prunus persica]
comp12255_c0	[R]	General function prediction only	Molecular Function: oxidoreductase activity, acting on paired donors, with incorporation or reduction of molecular oxygen, 2-oxoglutarate as one donor, and incorporation of one atom each of oxygen into both donors (GO:0016706);; Biological Process: glucosinolate biosynthetic process (GO:0019761);;	--	1-aminocyclopropane-1-carboxylate oxidase homolog OS=Solanum lycopersicum GN=ACO3 PE=1 SV=1	hypothetical protein VITISV_000986 [Vitis vinifera]
comp11748_c0	--	--	Biological Process: single-organism cellular process (GO:0044763);; Biological Process: regulation of cellular process (GO:0050794);; Biological Process: response to stimulus (GO:0050896);;	--	Translation initiation factor IF-2 OS=Arthrobacter aurescens (strain TC1) GN=infB PE=3 SV=1	predicted protein [Populus trichocarpa]
comp443_c0	[MG]	--	Molecular Function: nucleotide binding (GO:0000166);; Molecular Function: protein binding (GO:0005515);; Cellular Component: endosome (GO:0005768);; Cellular Component: Golgi apparatus (GO:0005794);; Cellular Component: trans-Golgi network (GO:0005802);; Biological Process: carbohydrate metabolic process (GO:0005975);; Biological Process: tryptophan catabolic process (GO:0006569);; Biological Pro…	K08679|0.0|vvi:100241904|hypothetical protein LOC100241904	UDP-glucuronate 4-epimerase 6 OS=Arabidopsis thaliana GN=GAE6 PE=1 SV=1	PREDICTED: UDP-glucuronate 4-epimerase 6 [Vitis vinifera]
comp26843_c0	[RTKL]	--	Molecular Function: protein serine/threonine kinase activity (GO:0004674);; Molecular Function: ATP binding (GO:0005524);; Cellular Component: cytoplasmic membrane-bounded vesicle (GO:0016023);; Biological Process: positive regulation of translation (GO:0045727);; Biological Process: protein autophosphorylation (GO:0046777);;	K02214|1e-143|vvi:100261519|hypothetical protein LOC100261519	Cell division cycle 7-related protein kinase OS=Homo sapiens GN=CDC7 PE=1 SV=1	unnamed protein product [Vitis vinifera]
comp14683_c0	--	--	Molecular Function: 1-acylglycerol-3-phosphate O-acyltransferase activity (GO:0003841);; Biological Process: flower development (GO:0009908);; Biological Process: cutin biosynthetic process (GO:0010143);; Cellular Component: membrane (GO:0016020);;	K13508|2e-44|rcu:RCOM_1151840|ER glycerol-phosphate acyltransferase (EC:2.3.1.15)	Glycerol-3-phosphate 2-O-acyltransferase 6 OS=Arabidopsis thaliana GN=GPAT6 PE=1 SV=1	Glycerol-3-phosphate acyltransferase 6 [Triticum urartu]
comp2416_c0	--	--	--	--	--	TPA: hypothetical protein ZEAMMB73_557706 [Zea mays]
comp5020_c0	--	--	Biological Process: MAPK cascade (GO:0000165);; Biological Process: respiratory burst involved in defense response (GO:0002679);; Molecular Function: 1-phosphatidylinositol 4-kinase activity (GO:0004430);; Cellular Component: cytosol (GO:0005829);; Biological Process: N-terminal protein myristoylation (GO:0006499);; Biological Process: protein targeting to membrane (GO:0006612);; Biological Proce…	--	Probable phosphatidylinositol 4-kinase type 2-beta At1g26270 OS=Arabidopsis thaliana GN=At1g26270 PE=1 SV=1	hypothetical protein PRUPE_ppa017046mg [Prunus persica]
comp2597_c0	[E]	Amino acid transport and metabolism	Molecular Function: histidine decarboxylase activity (GO:0004398);; Cellular Component: cytosol (GO:0005829);; Cellular Component: plasma membrane (GO:0005886);; Biological Process: cellular amino acid metabolic process (GO:0006520);; Biological Process: ethanolamine metabolic process (GO:0006580);; Biological Process: embryo development ending in seed dormancy (GO:0009793);; Molecular Function: …	K01590|0.0|sbi:SORBI_04g022140|hypothetical protein	Histidine decarboxylase OS=Solanum lycopersicum GN=HDC PE=2 SV=1	PREDICTED: histidine decarboxylase-like [Setaria italica]
comp44212_c0	--	--	--	--	--	hypothetical protein MTR_8g103960 [Medicago truncatula]
comp7955_c0	--	--	Biological Process: MAPK cascade (GO:0000165);; Molecular Function: protein binding (GO:0005515);; Biological Process: regulation of transcription, DNA-templated (GO:0006355);; Biological Process: protein targeting to membrane (GO:0006612);; Biological Process: response to bacterium (GO:0009617);; Biological Process: shade avoidance (GO:0009641);; Biological Process: chloroplast organization (GO:…	--	Probable salt tolerance-like protein At1g78600 OS=Arabidopsis thaliana GN=At1g78600 PE=1 SV=2	zinc finger protein, putative [Ricinus communis]
comp13955_c0	[RTKL]	--	Biological Process: cell plate assembly (GO:0000919);; Molecular Function: protein kinase activity (GO:0004672);; Molecular Function: protein binding (GO:0005515);; Cellular Component: nucleus (GO:0005634);; Biological Process: DNA replication (GO:0006260);; Biological Process: protein phosphorylation (GO:0006468);; Biological Process: organelle organization (GO:0006996);; Cellular Component: phr…	--	Mitogen-activated protein kinase kinase kinase NPK1 OS=Nicotiana tabacum GN=NPK1 PE=1 SV=1	unnamed protein product [Vitis vinifera]
comp1353_c0	[E]	Amino acid transport and metabolism	Cellular Component: cytoplasm (GO:0005737);; Biological Process: L-phenylalanine catabolic process (GO:0006559);; Biological Process: cinnamic acid biosynthetic process (GO:0009800);; Molecular Function: phenylalanine ammonia-lyase activity (GO:0045548);;	K10775|0.0|rcu:RCOM_1355480|Phenylalanine ammonia-lyase, putative (EC:4.3.1.24)	Phenylalanine ammonia-lyase 3 OS=Petroselinum crispum GN=PAL3 PE=2 SV=1	RecName: Full=Phenylalanine ammonia-lyase 3
comp39982_c0	--	--	Molecular Function: binding (GO:0005488);;	--	--	PREDICTED: uncharacterized protein LOC100266246 [Vitis vinifera]
comp19185_c0	--	--	Cellular Component: Golgi membrane (GO:0000139);; Cellular Component: nucleus (GO:0005634);; Cellular Component: integral component of membrane (GO:0016021);; Molecular Function: transferase activity, transferring glycosyl groups (GO:0016757);; Biological Process: pollen tube development (GO:0048868);;	--	Probable xyloglucan glycosyltransferase 7 OS=Oryza sativa subsp. japonica GN=CSLC7 PE=2 SV=1	unknown [Lotus japonicus]
comp3653_c0	--	--	Cellular Component: mitochondrion (GO:0005739);; Cellular Component: plastid (GO:0009536);; Cellular Component: membrane (GO:0016020);;	--	Serine/arginine repetitive matrix protein 1 OS=Gallus gallus GN=SRRM1 PE=2 SV=1	H0502B11.8 [Oryza sativa Indica Group]
comp13015_c0	--	--	Molecular Function: binding (GO:0005488);;	K13152|2e-52|sbi:SORBI_03g009590|hypothetical protein	Zinc finger CCCH domain-containing protein 3 OS=Oryza sativa subsp. japonica GN=Os01g0252200 PE=2 SV=2	RecName: Full=Zinc finger CCCH domain-containing protein 3; Short=OsC3H3
comp9560_c0	--	--	--	--	--	hypothetical protein VITISV_031843 [Vitis vinifera]
comp5186_c0	--	--	--	K09060|1e-115|rcu:RCOM_1617330|Common plant regulatory factor CPRF-1, putative	G-box-binding factor 3 OS=Arabidopsis thaliana GN=GBF3 PE=1 SV=2	PREDICTED: common plant regulatory factor 1-like isoform X3 [Cicer arietinum]
comp6663_c0	--	--	Molecular Function: alpha-N-acetylglucosaminidase activity (GO:0004561);; Cellular Component: vacuole (GO:0005773);; Cellular Component: chloroplast (GO:0009507);; Cellular Component: cytoplasmic membrane-bounded vesicle (GO:0016023);;	K01205|0.0|vvi:100261888|hypothetical protein LOC100261888	Alpha-N-acetylglucosaminidase OS=Homo sapiens GN=NAGLU PE=1 SV=2	hypothetical protein PRUPE_ppa001555mg [Prunus persica]
comp6063_c0	[RTKL]	--	Molecular Function: nucleotide binding (GO:0000166);; Molecular Function: protein kinase activity (GO:0004672);; Biological Process: cellular protein modification process (GO:0006464);; Biological Process: phosphorylation (GO:0016310);;	--	Mitogen-activated protein kinase kinase kinase YODA OS=Arabidopsis thaliana GN=YDA PE=1 SV=1	PREDICTED: mitogen-activated protein kinase kinase kinase YODA-like [Setaria italica]
comp22221_c0	--	--	--	--	--	PREDICTED: uncharacterized protein LOC100245533 isoform 3 [Vitis vinifera]
comp4859_c0	--	--	Cellular Component: plastid (GO:0009536);;	--	Protein EXECUTER 1, chloroplastic OS=Arabidopsis thaliana GN=EX1 PE=1 SV=1	PREDICTED: protein EXECUTER 1, chloroplastic [Vitis vinifera]
comp9964_c0	--	--	Molecular Function: zinc ion binding (GO:0008270);; Biological Process: response to chitin (GO:0010200);;	--	NEP1-interacting protein-like 2 OS=Arabidopsis thaliana GN=ATL24 PE=1 SV=2	PREDICTED: NEP1-interacting protein-like 2 [Vitis vinifera]
comp42263_c0	[I]	Lipid transport and metabolism	Molecular Function: CDP-diacylglycerol-inositol 3-phosphatidyltransferase activity (GO:0003881);; Cellular Component: endoplasmic reticulum (GO:0005783);; Cellular Component: Golgi apparatus (GO:0005794);; Biological Process: phosphatidylinositol biosynthetic process (GO:0006661);; Cellular Component: membrane (GO:0016020);; Cellular Component: cytoplasmic membrane-bounded vesicle (GO:0016023);;	--	Probable CDP-diacylglycerol--inositol 3-phosphatidyltransferase 2 OS=Arabidopsis thaliana GN=PIS2 PE=2 SV=2	predicted protein [Populus trichocarpa]
comp10049_c0	--	--	Molecular Function: galactoside 2-alpha-L-fucosyltransferase activity (GO:0008107);; Biological Process: response to sucrose (GO:0009744);; Biological Process: response to glucose (GO:0009749);; Biological Process: response to fructose (GO:0009750);; Biological Process: plant-type cell wall biogenesis (GO:0009832);; Biological Process: xyloglucan biosynthetic process (GO:0009969);; Biological Pro…	K13681|3e-12|sbi:SORBI_04g034120|hypothetical protein	Galactoside 2-alpha-L-fucosyltransferase OS=Pisum sativum GN=FT1 PE=2 SV=1	PREDICTED: galactoside 2-alpha-L-fucosyltransferase-like [Cucumis sativus]
comp44065_c0	--	--	--	--	--	Putative retroelement [Oryza sativa Japonica Group]
comp3860_c0	--	--	--	--	Squamosa promoter-binding-like protein 1 OS=Arabidopsis thaliana GN=SPL1 PE=1 SV=2	unnamed protein product [Vitis vinifera]
comp3635_c0	--	--	Cellular Component: mitochondrion (GO:0005739);; Cellular Component: vacuole (GO:0005773);; Cellular Component: plasma membrane (GO:0005886);;	--	--	predicted protein [Populus trichocarpa]
comp11963_c0	--	--	--	--	Formin-like protein 5 OS=Oryza sativa subsp. japonica GN=FH5 PE=2 SV=2	PREDICTED: uncharacterized protein LOC100813702 [Glycine max]
comp16117_c0	--	--	--	--	--	predicted protein [Populus trichocarpa]
comp6990_c0	[J]	Translation, ribosomal structure and biogenesis	Molecular Function: nucleotide binding (GO:0000166);; Molecular Function: protein serine/threonine kinase activity (GO:0004674);; Cellular Component: membrane (GO:0016020);; Biological Process: phosphorylation (GO:0016310);; Molecular Function: ion binding (GO:0043167);; Cellular Component: cell part (GO:0044464);; Biological Process: single-organism cellular process (GO:0044763);; Biological Pro…	K13412|2e-61|sbi:SORBI_09g029950|hypothetical protein	Calcium-dependent protein kinase 3 OS=Arabidopsis thaliana GN=CPK3 PE=1 SV=1	predicted protein [Hordeum vulgare subsp. vulgare]
comp2132_c0	--	--	Cellular Component: proteasome complex (GO:0000502);; Cellular Component: nucleus (GO:0005634);; Cellular Component: plasma membrane (GO:0005886);; Cellular Component: plastid (GO:0009536);; Molecular Function: enzyme regulator activity (GO:0030234);; Biological Process: regulation of protein catabolic process (GO:0042176);; Biological Process: regulation of catalytic activity (GO:0050790);;	K03033|0.0|vvi:100264130|hypothetical protein LOC100264130	Probable 26S proteasome non-ATPase regulatory subunit 3 OS=Daucus carota GN=21D7 PE=1 SV=2	PREDICTED: probable 26S proteasome non-ATPase regulatory subunit 3 [Vitis vinifera]
comp16866_c0	--	--	Biological Process: cellular process (GO:0009987);; Molecular Function: organic cyclic compound binding (GO:0097159);; Molecular Function: heterocyclic compound binding (GO:1901363);;	--	Ninja-family protein 1 OS=Triticum aestivum GN=AFP-A1 PE=3 SV=1	ABI five binding protein 3, putative [Theobroma cacao]
comp640_c0	[OC]	--	Biological Process: cell morphogenesis (GO:0000902);; Molecular Function: nucleic acid binding (GO:0003676);; Molecular Function: catalytic activity (GO:0003824);; Cellular Component: spliceosomal complex (GO:0005681);; Biological Process: protein targeting to vacuole (GO:0006623);; Biological Process: Golgi organization (GO:0007030);; Biological Process: vacuole organization (GO:0007033);; Biolo…	K12859|3e-99|vvi:100249310|hypothetical protein LOC100249310	Thioredoxin-like protein 4A OS=Mus musculus GN=Txnl4a PE=2 SV=1	PREDICTED: thioredoxin-like protein 4A-like [Fragaria vesca subsp. vesca]
comp5333_c0	--	--	Cellular Component: cell wall (GO:0005618);; Cellular Component: cytoplasmic membrane-bounded vesicle (GO:0016023);; Molecular Function: peptidase inhibitor activity (GO:0030414);;	--	Cysteine proteinase inhibitor 8 OS=Oryza sativa subsp. japonica GN=Os03g0429000 PE=2 SV=1	Os03g0429000 [Oryza sativa Japonica Group]
comp29389_c0	[J]	Translation, ribosomal structure and biogenesis	Molecular Function: nucleotide binding (GO:0000166);; Molecular Function: protein kinase activity (GO:0004672);; Cellular Component: plastid (GO:0009536);; Cellular Component: membrane (GO:0016020);; Cellular Component: cytoplasmic membrane-bounded vesicle (GO:0016023);; Biological Process: phosphorylation (GO:0016310);;	--	Probable leucine-rich repeat receptor-like protein kinase At1g68400 OS=Arabidopsis thaliana GN=At1g68400 PE=2 SV=1	PREDICTED: probable leucine-rich repeat receptor-like protein kinase At1g68400-like [Setaria italica]
comp12614_c0	--	--	Molecular Function: DNA binding (GO:0003677);; Molecular Function: chromatin binding (GO:0003682);; Cellular Component: nucleus (GO:0005634);; Molecular Function: isomerase activity (GO:0016853);;	--	--	hypothetical protein PRUPE_ppa011619mg [Prunus persica]
comp19447_c0	--	--	--	--	--	Uncharacterized protein isoform 1 [Theobroma cacao]
comp19311_c0	--	--	--	--	--	PREDICTED: uncharacterized protein LOC100779683 [Glycine max]
comp593_c0	--	--	Cellular Component: plasma membrane (GO:0005886);; Cellular Component: integral component of membrane (GO:0016021);; Cellular Component: cytoplasmic membrane-bounded vesicle (GO:0016023);;	--	Tetraspanin-8 OS=Arabidopsis thaliana GN=TET8 PE=2 SV=1	senescence-associated protein [Vitis quinquangularis]
comp10108_c0	--	--	--	--	--	tho complex component [Ophiostoma piceae UAMH 11346]
comp23871_c0	--	--	Cellular Component: plasma membrane (GO:0005886);; Biological Process: developmental process (GO:0032502);; Biological Process: single-multicellular organism process (GO:0044707);;	--	UPF0503 protein At3g09070, chloroplastic OS=Arabidopsis thaliana GN=At3g09070 PE=1 SV=1	PREDICTED: UPF0503 protein At3g09070, chloroplastic-like [Vitis vinifera]
comp14270_c0	--	--	Molecular Function: 2-alkenal reductase [NAD(P)] activity (GO:0032440);; Molecular Function: protein dimerization activity (GO:0046983);; Biological Process: oxidation-reduction process (GO:0055114);;	--	Transcription factor bHLH25 OS=Arabidopsis thaliana GN=BHLH25 PE=2 SV=2	hypothetical protein PRUPE_ppa007561mg [Prunus persica]
comp16036_c0	--	--	Cellular Component: mitochondrion (GO:0005739);;	--	Pentatricopeptide repeat-containing protein At1g06710, mitochondrial OS=Arabidopsis thaliana GN=At1g06710 PE=2 SV=1	unnamed protein product [Vitis vinifera]
comp4170_c0	[R]	General function prediction only	Cellular Component: extracellular region (GO:0005576);; Cellular Component: plastid (GO:0009536);;	--	Alpha/beta hydrolase domain-containing protein 17B OS=Homo sapiens GN=ABHD17B PE=2 SV=1	PREDICTED: abhydrolase domain-containing protein FAM108B1-like [Cucumis sativus]
comp3617_c0	[C]	Energy production and conversion	--	--	Copper transport protein CCH OS=Arabidopsis thaliana GN=CCH PE=1 SV=1	PREDICTED: uncharacterized protein LOC100243595 [Vitis vinifera]
comp6145_c0	[F]	Nucleotide transport and metabolism	Molecular Function: ribonucleoside-diphosphate reductase activity, thioredoxin disulfide as acceptor (GO:0004748);; Cellular Component: cytosol (GO:0005829);; Cellular Component: ribonucleoside-diphosphate reductase complex (GO:0005971);; Biological Process: DNA repair (GO:0006281);; Biological Process: multicellular organismal development (GO:0007275);; Biological Process: deoxyribonucleoside di…	K10808|2e-55|pop:POPTR_872567|ribonucleoside-diphosphate reductase (EC:1.17.4.1)	Ribonucleoside-diphosphate reductase small chain A OS=Arabidopsis thaliana GN=RNR2A PE=1 SV=2	predicted protein [Populus trichocarpa]
comp10514_c0	[J]	Translation, ribosomal structure and biogenesis	Molecular Function: structural constituent of ribosome (GO:0003735);; Cellular Component: ribosome (GO:0005840);; Biological Process: DNA-templated transcription, elongation (GO:0006354);; Biological Process: translation (GO:0006412);; Cellular Component: plastid (GO:0009536);;	--	50S ribosomal protein L18 OS=Aromatoleum aromaticum (strain EbN1) GN=rplR PE=3 SV=1	unknown [Lotus japonicus]
comp1990_c0	[O]	Posttranslational modification, protein turnover, chaperones	Biological Process: proteolysis (GO:0006508);; Molecular Function: peptidase activity (GO:0008233);; Cellular Component: cytoplasmic membrane-bounded vesicle (GO:0016023);; Molecular Function: metal ion binding (GO:0046872);;	--	E3 ubiquitin-protein ligase RNF13 OS=Bos taurus GN=RNF13 PE=2 SV=1	PREDICTED: E3 ubiquitin-protein ligase RNF167-like [Vitis vinifera]
comp462_c0	[J]	Translation, ribosomal structure and biogenesis	Molecular Function: structural constituent of ribosome (GO:0003735);; Cellular Component: nucleolus (GO:0005730);; Biological Process: translation (GO:0006412);; Cellular Component: cytosolic small ribosomal subunit (GO:0022627);;	K02973|7e-97|rcu:RCOM_0819610|40S ribosomal protein S23, putative	40S ribosomal protein S23 OS=Fragaria ananassa GN=RPS23 PE=2 SV=1	putative ribosomal S23 protein [Wolffia arrhiza]
comp5712_c0	[R]	General function prediction only	Cellular Component: chloroplast (GO:0009507);; Biological Process: chlorophyll catabolic process (GO:0015996);; Molecular Function: pheophytinase activity (GO:0080124);;	--	Abhydrolase domain-containing protein 4 OS=Homo sapiens GN=ABHD4 PE=2 SV=1	PREDICTED: uncharacterized protein LOC100265442 [Vitis vinifera]
comp343_c0	[J]	Translation, ribosomal structure and biogenesis	Molecular Function: translation initiation factor activity (GO:0003743);; Biological Process: translational initiation (GO:0006413);;	K03236|1e-103|vvi:100252402|hypothetical protein LOC100252402	Eukaryotic translation initiation factor 1A OS=Onobrychis viciifolia PE=2 SV=2	PREDICTED: eukaryotic translation initiation factor 1A-like [Vitis vinifera]
comp13117_c0	--	--	Cellular Component: mitochondrion (GO:0005739);;	--	Uncharacterized protein DKFZp434B061 OS=Homo sapiens PE=2 SV=2	conserved hypothetical protein [Ricinus communis]
comp29641_c0	--	--	--	--	--	NAC-like protein 13 [Crocus sativus]
comp2823_c0	--	--	Cellular Component: intracellular membrane-bounded organelle (GO:0043231);; Cellular Component: cytoplasmic part (GO:0044444);;	--	Formin-like protein 20 OS=Arabidopsis thaliana GN=FH20 PE=2 SV=3	PREDICTED: uncharacterized protein LOC100254757 [Vitis vinifera]
comp11235_c0	[E]	Amino acid transport and metabolism	Molecular Function: transporter activity (GO:0005215);; Cellular Component: chloroplast envelope (GO:0009941);; Biological Process: polyamine transport (GO:0015846);; Molecular Function: polyamine binding (GO:0019808);; Cellular Component: periplasmic space (GO:0042597);; Molecular Function: metal ion binding (GO:0046872);;	--	Spermidine/putrescine-binding periplasmic protein OS=Salmonella typhimurium (strain LT2 / SGSC1412 / ATCC 700720) GN=potD PE=3 SV=1	hypothetical protein PRUPE_ppa003616mg [Prunus persica]
comp44416_c0	--	--	--	--	--	hypothetical protein VITISV_042752 [Vitis vinifera]
comp1962_c0	[R]	General function prediction only	Cellular Component: plastid (GO:0009536);; Molecular Function: oxidoreductase activity (GO:0016491);; Biological Process: oxidation-reduction process (GO:0055114);;	--	Uncharacterized oxidoreductase At4g09670 OS=Arabidopsis thaliana GN=At4g09670 PE=1 SV=1	hypothetical protein SORBIDRAFT_01g022490 [Sorghum bicolor]
comp27835_c0	--	--	Molecular Function: sequence-specific DNA binding transcription factor activity (GO:0003700);; Cellular Component: nucleus (GO:0005634);; Biological Process: regulation of transcription, DNA-templated (GO:0006355);; Biological Process: toxin catabolic process (GO:0009407);; Biological Process: response to heat (GO:0009408);; Molecular Function: sequence-specific DNA binding (GO:0043565);;	--	Heat stress transcription factor C-2a OS=Oryza sativa subsp. japonica GN=HSFC2A PE=2 SV=1	heat shock factor protein 1 [Zea mays]
comp2795_c0	--	--	Cellular Component: integral component of membrane (GO:0016021);; Cellular Component: cytoplasmic membrane-bounded vesicle (GO:0016023);;	--	Transmembrane protein 56-B OS=Xenopus laevis GN=tmem56-b PE=2 SV=1	PREDICTED: transmembrane protein 56-like [Setaria italica]
comp14772_c0	--	--	--	K12823|1e-13|vvi:100260348|hypothetical protein LOC100260348	DEAD-box ATP-dependent RNA helicase 30 OS=Oryza sativa subsp. japonica GN=Os01g0911100 PE=2 SV=2	PREDICTED: DEAD-box ATP-dependent RNA helicase 30-like [Vitis vinifera]
comp6594_c0	--	--	Molecular Function: RNA polymerase II transcription cofactor activity (GO:0001104);; Biological Process: regulation of transcription from RNA polymerase II promoter (GO:0006357);; Cellular Component: mediator complex (GO:0016592);;	--	Mediator of RNA polymerase II transcription subunit 7a OS=Arabidopsis thaliana GN=MED7A PE=1 SV=1	hypothetical protein PRUPE_ppa014622mg [Prunus persica]
comp7985_c0	--	--	Biological Process: carotenoid biosynthetic process (GO:0016117);; Biological Process: carotene biosynthetic process (GO:0016120);; Molecular Function: oxidoreductase activity, acting on paired donors, with incorporation or reduction of molecular oxygen (GO:0016705);; Molecular Function: lycopene beta cyclase activity (GO:0045436);; Molecular Function: capsanthin synthase activity (GO:0052727);; …	K06443|0.0|vvi:100252133|hypothetical protein LOC100252133	Lycopene beta cyclase, chloroplastic/chromoplastic OS=Capsicum annuum GN=LCY1 PE=2 SV=1	PREDICTED: lycopene beta cyclase, chloroplastic [Vitis vinifera]
comp7828_c0	--	--	Molecular Function: nucleic acid binding (GO:0003676);; Biological Process: shoot system development (GO:0048367);;	--	Poly(rC)-binding protein 2 OS=Mus musculus GN=Pcbp2 PE=1 SV=1	PREDICTED: KH domain-containing protein At4g18375 isoform 1 [Vitis vinifera]
comp19621_c0	--	--	--	--	Uncharacterized protein LOC284861 OS=Homo sapiens PE=2 SV=1	unnamed protein product [Vitis vinifera]
comp3415_c0	[U]	Intracellular trafficking, secretion, and vesicular transport	--	--	HVA22-like protein k OS=Arabidopsis thaliana GN=HVA22K PE=2 SV=1	uncharacterized protein LOC100811809 [Glycine max]
comp1476_c0	--	--	Biological Process: RNA splicing, via endonucleolytic cleavage and ligation (GO:0000394);; Cellular Component: mitochondrion (GO:0005739);; Biological Process: methionine biosynthetic process (GO:0009086);;	--	--	PREDICTED: 54S ribosomal protein L37, mitochondrial-like [Vitis vinifera]
comp6536_c0	[KL]	--	Biological Process: nuclear-transcribed mRNA catabolic process (GO:0000956);; Molecular Function: DNA binding (GO:0003677);; Molecular Function: helicase activity (GO:0004386);; Molecular Function: ATP binding (GO:0005524);; Cellular Component: nucleus (GO:0005634);; Biological Process: DNA methylation (GO:0006306);; Biological Process: methylation-dependent chromatin silencing (GO:0006346);; Bio…	K11665|0.0|vvi:100250397|hypothetical protein LOC100250397	DNA helicase INO80 OS=Arabidopsis thaliana GN=INO80 PE=2 SV=2	PREDICTED: DNA helicase INO80-like [Vitis vinifera]
comp12373_c0	--	--	Biological Process: response to stimulus (GO:0050896);;	K14488|7e-34|rcu:RCOM_1611000|Auxin-induced protein X10A, putative	Auxin-induced protein X10A OS=Glycine max PE=2 SV=1	PREDICTED: uncharacterized protein LOC101300951 [Fragaria vesca subsp. vesca]
comp1753_c0	--	--	--	--	Translation initiation factor IF-2 OS=Anaeromyxobacter dehalogenans (strain 2CP-1 / ATCC BAA-258) GN=infB PE=3 SV=1	hypothetical protein ZEAMMB73_730622 [Zea mays]
comp31321_c0	--	--	Molecular Function: magnesium ion transmembrane transporter activity (GO:0015095);; Biological Process: magnesium ion transport (GO:0015693);; Cellular Component: membrane (GO:0016020);; Biological Process: transmembrane transport (GO:0055085);;	--	Magnesium transporter MRS2-2 OS=Arabidopsis thaliana GN=MRS2-2 PE=2 SV=1	unnamed protein product [Vitis vinifera]
comp6680_c0	[O]	Posttranslational modification, protein turnover, chaperones	Molecular Function: cysteine-type endopeptidase activity (GO:0004197);; Molecular Function: ubiquitin thiolesterase activity (GO:0004221);; Cellular Component: nucleus (GO:0005634);; Biological Process: ubiquitin-dependent protein catabolic process (GO:0006511);;	K11835|0.0|vvi:100259769|similar to ubiquitin carboxyl-terminal hydrolase family protein	Ubiquitin carboxyl-terminal hydrolase 10 OS=Arabidopsis thaliana GN=UBP10 PE=2 SV=2	PREDICTED: ubiquitin carboxyl-terminal hydrolase 9-like [Vitis vinifera]
comp28967_c0	--	--	Molecular Function: nucleotide binding (GO:0000166);; Molecular Function: RNA binding (GO:0003723);; Cellular Component: nucleus (GO:0005634);; Biological Process: mitosis (GO:0007067);; Molecular Function: zinc ion binding (GO:0008270);; Biological Process: photoperiodism, flowering (GO:0048573);;	K12836|2e-34|vvi:100266834|hypothetical protein LOC100266834	Splicing factor U2af small subunit A OS=Arabidopsis thaliana GN=U2AF35A PE=1 SV=1	PREDICTED: splicing factor U2af small subunit B-like [Cucumis sativus]
comp14341_c0	--	--	--	--	NAC transcription factor 29 OS=Arabidopsis thaliana GN=NAC029 PE=2 SV=1	hypothetical protein PRUPE_ppa009530mg [Prunus persica]
comp9166_c0	--	--	Biological Process: fatty acid biosynthetic process (GO:0006633);; Biological Process: response to cold (GO:0009409);; Biological Process: response to light stimulus (GO:0009416);; Cellular Component: membrane (GO:0016020);; Molecular Function: transferase activity, transferring acyl groups other than amino-acyl groups (GO:0016747);;	--	3-ketoacyl-CoA synthase 11 OS=Arabidopsis thaliana GN=KCS11 PE=2 SV=1	PREDICTED: 3-ketoacyl-CoA synthase 11 [Vitis vinifera]
comp1090_c0	--	--	Biological Process: rRNA processing (GO:0006364);; Cellular Component: PSII associated light-harvesting complex II (GO:0009517);; Cellular Component: chloroplast stromal thylakoid (GO:0009533);; Biological Process: response to blue light (GO:0009637);; Biological Process: response to high light intensity (GO:0009644);; Biological Process: response to sucrose (GO:0009744);; Biological Process: pho…	K08916|1e-149|vvi:100246457|hypothetical protein LOC100246457	Chlorophyll a-b binding protein CP26, chloroplastic OS=Arabidopsis thaliana GN=LHCB5 PE=2 SV=1	PREDICTED: chlorophyll a-b binding protein CP26, chloroplastic [Vitis vinifera]
comp19328_c0	--	--	Molecular Function: signal transducer activity (GO:0004871);; Cellular Component: extracellular region (GO:0005576);; Biological Process: polyamine catabolic process (GO:0006598);; Biological Process: cell communication (GO:0007154);; Cellular Component: plasmodesma (GO:0009506);; Biological Process: phenylpropanoid metabolic process (GO:0009698);; Biological Process: cellular modified amino acid…	--	Protein RALF-like 22 OS=Arabidopsis thaliana GN=RALFL22 PE=3 SV=1	PREDICTED: uncharacterized protein LOC100267454 [Vitis vinifera]
comp5031_c0	[U]	Intracellular trafficking, secretion, and vesicular transport	Cellular Component: Golgi apparatus (GO:0005794);; Cellular Component: cis-Golgi network (GO:0005801);; Biological Process: ER to Golgi vesicle-mediated transport (GO:0006888);; Biological Process: myo-inositol hexakisphosphate biosynthetic process (GO:0010264);;	--	Trafficking protein particle complex subunit 4 OS=Dictyostelium discoideum GN=trappc4 PE=3 SV=1	PREDICTED: trafficking protein particle complex subunit 4 [Vitis vinifera]
comp4497_c1	--	--	Biological Process: pentose-phosphate shunt (GO:0006098);; Cellular Component: chloroplast thylakoid membrane (GO:0009535);; Cellular Component: chloroplast stroma (GO:0009570);; Cellular Component: chloroplast envelope (GO:0009941);; Biological Process: isopentenyl diphosphate biosynthetic process, methylerythritol 4-phosphate pathway (GO:0019288);; Biological Process: metal ion transport (GO:00…	--	--	PREDICTED: uncharacterized protein LOC100264617 [Vitis vinifera]
comp1374_c0	--	--	Biological Process: macromolecule localization (GO:0033036);; Biological Process: single-organism cellular process (GO:0044763);; Biological Process: single-organism transport (GO:0044765);; Biological Process: regulation of biological process (GO:0050789);; Biological Process: organic substance transport (GO:0071702);;	--	Probable non-specific lipid-transfer protein AKCS9 OS=Vigna unguiculata PE=2 SV=1	Os05g0550300 [Oryza sativa Japonica Group]
comp44256_c0	[L]	Replication, recombination and repair	Molecular Function: RNA binding (GO:0003723);; Molecular Function: RNA-directed DNA polymerase activity (GO:0003964);; Biological Process: RNA-dependent DNA replication (GO:0006278);; Biological Process: DNA integration (GO:0015074);;	--	Retrotransposable element Tf2 155 kDa protein type 3 OS=Schizosaccharomyces pombe (strain 972 / ATCC 24843) GN=Tf2-11 PE=4 SV=1	Uncharacterized protein TCM_013849 [Theobroma cacao]
comp9905_c0	--	--	Biological Process: microtubule cytoskeleton organization (GO:0000226);; Biological Process: cytokinesis by cell plate formation (GO:0000911);; Cellular Component: nucleus (GO:0005634);; Cellular Component: cytosol (GO:0005829);; Biological Process: starch metabolic process (GO:0005982);; Biological Process: trehalose metabolic process (GO:0005991);; Biological Process: virus induced gene silenci…	--	HEAT repeat-containing protein 5B OS=Xenopus tropicalis GN=heatr5b PE=2 SV=1	PREDICTED: HEAT repeat-containing protein 5B-like [Vitis vinifera]
comp16871_c0	--	--	--	--	Extensin OS=Nicotiana tabacum GN=HRGPNT3 PE=2 SV=1	hydroxyproline-rich glycoprotein DZ-HRGP [Volvox carteri f. nagariensis]
comp36602_c0	--	--	--	--	--	unnamed protein product [Vitis vinifera]
comp21946_c0	[O]	Posttranslational modification, protein turnover, chaperones	Molecular Function: GTPase activity (GO:0003924);; Molecular Function: GTP binding (GO:0005525);; Biological Process: GTP catabolic process (GO:0006184);; Biological Process: small GTPase mediated signal transduction (GO:0007264);; Cellular Component: membrane (GO:0016020);;	--	Extensin OS=Zea mays GN=HRGP PE=2 SV=1	hypothetical protein MYCGRDRAFT_88109 [Zymoseptoria tritici IPO323]
comp26338_c0	--	--	Molecular Function: catalytic activity (GO:0003824);; Molecular Function: organic cyclic compound binding (GO:0097159);; Molecular Function: heterocyclic compound binding (GO:1901363);;	--	--	hypothetical protein VITISV_008912 [Vitis vinifera]
comp20905_c0	[L]	Replication, recombination and repair	Molecular Function: DNA binding (GO:0003677);; Molecular Function: RNA binding (GO:0003723);; Molecular Function: RNA-directed DNA polymerase activity (GO:0003964);; Molecular Function: aspartic-type endopeptidase activity (GO:0004190);; Biological Process: RNA-dependent DNA replication (GO:0006278);; Biological Process: DNA recombination (GO:0006310);; Biological Process: proteolysis (GO:0006508…	--	Retrovirus-related Pol polyprotein from transposon 17.6 OS=Drosophila melanogaster GN=pol PE=4 SV=1	hypothetical protein PRUPE_ppa021229mg [Prunus persica]
comp15891_c0	--	--	--	--	Transcription factor PIF1 OS=Arabidopsis thaliana GN=PIF1 PE=1 SV=1	predicted protein [Populus trichocarpa]
comp5208_c0	--	--	Molecular Function: actin binding (GO:0003779);; Cellular Component: actin cytoskeleton (GO:0015629);; Biological Process: actin filament depolymerization (GO:0030042);;	--	Actin-depolymerizing factor 5 OS=Oryza sativa subsp. japonica GN=ADF5 PE=2 SV=1	PREDICTED: actin-depolymerizing factor 5 [Vitis vinifera]
comp21513_c0	--	--	Cellular Component: membrane (GO:0016020);;	--	Probable peptide/nitrate transporter At1g62200 OS=Arabidopsis thaliana GN=At1g62200 PE=2 SV=1	TPA: hypothetical protein ZEAMMB73_657087 [Zea mays]
comp8336_c0	[Q]	Secondary metabolites biosynthesis, transport and catabolism	Molecular Function: catalytic activity (GO:0003824);; Biological Process: posttranscriptional gene silencing by RNA (GO:0035194);; Cellular Component: intracellular membrane-bounded organelle (GO:0043231);; Cellular Component: cytoplasmic part (GO:0044444);; Biological Process: production of small RNA involved in gene silencing by RNA (GO:0070918);;	K00142|0.0|vvi:100244930|hypothetical protein LOC100244930	Putative acyl-activating enzyme 19 OS=Arabidopsis thaliana GN=At5g35930 PE=2 SV=1	PREDICTED: acyl-CoA synthetase family member 4 [Vitis vinifera]
comp10651_c0	[S]	Function unknown	Cellular Component: membrane (GO:0016020);; Molecular Function: kinase activity (GO:0016301);;	--	Probable leucine-rich repeat receptor-like protein kinase At1g35710 OS=Arabidopsis thaliana GN=At1g35710 PE=2 SV=1	Leucine-rich repeat receptor-like protein kinase family protein, putative [Theobroma cacao]
comp9504_c0	--	--	Molecular Function: polygalacturonase activity (GO:0004650);; Cellular Component: extracellular region (GO:0005576);; Biological Process: carbohydrate metabolic process (GO:0005975);;	--	Polygalacturonase At1g48100 OS=Arabidopsis thaliana GN=At1g48100 PE=2 SV=1	polygalacturonase 5 [Oncidium hybrid cultivar]
comp28825_c0	--	--	Molecular Function: metal ion binding (GO:0046872);;	--	Uncharacterized protein UL61 OS=Human cytomegalovirus (strain AD169) GN=UL61 PE=4 SV=1	PREDICTED: uncharacterized protein LOC100252085 [Vitis vinifera]
comp6649_c0	--	--	Cellular Component: mitochondrion (GO:0005739);;	--	Leukocyte receptor cluster member 8 homolog OS=Xenopus laevis GN=leng8 PE=2 SV=1	unnamed protein product [Vitis vinifera]
comp18597_c0	--	--	Biological Process: microtubule cytoskeleton organization (GO:0000226);; Biological Process: double-strand break repair via homologous recombination (GO:0000724);; Biological Process: cytokinesis by cell plate formation (GO:0000911);; Cellular Component: Golgi apparatus (GO:0005794);; Biological Process: response to water deprivation (GO:0009414);; Biological Process: response to salt stress (GO:…	K00770|1e-93|vvi:100243459|hypothetical protein LOC100243459	Cellulose synthase-like protein D5 OS=Arabidopsis thaliana GN=CSLD5 PE=2 SV=1	hypothetical protein VITISV_021619 [Vitis vinifera]
comp764_c0	[R]	General function prediction only	Molecular Function: nucleotide binding (GO:0000166);; Molecular Function: nucleic acid binding (GO:0003676);; Cellular Component: mitochondrion (GO:0005739);; Cellular Component: plastid (GO:0009536);;	--	Glycine-rich RNA-binding protein 2, mitochondrial OS=Arabidopsis thaliana GN=RBG2 PE=1 SV=1	PREDICTED: nucleolin-like isoform 1 [Solanum lycopersicum]
comp41613_c0	--	--	--	--	--	electron transporter, putative [Ricinus communis]
comp5695_c0	--	--	--	K04392|2e-08|pop:POPTR_831315|hypothetical protein	Rac-like GTP-binding protein ARAC3 OS=Arabidopsis thaliana GN=ARAC3 PE=1 SV=1	hypothetical protein PRUPE_ppa011737mg [Prunus persica]
comp4158_c0	[S]	Function unknown	Cellular Component: mitochondrion (GO:0005739);; Cellular Component: chloroplast (GO:0009507);;	--	Ubiquinol-cytochrome c reductase complex chaperone CBP3 homolog OS=Xenopus laevis GN=uqcc PE=2 SV=1	PREDICTED: ubiquinol-cytochrome c reductase complex chaperone CBP3 homolog [Vitis vinifera]
comp25750_c0	--	--	--	--	Histidine-rich glycoprotein (Fragment) OS=Oryctolagus cuniculus GN=HRG PE=1 SV=1	basic proline-rich protein, putative [Coccidioides posadasii C735 delta SOWgp]
comp17170_c0	--	--	Molecular Function: nucleic acid binding (GO:0003676);; Cellular Component: nucleus (GO:0005634);; Biological Process: negative gravitropism (GO:0009959);; Molecular Function: metal ion binding (GO:0046872);;	--	Translation initiation factor IF-2 OS=Mycobacterium vanbaalenii (strain DSM 7251 / PYR-1) GN=infB PE=3 SV=1	C2H2-like zinc finger protein [Theobroma cacao]
comp9392_c0	--	--	--	--	Auxilin-related protein 2 OS=Arabidopsis thaliana GN=At4g12770 PE=1 SV=1	PREDICTED: auxilin-related protein 2-like [Vitis vinifera]
comp2255_c0	[A]	RNA processing and modification	Biological Process: mRNA processing (GO:0006397);; Cellular Component: chloroplast (GO:0009507);;	K12828|0.0|vvi:100243186|similar to splicing factor, putative	Splicing factor 3B subunit 1 OS=Xenopus laevis GN=sf3b1 PE=2 SV=1	PREDICTED: splicing factor 3B subunit 1-like [Vitis vinifera]
comp5634_c0	--	--	Cellular Component: nucleus (GO:0005634);; Cellular Component: cytosol (GO:0005829);; Biological Process: gluconeogenesis (GO:0006094);; Biological Process: intracellular protein transport (GO:0006886);; Biological Process: cytoskeleton organization (GO:0007010);; Cellular Component: chloroplast (GO:0009507);; Biological Process: proteasomal protein catabolic process (GO:0010498);; Biological Pro…	--	Translational activator GCN1 OS=Homo sapiens GN=GCN1L1 PE=1 SV=6	PREDICTED: translational activator GCN1 isoform 1 [Vitis vinifera]
comp29877_c0	--	--	--	--	Serine carboxypeptidase-like 40 OS=Arabidopsis thaliana GN=SCPL40 PE=2 SV=2	predicted protein [Physcomitrella patens subsp. patens]
comp5486_c0	[H]	Coenzyme transport and metabolism	Molecular Function: biotin synthase activity (GO:0004076);; Cellular Component: mitochondrion (GO:0005739);; Biological Process: acetyl-CoA metabolic process (GO:0006084);; Biological Process: microtubule nucleation (GO:0007020);; Molecular Function: zinc ion binding (GO:0008270);; Biological Process: biotin biosynthetic process (GO:0009102);; Biological Process: regulation of meristem growth (GO…	K01012|0.0|vvi:100255986|hypothetical protein LOC100255986	Biotin synthase OS=Arabidopsis thaliana GN=BIO2 PE=2 SV=1	Radical SAM superfamily protein [Theobroma cacao]
comp2091_c0	--	--	Biological Process: pentose-phosphate shunt (GO:0006098);; Biological Process: rRNA processing (GO:0006364);; Cellular Component: plastid chromosome (GO:0009508);; Biological Process: response to abscisic acid (GO:0009737);; Biological Process: photosynthetic electron transport in photosystem I (GO:0009773);; Cellular Component: chloroplast envelope (GO:0009941);; Biological Process: thylakoid me…	--	Thylakoid membrane phosphoprotein 14 kDa, chloroplastic OS=Arabidopsis thaliana GN=TMP14 PE=1 SV=2	photosystem I P subunit [Arabidopsis thaliana]
comp6330_c0	--	--	--	--	Probable WRKY transcription factor 20 OS=Arabidopsis thaliana GN=WRKY20 PE=2 SV=1	PREDICTED: probable WRKY transcription factor 20-like [Vitis vinifera]
comp13566_c0	--	--	Biological Process: RNA splicing, via endonucleolytic cleavage and ligation (GO:0000394);; Molecular Function: calcium ion binding (GO:0005509);; Cellular Component: nucleus (GO:0005634);; Cellular Component: endosome (GO:0005768);; Cellular Component: Golgi apparatus (GO:0005794);; Cellular Component: trans-Golgi network (GO:0005802);; Cellular Component: plasma membrane (GO:0005886);; Biologica…	--	Uncharacterized TPR repeat-containing protein At1g05150 OS=Arabidopsis thaliana GN=At1g05150 PE=1 SV=1	hypothetical protein CARUB_v10012243mg [Capsella rubella]
comp1084_c0	[J]	Translation, ribosomal structure and biogenesis	Biological Process: single-organism cellular process (GO:0044763);;	--	Translation initiation factor IF-2 OS=Frankia alni (strain ACN14a) GN=infB PE=3 SV=1	hypothetical protein SORBIDRAFT_01g011230 [Sorghum bicolor]
comp4821_c0	[RTKL]	--	Molecular Function: protein serine/threonine kinase activity (GO:0004674);; Molecular Function: protein tyrosine kinase activity (GO:0004713);; Molecular Function: ATP binding (GO:0005524);; Cellular Component: cytosol (GO:0005829);; Cellular Component: plasma membrane (GO:0005886);; Biological Process: protein phosphorylation (GO:0006468);;	--	Serine/threonine-protein kinase HT1 OS=Arabidopsis thaliana GN=HT1 PE=1 SV=1	hypothetical protein VITISV_022074 [Vitis vinifera]
comp9603_c0	[J]	Translation, ribosomal structure and biogenesis	Molecular Function: structural constituent of ribosome (GO:0003735);; Cellular Component: mitochondrion (GO:0005739);; Cellular Component: ribosome (GO:0005840);; Biological Process: DNA-templated transcription, elongation (GO:0006354);; Biological Process: translation (GO:0006412);; Biological Process: ribosome biogenesis (GO:0042254);;	K02919|5e-32|vvi:100250810|hypothetical protein LOC100250810	50S ribosomal protein L36 OS=Synechocystis sp. (strain PCC 6803 / Kazusa) GN=rpmJ PE=3 SV=1	hypothetical protein VITISV_039227 [Vitis vinifera]
comp8510_c0	[F]	Nucleotide transport and metabolism	Molecular Function: CTP synthase activity (GO:0003883);; Cellular Component: cytoplasm (GO:0005737);; Biological Process: pyrimidine nucleotide biosynthetic process (GO:0006221);;	K01937|0.0|pop:POPTR_731738|CTP synthase (EC:6.3.4.2)	CTP synthase OS=Dictyostelium discoideum GN=ctps PE=3 SV=1	PREDICTED: CTP synthase-like isoform 1 [Fragaria vesca subsp. vesca]
comp7195_c0	--	--	Cellular Component: nucleus (GO:0005634);; Cellular Component: cytosol (GO:0005829);; Biological Process: regulation of protein ubiquitination (GO:0031396);; Molecular Function: identical protein binding (GO:0042802);; Biological Process: cellular response to salt stress (GO:0071472);;	--	BTB/POZ and MATH domain-containing protein 3 OS=Arabidopsis thaliana GN=BPM3 PE=1 SV=1	putative protein binding, partial [Elaeis guineensis]
comp10967_c0	--	--	Molecular Function: transferase activity, transferring glycosyl groups (GO:0016757);;	--	UDP-glycosyltransferase 85A2 OS=Arabidopsis thaliana GN=UGT85A2 PE=2 SV=1	PREDICTED: UDP-glycosyltransferase 85A3 [Vitis vinifera]
comp4076_c0	[DZ]	--	--	--	Ultraviolet-B receptor UVR8 OS=Arabidopsis thaliana GN=UVR8 PE=1 SV=1	PREDICTED: E3 ubiquitin-protein ligase HERC2 [Vitis vinifera]
comp16519_c0	--	--	--	--	Flocculation protein FLO11 OS=Saccharomyces cerevisiae (strain ATCC 204508 / S288c) GN=MUC1 PE=1 SV=2	hypothetical protein PRUPE_ppa003418mg [Prunus persica]
comp11988_c0	[O]	Posttranslational modification, protein turnover, chaperones	Biological Process: peptidyl-lysine modification to hypusine (GO:0008612);; Biological Process: embryo sac development (GO:0009553);; Molecular Function: deoxyhypusine synthase activity (GO:0034038);; Biological Process: deoxyhypusine biosynthetic process from spermidine (GO:0050983);;	K00809|0.0|osa:4334056|Os03g0740600	Deoxyhypusine synthase OS=Musa acuminata GN=DHS PE=2 SV=1	Os03g0740600 [Oryza sativa Japonica Group]
comp5821_c0	[H]	Coenzyme transport and metabolism	Molecular Function: protein binding (GO:0005515);; Molecular Function: ATP binding (GO:0005524);; Cellular Component: nucleus (GO:0005634);; Cellular Component: cytosol (GO:0005829);; Cellular Component: plasmodesma (GO:0009506);; Biological Process: embryo development ending in seed dormancy (GO:0009793);; Biological Process: protein sumoylation (GO:0016925);; Molecular Function: SUMO activating…	K10685|0.0|vvi:100253801|hypothetical protein LOC100253801	SUMO-activating enzyme subunit 2 OS=Arabidopsis thaliana GN=SAE2 PE=1 SV=1	PREDICTED: SUMO-activating enzyme subunit 2-like [Vitis vinifera]
comp15024_c0	--	--	--	--	Proline-rich receptor-like protein kinase PERK2 OS=Arabidopsis thaliana GN=PERK2 PE=2 SV=3	hypothetical protein PDE_06843 [Penicillium oxalicum 114-2]
comp7996_c0	--	--	Cellular Component: nucleus (GO:0005634);; Biological Process: nucleobase-containing compound metabolic process (GO:0006139);; Biological Process: multicellular organismal development (GO:0007275);; Biological Process: macromolecule metabolic process (GO:0043170);;	--	Autophagy-related protein 2 OS=Cryptococcus neoformans var. neoformans serotype D (strain JEC21 / ATCC MYA-565) GN=ATG2 PE=3 SV=1	unnamed protein product [Vitis vinifera]
comp18956_c0	--	--	--	--	U-box domain-containing protein 12 OS=Oryza sativa subsp. japonica GN=PUB12 PE=2 SV=1	hypothetical protein PRUPE_ppa006790mg [Prunus persica]
comp15420_c0	--	--	--	--	Glucan endo-1,3-beta-glucosidase-like protein 3 OS=Arabidopsis thaliana GN=At5g08000 PE=1 SV=1	predicted protein [Populus trichocarpa]
comp7469_c0	--	--	--	--	Vegetative cell wall protein gp1 OS=Chlamydomonas reinhardtii GN=GP1 PE=2 SV=1	PREDICTED: uncharacterized protein LOC100254092 [Vitis vinifera]
comp2321_c0	[T]	Signal transduction mechanisms	Biological Process: activation of MAPKK activity (GO:0000186);; Molecular Function: MAP kinase kinase kinase activity (GO:0004709);; Molecular Function: protein serine/threonine phosphatase activity (GO:0004722);; Molecular Function: ATP binding (GO:0005524);; Molecular Function: metal ion binding (GO:0046872);;	--	Protein kinase and PP2C-like domain-containing protein OS=Oryza sativa subsp. japonica GN=Os01g0541900 PE=2 SV=1	PREDICTED: protein kinase and PP2C-like domain-containing protein isoform 1 [Vitis vinifera]
comp2620_c0	[J]	Translation, ribosomal structure and biogenesis	Molecular Function: tryptophan-tRNA ligase activity (GO:0004830);; Molecular Function: ATP binding (GO:0005524);; Cellular Component: cytosol (GO:0005829);; Biological Process: tryptophanyl-tRNA aminoacylation (GO:0006436);; Biological Process: nucleotide biosynthetic process (GO:0009165);;	K01867|0.0|vvi:100257528|hypothetical protein LOC100257528	Tryptophan--tRNA ligase, cytoplasmic OS=Homo sapiens GN=WARS PE=1 SV=2	PREDICTED: tryptophanyl-tRNA synthetase, cytoplasmic [Vitis vinifera]
comp24307_c0	--	--	Molecular Function: nucleic acid binding (GO:0003676);;	--	Uncharacterized protein BHLF1 OS=Epstein-Barr virus (strain B95-8) GN=BHLF1 PE=4 SV=1	PREDICTED: uncharacterized protein LOC100266895 [Vitis vinifera]
comp5214_c0	[S]	Function unknown	Biological Process: rRNA processing (GO:0006364);; Biological Process: unsaturated fatty acid biosynthetic process (GO:0006636);; Cellular Component: chloroplast thylakoid membrane (GO:0009535);; Cellular Component: chloroplast thylakoid lumen (GO:0009543);; Cellular Component: chloroplast stroma (GO:0009570);; Biological Process: thylakoid membrane organization (GO:0010027);; Biological Process:…	--	Thylakoid lumenal 17.4 kDa protein, chloroplastic OS=Arabidopsis thaliana GN=At5g53490 PE=1 SV=2	unnamed protein product [Vitis vinifera]
comp4709_c0	[J]	Translation, ribosomal structure and biogenesis	Molecular Function: structural constituent of ribosome (GO:0003735);; Cellular Component: ribosome (GO:0005840);; Biological Process: translation (GO:0006412);; Molecular Function: rRNA binding (GO:0019843);;	--	30S ribosomal protein S6 OS=Pseudomonas aeruginosa (strain ATCC 15692 / PAO1 / 1C / PRS 101 / LMG 12228) GN=rpsF PE=3 SV=1	hypothetical protein SORBIDRAFT_08g018320 [Sorghum bicolor]
comp2011_c0	[Q]	Secondary metabolites biosynthesis, transport and catabolism	Molecular Function: iron ion binding (GO:0005506);; Cellular Component: endoplasmic reticulum (GO:0005783);; Cellular Component: plasma membrane (GO:0005886);; Molecular Function: electron carrier activity (GO:0009055);; Biological Process: response to light stimulus (GO:0009416);; Cellular Component: plant-type cell wall (GO:0009505);; Biological Process: pollen development (GO:0009555);; Biolog…	K00487|0.0|rcu:RCOM_1164350|cinnamate 4-hydroxylase, putative (EC:1.14.13.11)	Trans-cinnamate 4-monooxygenase OS=Glycyrrhiza echinata GN=CYP73A14 PE=2 SV=1	cinnamate-4-hydroxylase [Gossypium arboreum]
comp43878_c0	--	--	Cellular Component: mitochondrion (GO:0005739);; Biological Process: response to stress (GO:0006950);; Molecular Function: hydrolase activity (GO:0016787);;	--	Protein ASPARTIC PROTEASE IN GUARD CELL 1 OS=Arabidopsis thaliana GN=ASPG1 PE=1 SV=1	unknown protein isoform 1 [Lemna minor]
comp13441_c0	--	--	Cellular Component: chloroplast stroma (GO:0009570);; Biological Process: chloroplast organization (GO:0009658);; Biological Process: chloroplast RNA processing (GO:0031425);; Biological Process: protein targeting to chloroplast (GO:0045036);; Biological Process: positive regulation of translation (GO:0045727);;	--	Pentatricopeptide repeat-containing protein At4g16390, chloroplastic OS=Arabidopsis thaliana GN=P67 PE=1 SV=3	Pentatricopeptide (PPR) repeat-containing protein [Theobroma cacao]
comp17368_c0	--	--	Biological Process: DNA metabolic process (GO:0006259);; Biological Process: chromatin silencing (GO:0006342);; Biological Process: cell cycle (GO:0007049);; Biological Process: histone lysine methylation (GO:0034968);;	--	Chitinase-like protein PB1E7.04c OS=Schizosaccharomyces pombe (strain 972 / ATCC 24843) GN=SPAPB1E7.04c PE=3 SV=1	PREDICTED: uncharacterized protein LOC100257807 [Vitis vinifera]
comp11756_c0	--	--	Cellular Component: nucleus (GO:0005634);; Biological Process: mRNA processing (GO:0006397);;	K12867|0.0|pop:POPTR_713683|hypothetical protein	Pre-mRNA-splicing factor SYF1 OS=Rattus norvegicus GN=Xab2 PE=2 SV=1	predicted protein [Populus trichocarpa]
comp13519_c1	--	--	Molecular Function: organic cyclic compound binding (GO:0097159);; Molecular Function: heterocyclic compound binding (GO:1901363);;	--	--	T4.15 [Malus x robusta]
comp38788_c0	--	--	--	--	Pentatricopeptide repeat-containing protein At2g27610 OS=Arabidopsis thaliana GN=PCMP-H60 PE=2 SV=1	unnamed protein product [Vitis vinifera]
comp40455_c0	--	--	Molecular Function: binding (GO:0005488);; Biological Process: metabolic process (GO:0008152);; Cellular Component: membrane (GO:0016020);; Cellular Component: cytoplasmic membrane-bounded vesicle (GO:0016023);; Molecular Function: kinase activity (GO:0016301);; Biological Process: response to stimulus (GO:0050896);;	--	Receptor-like protein kinase OS=Ipomoea nil GN=INRPK1 PE=2 SV=2	predicted protein [Populus trichocarpa]
comp40943_c0	--	--	--	K09422|4e-06|sbi:SORBI_04g026480|hypothetical protein	--	--
comp16324_c0	--	--	Cellular Component: membrane (GO:0016020);;	--	--	unnamed protein product [Vitis vinifera]
comp11612_c0	[H]	Coenzyme transport and metabolism	Biological Process: biosynthetic process (GO:0009058);; Molecular Function: hydrolase activity (GO:0016787);;	K01495|0.0|pop:POPTR_573397|GTP cyclohydrolase I (EC:3.5.4.16)	GTP cyclohydrolase 1 OS=Gloeobacter violaceus (strain PCC 7421) GN=folE PE=3 SV=1	GTP cyclohydrolase I [Theobroma cacao]
comp16288_c0	--	--	Molecular Function: ubiquitin-protein ligase activity (GO:0004842);; Cellular Component: nucleus (GO:0005634);; Cellular Component: cytosol (GO:0005829);; Biological Process: postreplication repair (GO:0006301);;	K10581|4e-18|ath:AT2G16920|UBC23	Probable ubiquitin-conjugating enzyme E2 23 OS=Arabidopsis thaliana GN=UBC23 PE=3 SV=1	putative ubiquitin-conjugating enzyme E2 23 [Arabidopsis thaliana]
comp3135_c0	[O]	Posttranslational modification, protein turnover, chaperones	Molecular Function: ATP binding (GO:0005524);; Biological Process: cellular iron ion homeostasis (GO:0006879);; Cellular Component: chloroplast (GO:0009507);; Biological Process: iron-sulfur cluster assembly (GO:0016226);; Biological Process: regulation of response to red or far red light (GO:2000030);;	--	UPF0051 protein ABCI8, chloroplastic OS=Arabidopsis thaliana GN=ABCI8 PE=2 SV=1	PREDICTED: UPF0051 protein ABCI8, chloroplastic [Vitis vinifera]
comp37306_c0	--	--	--	--	Retrovirus-related Pol polyprotein from transposon TNT 1-94 OS=Nicotiana tabacum PE=2 SV=1	hypothetical protein VITISV_026948 [Vitis vinifera]
comp10333_c0	--	--	Molecular Function: DNA binding (GO:0003677);; Molecular Function: sequence-specific DNA binding transcription factor activity (GO:0003700);; Cellular Component: nucleus (GO:0005634);; Biological Process: regulation of transcription, DNA-templated (GO:0006355);;	K09287|2e-93|osa:4339522|Os05g0549800	AP2/ERF and B3 domain-containing protein Os05g0549800 OS=Oryza sativa subsp. japonica GN=Os05g0549800 PE=2 SV=1	Os05g0549800 [Oryza sativa Japonica Group]
comp2350_c0	--	--	Molecular Function: inositol hexakisphosphate binding (GO:0000822);; Biological Process: auxin-activated signaling pathway (GO:0009734);;	--	Protein TRANSPORT INHIBITOR RESPONSE 1 OS=Arabidopsis thaliana GN=TIR1 PE=1 SV=2	f-box family protein [Populus trichocarpa]
comp1988_c0	--	--	Cellular Component: cytoplasmic membrane-bounded vesicle (GO:0016023);;	--	--	PREDICTED: uncharacterized protein LOC100527671 [Glycine max]
comp10048_c0	--	--	Cellular Component: nucleus (GO:0005634);; Cellular Component: chloroplast (GO:0009507);; Biological Process: photosystem II assembly (GO:0010207);; Cellular Component: membrane (GO:0016020);; Biological Process: mRNA modification (GO:0016556);;	--	Protein PAM68, chloroplastic OS=Arabidopsis thaliana GN=PAM68 PE=1 SV=1	PAM68, chloroplastic, putative isoform 3 [Theobroma cacao]
comp13664_c0	[U]	Intracellular trafficking, secretion, and vesicular transport	Cellular Component: mitochondrion (GO:0005739);;	--	Protein translocase subunit SecA 1 OS=Alkaliphilus metalliredigens (strain QYMF) GN=secA1 PE=3 SV=1	predicted protein [Populus trichocarpa]
comp2034_c0	--	--	Biological Process: RNA processing (GO:0006396);;	--	Cleavage stimulation factor subunit 2 OS=Mus musculus GN=Cstf2 PE=1 SV=2	Hydroxyproline-rich glycoprotein family protein, putative isoform 1 [Theobroma cacao]
comp14385_c0	--	--	Molecular Function: catalytic activity (GO:0003824);;	--	--	hypothetical protein VITISV_036307 [Vitis vinifera]
comp4837_c0	[O]	Posttranslational modification, protein turnover, chaperones	Molecular Function: glutathione transferase activity (GO:0004364);;	K00799|1e-123|vvi:100260869|hypothetical protein LOC100260869	Glutathione S-transferase F8, chloroplastic OS=Arabidopsis thaliana GN=GSTF8 PE=2 SV=3	PREDICTED: glutathione S-transferase PARB [Vitis vinifera]
comp13296_c0	[J]	Translation, ribosomal structure and biogenesis	Biological Process: RNA methylation (GO:0001510);; Molecular Function: RNA binding (GO:0003723);; Cellular Component: mitochondrion (GO:0005739);; Biological Process: RNA processing (GO:0006396);; Molecular Function: tRNA (guanosine-2'-O-)-methyltransferase activity (GO:0009020);; Cellular Component: chloroplast (GO:0009507);;	--	tRNA (guanosine(18)-2&apos;-O)-methyltransferase OS=Aquifex aeolicus (strain VF5) GN=trmH PE=1 SV=1	TRNA/rRNA methyltransferase family protein [Theobroma cacao]
comp504_c0	--	--	Molecular Function: cytochrome-c oxidase activity (GO:0004129);; Cellular Component: mitochondrial respiratory chain complex IV (GO:0005751);;	K02266|2e-47|osa:4334266|Os03g0772800	Cytochrome c oxidase subunit 6a, mitochondrial OS=Arabidopsis thaliana GN=COX6A PE=2 SV=1	Os03g0772800 [Oryza sativa Japonica Group]
comp6428_c0	[J]	Translation, ribosomal structure and biogenesis	--	--	Serine/arginine repetitive matrix protein 1 OS=Gallus gallus GN=SRRM1 PE=2 SV=1	PREDICTED: atherin-like [Setaria italica]
comp31124_c0	--	--	--	--	Putative ribonuclease H protein At1g65750 OS=Arabidopsis thaliana GN=At1g65750 PE=3 SV=1	hypothetical protein VITISV_029750 [Vitis vinifera]
comp29377_c0	--	--	Molecular Function: sequence-specific DNA binding transcription factor activity (GO:0003700);; Biological Process: regulation of transcription, DNA-templated (GO:0006355);; Cellular Component: plastid (GO:0009536);; Molecular Function: sequence-specific DNA binding (GO:0043565);;	--	Probable WRKY transcription factor 50 OS=Arabidopsis thaliana GN=WRKY50 PE=2 SV=1	WRKY7 - superfamily of TFs having WRKY and zinc finger domains [Zea mays]
comp21529_c0	[D]	Cell cycle control, cell division, chromosome partitioning	--	--	Serine/threonine-protein phosphatase BSL2 homolog OS=Oryza sativa subsp. japonica GN=BSL2 PE=2 SV=2	PREDICTED: serine/threonine-protein phosphatase BSL3-like [Fragaria vesca subsp. vesca]
comp16496_c0	--	--	--	--	Pentatricopeptide repeat-containing protein At5g66520 OS=Arabidopsis thaliana GN=PCMP-H61 PE=2 SV=1	Pentatricopeptide repeat protein isoform 2 [Theobroma cacao]
comp5802_c0	[Z]	Cytoskeleton	Molecular Function: GTPase activity (GO:0003924);; Molecular Function: structural constituent of cytoskeleton (GO:0005200);; Molecular Function: GTP binding (GO:0005525);; Cellular Component: cell wall (GO:0005618);; Cellular Component: nucleolus (GO:0005730);; Cellular Component: vacuole (GO:0005773);; Cellular Component: Golgi apparatus (GO:0005794);; Cellular Component: microtubule (GO:0005874…	--	Tubulin beta-1 chain (Fragment) OS=Avena sativa GN=TUBB1 PE=2 SV=1	hypothetical protein M569_10002, partial [Genlisea aurea]
comp10534_c0	[GER]	--	Cellular Component: plastid (GO:0009536);; Cellular Component: membrane (GO:0016020);;	--	WAT1-related protein At5g47470 OS=Arabidopsis thaliana GN=At5g47470 PE=3 SV=1	Os06g0105700 [Oryza sativa Japonica Group]
comp25406_c0	--	--	--	--	Chitin-binding lectin 1 OS=Solanum tuberosum PE=1 SV=2	predicted protein [Ostreococcus lucimarinus CCE9901]
comp26885_c0	--	--	--	--	--	Os06g0632700 [Oryza sativa Japonica Group]
comp41499_c0	--	--	Biological Process: defense response (GO:0006952);; Biological Process: regulation of cellular process (GO:0050794);; Biological Process: response to other organism (GO:0051707);; Biological Process: cellular response to stimulus (GO:0051716);;	K13459|3e-11|vvi:100254298|hypothetical protein LOC100254298	Probable disease resistance protein At4g27220 OS=Arabidopsis thaliana GN=At4g27220 PE=2 SV=1	PREDICTED: uncharacterized protein LOC101314254 [Fragaria vesca subsp. vesca]
comp354_c1	[U]	Intracellular trafficking, secretion, and vesicular transport	Cellular Component: mitochondrion (GO:0005739);; Biological Process: protein transport (GO:0015031);; Cellular Component: membrane (GO:0016020);; Cellular Component: cytoplasmic membrane-bounded vesicle (GO:0016023);;	K10956|0.0|osa:4346811|Os09g0347700	Protein transport protein Sec61 subunit alpha OS=Dictyostelium discoideum GN=sec61a PE=3 SV=1	Os09g0347700 [Oryza sativa Japonica Group]
comp11304_c0	--	--	--	--	B3 domain-containing protein Os11g0197600 OS=Oryza sativa subsp. japonica GN=Os11g0197600 PE=2 SV=1	DSBA oxidoreductase family protein isoform 1 [Theobroma cacao]
comp13990_c0	--	--	--	--	EPIDERMAL PATTERNING FACTOR-like protein 2 OS=Arabidopsis thaliana GN=EPFL2 PE=2 SV=1	hypothetical protein VITISV_037684 [Vitis vinifera]
comp8657_c0	[C]	Energy production and conversion	Biological Process: glycerol metabolic process (GO:0006071);; Biological Process: lipid metabolic process (GO:0006629);; Molecular Function: glycerophosphodiester phosphodiesterase activity (GO:0008889);;	--	--	PREDICTED: uncharacterized protein LOC100251767 [Vitis vinifera]
comp11300_c1	--	--	Molecular Function: binding (GO:0005488);; Cellular Component: nucleus (GO:0005634);; Biological Process: transcription, DNA-templated (GO:0006351);;	--	Barley B recombinant-like protein D OS=Oryza sativa subsp. japonica GN=Os06g0130600 PE=2 SV=1	GAGA-binding transcriptional activator BBR/BPC6-like [Vitis vinifera]
comp36680_c0	--	--	Biological Process: metabolic process (GO:0008152);; Molecular Function: hydrolase activity (GO:0016787);; Molecular Function: ion binding (GO:0043167);;	--	Uncharacterized mitochondrial protein AtMg00310 OS=Arabidopsis thaliana GN=AtMg00310 PE=4 SV=1	hypothetical protein VITISV_019647 [Vitis vinifera]
comp5118_c0	--	--	Cellular Component: mitochondrion (GO:0005739);; Biological Process: defense response (GO:0006952);; Molecular Function: zinc ion binding (GO:0008270);; Molecular Function: ADP binding (GO:0043531);;	--	E3 ubiquitin-protein ligase RLIM OS=Mus musculus GN=Rlim PE=1 SV=2	Os06g0695600 [Oryza sativa Japonica Group]
comp20993_c0	--	--	--	--	Probable non-specific lipid-transfer protein AKCS9 OS=Vigna unguiculata PE=2 SV=1	Os01g0691300 [Oryza sativa Japonica Group]
comp1494_c0	--	--	Cellular Component: proteasome complex (GO:0000502);;	K10881|3e-33|sbi:SORBI_03g010810|hypothetical protein	Probable 26S proteasome complex subunit sem1-1 OS=Arabidopsis thaliana GN=At1g64750 PE=1 SV=1	hypothetical protein SORBIDRAFT_03g010810 [Sorghum bicolor]
comp40302_c0	--	--	Molecular Function: nucleic acid binding (GO:0003676);; Biological Process: DNA metabolic process (GO:0006259);; Molecular Function: transferase activity, transferring phosphorus-containing groups (GO:0016772);; Molecular Function: metal ion binding (GO:0046872);;	--	Retrovirus-related Pol polyprotein from transposon TNT 1-94 OS=Nicotiana tabacum PE=2 SV=1	PREDICTED: uncharacterized protein LOC100795634 [Glycine max]
comp2698_c0	--	--	--	--	Serine/arginine repetitive matrix protein 1 OS=Gallus gallus GN=SRRM1 PE=2 SV=1	PREDICTED: uncharacterized protein LOC100262348 [Vitis vinifera]
comp23797_c0	--	--	Cellular Component: endoplasmic reticulum (GO:0005783);; Cellular Component: plasma membrane (GO:0005886);; Biological Process: response to cold (GO:0009409);; Molecular Function: cellulose synthase (UDP-forming) activity (GO:0016760);; Cellular Component: integral component of Golgi membrane (GO:0030173);; Biological Process: cellulose biosynthetic process (GO:0030244);; Biological Process: root…	--	Cellulose synthase-like protein D3 OS=Arabidopsis thaliana GN=CSLD3 PE=1 SV=1	unnamed protein product [Vitis vinifera]
comp44821_c0	--	--	Molecular Function: ATP binding (GO:0005524);; Biological Process: embryo development ending in seed dormancy (GO:0009793);;	--	Pentatricopeptide repeat-containing protein At4g33990 OS=Arabidopsis thaliana GN=EMB2758 PE=3 SV=2	hypothetical protein PRUPE_ppa002176mg [Prunus persica]
comp5476_c0	[T]	Signal transduction mechanisms	Cellular Component: protein phosphatase type 2A complex (GO:0000159);; Molecular Function: nucleotide binding (GO:0000166);; Cellular Component: cytosol (GO:0005829);; Biological Process: protein dephosphorylation (GO:0006470);; Biological Process: signal transduction (GO:0007165);; Molecular Function: protein phosphatase type 2A regulator activity (GO:0008601);;	--	Serine/threonine protein phosphatase 2A 55 kDa regulatory subunit B beta isoform OS=Arabidopsis thaliana GN=PP2AB2 PE=2 SV=1	protein phosphatase pp2a regulatory subunit B, putative [Ricinus communis]
comp3087_c0	[O]	Posttranslational modification, protein turnover, chaperones	Molecular Function: ubiquitin-protein ligase activity (GO:0004842);; Biological Process: protein ubiquitination (GO:0016567);;	K10576|1e-103|vvi:100253472|hypothetical protein LOC100253472	Ubiquitin-conjugating enzyme E2 4 OS=Arabidopsis thaliana GN=UBC4 PE=2 SV=2	PREDICTED: ubiquitin-conjugating enzyme E2 5 [Vitis vinifera]
comp29349_c0	--	--	--	--	--	PREDICTED: pentatricopeptide repeat-containing protein At1g74630-like [Fragaria vesca subsp. vesca]
comp20811_c0	--	--	Cellular Component: 1,3-beta-D-glucan synthase complex (GO:0000148);; Molecular Function: 1,3-beta-D-glucan synthase activity (GO:0003843);; Biological Process: (1->3)-beta-D-glucan biosynthetic process (GO:0006075);; Biological Process: microsporogenesis (GO:0009556);; Biological Process: phloem transport (GO:0010233);; Biological Process: callose deposition in cell wall (GO:0052543);; Biologica…	K11000|8e-83|ath:AT3G59100|ATGSL11 (glucan synthase-like 11)	Putative callose synthase 6 OS=Arabidopsis thaliana GN=CALS6 PE=3 SV=2	hypothetical protein ARALYDRAFT_470669 [Arabidopsis lyrata subsp. lyrata]
comp2236_c0	[R]	General function prediction only	Molecular Function: nucleotide binding (GO:0000166);; Molecular Function: RNA binding (GO:0003723);; Molecular Function: protein binding (GO:0005515);; Cellular Component: nucleolus (GO:0005730);; Cellular Component: cytoplasm (GO:0005737);; Biological Process: RNA processing (GO:0006396);; Biological Process: positive regulation of gene expression (GO:0010628);; Cellular Component: nuclear body …	K12876|1e-106|vvi:100260882|hypothetical protein LOC100260882	RNA-binding protein 8A OS=Danio rerio GN=rbm8a PE=2 SV=1	PREDICTED: RNA-binding protein 8A [Vitis vinifera]
comp10674_c0	--	--	Biological Process: nuclear-transcribed mRNA catabolic process (GO:0000956);; Molecular Function: nucleic acid binding (GO:0003676);; Cellular Component: nucleus (GO:0005634);; Biological Process: protein glycosylation (GO:0006486);; Cellular Component: plastid (GO:0009536);; Biological Process: hormone-mediated signaling pathway (GO:0009755);; Biological Process: sugar mediated signaling pathway…	--	DNA damage-binding protein 1 OS=Gallus gallus GN=DDB1 PE=2 SV=1	PREDICTED: pre-mRNA-splicing factor rse1-like [Vitis vinifera]
comp39896_c0	--	--	Cellular Component: cytoplasmic membrane-bounded vesicle (GO:0016023);; Molecular Function: oxidoreductase activity (GO:0016491);; Molecular Function: metal ion binding (GO:0046872);;	--	Cytochrome P450 89A2 OS=Arabidopsis thaliana GN=CYP89A2 PE=2 SV=2	unnamed protein product [Vitis vinifera]
comp19831_c0	--	--	--	--	Copia protein OS=Drosophila melanogaster GN=GIP PE=1 SV=3	integrase [Boechera divaricarpa]
comp10548_c0	[EH]	--	Biological Process: tryptophan biosynthetic process (GO:0000162);; Molecular Function: anthranilate synthase activity (GO:0004049);; Biological Process: response to wounding (GO:0009611);; Biological Process: response to bacterium (GO:0009617);; Biological Process: response to ethylene (GO:0009723);; Biological Process: auxin biosynthetic process (GO:0009851);;	K01657|0.0|vvi:100255399|hypothetical protein LOC100255399	Anthranilate synthase component I-2, chloroplastic OS=Arabidopsis thaliana GN=ASA2 PE=2 SV=1	anthranilate synthase alpha subunit [Ruta graveolens]
comp17477_c0	--	--	Molecular Function: kinase activity (GO:0016301);;	--	Probable LRR receptor-like serine/threonine-protein kinase At1g07650 OS=Arabidopsis thaliana GN=At1g07650 PE=1 SV=1	hypothetical protein PRUPE_ppa000854mg [Prunus persica]
comp30120_c0	--	--	Biological Process: DNA-dependent DNA replication (GO:0006261);;	--	--	PREDICTED: uncharacterized protein LOC100264643 [Vitis vinifera]
comp44101_c0	--	--	--	--	Transcriptional regulator SUPERMAN OS=Arabidopsis thaliana GN=SUP PE=1 SV=1	C2H2 and C2HC zinc fingers superfamily protein, putative [Theobroma cacao]
comp10361_c0	--	--	Biological Process: cellular metabolic process (GO:0044237);; Biological Process: single-organism cellular process (GO:0044763);; Biological Process: cellular component organization or biogenesis (GO:0071840);;	--	Nucleosome-remodeling factor subunit BPTF OS=Homo sapiens GN=BPTF PE=1 SV=3	PREDICTED: uncharacterized protein LOC100260139 [Vitis vinifera]
comp2380_c0	--	--	Biological Process: signal transduction (GO:0007165);; Cellular Component: plant-type cell wall (GO:0009505);; Molecular Function: phosphatidylinositol binding (GO:0035091);;	--	Switch-associated protein 70 OS=Gallus gallus GN=SWAP70 PE=2 SV=1	PREDICTED: uncharacterized protein LOC100254120 [Vitis vinifera]
comp17856_c0	--	--	--	--	Protein FAR1-RELATED SEQUENCE 5 OS=Arabidopsis thaliana GN=FRS5 PE=2 SV=1	PREDICTED: protein FAR1-RELATED SEQUENCE 5-like [Vitis vinifera]
comp10766_c0	--	--	--	--	--	T-box transcription factor TBX5, putative isoform 1 [Theobroma cacao]
comp2458_c0	[T]	Signal transduction mechanisms	Cellular Component: protein phosphatase type 1 complex (GO:0000164);; Molecular Function: protein serine/threonine phosphatase activity (GO:0004722);; Biological Process: protein dephosphorylation (GO:0006470);; Biological Process: N-terminal protein myristoylation (GO:0006499);; Molecular Function: metal ion binding (GO:0046872);;	--	Serine/threonine-protein phosphatase PP1 OS=Zea mays GN=PP1 PE=2 SV=1	predicted protein [Populus trichocarpa]
comp13950_c0	[O]	Posttranslational modification, protein turnover, chaperones	Molecular Function: glutathione transferase activity (GO:0004364);; Biological Process: auxin-activated signaling pathway (GO:0009734);;	K00799|3e-37|pop:POPTR_730647|hypothetical protein	Glutathione S-transferase OS=Hyoscyamus muticus PE=1 SV=1	RecName: Full=Glutathione S-transferase; AltName: Full=25 kDa auxin-binding protein; AltName: Full=GST class-phi
comp39449_c0	--	--	--	--	Miraculin OS=Synsepalum dulcificum PE=1 SV=3	Kunitz family trypsin and protease inhibitor protein, putative [Theobroma cacao]
comp20888_c0	--	--	--	--	--	GTL1 [Populus tremula x Populus alba]
comp3919_c0	[D]	Cell cycle control, cell division, chromosome partitioning	Biological Process: mitotic cell cycle (GO:0000278);; Biological Process: RNA processing (GO:0006396);; Cellular Component: plasmodesma (GO:0009506);;	--	FKBP12-interacting protein of 37 kDa OS=Arabidopsis thaliana GN=FIP37 PE=1 SV=1	PREDICTED: FKBP12-interacting protein of 37 kDa [Vitis vinifera]
comp13860_c0	--	--	Cellular Component: mitochondrion (GO:0005739);; Cellular Component: chloroplast inner membrane (GO:0009706);;	--	--	PREDICTED: uncharacterized protein LOC100255131 [Vitis vinifera]
comp24962_c0	--	--	--	--	--	uncharacterized protein LOC100277583 [Zea mays]
comp4626_c0	[O]	Posttranslational modification, protein turnover, chaperones	Molecular Function: ATP binding (GO:0005524);; Cellular Component: mitochondrion (GO:0005739);; Cellular Component: plasma membrane (GO:0005886);; Biological Process: protein folding (GO:0006457);; Biological Process: response to heat (GO:0009408);; Biological Process: response to water deprivation (GO:0009414);; Cellular Component: chloroplast stroma (GO:0009570);; Biological Process: response t…	--	Heat shock protein 90 OS=Theileria parva GN=TP02_0244 PE=2 SV=2	PREDICTED: endoplasmin homolog [Vitis vinifera]
comp33309_c0	--	--	Molecular Function: RNA binding (GO:0003723);; Molecular Function: RNA-directed DNA polymerase activity (GO:0003964);; Cellular Component: mitochondrion (GO:0005739);; Biological Process: RNA-dependent DNA replication (GO:0006278);; Biological Process: mRNA processing (GO:0006397);; Biological Process: RNA splicing (GO:0008380);; Cellular Component: chloroplast (GO:0009507);;	--	--	hypothetical protein ZEAMMB73_214519 [Zea mays]
comp7021_c0	[R]	General function prediction only	Cellular Component: nucleus (GO:0005634);;	--	Histone-lysine N-methyltransferase ATXR2 OS=Arabidopsis thaliana GN=ATXR2 PE=2 SV=1	PREDICTED: histone-lysine N-methyltransferase ATXR2-like [Cucumis sativus]
comp8476_c0	--	--	Molecular Function: DNA binding (GO:0003677);; Molecular Function: sequence-specific DNA binding transcription factor activity (GO:0003700);; Cellular Component: nucleus (GO:0005634);; Biological Process: regulation of transcription, DNA-templated (GO:0006355);; Biological Process: meristem maintenance (GO:0010073);; Biological Process: single-organism developmental process (GO:0044767);; Molecul…	--	MADS-box transcription factor 14 OS=Oryza sativa subsp. japonica GN=MADS14 PE=1 SV=2	K-box region and MADS-box transcription factor family protein isoform 2 [Theobroma cacao]
comp20796_c0	--	--	Molecular Function: copper ion binding (GO:0005507);; Cellular Component: plasma membrane (GO:0005886);; Cellular Component: cytoplasmic membrane-bounded vesicle (GO:0016023);; Cellular Component: anchored component of membrane (GO:0031225);;	--	Early nodulin-like protein 1 OS=Arabidopsis thaliana GN=At2g25060 PE=1 SV=2	unknown [Lotus japonicus]
comp32980_c0	--	--	Molecular Function: transferase activity, transferring phosphorus-containing groups (GO:0016772);;	--	--	hypothetical protein VITISV_031023 [Vitis vinifera]
comp15787_c0	[Z]	Cytoskeleton	Biological Process: microtubule cytoskeleton organization (GO:0000226);; Biological Process: cytokinesis by cell plate formation (GO:0000911);; Molecular Function: microtubule motor activity (GO:0003777);; Molecular Function: ATP binding (GO:0005524);; Cellular Component: cytoplasm (GO:0005737);; Cellular Component: kinesin complex (GO:0005871);; Cellular Component: microtubule (GO:0005874);; Bio…	--	Probable 125 kDa kinesin-related protein OS=Arabidopsis thaliana GN=At2g36200 PE=2 SV=2	Os08g0558400 [Oryza sativa Japonica Group]
comp8600_c0	--	--	--	--	OTU domain-containing protein At3g57810 OS=Arabidopsis thaliana GN=At3g57810 PE=2 SV=1	PREDICTED: OTU domain-containing protein At3g57810 [Vitis vinifera]
comp5489_c0	[O]	Posttranslational modification, protein turnover, chaperones	Biological Process: protein folding (GO:0006457);; Cellular Component: plastid (GO:0009536);; Molecular Function: heat shock protein binding (GO:0031072);;	--	Chaperone protein DnaJ OS=Hydrogenobacter thermophilus (strain DSM 6534 / IAM 12695 / TK-6) GN=dnaJ PE=3 SV=1	PREDICTED: uncharacterized protein LOC100250529 [Vitis vinifera]
comp8508_c0	[R]	General function prediction only	Molecular Function: catalytic activity (GO:0003824);; Cellular Component: cytoplasm (GO:0005737);; Biological Process: metabolic process (GO:0008152);;	--	Maspardin OS=Xenopus laevis GN=spg21 PE=2 SV=1	PREDICTED: maspardin [Vitis vinifera]
comp413_c0	[O]	Posttranslational modification, protein turnover, chaperones	Cellular Component: nucleus (GO:0005634);; Cellular Component: cytoplasm (GO:0005737);; Cellular Component: plasma membrane (GO:0005886);; Biological Process: ubiquitin-dependent protein catabolic process (GO:0006511);; Molecular Function: acid-amino acid ligase activity (GO:0016881);;	K06689|1e-102|sbi:SORBI_02g019480|hypothetical protein	Ubiquitin-conjugating enzyme E2-17 kDa OS=Solanum lycopersicum PE=2 SV=1	unknown [Picea sitchensis]
comp43818_c0	--	--	Cellular Component: mitochondrion (GO:0005739);; Cellular Component: plastid (GO:0009536);;	--	Translation initiation factor IF-2 OS=Rhodococcus erythropolis (strain PR4 / NBRC 100887) GN=infB PE=3 SV=1	conserved hypothetical protein [Ricinus communis]
comp40236_c0	[I]	Lipid transport and metabolism	Molecular Function: phospholipase D activity (GO:0004630);; Molecular Function: calcium ion binding (GO:0005509);; Cellular Component: plasma membrane (GO:0005886);; Biological Process: response to osmotic stress (GO:0006970);; Biological Process: cellular response to nitrogen starvation (GO:0006995);; Biological Process: phospholipid catabolic process (GO:0009395);; Biological Process: post-embr…	--	Phospholipase D alpha 1 OS=Zea mays GN=PLD1 PE=2 SV=1	hypothetical protein SORBIDRAFT_02g024910 [Sorghum bicolor]
comp11315_c0	[QR]	--	Molecular Function: RNA binding (GO:0003723);; Molecular Function: mRNA (guanine-N7-)-methyltransferase activity (GO:0004482);; Cellular Component: nucleus (GO:0005634);; Biological Process: 7-methylguanosine mRNA capping (GO:0006370);; Biological Process: proline transport (GO:0015824);; Biological Process: RNA (guanine-N7)-methylation (GO:0036265);;	K00565|8e-64|vvi:100243615|hypothetical protein LOC100243615	mRNA cap guanine-N7 methyltransferase 1 OS=Arabidopsis thaliana GN=At3g20650 PE=2 SV=1	PREDICTED: mRNA cap guanine-N7 methyltransferase 1 [Vitis vinifera]
comp11795_c0	--	--	Molecular Function: DNA binding (GO:0003677);; Molecular Function: protein binding (GO:0005515);; Cellular Component: nucleus (GO:0005634);; Biological Process: DNA-dependent DNA replication (GO:0006261);; Biological Process: regulation of DNA replication (GO:0006275);; Biological Process: regulation of transcription, DNA-templated (GO:0006355);; Molecular Function: zinc ion binding (GO:0008270);…	--	Histone-lysine N-methyltransferase ATXR5 OS=Arabidopsis thaliana GN=ATXR5 PE=2 SV=1	PREDICTED: histone-lysine N-methyltransferase ATXR5 [Vitis vinifera]
comp12383_c0	--	--	Cellular Component: plasma membrane (GO:0005886);;	--	Uncharacterized protein At5g65660 OS=Arabidopsis thaliana GN=At5g65660 PE=1 SV=1	PREDICTED: uncharacterized protein At5g65660-like [Solanum lycopersicum]
comp45748_c0	--	--	--	--	Period circadian protein homolog 1 OS=Mus musculus GN=Per1 PE=1 SV=2	PREDICTED: uncharacterized protein LOC100835544 [Brachypodium distachyon]
comp5787_c0	--	--	Cellular Component: nucleus (GO:0005634);; Biological Process: iron ion transport (GO:0006826);; Biological Process: cytokinin biosynthetic process (GO:0009691);; Biological Process: cellular response to iron ion starvation (GO:0010106);; Biological Process: response to nitrate (GO:0010167);; Biological Process: nitrate transport (GO:0015706);;	--	F-box/kelch-repeat protein At3g27150 OS=Arabidopsis thaliana GN=At3g27150 PE=2 SV=1	PREDICTED: F-box/kelch-repeat protein At3g27150-like [Vitis vinifera]
comp4040_c0	[OC]	--	Cellular Component: cytoplasm (GO:0005737);; Biological Process: protein folding (GO:0006457);; Biological Process: heat acclimation (GO:0010286);; Molecular Function: oxidoreductase activity, acting on a sulfur group of donors, disulfide as acceptor (GO:0016671);; Molecular Function: Hsp70 protein binding (GO:0030544);; Biological Process: cell redox homeostasis (GO:0045454);; Biological Process…	--	TPR repeat-containing thioredoxin TDX OS=Arabidopsis thaliana GN=TDX PE=1 SV=1	PREDICTED: TPR repeat-containing thioredoxin TDX-like isoform 1 [Solanum lycopersicum]
comp32640_c0	--	--	Molecular Function: metal ion binding (GO:0046872);;	--	RING-H2 finger protein ATL65 OS=Arabidopsis thaliana GN=ATL65 PE=2 SV=2	PREDICTED: RING-H2 finger protein ATL65-like [Glycine max]
comp14572_c0	--	--	Molecular Function: oxidoreductase activity (GO:0016491);;	--	Tetrahydrocannabinolic acid synthase OS=Cannabis sativa PE=1 SV=1	hypothetical protein PRUPE_ppa026518mg [Prunus persica]
comp12456_c0	--	--	Molecular Function: binding (GO:0005488);;	--	Zinc finger CCCH domain-containing protein 62 OS=Oryza sativa subsp. japonica GN=Os10g0391300 PE=2 SV=2	predicted protein [Populus trichocarpa]
comp4958_c1	[A]	RNA processing and modification	Biological Process: mRNA splicing, via spliceosome (GO:0000398);; Molecular Function: nucleic acid binding (GO:0003676);;	K13095|0.0|vvi:100267539|hypothetical protein LOC100267539	Branchpoint-bridging protein OS=Neosartorya fumigata (strain ATCC MYA-4609 / Af293 / CBS 101355 / FGSC A1100) GN=bbp PE=3 SV=1	PREDICTED: uncharacterized protein LOC100267539 [Vitis vinifera]
comp16959_c0	--	--	Molecular Function: glucuronyl-galactosyl-proteoglycan 4-alpha-N-acetylglucosaminyltransferase activity (GO:0001888);; Cellular Component: mitochondrion (GO:0005739);; Cellular Component: endosome (GO:0005768);; Cellular Component: Golgi apparatus (GO:0005794);; Cellular Component: trans-Golgi network (GO:0005802);; Biological Process: response to bacterium (GO:0009617);; Biological Process: phlo…	K02367|1e-147|vvi:100260303|hypothetical protein LOC100260303	Exostosin-2 OS=Drosophila melanogaster GN=Ext2 PE=1 SV=1	PREDICTED: exostosin-2 [Vitis vinifera]
comp20498_c0	--	--	Cellular Component: plasmodesma (GO:0009506);;	--	Vegetative cell wall protein gp1 OS=Chlamydomonas reinhardtii GN=GP1 PE=2 SV=1	hypothetical protein PRUPE_ppa002891mg [Prunus persica]
comp23297_c0	--	--	--	--	--	hypothetical protein VITISV_016120 [Vitis vinifera]
comp19703_c0	--	--	Cellular Component: Golgi apparatus (GO:0005794);; Biological Process: carbohydrate biosynthetic process (GO:0016051);; Molecular Function: polygalacturonate 4-alpha-galacturonosyltransferase activity (GO:0047262);;	--	Probable galacturonosyltransferase-like 7 OS=Arabidopsis thaliana GN=GATL7 PE=2 SV=1	glycosyltransferase, CAZy family GT8 [Populus trichocarpa]
comp26104_c0	[G]	Carbohydrate transport and metabolism	Molecular Function: glucan exo-1,3-beta-glucosidase activity (GO:0004338);; Molecular Function: beta-galactosidase activity (GO:0004565);; Cellular Component: cell wall (GO:0005618);; Biological Process: metabolic process (GO:0008152);; Cellular Component: cytoplasmic membrane-bounded vesicle (GO:0016023);; Molecular Function: beta-D-fucosidase activity (GO:0033907);; Molecular Function: beta-L-a…	--	Beta-glucosidase 12 OS=Oryza sativa subsp. japonica GN=BGLU12 PE=2 SV=2	unnamed protein product [Oryza sativa Japonica Group]
comp24548_c0	--	--	Biological Process: tissue development (GO:0009888);; Biological Process: cellular macromolecule metabolic process (GO:0044260);; Biological Process: single-organism developmental process (GO:0044767);; Biological Process: system development (GO:0048731);; Biological Process: regulation of cellular process (GO:0050794);; Biological Process: cell wall organization or biogenesis (GO:0071554);;	--	NAC domain-containing protein 7 OS=Arabidopsis thaliana GN=NAC007 PE=2 SV=2	PREDICTED: NAC domain-containing protein 7-like [Cucumis sativus]
comp37478_c0	--	--	--	--	--	Polycomb group protein EMBRYONIC FLOWER 2 [Triticum urartu]
comp8199_c0	[U]	Intracellular trafficking, secretion, and vesicular transport	Cellular Component: cytosol (GO:0005829);; Biological Process: intracellular protein transport (GO:0006886);; Biological Process: nucleocytoplasmic transport (GO:0006913);; Molecular Function: Ran GTPase binding (GO:0008536);; Molecular Function: protein transporter activity (GO:0008565);;	K14293|0.0|vvi:100241948|hypothetical protein LOC100241948	Importin subunit beta-1 OS=Mus musculus GN=Kpnb1 PE=1 SV=2	Importin beta-1, putative isoform 1 [Theobroma cacao]
comp1563_c0	--	--	Molecular Function: nucleic acid binding (GO:0003676);; Biological Process: cellular process (GO:0009987);; Cellular Component: intracellular part (GO:0044424);;	--	La-related protein 7 OS=Mus musculus GN=Larp7 PE=1 SV=2	PREDICTED: la-related protein 6-like [Vitis vinifera]
comp3232_c0	[D]	Cell cycle control, cell division, chromosome partitioning	Cellular Component: nucleus (GO:0005634);; Biological Process: tubulin complex assembly (GO:0007021);; Cellular Component: phragmoplast (GO:0009524);; Biological Process: embryo development (GO:0009790);; Biological Process: cell division (GO:0051301);;	--	Tubulin-specific chaperone B OS=Dictyostelium discoideum GN=tbcb PE=3 SV=1	tubulin-specific chaperone B, putative [Ricinus communis]
comp6978_c0	--	--	Molecular Function: ligase activity (GO:0016874);;	--	--	PREDICTED: mitochondrial ubiquitin ligase activator of nfkb 1 [Vitis vinifera]
comp27602_c0	--	--	--	--	--	HAT dimerization domain-containing protein isoform 6 [Theobroma cacao]
comp327_c0	--	--	Biological Process: response to salt stress (GO:0009651);;	K01527|6e-88|vvi:100242819|hypothetical protein LOC100242819	Transcription factor BTF3 homolog 4 OS=Danio rerio GN=btf3l4 PE=2 SV=1	PREDICTED: transcription factor BTF3 [Vitis vinifera]
comp1495_c1	--	--	Cellular Component: Golgi apparatus (GO:0005794);; Biological Process: ER to Golgi vesicle-mediated transport (GO:0006888);; Biological Process: cellulose biosynthetic process (GO:0030244);;	--	Trafficking protein particle complex subunit 3 OS=Gallus gallus GN=TRAPPC3 PE=2 SV=1	PREDICTED: trafficking protein particle complex subunit 3 [Vitis vinifera]
comp22293_c0	--	--	--	--	Putative ribonuclease H protein At1g65750 OS=Arabidopsis thaliana GN=At1g65750 PE=3 SV=1	hypothetical protein VITISV_035196 [Vitis vinifera]
comp28631_c0	--	--	Molecular Function: RNA binding (GO:0003723);; Molecular Function: RNA-directed DNA polymerase activity (GO:0003964);; Molecular Function: aspartic-type endopeptidase activity (GO:0004190);; Biological Process: RNA-dependent DNA replication (GO:0006278);; Biological Process: proteolysis (GO:0006508);; Molecular Function: zinc ion binding (GO:0008270);; Biological Process: DNA integration (GO:0015…	--	--	PREDICTED: uncharacterized protein LOC101507298 [Cicer arietinum]
comp13430_c0	--	--	--	--	ABC transporter G family member 5 OS=Arabidopsis thaliana GN=ABCG5 PE=2 SV=1	PREDICTED: ABC transporter G family member 5-like [Cicer arietinum]
comp24226_c0	--	--	--	--	Putative protein TPRXL OS=Homo sapiens GN=TPRXL PE=5 SV=2	PREDICTED: presqualene diphosphate phosphatase [Vitis vinifera]
comp14019_c0	--	--	Molecular Function: catalytic activity (GO:0003824);; Biological Process: signal transduction (GO:0007165);;	--	--	PREDICTED: receptor-like protein kinase BRI1-like 3-like [Fragaria vesca subsp. vesca]
comp7416_c0	--	--	Cellular Component: plasma membrane (GO:0005886);; Cellular Component: cytoplasmic membrane-bounded vesicle (GO:0016023);; Cellular Component: anchored component of membrane (GO:0031225);;	--	Uncharacterized GPI-anchored protein At1g61900 OS=Arabidopsis thaliana GN=At1g61900 PE=1 SV=1	unnamed protein product [Vitis vinifera]
comp24970_c0	--	--	Molecular Function: catalytic activity (GO:0003824);;	--	Verprolin OS=Schizosaccharomyces pombe (strain 972 / ATCC 24843) GN=vrp1 PE=1 SV=1	hypothetical protein WALSEDRAFT_56819 [Wallemia sebi CBS 633.66]
comp18018_c0	--	--	Molecular Function: binding (GO:0005488);; Biological Process: transcription, DNA-templated (GO:0006351);;	K09264|1e-76|zma:541799|si1	MADS-box transcription factor 16 OS=Oryza sativa subsp. japonica GN=MADS16 PE=1 SV=2	MADS-box2 transcription factor [Guzmania wittmackii x Guzmania lingulata]
comp16951_c0	--	--	--	--	--	unnamed protein product [Vitis vinifera]
comp32154_c0	--	--	--	K11449|5e-86|vvi:100244450|hypothetical protein LOC100244450	--	PREDICTED: uncharacterized protein LOC100244450 [Vitis vinifera]
comp38333_c0	--	--	Biological Process: chloroplast RNA processing (GO:0031425);; Cellular Component: intracellular membrane-bounded organelle (GO:0043231);; Cellular Component: cytoplasmic part (GO:0044444);;	--	Pentatricopeptide repeat-containing protein At5g61800 OS=Arabidopsis thaliana GN=PCMP-E8 PE=2 SV=1	PREDICTED: pentatricopeptide repeat-containing protein At5g61800-like [Fragaria vesca subsp. vesca]
comp1568_c0	--	--	--	--	--	hypothetical protein VOLCADRAFT_119669 [Volvox carteri f. nagariensis]
comp4833_c0	--	--	Molecular Function: organic cyclic compound binding (GO:0097159);; Molecular Function: heterocyclic compound binding (GO:1901363);;	--	Zinc finger CCCH domain-containing protein 18 OS=Arabidopsis thaliana GN=At2g05160 PE=2 SV=1	RNA binding protein, putative [Ricinus communis]
comp18656_c0	--	--	--	K14325|5e-06|pop:POPTR_823076|hypothetical protein	--	--
comp39598_c0	--	--	--	--	Cuticle collagen 1 OS=Caenorhabditis elegans GN=sqt-3 PE=3 SV=2	conserved hypothetical protein [Ajellomyces capsulatus H88]
comp20395_c0	--	--	Cellular Component: chloroplast (GO:0009507);; Biological Process: chloroplast RNA processing (GO:0031425);;	--	Pentatricopeptide repeat-containing protein At2g29760, chloroplastic OS=Arabidopsis thaliana GN=PCMP-H33 PE=2 SV=1	PREDICTED: pentatricopeptide repeat-containing protein At2g29760, chloroplastic-like [Vitis vinifera]
comp587_c0	--	--	--	--	--	PREDICTED: uncharacterized protein LOC101203720 [Cucumis sativus]
comp19330_c0	[E]	Amino acid transport and metabolism	Biological Process: cellular amino acid metabolic process (GO:0006520);; Molecular Function: transaminase activity (GO:0008483);; Biological Process: biosynthetic process (GO:0009058);; Molecular Function: pyridoxal phosphate binding (GO:0030170);;	--	Nicotianamine aminotransferase A OS=Hordeum vulgare GN=naat-A PE=1 SV=2	hypothetical protein OsI_21629 [Oryza sativa Indica Group]
comp306_c1	[J]	Translation, ribosomal structure and biogenesis	Molecular Function: RNA 7-methylguanosine cap binding (GO:0000340);; Molecular Function: translation initiation factor activity (GO:0003743);; Cellular Component: nucleus (GO:0005634);; Cellular Component: cytosol (GO:0005829);; Biological Process: translational initiation (GO:0006413);; Biological Process: regulation of translation (GO:0006417);; Biological Process: negative regulation of defens…	K03259|2e-41|vvi:100259631|hypothetical protein LOC100259631	Eukaryotic translation initiation factor isoform 4E-2 OS=Oryza sativa subsp. japonica GN=Os10g0467600 PE=2 SV=2	unnamed protein product [Vitis vinifera]
comp4721_c0	--	--	Molecular Function: protein binding (GO:0005515);; Biological Process: chromatin silencing (GO:0006342);; Biological Process: microtubule nucleation (GO:0007020);; Biological Process: pollen tube growth (GO:0009860);; Biological Process: leaf morphogenesis (GO:0009965);; Biological Process: trichome morphogenesis (GO:0010090);; Biological Process: histone phosphorylation (GO:0016572);; Cellular C…	--	Protein PIR OS=Arabidopsis thaliana GN=PIR PE=1 SV=2	PREDICTED: protein PIR-like isoform X1 [Setaria italica]
comp2211_c0	--	--	Cellular Component: mitochondrion (GO:0005739);; Molecular Function: transferase activity, transferring phosphorus-containing groups (GO:0016772);;	--	Pentatricopeptide repeat-containing protein At1g11290 OS=Arabidopsis thaliana GN=PCMP-H40 PE=2 SV=1	PREDICTED: pentatricopeptide repeat-containing protein At4g13650-like [Vitis vinifera]
comp14911_c0	--	--	--	--	--	PREDICTED: microtubule-associated protein TORTIFOLIA1-like [Cucumis sativus]
comp19460_c0	[L]	Replication, recombination and repair	Molecular Function: DNA binding (GO:0003677);; Molecular Function: DNA-directed DNA polymerase activity (GO:0003887);; Cellular Component: nucleus (GO:0005634);; Biological Process: DNA-dependent DNA replication (GO:0006261);; Biological Process: DNA methylation (GO:0006306);; Biological Process: methylation-dependent chromatin silencing (GO:0006346);; Biological Process: microtubule nucleation (…	K02328|0.0|vvi:100241865|hypothetical protein LOC100241865	DNA polymerase delta small subunit OS=Arabidopsis thaliana GN=POLD2 PE=2 SV=2	PREDICTED: DNA polymerase delta small subunit [Vitis vinifera]
comp4127_c0	[D]	Cell cycle control, cell division, chromosome partitioning	Cellular Component: membrane (GO:0016020);;	--	Proline-rich receptor-like protein kinase PERK8 OS=Arabidopsis thaliana GN=PERK8 PE=1 SV=1	hypothetical protein VITISV_028996 [Vitis vinifera]
comp4491_c0	--	--	Molecular Function: GTPase activity (GO:0003924);; Molecular Function: signal transducer activity (GO:0004871);; Molecular Function: GTP binding (GO:0005525);; Cellular Component: nucleus (GO:0005634);; Biological Process: GTP catabolic process (GO:0006184);; Biological Process: G-protein coupled receptor signaling pathway (GO:0007186);; Biological Process: gravitropism (GO:0009630);; Biological …	--	Guanine nucleotide-binding protein alpha-2 subunit OS=Glycine max GN=GPA2 PE=2 SV=1	hypothetical protein PRUPE_ppa001297mg [Prunus persica]
comp12869_c0	--	--	Molecular Function: catalytic activity (GO:0003824);; Molecular Function: organic cyclic compound binding (GO:0097159);; Molecular Function: heterocyclic compound binding (GO:1901363);;	--	Craniofacial development protein 2 OS=Tragulus javanicus GN=CFDP2 PE=2 SV=1	T4.15 [Malus x robusta]
comp20259_c0	[S]	Function unknown	Molecular Function: calmodulin-dependent protein kinase activity (GO:0004683);; Molecular Function: protein tyrosine kinase activity (GO:0004713);; Molecular Function: ATP binding (GO:0005524);; Cellular Component: plasma membrane (GO:0005886);; Biological Process: protein phosphorylation (GO:0006468);;	--	Wall-associated receptor kinase-like 14 OS=Arabidopsis thaliana GN=WAKL14 PE=2 SV=2	Kinase, putative [Theobroma cacao]
comp19255_c0	--	--	--	--	--	hypothetical protein VITISV_022081 [Vitis vinifera]
comp20365_c0	--	--	Molecular Function: oxidoreductase activity, acting on paired donors, with incorporation or reduction of molecular oxygen, 2-oxoglutarate as one donor, and incorporation of one atom each of oxygen into both donors (GO:0016706);;	--	1-aminocyclopropane-1-carboxylate oxidase homolog 1 OS=Arabidopsis thaliana GN=At1g06620 PE=2 SV=1	1-aminocyclopropane-1-carboxylate oxidase-like protein [Medicago truncatula]
comp9213_c0	--	--	--	--	--	hypothetical protein PRUPE_ppa009880mg [Prunus persica]
comp5122_c0	--	--	Molecular Function: ATP binding (GO:0005524);;	--	Putative disease resistance protein At3g14460 OS=Arabidopsis thaliana GN=At3g14460 PE=3 SV=1	cc-nbs-lrr resistance protein [Populus trichocarpa]
comp15590_c0	--	--	--	--	Cyclic dof factor 2 OS=Arabidopsis thaliana GN=CDF2 PE=1 SV=2	PREDICTED: dof zinc finger protein DOF5.2-like [Vitis vinifera]
comp18544_c0	--	--	--	--	Vegetative cell wall protein gp1 OS=Chlamydomonas reinhardtii GN=GP1 PE=2 SV=1	PREDICTED: uncharacterized protein LOC100257171 [Vitis vinifera]
comp13611_c0	--	--	--	--	Transcription factor bHLH130 OS=Arabidopsis thaliana GN=BHLH130 PE=1 SV=1	PREDICTED: transcription factor bHLH130-like [Vitis vinifera]
comp15185_c0	[L]	Replication, recombination and repair	Molecular Function: nucleic acid binding (GO:0003676);; Cellular Component: cytoplasm (GO:0005737);; Biological Process: tRNA modification (GO:0006400);; Biological Process: protein targeting to mitochondrion (GO:0006626);; Molecular Function: methyltransferase activity (GO:0008168);; Biological Process: methylation (GO:0032259);; Biological Process: 2-methylguanosine metabolic process (GO:008018…	--	tRNA (guanine(10)-N2)-methyltransferase homolog OS=Pongo abelii GN=TRMT11 PE=2 SV=1	hypothetical protein VITISV_002923 [Vitis vinifera]
comp33884_c0	--	--	Molecular Function: nucleic acid binding (GO:0003676);; Molecular Function: catalytic activity (GO:0003824);; Biological Process: cellular process (GO:0009987);;	--	--	hypothetical protein [Beta vulgaris subsp. vulgaris]
comp17903_c0	[RTKL]	--	Molecular Function: nucleotide binding (GO:0000166);; Molecular Function: protein serine/threonine kinase activity (GO:0004674);; Biological Process: phosphorylation (GO:0016310);;	--	L-type lectin-domain containing receptor kinase V.9 OS=Arabidopsis thaliana GN=LECRK59 PE=2 SV=1	Receptor lectin kinase [Theobroma cacao]
comp13969_c0	--	--	--	--	--	PREDICTED: repressor of RNA polymerase III transcription MAF1 homolog [Vitis vinifera]
comp17217_c0	--	--	Biological Process: mitotic cell cycle (GO:0000278);; Biological Process: RNA processing (GO:0006396);; Biological Process: organ morphogenesis (GO:0009887);; Biological Process: regulation of root meristem growth (GO:0010082);; Biological Process: glucuronoxylan metabolic process (GO:0010413);; Biological Process: positive regulation of organelle organization (GO:0010638);; Biological Process: r…	--	Putative vacuolar protein sorting-associated protein 13A OS=Dictyostelium discoideum GN=vps13A PE=2 SV=1	PREDICTED: uncharacterized protein LOC100822443 [Brachypodium distachyon]
comp14912_c0	--	--	Cellular Component: vacuole (GO:0005773);; Biological Process: transport (GO:0006810);; Cellular Component: membrane (GO:0016020);; Cellular Component: intracellular organelle part (GO:0044446);; Biological Process: single-organism process (GO:0044699);;	K01507|1e-11|sbi:SORBI_10g009880|hypothetical protein	Pyrophosphate-energized vacuolar membrane proton pump OS=Vigna radiata var. radiata PE=1 SV=3	vaculor H+-pyrophosphatase [Sorghum bicolor]
comp5973_c1	[K]	Transcription	Biological Process: RNA splicing, via endonucleolytic cleavage and ligation (GO:0000394);; Molecular Function: DNA binding (GO:0003677);; Molecular Function: sequence-specific DNA binding transcription factor activity (GO:0003700);; Cellular Component: nucleus (GO:0005634);; Cellular Component: cytosol (GO:0005829);; Biological Process: sister chromatid cohesion (GO:0007062);; Biological Process:…	K03145|1e-136|vvi:100263760|hypothetical protein LOC100263760	Transcription elongation factor A protein 3 OS=Mus musculus GN=Tcea3 PE=1 SV=3	Transcript elongation factor IIS, putative [Theobroma cacao]
comp1961_c0	[C]	Energy production and conversion	Cellular Component: mitochondrial respiratory chain complex I (GO:0005747);; Biological Process: ubiquitin-dependent protein catabolic process (GO:0006511);; Biological Process: response to oxidative stress (GO:0006979);; Molecular Function: NADH dehydrogenase (ubiquinone) activity (GO:0008137);; Molecular Function: electron carrier activity (GO:0009055);; Cellular Component: chloroplast (GO:0009…	K03934|0.0|vvi:100246750|hypothetical protein LOC100246750	NADH dehydrogenase [ubiquinone] iron-sulfur protein 1, mitochondrial OS=Solanum tuberosum PE=1 SV=1	PREDICTED: NADH dehydrogenase [ubiquinone] iron-sulfur protein 1, mitochondrial [Vitis vinifera]
comp7672_c0	[I]	Lipid transport and metabolism	Molecular Function: acetyl-CoA carboxylase activity (GO:0003989);; Biological Process: fatty acid biosynthetic process (GO:0006633);; Cellular Component: acetyl-CoA carboxylase complex (GO:0009317);; Molecular Function: biotin binding (GO:0009374);; Cellular Component: chloroplast stroma (GO:0009570);; Cellular Component: chloroplast envelope (GO:0009941);;	K02160|1e-27|ppp:PHYPADRAFT_115965|hypothetical protein	Biotin carboxyl carrier protein of acetyl-CoA carboxylase 1, chloroplastic OS=Arabidopsis thaliana GN=BCCP1 PE=1 SV=2	unnamed protein product [Vitis vinifera]
comp6250_c0	[MG]	--	Molecular Function: binding (GO:0005488);; Biological Process: metabolic process (GO:0008152);; Molecular Function: oxidoreductase activity (GO:0016491);;	K08695|1e-132|vvi:100232981|ANR, ban	Anthocyanidin reductase OS=Arabidopsis thaliana GN=BAN PE=1 SV=2	anthocyanidin reductase [Malus domestica]
comp5164_c0	--	--	Cellular Component: nucleus (GO:0005634);;	K13174|0.0|vvi:100242063|hypothetical protein LOC100242063	THO complex subunit 5 homolog OS=Homo sapiens GN=THOC5 PE=1 SV=2	PREDICTED: THO complex subunit 5 homolog [Vitis vinifera]
comp7192_c0	--	--	Molecular Function: binding (GO:0005488);;	--	Serine/arginine repetitive matrix protein 2 OS=Homo sapiens GN=SRRM2 PE=1 SV=2	PREDICTED: uncharacterized protein LOC100794175 [Glycine max]
comp4172_c0	--	--	Biological Process: iron ion transport (GO:0006826);; Biological Process: aging (GO:0007568);; Biological Process: cellular response to iron ion starvation (GO:0010106);; Biological Process: response to nitrate (GO:0010167);; Biological Process: regulation of anion channel activity (GO:0010359);; Biological Process: nitrate transport (GO:0015706);; Molecular Function: transferase activity (GO:001…	--	Rhodanese-like domain-containing protein 17 OS=Arabidopsis thaliana GN=STR17 PE=2 SV=1	PREDICTED: thiosulfate sulfurtransferase 18-like [Solanum lycopersicum]
comp6350_c0	[OC]	--	Biological Process: nuclear division (GO:0000280);; Biological Process: cytokinesis by cell plate formation (GO:0000911);; Molecular Function: ATP binding (GO:0005524);; Cellular Component: nucleus (GO:0005634);; Cellular Component: cytoplasm (GO:0005737);; Biological Process: nucleolus organization (GO:0007000);; Biological Process: cortical microtubule organization (GO:0043622);; Biological Pro…	--	Thioredoxin domain-containing protein 9 homolog OS=Arabidopsis thaliana GN=At2g18990 PE=2 SV=1	hypothetical protein OsJ_34409 [Oryza sativa Japonica Group]
comp5240_c0	[Q]	Secondary metabolites biosynthesis, transport and catabolism	Molecular Function: monooxygenase activity (GO:0004497);; Biological Process: oxidation-reduction process (GO:0055114);;	--	Cytochrome P450 86B1 OS=Arabidopsis thaliana GN=CYP86B1 PE=2 SV=1	PREDICTED: cytochrome P450 86B1 [Vitis vinifera]
comp23641_c0	--	--	--	--	--	hypothetical protein [Zea mays]
comp1495_c0	[R]	General function prediction only	Molecular Function: nucleotide binding (GO:0000166);; Biological Process: nuclear-transcribed mRNA poly(A) tail shortening (GO:0000289);; Cellular Component: nucleus (GO:0005634);; Cellular Component: cytosol (GO:0005829);; Biological Process: translational initiation (GO:0006413);; Molecular Function: poly(A) binding (GO:0008143);;	--	Polyadenylate-binding protein 2 OS=Arabidopsis thaliana GN=PAB2 PE=1 SV=1	unnamed protein product [Vitis vinifera]
comp3658_c0	--	--	Molecular Function: signal recognition particle binding (GO:0005047);; Cellular Component: nucleus (GO:0005634);; Cellular Component: signal recognition particle, endoplasmic reticulum targeting (GO:0005786);; Cellular Component: cytosol (GO:0005829);; Biological Process: SRP-dependent cotranslational protein targeting to membrane (GO:0006614);; Molecular Function: 7S RNA binding (GO:0008312);; M…	K03107|0.0|pop:POPTR_835242|hypothetical protein	Signal recognition particle subunit SRP68 OS=Mus musculus GN=Srp68 PE=2 SV=2	hypothetical protein PRUPE_ppa002649mg [Prunus persica]
comp5248_c0	[JO]	--	Molecular Function: DNA binding (GO:0003677);; Molecular Function: chromatin binding (GO:0003682);; Cellular Component: nucleus (GO:0005634);;	K09522|0.0|rcu:RCOM_0519910|Zuotin, putative	DnaJ homolog subfamily C member 2 OS=Danio rerio GN=dnajc2 PE=2 SV=1	gonidia forming protein GlsA [Alstroemeria aurea]
comp34079_c0	--	--	--	--	--	hypothetical protein VITISV_015746 [Vitis vinifera]
comp3398_c1	[R]	General function prediction only	Molecular Function: protein serine/threonine phosphatase activity (GO:0004722);; Molecular Function: metal ion binding (GO:0046872);; Molecular Function: ADP-ribose diphosphatase activity (GO:0047631);; Molecular Function: CDP-glycerol diphosphatase activity (GO:0047734);;	--	Manganese-dependent ADP-ribose/CDP-alcohol diphosphatase OS=Oryza sativa subsp. japonica GN=Os07g0688000 PE=2 SV=1	PREDICTED: manganese-dependent ADP-ribose/CDP-alcohol diphosphatase-like [Fragaria vesca subsp. vesca]
comp6317_c0	[R]	General function prediction only	Molecular Function: protein binding (GO:0005515);; Molecular Function: GTP binding (GO:0005525);; Cellular Component: early endosome (GO:0005769);; Cellular Component: endoplasmic reticulum (GO:0005783);; Cellular Component: plasma membrane (GO:0005886);; Biological Process: small GTPase mediated signal transduction (GO:0007264);; Biological Process: response to chitin (GO:0010200);; Biological P…	--	Ras-related protein RABF2b OS=Arabidopsis thaliana GN=RABF2B PE=1 SV=1	RAB isoform 1 [Theobroma cacao]
comp27242_c0	[J]	Translation, ribosomal structure and biogenesis	--	--	Translation initiation factor IF-2 OS=Rhodococcus opacus (strain B4) GN=infB PE=3 SV=1	uncharacterized protein LOC100277681 [Zea mays]
comp200_c0	[J]	Translation, ribosomal structure and biogenesis	Molecular Function: scavenger receptor activity (GO:0005044);; Cellular Component: nucleus (GO:0005634);; Cellular Component: cytosol (GO:0005829);; Biological Process: blue light signaling pathway (GO:0009785);; Molecular Function: blue light photoreceptor activity (GO:0009882);; Biological Process: flower development (GO:0009908);; Biological Process: response to red light (GO:0010114);; Biolog…	K12115|0.0|pop:POPTR_809263|hypothetical protein	Adagio-like protein 1 OS=Oryza sativa subsp. japonica GN=Os06g0694000 PE=2 SV=1	Galactose oxidase/kelch repeat superfamily protein [Theobroma cacao]
comp2601_c0	[E]	Amino acid transport and metabolism	Biological Process: tryptophan biosynthetic process (GO:0000162);; Molecular Function: tryptophan synthase activity (GO:0004834);; Biological Process: response to oxidative stress (GO:0006979);; Cellular Component: chloroplast stroma (GO:0009570);; Biological Process: response to salt stress (GO:0009651);; Cellular Component: chloroplast envelope (GO:0009941);; Molecular Function: pyridoxal phosp…	K01696|0.0|vvi:100264166|hypothetical protein LOC100264166	Tryptophan synthase beta chain 2, chloroplastic OS=Camptotheca acuminata GN=TSB PE=2 SV=1	PREDICTED: tryptophan synthase beta chain 2, chloroplastic-like [Solanum lycopersicum]
comp24621_c0	--	--	--	--	--	hypothetical protein VITISV_022223 [Vitis vinifera]
comp1520_c0	--	--	--	--	UPF0481 protein At3g47200 OS=Arabidopsis thaliana GN=At3g47200 PE=1 SV=1	predicted protein [Populus trichocarpa]
comp34010_c0	--	--	Molecular Function: DNA binding (GO:0003677);; Biological Process: DNA recombination (GO:0006310);; Cellular Component: cytoplasmic membrane-bounded vesicle (GO:0016023);; Molecular Function: metal ion binding (GO:0046872);;	--	Retrovirus-related Pol polyprotein from transposon TNT 1-94 OS=Nicotiana tabacum PE=2 SV=1	retrotransposon protein, putative, Ty1-copia subclass [Oryza sativa Japonica Group]
comp27042_c0	--	--	--	--	--	hypothetical protein VITISV_006820 [Vitis vinifera]
comp12693_c0	--	--	Cellular Component: plastid (GO:0009536);;	--	--	PREDICTED: 2-hydroxy-6-oxononadienedioate/2-hydroxy-6-oxononatrienedioate hydrolase 2-like [Fragaria vesca subsp. vesca]
comp24974_c0	[C]	Energy production and conversion	Cellular Component: nucleus (GO:0005634);; Cellular Component: mitochondrion (GO:0005739);; Cellular Component: chloroplast (GO:0009507);; Molecular Function: oxidoreductase activity, acting on NAD(P)H, nitrogenous group as acceptor (GO:0016657);; Biological Process: oxidation-reduction process (GO:0055114);;	--	Classical arabinogalactan protein 9 OS=Arabidopsis thaliana GN=AGP9 PE=1 SV=2	PREDICTED: uncharacterized protein LOC100791269 [Glycine max]
comp22650_c0	[R]	General function prediction only	Cellular Component: nucleus (GO:0005634);; Cellular Component: vacuole (GO:0005773);; Cellular Component: endoplasmic reticulum (GO:0005783);; Cellular Component: plasma membrane (GO:0005886);; Biological Process: proteolysis (GO:0006508);; Molecular Function: serine-type peptidase activity (GO:0008236);; Biological Process: response to water (GO:0009415);; Biological Process: phototropism (GO:00…	K06889|4e-77|rcu:RCOM_1046060|Protein bem46, putative	Protein bem46 OS=Schizosaccharomyces pombe (strain 972 / ATCC 24843) GN=bem46 PE=2 SV=3	Protein bem46, putative [Ricinus communis]
comp41687_c0	--	--	--	--	Uncharacterized protein At3g17950 OS=Arabidopsis thaliana GN=Y-3 PE=1 SV=1	PREDICTED: uncharacterized protein At3g17950 [Vitis vinifera]
comp5967_c0	--	--	Molecular Function: oxidoreductase activity (GO:0016491);;	--	rRNA 2&apos;-O-methyltransferase fibrillarin OS=Drosophila erecta GN=Fib PE=3 SV=1	PREDICTED: uncharacterized protein LOC100841736 [Brachypodium distachyon]
comp532_c0	--	--	Cellular Component: plasma membrane (GO:0005886);; Cellular Component: photosystem I (GO:0009522);; Cellular Component: photosystem II (GO:0009523);; Cellular Component: chloroplast thylakoid membrane (GO:0009535);; Biological Process: response to blue light (GO:0009637);; Biological Process: photosynthesis, light harvesting (GO:0009765);; Cellular Component: chloroplast envelope (GO:0009941);; B…	K08913|1e-136|rcu:RCOM_0483250|chlorophyll A/B binding protein, putative	Chlorophyll a-b binding protein 151, chloroplastic OS=Gossypium hirsutum GN=CAB-151 PE=2 SV=2	RecName: Full=Chlorophyll a-b binding protein 151, chloroplastic; AltName: Full=LHCII type II CAB-151; Short=LHCP; Flags: Precursor
comp20767_c0	--	--	--	--	Translation initiation factor IF-2 OS=Streptomyces griseus subsp. griseus (strain JCM 4626 / NBRC 13350) GN=infB PE=3 SV=1	unnamed protein product [Chondrus crispus]
comp9986_c0	--	--	Biological Process: polysaccharide biosynthetic process (GO:0000271);; Cellular Component: extracellular region (GO:0005576);; Cellular Component: plasma membrane (GO:0005886);; Biological Process: pattern specification process (GO:0007389);; Biological Process: regulation of cell size (GO:0008361);; Cellular Component: plant-type cell wall (GO:0009505);; Cellular Component: plasmodesma (GO:00095…	--	Defensin-like protein 1 OS=Arabidopsis thaliana GN=PDF2.3 PE=2 SV=1	Low-molecular-weight cysteine-rich protein LCR69 precursor, putative [Ricinus communis]
comp14237_c0	[M]	Cell wall/membrane/envelope biogenesis	Cellular Component: Golgi apparatus (GO:0005794);; Cellular Component: plant-type cell wall (GO:0009505);; Cellular Component: plasmodesma (GO:0009506);; Cellular Component: cytoplasmic membrane-bounded vesicle (GO:0016023);; Cellular Component: anchored component of plasma membrane (GO:0046658);;	--	Fasciclin-like arabinogalactan protein 13 OS=Arabidopsis thaliana GN=FLA13 PE=1 SV=1	hypothetical protein PRUPE_ppa022313mg [Prunus persica]
comp339_c0	[J]	Translation, ribosomal structure and biogenesis	Biological Process: mitotic G2 phase (GO:0000085);; Biological Process: RNA methylation (GO:0001510);; Molecular Function: ATP binding (GO:0005524);; Cellular Component: cytosol (GO:0005829);; Biological Process: gluconeogenesis (GO:0006094);; Biological Process: protein folding (GO:0006457);; Biological Process: cytoskeleton organization (GO:0007010);; Biological Process: pyrimidine ribonucleoti…	K09500|0.0|vvi:100257135|hypothetical protein LOC100257135	60S ribosomal protein L4 OS=Prunus armeniaca GN=RPL4 PE=1 SV=1	PREDICTED: T-complex protein 1 subunit theta [Vitis vinifera]
comp2004_c0	[C]	Energy production and conversion	Cellular Component: mitochondrial respiratory chain complex I (GO:0005747);; Molecular Function: NADH dehydrogenase (ubiquinone) activity (GO:0008137);; Cellular Component: integral component of membrane (GO:0016021);; Cellular Component: cytoplasmic membrane-bounded vesicle (GO:0016023);; Biological Process: electron transport chain (GO:0022900);;	K03884|1e-122|osa:6450132|nad6, OrsajM_p11	NADH-ubiquinone oxidoreductase chain 6 OS=Triticum aestivum GN=ND6 PE=3 SV=1	nad6-1 [Triticum aestivum]
comp30319_c0	--	--	--	--	--	PREDICTED: putative ribonuclease H protein At1g65750-like [Fragaria vesca subsp. vesca]
comp34098_c0	--	--	Cellular Component: mitochondrial inner membrane presequence translocase complex (GO:0005744);; Biological Process: protein targeting to mitochondrion (GO:0006626);; Molecular Function: protein-transmembrane transporting ATPase activity (GO:0015462);;	--	Mitochondrial import inner membrane translocase subunit TIM44-2 OS=Arabidopsis thaliana GN=TIM44-2 PE=1 SV=1	Translocase inner membrane subunit 44-2 isoform 2 [Theobroma cacao]
comp35573_c0	--	--	Biological Process: leptotene (GO:0000237);; Biological Process: zygotene (GO:0000238);; Cellular Component: chromatin (GO:0000785);; Cellular Component: condensed nuclear chromosome (GO:0000794);; Cellular Component: nucleoplasm (GO:0005654);; Biological Process: double-strand break repair (GO:0006302);; Biological Process: sister chromatid cohesion (GO:0007062);; Biological Process: reciprocal …	--	--	unnamed protein product [Vitis vinifera]
comp24116_c0	--	--	Cellular Component: mitochondrion (GO:0005739);; Biological Process: metabolic process (GO:0008152);; Molecular Function: transferase activity, transferring acyl groups (GO:0016746);;	--	Pentatricopeptide repeat-containing protein At1g02060, chloroplastic OS=Arabidopsis thaliana GN=At1g02060 PE=2 SV=2	PREDICTED: pentatricopeptide repeat-containing protein At1g02060, chloroplastic-like [Vitis vinifera]
comp3512_c0	--	--	Cellular Component: membrane (GO:0016020);;	--	Regulatory protein E2 OS=Human papillomavirus type 21 GN=E2 PE=3 SV=1	Uncharacterized protein TCM_016791 [Theobroma cacao]
comp11531_c0	[R]	General function prediction only	Biological Process: mitotic G2 phase (GO:0000085);; Biological Process: RNA processing (GO:0006396);; Biological Process: sister chromatid cohesion (GO:0007062);; Biological Process: reciprocal meiotic recombination (GO:0007131);; Biological Process: gamete generation (GO:0007276);; Biological Process: positive regulation of cell proliferation (GO:0008284);; Biological Process: response to xenobi…	K03354|0.0|vvi:100242558|hypothetical protein LOC100242558	Anaphase-promoting complex subunit 7 OS=Arabidopsis thaliana GN=APC7 PE=2 SV=1	PREDICTED: LOW QUALITY PROTEIN: anaphase-promoting complex subunit 7-like [Cucumis sativus]
comp3530_c0	--	--	Cellular Component: integral component of membrane (GO:0016021);;	--	LMBR1 domain-containing protein 2 homolog A OS=Dictyostelium discoideum GN=DDB_G0284019 PE=3 SV=1	Os02g0758100 [Oryza sativa Japonica Group]
comp15642_c0	--	--	Cellular Component: intracellular (GO:0005622);; Biological Process: DNA ligation (GO:0006266);; Molecular Function: double-stranded methylated DNA binding (GO:0010385);; Biological Process: DNA demethylation (GO:0080111);; Biological Process: positive regulation of polynucleotide 3'-phosphatase activity (GO:1901969);; Biological Process: positive regulation of DNA-5-methylcytosine glycosylase ac…	K10803|1e-116|vvi:100266851|hypothetical protein LOC100266851	DNA repair protein XRCC1 OS=Rattus norvegicus GN=Xrcc1 PE=2 SV=2	PREDICTED: uncharacterized protein LOC100266851 [Vitis vinifera]
comp13759_c0	--	--	Molecular Function: protein serine/threonine kinase activity (GO:0004674);; Molecular Function: non-membrane spanning protein tyrosine kinase activity (GO:0004715);; Molecular Function: ATP binding (GO:0005524);; Cellular Component: plasma membrane (GO:0005886);; Biological Process: protein phosphorylation (GO:0006468);; Biological Process: microtubule nucleation (GO:0007020);; Biological Process…	--	Protein NSP-INTERACTING KINASE 3 OS=Arabidopsis thaliana GN=NIK3 PE=1 SV=1	unnamed protein product [Vitis vinifera]
comp16830_c0	--	--	Cellular Component: extracellular region (GO:0005576);; Cellular Component: cytoplasmic membrane-bounded vesicle (GO:0016023);;	--	--	PREDICTED: uncharacterized protein LOC101786121 [Setaria italica]
comp12354_c0	--	--	Cellular Component: integral component of membrane (GO:0016021);;	--	Transmembrane protein 120 homolog OS=Dictyostelium discoideum GN=tmem120 PE=3 SV=1	TMPIT-like protein [Theobroma cacao]
comp11722_c0	--	--	Molecular Function: metalloendopeptidase activity (GO:0004222);; Cellular Component: mitochondrion (GO:0005739);; Biological Process: proteolysis (GO:0006508);; Cellular Component: chloroplast thylakoid membrane (GO:0009535);; Biological Process: methylglyoxal catabolic process to D-lactate (GO:0019243);; Molecular Function: metal ion binding (GO:0046872);;	K01410|0.0|vvi:100262804|hypothetical protein LOC100262804	Mitochondrial intermediate peptidase OS=Pongo abelii GN=MIPEP PE=2 SV=1	PREDICTED: mitochondrial intermediate peptidase [Vitis vinifera]
comp3768_c0	--	--	Molecular Function: structural constituent of ribosome (GO:0003735);; Cellular Component: mitochondrion (GO:0005739);; Cellular Component: ribosome (GO:0005840);; Biological Process: translation (GO:0006412);;	--	50S ribosomal protein L35 OS=Clostridium thermocellum (strain ATCC 27405 / DSM 1237) GN=rpmI PE=3 SV=1	Os10g0579500 [Oryza sativa Japonica Group]
comp5565_c0	[O]	Posttranslational modification, protein turnover, chaperones	Molecular Function: glutathione transferase activity (GO:0004364);; Cellular Component: cytoplasm (GO:0005737);; Biological Process: aromatic amino acid family metabolic process (GO:0009072);; Molecular Function: maleylacetoacetate isomerase activity (GO:0016034);;	K01800|2e-87|vvi:100252270|hypothetical protein LOC100252270	Glutathione S-transferase zeta class OS=Euphorbia esula PE=2 SV=1	Glutathione S-transferase 2 isoform 4 [Theobroma cacao]
comp3009_c0	[O]	Posttranslational modification, protein turnover, chaperones	Molecular Function: ATP binding (GO:0005524);; Cellular Component: mitochondrion (GO:0005739);; Biological Process: ATP catabolic process (GO:0006200);; Biological Process: protein folding (GO:0006457);; Biological Process: response to heat (GO:0009408);; Cellular Component: chloroplast stroma (GO:0009570);; Biological Process: response to high light intensity (GO:0009644);; Cellular Component: c…	--	Chaperone protein ClpB3, mitochondrial OS=Oryza sativa subsp. japonica GN=CLPB3 PE=2 SV=3	chaperone clpb, putative [Ricinus communis]
comp6372_c0	--	--	Cellular Component: cytoplasm (GO:0005737);;	--	LisH domain and HEAT repeat-containing protein KIAA1468 homolog OS=Xenopus tropicalis PE=2 SV=1	PREDICTED: lisH domain and HEAT repeat-containing protein KIAA1468 homolog [Vitis vinifera]
comp11343_c0	--	--	Molecular Function: nicotinamide-nucleotide adenylyltransferase activity (GO:0000309);; Molecular Function: nicotinate-nucleotide adenylyltransferase activity (GO:0004515);; Cellular Component: mitochondrion (GO:0005739);; Biological Process: NAD biosynthetic process (GO:0009435);; Biological Process: pollen development (GO:0009555);; Biological Process: pollen tube growth (GO:0009860);;	K06210|2e-35|vvi:100251521|similar to ATNMNAT (A. THALIANA NICOTINATE/NICOTINAMIDE MONONUCLEOTIDE ADENYLTRANSFERASE)	Nicotinamide mononucleotide adenylyltransferase 2 OS=Danio rerio GN=nmnat2 PE=2 SV=1	PREDICTED: nicotinamide mononucleotide adenylyltransferase 1-like isoform X1 [Cicer arietinum]
comp34658_c0	--	--	--	--	--	hypothetical protein PRUPE_ppa019748mg, partial [Prunus persica]
comp12417_c0	[V]	Defense mechanisms	Cellular Component: plant-type vacuole (GO:0000325);; Molecular Function: ATP binding (GO:0005524);; Cellular Component: vacuolar membrane (GO:0005774);; Cellular Component: plasma membrane (GO:0005886);; Biological Process: ATP catabolic process (GO:0006200);; Molecular Function: xenobiotic-transporting ATPase activity (GO:0008559);; Biological Process: response to aluminum ion (GO:0010044);; Mo…	--	ABC transporter B family member 25 OS=Oryza sativa subsp. japonica GN=OsABCB25 PE=2 SV=1	PREDICTED: ABC transporter B family member 25-like [Vitis vinifera]
comp4916_c0	--	--	Cellular Component: Golgi apparatus (GO:0005794);; Cellular Component: plasma membrane (GO:0005886);; Molecular Function: protein transporter activity (GO:0008565);; Biological Process: protein transport (GO:0015031);;	K09481|2e-47|vvi:100260422|hypothetical protein LOC100260422	Protein transport protein Sec61 subunit beta OS=Arabidopsis thaliana GN=At2g45070 PE=2 SV=1	PREDICTED: protein transport protein Sec61 subunit beta-like [Glycine max]
comp20946_c0	--	--	Cellular Component: nucleus (GO:0005634);; Cellular Component: mitochondrion (GO:0005739);; Cellular Component: cytosol (GO:0005829);; Biological Process: mitosis (GO:0007067);; Cellular Component: chloroplast (GO:0009507);;	K11267|8e-18|rcu:RCOM_1032140|androgen induced inhibitor of proliferation (as3) / pds5, putative	--	androgen induced inhibitor of proliferation (as3) / pds5, putative [Ricinus communis]
comp21095_c0	--	--	Cellular Component: plant-type cell wall (GO:0009505);; Cellular Component: plasmodesma (GO:0009506);;	--	Formin-like protein 5 OS=Oryza sativa subsp. japonica GN=FH5 PE=2 SV=2	unnamed protein product [Vitis vinifera]
comp9678_c0	[M]	Cell wall/membrane/envelope biogenesis	--	K10293|1e-94|vvi:100246319|hypothetical protein LOC100246319	F-box protein SKIP22 OS=Arabidopsis thaliana GN=SKIP22 PE=1 SV=1	PREDICTED: F-box protein SKIP22 [Vitis vinifera]
comp5425_c0	--	--	Cellular Component: plastid (GO:0009536);;	--	--	conserved hypothetical protein [Ricinus communis]
comp11277_c0	--	--	Biological Process: protein peptidyl-prolyl isomerization (GO:0000413);; Molecular Function: peptidyl-prolyl cis-trans isomerase activity (GO:0003755);; Molecular Function: FK506 binding (GO:0005528);; Cellular Component: nucleus (GO:0005634);; Biological Process: mitotic recombination (GO:0006312);; Biological Process: protein folding (GO:0006457);; Cellular Component: chloroplast thylakoid lume…	--	Peptidyl-prolyl cis-trans isomerase FKBP43 OS=Arabidopsis thaliana GN=FKBP43 PE=2 SV=1	hypothetical protein PRUPE_ppa024757mg [Prunus persica]
comp25338_c0	--	--	Molecular Function: transporter activity (GO:0005215);; Cellular Component: mitochondrion (GO:0005739);; Biological Process: transport (GO:0006810);; Cellular Component: membrane (GO:0016020);;	--	Probable peptide/nitrate transporter At1g33440 OS=Arabidopsis thaliana GN=At1g33440 PE=2 SV=1	PREDICTED: nitrate transporter 1.2-like isoform X1 [Setaria italica]
comp6582_c0	--	--	Molecular Function: ubiquitin-protein ligase activity (GO:0004842);; Cellular Component: nucleus (GO:0005634);; Biological Process: ubiquitin-dependent protein catabolic process (GO:0006511);;	--	F-box/LRR-repeat protein 12 OS=Arabidopsis thaliana GN=FBL12 PE=2 SV=1	Os11g0264200 [Oryza sativa Japonica Group]
comp16235_c0	--	--	--	--	--	hypothetical protein EMIHUDRAFT_468883 [Emiliania huxleyi CCMP1516]
comp17818_c0	--	--	Molecular Function: catalytic activity (GO:0003824);; Cellular Component: cell wall (GO:0005618);; Cellular Component: plasma membrane (GO:0005886);; Biological Process: defense response (GO:0006952);; Biological Process: signal transduction (GO:0007165);; Cellular Component: plasmodesma (GO:0009506);; Cellular Component: chloroplast (GO:0009507);; Cellular Component: cytoplasmic membrane-bounded…	--	DNA-damage-repair/toleration protein DRT100 OS=Arabidopsis thaliana GN=DRT100 PE=2 SV=2	DNA-damage-repair/toleration protein DRT100-like precursor [Glycine max]
comp37949_c0	--	--	--	--	--	hypothetical protein VITISV_038066 [Vitis vinifera]
comp8561_c0	--	--	Molecular Function: ubiquitin thiolesterase activity (GO:0004221);; Biological Process: ubiquitin-dependent protein catabolic process (GO:0006511);;	--	Uncharacterized membrane protein At1g16860 OS=Arabidopsis thaliana GN=At1g16860 PE=1 SV=1	PREDICTED: uncharacterized membrane protein At1g16860-like [Solanum lycopersicum]
comp12365_c0	[I]	Lipid transport and metabolism	Biological Process: response to cold (GO:0009409);; Biological Process: response to water deprivation (GO:0009414);; Cellular Component: plastid (GO:0009536);; Biological Process: response to abscisic acid (GO:0009737);; Molecular Function: hydrolase activity (GO:0016787);; Biological Process: hyperosmotic salinity response (GO:0042538);;	--	Monoglyceride lipase OS=Homo sapiens GN=MGLL PE=1 SV=2	hypothetical protein CARUB_v10020236mg [Capsella rubella]
comp710_c0	--	--	--	--	Kiwellin OS=Actinidia deliciosa PE=1 SV=1	Ripening-related protein grip22 [Medicago truncatula]
comp18096_c0	--	--	Biological Process: response to stimulus (GO:0050896);;	--	Uncharacterized protein DKFZp434B061 OS=Homo sapiens PE=2 SV=2	Uncharacterized protein TCM_002034 [Theobroma cacao]
comp752_c0	[F]	Nucleotide transport and metabolism	Molecular Function: formate-tetrahydrofolate ligase activity (GO:0004329);; Molecular Function: copper ion binding (GO:0005507);; Molecular Function: ATP binding (GO:0005524);; Cellular Component: cytosol (GO:0005829);; Cellular Component: plasma membrane (GO:0005886);; Biological Process: folic acid-containing compound biosynthetic process (GO:0009396);; Cellular Component: chloroplast (GO:00095…	--	Formate--tetrahydrofolate ligase OS=Arabidopsis thaliana GN=THFS PE=1 SV=1	10-formyltetrahydrofolate synthetase isoform 1 [Theobroma cacao]
comp42671_c0	--	--	Cellular Component: membrane (GO:0016020);;	--	Putative protein TPRXL OS=Homo sapiens GN=TPRXL PE=5 SV=2	predicted protein [Populus trichocarpa]
comp11764_c0	[S]	Function unknown	Molecular Function: catalytic activity (GO:0003824);; Cellular Component: vacuole (GO:0005773);; Biological Process: metabolic process (GO:0008152);; Cellular Component: plant-type cell wall (GO:0009505);;	K09955|6e-63|vvi:100246702|hypothetical protein LOC100246702	Formin-like protein 5 OS=Oryza sativa subsp. japonica GN=FH5 PE=2 SV=2	hypothetical protein MTR_4g065150 [Medicago truncatula]
comp35926_c0	--	--	Cellular Component: cytoplasm (GO:0005737);; Biological Process: biosynthetic process (GO:0009058);; Molecular Function: oxidoreductase activity, acting on paired donors, with incorporation or reduction of molecular oxygen, 2-oxoglutarate as one donor, and incorporation of one atom each of oxygen into both donors (GO:0016706);; Biological Process: single-organism metabolic process (GO:0044710);;	--	Feruloyl CoA ortho-hydroxylase 2 OS=Arabidopsis thaliana GN=F6&apos;H2 PE=1 SV=1	unnamed protein product [Vitis vinifera]
comp34590_c0	--	--	Molecular Function: hydrolase activity, hydrolyzing O-glycosyl compounds (GO:0004553);; Cellular Component: cell wall (GO:0005618);; Biological Process: cellular glucan metabolic process (GO:0006073);; Molecular Function: xyloglucan:xyloglucosyl transferase activity (GO:0016762);; Cellular Component: apoplast (GO:0048046);;	K08235|3e-83|pop:POPTR_572886|hypothetical protein	Brassinosteroid-regulated protein BRU1 OS=Glycine max PE=2 SV=1	unnamed protein product [Vitis vinifera]
comp23340_c0	--	--	Molecular Function: catalytic activity (GO:0003824);;	--	Retrovirus-related Pol polyprotein from transposon TNT 1-94 OS=Nicotiana tabacum PE=2 SV=1	hypothetical protein VITISV_041073 [Vitis vinifera]
comp7112_c0	--	--	Biological Process: macromolecule metabolic process (GO:0043170);; Biological Process: cellular metabolic process (GO:0044237);; Biological Process: primary metabolic process (GO:0044238);; Biological Process: cellular response to stimulus (GO:0051716);;	--	Aspartic proteinase-like protein 2 OS=Arabidopsis thaliana GN=At1g65240 PE=1 SV=2	TPA: hypothetical protein ZEAMMB73_168363 [Zea mays]
comp37747_c0	--	--	Molecular Function: nucleic acid binding (GO:0003676);; Biological Process: DNA metabolic process (GO:0006259);;	--	--	F5M15.26 [Arabidopsis thaliana]
comp24146_c0	[J]	Translation, ribosomal structure and biogenesis	Biological Process: cell adhesion (GO:0007155);; Biological Process: response to salt stress (GO:0009651);; Biological Process: multidimensional cell growth (GO:0009825);; Cellular Component: external side of plasma membrane (GO:0009897);; Molecular Function: polysaccharide binding (GO:0030247);; Cellular Component: anchored component of plasma membrane (GO:0046658);;	--	Fasciclin-like arabinogalactan protein 4 OS=Arabidopsis thaliana GN=FLA4 PE=1 SV=1	predicted protein [Hordeum vulgare subsp. vulgare]
comp12027_c0	--	--	Molecular Function: hydrolase activity (GO:0016787);;	--	MATH domain-containing protein At5g43560 OS=Arabidopsis thaliana GN=At5g43560 PE=1 SV=1	hypothetical protein VITISV_031499 [Vitis vinifera]
comp16259_c0	--	--	--	--	Zinc finger protein MAGPIE OS=Arabidopsis thaliana GN=MGP PE=1 SV=1	Indeterminate(ID)-domain 2 [Theobroma cacao]
comp18917_c0	--	--	Biological Process: cytokinesis by cell plate formation (GO:0000911);; Cellular Component: cytoplasm (GO:0005737);; Biological Process: response to cyclopentenone (GO:0010583);; Biological Process: spindle assembly (GO:0051225);;	--	Protein FAM179B OS=Mus musculus GN=Fam179b PE=2 SV=2	PREDICTED: protein FAM179B-like [Vitis vinifera]
comp4378_c1	--	--	Cellular Component: cytoplasmic membrane-bounded vesicle (GO:0016023);;	--	Heme-binding protein 2 OS=Homo sapiens GN=HEBP2 PE=1 SV=1	PREDICTED: heme-binding protein 2 [Vitis vinifera]
comp106_c0	--	--	Cellular Component: plastid (GO:0009536);;	--	YTH domain family protein 2 OS=Bos taurus GN=YTHDF2 PE=2 SV=1	PREDICTED: uncharacterized protein LOC100253534 [Vitis vinifera]
comp1237_c0	[J]	Translation, ribosomal structure and biogenesis	Cellular Component: cytosol (GO:0005829);; Cellular Component: large ribosomal subunit (GO:0015934);; Biological Process: primary metabolic process (GO:0044238);; Biological Process: cellular macromolecule metabolic process (GO:0044260);;	K02937|1e-104|vvi:100267028|hypothetical protein LOC100267028	60S ribosomal protein L7-2 OS=Arabidopsis thaliana GN=RPL7B PE=1 SV=1	Ribosomal protein L30/L7 family protein isoform 1 [Theobroma cacao]
comp11302_c0	[D]	Cell cycle control, cell division, chromosome partitioning	--	--	Uncharacterized protein LOC284861 OS=Homo sapiens PE=2 SV=1	Early nodulin-like protein 18 isoform 1 [Theobroma cacao]
comp13670_c0	--	--	--	--	--	PHD zinc finger protein-like [Oryza sativa Japonica Group]
comp9326_c0	[U]	Intracellular trafficking, secretion, and vesicular transport	Molecular Function: peptidase activity (GO:0008233);; Biological Process: gene expression (GO:0010467);; Cellular Component: membrane (GO:0016020);; Biological Process: cellular component organization (GO:0016043);; Biological Process: RNA metabolic process (GO:0016070);; Biological Process: protein metabolic process (GO:0019538);; Biological Process: single-organism cellular process (GO:0044763)…	--	Chloroplast processing peptidase OS=Arabidopsis thaliana GN=PLSP1 PE=2 SV=2	Plastidic type i signal peptidase 1 isoform 2 [Theobroma cacao]
comp18627_c0	[R]	General function prediction only	Cellular Component: chromatin (GO:0000785);; Cellular Component: nucleus (GO:0005634);; Molecular Function: zinc ion binding (GO:0008270);; Biological Process: regulation of flower development (GO:0009909);; Biological Process: gene silencing (GO:0016458);; Molecular Function: histone-lysine N-methyltransferase activity (GO:0018024);; Biological Process: histone lysine methylation (GO:0034968);;	--	Histone-lysine N-methyltransferase ASHR3 OS=Arabidopsis thaliana GN=ASHR3 PE=1 SV=1	PREDICTED: histone-lysine N-methyltransferase ASHR3 [Vitis vinifera]
comp16101_c0	--	--	Molecular Function: protein kinase activity (GO:0004672);; Molecular Function: potassium channel activity (GO:0005267);; Molecular Function: calmodulin binding (GO:0005516);; Cellular Component: plasma membrane (GO:0005886);; Biological Process: potassium ion transport (GO:0006813);; Cellular Component: integral component of membrane (GO:0016021);; Molecular Function: cyclic nucleotide binding (G…	--	Probable cyclic nucleotide-gated ion channel 5 OS=Arabidopsis thaliana GN=CNGC5 PE=2 SV=1	unnamed protein product [Vitis vinifera]
comp10422_c0	--	--	Cellular Component: mitochondrion (GO:0005739);; Biological Process: regulation of transcription, DNA-templated (GO:0006355);; Cellular Component: chloroplast stroma (GO:0009570);; Biological Process: chloroplast organization (GO:0009658);;	--	Cytochrome c oxidase assembly factor 5 OS=Xenopus tropicalis GN=coa5 PE=3 SV=1	conserved hypothetical protein [Ricinus communis]
comp44789_c0	--	--	--	--	--	hypothetical protein SORBIDRAFT_01g013040 [Sorghum bicolor]
comp803_c0	[R]	General function prediction only	Molecular Function: nucleotide binding (GO:0000166);; Biological Process: formation of translation preinitiation complex (GO:0001731);; Molecular Function: translation initiation factor activity (GO:0003743);; Cellular Component: nucleus (GO:0005634);; Cellular Component: cytosol (GO:0005829);; Cellular Component: eukaryotic translation initiation factor 3 complex (GO:0005852);; Biological Proces…	K03253|0.0|vvi:100244090|hypothetical protein LOC100244090	Eukaryotic translation initiation factor 3 subunit B OS=Nicotiana tabacum GN=TIF3B1 PE=2 SV=1	PREDICTED: eukaryotic translation initiation factor 3 subunit B [Vitis vinifera]
comp5505_c0	[RTKL]	--	Molecular Function: protein serine/threonine kinase activity (GO:0004674);; Molecular Function: protein serine/threonine/tyrosine kinase activity (GO:0004712);; Molecular Function: ATP binding (GO:0005524);; Cellular Component: nucleus (GO:0005634);; Biological Process: protein phosphorylation (GO:0006468);;	--	Serine/threonine-protein kinase SRPK OS=Physarum polycephalum PE=1 SV=1	PREDICTED: serine/threonine-protein kinase SRPK2 [Vitis vinifera]
comp9613_c0	[D]	Cell cycle control, cell division, chromosome partitioning	Biological Process: mitotic cell cycle (GO:0000278);; Biological Process: double-strand break repair via homologous recombination (GO:0000724);; Molecular Function: ATP binding (GO:0005524);; Cellular Component: nucleus (GO:0005634);; Biological Process: DNA-dependent DNA replication (GO:0006261);; Biological Process: regulation of DNA replication (GO:0006275);; Biological Process: DNA methylatio…	--	Structural maintenance of chromosomes protein 6 OS=Xenopus laevis GN=smc6 PE=2 SV=1	PREDICTED: structural maintenance of chromosomes protein 6-like [Vitis vinifera]
comp2977_c0	[R]	General function prediction only	Molecular Function: ARF guanyl-nucleotide exchange factor activity (GO:0005086);; Cellular Component: nucleus (GO:0005634);; Cellular Component: cytosol (GO:0005829);; Biological Process: megagametogenesis (GO:0009561);; Biological Process: regulation of ARF protein signal transduction (GO:0032012);;	--	Brefeldin A-inhibited guanine nucleotide-exchange protein 2 OS=Arabidopsis thaliana GN=BIG2 PE=2 SV=1	cytohesin 1, 2, 3, putative [Ricinus communis]
comp7189_c0	[S]	Function unknown	Cellular Component: chloroplast inner membrane (GO:0009706);; Cellular Component: integral component of membrane (GO:0016021);; Biological Process: root hair elongation (GO:0048767);;	--	Uncharacterized membrane protein sll0875 OS=Synechocystis sp. (strain PCC 6803 / Kazusa) GN=sll0875 PE=3 SV=1	conserved hypothetical protein [Ricinus communis]
comp11647_c0	--	--	--	--	Microspherule protein 1 OS=Mus musculus GN=Mcrs1 PE=1 SV=1	PREDICTED: uncharacterized protein LOC100254089 [Vitis vinifera]
comp19788_c0	[IQR]	--	Molecular Function: oxidoreductase activity (GO:0016491);; Biological Process: oxidation-reduction process (GO:0055114);;	--	Carbonyl reductase [NADPH] 1 OS=Mus musculus GN=Cbr1 PE=1 SV=3	hypothetical protein SORBIDRAFT_03g044750 [Sorghum bicolor]
comp19042_c0	[P]	Inorganic ion transport and metabolism	Molecular Function: magnesium ion binding (GO:0000287);; Molecular Function: phospholipid-translocating ATPase activity (GO:0004012);; Molecular Function: ATP binding (GO:0005524);; Cellular Component: plasma membrane (GO:0005886);; Biological Process: cation transport (GO:0006812);; Cellular Component: chloroplast envelope (GO:0009941);; Biological Process: phospholipid transport (GO:0015914);; …	K01530|1e-158|pop:POPTR_421641|aminophospholipid ATPase	Phospholipid-transporting ATPase 10 OS=Arabidopsis thaliana GN=ALA10 PE=1 SV=1	aminophospholipid ATPase [Populus trichocarpa]
comp16254_c0	--	--	Molecular Function: phospholipid binding (GO:0005543);; Biological Process: auxin-activated signaling pathway (GO:0009734);; Biological Process: phloem or xylem histogenesis (GO:0010087);; Biological Process: leaf vascular tissue pattern formation (GO:0010305);;	--	Extensin OS=Nicotiana tabacum GN=HRGPNT3 PE=2 SV=1	PREDICTED: uncharacterized protein LOC101767178 [Setaria italica]
comp3230_c0	--	--	Biological Process: leaf development (GO:0048366);;	--	GRF1-interacting factor 1 OS=Arabidopsis thaliana GN=GIF1 PE=1 SV=1	predicted protein [Populus trichocarpa]
comp10254_c0	--	--	--	--	--	hypothetical protein ARALYDRAFT_473465 [Arabidopsis lyrata subsp. lyrata]
comp8801_c0	--	--	--	--	Translation initiation factor IF-2 OS=Frankia sp. (strain EAN1pec) GN=infB PE=3 SV=1	Uncharacterized protein TCM_003618 [Theobroma cacao]
comp1655_c0	[J]	Translation, ribosomal structure and biogenesis	--	--	Serine/arginine repetitive matrix protein 2 OS=Homo sapiens GN=SRRM2 PE=1 SV=2	Uncharacterized protein TCM_021816 [Theobroma cacao]
comp6596_c0	[IQ]	--	Cellular Component: mitochondrion (GO:0005739);; Cellular Component: peroxisome (GO:0005777);; Molecular Function: o-succinylbenzoate-CoA ligase activity (GO:0008756);; Biological Process: chlorophyll catabolic process (GO:0015996);; Molecular Function: AMP binding (GO:0016208);;	--	Probable acyl-activating enzyme 1, peroxisomal OS=Arabidopsis thaliana GN=AAE1 PE=2 SV=1	PREDICTED: putative acyl-CoA synthetase YngI-like [Vitis vinifera]
comp38093_c0	--	--	Molecular Function: binding (GO:0005488);; Molecular Function: transferase activity, transferring phosphorus-containing groups (GO:0016772);;	--	--	hypothetical protein VITISV_008771 [Vitis vinifera]
comp2371_c0	[O]	Posttranslational modification, protein turnover, chaperones	Molecular Function: peptide-methionine (S)-S-oxide reductase activity (GO:0008113);; Cellular Component: chloroplast stroma (GO:0009570);; Molecular Function: peptide-methionine (R)-S-oxide reductase activity (GO:0033743);; Biological Process: oxidation-reduction process (GO:0055114);;	--	Peptide methionine sulfoxide reductase B1, chloroplastic OS=Oryza sativa subsp. japonica GN=MSRB1 PE=2 SV=2	hypothetical protein SORBIDRAFT_10g008790 [Sorghum bicolor]
comp38242_c0	[J]	Translation, ribosomal structure and biogenesis	--	--	Translation initiation factor IF-2 OS=Rhodococcus opacus (strain B4) GN=infB PE=3 SV=1	Uncharacterized protein TCM_015003 [Theobroma cacao]
comp10005_c0	--	--	Molecular Function: nucleic acid binding (GO:0003676);; Biological Process: DNA metabolic process (GO:0006259);; Biological Process: transport (GO:0006810);; Molecular Function: metal ion binding (GO:0046872);;	--	--	retrotransposon protein, putative, Ty3-gypsy subclass [Oryza sativa Japonica Group]
comp14999_c0	--	--	Molecular Function: transporter activity (GO:0005215);; Cellular Component: plasma membrane (GO:0005886);; Biological Process: transport (GO:0006810);; Cellular Component: plastid (GO:0009536);; Cellular Component: integral component of membrane (GO:0016021);;	--	Patellin-6 OS=Arabidopsis thaliana GN=PATL6 PE=2 SV=1	Sec14-like protein [Solanum pennellii]
comp27056_c0	--	--	Cellular Component: cytoplasmic membrane-bounded vesicle (GO:0016023);; Biological Process: RNA metabolic process (GO:0016070);;	--	Pentatricopeptide repeat-containing protein At3g62890 OS=Arabidopsis thaliana GN=PCMP-H82 PE=2 SV=1	hypothetical protein TRIUR3_08173 [Triticum urartu]
comp11634_c0	--	--	Molecular Function: sequence-specific DNA binding transcription factor activity (GO:0003700);; Cellular Component: nucleus (GO:0005634);; Biological Process: regulation of transcription, DNA-templated (GO:0006355);; Biological Process: cell adhesion (GO:0007155);; Biological Process: phototropism (GO:0009638);; Biological Process: response to ethylene (GO:0009723);; Biological Process: auxin-acti…	--	Auxin response factor 19 OS=Arabidopsis thaliana GN=ARF19 PE=1 SV=2	Transcriptional factor B3 family protein / auxin-responsive factor AUX/IAA-related isoform 2 [Theobroma cacao]
comp41755_c0	--	--	--	--	Lysine-specific demethylase PHF2 OS=Mus musculus GN=Phf2 PE=1 SV=2	unnamed protein product [Vitis vinifera]
comp5592_c0	[D]	Cell cycle control, cell division, chromosome partitioning	Molecular Function: GTPase activity (GO:0003924);; Molecular Function: structural molecule activity (GO:0005198);; Molecular Function: GTP binding (GO:0005525);; Biological Process: GTP catabolic process (GO:0006184);; Cellular Component: chloroplast thylakoid (GO:0009534);; Cellular Component: chloroplast stroma (GO:0009570);; Biological Process: chloroplast fission (GO:0010020);; Cellular Compo…	K03531|0.0|vvi:100251032|hypothetical protein LOC100251032	Cell division protein FtsZ homolog 2-1, chloroplastic OS=Arabidopsis thaliana GN=FTSZ2-1 PE=1 SV=2	Tubulin/FtsZ family protein isoform 1 [Theobroma cacao]
comp26834_c0	[D]	Cell cycle control, cell division, chromosome partitioning	--	--	Synaptonemal complex protein 2 OS=Arabidopsis thaliana GN=ZYP1B PE=2 SV=1	H0505F09.1 [Oryza sativa Indica Group]
comp8533_c0	--	--	--	--	--	sulfate transporter [Jatropha curcas]
comp36099_c0	--	--	--	--	Uncharacterized 29.3 kDa protein OS=Orgyia pseudotsugata multicapsid polyhedrosis virus GN=ORF92 PE=4 SV=1	Mitochondrial transcription termination factor family protein [Theobroma cacao]
comp44651_c0	--	--	Molecular Function: DNA binding (GO:0003677);; Cellular Component: mitochondrion (GO:0005739);; Biological Process: DNA recombination (GO:0006310);;	K12619|7e-22|osa:4349826|Os11g0157000	Uncharacterized mitochondrial protein AtMg00300 OS=Arabidopsis thaliana GN=AtMg00300 PE=4 SV=1	hypothetical protein VITISV_022473 [Vitis vinifera]
comp5866_c0	--	--	Molecular Function: ubiquitin-protein ligase activity (GO:0004842);; Molecular Function: protein binding (GO:0005515);; Cellular Component: nucleus (GO:0005634);; Biological Process: protein ubiquitination (GO:0016567);; Biological Process: lateral root development (GO:0048527);;	--	Protein ARABIDILLO 1 OS=Arabidopsis thaliana GN=FBX5 PE=1 SV=1	ubiquitin-protein ligase, putative [Ricinus communis]
comp3874_c0	[GEPR]	--	Biological Process: signal transduction (GO:0007165);; Molecular Function: carbohydrate transmembrane transporter activity (GO:0015144);; Cellular Component: membrane (GO:0016020);; Biological Process: cellular component organization (GO:0016043);; Biological Process: cellular response to stress (GO:0033554);; Biological Process: carboxylic acid transport (GO:0046942);; Biological Process: transm…	--	Organic cation/carnitine transporter 7 OS=Arabidopsis thaliana GN=OCT7 PE=2 SV=1	PREDICTED: synaptic vesicle 2-related protein [Vitis vinifera]
comp10245_c0	[HI]	--	Cellular Component: mitochondrion (GO:0005739);; Molecular Function: 1-deoxy-D-xylulose-5-phosphate synthase activity (GO:0008661);; Biological Process: terpenoid biosynthetic process (GO:0016114);;	K01662|0.0|rcu:RCOM_1053880|1-deoxyxylulose-5-phosphate synthase, putative (EC:2.2.1.7)	Probable 1-deoxy-D-xylulose-5-phosphate synthase, chloroplastic OS=Capsicum annuum GN=TKT2 PE=2 SV=1	1-deoxy-D-xylulose 5-phosphate synthase 3 isoform 1 [Theobroma cacao]
comp10368_c0	[R]	General function prediction only	Cellular Component: mitochondrion (GO:0005739);; Biological Process: cellular aromatic compound metabolic process (GO:0006725);; Molecular Function: hydrolase activity (GO:0016787);;	--	Formin-like protein 16 OS=Oryza sativa subsp. japonica GN=FH16 PE=2 SV=1	uncharacterized protein LOC100194292 [Zea mays]
comp6154_c0	[DZ]	--	Molecular Function: phospholipid binding (GO:0005543);; Cellular Component: plasma membrane (GO:0005886);; Cellular Component: cell cortex (GO:0005938);; Biological Process: cortical protein anchoring (GO:0032065);; Molecular Function: metal ion binding (GO:0046872);;	--	Ultraviolet-B receptor UVR8 OS=Arabidopsis thaliana GN=UVR8 PE=1 SV=1	Regulator of chromosome condensation (RCC1) family with FYVE zinc finger domain isoform 1 [Theobroma cacao]
comp42031_c0	--	--	--	--	Pentatricopeptide repeat-containing protein At3g53360, mitochondrial OS=Arabidopsis thaliana GN=PCMP-E86 PE=2 SV=1	hypothetical protein OsJ_21486 [Oryza sativa Japonica Group]
comp6303_c0	--	--	Biological Process: response to stress (GO:0006950);; Cellular Component: plastid (GO:0009536);;	--	--	unnamed protein product [Vitis vinifera]
comp8368_c0	--	--	Cellular Component: membrane (GO:0016020);; Biological Process: cellular component organization (GO:0016043);; Biological Process: response to chemical (GO:0042221);; Biological Process: cellular protein metabolic process (GO:0044267);; Cellular Component: intracellular part (GO:0044424);; Biological Process: single-organism cellular process (GO:0044763);; Biological Process: regulation of cellul…	K06692|0.0|vvi:100260719|hypothetical protein LOC100260719	26S proteasome non-ATPase regulatory subunit 5 OS=Bos taurus GN=PSMD5 PE=2 SV=1	ARM repeat superfamily protein [Theobroma cacao]
comp30979_c0	--	--	--	K13412|4e-12|osa:4334366|Os03g0788500	Calcium-dependent protein kinase 20 OS=Arabidopsis thaliana GN=CPK20 PE=2 SV=1	TPA: putative calcium-dependent protein kinase family protein [Zea mays]
comp11747_c0	--	--	Biological Process: nuclear-transcribed mRNA catabolic process (GO:0000956);; Biological Process: vernalization response (GO:0010048);;	--	--	unnamed protein product [Vitis vinifera]
comp2535_c0	[C]	Energy production and conversion	Molecular Function: ATP citrate synthase activity (GO:0003878);; Molecular Function: succinate-CoA ligase (ADP-forming) activity (GO:0004775);; Molecular Function: ATP binding (GO:0005524);; Cellular Component: cytosol (GO:0005829);; Biological Process: acetyl-CoA biosynthetic process (GO:0006085);; Biological Process: protein targeting to vacuole (GO:0006623);; Biological Process: lipid metaboli…	K01648|3e-93|rcu:RCOM_1436330|ATP-citrate synthase, putative (EC:6.2.1.5)	ATP-citrate synthase alpha chain protein 3 OS=Arabidopsis thaliana GN=ACLA-3 PE=2 SV=1	ATP-citrate synthase [Camellia sinensis]
comp4023_c0	--	--	Biological Process: cellular metabolic process (GO:0044237);;	--	Protein FAM188A OS=Mus musculus GN=Fam188a PE=1 SV=2	unnamed protein product [Vitis vinifera]
comp2083_c0	[R]	General function prediction only	Molecular Function: nucleotide binding (GO:0000166);; Molecular Function: RNA binding (GO:0003723);; Cellular Component: nucleus (GO:0005634);;	K14396|1e-143|rcu:RCOM_0768330|poly-A binding protein, putative	Polyadenylate-binding protein 2 OS=Schizosaccharomyces pombe (strain 972 / ATCC 24843) GN=pab2 PE=3 SV=1	hypothetical protein PRUPE_ppa011157mg [Prunus persica]
comp13750_c0	--	--	Molecular Function: organic cyclic compound binding (GO:0097159);; Molecular Function: heterocyclic compound binding (GO:1901363);;	--	--	hypothetical protein F775_01472 [Aegilops tauschii]
comp859_c0	--	--	Molecular Function: structural constituent of ribosome (GO:0003735);; Cellular Component: nucleolus (GO:0005730);; Cellular Component: plasma membrane (GO:0005886);; Biological Process: translation (GO:0006412);; Cellular Component: chloroplast (GO:0009507);; Cellular Component: cytosolic ribosome (GO:0022626);; Biological Process: growth (GO:0040007);;	K02991|4e-29|vvi:100251294|hypothetical protein LOC100251294	40S ribosomal protein S6 (Fragment) OS=Nicotiana tabacum GN=RPS6 PE=2 SV=2	ribosomal protein S6 [Nicotiana tabacum]
comp6437_c0	[R]	General function prediction only	--	--	--	PREDICTED: uncharacterized protein LOC100263058 [Vitis vinifera]
comp7665_c0	[E]	Amino acid transport and metabolism	Cellular Component: cytosol (GO:0005829);; Biological Process: tryptophan catabolic process (GO:0006569);; Biological Process: response to symbiotic fungus (GO:0009610);; Biological Process: indoleacetic acid biosynthetic process (GO:0009684);; Biological Process: cysteine biosynthetic process (GO:0019344);; Biological Process: L-cysteine catabolic process to pyruvate (GO:0019450);; Molecular Fun…	--	Serine/arginine repetitive matrix protein 1 OS=Mus musculus GN=Srrm1 PE=1 SV=2	hypothetical protein CARUB_v10017227mg [Capsella rubella]
comp7784_c0	[S]	Function unknown	Cellular Component: plasma membrane (GO:0005886);;	--	TVP38/TMEM64 family membrane protein slr0305 OS=Synechocystis sp. (strain PCC 6803 / Kazusa) GN=slr0305 PE=3 SV=1	PREDICTED: TVP38/TMEM64 family membrane protein slr0305-like [Brachypodium distachyon]
comp5035_c0	[R]	General function prediction only	--	--	--	predicted protein [Populus trichocarpa]
comp14486_c0	--	--	--	--	--	PREDICTED: uncharacterized protein LOC101246541 [Solanum lycopersicum]
comp24743_c0	--	--	--	--	--	RNA-directed DNA polymerase (reverse transcriptase)-related family protein [Arabidopsis thaliana]
comp20145_c0	--	--	Molecular Function: zinc ion binding (GO:0008270);;	--	--	unnamed protein product [Vitis vinifera]
comp12372_c0	--	--	Molecular Function: transporter activity (GO:0005215);; Cellular Component: plasma membrane (GO:0005886);; Biological Process: oligopeptide transport (GO:0006857);; Biological Process: response to nematode (GO:0009624);;	--	Probable peptide/nitrate transporter At2g40460 OS=Arabidopsis thaliana GN=At2g40460 PE=2 SV=2	PREDICTED: probable peptide/nitrate transporter At2g40460 [Vitis vinifera]
comp7719_c0	--	--	--	--	Ribonuclease inhibitor OS=Sus scrofa GN=RNH1 PE=1 SV=1	RNI-like superfamily protein, putative [Theobroma cacao]
comp12431_c0	--	--	--	--	SprT-like domain-containing protein Spartan OS=Caenorhabditis elegans GN=dvc-1 PE=1 SV=1	hypothetical protein SELMODRAFT_447527 [Selaginella moellendorffii]
comp15430_c0	--	--	Cellular Component: mitochondrion (GO:0005739);;	--	--	Os05g0532800 [Oryza sativa Japonica Group]
comp13675_c0	--	--	--	K11518|3e-08|ppp:PHYPADRAFT_199375|hypothetical protein	--	ISP42-like protein [Picea mariana]
comp14254_c0	--	--	Cellular Component: Golgi membrane (GO:0000139);; Molecular Function: protein binding (GO:0005515);; Cellular Component: mitochondrion (GO:0005739);; Cellular Component: endosome (GO:0005768);; Cellular Component: trans-Golgi network (GO:0005802);; Biological Process: xyloglucan metabolic process (GO:0010411);; Molecular Function: xyloglucan 6-xylosyltransferase activity (GO:0033843);; Biological…	K08238|3e-37|ath:AT1G74380|XXT5	Putative glycosyltransferase 5 OS=Arabidopsis thaliana GN=GT5 PE=2 SV=1	galactosyl transferase GMA12/MNN10 family protein [Arabidopsis lyrata subsp. lyrata]
comp13919_c0	[H]	Coenzyme transport and metabolism	Molecular Function: FMN adenylyltransferase activity (GO:0003919);; Molecular Function: riboflavin kinase activity (GO:0008531);; Molecular Function: phosphoglycolate phosphatase activity (GO:0008967);; Biological Process: riboflavin biosynthetic process (GO:0009231);; Biological Process: cellular response to phosphate starvation (GO:0016036);; Biological Process: phosphorylation (GO:0016310);; B…	K00861|4e-94|vvi:100258142|hypothetical protein LOC100258142	Riboflavin kinase OS=Homo sapiens GN=RFK PE=1 SV=2	hypothetical protein M569_15906, partial [Genlisea aurea]
comp28008_c0	[S]	Function unknown	--	--	Putative disease resistance RPP13-like protein 2 OS=Arabidopsis thaliana GN=RPP13L2 PE=3 SV=1	Disease resistance protein RPH8A, putative [Theobroma cacao]
comp1340_c0	--	--	--	--	Glycine-rich cell wall structural protein OS=Hordeum vulgare GN=GRP PE=2 SV=1	hypothetical protein ZEAMMB73_915276, partial [Zea mays]
comp22510_c0	--	--	Molecular Function: binding (GO:0005488);; Molecular Function: transferase activity, transferring phosphorus-containing groups (GO:0016772);;	--	--	conserved hypothetical protein [Ricinus communis]
comp7025_c0	--	--	Cellular Component: plasma membrane (GO:0005886);; Biological Process: response to temperature stimulus (GO:0009266);; Biological Process: response to humidity (GO:0009270);; Biological Process: positive regulation of cell size (GO:0045793);; Biological Process: negative regulation of cell death (GO:0060548);;	--	Protein BONZAI 1 OS=Arabidopsis thaliana GN=BON1 PE=1 SV=2	PREDICTED: protein BONZAI 1 [Vitis vinifera]
comp7155_c0	--	--	Biological Process: cellular response to phosphate starvation (GO:0016036);; Biological Process: cellular response to cold (GO:0070417);;	--	SPX domain-containing protein 3 OS=Oryza sativa subsp. japonica GN=SPX3 PE=2 SV=1	PREDICTED: SPX domain-containing protein 3-like [Fragaria vesca subsp. vesca]
comp6387_c0	--	--	--	--	Protein LHY OS=Arabidopsis thaliana GN=LHY PE=1 SV=2	PREDICTED: protein LHY-like [Vitis vinifera]
comp7505_c0	--	--	Molecular Function: core promoter proximal region sequence-specific DNA binding (GO:0000987);; Molecular Function: sequence-specific DNA binding transcription factor activity (GO:0003700);; Cellular Component: nucleus (GO:0005634);; Biological Process: regulation of transcription, DNA-templated (GO:0006355);; Biological Process: N-terminal protein myristoylation (GO:0006499);; Biological Process:…	--	JmjC domain-containing protein 4 OS=Danio rerio GN=jmjd4 PE=2 SV=1	hypothetical protein OsJ_02162 [Oryza sativa Japonica Group]
comp27148_c0	--	--	Cellular Component: mitochondrion (GO:0005739);; Cellular Component: membrane (GO:0016020);;	--	Pentatricopeptide repeat-containing protein At3g14580, mitochondrial OS=Arabidopsis thaliana GN=At3g14580 PE=2 SV=1	PH01B019A14.7 [Phyllostachys edulis]
comp12034_c0	[J]	Translation, ribosomal structure and biogenesis	Molecular Function: translation initiation factor activity (GO:0003743);; Molecular Function: guanyl-nucleotide exchange factor activity (GO:0005085);; Molecular Function: GTP binding (GO:0005525);; Cellular Component: eukaryotic translation initiation factor 2B complex (GO:0005851);; Biological Process: regulation of translational initiation (GO:0006446);; Cellular Component: chloroplast (GO:000…	K03239|9e-67|osa:4352258|Os12g0497400	Translation initiation factor eIF-2B subunit alpha OS=Bos taurus GN=EIF2B1 PE=2 SV=1	hypothetical protein VITISV_043716 [Vitis vinifera]
comp8554_c0	--	--	Molecular Function: protein dimerization activity (GO:0046983);;	--	Transcription factor bHLH68 OS=Arabidopsis thaliana GN=BHLH68 PE=2 SV=2	PREDICTED: transcription factor bHLH68 [Vitis vinifera]
comp820_c0	[E]	Amino acid transport and metabolism	Molecular Function: glutamate decarboxylase activity (GO:0004351);; Molecular Function: calmodulin binding (GO:0005516);; Biological Process: glutamate metabolic process (GO:0006536);; Cellular Component: plasmodesma (GO:0009506);; Molecular Function: pyridoxal phosphate binding (GO:0030170);;	K01580|1e-130|vvi:100266215|hypothetical protein LOC100266215	Glutamate decarboxylase 5 OS=Arabidopsis thaliana GN=GAD5 PE=2 SV=1	PREDICTED: glutamate decarboxylase-like [Fragaria vesca subsp. vesca]
comp30270_c0	--	--	Molecular Function: protein kinase activity (GO:0004672);; Molecular Function: binding (GO:0005488);; Biological Process: cellular process (GO:0009987);;	--	G-type lectin S-receptor-like serine/threonine-protein kinase At5g24080 OS=Arabidopsis thaliana GN=At5g24080 PE=2 SV=1	PREDICTED: G-type lectin S-receptor-like serine/threonine-protein kinase At5g24080-like [Fragaria vesca subsp. vesca]
comp7102_c0	--	--	--	--	Uncharacterized proline-rich protein (Fragment) OS=Owenia fusiformis PE=4 SV=1	hypothetical protein PRUPE_ppa003035mg [Prunus persica]
comp9941_c0	--	--	Molecular Function: actin binding (GO:0003779);; Cellular Component: cell wall (GO:0005618);; Cellular Component: nucleolus (GO:0005730);; Cellular Component: spindle (GO:0005819);; Cellular Component: plasma membrane (GO:0005886);; Cellular Component: phragmoplast (GO:0009524);; Cellular Component: integral component of membrane (GO:0016021);; Cellular Component: cytoplasmic membrane-bounded ves…	--	Formin-like protein 8 OS=Oryza sativa subsp. japonica GN=FH8 PE=2 SV=1	Formin [Theobroma cacao]
comp13102_c0	[S]	Function unknown	--	--	Disease resistance protein At4g27190 OS=Arabidopsis thaliana GN=At4g27190 PE=2 SV=1	LRR and NB-ARC domains-containing disease resistance protein, putative [Theobroma cacao]
comp34374_c0	[C]	Energy production and conversion	Cellular Component: Golgi apparatus (GO:0005794);; Molecular Function: electron carrier activity (GO:0009055);; Biological Process: toxin catabolic process (GO:0009407);; Biological Process: response to chitin (GO:0010200);; Biological Process: response to cyclopentenone (GO:0010583);; Molecular Function: oxidoreductase activity (GO:0016491);; Biological Process: hydrogen peroxide catabolic proce…	--	Apoptosis-inducing factor homolog B OS=Dictyostelium discoideum GN=aifB PE=3 SV=1	PREDICTED: apoptosis-inducing factor homolog A-like [Glycine max]
comp19768_c0	--	--	--	--	Uncharacterized serine-rich protein C1E8.05 OS=Schizosaccharomyces pombe (strain 972 / ATCC 24843) GN=SPBC1E8.05 PE=2 SV=1	--
comp43385_c0	--	--	--	--	Putative defensin-like protein 270 OS=Arabidopsis thaliana GN=At5g51845 PE=3 SV=1	unnamed protein product [Vitis vinifera]
comp8405_c0	[R]	General function prediction only	Molecular Function: protein binding (GO:0005515);; Cellular Component: chloroplast (GO:0009507);; Biological Process: embryo development ending in seed dormancy (GO:0009793);;	--	Ankyrin repeat domain-containing protein, chloroplastic OS=Arabidopsis thaliana GN=AKRP PE=1 SV=2	PREDICTED: ankyrin repeat domain-containing protein, chloroplastic isoform 1 [Vitis vinifera]
comp13269_c0	--	--	Molecular Function: inorganic diphosphatase activity (GO:0004427);; Biological Process: cellular response to phosphate starvation (GO:0016036);; Biological Process: dephosphorylation (GO:0016311);; Biological Process: protein tetramerization (GO:0051262);; Molecular Function: phosphocholine phosphatase activity (GO:0052731);; Molecular Function: phosphoethanolamine phosphatase activity (GO:005273…	--	Inorganic pyrophosphatase 2 OS=Arabidopsis thaliana GN=At1g17710 PE=2 SV=1	Pyridoxal phosphate phosphatase-related protein [Theobroma cacao]
comp25366_c0	[R]	General function prediction only	Molecular Function: acid phosphatase activity (GO:0003993);; Molecular Function: protein serine/threonine phosphatase activity (GO:0004722);; Cellular Component: extracellular region (GO:0005576);; Cellular Component: cytoplasmic membrane-bounded vesicle (GO:0016023);; Biological Process: cellular response to phosphate starvation (GO:0016036);; Biological Process: galactolipid biosynthetic proces…	--	Purple acid phosphatase 22 OS=Arabidopsis thaliana GN=PAP22 PE=2 SV=1	PREDICTED: purple acid phosphatase 22-like [Fragaria vesca subsp. vesca]
comp24280_c0	--	--	--	--	--	putative polyprotein [Cicer arietinum]
comp14942_c0	--	--	Cellular Component: nucleus (GO:0005634);;	--	Protein ARABIDILLO 2 OS=Arabidopsis thaliana GN=At3g60350 PE=2 SV=1	ubiquitin-protein ligase, putative [Ricinus communis]
comp14109_c0	--	--	Cellular Component: integral component of membrane (GO:0016021);;	--	Transmembrane protein 136 OS=Homo sapiens GN=TMEM136 PE=2 SV=2	hypothetical protein PRUPE_ppa019781mg [Prunus persica]
comp10704_c0	--	--	Biological Process: apoptotic process (GO:0006915);; Cellular Component: intracellular part (GO:0044424);;	--	BTB/POZ domain-containing protein At3g19850 OS=Arabidopsis thaliana GN=At3g19850 PE=2 SV=1	PREDICTED: BTB/POZ domain-containing protein At3g19850 [Vitis vinifera]
comp10552_c0	[L]	Replication, recombination and repair	Molecular Function: catalytic activity (GO:0003824);; Cellular Component: plastid (GO:0009536);;	--	5&apos;-3&apos; exonuclease OS=Aquifex aeolicus (strain VF5) GN=aq_1628 PE=3 SV=1	PREDICTED: 5&apos;-3&apos; exonuclease-like [Vitis vinifera]
comp8877_c1	--	--	Cellular Component: endoplasmic reticulum (GO:0005783);; Cellular Component: integral component of membrane (GO:0016021);; Cellular Component: cytoplasmic membrane-bounded vesicle (GO:0016023);; Biological Process: primary metabolic process (GO:0044238);; Biological Process: organic substance metabolic process (GO:0071704);;	K05292|0.0|vvi:100257996|hypothetical protein LOC100257996	GPI transamidase component PIG-T OS=Mus musculus GN=Pigt PE=1 SV=2	PREDICTED: GPI transamidase component PIG-T-like isoform 2 [Vitis vinifera]
comp17823_c0	--	--	Molecular Function: protein binding (GO:0005515);; Cellular Component: vacuole (GO:0005773);; Cellular Component: plasma membrane (GO:0005886);; Biological Process: N-terminal protein myristoylation (GO:0006499);; Cellular Component: plasmodesma (GO:0009506);; Biological Process: response to abscisic acid (GO:0009737);; Biological Process: brassinosteroid mediated signaling pathway (GO:0009742);;…	--	Probable serine/threonine-protein kinase At4g35230 OS=Arabidopsis thaliana GN=At4g35230 PE=1 SV=1	BR-signaling kinase 1 isoform 2 [Theobroma cacao]
comp15840_c0	--	--	Cellular Component: mitochondrion (GO:0005739);;	--	Pentatricopeptide repeat-containing protein At1g52620 OS=Arabidopsis thaliana GN=At1g52620 PE=2 SV=1	PREDICTED: pentatricopeptide repeat-containing protein At1g52620-like [Vitis vinifera]
comp40035_c0	--	--	Biological Process: MAPK cascade (GO:0000165);; Molecular Function: protein serine/threonine kinase activity (GO:0004674);; Molecular Function: ATP binding (GO:0005524);; Cellular Component: plasma membrane (GO:0005886);; Biological Process: protein phosphorylation (GO:0006468);; Biological Process: transmembrane receptor protein tyrosine kinase signaling pathway (GO:0007169);; Biological Process…	--	LRR receptor-like serine/threonine-protein kinase HSL2 OS=Arabidopsis thaliana GN=HSL2 PE=2 SV=1	PREDICTED: LRR receptor-like serine/threonine-protein kinase HSL2-like [Vitis vinifera]
comp6543_c0	[L]	Replication, recombination and repair	Molecular Function: DNA binding (GO:0003677);; Molecular Function: glycylpeptide N-tetradecanoyltransferase activity (GO:0004379);; Cellular Component: nucleus (GO:0005634);; Biological Process: DNA methylation (GO:0006306);; Molecular Function: methyltransferase activity (GO:0008168);;	K00558|2e-85|sbi:SORBI_03g027700|hypothetical protein	DNA (cytosine-5)-methyltransferase OS=Dictyostelium discoideum GN=dnmA PE=1 SV=1	unnamed protein product [Vitis vinifera]
comp34594_c0	--	--	--	--	--	putative reverse transcriptase family member [Malus domestica]
comp16044_c0	--	--	Cellular Component: nucleus (GO:0005634);; Biological Process: protein N-linked glycosylation (GO:0006487);; Biological Process: hormone-mediated signaling pathway (GO:0009755);; Biological Process: sugar mediated signaling pathway (GO:0010182);; Biological Process: regulation of ethylene biosynthetic process (GO:0010364);; Biological Process: cellular response to phosphate starvation (GO:0016036…	--	Ethylene-overproduction protein 1 OS=Arabidopsis thaliana GN=ETO1 PE=1 SV=2	hypothetical protein RCOM_0847310 [Ricinus communis]
comp9872_c0	[OC]	--	Biological Process: glycerol ether metabolic process (GO:0006662);; Molecular Function: electron carrier activity (GO:0009055);; Cellular Component: chloroplast stroma (GO:0009570);; Molecular Function: protein disulfide oxidoreductase activity (GO:0015035);; Molecular Function: oxidoreductase activity, acting on a sulfur group of donors, disulfide as acceptor (GO:0016671);; Cellular Component: c…	--	Thioredoxin-like 2, chloroplastic OS=Oryza sativa subsp. japonica GN=Os05g0200100 PE=2 SV=1	PREDICTED: thioredoxin-like 2, chloroplastic [Vitis vinifera]
comp17061_c0	--	--	Biological Process: MAPK cascade (GO:0000165);; Biological Process: response to hypoxia (GO:0001666);; Biological Process: protein targeting to membrane (GO:0006612);; Biological Process: response to cold (GO:0009409);; Biological Process: salicylic acid biosynthetic process (GO:0009697);; Cellular Component: chloroplast outer membrane (GO:0009707);; Biological Process: abscisic acid-activated si…	K09480|3e-79|vvi:100251641|hypothetical protein LOC100251641	Digalactosyldiacylglycerol synthase 2, chloroplastic OS=Lotus japonicus GN=DGD2 PE=2 SV=1	PREDICTED: digalactosyldiacylglycerol synthase 2, chloroplastic [Vitis vinifera]
comp13473_c0	--	--	Molecular Function: calmodulin binding (GO:0005516);; Cellular Component: nucleus (GO:0005634);; Biological Process: response to auxin (GO:0009733);; Biological Process: single-organism cellular process (GO:0044763);;	K14488|8e-60|rcu:RCOM_0709300|Indole-3-acetic acid-induced protein ARG7, putative	Auxin-induced protein X15 OS=Glycine max PE=2 SV=1	Indole-3-acetic acid-induced protein ARG7, putative [Ricinus communis]
comp11767_c0	[Z]	Cytoskeleton	Molecular Function: structural constituent of cytoskeleton (GO:0005200);; Cellular Component: nucleoplasm (GO:0005654);; Cellular Component: cytoplasm (GO:0005737);; Biological Process: DNA repair (GO:0006281);; Biological Process: regulation of transcription, DNA-templated (GO:0006355);; Biological Process: embryo sac egg cell differentiation (GO:0009560);; Biological Process: actin filament-bas…	K11672|0.0|vvi:100258127|hypothetical protein LOC100258127	Actin-related protein 5 OS=Arabidopsis thaliana GN=ARP5 PE=1 SV=2	Actin-related protein 5 [Theobroma cacao]
comp16595_c0	[J]	Translation, ribosomal structure and biogenesis	Molecular Function: monooxygenase activity (GO:0004497);; Molecular Function: binding (GO:0005488);; Molecular Function: oxidoreductase activity, acting on paired donors, with incorporation or reduction of molecular oxygen (GO:0016705);;	--	Cytochrome P450 71A1 OS=Persea americana GN=CYP71A1 PE=1 SV=2	cytochrome P450 71 family protein [Solanum lycopersicum]
comp12915_c0	--	--	Biological Process: response to stress (GO:0006950);; Biological Process: response to abiotic stimulus (GO:0009628);;	--	--	conserved hypothetical protein [Ricinus communis]
comp4860_c0	--	--	--	--	WPP domain-associated protein (Fragment) OS=Solanum lycopersicum GN=WAP PE=1 SV=1	PREDICTED: WPP domain-associated protein-like [Vitis vinifera]
comp3972_c0	--	--	--	--	Vegetative cell wall protein gp1 OS=Chlamydomonas reinhardtii GN=GP1 PE=2 SV=1	PREDICTED: uncharacterized protein LOC100854548 [Vitis vinifera]
comp10039_c0	--	--	Biological Process: cell cycle checkpoint (GO:0000075);; Biological Process: DNA repair (GO:0006281);;	--	Cell cycle checkpoint control protein RAD9A OS=Homo sapiens GN=RAD9A PE=1 SV=1	PREDICTED: cell cycle checkpoint control protein RAD9A [Vitis vinifera]
comp26507_c0	[RTKL]	--	Molecular Function: protein serine/threonine kinase activity (GO:0004674);; Molecular Function: ATP binding (GO:0005524);; Biological Process: protein phosphorylation (GO:0006468);;	--	G-type lectin S-receptor-like serine/threonine-protein kinase At1g11330 OS=Arabidopsis thaliana GN=At1g11330 PE=1 SV=3	unnamed protein product [Vitis vinifera]
comp9170_c0	[RTKL]	--	Molecular Function: calmodulin-dependent protein kinase activity (GO:0004683);; Molecular Function: protein tyrosine kinase activity (GO:0004713);; Molecular Function: ATP binding (GO:0005524);; Cellular Component: plasma membrane (GO:0005886);; Biological Process: protein phosphorylation (GO:0006468);; Biological Process: signal transduction (GO:0007165);; Cellular Component: plastid (GO:0009536…	--	CBL-interacting protein kinase 1 OS=Oryza sativa subsp. japonica GN=CIPK1 PE=2 SV=1	hypothetical protein PRUPE_ppa005480mg [Prunus persica]
comp7276_c0	[I]	Lipid transport and metabolism	Biological Process: long-chain fatty acid metabolic process (GO:0001676);; Molecular Function: acyl-CoA dehydrogenase activity (GO:0003995);; Molecular Function: acyl-CoA oxidase activity (GO:0003997);; Cellular Component: nucleus (GO:0005634);; Cellular Component: peroxisome (GO:0005777);; Biological Process: fatty acid beta-oxidation (GO:0006635);; Biological Process: response to cytokinin (GO:…	K00232|0.0|pop:POPTR_832274|acyl-CoA oxidase (EC:1.3.3.6)	Acyl-coenzyme A oxidase 2, peroxisomal OS=Arabidopsis thaliana GN=ACX2 PE=1 SV=2	hypothetical protein CARUB_v10025999mg [Capsella rubella]
comp14530_c0	[E]	Amino acid transport and metabolism	Molecular Function: polygalacturonase activity (GO:0004650);; Cellular Component: extracellular region (GO:0005576);; Biological Process: carbohydrate metabolic process (GO:0005975);; Molecular Function: galacturan 1,4-alpha-galacturonidase activity (GO:0047911);;	--	Polygalacturonase At1g48100 OS=Arabidopsis thaliana GN=At1g48100 PE=2 SV=1	polygalacturonase 4 [Oncidium hybrid cultivar]
comp8301_c0	--	--	Cellular Component: nucleus (GO:0005634);; Cellular Component: endosome (GO:0005768);; Cellular Component: Golgi apparatus (GO:0005794);; Cellular Component: trans-Golgi network (GO:0005802);; Molecular Function: transferase activity, transferring glycosyl groups (GO:0016757);;	--	--	UDP-Glycosyltransferase superfamily protein isoform 1 [Theobroma cacao]
comp45151_c0	--	--	Molecular Function: transferase activity, transferring glycosyl groups (GO:0016757);;	--	Translation initiation factor IF-2 OS=Rhodococcus opacus (strain B4) GN=infB PE=3 SV=1	PREDICTED: uncharacterized protein LOC100825173 [Brachypodium distachyon]
comp32880_c0	--	--	Molecular Function: catalytic activity (GO:0003824);; Biological Process: metabolic process (GO:0008152);; Molecular Function: organic cyclic compound binding (GO:0097159);; Molecular Function: heterocyclic compound binding (GO:1901363);;	--	--	hypothetical protein PRUPE_ppa022276mg, partial [Prunus persica]
comp15310_c0	[G]	Carbohydrate transport and metabolism	Molecular Function: beta-galactosidase activity (GO:0004565);; Cellular Component: cell wall (GO:0005618);; Biological Process: carbohydrate metabolic process (GO:0005975);; Biological Process: plant-type cell wall modification (GO:0009827);; Molecular Function: carbohydrate binding (GO:0030246);; Molecular Function: cation binding (GO:0043169);; Cellular Component: apoplast (GO:0048046);; Biolog…	--	Beta-galactosidase 6 OS=Arabidopsis thaliana GN=BGAL6 PE=2 SV=1	PREDICTED: LOW QUALITY PROTEIN: beta-galactosidase 6-like, partial [Fragaria vesca subsp. vesca]
comp5320_c0	[A]	RNA processing and modification	Biological Process: mRNA splicing, via spliceosome (GO:0000398);; Molecular Function: RNA binding (GO:0003723);; Cellular Component: U2-type spliceosomal complex (GO:0005684);; Biological Process: ribonucleoprotein complex assembly (GO:0022618);; Molecular Function: metal ion binding (GO:0046872);;	K11095|3e-77|rcu:RCOM_0556840|U1 small nuclear ribonucleoprotein C, putative	U1 small nuclear ribonucleoprotein C OS=Vitis vinifera GN=VIT_07s0104g01170 PE=3 SV=1	C2H2 and C2HC zinc fingers superfamily protein isoform 1 [Theobroma cacao]
comp2003_c0	[O]	Posttranslational modification, protein turnover, chaperones	Molecular Function: protein binding (GO:0005515);; Cellular Component: nucleus (GO:0005634);; Cellular Component: plasma membrane (GO:0005886);; Biological Process: protein folding (GO:0006457);;	K09518|1e-150|vvi:100262992|hypothetical protein LOC100262992	Chaperone protein dnaJ 49 OS=Arabidopsis thaliana GN=ATJ49 PE=2 SV=2	PREDICTED: chaperone protein dnaJ 49 isoform 1 [Vitis vinifera]
comp5738_c0	--	--	--	--	--	unnamed protein product [Vitis vinifera]
comp13873_c0	--	--	Molecular Function: nucleotide binding (GO:0000166);; Cellular Component: microtubule cytoskeleton (GO:0015630);; Cellular Component: protein complex (GO:0043234);; Cellular Component: cytoskeletal part (GO:0044430);; Biological Process: single-organism process (GO:0044699);;	--	Pentatricopeptide repeat-containing protein At2g13600 OS=Arabidopsis thaliana GN=PCMP-E76 PE=3 SV=1	PREDICTED: pentatricopeptide repeat-containing protein At2g13600-like [Vitis vinifera]
comp9698_c0	--	--	Cellular Component: nucleus (GO:0005634);;	--	DENN domain-containing protein 5B OS=Danio rerio GN=dennd5b PE=2 SV=2	DENN domain-containing protein isoform 1 [Theobroma cacao]
comp14371_c0	--	--	Molecular Function: phosphoprotein phosphatase activity (GO:0004721);; Cellular Component: nucleus (GO:0005634);; Biological Process: metabolic process (GO:0008152);;	--	Probable protein phosphatase 2C 66 OS=Oryza sativa subsp. japonica GN=Os08g0500300 PE=2 SV=1	protein phosphatase-2c, putative [Ricinus communis]
comp2840_c0	--	--	Cellular Component: vacuole (GO:0005773);;	--	CBS domain-containing protein CBSX6 OS=Arabidopsis thaliana GN=CBSX6 PE=1 SV=1	PREDICTED: CBS domain-containing protein CBSX6-like [Fragaria vesca subsp. vesca]
comp23758_c0	--	--	Cellular Component: mitochondrion (GO:0005739);; Cellular Component: chloroplast (GO:0009507);; Biological Process: chloroplast RNA processing (GO:0031425);;	--	Putative pentatricopeptide repeat-containing protein At5g59200, chloroplastic OS=Arabidopsis thaliana GN=PCMP-E41 PE=3 SV=1	Tetratricopeptide repeat-like superfamily protein [Theobroma cacao]
comp13696_c0	[R]	General function prediction only	--	--	Uncharacterized WD repeat-containing protein alr2800 OS=Nostoc sp. (strain PCC 7120 / UTEX 2576) GN=alr2800 PE=4 SV=1	predicted protein [Hordeum vulgare subsp. vulgare]
comp2564_c0	--	--	Cellular Component: plastid (GO:0009536);;	--	Formin-like protein 16 OS=Oryza sativa subsp. japonica GN=FH16 PE=2 SV=1	unknown protein [Ophiopogon japonicus]
comp3642_c1	--	--	--	--	Serine/arginine repetitive matrix protein 1 OS=Homo sapiens GN=SRRM1 PE=1 SV=2	PREDICTED: uncharacterized protein LOC100246362 [Vitis vinifera]
comp38711_c0	--	--	Cellular Component: mitochondrion (GO:0005739);; Molecular Function: hydrolase activity (GO:0016787);;	--	Protein ASPARTIC PROTEASE IN GUARD CELL 2 OS=Arabidopsis thaliana GN=ASPG2 PE=2 SV=1	Aspartic proteinase nepenthesin-2 precursor, putative [Ricinus communis]
comp11606_c0	--	--	--	--	--	PREDICTED: uncharacterized protein LOC101243908 [Solanum lycopersicum]
comp29832_c0	--	--	--	--	--	hypothetical protein VITISV_000218 [Vitis vinifera]
comp18779_c0	--	--	Cellular Component: vacuole (GO:0005773);; Cellular Component: chloroplast (GO:0009507);; Cellular Component: integral component of membrane (GO:0016021);; Cellular Component: cytoplasmic membrane-bounded vesicle (GO:0016023);; Molecular Function: oxidoreductase activity (GO:0016491);; Biological Process: electron transport chain (GO:0022900);; Molecular Function: metal ion binding (GO:0046872);;	K08360|6e-10|osa:4336503|Os04g0533500	Probable ascorbate-specific transmembrane electron transporter 1 OS=Oryza sativa subsp. japonica GN=Os02g0642300 PE=2 SV=1	RecName: Full=Probable ascorbate-specific transmembrane electron transporter 1; AltName: Full=Cytochrome b561-1
comp18036_c0	[O]	Posttranslational modification, protein turnover, chaperones	Molecular Function: 1-phosphatidylinositol-3-phosphate 5-kinase activity (GO:0000285);; Molecular Function: ATP binding (GO:0005524);; Cellular Component: endosome (GO:0005768);; Biological Process: vacuole organization (GO:0007033);; Molecular Function: zinc ion binding (GO:0008270);; Biological Process: pollen development (GO:0009555);; Biological Process: organ morphogenesis (GO:0009887);; Bio…	K00921|5e-62|rcu:RCOM_0708740|fyve finger-containing phosphoinositide kinase, fyv1, putative (EC:2.7.1.150)	1-phosphatidylinositol-3-phosphate 5-kinase FAB1A OS=Arabidopsis thaliana GN=FAB1A PE=2 SV=1	fyve finger-containing phosphoinositide kinase, fyv1, putative [Ricinus communis]
comp3766_c0	--	--	Cellular Component: Golgi membrane (GO:0000139);; Biological Process: nuclear-transcribed mRNA catabolic process (GO:0000956);; Cellular Component: mitochondrion (GO:0005739);; Cellular Component: Golgi stack (GO:0005795);; Cellular Component: cytosol (GO:0005829);; Biological Process: protein glycosylation (GO:0006486);; Biological Process: vacuole organization (GO:0007033);; Molecular Function:…	--	Golgin candidate 6 OS=Arabidopsis thaliana GN=GC6 PE=1 SV=2	unnamed protein product [Vitis vinifera]
comp4154_c0	--	--	Cellular Component: Golgi apparatus (GO:0005794);; Molecular Function: methyltransferase activity (GO:0008168);; Biological Process: methylation (GO:0032259);;	--	Probable methyltransferase PMT7 OS=Arabidopsis thaliana GN=At5g04060 PE=1 SV=1	ATP binding protein, putative [Ricinus communis]
comp1475_c0	[O]	Posttranslational modification, protein turnover, chaperones	Biological Process: RNA splicing, via endonucleolytic cleavage and ligation (GO:0000394);; Molecular Function: protein binding (GO:0005515);; Cellular Component: nucleus (GO:0005634);; Cellular Component: cytoplasm (GO:0005737);; Biological Process: gluconeogenesis (GO:0006094);; Biological Process: cytoskeleton organization (GO:0007010);; Biological Process: methionine biosynthetic process (GO:0…	K12160|2e-42|rcu:RCOM_0753100|hypothetical protein	Small ubiquitin-related modifier 2 OS=Arabidopsis thaliana GN=SUMO2 PE=1 SV=1	hypothetical protein CARUB_v10027422mg [Capsella rubella]
comp37326_c0	--	--	Molecular Function: catalytic activity (GO:0003824);;	--	--	hypothetical protein VITISV_020427 [Vitis vinifera]
comp26057_c0	--	--	--	--	--	hypothetical protein PRUPE_ppa019476mg [Prunus persica]
comp33935_c0	--	--	--	--	Putative pentatricopeptide repeat-containing protein At5g37570 OS=Arabidopsis thaliana GN=PCMP-E37 PE=3 SV=1	Pentatricopeptide repeat superfamily protein, putative [Theobroma cacao]
comp28864_c0	--	--	--	--	--	predicted protein [Micromonas pusilla CCMP1545]
comp15958_c0	--	--	Cellular Component: mitochondrion (GO:0005739);;	--	Pentatricopeptide repeat-containing protein At2g27800, mitochondrial OS=Arabidopsis thaliana GN=At2g27800 PE=2 SV=2	PREDICTED: pentatricopeptide repeat-containing protein At2g27800, mitochondrial-like [Fragaria vesca subsp. vesca]
comp11837_c0	--	--	Molecular Function: hydrolase activity (GO:0016787);;	--	Glucan endo-1,3-beta-glucosidase 13 OS=Arabidopsis thaliana GN=At5g56590 PE=1 SV=1	unknown [Zea mays]
comp18302_c0	--	--	Molecular Function: binding (GO:0005488);; Cellular Component: cytoplasmic membrane-bounded vesicle (GO:0016023);; Molecular Function: kinase activity (GO:0016301);; Biological Process: phosphorylation (GO:0016310);; Biological Process: reproductive process (GO:0022414);; Biological Process: single-multicellular organism process (GO:0044707);;	--	Receptor-like serine/threonine-protein kinase SD1-8 OS=Arabidopsis thaliana GN=SD18 PE=1 SV=1	S-locus-specific glycoprotein S6 [Aegilops tauschii]
comp40493_c0	--	--	Biological Process: mitochondrial mRNA modification (GO:0080156);;	--	Pentatricopeptide repeat-containing protein At3g18970 OS=Arabidopsis thaliana GN=PCMP-E93 PE=2 SV=1	Mitochondrial editing factor 20 [Theobroma cacao]
comp18733_c0	[BD]	--	Cellular Component: condensin complex (GO:0000796);; Cellular Component: nucleus (GO:0005634);; Biological Process: mitotic chromosome condensation (GO:0007076);; Biological Process: response to heat (GO:0009408);; Cellular Component: plasmodesma (GO:0009506);; Biological Process: embryo development ending in seed dormancy (GO:0009793);;	K06678|0.0|vvi:100242435|hypothetical protein LOC100242435	Condensin complex subunit 3 OS=Homo sapiens GN=NCAPG PE=1 SV=1	PREDICTED: condensin complex subunit 3-like [Setaria italica]
comp2221_c0	--	--	--	--	Sulfated surface glycoprotein 185 OS=Volvox carteri PE=1 SV=1	uncharacterized protein LOC100277064 [Zea mays]
comp23827_c0	--	--	Molecular Function: nucleic acid binding (GO:0003676);; Cellular Component: plastid (GO:0009536);;	--	Putative AC transposase OS=Zea mays PE=2 SV=2	hypothetical protein SORBIDRAFT_04g019795 [Sorghum bicolor]
comp2409_c0	--	--	Molecular Function: calcium ion binding (GO:0005509);; Cellular Component: endoplasmic reticulum lumen (GO:0005788);; Biological Process: protein folding (GO:0006457);; Molecular Function: unfolded protein binding (GO:0051082);;	K08057|1e-147|vvi:100256319|hypothetical protein LOC100256319	Calreticulin OS=Ricinus communis PE=2 SV=1	PREDICTED: calreticulin [Vitis vinifera]
comp31564_c0	--	--	Molecular Function: DNA binding (GO:0003677);; Molecular Function: sequence-specific DNA binding transcription factor activity (GO:0003700);; Cellular Component: nucleus (GO:0005634);; Biological Process: regulation of transcription, DNA-templated (GO:0006355);; Biological Process: multicellular organismal development (GO:0007275);; Biological Process: xylem development (GO:0010089);; Biological …	--	NAC domain-containing protein 100 OS=Arabidopsis thaliana GN=NAC100 PE=2 SV=1	unnamed protein product [Vitis vinifera]
comp27404_c0	--	--	Molecular Function: catalytic activity (GO:0003824);;	--	Protein phosphatase 2C 29 OS=Arabidopsis thaliana GN=PLL1 PE=1 SV=2	unnamed protein product [Vitis vinifera]
comp4219_c0	--	--	Cellular Component: chloroplast (GO:0009507);;	--	--	PREDICTED: uncharacterized protein LOC100261066 isoform 1 [Vitis vinifera]
comp9878_c0	--	--	Molecular Function: nucleic acid binding (GO:0003676);; Molecular Function: exonuclease activity (GO:0004527);; Cellular Component: mitochondrion (GO:0005739);; Biological Process: pyrimidine ribonucleotide biosynthetic process (GO:0009220);;	--	Uncharacterized exonuclease domain-containing protein At3g15140 OS=Arabidopsis thaliana GN=At3g15140 PE=2 SV=1	PREDICTED: uncharacterized exonuclease domain-containing protein At3g15140 [Vitis vinifera]
comp33445_c0	[M]	Cell wall/membrane/envelope biogenesis	Biological Process: response to hypoxia (GO:0001666);; Cellular Component: nucleus (GO:0005634);; Biological Process: sucrose metabolic process (GO:0005985);; Biological Process: galactolipid biosynthetic process (GO:0019375);; Molecular Function: sucrose-phosphate synthase activity (GO:0046524);;	K00696|5e-85|pop:POPTR_797985|hypothetical protein	Probable sucrose-phosphate synthase 3 OS=Arabidopsis thaliana GN=SPS3 PE=2 SV=1	sucrose phosphate synthase [Coffea canephora]
comp9601_c0	[I]	Lipid transport and metabolism	Biological Process: sulfur amino acid metabolic process (GO:0000096);; Biological Process: glycine catabolic process (GO:0006546);; Biological Process: unsaturated fatty acid biosynthetic process (GO:0006636);; Biological Process: phosphatidylglycerol biosynthetic process (GO:0006655);; Biological Process: oxidoreduction coenzyme metabolic process (GO:0006733);; Biological Process: vitamin metabo…	K10255|0.0|pop:POPTR_802185|omega-6 fatty acid desaturase	Omega-6 fatty acid desaturase, chloroplastic OS=Brassica napus PE=2 SV=1	PREDICTED: omega-6 fatty acid desaturase, chloroplastic-like [Vitis vinifera]
comp814_c0	[OU]	--	Cellular Component: mitochondrion (GO:0005739);; Molecular Function: peptidase activity (GO:0008233);; Cellular Component: chloroplast stroma (GO:0009570);; Cellular Component: thylakoid (GO:0009579);; Cellular Component: chloroplast envelope (GO:0009941);; Biological Process: isopentenyl diphosphate biosynthetic process, methylerythritol 4-phosphate pathway (GO:0019288);;	--	ATP-dependent Clp protease proteolytic subunit-related protein 3, chloroplastic OS=Arabidopsis thaliana GN=CLPR3 PE=1 SV=1	ATP-dependent caseinolytic (Clp) protease/crotonase family protein isoform 1 [Theobroma cacao]
comp10144_c0	--	--	Molecular Function: protein kinase activity (GO:0004672);;	--	Leucine-rich repeat protein lrrA OS=Dictyostelium discoideum GN=lrrA PE=1 SV=1	PREDICTED: uncharacterized protein LOC100249467 [Vitis vinifera]
comp29234_c0	--	--	Molecular Function: DNA binding (GO:0003677);; Cellular Component: mitochondrion (GO:0005739);; Biological Process: RNA modification (GO:0009451);; Cellular Component: plastid (GO:0009536);;	--	Putative pentatricopeptide repeat-containing protein At5g09950 OS=Arabidopsis thaliana GN=PCMP-H35 PE=3 SV=1	predicted protein [Populus trichocarpa]
comp16110_c0	--	--	Cellular Component: membrane (GO:0016020);; Cellular Component: cytoplasmic membrane-bounded vesicle (GO:0016023);;	--	--	Uncharacterized protein TCM_019970 [Theobroma cacao]
comp3045_c0	[O]	Posttranslational modification, protein turnover, chaperones	Molecular Function: ubiquitin-protein ligase activity (GO:0004842);; Molecular Function: protein binding (GO:0005515);; Cellular Component: plasma membrane (GO:0005886);; Molecular Function: zinc ion binding (GO:0008270);; Biological Process: positive regulation of plant-type hypersensitive response (GO:0034052);;	--	E3 ubiquitin protein ligase RIN2 OS=Arabidopsis thaliana GN=RIN2 PE=1 SV=1	PREDICTED: E3 ubiquitin protein ligase RIN2 [Vitis vinifera]
comp7327_c0	--	--	--	--	Palmitoyltransferase ZDHHC18 OS=Rattus norvegicus GN=Zdhhc18 PE=2 SV=1	fibrocystin-L-like protein [Chlamydomonas reinhardtii]
comp3797_c0	[K]	Transcription	Biological Process: transcription initiation from RNA polymerase II promoter (GO:0006367);; Molecular Function: sequence-specific DNA binding (GO:0043565);;	K03136|0.0|osa:4345330|Os08g0343300	Transcription initiation factor IIE subunit alpha OS=Saccharomyces cerevisiae (strain ATCC 204508 / S288c) GN=TFA1 PE=1 SV=1	PREDICTED: general transcription factor IIE subunit 1-like [Vitis vinifera]
comp3938_c0	--	--	Cellular Component: plastid (GO:0009536);;	--	Protein EFR3 homolog cmp44E OS=Drosophila melanogaster GN=stmA PE=2 SV=3	PREDICTED: uncharacterized protein LOC100264846 [Vitis vinifera]
comp2724_c0	[R]	General function prediction only	Molecular Function: nucleic acid binding (GO:0003676);; Molecular Function: ATP binding (GO:0005524);; Cellular Component: nucleus (GO:0005634);; Cellular Component: mitochondrion (GO:0005739);; Molecular Function: ATP-dependent helicase activity (GO:0008026);; Biological Process: gravitropism (GO:0009630);;	--	Activating signal cointegrator 1 complex subunit 3 OS=Bos taurus GN=ascc3 PE=2 SV=1	U5 small nuclear ribonucleoprotein helicase isoform 1 [Theobroma cacao]
comp45232_c0	--	--	Molecular Function: hydrolase activity (GO:0016787);;	--	--	PREDICTED: uncharacterized protein LOC100799415 [Glycine max]
comp19367_c0	[T]	Signal transduction mechanisms	Molecular Function: phosphorelay sensor kinase activity (GO:0000155);; Biological Process: phosphorelay signal transduction system (GO:0000160);; Molecular Function: ATP binding (GO:0005524);; Biological Process: regulation of transcription, DNA-templated (GO:0006355);; Biological Process: detection of visible light (GO:0009584);; Biological Process: red, far-red light phototransduction (GO:00095…	--	Phytochrome B1 OS=Solanum lycopersicum GN=PHYB1 PE=2 SV=1	phytochrome b [Helianthus annuus]
comp10381_c0	--	--	Cellular Component: mitochondrion (GO:0005739);; Cellular Component: chloroplast inner membrane (GO:0009706);;	--	--	PREDICTED: uncharacterized protein LOC101299328 [Fragaria vesca subsp. vesca]
comp15308_c0	--	--	Biological Process: regulation of transcription, DNA-templated (GO:0006355);; Biological Process: response to chemical (GO:0042221);; Biological Process: single-organism process (GO:0044699);;	K09286|4e-11|vvi:100264172|hypothetical protein LOC100264172	Ethylene-responsive transcription factor 3 OS=Nicotiana tabacum GN=ERF3 PE=2 SV=1	hypothetical protein EMIHUDRAFT_423239 [Emiliania huxleyi CCMP1516]
comp2466_c0	--	--	--	--	--	unnamed protein product [Vitis vinifera]
comp10727_c0	[RTKL]	--	Molecular Function: protein kinase activity (GO:0004672);; Molecular Function: ATP binding (GO:0005524);; Biological Process: protein phosphorylation (GO:0006468);; Biological Process: autophagy (GO:0006914);;	--	Probable receptor-like protein kinase At5g15080 OS=Arabidopsis thaliana GN=At5g15080 PE=1 SV=1	PREDICTED: probable receptor-like protein kinase At5g15080 [Vitis vinifera]
comp21565_c0	--	--	Molecular Function: single-stranded DNA endodeoxyribonuclease activity (GO:0000014);; Molecular Function: T/G mismatch-specific endonuclease activity (GO:0043765);;	--	Endonuclease 4 OS=Arabidopsis thaliana GN=ENDO4 PE=3 SV=1	Os01g0128200 [Oryza sativa Japonica Group]
comp25191_c0	--	--	--	--	Zinc finger protein CONSTANS-LIKE 5 OS=Arabidopsis thaliana GN=COL5 PE=2 SV=2	hypothetical protein OsJ_32452 [Oryza sativa Japonica Group]
comp14352_c0	--	--	Cellular Component: integral component of membrane (GO:0016021);;	--	Vacuolar amino acid transporter 1 OS=Saccharomyces cerevisiae (strain ATCC 204508 / S288c) GN=AVT1 PE=1 SV=1	OSIGBa0097P08.12 [Oryza sativa Indica Group]
comp1827_c0	--	--	Molecular Function: transporter activity (GO:0005215);; Cellular Component: intracellular (GO:0005622);; Cellular Component: plasma membrane (GO:0005886);; Biological Process: transport (GO:0006810);;	--	Sec14 cytosolic factor OS=Schizosaccharomyces pombe (strain 972 / ATCC 24843) GN=sec14 PE=4 SV=1	PREDICTED: uncharacterized protein LOC101312875 [Fragaria vesca subsp. vesca]
comp5169_c0	[S]	Function unknown	Cellular Component: GINS complex (GO:0000811);; Biological Process: DNA replication initiation (GO:0006270);; Biological Process: regulation of DNA replication (GO:0006275);; Cellular Component: plastid (GO:0009536);; Biological Process: regulation of cell cycle (GO:0051726);;	K10735|1e-111|vvi:100258508|hypothetical protein LOC100258508	DNA replication complex GINS protein SLD5 OS=Mus musculus GN=Gins4 PE=1 SV=1	PREDICTED: DNA replication complex GINS protein SLD5 [Vitis vinifera]
comp19735_c1	--	--	Cellular Component: membrane (GO:0016020);; Cellular Component: cytoplasmic membrane-bounded vesicle (GO:0016023);; Molecular Function: transferase activity (GO:0016740);;	--	Glycerol-3-phosphate 2-O-acyltransferase 4 OS=Arabidopsis thaliana GN=GPAT4 PE=1 SV=1	hypothetical protein [Oryza punctata]
comp5838_c0	--	--	Molecular Function: exonuclease activity (GO:0004527);; Cellular Component: nucleus (GO:0005634);; Cellular Component: cytosol (GO:0005829);; Cellular Component: plastid (GO:0009536);; Biological Process: embryo sac egg cell differentiation (GO:0009560);; Biological Process: photomorphogenesis (GO:0009640);; Biological Process: cullin deneddylation (GO:0010388);; Molecular Function: organic cycli…	K12591|0.0|vvi:100265580|hypothetical protein LOC100265580	Exosome component 10 OS=Mus musculus GN=Exosc10 PE=1 SV=2	PREDICTED: exosome component 10-like [Glycine max]
comp20691_c0	--	--	--	--	CYC02 protein OS=Catharanthus roseus GN=CYC02 PE=2 SV=1	RecName: Full=CYC02 protein
comp2894_c0	--	--	Molecular Function: ceramidase activity (GO:0017040);;	K12349|0.0|rcu:RCOM_0731110|ceramidase, putative	Neutral ceramidase OS=Oryza sativa subsp. japonica GN=Os01g0624000 PE=1 SV=1	Neutral/alkaline non-lysosomal ceramidase isoform 1 [Theobroma cacao]
comp2043_c0	--	--	Biological Process: cytoplasmic transport (GO:0016482);; Cellular Component: intracellular membrane-bounded organelle (GO:0043231);; Cellular Component: cytoplasmic part (GO:0044444);; Biological Process: single-organism transport (GO:0044765);;	--	F-box/kelch-repeat protein At1g74510 OS=Arabidopsis thaliana GN=At1g74510 PE=2 SV=1	unnamed protein product [Vitis vinifera]
comp809_c0	--	--	Biological Process: cell morphogenesis (GO:0000902);; Cellular Component: mitochondrion (GO:0005739);; Cellular Component: endoplasmic reticulum (GO:0005783);; Cellular Component: integral component of membrane (GO:0016021);; Biological Process: cell growth (GO:0016049);; Biological Process: Golgi vesicle transport (GO:0048193);;	--	ER membrane protein complex subunit 3 OS=Rattus norvegicus GN=Emc3 PE=2 SV=3	Protein pob, putative [Ricinus communis]
comp16298_c0	--	--	Cellular Component: condensin complex (GO:0000796);; Biological Process: cytokinesis (GO:0000910);; Cellular Component: nucleus (GO:0005634);; Biological Process: microtubule-based process (GO:0007017);; Biological Process: mitotic chromosome condensation (GO:0007076);; Biological Process: epidermal cell fate specification (GO:0009957);;	K06677|0.0|vvi:100250469|hypothetical protein LOC100250469	Condensin complex subunit 1 OS=Xenopus laevis GN=ncapd2 PE=1 SV=1	hypothetical protein PRUPE_ppa000276mg [Prunus persica]
comp461_c0	--	--	--	--	Aquaporin PIP-type OS=Atriplex canescens PE=2 SV=1	probable aquaporin [Picea mariana]
comp70_c2	[RTKL]	--	Biological Process: MAPK cascade (GO:0000165);; Molecular Function: MAP kinase activity (GO:0004707);; Molecular Function: protein tyrosine kinase activity (GO:0004713);; Molecular Function: ATP binding (GO:0005524);; Cellular Component: nucleus (GO:0005634);; Cellular Component: mitochondrion (GO:0005739);; Cellular Component: cytosol (GO:0005829);; Biological Process: abscisic acid-activated si…	--	Mitogen-activated protein kinase 9 OS=Arabidopsis thaliana GN=MPK9 PE=2 SV=2	PREDICTED: mitogen-activated protein kinase 9-like [Vitis vinifera]
comp3716_c0	[K]	Transcription	Biological Process: transcription, DNA-templated (GO:0006351);; Cellular Component: intracellular part (GO:0044424);; Molecular Function: metal ion binding (GO:0046872);;	K03124|1e-122|vvi:100248187|hypothetical protein LOC100248187	Transcription initiation factor IIB OS=Oryza sativa subsp. japonica GN=TFIIB PE=1 SV=1	PREDICTED: transcription initiation factor IIB [Vitis vinifera]
comp36127_c0	--	--	Molecular Function: catalytic activity (GO:0003824);;	--	--	hypothetical protein VITISV_010028 [Vitis vinifera]
comp12153_c0	--	--	--	--	NAC domain-containing protein 78 OS=Arabidopsis thaliana GN=NAC078 PE=2 SV=2	hypothetical protein SORBIDRAFT_07g023900 [Sorghum bicolor]
comp6137_c0	--	--	Cellular Component: mitochondrion (GO:0005739);; Cellular Component: membrane (GO:0016020);;	--	WAT1-related protein At5g07050 OS=Arabidopsis thaliana GN=At5g07050 PE=2 SV=1	Os05g0409500 [Oryza sativa Japonica Group]
comp29131_c0	--	--	--	K10400|7e-24|vvi:100255624|hypothetical protein LOC100255624	--	unnamed protein product [Vitis vinifera]
comp8102_c0	[R]	General function prediction only	Molecular Function: DNA photolyase activity (GO:0003913);; Cellular Component: mitochondrion (GO:0005739);; Biological Process: DNA repair (GO:0006281);; Molecular Function: hydrolase activity (GO:0016787);;	--	--	predicted protein [Populus trichocarpa]
comp4696_c0	--	--	Cellular Component: cytoplasmic membrane-bounded vesicle (GO:0016023);;	--	--	PREDICTED: A disintegrin and metalloproteinase with thrombospondin motifs 16-like [Setaria italica]
comp2073_c0	[O]	Posttranslational modification, protein turnover, chaperones	Cellular Component: nucleus (GO:0005634);; Cellular Component: endoplasmic reticulum (GO:0005783);; Cellular Component: cytosol (GO:0005829);; Molecular Function: peptide-methionine (S)-S-oxide reductase activity (GO:0008113);; Cellular Component: chloroplast stroma (GO:0009570);; Biological Process: cold acclimation (GO:0009631);; Biological Process: cellular response to phosphate starvation (GO…	--	Peptide methionine sulfoxide reductase B2, chloroplastic OS=Arabidopsis thaliana GN=MSRB2 PE=1 SV=1	peptide methionine sulfoxide reductase B2 [Arabidopsis thaliana]
comp14046_c0	[D]	Cell cycle control, cell division, chromosome partitioning	Molecular Function: GTPase activity (GO:0003924);; Molecular Function: structural molecule activity (GO:0005198);; Molecular Function: protein binding (GO:0005515);; Molecular Function: GTP binding (GO:0005525);; Cellular Component: microtubule (GO:0005874);; Biological Process: GTP catabolic process (GO:0006184);; Biological Process: microtubule-based movement (GO:0007018);; Biological Process: …	K03531|2e-19|osa:4337316|Os04g0665400	Cell division protein FtsZ homolog 1, chloroplastic OS=Arabidopsis thaliana GN=FTSZ1 PE=1 SV=2	unknown [Picea sitchensis]
comp3214_c0	[O]	Posttranslational modification, protein turnover, chaperones	Cellular Component: nucleus (GO:0005634);; Biological Process: protein import into nucleus (GO:0006606);; Molecular Function: Ran GTPase binding (GO:0008536);;	--	Probable importin-7 homolog OS=Dictyostelium discoideum GN=DDB_G0269860 PE=3 SV=1	PREDICTED: probable importin-7 homolog [Vitis vinifera]
comp17109_c0	[RTKL]	--	Molecular Function: protein kinase activity (GO:0004672);; Molecular Function: ATP binding (GO:0005524);; Biological Process: protein phosphorylation (GO:0006468);; Cellular Component: cytoplasmic membrane-bounded vesicle (GO:0016023);;	--	Probable serine/threonine-protein kinase At1g01540 OS=Arabidopsis thaliana GN=At1g01540 PE=1 SV=2	hypothetical protein PRUPE_ppa007249mg [Prunus persica]
comp21479_c0	--	--	Biological Process: cellular process (GO:0009987);; Biological Process: ammonium transport (GO:0015696);; Cellular Component: membrane (GO:0016020);; Molecular Function: metal ion binding (GO:0046872);;	--	Retrovirus-related Pol polyprotein from transposon TNT 1-94 OS=Nicotiana tabacum PE=2 SV=1	hypothetical protein VITISV_013578 [Vitis vinifera]
comp20900_c0	--	--	--	--	Protein TIFY 4B OS=Arabidopsis thaliana GN=TIFY4B PE=1 SV=1	PREDICTED: protein TIFY 4B-like isoform X7 [Cicer arietinum]
comp14867_c0	--	--	--	--	--	RNA-directed DNA polymerase (Reverse transcriptase), Polynucleotidyl transferase, Ribonuclease H fold-like protein [Theobroma cacao]
comp10176_c0	--	--	Molecular Function: peroxidase activity (GO:0004601);; Cellular Component: cell wall (GO:0005618);; Cellular Component: membrane (GO:0016020);; Molecular Function: heme binding (GO:0020037);; Biological Process: hydrogen peroxide catabolic process (GO:0042744);; Biological Process: respiratory burst (GO:0045730);; Molecular Function: metal ion binding (GO:0046872);; Cellular Component: apoplast (…	--	Peroxidase N1 OS=Nicotiana tabacum GN=poxN1 PE=1 SV=1	PREDICTED: peroxidase N1-like [Vitis vinifera]
comp9163_c0	[LKJ]	--	Molecular Function: nucleic acid binding (GO:0003676);; Molecular Function: ATP-dependent RNA helicase activity (GO:0004004);; Molecular Function: ATP binding (GO:0005524);; Cellular Component: mitochondrion (GO:0005739);; Biological Process: pyrimidine ribonucleotide biosynthetic process (GO:0009220);;	--	ATP-dependent RNA helicase SUPV3L1, mitochondrial OS=Homo sapiens GN=SUPV3L1 PE=1 SV=1	PREDICTED: ATP-dependent RNA helicase SUPV3L1, mitochondrial-like [Vitis vinifera]
comp8505_c1	[P]	Inorganic ion transport and metabolism	Cellular Component: plasma membrane (GO:0005886);; Molecular Function: secondary active sulfate transmembrane transporter activity (GO:0008271);; Biological Process: sulfate transport (GO:0008272);; Biological Process: cellular response to sulfate starvation (GO:0009970);; Cellular Component: integral component of membrane (GO:0016021);; Biological Process: transmembrane transport (GO:0055085);; …	--	Sulfate transporter 1.3 OS=Arabidopsis thaliana GN=SULTR1;3 PE=2 SV=1	unnamed protein product [Vitis vinifera]
comp17907_c0	[O]	Posttranslational modification, protein turnover, chaperones	Biological Process: protein peptidyl-prolyl isomerization (GO:0000413);; Molecular Function: peptidyl-prolyl cis-trans isomerase activity (GO:0003755);; Molecular Function: FK506 binding (GO:0005528);; Biological Process: protein folding (GO:0006457);; Cellular Component: chloroplast thylakoid lumen (GO:0009543);; Cellular Component: membrane (GO:0016020);;	--	Peptidyl-prolyl cis-trans isomerase FKBP17-1, chloroplastic OS=Arabidopsis thaliana GN=FKBP17-1 PE=2 SV=1	predicted protein [Populus trichocarpa]
comp41309_c0	--	--	Molecular Function: organic cyclic compound binding (GO:0097159);; Molecular Function: heterocyclic compound binding (GO:1901363);;	--	Putative ribonuclease H protein At1g65750 OS=Arabidopsis thaliana GN=At1g65750 PE=3 SV=1	RNA-directed DNA polymerase (Reverse transcriptase) [Medicago truncatula]
comp3983_c0	--	--	Molecular Function: catalytic activity (GO:0003824);; Biological Process: metabolic process (GO:0008152);; Molecular Function: carbohydrate binding (GO:0030246);;	--	--	unnamed protein product [Vitis vinifera]
comp27180_c0	--	--	Cellular Component: ubiquitin ligase complex (GO:0000151);; Molecular Function: ubiquitin-protein ligase activity (GO:0004842);; Biological Process: protein ubiquitination (GO:0016567);;	--	U-box domain-containing protein 16 OS=Arabidopsis thaliana GN=PUB16 PE=2 SV=1	PREDICTED: U-box domain-containing protein 16-like [Cucumis sativus]
comp31556_c0	--	--	--	--	LINE-1 reverse transcriptase homolog OS=Nycticebus coucang PE=1 SV=1	hypothetical protein VITISV_011400 [Vitis vinifera]
comp12426_c0	--	--	Molecular Function: glycerone kinase activity (GO:0004371);; Molecular Function: ATP binding (GO:0005524);; Biological Process: glycerol metabolic process (GO:0006071);; Biological Process: phosphorylation (GO:0016310);;	--	Putative 3,4-dihydroxy-2-butanone kinase OS=Solanum lycopersicum GN=DHBK PE=2 SV=1	predicted protein [Populus trichocarpa]
comp9630_c0	--	--	Cellular Component: mitochondrion (GO:0005739);; Cellular Component: chloroplast (GO:0009507);;	--	Pentatricopeptide repeat-containing protein At5g42310, mitochondrial OS=Arabidopsis thaliana GN=At5g42310 PE=2 SV=1	PREDICTED: pentatricopeptide repeat-containing protein At5g42310, mitochondrial [Vitis vinifera]
comp13360_c0	--	--	Molecular Function: binding (GO:0005488);;	--	Transposon TX1 uncharacterized 149 kDa protein OS=Xenopus laevis PE=4 SV=1	hypothetical protein VITISV_020585 [Vitis vinifera]
comp38237_c0	--	--	--	--	--	PREDICTED: probable polyol transporter 6-like [Glycine max]
comp8022_c0	[O]	Posttranslational modification, protein turnover, chaperones	Molecular Function: ubiquitin-protein ligase activity (GO:0004842);; Biological Process: protein deubiquitination (GO:0016579);;	K10581|0.0|rcu:RCOM_0978050|hypothetical protein	Probable ubiquitin-conjugating enzyme E2 23 OS=Arabidopsis thaliana GN=UBC23 PE=3 SV=1	Ubiquitin-conjugating enzyme 23 isoform 2 [Theobroma cacao]
comp46211_c0	[J]	Translation, ribosomal structure and biogenesis	Molecular Function: protein binding (GO:0005515);; Cellular Component: nucleoplasm (GO:0005654);; Biological Process: RNA splicing (GO:0008380);;	K14325|2e-09|rcu:RCOM_1576190|ribonucleic acid binding protein S1, putative	Serine/arginine repetitive matrix protein 1 OS=Homo sapiens GN=SRRM1 PE=1 SV=2	expressed protein [Arabidopsis lyrata subsp. lyrata]
comp4727_c0	--	--	Cellular Component: membrane (GO:0016020);; Cellular Component: cytoplasmic membrane-bounded vesicle (GO:0016023);;	--	--	PREDICTED: uncharacterized protein LOC100253061 [Vitis vinifera]
comp3505_c0	--	--	Biological Process: cellular process (GO:0009987);; Molecular Function: acid-amino acid ligase activity (GO:0016881);; Molecular Function: metal ion binding (GO:0046872);;	--	E3 ubiquitin-protein ligase SDIR1 OS=Arabidopsis thaliana GN=SDIR1 PE=1 SV=1	PREDICTED: mitochondrial ubiquitin ligase activator of nfkb 1 [Vitis vinifera]
comp43986_c0	--	--	Molecular Function: DNA binding (GO:0003677);; Molecular Function: RNA binding (GO:0003723);; Molecular Function: RNA-directed DNA polymerase activity (GO:0003964);; Molecular Function: RNA-DNA hybrid ribonuclease activity (GO:0004523);; Biological Process: RNA-dependent DNA replication (GO:0006278);; Biological Process: DNA recombination (GO:0006310);;	--	Retrovirus-related Pol polyprotein from transposon 17.6 OS=Drosophila melanogaster GN=pol PE=4 SV=1	unnamed protein product [Oryza sativa Japonica Group]
comp23946_c0	--	--	Biological Process: cellular metabolic process (GO:0044237);; Molecular Function: dihydrokaempferol 4-reductase activity (GO:0045552);; Molecular Function: coenzyme binding (GO:0050662);; Biological Process: oxidation-reduction process (GO:0055114);;	K13082|6e-49|sbi:SORBI_03g028880|hypothetical protein	Dihydroflavonol-4-reductase OS=Hordeum vulgare GN=ANT18 PE=3 SV=1	dihydroflavonol 4-reductase [Curcuma alismatifolia]
comp16330_c0	--	--	--	--	Probable galacturonosyltransferase-like 1 OS=Arabidopsis thaliana GN=GATL1 PE=2 SV=1	unknown protein [Oryza sativa Japonica Group]
comp23080_c0	--	--	Cellular Component: mitochondrion (GO:0005739);; Cellular Component: plastid (GO:0009536);;	--	Protein LURP-one-related 8 OS=Arabidopsis thaliana GN=At2g38640 PE=2 SV=1	PREDICTED: protein LURP-one-related 8 [Vitis vinifera]
comp3119_c0	--	--	Cellular Component: plastid (GO:0009536);;	--	Formin-like protein 20 OS=Arabidopsis thaliana GN=FH20 PE=2 SV=3	Zim17-type zinc finger protein [Theobroma cacao]
comp5772_c0	--	--	Cellular Component: plastid (GO:0009536);;	--	--	PREDICTED: uncharacterized protein LOC100257820 [Vitis vinifera]
comp11504_c0	--	--	Biological Process: MAPK cascade (GO:0000165);; Molecular Function: nucleotide binding (GO:0000166);; Molecular Function: protein serine/threonine kinase activity (GO:0004674);; Biological Process: protein phosphorylation (GO:0006468);; Molecular Function: oxidoreductase activity (GO:0016491);;	--	Probable LRR receptor-like serine/threonine-protein kinase At1g53430 OS=Arabidopsis thaliana GN=At1g53430 PE=1 SV=1	leucine-rich repeat-containing protein kinase family protein [Musa acuminata]
comp4910_c0	--	--	--	K12617|0.0|vvi:100255521|hypothetical protein LOC100255521	Protein PAT1 homolog 1 OS=Pongo abelii GN=PATL1 PE=2 SV=1	PREDICTED: uncharacterized protein LOC100255521 [Vitis vinifera]
comp2176_c0	--	--	Cellular Component: nucleus (GO:0005634);; Cellular Component: cytosol (GO:0005829);; Biological Process: nucleotide-sugar biosynthetic process (GO:0009226);; Molecular Function: UDP-glucuronate decarboxylase activity (GO:0048040);; Molecular Function: NAD binding (GO:0051287);;	K12449|9e-19|vvi:100262362|hypothetical protein LOC100262362	--	unknown [Lotus japonicus]
comp46324_c0	--	--	--	--	Pentatricopeptide repeat-containing protein At4g02750 OS=Arabidopsis thaliana GN=PCMP-H24 PE=3 SV=1	unnamed protein product [Vitis vinifera]
comp6570_c0	[E]	Amino acid transport and metabolism	Molecular Function: aminopeptidase activity (GO:0004177);; Biological Process: proteolysis (GO:0006508);; Cellular Component: chloroplast stroma (GO:0009570);; Biological Process: cellular process (GO:0009987);;	K01262|0.0|rcu:RCOM_1431630|xaa-pro aminopeptidase, putative (EC:3.4.11.9)	Probable Xaa-Pro aminopeptidase P OS=Aspergillus terreus (strain NIH 2624 / FGSC A1156) GN=ampp PE=3 SV=1	xaa-pro aminopeptidase, putative [Ricinus communis]
comp18495_c0	--	--	Molecular Function: hydrolase activity, hydrolyzing O-glycosyl compounds (GO:0004553);; Cellular Component: cell wall (GO:0005618);; Biological Process: cellular glucan metabolic process (GO:0006073);; Cellular Component: cytoplasmic membrane-bounded vesicle (GO:0016023);; Molecular Function: xyloglucan:xyloglucosyl transferase activity (GO:0016762);; Cellular Component: apoplast (GO:0048046);;	K08235|6e-85|sbi:SORBI_04g002290|hypothetical protein	Probable xyloglucan endotransglucosylase/hydrolase protein 30 OS=Arabidopsis thaliana GN=XTH30 PE=2 SV=2	hypothetical protein PRUPE_ppa007685mg [Prunus persica]
comp36721_c0	[C]	Energy production and conversion	Molecular Function: phosphoenolpyruvate carboxykinase (ATP) activity (GO:0004612);; Molecular Function: ATP binding (GO:0005524);; Cellular Component: nucleolus (GO:0005730);; Cellular Component: cytosol (GO:0005829);; Biological Process: gluconeogenesis (GO:0006094);; Biological Process: defense response to fungus, incompatible interaction (GO:0009817);; Cellular Component: membrane (GO:0016020)…	K01610|2e-76|rcu:RCOM_1584090|Phosphoenolpyruvate carboxykinase [ATP], putative (EC:4.1.1.49)	Phosphoenolpyruvate carboxykinase [ATP] OS=Arabidopsis thaliana GN=PCKA PE=1 SV=1	unknown [Picea sitchensis]
comp4966_c0	[K]	Transcription	Molecular Function: binding (GO:0005488);; Biological Process: transcription, DNA-templated (GO:0006351);;	--	MADS-box protein SOC1 OS=Arabidopsis thaliana GN=SOC1 PE=1 SV=1	agamous-like MADS box protein OPMADS1 [Elaeis guineensis]
comp5162_c0	--	--	Cellular Component: nucleus (GO:0005634);; Molecular Function: TBP-class protein binding (GO:0017025);; Molecular Function: organic cyclic compound binding (GO:0097159);; Molecular Function: heterocyclic compound binding (GO:1901363);;	--	Pre-rRNA-processing protein esf2 OS=Schizosaccharomyces pombe (strain 972 / ATCC 24843) GN=esf2 PE=1 SV=1	PREDICTED: pre-rRNA-processing protein ESF2 [Vitis vinifera]
comp2320_c0	[T]	Signal transduction mechanisms	Biological Process: mitotic G2 phase (GO:0000085);; Biological Process: nuclear-transcribed mRNA catabolic process (GO:0000956);; Molecular Function: histone acetyltransferase activity (GO:0004402);; Cellular Component: heterotrimeric G-protein complex (GO:0005834);; Biological Process: chromatin silencing (GO:0006342);; Biological Process: response to cold (GO:0009409);; Biological Process: phot…	K04508|0.0|vvi:100256008|hypothetical protein LOC100256008	F-box-like/WD repeat-containing protein TBL1XR1 OS=Mus musculus GN=Tbl1xr1 PE=2 SV=1	hypothetical protein PRUPE_ppa003666mg [Prunus persica]
comp11328_c0	--	--	Molecular Function: triglyceride lipase activity (GO:0004806);; Molecular Function: calmodulin binding (GO:0005516);; Biological Process: response to stress (GO:0006950);; Biological Process: lipid catabolic process (GO:0016042);;	--	Sn1-specific diacylglycerol lipase beta OS=Homo sapiens GN=DAGLB PE=1 SV=2	Alpha/beta-Hydrolases superfamily protein isoform 1 [Theobroma cacao]
comp17417_c0	--	--	Biological Process: cellular process (GO:0009987);; Cellular Component: intracellular membrane-bounded organelle (GO:0043231);;	K03126|1e-10|osa:4325055|Os01g0858500	Putative uncharacterized protein DDB_G0294196 OS=Dictyostelium discoideum GN=DDB_G0294196 PE=4 SV=1	predicted protein [Bathycoccus prasinos]
comp28577_c0	--	--	--	--	--	PREDICTED: uncharacterized protein LOC100854539 [Vitis vinifera]
comp28478_c0	--	--	--	--	--	hypothetical protein MTR_8g103960 [Medicago truncatula]
comp9269_c0	--	--	Cellular Component: plastid (GO:0009536);; Biological Process: cellular process (GO:0009987);; Biological Process: single-organism carbohydrate metabolic process (GO:0044723);;	--	Vacuolar protein sorting-associated protein 51 homolog OS=Dictyostelium discoideum GN=vps51 PE=3 SV=1	PREDICTED: protein fat-free homolog [Vitis vinifera]
comp23599_c0	--	--	Biological Process: MAPK cascade (GO:0000165);; Molecular Function: nucleotide binding (GO:0000166);; Molecular Function: protein serine/threonine kinase activity (GO:0004674);; Biological Process: protein phosphorylation (GO:0006468);;	--	Probable serine/threonine-protein kinase At1g01540 OS=Arabidopsis thaliana GN=At1g01540 PE=1 SV=2	unnamed protein product [Vitis vinifera]
comp31232_c0	--	--	Molecular Function: sequence-specific DNA binding transcription factor activity (GO:0003700);; Cellular Component: nucleus (GO:0005634);; Biological Process: regulation of transcription, DNA-templated (GO:0006355);; Biological Process: response to gibberellin (GO:0009739);;	--	Scarecrow-like protein 3 OS=Arabidopsis thaliana GN=SCL3 PE=2 SV=1	Scarecrow-like 3 [Theobroma cacao]
comp4470_c0	--	--	Molecular Function: metal ion binding (GO:0046872);;	--	Zinc finger A20 and AN1 domain-containing stress-associated protein 1 OS=Oryza sativa subsp. japonica GN=SAP1 PE=2 SV=2	PREDICTED: zinc finger A20 and AN1 domain-containing stress-associated protein 1-like [Setaria italica]
comp10397_c0	[E]	Amino acid transport and metabolism	Cellular Component: chloroplast (GO:0009507);; Molecular Function: oxidoreductase activity (GO:0016491);;	--	--	PREDICTED: FAD-dependent oxidoreductase domain-containing protein 1-like [Vitis vinifera]
comp15283_c0	--	--	--	--	Vegetative cell wall protein gp1 OS=Chlamydomonas reinhardtii GN=GP1 PE=2 SV=1	hypothetical protein EMIHUDRAFT_463290 [Emiliania huxleyi CCMP1516]
comp31583_c0	--	--	--	--	Pentatricopeptide repeat-containing protein At5g66520 OS=Arabidopsis thaliana GN=PCMP-H61 PE=2 SV=1	PREDICTED: pentatricopeptide repeat-containing protein At4g18840-like [Brachypodium distachyon]
comp17187_c0	--	--	Cellular Component: nucleus (GO:0005634);; Cellular Component: plasmodesma (GO:0009506);; Molecular Function: oxidoreductase activity, acting on paired donors, with incorporation or reduction of molecular oxygen, 2-oxoglutarate as one donor, and incorporation of one atom each of oxygen into both donors (GO:0016706);; Biological Process: oxidation-reduction process (GO:0055114);;	--	RNA demethylase ALKBH5 OS=Danio rerio GN=alkbh5 PE=2 SV=1	Oxidoreductase, putative [Theobroma cacao]
comp31659_c0	[P]	Inorganic ion transport and metabolism	Biological Process: amino acid transport (GO:0006865);; Molecular Function: ammonium transmembrane transporter activity (GO:0008519);; Biological Process: response to external stimulus (GO:0009605);; Biological Process: response to bacterium (GO:0009617);; Biological Process: systemic acquired resistance (GO:0009627);; Biological Process: response to hexose (GO:0009746);; Biological Process: horm…	--	Ammonium transporter 3 member 1 OS=Oryza sativa subsp. japonica GN=AMT3-1 PE=2 SV=1	PREDICTED: ammonium transporter 3 member 1-like [Brachypodium distachyon]
comp19850_c0	[R]	General function prediction only	--	--	--	hypothetical protein SELMODRAFT_90391 [Selaginella moellendorffii]
comp4650_c0	--	--	Cellular Component: Golgi apparatus (GO:0005794);; Cellular Component: chloroplast (GO:0009507);; Biological Process: rhamnogalacturonan II biosynthetic process (GO:0010306);; Molecular Function: UDP-xylosyltransferase activity (GO:0035252);; Biological Process: pollen tube development (GO:0048868);;	K11714|0.0|vvi:100249591|hypothetical protein LOC100249591	UDP-galactose:fucoside alpha-3-galactosyltransferase OS=Dictyostelium discoideum GN=agtA PE=1 SV=1	PREDICTED: UDP-galactose:fucoside alpha-3-galactosyltransferase [Vitis vinifera]
comp9894_c0	--	--	--	--	Centromere-associated protein E OS=Homo sapiens GN=CENPE PE=1 SV=2	F-box and Leucine Rich Repeat domains containing protein, putative isoform 1 [Theobroma cacao]
comp40683_c0	--	--	--	--	--	protein with unknown function [Ricinus communis]
comp3853_c0	--	--	--	--	BTB/POZ domain-containing protein At3g05675 OS=Arabidopsis thaliana GN=At3g05675 PE=2 SV=1	PREDICTED: BTB/POZ domain-containing protein At3g05675 isoform 1 [Vitis vinifera]
comp1435_c0	--	--	Cellular Component: Golgi apparatus (GO:0005794);; Biological Process: glucose catabolic process (GO:0006007);; Molecular Function: galactosyltransferase activity (GO:0008378);; Biological Process: xyloglucan biosynthetic process (GO:0009969);; Molecular Function: organic cyclic compound binding (GO:0097159);; Molecular Function: heterocyclic compound binding (GO:1901363);;	--	Xyloglucan galactosyltransferase KATAMARI1 homolog OS=Oryza sativa subsp. japonica GN=Os03g0144800 PE=2 SV=1	hypothetical protein PRUPE_ppa003851mg [Prunus persica]
comp32160_c0	--	--	Biological Process: RNA splicing, via endonucleolytic cleavage and ligation (GO:0000394);; Cellular Component: mitochondrion (GO:0005739);; Biological Process: methionine biosynthetic process (GO:0009086);; Cellular Component: plastid (GO:0009536);; Biological Process: cellular cation homeostasis (GO:0030003);;	--	--	uncharacterized protein LOC100790552 [Glycine max]
comp5813_c0	[M]	Cell wall/membrane/envelope biogenesis	Cellular Component: endoplasmic reticulum (GO:0005783);; Cellular Component: plasma membrane (GO:0005886);; Biological Process: response to cold (GO:0009409);; Molecular Function: cellulose synthase (UDP-forming) activity (GO:0016760);; Cellular Component: integral component of Golgi membrane (GO:0030173);; Biological Process: cellulose biosynthetic process (GO:0030244);; Biological Process: root…	--	Cellulose synthase-like protein D2 OS=Oryza sativa subsp. indica GN=CSLD2 PE=2 SV=1	PREDICTED: cellulose synthase-like protein D3-like [Vitis vinifera]
comp7661_c0	--	--	Molecular Function: oxidoreductase activity (GO:0016491);; Molecular Function: metal ion binding (GO:0046872);;	--	Cytochrome P450 704C1 OS=Pinus taeda GN=CYP704C1 PE=2 SV=1	Cytochrome P450 family protein [Theobroma cacao]
comp10883_c0	--	--	--	--	Formin-like protein 6 OS=Oryza sativa subsp. japonica GN=FH6 PE=2 SV=2	hypothetical protein EDEG_00328 [Edhazardia aedis USNM 41457]
comp21318_c0	--	--	--	--	Ena/VASP-like protein OS=Homo sapiens GN=EVL PE=1 SV=2	PREDICTED: uncharacterized protein LOC100798085 [Glycine max]
comp29950_c0	[Q]	Secondary metabolites biosynthesis, transport and catabolism	Molecular Function: monooxygenase activity (GO:0004497);; Molecular Function: iron ion binding (GO:0005506);; Molecular Function: electron carrier activity (GO:0009055);; Cellular Component: cytoplasmic membrane-bounded vesicle (GO:0016023);; Molecular Function: oxidoreductase activity, acting on paired donors, with incorporation or reduction of molecular oxygen (GO:0016705);; Molecular Function:…	--	Cytochrome P450 734A1 OS=Arabidopsis thaliana GN=CYP734A1 PE=2 SV=1	hypothetical protein OsI_19923 [Oryza sativa Indica Group]
comp12786_c0	--	--	--	--	Uncharacterized protein At4g26450 OS=Arabidopsis thaliana GN=At4g26450 PE=4 SV=1	hypothetical protein VITISV_002699 [Vitis vinifera]
comp5134_c0	[C]	Energy production and conversion	Molecular Function: dihydrolipoyllysine-residue succinyltransferase activity (GO:0004149);; Molecular Function: dihydrolipoyllysine-residue acetyltransferase activity (GO:0004742);; Molecular Function: ATP binding (GO:0005524);; Cellular Component: mitochondrion (GO:0005739);; Biological Process: pyruvate metabolic process (GO:0006090);; Biological Process: response to sucrose (GO:0009744);; Biol…	K00627|0.0|vvi:100243846|hypothetical protein LOC100243846	Dihydrolipoyllysine-residue acetyltransferase component 1 of pyruvate dehydrogenase complex, mitochondrial OS=Arabidopsis thaliana GN=LTA3 PE=1 SV=2	PREDICTED: dihydrolipoyllysine-residue acetyltransferase component 1 of pyruvate dehydrogenase complex, mitochondrial-like [Vitis vinifera]
comp41727_c0	--	--	--	--	--	hypothetical protein VITISV_025709 [Vitis vinifera]
comp36026_c0	--	--	Molecular Function: protein serine/threonine/tyrosine kinase activity (GO:0004712);; Molecular Function: protein tyrosine kinase activity (GO:0004713);; Biological Process: phosphorylation (GO:0016310);; Biological Process: endoplasmic reticulum unfolded protein response (GO:0030968);;	--	--	PREDICTED: mitogen-activated protein kinase kinase kinase 7-like [Vitis vinifera]
comp6768_c0	--	--	--	--	--	hypothetical protein OsI_32949 [Oryza sativa Indica Group]
comp26307_c0	--	--	Molecular Function: catalytic activity (GO:0003824);;	--	--	hypothetical protein VITISV_037042 [Vitis vinifera]
comp1183_c0	--	--	--	--	Uncharacterized protein LOC284861 OS=Homo sapiens PE=2 SV=1	predicted protein [Populus trichocarpa]
comp24400_c0	--	--	Cellular Component: plastid (GO:0009536);; Cellular Component: membrane (GO:0016020);;	--	Vegetative cell wall protein gp1 OS=Chlamydomonas reinhardtii GN=GP1 PE=2 SV=1	PREDICTED: uncharacterized protein LOC101786972 [Setaria italica]
comp13834_c0	[E]	Amino acid transport and metabolism	Molecular Function: acetyl-CoA:L-glutamate N-acetyltransferase activity (GO:0004042);; Cellular Component: mitochondrion (GO:0005739);; Biological Process: arginine biosynthetic process (GO:0006526);; Cellular Component: plastid (GO:0009536);;	K14682|8e-40|sbi:SORBI_01g031570|hypothetical protein	Amino-acid acetyltransferase OS=Pseudomonas syringae pv. syringae (strain B728a) GN=argA PE=3 SV=1	hypothetical protein OsI_12155 [Oryza sativa Indica Group]
comp9_c0	--	--	Molecular Function: copper ion binding (GO:0005507);; Cellular Component: nucleus (GO:0005634);; Cellular Component: cytoplasm (GO:0005737);;	--	Metallothionein type 2b OS=Colocasia esculenta PE=1 SV=1	RecName: Full=Metallothionein type 2b; Short=CeMT2b
comp38139_c0	[IR]	--	Cellular Component: extracellular region (GO:0005576);; Biological Process: lipid metabolic process (GO:0006629);;	--	GDSL esterase/lipase At1g71691 OS=Arabidopsis thaliana GN=At1g71691 PE=2 SV=1	unnamed protein product [Vitis vinifera]
comp2843_c0	[O]	Posttranslational modification, protein turnover, chaperones	Cellular Component: cytoplasm (GO:0005737);; Biological Process: proteolysis (GO:0006508);; Molecular Function: omega peptidase activity (GO:0008242);;	K09602|1e-140|rcu:RCOM_2004830|hypothetical protein	Ubiquitin thioesterase otubain-like OS=Arabidopsis thaliana GN=At1g28120 PE=2 SV=2	conserved hypothetical protein [Ricinus communis]
comp84_c0	[CHR]	--	Cellular Component: mitochondrion (GO:0005739);; Molecular Function: formate dehydrogenase (NAD+) activity (GO:0008863);; Cellular Component: chloroplast (GO:0009507);; Cellular Component: thylakoid (GO:0009579);; Biological Process: response to wounding (GO:0009611);; Molecular Function: oxidoreductase activity, acting on the CH-OH group of donors, NAD or NADP as acceptor (GO:0016616);; Biologic…	K00122|0.0|vvi:100261093|hypothetical protein LOC100261093	Formate dehydrogenase, mitochondrial OS=Solanum tuberosum GN=FDH1 PE=1 SV=2	PREDICTED: formate dehydrogenase, mitochondrial [Vitis vinifera]
comp9761_c0	--	--	Molecular Function: SNAP receptor activity (GO:0005484);; Cellular Component: nucleus (GO:0005634);; Cellular Component: trans-Golgi network (GO:0005802);; Cellular Component: cytosol (GO:0005829);; Cellular Component: plasma membrane (GO:0005886);; Biological Process: intracellular protein transport (GO:0006886);; Cellular Component: cell plate (GO:0009504);; Cellular Component: plasmodesma (GO:…	--	Syntaxin-132 OS=Arabidopsis thaliana GN=SYP132 PE=1 SV=1	syntaxin, putative [Ricinus communis]
comp7607_c0	[R]	General function prediction only	Molecular Function: metalloendopeptidase activity (GO:0004222);; Cellular Component: mitochondrion (GO:0005739);; Biological Process: rRNA processing (GO:0006364);; Cellular Component: chloroplast (GO:0009507);; Biological Process: dephosphorylation (GO:0016311);; Molecular Function: phosphatase activity (GO:0016791);; Molecular Function: metal ion binding (GO:0046872);;	K07042|1e-128|pop:POPTR_1105606|hydrolase family protein (EC:3.1.3.12)	Phosphatase YidA OS=Shigella flexneri GN=yidA PE=3 SV=1	unnamed protein product [Arabidopsis thaliana]
comp11413_c0	--	--	Cellular Component: mitochondrion (GO:0005739);;	--	Uncharacterized CRM domain-containing protein At3g25440, chloroplastic OS=Arabidopsis thaliana GN=At3g25440 PE=2 SV=1	hypothetical protein OsI_18436 [Oryza sativa Indica Group]
comp12340_c0	--	--	Cellular Component: plastid (GO:0009536);;	--	Protein PHLOEM PROTEIN 2-LIKE A1 OS=Arabidopsis thaliana GN=PP2A1 PE=2 SV=1	unnamed protein product [Vitis vinifera]
comp3384_c0	[R]	General function prediction only	Molecular Function: histone acetyltransferase activity (GO:0004402);; Cellular Component: nucleolus (GO:0005730);; Cellular Component: cytoplasm (GO:0005737);; Biological Process: unidimensional cell growth (GO:0009826);; Biological Process: flower development (GO:0009908);; Biological Process: leaf morphogenesis (GO:0009965);; Biological Process: trichome morphogenesis (GO:0010090);; Biological …	K10752|0.0|rcu:RCOM_1046940|WD-repeat protein, putative (EC:2.3.1.48)	WD-40 repeat-containing protein MSI4 OS=Arabidopsis thaliana GN=MSI4 PE=1 SV=3	FVE [x Doritaenopsis hybrid cultivar]
comp9169_c0	--	--	--	--	Uncharacterized protein At1g01500 OS=Arabidopsis thaliana GN=At1g01500 PE=2 SV=1	PREDICTED: uncharacterized protein At1g01500-like [Vitis vinifera]
comp41620_c0	--	--	--	--	--	gag-pol polyprotein [Phaseolus vulgaris]
comp16817_c0	[J]	Translation, ribosomal structure and biogenesis	Molecular Function: catalytic activity (GO:0003824);; Biological Process: metabolic process (GO:0008152);; Cellular Component: integral component of membrane (GO:0016021);; Cellular Component: extrinsic component of membrane (GO:0019898);;	--	LanC-like protein 2 OS=Mus musculus GN=Lancl2 PE=1 SV=1	predicted protein [Populus trichocarpa]
comp2460_c0	[J]	Translation, ribosomal structure and biogenesis	Molecular Function: RNA binding (GO:0003723);; Cellular Component: ribosome (GO:0005840);; Cellular Component: chloroplast stroma (GO:0009570);; Cellular Component: chloroplast envelope (GO:0009941);; Biological Process: isopentenyl diphosphate biosynthetic process, methylerythritol 4-phosphate pathway (GO:0019288);;	K02879|7e-87|ath:AT3G54210|ribosomal protein L17 family protein	50S ribosomal protein L17, chloroplastic OS=Arabidopsis thaliana GN=RPL17 PE=2 SV=1	Ribosomal protein L17 family protein isoform 1 [Theobroma cacao]
comp4047_c0	[RTKL]	--	Molecular Function: protein serine/threonine kinase activity (GO:0004674);; Molecular Function: protein serine/threonine/tyrosine kinase activity (GO:0004712);; Molecular Function: ATP binding (GO:0005524);; Biological Process: protein phosphorylation (GO:0006468);;	--	Serine/threonine-protein kinase HT1 OS=Arabidopsis thaliana GN=HT1 PE=1 SV=1	PREDICTED: serine/threonine-protein kinase HT1-like [Vitis vinifera]
comp13651_c0	--	--	Molecular Function: copper ion binding (GO:0005507);; Molecular Function: electron carrier activity (GO:0009055);;	--	Early nodulin-like protein 1 OS=Oryza sativa subsp. japonica GN=ENODL1 PE=1 SV=1	Early nodulin-like protein 3, putative [Theobroma cacao]
comp12214_c0	[R]	General function prediction only	--	--	Mediator of RNA polymerase II transcription subunit 15a OS=Arabidopsis thaliana GN=MED15A PE=1 SV=1	transcription cofactor, putative [Ricinus communis]
comp5498_c0	--	--	--	--	Auxilin-related protein 1 OS=Arabidopsis thaliana GN=At4g12780 PE=1 SV=2	hypothetical protein OsI_38641 [Oryza sativa Indica Group]
comp925_c0	[QR]	--	Cellular Component: nucleus (GO:0005634);; Cellular Component: cytoplasm (GO:0005737);; Cellular Component: plasma membrane (GO:0005886);; Biological Process: lignin biosynthetic process (GO:0009809);; Molecular Function: quercetin 3-O-methyltransferase activity (GO:0030755);; Biological Process: methylation (GO:0032259);; Molecular Function: myricetin 3'-O-methyltransferase activity (GO:0033799)…	K05279|1e-157|vvi:100258977|hypothetical protein LOC100258977	Caffeic acid 3-O-methyltransferase OS=Catharanthus roseus GN=COMT1 PE=2 SV=1	catechol O-methyltransferase [Thalictrum tuberosum]
comp105_c0	--	--	Cellular Component: endosome (GO:0005768);; Cellular Component: Golgi apparatus (GO:0005794);; Cellular Component: trans-Golgi network (GO:0005802);; Biological Process: secondary cell wall biogenesis (GO:0009834);; Biological Process: glucuronoxylan biosynthetic process (GO:0010417);; Cellular Component: membrane (GO:0016020);; Molecular Function: glucuronoxylan glucuronosyltransferase activity …	--	Probable beta-1,4-xylosyltransferase IRX10L OS=Arabidopsis thaliana GN=IRX10L PE=2 SV=1	PREDICTED: probable beta-1,4-xylosyltransferase IRX10L [Vitis vinifera]
comp10248_c0	--	--	--	K13153|5e-43|rcu:RCOM_0900820|hypothetical protein	U11/U12 small nuclear ribonucleoprotein 25 kDa protein OS=Homo sapiens GN=SNRNP25 PE=1 SV=1	conserved hypothetical protein [Ricinus communis]
comp32753_c0	--	--	Molecular Function: nucleotide binding (GO:0000166);; Molecular Function: nucleic acid binding (GO:0003676);; Molecular Function: transferase activity, transferring phosphorus-containing groups (GO:0016772);; Molecular Function: ion binding (GO:0043167);; Biological Process: primary metabolic process (GO:0044238);; Biological Process: cellular macromolecule metabolic process (GO:0044260);;	--	--	reverse transcriptase [Fagus sylvatica]
comp26055_c0	--	--	Molecular Function: catalytic activity (GO:0003824);; Molecular Function: binding (GO:0005488);;	--	--	PREDICTED: probable methyltransferase PMT28 [Vitis vinifera]
comp778_c0	[P]	Inorganic ion transport and metabolism	Molecular Function: ferroxidase activity (GO:0004322);; Biological Process: iron ion transport (GO:0006826);; Biological Process: cellular iron ion homeostasis (GO:0006879);; Biological Process: response to oxidative stress (GO:0006979);; Molecular Function: ferric iron binding (GO:0008199);; Cellular Component: chloroplast (GO:0009507);; Biological Process: response to abscisic acid (GO:0009737)…	K00522|1e-115|pop:POPTR_822369|hypothetical protein	Ferritin-3, chloroplastic OS=Glycine max PE=2 SV=1	ferritin-3, chloroplastic [Glycine max]
comp13142_c0	--	--	Molecular Function: ribonuclease activity (GO:0004540);; Cellular Component: mitochondrion (GO:0005739);;	--	Poly(A)-specific ribonuclease PARN-like OS=Arabidopsis thaliana GN=At3g25430 PE=2 SV=1	Polynucleotidyl transferase, ribonuclease H-like superfamily protein, putative isoform 1 [Theobroma cacao]
comp12408_c0	--	--	Biological Process: maltose metabolic process (GO:0000023);; Biological Process: polysaccharide catabolic process (GO:0000272);; Cellular Component: mitochondrion (GO:0005739);; Biological Process: pentose-phosphate shunt (GO:0006098);; Biological Process: phosphatidylglycerol biosynthetic process (GO:0006655);; Cellular Component: plastid (GO:0009536);; Biological Process: plant-type cell wall o…	--	Pentatricopeptide repeat-containing protein At4g31850, chloroplastic OS=Arabidopsis thaliana GN=PGR3 PE=1 SV=1	PREDICTED: pentatricopeptide repeat-containing protein At4g31850, chloroplastic [Vitis vinifera]
comp23537_c0	--	--	Molecular Function: transferase activity, transferring phosphorus-containing groups (GO:0016772);; Biological Process: primary metabolic process (GO:0044238);; Biological Process: organic substance metabolic process (GO:0071704);; Molecular Function: organic cyclic compound binding (GO:0097159);; Molecular Function: heterocyclic compound binding (GO:1901363);;	--	Putative ribonuclease H protein At1g65750 OS=Arabidopsis thaliana GN=At1g65750 PE=3 SV=1	hypothetical protein VITISV_011546 [Vitis vinifera]
comp1917_c0	--	--	Cellular Component: plastid (GO:0009536);;	--	Protein ycf2 OS=Lemna minor GN=ycf2-A PE=3 SV=1	photosystem I assembly protein Ycf2 (chloroplast) [Colocasia esculenta]
comp38502_c0	--	--	Molecular Function: protein kinase activity (GO:0004672);; Molecular Function: binding (GO:0005488);;	--	L-type lectin-domain containing receptor kinase IX.1 OS=Arabidopsis thaliana GN=LECRK91 PE=2 SV=1	PREDICTED: L-type lectin-domain containing receptor kinase IX.1-like [Glycine max]
comp27618_c0	--	--	Biological Process: regulation of transcription, DNA-templated (GO:0006355);; Biological Process: defense response (GO:0006952);; Biological Process: signal transduction (GO:0007165);; Biological Process: stomatal complex morphogenesis (GO:0010103);; Biological Process: cell differentiation (GO:0030154);; Biological Process: negative regulation of biological process (GO:0048519);; Biological Proc…	--	Transcription factor FAMA OS=Arabidopsis thaliana GN=FMA PE=1 SV=1	DNA binding protein, putative [Ricinus communis]
comp670_c0	--	--	--	--	Curculin-2 OS=Curculigo latifolia PE=1 SV=1	12kD storage protein [Colocasia esculenta]
comp9196_c0	[H]	Coenzyme transport and metabolism	Molecular Function: NAD+ synthase (glutamine-hydrolyzing) activity (GO:0003952);; Molecular Function: ATP binding (GO:0005524);; Cellular Component: cytosol (GO:0005829);; Biological Process: NAD biosynthetic process (GO:0009435);; Molecular Function: hydrolase activity, acting on carbon-nitrogen (but not peptide) bonds (GO:0016810);; Biological Process: response to cadmium ion (GO:0046686);;	K01950|0.0|pop:POPTR_751166|NAD+ synthase (glutamine-hydrolysing) (EC:6.3.5.1)	Glutamine-dependent NAD(+) synthetase OS=Dictyostelium discoideum GN=nadsyn1 PE=3 SV=1	PREDICTED: glutamine-dependent NAD(+) synthetase-like [Brachypodium distachyon]
comp25190_c0	--	--	--	--	--	uncharacterized protein LOC100134881 [Solanum lycopersicum]
comp10354_c0	[L]	Replication, recombination and repair	Molecular Function: single-stranded DNA binding (GO:0003697);; Cellular Component: mitochondrion (GO:0005739);;	K03111|9e-84|rcu:RCOM_1618400|Single-stranded DNA-binding protein, mitochondrial precursor, putative	Single-stranded DNA-binding protein, mitochondrial OS=Arabidopsis thaliana GN=At4g11060 PE=2 SV=1	unknown [Medicago truncatula]
comp32311_c0	--	--	--	--	--	hypothetical protein VITISV_035517 [Vitis vinifera]
comp44341_c0	--	--	Molecular Function: nucleic acid binding (GO:0003676);; Molecular Function: catalytic activity (GO:0003824);; Biological Process: DNA metabolic process (GO:0006259);;	--	Uncharacterized mitochondrial protein AtMg01250 OS=Arabidopsis thaliana GN=AtMg01250 PE=4 SV=1	hypothetical protein VITISV_034203 [Vitis vinifera]
comp23642_c0	--	--	--	--	Translation initiation factor IF-2 OS=Frankia alni (strain ACN14a) GN=infB PE=3 SV=1	PREDICTED: baculoviral IAP repeat-containing protein 2-like [Setaria italica]
comp41844_c0	--	--	Cellular Component: 1,3-beta-D-glucan synthase complex (GO:0000148);; Molecular Function: 1,3-beta-D-glucan synthase activity (GO:0003843);; Biological Process: (1->3)-beta-D-glucan biosynthetic process (GO:0006075);; Biological Process: microsporogenesis (GO:0009556);; Biological Process: callose deposition in cell wall (GO:0052543);;	--	Putative callose synthase 8 OS=Arabidopsis thaliana GN=CALS8 PE=2 SV=2	hypothetical protein SORBIDRAFT_04g008830 [Sorghum bicolor]
comp5233_c0	[J]	Translation, ribosomal structure and biogenesis	Molecular Function: 3'-5'-exoribonuclease activity (GO:0000175);; Molecular Function: RNA binding (GO:0003723);; Cellular Component: cytosol (GO:0005829);; Biological Process: RNA processing (GO:0006396);; Biological Process: transcription factor import into nucleus (GO:0042991);;	K12586|6e-89|rcu:RCOM_0374000|exosome complex exonuclease rrp43, putative	Exosome complex component RRP43 OS=Bos taurus GN=EXOSC8 PE=2 SV=1	exosome complex exonuclease rrp43, putative [Ricinus communis]
comp16873_c0	--	--	--	K13171|3e-09|ath:AT2G29210|splicing factor PWI domain-containing protein	Transcription factor Maf OS=Bos taurus GN=MAF PE=2 SV=1	putative proline-rich protein [Arabidopsis thaliana]
comp36619_c0	--	--	Molecular Function: catalytic activity (GO:0003824);; Molecular Function: binding (GO:0005488);; Biological Process: primary metabolic process (GO:0044238);; Biological Process: organic substance metabolic process (GO:0071704);;	--	Retrovirus-related Pol polyprotein from transposon TNT 1-94 OS=Nicotiana tabacum PE=2 SV=1	retrotransposon protein, putative, Ty1-copia subclass [Oryza sativa Japonica Group]
comp10794_c0	[R]	General function prediction only	Molecular Function: triglyceride lipase activity (GO:0004806);; Molecular Function: GTP binding (GO:0005525);; Biological Process: fatty acid beta-oxidation (GO:0006635);; Cellular Component: monolayer-surrounded lipid storage body (GO:0012511);; Biological Process: protein import into peroxisome matrix (GO:0016558);; Biological Process: triglyceride catabolic process (GO:0019433);; Biological Pr…	K14674|4e-86|vvi:100258980|hypothetical protein LOC100258980	Triacylglycerol lipase SDP1 OS=Arabidopsis thaliana GN=SDP1 PE=1 SV=1	unnamed protein product [Vitis vinifera]
comp7360_c0	--	--	Biological Process: cell morphogenesis (GO:0000902);; Cellular Component: Arp2/3 protein complex (GO:0005885);; Biological Process: Arp2/3 complex-mediated actin nucleation (GO:0034314);;	K05755|1e-112|osa:4334780|Os03g0848300	Actin-related protein 2/3 complex subunit 4 OS=Arabidopsis thaliana GN=ARPC4 PE=1 SV=1	uncharacterized protein LOC100527736 [Glycine max]
comp10234_c0	--	--	Molecular Function: nucleotide binding (GO:0000166);; Molecular Function: nucleic acid binding (GO:0003676);; Biological Process: nucleobase-containing compound metabolic process (GO:0006139);; Biological Process: proteolysis (GO:0006508);; Molecular Function: nucleoside-triphosphatase activity (GO:0017111);; Biological Process: protein catabolic process (GO:0030163);; Biological Process: cellula…	--	--	reverse transcriptase family member [Glycine max]
comp13315_c0	[D]	Cell cycle control, cell division, chromosome partitioning	Biological Process: nuclear division (GO:0000280);; Biological Process: cytokinesis by cell plate formation (GO:0000911);; Cellular Component: nucleus (GO:0005634);; Cellular Component: vacuole (GO:0005773);; Cellular Component: spindle (GO:0005819);; Molecular Function: microtubule binding (GO:0008017);; Cellular Component: phragmoplast (GO:0009524);; Cellular Component: preprophase band (GO:000…	--	65-kDa microtubule-associated protein 3 OS=Arabidopsis thaliana GN=MAP65-3 PE=1 SV=1	hypothetical protein PRUPE_ppa002178mg [Prunus persica]
comp573_c0	[G]	Carbohydrate transport and metabolism	Molecular Function: phosphoglycerate mutase activity (GO:0004619);; Cellular Component: mitochondrial envelope (GO:0005740);; Cellular Component: cytosol (GO:0005829);; Cellular Component: plasma membrane (GO:0005886);; Biological Process: glycolysis (GO:0006096);; Biological Process: response to cold (GO:0009409);; Cellular Component: chloroplast (GO:0009507);; Cellular Component: cytoplasmic me…	K01834|0.0|vvi:100245007|putative 2,3-bisphosphoglycerate-independent phosphoglycerate mutase	2,3-bisphosphoglycerate-independent phosphoglycerate mutase OS=Ricinus communis PE=1 SV=2	PREDICTED: 2,3-bisphosphoglycerate-independent phosphoglycerate mutase isoform 1 [Vitis vinifera]
comp12010_c0	--	--	--	--	--	ACR8 [Zea mays]
comp17445_c0	[ET]	--	Molecular Function: extracellular ligand-gated ion channel activity (GO:0005230);; Biological Process: transport (GO:0006810);; Cellular Component: membrane (GO:0016020);; Biological Process: single-organism process (GO:0044699);; Biological Process: response to stimulus (GO:0050896);;	--	Glutamate receptor 2.9 OS=Arabidopsis thaliana GN=GLR2.9 PE=2 SV=1	PREDICTED: glutamate receptor 2.8-like [Vitis vinifera]
comp585_c0	--	--	Cellular Component: chromatin (GO:0000785);; Molecular Function: DNA binding (GO:0003677);; Molecular Function: chromatin binding (GO:0003682);; Molecular Function: sequence-specific DNA binding transcription factor activity (GO:0003700);; Biological Process: glucose catabolic process (GO:0006007);; Biological Process: chromatin assembly or disassembly (GO:0006333);; Biological Process: regulatio…	--	High mobility group B protein 1 OS=Arabidopsis thaliana GN=HMGB1 PE=1 SV=1	PREDICTED: high mobility group B protein 1-like [Vitis vinifera]
comp19785_c0	--	--	Biological Process: metabolic process (GO:0008152);; Cellular Component: cytoplasmic membrane-bounded vesicle (GO:0016023);; Molecular Function: oxidoreductase activity (GO:0016491);;	--	LRR receptor-like serine/threonine-protein kinase GSO1 OS=Arabidopsis thaliana GN=GSO1 PE=2 SV=1	predicted protein [Hordeum vulgare subsp. vulgare]
comp26943_c0	--	--	--	--	--	PREDICTED: uncharacterized protein LOC101267341 [Solanum lycopersicum]
comp7928_c0	[T]	Signal transduction mechanisms	Biological Process: response to stress (GO:0006950);;	--	Universal stress protein A-like protein OS=Arabidopsis thaliana GN=At3g01520 PE=1 SV=2	conserved hypothetical protein [Ricinus communis]
comp3743_c0	[RTKL]	--	Molecular Function: protein serine/threonine kinase activity (GO:0004674);; Molecular Function: protein tyrosine kinase activity (GO:0004713);; Molecular Function: ATP binding (GO:0005524);; Cellular Component: nucleus (GO:0005634);; Cellular Component: cytosol (GO:0005829);; Biological Process: response to brassinosteroid (GO:0009741);; Biological Process: protein autophosphorylation (GO:0046777…	--	Shaggy-related protein kinase theta OS=Arabidopsis thaliana GN=ASK8 PE=2 SV=3	Glycogen synthase kinase-3 beta, putative [Ricinus communis]
comp15842_c0	--	--	--	--	--	conserved hypothetical protein [Ricinus communis]
comp4393_c0	--	--	Molecular Function: cysteine-type endopeptidase activity (GO:0004197);; Biological Process: proteolysis (GO:0006508);; Biological Process: protein targeting to membrane (GO:0006612);; Biological Process: salicylic acid biosynthetic process (GO:0009697);; Biological Process: salicylic acid mediated signaling pathway (GO:0009863);; Biological Process: regulation of plant-type hypersensitive respons…	--	Metacaspase-1 OS=Arabidopsis thaliana GN=AMC1 PE=1 SV=1	PREDICTED: metacaspase-1-like [Vitis vinifera]
comp39053_c0	--	--	Biological Process: primary metabolic process (GO:0044238);; Biological Process: cellular macromolecule metabolic process (GO:0044260);; Molecular Function: organic cyclic compound binding (GO:0097159);; Molecular Function: heterocyclic compound binding (GO:1901363);;	--	Transposon TX1 uncharacterized 149 kDa protein OS=Xenopus laevis PE=4 SV=1	hypothetical protein VITISV_000114 [Vitis vinifera]
comp870_c0	[C]	Energy production and conversion	Cellular Component: mitochondrion (GO:0005739);; Biological Process: defense response (GO:0006952);; Biological Process: response to wounding (GO:0009611);; Biological Process: jasmonic acid biosynthetic process (GO:0009695);; Biological Process: response to salicylic acid (GO:0009751);; Molecular Function: FMN binding (GO:0010181);; Molecular Function: 12-oxophytodienoate reductase activity (GO:…	--	Putative 12-oxophytodienoate reductase 4 OS=Oryza sativa subsp. japonica GN=OPR4 PE=2 SV=1	RecName: Full=Putative 12-oxophytodienoate reductase 4; AltName: Full=OPDA-reductase 4; Short=OsOPR4
comp18355_c0	--	--	--	--	--	conserved hypothetical protein [Ricinus communis]
comp13684_c0	--	--	Molecular Function: catalytic activity (GO:0003824);; Molecular Function: binding (GO:0005488);;	--	--	hypothetical protein VITISV_030956 [Vitis vinifera]
comp28718_c0	--	--	Molecular Function: DNA binding (GO:0003677);; Molecular Function: chromatin binding (GO:0003682);; Molecular Function: sequence-specific DNA binding transcription factor activity (GO:0003700);; Cellular Component: nucleus (GO:0005634);; Biological Process: regulation of transcription, DNA-templated (GO:0006355);;	--	--	unnamed protein product [Vitis vinifera]
comp2265_c0	--	--	Cellular Component: cytosol (GO:0005829);; Cellular Component: plasmodesma (GO:0009506);; Biological Process: response to fungus (GO:0009620);; Biological Process: photomorphogenesis (GO:0009640);; Biological Process: response to auxin (GO:0009733);; Biological Process: unidimensional cell growth (GO:0009826);; Biological Process: auxin polar transport (GO:0009926);; Biological Process: lateral r…	K10691|0.0|ath:AT3G02260|BIG	Auxin transport protein BIG OS=Arabidopsis thaliana GN=BIG PE=1 SV=2	PREDICTED: LOW QUALITY PROTEIN: auxin transport protein BIG-like [Vitis vinifera]
comp8624_c0	--	--	Biological Process: floral whorl development (GO:0048438);; Biological Process: floral organ formation (GO:0048449);; Biological Process: phyllome development (GO:0048827);;	--	Uncharacterized serine-rich protein C215.13 OS=Schizosaccharomyces pombe (strain 972 / ATCC 24843) GN=SPBC215.13 PE=1 SV=1	PREDICTED: uncharacterized protein LOC101764587 [Setaria italica]
comp8471_c0	[QR]	--	Biological Process: 7-methylguanosine mRNA capping (GO:0006370);; Molecular Function: methyltransferase activity (GO:0008168);; Cellular Component: cytoplasmic membrane-bounded vesicle (GO:0016023);; Biological Process: methylation (GO:0032259);;	K00565|1e-136|vvi:100252253|hypothetical protein LOC100252253	mRNA cap guanine-N7 methyltransferase 2 OS=Oryza sativa subsp. japonica GN=Os02g0780600 PE=2 SV=1	S-adenosyl-L-methionine-dependent methyltransferases superfamily protein [Theobroma cacao]
comp17902_c0	[C]	Energy production and conversion	Molecular Function: ATP binding (GO:0005524);; Cellular Component: vacuolar membrane (GO:0005774);; Cellular Component: Golgi apparatus (GO:0005794);; Cellular Component: cytosol (GO:0005829);; Cellular Component: plasma membrane (GO:0005886);; Biological Process: gluconeogenesis (GO:0006094);; Biological Process: pentose-phosphate shunt (GO:0006098);; Cellular Component: plasmodesma (GO:0009506)…	K02147|5e-12|rcu:RCOM_0977310|ATP synthase subunit beta vacuolar, putative (EC:3.6.3.15)	V-type proton ATPase subunit B 2 (Fragment) OS=Gossypium hirsutum PE=2 SV=1	vacuolar H(+)-ATPase subunit B [Mesembryanthemum crystallinum, leaf, Peptide Partial, 170 aa]
comp5748_c0	--	--	--	--	E3 ubiquitin ligase BIG BROTHER-related OS=Arabidopsis thaliana GN=BBR PE=2 SV=1	PREDICTED: E3 ubiquitin ligase BIG BROTHER-related isoform 1 [Glycine max]
comp12963_c0	--	--	--	--	Methyltransferase-like protein 23 OS=Xenopus laevis GN=mettl23 PE=2 SV=1	hypothetical protein OsI_05627 [Oryza sativa Indica Group]
comp21774_c0	--	--	Cellular Component: endosome (GO:0005768);; Cellular Component: endoplasmic reticulum (GO:0005783);; Cellular Component: trans-Golgi network (GO:0005802);; Cellular Component: plasma membrane (GO:0005886);; Biological Process: response to cold (GO:0009409);; Biological Process: plant-type cell wall biogenesis (GO:0009832);; Molecular Function: cellulose synthase (UDP-forming) activity (GO:0016760…	--	Cellulose synthase-like protein D2 OS=Oryza sativa subsp. japonica GN=CSLD2 PE=2 SV=1	putative cellulose synthase 5-partial [Oryza sativa Japonica Group]
comp12983_c0	[J]	Translation, ribosomal structure and biogenesis	Molecular Function: translation initiation factor activity (GO:0003743);; Cellular Component: cell wall (GO:0005618);; Biological Process: translational initiation (GO:0006413);; Biological Process: aromatic amino acid family biosynthetic process (GO:0009073);; Cellular Component: chloroplast (GO:0009507);; Biological Process: embryo development ending in seed dormancy (GO:0009793);; Biological P…	K02520|9e-88|ath:AT4G30690|translation initiation factor 3 (IF-3) family protein	Translation initiation factor IF-3 OS=Synechococcus sp. (strain CC9902) GN=infC PE=3 SV=1	translation initiation factor IF-3 [Arabidopsis thaliana]
comp7455_c0	--	--	Cellular Component: vacuole (GO:0005773);; Biological Process: cellular protein metabolic process (GO:0044267);;	--	Ubiquitin-60S ribosomal protein L40 OS=Trypanosoma cruzi PE=2 SV=1	Ubiquitin [Medicago truncatula]
comp5666_c1	[K]	Transcription	Biological Process: RNA splicing, via endonucleolytic cleavage and ligation (GO:0000394);; Molecular Function: nucleic acid binding (GO:0003676);; Cellular Component: transcription factor TFIID complex (GO:0005669);; Biological Process: DNA-templated transcription, initiation (GO:0006352);; Biological Process: transcription from RNA polymerase II promoter (GO:0006366);; Biological Process: embryo…	K03133|4e-79|rcu:RCOM_0652310|protein with unknown function	Transcription initiation factor TFIID subunit 9 OS=Mus musculus GN=Taf9 PE=2 SV=1	PREDICTED: transcription initiation factor TFIID subunit 9-like isoform 1 [Solanum lycopersicum]
comp508_c0	[J]	Translation, ribosomal structure and biogenesis	Molecular Function: structural constituent of ribosome (GO:0003735);; Cellular Component: mitochondrion (GO:0005739);; Biological Process: translation (GO:0006412);; Cellular Component: cytosolic large ribosomal subunit (GO:0022625);;	K02929|1e-74|zma:100280597|60S ribosomal protein L44	60S ribosomal protein L36a OS=Arabidopsis thaliana GN=RPL36AA PE=2 SV=3	60S ribosomal protein L44 [Zea mays]
comp29119_c0	[O]	Posttranslational modification, protein turnover, chaperones	Biological Process: metabolic process (GO:0008152);; Molecular Function: serine-type peptidase activity (GO:0008236);; Cellular Component: cell part (GO:0044464);;	--	Subtilisin-like protease SDD1 OS=Arabidopsis thaliana GN=SDD1 PE=2 SV=1	hypothetical protein PRUPE_ppa002068mg [Prunus persica]
comp40656_c0	[M]	Cell wall/membrane/envelope biogenesis	--	--	Basic salivary proline-rich protein 3 OS=Homo sapiens GN=PRB3 PE=1 SV=2	GRAS family transcription factor [Theobroma cacao]
[truncated: 19,959 more rows]
