# Supplementary material for: Transcriptome analysis of colored calla lily (Zantedeschia rehmannii Engl.) by Illumina sequencing: de novo assembly, annotation and EST-SSR marker development
Source: PeerJ. 2016 Sep 1;4:e2378. doi: 10.7717/peerj.2378 (PMC5012260; doi:10.7717/peerj.2378)
Supplement: Table S3 [file peerj-04-2378-s004.xlsx]

## Sheet: Sheet1
Table S4 Unigenes related to flower development in colored calla lily
	No.	Query Seq_id	Length (bp)	E_value	Identity	Score	Sequence description	Homologous Species
Pigment biosynthesis pathway (61)	(1)	Anthocyanin biosynthesis pathway(52)
	1	PAL(3)
		comp1353_c0	gi|1171996|sp|P45729.1|PAL3_PETCR	0	513/713(71.95)	1013	RecName: Full=Phenylalanine ammonia-lyase 3	---
		comp15003_c0	gi|1172004|sp|P45735.1|PALY_VITVI	7.83491e-169	236/335(70.45)	484	RecName: Full=Phenylalanine ammonia-lyase	---
		comp30094_c0	gi|194740610|gb|ACF94719.1|	1.39296e-40	77/143(53.85)	140	phenylalanine ammonia lyase	Robinia pseudoacacia
		C4H (1)
		comp2011_c0	gi|9965897|gb|AAG10196.1|AF286647_1	0	448/505(88.71)	923	cinnamate-4-hydroxylase	Gossypium arboreum
	2	4CL (4)
		comp20720_c0	gi|112806952|dbj|BAF03072.1|	1.07676e-105	152/188(80.85)	307	4-coumarate:coenzyme A ligase	Solanum melongena
		comp11064_c0	gi|112806954|dbj|BAF03073.1|	1.33117e-63	96/130(73.85)	206	4-coumarate:coenzyme A ligase	Solanum melongena
		comp8852_c0	gi|358348013|ref|XP_003638044.1|	1.40232e-36	65/82(79.27)	132	4-coumarate-coa ligase	Medicago truncatula
		comp1501_c0	gi|381356180|gb|AFG26323.1|	0	422/532(79.32)	865	4-coumarate-CoA ligase	Cinnamomum osmophloeum
	3	CHI (3)
		comp25426_c0	gi|359493644|ref|XP_002283758.2|	8.0679e-97	151/211(71.56)	294	PREDICTED: chalcone--flavonone isomerase-like	Vitis vinifera
		comp3609_c0	gi|295687229|gb|ADG27840.1|	1.26723e-103	152/209(72.73)	308	chalcone isomerase	Gossypium hirsutum
		comp6758_c0	gi|508782804|gb|EOY30060.1|	1.03041e-137	216/402(53.73)	422	Chalcone-flavanone isomerase family protein isoform 1	Theobroma cacao
	4	F3H (1)
		comp10471_c0	gi|114107585|gb|ABI50233.1|	0	323/372(86.83)	657	flavanone 3-hydroxylase	Anthurium andraeanum
	5	F3'H (3)
		comp22006_c0	gi|255291814|dbj|BAH89259.1|	6.8906e-132	193/297(64.98)	389	putative flavonoid 3&apos;-hydroxylase	Diospyros kaki
		comp38906_c0	gi|223278295|dbj|BAH22519.1|	4.60055e-47	80/138(57.97)	164	flavonoid 3&apos; hydroxylase	Tricyrtis hirta
		comp40806_c0	gi|37694933|gb|AAR00230.1|	2.00926e-74	109/157(69.43)	231	flavonoid 3&apos;-hydroxylase	Ipomoea purpurea
	6	DFR (7)
		comp23946_c0	gi|301131126|gb|ADK62520.1|	1.79612e-52	93/160(58.13)	179	dihydroflavonol 4-reductase	Curcuma alismatifolia
		comp3190_c0	gi|508712421|gb|EOY04318.1|	1.78908e-179	246/346(71.10)	514	Bifunctional dihydroflavonol 4-reductase/flavanone 4-reductase isoform 1	Theobroma cacao
		comp3602_c0	gi|225457658|ref|XP_002275562.1|	5.5082e-124	175/246(71.14)	360	PREDICTED: bifunctional dihydroflavonol 4-reductase/flavanone 4-reductase	Vitis vinifera
		comp40458_c0	gi|523391777|dbj|BAN62761.1|	6.22147e-76	109/144(75.69)	236	dihydroflavonol 4-reductase	Tricyrtis sp. Shinonome
		comp4798_c0	gi|225453895|ref|XP_002278887.1|	1.13177e-104	166/345(48.12)	320	PREDICTED: dihydroflavonol-4-reductase	Vitis vinifera
		comp6769_c0	gi|225458585|ref|XP_002284636.1|	2.86113e-160	223/328(67.99)	460	PREDICTED: putative dihydroflavonol-4-reductase	Vitis vinifera
		comp9809_c0	gi|86285710|gb|ABC94578.1|	0	296/340(87.06)	606	dihydroflavonol 4-reductase	Anthurium andraeanum
	7	UFGT (15)
		comp24236_c0	gi|508712674|gb|EOY04571.1|	1.04091e-29	53/89(59.55)	116	UDP-glucosyltransferase 74F2, putative	Theobroma cacao
		comp2431_c1	gi|395132307|dbj|BAM29304.1|	3.99786e-145	205/333(61.56)	442	acyl-glucose-dependent anthocyanin 7-O-glucosyltransferase	Agapanthus africanus
		comp10938_c0	gi|395132307|dbj|BAM29304.1|	3.37219e-65	103/192(53.65)	219	acyl-glucose-dependent anthocyanin 7-O-glucosyltransferase	Agapanthus africanus
		comp27617_c0	gi|45155264|gb|AAS55083.1|	3.78268e-24	56/132(42.42)	101	UDP-glucose glucosyltransferase	Rhodiola sachalinensis
		comp2841_c0	gi|225447947|ref|XP_002268972.1|	0	1166/1637(71.23)	2311	PREDICTED: UDP-glucose:glycoprotein glucosyltransferase-like	Vitis vinifera
		comp28892_c0	gi|225458362|ref|XP_002281768.1|	3.8493e-32	70/140(50.00)	128	PREDICTED: anthocyanidin 3-O-glucosyltransferase 5	Vitis vinifera
		comp42123_c0	gi|255555263|ref|XP_002518668.1|	3.44552e-16	43/89(48.31)	78	UDP-glucosyltransferase, putative	Ricinus communis
		comp42961_c0	gi|508718009|gb|EOY09906.1|	8.42274e-44	84/192(43.75)	157	Anthocyanin 3&apos;-O-beta-glucosyltransferase, putative	Theobroma cacao
		comp12118_c0	gi|508718009|gb|EOY09906.1|	1.93023e-45	86/185(46.49)	161	Anthocyanin 3&apos;-O-beta-glucosyltransferase, putative	Theobroma cacao
		comp10139_c0	gi|255555341|ref|XP_002518707.1|	9.07502e-53	85/164(51.83)	179	UDP-glucosyltransferase, putative	Ricinus communis
		comp14784_c0	gi|357136058|ref|XP_003569623.1|	1.74097e-105	152/221(68.78)	317	PREDICTED: anthocyanidin 5,3-O-glucosyltransferase-like	Brachypodium distachyon
		comp15141_c0	gi|357122707|ref|XP_003563056.1|	2.44502e-09	28/46(60.87)	60	PREDICTED: anthocyanidin 5,3-O-glucosyltransferase-like	Brachypodium distachyon
		comp16783_c0	gi|508726050|gb|EOY17947.1|	4.84843e-36	65/106(61.32)	136	UDP-glucosyltransferase family 1 protein, putative	Theobroma cacao
		comp17446_c0	gi|255555265|ref|XP_002518669.1|	1.96933e-33	62/117(52.99)	131	UDP-glucosyltransferase, putative	Ricinus communis
		comp24236_c0	gi|508712674|gb|EOY04571.1|	1.04091e-29	53/89(59.55)	116	UDP-glucosyltransferase 74F2, putative	Theobroma cacao
	8	MT (4)
		comp34495_c0	gi|255568371|ref|XP_002525160.1|	6.64146e-57	102/226(45.13)	190	o-methyltransferase, putative	Ricinus communis
		comp37019_c0	gi|353441080|gb|AEQ94124.1|	1.54723e-38	68/100(68.00)	133	putative O-methyltransferase	Elaeis guineensis
		comp510_c2	gi|38047401|gb|AAR09603.1|	3.55947e-83	142/349(40.69)	263	O-methyltransferase	Mentha x piperita
		comp9029_c0	gi|146148669|gb|ABQ02272.1|	4.23379e-25	53/84(63.10)	108	O-methyltransferase	Vitis vinifera
	9	AT (1)
		comp15429_c0	gi|514777342|ref|XP_004968737.1|	0	404/600(67.33)	861	PREDICTED: acyltransferase-like protein At1g54570, chloroplastic-like	Setaria italica
	10	GST (10)
		comp614_c0	gi|118406886|gb|ABK81651.1|	1.57171e-30	52/71(73.24)	115	glutathione S-transferase	Vitis vinifera
		comp7475_c0	gi|460789891|gb|AGH14253.1|	2.32805e-60	100/205(48.78)	197	glutathione S-transferase	Musa acuminata AAA Group
		comp8913_c0	gi|460789895|gb|AGH14255.1|	1.40844e-35	64/81(79.01)	132	glutathione S-transferase	Musa acuminata AAA Group
		comp134_c0	gi|1170094|sp|P46423.1|GSTF_HYOMU	1.47291e-95	138/207(66.67)	290	RecName: Full=Glutathione S-transferase; AltName: Full=25 kDa auxin-binding protein; AltName: Full=GST class-phi	---
		comp13950_c0	gi|1170094|sp|P46423.1|GSTF_HYOMU	9.58534e-41	72/107(67.29)	147	RecName: Full=Glutathione S-transferase; AltName: Full=25 kDa auxin-binding protein; AltName: Full=GST class-phi	---
		comp10419_c0	gi|460789895|gb|AGH14255.1|	2.05517e-81	118/166(71.08)	251	glutathione S-transferase	Musa acuminata AAA Group
		comp1764_c0	gi|508780306|gb|EOY27562.1|	0	272/358(75.98)	575	Glutathione S-transferase family protein	Theobroma cacao
		comp197_c0	gi|460789895|gb|AGH14255.1|	8.96512e-103	150/211(71.09)	311	glutathione S-transferase	Musa acuminata AAA Group
		comp20426_c0	gi|225437288|ref|XP_002262842.1|	1.29287e-11	27/45(60.00)	65	PREDICTED: glutathione S-transferase	Vitis vinifera
		comp23432_c0	gi|225459777|ref|XP_002285906.1|	7.20709e-46	80/137(58.39)	158	PREDICTED: glutathione S-transferase PARB	Vitis vinifera
	(2)	Carotenoid biosynthesis pathway(9)
	1	PSY (2)
		comp309_c0	gi|379139039|gb|AFC95818.1|	0	336/427(78.69)	663	phytoene synthase	Narcissus tazetta var. chinensis
		comp7133_c0	gi|238836224|gb|ACR61392.1|	0	299/394(75.89)	584	phytoene synthase protein	Fragaria x ananassa
	2	PDS (2)
		comp26859_c0	gi|308731387|dbj|BAJ22965.1|	8.46e-09	26/29(89.66)	54	phytoene desaturase	Lotus japonicus
		comp24031_c0	gi|508701224|gb|EOX93120.1|	8.93e-39	65/84(77.38)	142	Phytoene desaturation 1 isoform 3	Theobroma cacao
	3	ZDS (1)
		comp1249_c0	gi|383831954|gb|AFH53814.1|	0	247/294(84.01)	500	zeta-carotene desaturase	Narcissus tazetta var. chinensis
	4	LCYB (1)
		comp7985_c0	gi|225441311|ref|XP_002275769.1|	0	407/505(80.59)	821	PREDICTED: lycopene beta cyclase, chloroplastic	Vitis vinifera
	5	ZEP (1)
		comp11924_c0	gi|359497021|ref|XP_002265622.2|	7.9e-163	221/316(69.94)	477	PREDICTED: zeaxanthin epoxidase, chloroplastic-like	Vitis vinifera
	6	NCED (2)
		comp38521_c0	gi|508778087|gb|EOY25343.1|	2.43e-69	117/237(49.37)	231	Nine-cis-epoxycarotenoid dioxygenase 4	Theobroma cacao
		comp15990_c0	gi|334361424|gb|AEG78287.1|	3.47e-176	250/360(69.44)	514	9-cis-epoxycarotenoid dioxygenase	Gladiolus hybrid cultivar
Floral organ identity (26)	1	AP2 (11)
		comp21783_c0	gi|526117878|ref|NP_001267881.1|	5.9e-32	97/210(46.19)	130	transcription factor APETALA2	Vitis vinifera
		comp12254_c0	gi|255587797|ref|XP_002534399.1|	1.84e-121	222/389(57.07)	375	Floral homeotic protein APETALA2, putative	Ricinus communis
		comp2914_c0	gi|514750833|ref|XP_004962201.1|	1.35e-125	209/406(51.48)	380	PREDICTED: AP2-like ethylene-responsive transcription factor At2g41710-like	Setaria italica
		comp4137_c2	gi|506954114|gb|AGM20693.1|	2.21e-132	224/358(62.57)	414	AP2-1	Populus tomentosa
		comp4909_c0	gi|414884051|tpg|DAA60065.1|	7.01e-06	35/84(41.67)	51	TPA: putative AP2/EREBP transcription factor superfamily protein	Zea mays
		comp5428_c0	gi|224074205|ref|XP_002304300.1|	6.23e-16	32/42(76.19)	77	AP2/ERF domain-containing transcription factor	Populus trichocarpa
		comp6100_c0	gi|476001811|gb|AGI62047.1|	1.47e-09	33/68(48.53)	66	AP2-11	Erycina pusilla
		comp12996_c0	gi|508699374|gb|EOX91270.1|	5.64e-15	74/300(24.67)	84	AP2/B3-like transcriptional factor family protein, putative	Theobroma cacao
		comp14918_c0	gi|224075453|ref|XP_002304640.1|	7.22e-24	62/139(44.60)	100	AP2/ERF domain-containing transcription factor	Populus trichocarpa
		comp16186_c0	gi|508711020|gb|EOY02917.1|	4.83e-17	27/45(60.00)	70	AP2/B3-like transcriptional factor family protein isoform 1	Theobroma cacao
		comp1694_c1	gi|224128256|ref|XP_002329119.1|	8.12e-56	131/256(51.17)	189	AP2/ERF domain-containing transcription factor	Populus trichocarpa
		comp19786_c0	gi|225443245|ref|XP_002272159.1|	3.57e-159	242/359(67.41)	462	PREDICTED: AP2-like ethylene-responsive transcription factor At1g16060-like	Vitis vinifera
	2	FUL(1)
		comp5847_c0	gi|371926958|gb|AEX58637.1|	2.26e-76	90/111(81.08)	181	FUL-like protein [Epimedium sagittatum]
	3	PI (2)
		comp4510_c0	gi|66802017|gb|AAY56582.1|	5.34e-102	141/175(80.57)	300	PISTILLATA-like protein	Arum maculatum
		comp32026_c0	gi|66802017|gb|AAY56582.1|	1.68e-41	72/119(60.50)	144	PISTILLATA-like protein	Arum maculatum
	4	AG (1)
		comp2124_c0	gi|89152256|gb|ABD62864.1|	2.9e-96	147/226(65.04)	294	AG.1	Persea americana
	5	AGL (2)
		comp4966_c0	gi|6635740|gb|AAF19968.1|AF207699_1	9.89e-59	112/203(55.17)	192	agamous-like MADS box protein OPMADS1	Elaeis guineensis
		comp15483_c0	gi|334187967|ref|NP_001190406.1|	1.93e-73	95/130(73.08)	203	protein agamous-like 26	Arabidopsis thaliana
	6	SEP (1)
		comp4530_c0	gi|290465691|gb|ADD25190.1|	8.54e-68	122/195(62.56)	216	2016-09-01	Nelumbo nucifera
	7	SPT (2)
		comp2789_c0	gi|359481576|ref|XP_002278416.2|	0	1140/1782(63.97)	2179	PREDICTED: transcription elongation factor SPT6-like	Vitis vinifera
		comp5667_c0	gi|226510456|ref|NP_001150575.1|	2.91e-74	106/123(86.18)	229	transcription elongation factor SPT4	Zea mays
	8	MADS 6)
		comp6606_c0	gi|225423656|ref|XP_002276139.1|	3.98e-62	123/244(50.41)	207	PREDICTED: MADS-box protein FBP24-like	Vitis vinifera
		comp8476_c0	gi|508775252|gb|EOY22508.1|	2.91e-59	87/146(59.59)	191	K-box region and MADS-box transcription factor family protein isoform 2	Theobroma cacao
		comp1418_c0	gi|300078688|gb|ADJ67241.1|	1.02e-53	99/161(61.49)	188	MADS box transcription factor 11	Oncidium hybrid cultivar
		comp1483_c0	gi|397529498|dbj|BAM34481.1|	3.93e-95	157/221(71.04)	286	MADS-box transcription factor	Alstroemeria ligtu subsp. Ligtu
		comp18018_c0	gi|260780012|gb|ACX50635.1|	2.06e-82	126/219(57.53)	253	MADS-box transcription factor	Guzmania wittmackii x Guzmania lingulata
		comp4181_c0	gi|16549058|dbj|BAB70736.1|	3.08e-96	153/214(71.50)	291	putative MADS-domain transcription factor MpMADS1	Magnolia praecocissima
Flowering regulation pathways (53)	(1)	Photoperiod pathway (22)
	1	PHY (4)
		comp12245_c0	gi|189409278|gb|ACC60970.1|	0	883/1110(79.55)	1800	phytochrome B	Vitis riparia
		comp9219_c0	gi|183239026|gb|ACC60971.1|	0	753/1018(73.97)	1556	phytochrome C	Vitis riparia
		comp15031_c0	gi|258677127|gb|ACV87354.1|	2.67e-114	175/253(69.17)	363	phytochrome B	Aquilegia formosa
		comp19367_c0	gi|309256335|gb|ADO60995.1|	1.08e-165	238/288(82.64)	481	phytochrome b	Helianthus annuus
	2	CRY (2)
		comp4421_c0	gi|359477655|ref|XP_002285169.2|	0	421/614(68.57)	867	PREDICTED: cryptochrome-2-like	Vitis vinifera
		comp904_c0	gi|508724100|gb|EOY15997.1|	0	519/679(76.44)	1065	CRY1 isoform 1	Theobroma cacao
	3	LHY (2)
		comp6387_c0	gi|225453650|ref|XP_002267720.1|	8.49e-155	276/591(46.70)	464	PREDICTED: protein LHY-like	Vitis vinifera
		comp17065_c0	gi|225453650|ref|XP_002267720.1|	0	359/787(45.62)	549	PREDICTED: protein LHY-like	Vitis vinifera
	4	ELF (2)
		comp5349_c0	gi|225444780|ref|XP_002279914.1|	2.2e-59	95/112(84.82)	192	PREDICTED: protein ELF4-LIKE 4	Vitis vinifera
		comp8121_c0	gi|508779969|gb|EOY27225.1|	5.17e-37	78/116(67.24)	133	ELF4-like 4	Theobroma cacao
	5	GI (1)
		comp2750_c0	gi|326415778|gb|ADZ72836.1|	8.43e-66	122/194(62.89)	220	GIGANTEA-like protein	Aquilegia formosa
	6	CO(6)
		comp4010_c0	gi|225423977|ref|XP_002282578.1|	2e-122	246/506(48.62)	377	PREDICTED: zinc finger protein CONSTANS-LIKE 16	Vitis vinifera
		comp4197_c0	gi|225425158|ref|XP_002263613.1|	5.31e-128	229/518(44.21)	394	PREDICTED: zinc finger protein CONSTANS-LIKE 14-like	Vitis vinifera
		comp5117_c1	gi|359495608|ref|XP_002265377.2|	7.23e-140	230/421(54.63)	431	PREDICTED: zinc finger protein CONSTANS-LIKE 10	Vitis vinifera
		comp8958_c0	gi|502150148|ref|XP_004507812.1|	2.26e-75	114/245(46.53)	198	PREDICTED: zinc finger protein CONSTANS-LIKE 5-like isoform X1	Cicer arietinum
		comp13851_c0	gi|315377430|gb|ADU05552.1|	3.02e-09	30/42(71.43)	59	CONSTANS-like protein	Dendrobium loddigesii
		comp14705_c0	gi|225430571|ref|XP_002263458.1|	4.15e-74	146/271(53.87)	234	PREDICTED: zinc finger protein CONSTANS-LIKE 4-like	Vitis vinifera
	7	FT (1)
		comp24898_c0	gi|333827685|gb|AEG19545.1|	4.09e-71	101/123(82.11)	216	flowering locus T-like protein	Vitis labrusca x Vitis vinifera
	8	COP1 (2)
		comp34291_c0	gi|470147220|ref|XP_004309213.1|	1.67e-64	99/156(63.46)	207	PREDICTED: E3 ubiquitin-protein ligase COP1-like	Fragaria vesca subsp. Vesca
		comp8210_c0	gi|359483452|ref|XP_002270330.2|	0	536/704(76.14)	1075	PREDICTED: E3 ubiquitin-protein ligase COP1-like	Vitis vinifera
	9	FHY3 (2)
		comp33297_c0	gi|225464803|ref|XP_002268503.1|	6.46e-16	41/107(38.32)	64	PREDICTED: protein FAR-RED ELONGATED HYPOCOTYL 3-like	Vitis vinifera
	(2)	Vernalization pathway (11)
	1	FLC (1)
		comp17271_c0	gi|526117565|ref|NP_001268057.1|	6.15e-33	70/184(38.04)	129	flowering locus C	Vitis vinifera
	2	FRI (6)
		comp2250_c0	gi|508720250|gb|EOY12147.1|	6.13e-111	229/601(38.10)	351	FRIGIDA like 1, putative	Theobroma cacao
		comp5034_c0	gi|359480593|ref|XP_002283930.2|	1.43e-146	237/406(58.37)	449	PREDICTED: protein FRIGIDA-like isoform 2	Vitis vinifera
		comp6116_c0	gi|255567947|ref|XP_002524951.1|	8.41e-37	92/231(39.83)	144	Protein FRIGIDA, putative	Ricinus communis
		comp6136_c0	gi|326415774|gb|ADZ72834.1|	7.83e-89	208/628(33.12)	302	FRIGIDA-like protein	Aquilegia formosa
		comp1008_c0	gi|508701793|gb|EOX93689.1|	0	338/557(60.68)	622	FRIGIDA-like protein isoform 1	Theobroma cacao
		comp1326_c0	gi|225432666|ref|XP_002282465.1|	0	322/535(60.19)	634	PREDICTED: protein FRIGIDA-like	Vitis vinifera
	3	VRN (1)
		comp12160_c0	gi|258649687|gb|ACV86625.1|	2.75e-12	30/34(88.24)	63	vernalization protein	Triticum timopheevii subsp. Armeniacum
	4	VIN (3)
		comp5212_c0	gi|225446034|ref|XP_002270335.1|	0	393/756(51.98)	729	PREDICTED: protein VERNALIZATION INSENSITIVE 3-like	Vitis vinifera
		comp8954_c0	gi|225446034|ref|XP_002270335.1|	0	373/747(49.93)	661	PREDICTED: protein VERNALIZATION INSENSITIVE 3-like	Vitis vinifera
		comp13833_c0	gi|225459073|ref|XP_002283776.1|	0	331/644(51.40)	605	PREDICTED: protein VERNALIZATION INSENSITIVE 3-like	Vitis vinifera
	(3)	Gibberellic acid pathway (11)
	1	GA (6)
		comp11175_c0	gi|224078978|ref|XP_002305704.1|	8.53e-33	60/108(55.56)	123	gibberellin 2-oxidase	Populus trichocarpa
		comp18497_c0	gi|405779216|gb|AFS18537.1|	9.22e-143	203/320(63.44)	416	gibberellin 3-oxidase	Pyrus communis
		comp19316_c0	gi|157683559|gb|ABV64511.1|	3.61e-172	248/366(67.76)	500	gibberellin 20 oxidase	Dasypyrum villosum
		comp25646_c0	gi|255555559|ref|XP_002518816.1|	3.56e-74	123/213(57.75)	235	gibberellin 20-oxidase, putative	Ricinus communis
		comp3693_c0	gi|225442747|ref|XP_002284968.1|	1.17e-85	138/301(45.85)	271	PREDICTED: gibberellin 20 oxidase 3	Vitis vinifera
		comp3782_c0	gi|470108023|ref|XP_004290335.1|	1.46e-118	122/201(60.70)	265	PREDICTED: gibberellin 20 oxidase 1-like	Fragaria vesca subsp. Vesca
	2	GAI (1)
		comp12194_c0	gi|66816781|gb|AAY56754.1|	2.76e-110	226/558(40.50)	350	DELLA protein	Malus domestica
	3	GID (3)
		comp4329_c0	gi|225346677|gb|ACN86360.1|	0	265/352(75.28)	556	GID1-5	Gossypium hirsutum
		comp31626_c0	gi|225436847|ref|XP_002271700.1|	8.92e-16	44/133(33.08)	77	PREDICTED: gibberellin receptor GID1B	Vitis vinifera
		comp34665_c0	gi|225346677|gb|ACN86360.1|	2.97e-15	34/51(66.67)	65	GID1-5	Gossypium hirsutum
	4	MYB (1)
		comp20978_c0	gi|110931822|gb|ABH02910.1|	1.46e-82	117/157(74.52)	248	MYB transcription factor MYB65	Glycine max
	(4)	Autonomous or other pathways (9)
	1	FCA (1)
		comp5088_c0	gi|359477208|ref|XP_002279515.2|	0	403/671(60.06)	728	PREDICTED: flowering time control protein FCA	Vitis vinifera
	2	FVE (2)
		comp8660_c0	gi|332806931|gb|AEF01212.1|	9.48e-138	182/215(84.65)	405	FVE	x Doritaenopsis hybrid cultivar
		comp3384_c0	gi|332806931|gb|AEF01212.1|	0	364/432(84.26)	772	FVE	x Doritaenopsis hybrid cultivar
	3	FY (1)
		comp9753_c0	gi|359495038|ref|XP_002267704.2|	0	336/486(69.14)	679	PREDICTED: flowering time control protein FY-like	Vitis vinifera
	4	SPL (2)
		comp13354_c0	gi|508698801|gb|EOX90697.1|	3.64e-15	34/42(80.95)	78	Squamosa promoter-binding protein-like 12	Theobroma cacao
		comp16821_c0	gi|473826749|gb|EMS47142.1|	1.79e-59	109/212(51.42)	198	Squamosa promoter-binding-like protein 10	Triticum urartu
	5	EMF2 (3)
		comp42168_c0	gi|474128115|gb|EMS56299.1|	3.51e-16	27/52(51.92)	57	Polycomb group protein EMBRYONIC FLOWER 2	Triticum urartu
		comp8847_c0	gi|90102224|gb|ABD85300.1|	0	438/712(61.52)	846	embryonic flower 2	Yucca filamentosa
		comp37478_c0	gi|474128115|gb|EMS56299.1|	6.94e-10	23/47(48.94)	55	Polycomb group protein EMBRYONIC FLOWER 2	Triticum urartu
Ethylene biosynthesis pathway (31)	1	ACC (9)
		comp190_c0	gi|343794776|gb|AEM62884.1|	9.65e-175	239/310(77.10)	498	ACC oxidase 5	Actinidia deliciosa
		comp10506_c0	gi|508777281|gb|EOY24537.1|	0	330/498(66.27)	681	ACC synthase 10 isoform 1	Theobroma cacao
		comp279_c0	gi|398994|sp|P31237.1|ACCO_ACTDE	1.04e-115	166/305(54.43)	345	RecName: Full=1-aminocyclopropane-1-carboxylate oxidase; Short=ACC oxidase; AltName: Full=Ethylene-forming enzyme; Short=EFE	---
		comp5462_c0	gi|225424360|ref|XP_002284896.1|	1.41e-136	206/393(52.42)	406	PREDICTED: 1-aminocyclopropane-1-carboxylate oxidase homolog 4-like	Vitis vinifera
		comp6124_c0	gi|225433017|ref|XP_002284642.1|	2.59e-114	155/215(72.09)	340	PREDICTED: 1-aminocyclopropane-1-carboxylate oxidase homolog 1	Vitis vinifera
		comp6438_c0	gi|1326182|gb|AAB00556.1|	1.02e-79	122/137(89.05)	247	1-aminocyclopropane-1-carboxylate oxidase	Musa acuminata AAA Group
		comp9517_c0	gi|511513550|gb|AGN74918.1|	1.85e-101	141/183(77.05)	302	1-aminocyclopropane-1-carboxylate oxidase	Morus alba
		comp20365_c0	gi|357513003|ref|XP_003626790.1|	8.99e-22	48/83(57.83)	96	1-aminocyclopropane-1-carboxylate oxidase-like protein	Medicago truncatula
		comp22919_c0	gi|225459657|ref|XP_002285881.1|	8.95e-160	227/323(70.28)	455	PREDICTED: 1-aminocyclopropane-1-carboxylate oxidase 5	Vitis vinifera
	2	ACS (2)
		comp45868_c0	gi|508783206|gb|EOY30462.1|	3.87e-07	31/98(31.63)	53	Acyl-CoA synthetase family member 4, putative	Theobroma cacao
		comp8336_c0	gi|225463846|ref|XP_002265371.1|	0	242/538(44.98)	419	PREDICTED: acyl-CoA synthetase family member 4	Vitis vinifera
	3	SAMs (4)
		comp1119_c0	gi|403327857|gb|AFR41302.1|	9.51e-87	120/124(96.77)	254	S-adenosylmethionine synthetase, partial	Populus fremontii
		comp34023_c0	gi|156752607|gb|ABU94049.1|	1.2e-82	116/119(97.48)	245	S-adenosylmethionine synthetase	Pinus sylvestris
		comp95_c0	gi|75306070|sp|Q944U4.1|METK_DENCR	0	373/393(94.91)	778	RecName: Full=S-adenosylmethionine synthase; Short=AdoMet synthase; AltName: Full=Methionine adenosyltransferase; Short=MAT	---
		comp5486_c0	gi|508715120|gb|EOY07017.1|	0	315/354(88.98)	643	Radical SAM superfamily protein	Theobroma cacao
	4	EIL (5)
		comp3691_c0	gi|225465369|ref|XP_002276380.1|	5.31e-86	174/381(45.67)	280	PREDICTED: protein ETHYLENE INSENSITIVE 3-like	Vitis vinifera
		comp11580_c0	gi|10241607|emb|CAC09582.1|	0	324/613(52.85)	611	ethylene insensitive (EIN3/EIL)-like transcription regulator	Fagus sylvatica
		comp5402_c0	gi|110735060|gb|ABG89100.1|	5.19e-95	128/144(88.89)	288	ethylene insensitive-like protein 1, partial	Musa acuminata
		comp639_c0	gi|110735066|gb|ABG89103.1|	0	368/641(57.41)	721	ethylene insensitive-like protein 4	Musa acuminata
		comp6373_c0	gi|225440009|ref|XP_002276399.1|	0	617/1313(46.99)	1068	PREDICTED: ethylene-insensitive protein 2-like	Vitis vinifera
	5	ERF (9)
		comp1605_c0	gi|60459253|gb|AAX20013.1|	1.87e-40	74/131(56.49)	144	putative ethylene responsive element binding protein	Gossypium hirsutum
		comp10850_c0	gi|449446199|ref|XP_004140859.1|	5.51e-28	73/156(46.79)	118	PREDICTED: ethylene-responsive transcription factor ERF118-like	Cucumis sativus
		comp26575_c0	gi|359492745|ref|XP_003634463.1|	5.45e-41	70/101(69.31)	140	PREDICTED: ethylene-responsive transcription factor ERF012-like	Vitis vinifera
		comp36600_c0	gi|514715810|ref|XP_004953340.1|	3.76e-09	36/75(48.00)	58	PREDICTED: ethylene-responsive transcription factor ERF034-like	Setaria italica
		comp11590_c0	gi|449446199|ref|XP_004140859.1|	3.39e-34	85/196(43.37)	138	PREDICTED: ethylene-responsive transcription factor ERF118-like	Cucumis sativus
		comp427_c0	gi|399146696|gb|AFP25470.1|	1.53e-120	209/378(55.29)	374	ERF3	Musa acuminata AAA Group
		comp10150_c0	gi|459021321|gb|AGG39692.1|	5.38e-82	155/340(45.59)	265	ERF transcription factor ERF1	Camellia sinensis
		comp18680_c0	gi|449464092|ref|XP_004149763.1|	2.94e-47	101/191(52.88)	163	PREDICTED: ethylene-responsive transcription factor ERF061-like	Cucumis sativus
		comp20861_c0	gi|359484256|ref|XP_002276572.2|	9.09e-46	102/207(49.28)	159	PREDICTED: ethylene-responsive transcription factor ERF017-like	Vitis vinifera
	6	ETR (2)
		comp20272_c0	gi|156467293|gb|ABU68268.1|	3.41e-21	39/44(88.64)	86	putative ethylene receptor	Prunus salicina
		comp11145_c0	gi|47716316|dbj|BAD20704.1|	0	420/538(78.07)	828	ethylene receptor	Gladiolus hybrid cultivar
