# Supplementary material for: Transcriptome analysis of colored calla lily (Zantedeschia rehmannii Engl.) by Illumina sequencing: de novo assembly, annotation and EST-SSR marker development
Source: PeerJ. 2016 Sep 1;4:e2378. doi: 10.7717/peerj.2378 (PMC5012260; doi:10.7717/peerj.2378)
Supplement: Table S4 [file peerj-04-2378-s005.xlsx]

## Sheet: sheet 1
Table S5 The output of EST-SSRs identified from the unigenes of colored calla lily‘Rehmannii’.
ID	SSR nr.	SSR type	SSR	size	start	end	COG_class	COG_class_annotation	GO_annotation	KEGG_annotation	Swissprot_annotation	nr_annotation
comp1_c0	1	p3	(GCG)5	15	336	350	--	--	--	--	BTB/POZ domain-containing protein At5g66560 OS=Arabidopsis thaliana GN=At5g66560 PE=2 SV=2	Cytochrome P450 likeTBP [Medicago truncatula]
comp10_c0	1	p1	(A)11	11	813	823	--	--	--	--	CYC02 protein OS=Catharanthus roseus GN=CYC02 PE=2 SV=1	RecName: Full=CYC02 protein
comp100_c0	1	p1	(A)12	12	651	662	[R]	General function prediction only	Molecular Function: catalytic activity (GO:0003824);; Biological Process: metabolic process (GO:0008152);; Cellular Component: plastid (GO:0009536);; Molecular Function: adenyl nucleotide binding (GO:0030554);;	--	Inosine-5&apos;-monophosphate dehydrogenase OS=Halobacterium salinarum (strain ATCC 700922 / JCM 11081 / NRC-1) GN=guaB PE=3 SV=2	OSIGBa0147B06.5 [Oryza sativa Indica Group]
comp1000_c0	1	p2	(AG)8	16	3673	3688	[S]	Function unknown	Cellular Component: plasma membrane (GO:0005886);; Cellular Component: cytoplasmic membrane-bounded vesicle (GO:0016023);;	--	Uncharacterized membrane protein C2G11.09 OS=Schizosaccharomyces pombe (strain 972 / ATCC 24843) GN=SPAC2G11.09 PE=3 SV=2	hypothetical protein PRUPE_ppa001757mg [Prunus persica]
comp10002_c0	1	p2	(AG)9	18	372	389	[R]	General function prediction only	Biological Process: mitotic cell cycle (GO:0000278);; Cellular Component: cytosol (GO:0005829);; Biological Process: RNA processing (GO:0006396);; Biological Process: chromosome segregation (GO:0007059);; Biological Process: synapsis (GO:0007129);; Biological Process: reciprocal meiotic recombination (GO:0007131);; Molecular Function: ferredoxin hydrogenase activity (GO:0008901);; Biological Proc…	--	Cytosolic Fe-S cluster assembly factor narfl OS=Xenopus tropicalis GN=narfl PE=2 SV=1	PREDICTED: cytosolic Fe-S cluster assembly factor NARFL-like [Vitis vinifera]
comp10005_c0	1	p2	(TG)9	18	611	628	--	--	Molecular Function: nucleic acid binding (GO:0003676);; Biological Process: DNA metabolic process (GO:0006259);; Biological Process: transport (GO:0006810);; Molecular Function: metal ion binding (GO:0046872);;	--	--	retrotransposon protein, putative, Ty3-gypsy subclass [Oryza sativa Japonica Group]
comp10006_c0	1	p1	(T)11	11	575	585	[RTKL]	--	Molecular Function: endoribonuclease activity (GO:0004521);; Molecular Function: protein serine/threonine kinase activity (GO:0004674);; Molecular Function: ATP binding (GO:0005524);; Cellular Component: nucleus (GO:0005634);; Cellular Component: cytoplasm (GO:0005737);; Biological Process: protein autophosphorylation (GO:0046777);;	--	Casein kinase I isoform delta (Fragment) OS=Oryctolagus cuniculus GN=CSNK1D PE=1 SV=1	Os01g0708400 [Oryza sativa Japonica Group]
comp10009_c0	1	p2	(GA)7	14	1	14	--	--	Cellular Component: mitochondrion (GO:0005739);;	--	--	hypothetical protein OsI_37946 [Oryza sativa Indica Group]
comp1001_c0	1	p2	(TA)7	14	145	158	--	--	Biological Process: carbohydrate biosynthetic process (GO:0016051);; Molecular Function: polygalacturonate 4-alpha-galacturonosyltransferase activity (GO:0047262);;	--	Elicitor-responsive protein 3 OS=Oryza sativa subsp. japonica GN=ERG3 PE=2 SV=1	Os04g0531100 [Oryza sativa Japonica Group]
comp10018_c0	1	p2	(TC)10	20	1	20	--	--	--	K14300|0.0|vvi:100249432|hypothetical protein LOC100249432	Nuclear pore complex protein Nup133 OS=Mus musculus GN=Nup133 PE=1 SV=2	PREDICTED: uncharacterized protein LOC100249432 isoform 1 [Vitis vinifera]
comp10020_c0	1	c	(TC)7t(A)10	25	2040	2064	--	--	Molecular Function: hydrolase activity, hydrolyzing O-glycosyl compounds (GO:0004553);; Biological Process: carbohydrate metabolic process (GO:0005975);; Cellular Component: cytoplasmic membrane-bounded vesicle (GO:0016023);; Molecular Function: acid-amino acid ligase activity (GO:0016881);; Molecular Function: cation binding (GO:0043169);; Cellular Component: anchored component of plasma membran…	--	Glucan endo-1,3-beta-glucosidase 4 OS=Arabidopsis thaliana GN=At3g13560 PE=1 SV=1	TPA: putative O-Glycosyl hydrolase superfamily protein isoform 1 [Zea mays]
comp10021_c0	1	p3	(CTC)6	18	128	145	--	--	--	--	Serine/threonine-protein kinase fray2 OS=Dictyostelium discoideum GN=fray2 PE=3 SV=1	hypothetical protein PRUPE_ppa007499mg [Prunus persica]
comp10027_c0	1	p1	(T)10	10	680	689	#N/A	#N/A	#N/A	#N/A	#N/A	#N/A
comp10032_c0	1	p1	(T)10	10	1104	1113	--	--	Cellular Component: chloroplast thylakoid membrane (GO:0009535);; Biological Process: chloroplast relocation (GO:0009902);; Biological Process: leaf morphogenesis (GO:0009965);; Biological Process: thylakoid membrane organization (GO:0010027);; Biological Process: carotenoid biosynthetic process (GO:0016117);; Biological Process: cell differentiation (GO:0030154);; Biological Process: ncRNA metab…	--	--	PREDICTED: uncharacterized protein LOC101215285 [Cucumis sativus]
comp10033_c0	1	p1	(A)13	13	283	295	[S]	Function unknown	Cellular Component: mitochondrion (GO:0005739);; Cellular Component: chloroplast envelope (GO:0009941);;	--	Basic proline-rich protein OS=Sus scrofa PE=1 SV=2	hypothetical protein PRUPE_ppa020908mg [Prunus persica]
comp10035_c0	1	p2	(GA)7	14	833	846	#N/A	#N/A	#N/A	#N/A	#N/A	#N/A
comp10039_c0	1	p1	(T)13	13	1886	1898	--	--	Biological Process: cell cycle checkpoint (GO:0000075);; Biological Process: DNA repair (GO:0006281);;	--	Cell cycle checkpoint control protein RAD9A OS=Homo sapiens GN=RAD9A PE=1 SV=1	PREDICTED: cell cycle checkpoint control protein RAD9A [Vitis vinifera]
comp10041_c0	1	p1	(A)10	10	615	624	--	--	Molecular Function: nucleotide binding (GO:0000166);; Cellular Component: cytosol (GO:0005829);; Molecular Function: kinase activity (GO:0016301);; Biological Process: phosphorylation (GO:0016310);; Cellular Component: Cul4-RING ubiquitin ligase complex (GO:0080008);;	--	Serine-threonine kinase receptor-associated protein OS=Rattus norvegicus GN=Strap PE=1 SV=1	unknown [Lotus japonicus]
comp10044_c0	1	p2	(TC)9	18	1740	1757	[O]	Posttranslational modification, protein turnover, chaperones	Molecular Function: cytochrome-c oxidase activity (GO:0004129);; Cellular Component: mitochondrial respiratory chain complex IV (GO:0005751);; Biological Process: mitochondrial electron transport, cytochrome c to oxygen (GO:0006123);; Biological Process: protein complex assembly (GO:0006461);; Biological Process: heme a biosynthetic process (GO:0006784);; Biological Process: aerobic respiration (…	K02259|0.0|osa:4345926|Os08g0496000	Cytochrome c oxidase assembly protein COX15 OS=Arabidopsis thaliana GN=COX15 PE=2 SV=1	hypothetical protein OsI_29735 [Oryza sativa Indica Group]
comp10046_c0	1	p2	(CT)9	18	1	18	[GEPR]	--	Molecular Function: transporter activity (GO:0005215);; Biological Process: transport (GO:0006810);; Biological Process: circadian rhythm (GO:0007623);; Biological Process: response to cold (GO:0009409);; Biological Process: response to water deprivation (GO:0009414);; Biological Process: response to abscisic acid (GO:0009737);; Cellular Component: membrane (GO:0016020);;	--	Probable folate-biopterin transporter 7 OS=Arabidopsis thaliana GN=At1g64890 PE=2 SV=1	transporter, putative [Ricinus communis]
comp10046_c0	2	p3	(CTC)5	15	526	540	[GEPR]	--	Molecular Function: transporter activity (GO:0005215);; Biological Process: transport (GO:0006810);; Biological Process: circadian rhythm (GO:0007623);; Biological Process: response to cold (GO:0009409);; Biological Process: response to water deprivation (GO:0009414);; Biological Process: response to abscisic acid (GO:0009737);; Cellular Component: membrane (GO:0016020);;	--	Probable folate-biopterin transporter 7 OS=Arabidopsis thaliana GN=At1g64890 PE=2 SV=1	transporter, putative [Ricinus communis]
comp10056_c0	1	p3	(GCC)5	15	1515	1529	[O]	Posttranslational modification, protein turnover, chaperones	Biological Process: protein peptidyl-prolyl isomerization (GO:0000413);; Molecular Function: peptidyl-prolyl cis-trans isomerase activity (GO:0003755);; Cellular Component: cytosol (GO:0005829);; Biological Process: protein folding (GO:0006457);; Biological Process: vegetative phase change (GO:0010050);; Biological Process: floral meristem determinacy (GO:0010582);;	K05864|0.0|sbi:SORBI_10g007410|hypothetical protein	Peptidyl-prolyl cis-trans isomerase CYP40 OS=Arabidopsis thaliana GN=CYP40 PE=2 SV=1	PREDICTED: peptidyl-prolyl cis-trans isomerase CYP40-like [Setaria italica]
comp10059_c0	1	p2	(TC)6	12	71	82	--	--	--	--	DNA-directed RNA polymerase III subunit RPC4 OS=Mus musculus GN=Polr3d PE=2 SV=2	PREDICTED: uncharacterized protein LOC100256088 [Vitis vinifera]
comp10059_c0	2	p2	(TG)9	18	195	212	--	--	--	--	DNA-directed RNA polymerase III subunit RPC4 OS=Mus musculus GN=Polr3d PE=2 SV=2	PREDICTED: uncharacterized protein LOC100256088 [Vitis vinifera]
comp10064_c0	1	p2	(AG)10	20	1433	1452	[R]	General function prediction only	Cellular Component: mitochondrion (GO:0005739);; Biological Process: copper ion homeostasis (GO:0055070);;	K07152|9e-79|vvi:100246281|hypothetical protein LOC100246281	Protein SCO1 homolog 2, mitochondrial OS=Arabidopsis thaliana GN=HCC2 PE=2 SV=1	PREDICTED: protein SCO1 homolog 2, mitochondrial-like [Vitis vinifera]
comp10077_c0	1	p2	(GA)9	18	1	18	--	--	Molecular Function: peptidase activity (GO:0008233);;	--	Ubiquitin carboxyl-terminal hydrolase 25 OS=Arabidopsis thaliana GN=UBP25 PE=2 SV=1	predicted protein [Populus trichocarpa]
comp10078_c0	1	p1	(A)17	17	1	17	[Q]	Secondary metabolites biosynthesis, transport and catabolism	Molecular Function: binding (GO:0005488);; Cellular Component: membrane (GO:0016020);; Molecular Function: oxidoreductase activity (GO:0016491);; Cellular Component: intracellular membrane-bounded organelle (GO:0043231);;	--	Cytochrome P450 71A1 OS=Persea americana GN=CYP71A1 PE=1 SV=2	P450 [Elaeis guineensis]
comp10079_c0	1	p1	(A)16	16	876	891	#N/A	#N/A	#N/A	#N/A	#N/A	#N/A
comp10081_c0	1	p2	(GA)7	14	1745	1758	--	--	Biological Process: immune effector process (GO:0002252);; Biological Process: regulation of immune system process (GO:0002682);; Biological Process: immune response (GO:0006955);; Biological Process: response to bacterium (GO:0009617);; Biological Process: response to fungus (GO:0009620);; Biological Process: response to salicylic acid (GO:0009751);; Biological Process: hormone-mediated signalin…	--	Probable WRKY transcription factor 40 OS=Arabidopsis thaliana GN=WRKY40 PE=1 SV=1	hypothetical protein RCOM_1441350 [Ricinus communis]
comp10083_c0	1	p3	(TCC)5	15	1055	1069	--	--	Molecular Function: RNA binding (GO:0003723);; Biological Process: rRNA processing (GO:0006364);; Biological Process: translation (GO:0006412);; Biological Process: signal transduction (GO:0007165);; Biological Process: aromatic amino acid family biosynthetic process (GO:0009073);; Cellular Component: chloroplast (GO:0009507);; Biological Process: de-etiolation (GO:0009704);; Biological Process: …	--	Proline-rich receptor-like protein kinase PERK9 OS=Arabidopsis thaliana GN=PERK9 PE=2 SV=1	hypothetical protein PRUPE_ppa007132mg [Prunus persica]
comp10084_c0	1	p2	(AT)6	12	4847	4858	[M]	Cell wall/membrane/envelope biogenesis	Biological Process: GPI anchor biosynthetic process (GO:0006506);; Molecular Function: phosphatidylinositol N-acetylglucosaminyltransferase activity (GO:0017176);;	K03857|0.0|vvi:100256927|hypothetical protein LOC100256927	Phosphatidylinositol N-acetylglucosaminyltransferase subunit A OS=Homo sapiens GN=PIGA PE=1 SV=1	PREDICTED: phosphatidylinositol N-acetylglucosaminyltransferase subunit A [Vitis vinifera]
comp1009_c0	1	p3	(TCT)5	15	19	33	--	--	Cellular Component: plasma membrane (GO:0005886);;	--	F-box/LRR-repeat protein 14 OS=Mus musculus GN=Fbxl14 PE=2 SV=1	Leucine-rich repeat family protein isoform 1 [Theobroma cacao]
comp10097_c0	1	p2	(AG)6	12	104	115	--	--	Biological Process: response to light intensity (GO:0009642);; Biological Process: regulation of gene expression (GO:0010468);; Cellular Component: plastid nucleoid (GO:0042646);;	--	--	PREDICTED: uncharacterized protein LOC101293582 [Fragaria vesca subsp. vesca]
comp10098_c0	1	p3	(CGT)5	15	1063	1077	--	--	Cellular Component: cytoplasm (GO:0005737);;	--	Protein-lysine methyltransferase METTL21C OS=Bos taurus GN=METTL21C PE=2 SV=1	S-adenosyl-L-methionine-dependent methyltransferases superfamily protein isoform 1 [Theobroma cacao]
comp10108_c0	1	c	(CT)6---(TCC)5	95	33	127	--	--	--	--	--	tho complex component [Ophiostoma piceae UAMH 11346]
comp10109_c0	1	c	(T)15---(A)11	69	51	119	--	--	Cellular Component: cytoplasm (GO:0005737);; Biological Process: protein glycosylation (GO:0006486);; Biological Process: calcium ion transport (GO:0006816);; Biological Process: gravitropism (GO:0009630);;	--	Uncharacterized protein At3g49055 OS=Arabidopsis thaliana GN=At3g49055 PE=2 SV=1	Uncharacterized protein isoform 1 [Theobroma cacao]
comp10109_c0	2	p2	(AG)6	12	2082	2093	--	--	Cellular Component: cytoplasm (GO:0005737);; Biological Process: protein glycosylation (GO:0006486);; Biological Process: calcium ion transport (GO:0006816);; Biological Process: gravitropism (GO:0009630);;	--	Uncharacterized protein At3g49055 OS=Arabidopsis thaliana GN=At3g49055 PE=2 SV=1	Uncharacterized protein isoform 1 [Theobroma cacao]
comp1011_c0	1	c	(A)10---(A)14	32	928	959	--	--	--	--	Probable nuclear antigen OS=Suid herpesvirus 1 (strain Kaplan) PE=4 SV=1	PREDICTED: uncharacterized protein LOC101212292 [Cucumis sativus]
comp10111_c0	1	p2	(AG)10	20	1791	1810	--	--	Cellular Component: mitochondrion (GO:0005739);; Cellular Component: endoplasmic reticulum (GO:0005783);; Biological Process: fatty acid biosynthetic process (GO:0006633);; Biological Process: response to cold (GO:0009409);; Biological Process: response to light stimulus (GO:0009416);; Cellular Component: membrane (GO:0016020);; Molecular Function: transferase activity, transferring acyl groups o…	--	3-ketoacyl-CoA synthase 12 OS=Arabidopsis thaliana GN=KCS12 PE=2 SV=1	PREDICTED: 3-ketoacyl-CoA synthase 12, partial [Vitis vinifera]
comp10114_c0	1	p3	(TAA)5	15	217	231	--	--	--	--	Serine/arginine repetitive matrix protein 2 OS=Homo sapiens GN=SRRM2 PE=1 SV=2	uncharacterized protein LOC100275407 [Zea mays]
comp10114_c0	2	p3	(GGC)5	15	344	358	--	--	--	--	Serine/arginine repetitive matrix protein 2 OS=Homo sapiens GN=SRRM2 PE=1 SV=2	uncharacterized protein LOC100275407 [Zea mays]
comp10114_c0	3	p3	(CCG)5	15	964	978	--	--	--	--	Serine/arginine repetitive matrix protein 2 OS=Homo sapiens GN=SRRM2 PE=1 SV=2	uncharacterized protein LOC100275407 [Zea mays]
comp10119_c0	1	p2	(AG)6	12	3770	3781	--	--	Cellular Component: nucleus (GO:0005634);; Biological Process: transport (GO:0006810);;	--	Transportin-3 OS=Mus musculus GN=Tnpo3 PE=1 SV=1	PREDICTED: transportin-3-like [Vitis vinifera]
comp1012_c0	1	p2	(TA)11	22	2	23	--	--	--	--	Uncharacterized protein At3g61260 OS=Arabidopsis thaliana GN=At3g61260 PE=1 SV=1	PREDICTED: uncharacterized protein LOC101257912 [Solanum lycopersicum]
comp10120_c0	1	p2	(TA)7	14	1552	1565	--	--	--	--	--	PREDICTED: uncharacterized protein LOC100262782 [Vitis vinifera]
comp10121_c0	1	p1	(C)10	10	669	678	[N]	Cell motility	Biological Process: microtubule cytoskeleton organization (GO:0000226);; Cellular Component: ESCRT III complex (GO:0000815);; Biological Process: cytokinesis by cell plate formation (GO:0000911);; Molecular Function: protein binding (GO:0005515);; Cellular Component: nucleus (GO:0005634);; Biological Process: DNA replication (GO:0006260);; Biological Process: DNA methylation (GO:0006306);; Biolog…	--	Vacuolar protein sorting-associated protein 2 homolog 2 OS=Arabidopsis thaliana GN=VPS2.2 PE=1 SV=2	hypothetical protein ZEAMMB73_680470 [Zea mays]
comp10127_c0	1	c	(TA)6(TG)6	24	11	34	#N/A	#N/A	#N/A	#N/A	#N/A	#N/A
comp1013_c0	1	p2	(CT)6	12	2478	2489	[T]	Signal transduction mechanisms	Molecular Function: phosphoprotein phosphatase activity (GO:0004721);;	--	Probable protein phosphatase 2C 39 OS=Oryza sativa subsp. japonica GN=Os04g0403701 PE=2 SV=2	hypothetical protein VITISV_031342 [Vitis vinifera]
comp10132_c0	1	p2	(TC)9	18	1	18	--	--	Cellular Component: extracellular region (GO:0005576);; Cellular Component: plasma membrane (GO:0005886);;	--	MACPF domain-containing protein At4g24290 OS=Arabidopsis thaliana GN=At4g24290 PE=2 SV=1	predicted protein [Populus trichocarpa]
comp10133_c0	1	p2	(GA)7	14	57	70	--	--	Biological Process: regulation of transcription, DNA-templated (GO:0006355);;	--	Formin-like protein 6 OS=Oryza sativa subsp. japonica GN=FH6 PE=2 SV=2	hypothetical protein OsI_16930 [Oryza sativa Indica Group]
comp10133_c0	2	p3	(GGC)5	15	621	635	--	--	Biological Process: regulation of transcription, DNA-templated (GO:0006355);;	--	Formin-like protein 6 OS=Oryza sativa subsp. japonica GN=FH6 PE=2 SV=2	hypothetical protein OsI_16930 [Oryza sativa Indica Group]
comp10133_c1	2	c	(AG)7---(T)11	74	863	936	[K]	Transcription	Molecular Function: sequence-specific DNA binding transcription factor activity (GO:0003700);; Molecular Function: transcription coactivator activity (GO:0003713);; Cellular Component: nucleolus (GO:0005730);; Biological Process: protein folding (GO:0006457);; Biological Process: response to heat (GO:0009408);; Biological Process: response to water deprivation (GO:0009414);; Biological Process: r…	K03627|5e-66|rcu:RCOM_1053340|Multiprotein-bridging factor, putative	Multiprotein-bridging factor 1c OS=Arabidopsis thaliana GN=MBF1C PE=1 SV=1	Multiprotein-bridging factor, putative [Ricinus communis]
comp10133_c1	1	p1	(T)13	13	75	87	[K]	Transcription	Molecular Function: sequence-specific DNA binding transcription factor activity (GO:0003700);; Molecular Function: transcription coactivator activity (GO:0003713);; Cellular Component: nucleolus (GO:0005730);; Biological Process: protein folding (GO:0006457);; Biological Process: response to heat (GO:0009408);; Biological Process: response to water deprivation (GO:0009414);; Biological Process: r…	K03627|5e-66|rcu:RCOM_1053340|Multiprotein-bridging factor, putative	Multiprotein-bridging factor 1c OS=Arabidopsis thaliana GN=MBF1C PE=1 SV=1	Multiprotein-bridging factor, putative [Ricinus communis]
comp10134_c0	1	p1	(A)21	21	1	21	--	--	--	--	Early nodulin-like protein 1 OS=Oryza sativa subsp. japonica GN=ENODL1 PE=1 SV=1	hypothetical protein OsI_00795 [Oryza sativa Indica Group]
comp10135_c0	1	p2	(TA)6	12	1368	1379	[V]	Defense mechanisms	Molecular Function: ATP binding (GO:0005524);; Biological Process: ATP catabolic process (GO:0006200);; Molecular Function: organic phosphonate transmembrane-transporting ATPase activity (GO:0015416);; Cellular Component: membrane (GO:0016020);;	--	ABC transporter G family member 14 OS=Arabidopsis thaliana GN=ABCG14 PE=2 SV=1	PREDICTED: ABC transporter G family member 14-like [Glycine max]
comp1014_c0	1	p1	(T)12	12	2145	2156	[S]	Function unknown	Cellular Component: plasma membrane (GO:0005886);; Cellular Component: integral component of membrane (GO:0016021);; Biological Process: transmembrane transport (GO:0055085);;	--	Probable metal-nicotianamine transporter YSL12 OS=Oryza sativa subsp. japonica GN=YSL12 PE=2 SV=2	PREDICTED: probable metal-nicotianamine transporter YSL12-like [Setaria italica]
comp10142_c0	1	p1	(T)14	14	60	73	--	--	Biological Process: maltose metabolic process (GO:0000023);; Cellular Component: chloroplast (GO:0009507);; Biological Process: thylakoid membrane organization (GO:0010027);; Biological Process: starch biosynthetic process (GO:0019252);;	--	--	PREDICTED: uncharacterized protein LOC100258439 [Vitis vinifera]
comp10148_c0	1	p2	(TA)8	16	1823	1838	[G]	Carbohydrate transport and metabolism	Biological Process: carbohydrate metabolic process (GO:0005975);; Molecular Function: beta-glucosidase activity (GO:0008422);; Biological Process: lignin biosynthetic process (GO:0009809);; Cellular Component: cytoplasmic membrane-bounded vesicle (GO:0016023);;	--	Beta-glucosidase 18 OS=Oryza sativa subsp. japonica GN=BGLU18 PE=2 SV=2	RecName: Full=Beta-glucosidase 18; Short=Os4bglu18; Flags: Precursor
comp10151_c0	1	c	(AG)7---(AGA)5	59	3315	3373	--	--	--	--	E3 ubiquitin-protein ligase BRE1A OS=Homo sapiens GN=RNF20 PE=1 SV=2	Os03g0127600 [Oryza sativa Japonica Group]
comp10152_c0	1	p2	(AT)7	14	3229	3242	[P]	Inorganic ion transport and metabolism	Molecular Function: nucleotide binding (GO:0000166);; Molecular Function: monooxygenase activity (GO:0004497);; Molecular Function: oxidoreductase activity, acting on paired donors, with incorporation or reduction of molecular oxygen (GO:0016705);; Biological Process: glucosinolate biosynthetic process (GO:0019761);; Molecular Function: coenzyme binding (GO:0050662);;	--	Flavin-containing monooxygenase FMO GS-OX-like 3 OS=Arabidopsis thaliana GN=At1g62620 PE=2 SV=2	PREDICTED: flavin-containing monooxygenase FMO GS-OX-like 3-like [Vitis vinifera]
comp1016_c0	1	p1	(A)11	11	3289	3299	--	--	Molecular Function: nucleic acid binding (GO:0003676);; Cellular Component: cytosol (GO:0005829);; Biological Process: protein import into nucleus (GO:0006606);; Molecular Function: hydrolase activity (GO:0016787);;	K13210|1e-120|vvi:100259454|hypothetical protein LOC100259454	Glutenin, high molecular weight subunit PW212 OS=Triticum aestivum PE=3 SV=1	PREDICTED: uncharacterized protein LOC100259454 [Vitis vinifera]
comp10165_c0	1	p1	(T)21	21	1642	1662	#N/A	#N/A	#N/A	#N/A	#N/A	#N/A
comp10168_c0	1	p2	(TC)9	18	1435	1452	#N/A	#N/A	#N/A	#N/A	#N/A	#N/A
comp10170_c0	1	p1	(A)19	19	1	19	#N/A	#N/A	#N/A	#N/A	#N/A	#N/A
comp10174_c0	1	c	(CT)9(GC)7	32	1	32	[D]	Cell cycle control, cell division, chromosome partitioning	Biological Process: maltose metabolic process (GO:0000023);; Molecular Function: ATP binding (GO:0005524);; Biological Process: pentose-phosphate shunt (GO:0006098);; Biological Process: rRNA processing (GO:0006364);; Cellular Component: chloroplast stroma (GO:0009570);; Biological Process: chloroplast relocation (GO:0009902);; Biological Process: thylakoid membrane organization (GO:0010027);; Bi…	--	Protein mrp homolog OS=Synechocystis sp. (strain PCC 6803 / Kazusa) GN=mrp PE=3 SV=1	unnamed protein product [Vitis vinifera]
comp1018_c0	1	p1	(T)10	10	608	617	--	--	--	--	--	hypothetical protein VITISV_023939 [Vitis vinifera]
comp10181_c0	1	p2	(TC)6	12	3158	3169	[S]	Function unknown	Biological Process: metabolic process (GO:0008152);; Biological Process: cellular process (GO:0009987);; Cellular Component: membrane (GO:0016020);; Molecular Function: kinase activity (GO:0016301);; Biological Process: single-organism process (GO:0044699);; Biological Process: response to stimulus (GO:0050896);;	--	Probable LRR receptor-like serine/threonine-protein kinase At2g16250 OS=Arabidopsis thaliana GN=At2g16250 PE=1 SV=1	Leucine-rich repeat protein kinase family protein [Theobroma cacao]
comp10184_c0	2	p2	(CT)6	12	1089	1100	--	--	Cellular Component: cytoplasm (GO:0005737);; Molecular Function: methyltransferase activity (GO:0008168);; Biological Process: methylation (GO:0032259);;	--	Methyltransferase-like protein 13 OS=Bos taurus GN=METTL13 PE=2 SV=1	PREDICTED: methyltransferase-like protein 13 [Vitis vinifera]
comp10184_c0	1	p3	(ATG)5	15	254	268	--	--	Cellular Component: cytoplasm (GO:0005737);; Molecular Function: methyltransferase activity (GO:0008168);; Biological Process: methylation (GO:0032259);;	--	Methyltransferase-like protein 13 OS=Bos taurus GN=METTL13 PE=2 SV=1	PREDICTED: methyltransferase-like protein 13 [Vitis vinifera]
comp10190_c0	1	p6	(CGTCGC)5	30	817	846	[M]	Cell wall/membrane/envelope biogenesis	--	--	UPF0468 protein CG5343 OS=Drosophila melanogaster GN=CG5343 PE=1 SV=1	Pectin lyase-like superfamily protein [Theobroma cacao]
comp10193_c0	1	p1	(A)10	10	2049	2058	[K]	Transcription	--	--	Double-stranded RNA-binding protein 2 OS=Oryza sativa subsp. japonica GN=DRB2 PE=2 SV=1	double-stranded RNA-binding (DsRBD) domain-containing protein [Musa acuminata]
comp102_c0	1	p3	(AGC)5	15	367	381	[P]	Inorganic ion transport and metabolism	Biological Process: response to stress (GO:0006950);; Biological Process: metal ion transport (GO:0030001);; Biological Process: response to chemical (GO:0042221);; Cellular Component: intracellular organelle (GO:0043229);; Biological Process: single-organism cellular process (GO:0044763);; Molecular Function: metal ion binding (GO:0046872);;	K07213|8e-34|rcu:RCOM_0148180|copper transport protein atox1, putative	Copper transport protein ATX1 OS=Arabidopsis thaliana GN=ATX1 PE=1 SV=1	copper chaperone [Jatropha curcas]
comp1020_c0	1	p1	(A)10	10	2	11	--	--	Molecular Function: nucleic acid binding (GO:0003676);; Molecular Function: hydrolase activity (GO:0016787);; Biological Process: shoot system development (GO:0048367);;	--	Poly(rC)-binding protein 3 OS=Homo sapiens GN=PCBP3 PE=2 SV=2	PREDICTED: KH domain-containing protein At4g18375 isoform 1 [Vitis vinifera]
comp1020_c0	3	p1	(T)10	10	1728	1737	--	--	Molecular Function: nucleic acid binding (GO:0003676);; Molecular Function: hydrolase activity (GO:0016787);; Biological Process: shoot system development (GO:0048367);;	--	Poly(rC)-binding protein 3 OS=Homo sapiens GN=PCBP3 PE=2 SV=2	PREDICTED: KH domain-containing protein At4g18375 isoform 1 [Vitis vinifera]
comp1020_c0	2	p3	(GGA)6	18	163	180	--	--	Molecular Function: nucleic acid binding (GO:0003676);; Molecular Function: hydrolase activity (GO:0016787);; Biological Process: shoot system development (GO:0048367);;	--	Poly(rC)-binding protein 3 OS=Homo sapiens GN=PCBP3 PE=2 SV=2	PREDICTED: KH domain-containing protein At4g18375 isoform 1 [Vitis vinifera]
comp10201_c0	1	p2	(TC)6	12	54	65	--	--	Cellular Component: extracellular region (GO:0005576);; Cellular Component: integral component of membrane (GO:0016021);;	--	Transmembrane protein 184A OS=Homo sapiens GN=TMEM184A PE=2 SV=1	hypothetical protein M569_00787, partial [Genlisea aurea]
comp10214_c0	1	p3	(GGA)6	18	129	146	[T]	Signal transduction mechanisms	Molecular Function: protein serine/threonine phosphatase activity (GO:0004722);; Biological Process: protein dephosphorylation (GO:0006470);; Cellular Component: protein serine/threonine phosphatase complex (GO:0008287);; Molecular Function: metal ion binding (GO:0046872);;	--	Probable protein phosphatase 2C 42 OS=Arabidopsis thaliana GN=At3g17090 PE=2 SV=1	PREDICTED: probable protein phosphatase 2C 42 [Vitis vinifera]
comp10215_c0	1	p2	(GA)10	20	1	20	[KL]	--	Molecular Function: binding (GO:0005488);; Cellular Component: intracellular membrane-bounded organelle (GO:0043231);;	--	Helicase protein MOM1 OS=Arabidopsis thaliana GN=MOM1 PE=1 SV=1	unnamed protein product [Vitis vinifera]
comp10218_c0	1	p3	(CCA)5	15	235	249	[F]	Nucleotide transport and metabolism	Molecular Function: thymidine kinase activity (GO:0004797);; Molecular Function: ATP binding (GO:0005524);; Cellular Component: mitochondrion (GO:0005739);; Biological Process: DNA replication (GO:0006260);; Biological Process: nucleotide biosynthetic process (GO:0009165);; Cellular Component: chloroplast (GO:0009507);; Biological Process: phosphorylation (GO:0016310);; Molecular Function: metal …	K00857|1e-120|osa:4331376|Os03g0113100	Thymidine kinase OS=Oryza sativa subsp. japonica GN=TK PE=2 SV=2	Putative thymidine kinase [Oryza sativa Japonica Group]
comp10222_c0	1	p1	(T)19	19	940	958	#N/A	#N/A	#N/A	#N/A	#N/A	#N/A
comp10223_c0	1	p3	(AGA)6	18	2348	2365	[E]	Amino acid transport and metabolism	Molecular Function: prephenate dehydratase activity (GO:0004664);; Cellular Component: cytosol (GO:0005829);; Biological Process: tyrosine biosynthetic process (GO:0006571);; Biological Process: L-phenylalanine biosynthetic process (GO:0009094);; Cellular Component: chloroplast (GO:0009507);; Biological Process: response to low fluence blue light stimulus by blue low-fluence system (GO:0010244);;…	--	Arogenate dehydratase 3, chloroplastic OS=Arabidopsis thaliana GN=ADT3 PE=1 SV=1	prephenate dehydratase [Ipomoea trifida]
comp10227_c0	1	p2	(AG)10	20	1	20	--	--	Molecular Function: nucleotide binding (GO:0000166);; Molecular Function: protein serine/threonine kinase activity (GO:0004674);; Biological Process: phosphorylation (GO:0016310);;	--	Receptor like protein kinase S.3 OS=Arabidopsis thaliana GN=LECRKS3 PE=3 SV=1	kinase, putative [Ricinus communis]
comp1023_c0	1	p2	(AG)7	14	581	594	[U]	Intracellular trafficking, secretion, and vesicular transport	Cellular Component: endoplasmic reticulum (GO:0005783);; Cellular Component: plasma membrane (GO:0005886);; Biological Process: signal peptide processing (GO:0006465);; Biological Process: proteolysis (GO:0006508);; Molecular Function: peptidase activity (GO:0008233);; Cellular Component: chloroplast (GO:0009507);; Biological Process: systemic acquired resistance (GO:0009627);; Cellular Component…	K13280|1e-116|vvi:100257730|hypothetical protein LOC100257730	Signal peptidase complex catalytic subunit SEC11A OS=Mus musculus GN=Sec11a PE=2 SV=1	PREDICTED: signal peptidase complex catalytic subunit SEC11C-like [Glycine max]
comp1023_c0	2	p2	(CT)10	20	1470	1489	[U]	Intracellular trafficking, secretion, and vesicular transport	Cellular Component: endoplasmic reticulum (GO:0005783);; Cellular Component: plasma membrane (GO:0005886);; Biological Process: signal peptide processing (GO:0006465);; Biological Process: proteolysis (GO:0006508);; Molecular Function: peptidase activity (GO:0008233);; Cellular Component: chloroplast (GO:0009507);; Biological Process: systemic acquired resistance (GO:0009627);; Cellular Component…	K13280|1e-116|vvi:100257730|hypothetical protein LOC100257730	Signal peptidase complex catalytic subunit SEC11A OS=Mus musculus GN=Sec11a PE=2 SV=1	PREDICTED: signal peptidase complex catalytic subunit SEC11C-like [Glycine max]
comp10233_c0	1	p2	(TC)6	12	2251	2262	--	--	Cellular Component: nucleus (GO:0005634);; Cellular Component: plasmodesma (GO:0009506);; Molecular Function: oxidoreductase activity, acting on paired donors, with incorporation or reduction of molecular oxygen, 2-oxoglutarate as one donor, and incorporation of one atom each of oxygen into both donors (GO:0016706);; Biological Process: oxidation-reduction process (GO:0055114);;	--	RNA demethylase ALKBH5 OS=Xenopus tropicalis GN=alkbh5 PE=2 SV=1	PREDICTED: uncharacterized protein LOC100250563 [Vitis vinifera]
comp10240_c0	1	p2	(TA)6	12	9	20	--	--	--	--	--	hypothetical protein SORBIDRAFT_03g037210 [Sorghum bicolor]
comp10241_c0	1	p2	(GA)6	12	1100	1111	--	--	--	--	Transcription factor bHLH149 OS=Arabidopsis thaliana GN=BHLH149 PE=1 SV=1	PREDICTED: transcription factor SOX-30-like [Setaria italica]
comp10246_c0	2	p1	(A)10	10	2009	2018	--	--	Molecular Function: sequence-specific DNA binding transcription factor activity (GO:0003700);; Cellular Component: nucleus (GO:0005634);; Biological Process: regulation of transcription, DNA-templated (GO:0006355);; Biological Process: response to heat (GO:0009408);; Cellular Component: cytoplasmic membrane-bounded vesicle (GO:0016023);; Molecular Function: sequence-specific DNA binding (GO:00435…	--	Heat stress transcription factor A-1 OS=Oryza sativa subsp. japonica GN=HSFA1 PE=2 SV=1	hypothetical protein VITISV_017888 [Vitis vinifera]
comp10246_c0	1	p3	(TTG)5	15	1104	1118	--	--	Molecular Function: sequence-specific DNA binding transcription factor activity (GO:0003700);; Cellular Component: nucleus (GO:0005634);; Biological Process: regulation of transcription, DNA-templated (GO:0006355);; Biological Process: response to heat (GO:0009408);; Cellular Component: cytoplasmic membrane-bounded vesicle (GO:0016023);; Molecular Function: sequence-specific DNA binding (GO:00435…	--	Heat stress transcription factor A-1 OS=Oryza sativa subsp. japonica GN=HSFA1 PE=2 SV=1	hypothetical protein VITISV_017888 [Vitis vinifera]
comp10248_c0	1	p1	(T)13	13	1831	1843	--	--	--	K13153|5e-43|rcu:RCOM_0900820|hypothetical protein	U11/U12 small nuclear ribonucleoprotein 25 kDa protein OS=Homo sapiens GN=SNRNP25 PE=1 SV=1	conserved hypothetical protein [Ricinus communis]
comp10249_c0	1	p1	(A)12	12	371	382	--	--	Biological Process: pentose-phosphate shunt (GO:0006098);; Cellular Component: chloroplast thylakoid lumen (GO:0009543);; Biological Process: photosystem II assembly (GO:0010207);;	--	Photosystem II D1 precursor processing protein PSB27-H2, chloroplastic OS=Arabidopsis thaliana GN=PSB27-2 PE=1 SV=1	hypothetical protein VITISV_022066 [Vitis vinifera]
comp1025_c0	1	p2	(TC)8	16	1284	1299	--	--	Cellular Component: vacuole (GO:0005773);; Cellular Component: plasma membrane (GO:0005886);; Biological Process: intracellular protein transport (GO:0006886);;	--	Alpha-soluble NSF attachment protein OS=Vitis vinifera PE=2 SV=1	hypothetical protein PRUPE_ppa009507mg [Prunus persica]
comp10250_c0	1	c	(CT)7ttctttcc(CT)7	36	1480	1515	[RTKL]	--	Molecular Function: protein serine/threonine kinase activity (GO:0004674);; Molecular Function: ATP binding (GO:0005524);; Biological Process: protein phosphorylation (GO:0006468);;	K14498|0.0|vvi:100243594|hypothetical protein LOC100243594	Serine/threonine-protein kinase SAPK1 OS=Oryza sativa subsp. japonica GN=SAPK1 PE=1 SV=1	PREDICTED: serine/threonine-protein kinase SAPK3 [Vitis vinifera]
comp10251_c0	1	p1	(T)10	10	696	705	--	--	Molecular Function: DNA binding (GO:0003677);; Cellular Component: nucleus (GO:0005634);; Biological Process: regulation of transcription, DNA-templated (GO:0006355);;	K09060|2e-09|vvi:100243644|hypothetical protein LOC100243644	G-box-binding factor 1 OS=Arabidopsis thaliana GN=GBF1 PE=2 SV=2	unknown [Picea sitchensis]
comp10253_c0	1	p1	(T)10	10	136	145	[RTKL]	--	Molecular Function: protein serine/threonine kinase activity (GO:0004674);; Molecular Function: ATP binding (GO:0005524);; Cellular Component: nucleus (GO:0005634);; Biological Process: protein phosphorylation (GO:0006468);; Cellular Component: chloroplast (GO:0009507);; Molecular Function: identical protein binding (GO:0042802);;	K08864|0.0|vvi:100265049|hypothetical protein LOC100265049	Serine/threonine-protein kinase TOUSLED OS=Arabidopsis thaliana GN=TOUSLED PE=1 SV=1	PREDICTED: serine/threonine-protein kinase TOUSLED [Vitis vinifera]
comp10257_c0	1	p2	(TC)6	12	1553	1564	--	--	Cellular Component: nucleus (GO:0005634);; Biological Process: regulation of transcription, DNA-templated (GO:0006355);; Molecular Function: zinc ion binding (GO:0008270);; Biological Process: positive regulation of cell proliferation (GO:0008284);; Biological Process: photoperiodism, flowering (GO:0048573);;	--	Activating signal cointegrator 1 OS=Mus musculus GN=Trip4 PE=1 SV=2	PREDICTED: activating signal cointegrator 1 [Vitis vinifera]
comp10266_c0	1	p1	(T)19	19	1	19	--	--	Cellular Component: cell wall (GO:0005618);; Cellular Component: mitochondrion (GO:0005739);;	K11982|1e-105|vvi:100265395|similar to thioredoxin-related protein	E3 ubiquitin-protein ligase RING1 OS=Gossypium hirsutum GN=RING1 PE=2 SV=1	RING-H2 finger C1A, putative [Theobroma cacao]
comp10267_c0	1	p3	(CCG)5	15	2980	2994	[L]	Replication, recombination and repair	Biological Process: resolution of meiotic recombination intermediates (GO:0000712);; Molecular Function: DNA binding (GO:0003677);; Molecular Function: DNA topoisomerase type I activity (GO:0003917);; Cellular Component: nucleus (GO:0005634);; Cellular Component: chromosome (GO:0005694);; Biological Process: DNA topological change (GO:0006265);; Biological Process: DNA unwinding involved in DNA r…	K03165|0.0|vvi:100248256|hypothetical protein LOC100248256	DNA topoisomerase 3-alpha OS=Homo sapiens GN=TOP3A PE=1 SV=1	PREDICTED: DNA topoisomerase 3-alpha-like [Cicer arietinum]
comp10269_c0	1	p2	(GA)11	22	1725	1746	--	--	Biological Process: protein sumoylation (GO:0016925);;	--	Probable sensor histidine kinase HK OS=Mycobacterium tuberculosis GN=MT0630 PE=3 SV=1	PREDICTED: uncharacterized protein LOC101222359 [Cucumis sativus]
comp10278_c0	2	p2	(AG)9	18	678	695	--	--	--	--	Homeobox protein knotted-1-like 3 OS=Malus domestica PE=2 SV=1	PREDICTED: homeobox protein knotted-1-like 3 [Vitis vinifera]
comp10278_c0	1	p3	(TGG)5	15	109	123	--	--	--	--	Homeobox protein knotted-1-like 3 OS=Malus domestica PE=2 SV=1	PREDICTED: homeobox protein knotted-1-like 3 [Vitis vinifera]
comp1028_c0	1	p2	(GA)6	12	108	119	[I]	Lipid transport and metabolism	Biological Process: lipid metabolic process (GO:0006629);; Molecular Function: oxidoreductase activity, acting on paired donors, with oxidation of a pair of donors resulting in the reduction of molecular oxygen to two molecules of water (GO:0016717);; Molecular Function: delta12-fatty acid dehydrogenase activity (GO:0016720);; Biological Process: oxidation-reduction process (GO:0055114);;	K10256|0.0|rcu:RCOM_0503360|omega-6 desaturase, endoplasmic reticulum (EC:1.14.99.33)	Omega-6 fatty acid desaturase, endoplasmic reticulum isozyme 2 OS=Glycine max GN=FAD2-2 PE=2 SV=1	omega-6 fatty acid desaturase 2 endoplasmic reticulum isozyme 2c [Musa AB Group]
comp1028_c0	2	p2	(TC)7	14	268	281	[I]	Lipid transport and metabolism	Biological Process: lipid metabolic process (GO:0006629);; Molecular Function: oxidoreductase activity, acting on paired donors, with oxidation of a pair of donors resulting in the reduction of molecular oxygen to two molecules of water (GO:0016717);; Molecular Function: delta12-fatty acid dehydrogenase activity (GO:0016720);; Biological Process: oxidation-reduction process (GO:0055114);;	K10256|0.0|rcu:RCOM_0503360|omega-6 desaturase, endoplasmic reticulum (EC:1.14.99.33)	Omega-6 fatty acid desaturase, endoplasmic reticulum isozyme 2 OS=Glycine max GN=FAD2-2 PE=2 SV=1	omega-6 fatty acid desaturase 2 endoplasmic reticulum isozyme 2c [Musa AB Group]
comp10280_c0	1	p3	(GCG)5	15	172	186	[M]	Cell wall/membrane/envelope biogenesis	Cellular Component: mitochondrion (GO:0005739);; Cellular Component: plastid outer membrane (GO:0009527);; Biological Process: chloroplast organization (GO:0009658);; Biological Process: embryo development ending in seed dormancy (GO:0009793);; Cellular Component: chloroplast envelope (GO:0009941);; Biological Process: photosystem II assembly (GO:0010207);;	K07277|0.0|rcu:RCOM_1577380|sorting and assembly machinery (sam50) protein, putative	Outer envelope protein 80, chloroplastic OS=Arabidopsis thaliana GN=OEP80 PE=1 SV=1	sorting and assembly machinery (sam50) protein, putative [Ricinus communis]
comp10283_c0	1	p3	(GAG)5	15	436	450	[S]	Function unknown	Molecular Function: aminoacyl-tRNA hydrolase activity (GO:0004045);; Cellular Component: plastid (GO:0009536);; Cellular Component: cytoplasmic membrane-bounded vesicle (GO:0016023);;	K04794|4e-67|osa:4337239|Os04g0652900	Peptidyl-tRNA hydrolase 2, mitochondrial OS=Homo sapiens GN=PTRH2 PE=1 SV=1	predicted protein [Hordeum vulgare subsp. vulgare]
comp10287_c0	1	p1	(A)10	10	3951	3960	--	--	Molecular Function: ubiquitin-protein ligase activity (GO:0004842);; Cellular Component: nucleus (GO:0005634);; Cellular Component: mitochondrion (GO:0005739);; Biological Process: pollen maturation (GO:0010152);; Biological Process: calcium-mediated signaling (GO:0019722);; Biological Process: protein ubiquitination involved in ubiquitin-dependent protein catabolic process (GO:0042787);; Biologi…	--	C2 and GRAM domain-containing protein At1g03370 OS=Arabidopsis thaliana GN=At1g03370 PE=2 SV=4	C2 calcium/lipid-binding and GRAM domain containing protein [Theobroma cacao]
comp10287_c0	2	p1	(A)11	11	4064	4074	--	--	Molecular Function: ubiquitin-protein ligase activity (GO:0004842);; Cellular Component: nucleus (GO:0005634);; Cellular Component: mitochondrion (GO:0005739);; Biological Process: pollen maturation (GO:0010152);; Biological Process: calcium-mediated signaling (GO:0019722);; Biological Process: protein ubiquitination involved in ubiquitin-dependent protein catabolic process (GO:0042787);; Biologi…	--	C2 and GRAM domain-containing protein At1g03370 OS=Arabidopsis thaliana GN=At1g03370 PE=2 SV=4	C2 calcium/lipid-binding and GRAM domain containing protein [Theobroma cacao]
comp10288_c0	1	c	(AG)9---(AG)6	44	1	44	--	--	Molecular Function: binding (GO:0005488);; Cellular Component: nucleus (GO:0005634);; Biological Process: transcription, DNA-templated (GO:0006351);;	--	Barley B recombinant-like protein D OS=Oryza sativa subsp. japonica GN=Os06g0130600 PE=2 SV=1	GAGA-binding transcriptional activator BBR/BPC6-like [Vitis vinifera]
comp10291_c0	1	p2	(CT)10	20	1806	1825	--	--	Molecular Function: hydrolase activity, hydrolyzing O-glycosyl compounds (GO:0004553);; Biological Process: carbohydrate metabolic process (GO:0005975);; Biological Process: asymmetric cell division (GO:0008356);; Biological Process: cytokinin-activated signaling pathway (GO:0009736);; Molecular Function: cation binding (GO:0043169);; Cellular Component: anchored component of plasma membrane (GO:…	--	Glucan endo-1,3-beta-glucosidase 9 OS=Arabidopsis thaliana GN=At5g58480 PE=1 SV=1	predicted protein [Populus trichocarpa]
comp10294_c0	2	p1	(T)16	16	2313	2328	[R]	General function prediction only	Biological Process: cell redox homeostasis (GO:0045454);;	--	TPR repeat-containing thioredoxin TTL1 OS=Arabidopsis thaliana GN=TTL1 PE=1 SV=1	Tetratricopetide-repeat thioredoxin-like 1 isoform 1 [Theobroma cacao]
comp10294_c0	1	p3	(GGC)5	15	4	18	[R]	General function prediction only	Biological Process: cell redox homeostasis (GO:0045454);;	--	TPR repeat-containing thioredoxin TTL1 OS=Arabidopsis thaliana GN=TTL1 PE=1 SV=1	Tetratricopetide-repeat thioredoxin-like 1 isoform 1 [Theobroma cacao]
comp10298_c0	1	c	(AC)10---(AG)8	83	1	83	--	--	Molecular Function: adenyl nucleotide binding (GO:0030554);;	--	SNF1-related protein kinase regulatory subunit gamma-like PV42a OS=Arabidopsis thaliana GN=PV42A PE=2 SV=1	Os02g0158900 [Oryza sativa Japonica Group]
comp10299_c0	1	p2	(CT)10	20	1	20	--	--	Cellular Component: cytoplasmic membrane-bounded vesicle (GO:0016023);; Cellular Component: anchored component of plasma membrane (GO:0046658);;	--	Uncharacterized GPI-anchored protein At4g28100 OS=Arabidopsis thaliana GN=At4g28100 PE=1 SV=1	PREDICTED: uncharacterized GPI-anchored protein At4g28100-like [Vitis vinifera]
comp103_c0	1	p2	(GA)12	24	1	24	--	--	--	--	Uncharacterized protein ORF3 OS=Grapevine fleck virus (isolate Italy/MT48) GN=ORF3 PE=4 SV=1	ARID/BRIGHT DNA-binding domain containing protein [Rhodosporidium toruloides NP11]
comp10302_c0	1	c	(T)10---(T)10	46	1295	1340	[RTKL]	--	Molecular Function: calmodulin-dependent protein kinase activity (GO:0004683);; Molecular Function: calcium ion binding (GO:0005509);; Molecular Function: ATP binding (GO:0005524);; Cellular Component: plasma membrane (GO:0005886);; Biological Process: protein phosphorylation (GO:0006468);;	K13412|0.0|vvi:100246691|hypothetical protein LOC100246691	Calcium-dependent protein kinase 10 OS=Arabidopsis thaliana GN=CPK10 PE=1 SV=1	unnamed protein product [Vitis vinifera]
comp10303_c0	1	p2	(CT)10	20	1908	1927	[E]	Amino acid transport and metabolism	Molecular Function: 4-hydroxy-tetrahydrodipicolinate reductase (GO:0008839);; Biological Process: lysine biosynthetic process via diaminopimelate (GO:0009089);; Cellular Component: chloroplast stroma (GO:0009570);; Biological Process: photosynthetic electron transport in photosystem I (GO:0009773);; Biological Process: leaf morphogenesis (GO:0009965);; Biological Process: stomatal complex morphog…	K00215|3e-96|osa:4331417|Os03g0118600	Putative 4-hydroxy-tetrahydrodipicolinate reductase 3, chloroplastic OS=Arabidopsis thaliana GN=DAPB3 PE=2 SV=1	hypothetical protein OsI_09752 [Oryza sativa Indica Group]
comp10304_c0	1	p3	(CTC)6	18	213	230	#N/A	#N/A	#N/A	#N/A	#N/A	#N/A
comp10308_c0	1	p1	(A)10	10	41	50	[D]	Cell cycle control, cell division, chromosome partitioning	Cellular Component: mitochondrion (GO:0005739);; Cellular Component: membrane (GO:0016020);;	--	Reticulon-like protein B21 OS=Arabidopsis thaliana GN=RTNLB21 PE=2 SV=2	hypothetical protein PRUPE_ppa002580mg [Prunus persica]
comp10308_c0	2	p3	(CCT)5	15	1606	1620	[D]	Cell cycle control, cell division, chromosome partitioning	Cellular Component: mitochondrion (GO:0005739);; Cellular Component: membrane (GO:0016020);;	--	Reticulon-like protein B21 OS=Arabidopsis thaliana GN=RTNLB21 PE=2 SV=2	hypothetical protein PRUPE_ppa002580mg [Prunus persica]
comp10308_c0	3	p3	(AGA)5	15	2397	2411	[D]	Cell cycle control, cell division, chromosome partitioning	Cellular Component: mitochondrion (GO:0005739);; Cellular Component: membrane (GO:0016020);;	--	Reticulon-like protein B21 OS=Arabidopsis thaliana GN=RTNLB21 PE=2 SV=2	hypothetical protein PRUPE_ppa002580mg [Prunus persica]
comp10316_c1	1	p1	(A)13	13	755	767	--	--	Molecular Function: binding (GO:0005488);;	--	--	hypothetical protein VITISV_022223 [Vitis vinifera]
comp10319_c0	1	p2	(CT)9	18	1899	1916	--	--	--	--	Basic proline-rich protein OS=Sus scrofa PE=1 SV=2	predicted protein [Populus trichocarpa]
comp1032_c0	1	p1	(G)11	11	146	156	[J]	Translation, ribosomal structure and biogenesis	Biological Process: mitotic G2 phase (GO:0000085);; Biological Process: RNA methylation (GO:0001510);; Molecular Function: aminopeptidase activity (GO:0004177);; Cellular Component: nucleolus (GO:0005730);; Cellular Component: plasma membrane (GO:0005886);; Biological Process: purine nucleotide biosynthetic process (GO:0006164);; Biological Process: proteolysis (GO:0006508);; Biological Process: …	--	Proliferation-associated protein 2G4 OS=Mus musculus GN=Pa2g4 PE=1 SV=3	predicted protein [Populus trichocarpa]
comp10320_c0	1	p1	(T)12	12	1	12	[I]	Lipid transport and metabolism	Molecular Function: calmodulin binding (GO:0005516);; Cellular Component: mitochondrion (GO:0005739);; Cellular Component: plasma membrane (GO:0005886);; Biological Process: ATP catabolic process (GO:0006200);; Biological Process: phosphatidylinositol biosynthetic process (GO:0006661);; Biological Process: cell adhesion (GO:0007155);; Biological Process: regulation of cell size (GO:0008361);; Mol…	K00995|1e-110|vvi:100245021|hypothetical protein LOC100245021	CDP-diacylglycerol--glycerol-3-phosphate 3-phosphatidyltransferase OS=Yersinia enterocolitica serotype O:8 / biotype 1B (strain 8081) GN=pgsA PE=3 SV=1	unnamed protein product [Vitis vinifera]
comp10322_c0	1	p3	(TCT)5	15	771	785	--	--	Cellular Component: plastid (GO:0009536);;	--	Mucin-5AC (Fragments) OS=Homo sapiens GN=MUC5AC PE=1 SV=3	glycosyltransferase [Zea mays]
comp10323_c0	1	p1	(A)12	12	1169	1180	[R]	General function prediction only	Molecular Function: GTP binding (GO:0005525);; Biological Process: small GTPase mediated signal transduction (GO:0007264);; Biological Process: protein transport (GO:0015031);;	K07890|3e-99|osa:4338469|Os05g0341600	Ras-related protein Rab-21 OS=Mus musculus GN=Rab21 PE=1 SV=4	PREDICTED: ras-related protein Rab-21-like [Setaria italica]
comp10325_c0	1	p3	(CTC)5	15	453	467	--	--	--	--	Translation initiation factor IF-2 OS=Methylobacterium populi (strain ATCC BAA-705 / NCIMB 13946 / BJ001) GN=infB PE=3 SV=1	hypothetical protein VITISV_041548 [Vitis vinifera]
comp10325_c1	1	p2	(AG)9	18	1	18	--	--	Biological Process: pentose-phosphate shunt (GO:0006098);; Cellular Component: chloroplast stroma (GO:0009570);; Biological Process: leaf morphogenesis (GO:0009965);; Biological Process: isopentenyl diphosphate biosynthetic process, methylerythritol 4-phosphate pathway (GO:0019288);; Biological Process: cell differentiation (GO:0030154);;	--	--	PREDICTED: uncharacterized protein LOC100268130 [Vitis vinifera]
comp10326_c0	1	p3	(ACA)5	15	1059	1073	--	--	--	--	NAC domain-containing protein 100 OS=Arabidopsis thaliana GN=NAC100 PE=2 SV=1	NAC domain protein, IPR003441, putative [Theobroma cacao]
comp10328_c0	1	p3	(GCC)6	18	478	495	--	--	--	--	Protein PHLOEM PROTEIN 2-LIKE A10 OS=Arabidopsis thaliana GN=PP2A10 PE=2 SV=1	hypothetical protein PRUPE_ppa006867mg [Prunus persica]
comp10331_c0	1	p2	(GA)6	12	987	998	--	--	--	K09286|1e-23|sbi:SORBI_06g030660|hypothetical protein	Ethylene-responsive transcription factor RAP2-10 OS=Arabidopsis thaliana GN=RAP2-10 PE=2 SV=1	hypothetical protein SORBIDRAFT_06g030660 [Sorghum bicolor]
comp10332_c0	1	p2	(AG)6	12	1824	1835	[G]	Carbohydrate transport and metabolism	Molecular Function: 6-phosphofructokinase activity (GO:0003872);; Molecular Function: ATP binding (GO:0005524);; Cellular Component: 6-phosphofructokinase complex (GO:0005945);; Biological Process: fructose 6-phosphate metabolic process (GO:0006002);; Biological Process: glycolysis (GO:0006096);; Biological Process: phosphorylation (GO:0016310);;	K00850|0.0|rcu:RCOM_0880730|phosphofructokinase, putative (EC:2.7.1.11)	6-phosphofructokinase 2 OS=Arabidopsis thaliana GN=PFK2 PE=1 SV=1	Phosphofructokinase 2 [Theobroma cacao]
comp10333_c0	1	p1	(T)10	10	64	73	--	--	Molecular Function: DNA binding (GO:0003677);; Molecular Function: sequence-specific DNA binding transcription factor activity (GO:0003700);; Cellular Component: nucleus (GO:0005634);; Biological Process: regulation of transcription, DNA-templated (GO:0006355);;	K09287|2e-93|osa:4339522|Os05g0549800	AP2/ERF and B3 domain-containing protein Os05g0549800 OS=Oryza sativa subsp. japonica GN=Os05g0549800 PE=2 SV=1	Os05g0549800 [Oryza sativa Japonica Group]
comp10334_c0	1	p2	(GA)7	14	478	491	--	--	Cellular Component: membrane (GO:0016020);; Cellular Component: intracellular membrane-bounded organelle (GO:0043231);; Cellular Component: cytoplasmic part (GO:0044444);;	--	Outer envelope pore protein 16-4, chloroplastic OS=Arabidopsis thaliana GN=OEP164 PE=2 SV=1	unnamed protein product [Vitis vinifera]
comp10337_c0	1	p2	(CT)10	20	375	394	--	--	--	--	--	PREDICTED: uncharacterized protein LOC100818177 [Glycine max]
comp10338_c0	1	p1	(A)10	10	102	111	--	--	Biological Process: response to chemical (GO:0042221);;	--	NAC domain-containing protein 68 OS=Oryza sativa subsp. japonica GN=NAC68 PE=2 SV=1	NAC domain protein, IPR003441 [Populus trichocarpa]
comp10339_c0	1	p3	(CCG)6	18	1	18	[P]	Inorganic ion transport and metabolism	Molecular Function: nucleotide binding (GO:0000166);; Molecular Function: RNA binding (GO:0003723);; Cellular Component: intracellular (GO:0005622);; Molecular Function: zinc ion binding (GO:0008270);;	--	Zinc finger Ran-binding domain-containing protein 2 OS=Pongo abelii GN=ZRANB2 PE=2 SV=1	PREDICTED: uncharacterized protein LOC100249627 [Vitis vinifera]
comp10340_c0	1	p1	(A)11	11	1043	1053	--	--	Molecular Function: nucleotide binding (GO:0000166);; Molecular Function: inositol 2-dehydrogenase activity (GO:0050112);; Biological Process: oxidation-reduction process (GO:0055114);;	--	--	hypothetical protein OsI_38087 [Oryza sativa Indica Group]
comp10349_c0	1	p2	(TC)10	20	5	24	--	--	--	--	--	hypothetical protein OsI_22328 [Oryza sativa Indica Group]
comp10349_c0	2	p2	(TG)7	14	164	177	--	--	--	--	--	hypothetical protein OsI_22328 [Oryza sativa Indica Group]
comp10349_c0	3	p2	(TC)7	14	317	330	--	--	--	--	--	hypothetical protein OsI_22328 [Oryza sativa Indica Group]
comp1035_c0	1	p2	(CT)8	16	119	134	[G]	Carbohydrate transport and metabolism	Cellular Component: plasma membrane (GO:0005886);; Biological Process: carbohydrate metabolic process (GO:0005975);; Cellular Component: plant-type cell wall (GO:0009505);; Biological Process: response to abscisic acid (GO:0009737);; Molecular Function: isomerase activity (GO:0016853);; Molecular Function: carbohydrate binding (GO:0030246);;	K01792|0.0|vvi:100259893|hypothetical protein LOC100259893	Putative glucose-6-phosphate 1-epimerase OS=Cenchrus ciliaris PE=2 SV=1	PREDICTED: putative glucose-6-phosphate 1-epimerase [Vitis vinifera]
comp10351_c0	1	p1	(A)20	20	1	20	#N/A	#N/A	#N/A	#N/A	#N/A	#N/A
comp1036_c0	1	p2	(TC)10	20	1887	1906	[V]	Defense mechanisms	Cellular Component: vacuolar membrane (GO:0005774);; Cellular Component: plasma membrane (GO:0005886);; Biological Process: drug transmembrane transport (GO:0006855);; Biological Process: response to symbiotic fungus (GO:0009610);; Molecular Function: drug transmembrane transporter activity (GO:0015238);; Molecular Function: antiporter activity (GO:0015297);; Biological Process: proline transport…	--	Protein TRANSPARENT TESTA 12 OS=Arabidopsis thaliana GN=TT12 PE=2 SV=1	MATE efflux family protein isoform 1 [Theobroma cacao]
comp10364_c0	1	p1	(T)12	12	3517	3528	--	--	Molecular Function: G-protein coupled GABA receptor activity (GO:0004965);; Molecular Function: ionotropic glutamate receptor activity (GO:0004970);; Molecular Function: intracellular ligand-gated ion channel activity (GO:0005217);; Molecular Function: extracellular-glutamate-gated ion channel activity (GO:0005234);; Molecular Function: calcium channel activity (GO:0005262);; Biological Process: …	--	Glutamate receptor 3.1 OS=Oryza sativa subsp. japonica GN=GLR3.1 PE=1 SV=1	Glutamate receptor 3.3 isoform 1 [Theobroma cacao]
comp10369_c0	1	p1	(T)10	10	3789	3798	[P]	Inorganic ion transport and metabolism	Molecular Function: calcium-transporting ATPase activity (GO:0005388);; Molecular Function: ATP binding (GO:0005524);; Biological Process: ATP biosynthetic process (GO:0006754);; Biological Process: calcium ion transport (GO:0006816);; Molecular Function: transferase activity, transferring hexosyl groups (GO:0016758);; Cellular Component: integral component of endoplasmic reticulum membrane (GO:0…	--	Calcium-transporting ATPase, endoplasmic reticulum-type OS=Solanum lycopersicum GN=LCA1 PE=2 SV=1	PREDICTED: calcium-transporting ATPase, endoplasmic reticulum-type-like [Vitis vinifera]
comp10371_c0	1	p1	(A)11	11	301	311	#N/A	#N/A	#N/A	#N/A	#N/A	#N/A
comp10375_c0	1	p2	(CT)7	14	85	98	[I]	Lipid transport and metabolism	Molecular Function: iron ion binding (GO:0005506);; Biological Process: acetyl-CoA metabolic process (GO:0006084);; Biological Process: chromatin assembly or disassembly (GO:0006333);; Biological Process: fatty acid biosynthetic process (GO:0006633);; Cellular Component: chloroplast envelope (GO:0009941);; Cellular Component: integral component of membrane (GO:0016021);; Biological Process: stero…	K14424|2e-49|rcu:RCOM_0732630|C-4 methyl sterol oxidase, putative (EC:1.14.13.72)	Methylsterol monooxygenase 2-2 OS=Arabidopsis thaliana GN=SMO2-2 PE=2 SV=1	hypothetical protein PRUPE_ppa009301mg [Prunus persica]
comp10376_c0	1	p1	(A)10	10	1020	1029	--	--	--	--	Uncharacterized protein LOC284861 OS=Homo sapiens PE=2 SV=1	hypothetical protein SORBIDRAFT_01g006140 [Sorghum bicolor]
comp10382_c0	1	p3	(CAT)5	15	704	718	--	--	Cellular Component: nucleus (GO:0005634);; Biological Process: fatty acid beta-oxidation (GO:0006635);; Biological Process: protein import into peroxisome matrix (GO:0016558);; Biological Process: photoperiodism, flowering (GO:0048573);;	--	--	Uncharacterized protein isoform 1 [Theobroma cacao]
comp10383_c0	1	p1	(T)15	15	2	16	#N/A	#N/A	#N/A	#N/A	#N/A	#N/A
comp10386_c0	1	p1	(T)14	14	198	211	--	--	Cellular Component: nucleus (GO:0005634);;	--	Uncharacterized protein DKFZp434B061 OS=Homo sapiens PE=2 SV=2	predicted protein [Populus trichocarpa]
comp10387_c0	1	p2	(AG)10	20	2217	2236	--	--	Cellular Component: mitochondrion (GO:0005739);; Biological Process: pentose-phosphate shunt (GO:0006098);; Biological Process: rRNA processing (GO:0006364);; Biological Process: tRNA metabolic process (GO:0006399);; Cellular Component: chloroplast (GO:0009507);; Biological Process: chloroplast organization (GO:0009658);;	--	Pentatricopeptide repeat-containing protein At3g59040 OS=Arabidopsis thaliana GN=At3g59040 PE=2 SV=2	hypothetical protein SORBIDRAFT_07g005470 [Sorghum bicolor]
comp10391_c0	1	p2	(AG)8	16	173	188	--	--	Cellular Component: plasma membrane (GO:0005886);; Molecular Function: methyltransferase activity (GO:0008168);; Biological Process: methylation (GO:0032259);;	--	Endothelin-converting enzyme 2 OS=Bos taurus GN=ECE2 PE=1 SV=2	unknown protein [Oryza sativa Japonica Group]
comp10392_c0	1	p2	(TC)6	12	17	28	--	--	Biological Process: negative regulation of cell proliferation (GO:0008285);;	--	Cell number regulator 2 OS=Zea mays GN=CNR2 PE=2 SV=1	PREDICTED: cell number regulator 2-like [Setaria italica]
comp10393_c0	1	c	(GA)7---(A)11	64	3738	3801	[V]	Defense mechanisms	Molecular Function: ATP binding (GO:0005524);; Cellular Component: plasma membrane (GO:0005886);; Biological Process: ATP catabolic process (GO:0006200);; Molecular Function: xenobiotic-transporting ATPase activity (GO:0008559);; Cellular Component: cytoplasmic membrane-bounded vesicle (GO:0016023);;	--	ABC transporter G family member 28 OS=Arabidopsis thaliana GN=ABCG28 PE=3 SV=1	PREDICTED: ABC transporter G family member 28-like [Vitis vinifera]
comp10394_c0	1	p1	(T)10	10	914	923	--	--	--	--	Leucine-rich repeat extensin-like protein 3 OS=Arabidopsis thaliana GN=LRX3 PE=1 SV=1	unnamed protein product [Vitis vinifera]
comp10395_c0	1	p2	(TC)7	14	22	35	#N/A	#N/A	#N/A	#N/A	#N/A	#N/A
comp10400_c0	1	p1	(T)12	12	1847	1858	--	--	Molecular Function: transcription cofactor activity (GO:0003712);; Biological Process: regulation of transcription, DNA-templated (GO:0006355);;	--	--	PREDICTED: uncharacterized protein LOC100250879 [Vitis vinifera]
comp10404_c0	1	p1	(A)14	14	843	856	--	--	--	--	Putative disease resistance protein RGA3 OS=Solanum bulbocastanum GN=RGA3 PE=2 SV=2	leucine-rich repeat-containing protein, putative [Ricinus communis]
comp10405_c0	1	p2	(AG)10	20	2453	2472	[G]	Carbohydrate transport and metabolism	Biological Process: maltose metabolic process (GO:0000023);; Biological Process: response to hypoxia (GO:0001666);; Molecular Function: starch synthase activity (GO:0009011);; Cellular Component: chloroplast stroma (GO:0009570);; Biological Process: defense response, incompatible interaction (GO:0009814);; Biological Process: salicylic acid mediated signaling pathway (GO:0009863);; Biological Pro…	K00703|0.0|vvi:100250417|hypothetical protein LOC100250417	Starch synthase 1, chloroplastic/amyloplastic OS=Arabidopsis thaliana GN=SS1 PE=2 SV=1	soluble starch synthase I [Colocasia esculenta]
comp10406_c0	1	p1	(T)12	12	1177	1188	--	--	--	--	--	PREDICTED: uncharacterized protein LOC100799543 [Glycine max]
comp10409_c0	1	p2	(CT)9	18	1	18	--	--	Biological Process: cellular process (GO:0009987);; Biological Process: single-organism process (GO:0044699);;	--	Protein EARLY FLOWERING 3 OS=Arabidopsis thaliana GN=ELF3 PE=1 SV=1	Hydroxyproline-rich glycoprotein family protein, putative [Theobroma cacao]
comp10410_c0	1	p2	(CT)8	16	8	23	--	--	--	--	--	putative vacuolar cation/proton exchanger [Wolffia arrhiza]
comp10411_c0	1	p3	(GCA)5	15	680	694	--	--	--	--	Putative disease resistance RPP13-like protein 1 OS=Arabidopsis thaliana GN=RPPL1 PE=3 SV=1	hypothetical protein VITISV_018147 [Vitis vinifera]
comp10413_c0	2	p1	(T)11	11	1307	1317	--	--	Cellular Component: mitochondrion (GO:0005739);;	--	Vegetative cell wall protein gp1 OS=Chlamydomonas reinhardtii GN=GP1 PE=2 SV=1	hypothetical protein PRUPE_ppa013616mg [Prunus persica]
comp10413_c0	1	p2	(AG)9	18	1	18	--	--	Cellular Component: mitochondrion (GO:0005739);;	--	Vegetative cell wall protein gp1 OS=Chlamydomonas reinhardtii GN=GP1 PE=2 SV=1	hypothetical protein PRUPE_ppa013616mg [Prunus persica]
comp10414_c0	1	p1	(A)11	11	172	182	--	--	Biological Process: protein folding (GO:0006457);; Biological Process: phosphatidylinositol biosynthetic process (GO:0006661);; Cellular Component: chloroplast (GO:0009507);;	--	--	PREDICTED: uncharacterized protein LOC101752676 [Setaria italica]
comp10415_c0	1	p1	(A)16	16	21	36	--	--	--	--	--	predicted protein [Populus trichocarpa]
comp10421_c0	1	c	(T)13---(A)10	88	1552	1639	--	--	Biological Process: response to hypoxia (GO:0001666);; Biological Process: systemic acquired resistance, salicylic acid mediated signaling pathway (GO:0009862);; Biological Process: xylem development (GO:0010089);; Biological Process: regulation of hydrogen peroxide metabolic process (GO:0010310);; Biological Process: cell wall macromolecule metabolic process (GO:0044036);;	K10712|1e-105|vvi:100266451|hypothetical protein LOC100266451	2-aminoethanethiol dioxygenase OS=Mus musculus GN=Ado PE=1 SV=2	PREDICTED: 2-aminoethanethiol dioxygenase isoform 2 [Vitis vinifera]
comp10424_c0	1	p3	(AGC)6	18	2363	2380	--	--	--	--	Protein FAR1-RELATED SEQUENCE 7 OS=Arabidopsis thaliana GN=FRS7 PE=2 SV=1	PREDICTED: uncharacterized protein LOC100841807 [Brachypodium distachyon]
comp10431_c0	1	p2	(GC)7	14	174	187	--	--	--	--	Vacuolar protein sorting-associated protein 24 homolog 1 OS=Arabidopsis thaliana GN=VPS24-1 PE=2 SV=1	TPA: hypothetical protein ZEAMMB73_817857 [Zea mays]
comp10435_c0	1	p1	(G)11	11	10	20	#N/A	#N/A	#N/A	#N/A	#N/A	#N/A
comp10436_c0	1	p3	(CCT)5	15	2504	2518	[RTKL]	--	Molecular Function: nucleic acid binding (GO:0003676);; Molecular Function: protein serine/threonine kinase activity (GO:0004674);; Molecular Function: protein tyrosine kinase activity (GO:0004713);; Molecular Function: ATP binding (GO:0005524);; Biological Process: protein phosphorylation (GO:0006468);;	--	Serine/threonine-protein kinase ULK3 OS=Gallus gallus GN=ULK3 PE=2 SV=1	PREDICTED: serine/threonine-protein kinase atg1-like isoform X3 [Setaria italica]
comp10438_c0	1	p1	(G)11	11	2738	2748	--	--	Cellular Component: chloroplast (GO:0009507);;	--	Protein DENND6A OS=Homo sapiens GN=DENND6A PE=1 SV=1	PREDICTED: protein DENND6B-like [Setaria italica]
comp1044_c0	1	p1	(A)10	10	446	455	--	--	Molecular Function: structural molecule activity (GO:0005198);; Cellular Component: cytosol (GO:0005829);; Biological Process: N-terminal protein myristoylation (GO:0006499);; Biological Process: intracellular protein transport (GO:0006886);; Biological Process: ER to Golgi vesicle-mediated transport (GO:0006888);; Biological Process: Golgi organization (GO:0007030);; Biological Process: vacuole …	--	Clathrin light chain 1 OS=Oryza sativa subsp. japonica GN=Os04g0679100 PE=2 SV=1	hypothetical protein MTR_2g013220 [Medicago truncatula]
comp10441_c0	1	p3	(TGA)6	18	1791	1808	--	--	--	--	Transcription factor bHLH66 OS=Arabidopsis thaliana GN=BHLH66 PE=2 SV=1	Transcription factor bHLH69, putative isoform 1 [Theobroma cacao]
comp10443_c0	1	p1	(T)10	10	1027	1036	--	--	Biological Process: transcription, DNA-templated (GO:0006351);; Cellular Component: plastid (GO:0009536);; Molecular Function: metal ion binding (GO:0046872);;	--	B3 domain-containing protein Os07g0563300 OS=Oryza sativa subsp. japonica GN=Os07g0563300 PE=2 SV=2	hypothetical protein PRUPE_ppa001220mg [Prunus persica]
comp10452_c0	1	p3	(GGC)5	15	2259	2273	--	--	Molecular Function: transmembrane receptor protein serine/threonine kinase activity (GO:0004675);; Molecular Function: ATP binding (GO:0005524);; Cellular Component: extracellular region (GO:0005576);; Cellular Component: mitochondrion (GO:0005739);; Cellular Component: plasma membrane (GO:0005886);; Biological Process: protein phosphorylation (GO:0006468);; Biological Process: signal transductio…	--	Probable receptor protein kinase TMK1 OS=Arabidopsis thaliana GN=TMK1 PE=1 SV=1	TMK [Oryza sativa Indica Group]
comp1046_c0	1	p1	(T)10	10	1827	1836	[O]	Posttranslational modification, protein turnover, chaperones	Molecular Function: ATP binding (GO:0005524);; Cellular Component: cytosol (GO:0005829);; Cellular Component: plasma membrane (GO:0005886);; Biological Process: rRNA processing (GO:0006364);; Biological Process: protein folding (GO:0006457);; Cellular Component: plasmodesma (GO:0009506);; Molecular Function: unfolded protein binding (GO:0051082);;	K09497|0.0|sbi:SORBI_02g001450|hypothetical protein	T-complex protein 1 subunit epsilon OS=Arabidopsis thaliana GN=At1g24510 PE=2 SV=1	hypothetical protein SORBIDRAFT_02g001450 [Sorghum bicolor]
comp10460_c0	1	p1	(A)14	14	4	17	[J]	Translation, ribosomal structure and biogenesis	Cellular Component: exosome (RNase complex) (GO:0000178);; Molecular Function: RNA binding (GO:0003723);; Molecular Function: structural constituent of ribosome (GO:0003735);; Molecular Function: exonuclease activity (GO:0004527);; Cellular Component: ribosome (GO:0005840);; Biological Process: translation (GO:0006412);; Cellular Component: chloroplast (GO:0009507);;	K03681|1e-131|vvi:100241656|hypothetical protein LOC100241656	Putative exosome complex component rrp40 OS=Dictyostelium discoideum GN=exosc3 PE=3 SV=1	PREDICTED: putative exosome complex component rrp40 [Vitis vinifera]
comp10461_c0	1	p3	(GCA)5	15	1707	1721	--	--	--	--	Pathogenesis-related genes transcriptional activator PTI6 OS=Solanum lycopersicum GN=PTI6 PE=2 SV=1	PREDICTED: ethylene-responsive transcription factor CRF4-like [Brachypodium distachyon]
comp10461_c0	2	p3	(GGT)6	18	2008	2025	--	--	--	--	Pathogenesis-related genes transcriptional activator PTI6 OS=Solanum lycopersicum GN=PTI6 PE=2 SV=1	PREDICTED: ethylene-responsive transcription factor CRF4-like [Brachypodium distachyon]
comp10469_c0	1	p3	(GCC)5	15	603	617	[RTKL]	--	Biological Process: cellular process (GO:0009987);; Molecular Function: kinase activity (GO:0016301);;	--	Putative receptor protein kinase ZmPK1 OS=Zea mays GN=PK1 PE=2 SV=2	hypothetical protein PRUPE_ppa018327mg [Prunus persica]
comp10470_c0	1	p2	(CT)9	18	500	517	--	--	Biological Process: protein targeting to membrane (GO:0006612);; Biological Process: heat acclimation (GO:0010286);; Biological Process: regulation of plant-type hypersensitive response (GO:0010363);; Biological Process: endoplasmic reticulum unfolded protein response (GO:0030968);; Biological Process: negative regulation of programmed cell death (GO:0043069);;	--	--	PREDICTED: uncharacterized protein LOC100800541 [Glycine max]
comp10472_c0	1	p1	(T)16	16	3	18	--	--	--	--	--	unnamed protein product [Vitis vinifera]
comp10472_c0	2	p1	(A)10	10	913	922	--	--	--	--	--	unnamed protein product [Vitis vinifera]
comp10477_c0	1	p2	(TC)9	18	2840	2857	--	--	Cellular Component: plastid (GO:0009536);; Biological Process: cellular process (GO:0009987);;	--	--	conserved hypothetical protein [Ricinus communis]
comp10478_c0	1	p3	(GCC)6	18	282	299	[G]	Carbohydrate transport and metabolism	Cellular Component: mitochondrion (GO:0005739);; Cellular Component: chloroplast (GO:0009507);; Molecular Function: carbon-carbon lyase activity (GO:0016830);;	--	2-keto-3-deoxy-L-rhamnonate aldolase OS=Escherichia coli (strain SMS-3-5 / SECEC) GN=rhmA PE=3 SV=1	putative HpcH/HpaI aldolase/citrate lyase [Arachis duranensis]
comp10478_c0	2	p3	(CCG)5	15	601	615	[G]	Carbohydrate transport and metabolism	Cellular Component: mitochondrion (GO:0005739);; Cellular Component: chloroplast (GO:0009507);; Molecular Function: carbon-carbon lyase activity (GO:0016830);;	--	2-keto-3-deoxy-L-rhamnonate aldolase OS=Escherichia coli (strain SMS-3-5 / SECEC) GN=rhmA PE=3 SV=1	putative HpcH/HpaI aldolase/citrate lyase [Arachis duranensis]
comp10482_c0	1	p1	(A)10	10	77	86	[R]	General function prediction only	Biological Process: pentose-phosphate shunt (GO:0006098);; Cellular Component: chloroplast stroma (GO:0009570);; Cellular Component: chloroplast envelope (GO:0009941);; Biological Process: thylakoid membrane organization (GO:0010027);; Biological Process: stomatal complex morphogenesis (GO:0010103);; Biological Process: carotenoid biosynthetic process (GO:0016117);; Molecular Function: hydrolase …	--	Protein CbbY OS=Rhodobacter sphaeroides GN=cbbY PE=3 SV=1	Os03g0565200 [Oryza sativa Japonica Group]
comp10485_c0	1	p3	(GTC)5	15	1403	1417	--	--	--	--	Serine/arginine repetitive matrix protein 2 OS=Homo sapiens GN=SRRM2 PE=1 SV=2	Sequence-specific DNA binding transcription factors [Theobroma cacao]
comp10494_c0	1	p1	(A)12	12	108	119	--	--	--	--	--	PREDICTED: uncharacterized protein LOC100261483 [Vitis vinifera]
comp10499_c0	1	p1	(A)13	13	146	158	[E]	Amino acid transport and metabolism	Molecular Function: glycine hydroxymethyltransferase activity (GO:0004372);; Biological Process: glycine metabolic process (GO:0006544);; Biological Process: L-serine metabolic process (GO:0006563);; Molecular Function: methyltransferase activity (GO:0008168);; Molecular Function: electron carrier activity (GO:0009055);; Molecular Function: heme binding (GO:0020037);; Molecular Function: pyridoxa…	K00600|1e-45|sbi:SORBI_03g041410|hypothetical protein	Serine hydroxymethyltransferase 7 OS=Arabidopsis thaliana GN=SHM7 PE=2 SV=1	hypothetical protein ZEAMMB73_757872 [Zea mays]
comp1050_c0	1	p2	(AG)8	16	39	54	--	--	Cellular Component: cell wall (GO:0005618);; Cellular Component: signal peptidase complex (GO:0005787);; Biological Process: signal peptide processing (GO:0006465);; Molecular Function: peptidase activity (GO:0008233);; Cellular Component: integral component of membrane (GO:0016021);; Cellular Component: cytoplasmic membrane-bounded vesicle (GO:0016023);;	K12948|1e-106|vvi:100252902|hypothetical protein LOC100252902	Signal peptidase complex subunit 3B OS=Arabidopsis thaliana GN=At5g27430 PE=2 SV=1	uncharacterized protein LOC100499788 precursor [Glycine max]
comp10508_c0	1	p1	(A)10	10	716	725	[O]	Posttranslational modification, protein turnover, chaperones	Biological Process: protein folding (GO:0006457);; Cellular Component: plastid (GO:0009536);; Biological Process: vegetative to reproductive phase transition of meristem (GO:0010228);; Molecular Function: heat shock protein binding (GO:0031072);; Biological Process: response to very low light intensity stimulus (GO:0055122);;	K09531|0.0|vvi:100259128|hypothetical protein LOC100259128	Chaperone protein dnaJ 13 OS=Arabidopsis thaliana GN=ATJ13 PE=1 SV=2	PREDICTED: chaperone protein dnaJ 13 [Vitis vinifera]
comp10510_c0	1	p3	(CTC)7	21	141	161	[O]	Posttranslational modification, protein turnover, chaperones	Molecular Function: hydrolase activity (GO:0016787);;	--	Subtilisin-like protease SDD1 OS=Arabidopsis thaliana GN=SDD1 PE=2 SV=1	PREDICTED: subtilisin-like protease SDD1 [Vitis vinifera]
comp10511_c0	1	p1	(A)18	18	1	18	#N/A	#N/A	#N/A	#N/A	#N/A	#N/A
comp10512_c0	1	p2	(AG)9	18	1690	1707	[J]	Translation, ribosomal structure and biogenesis	Molecular Function: translation release factor activity (GO:0003747);; Cellular Component: mitochondrion (GO:0005739);; Biological Process: translational termination (GO:0006415);;	--	Peptidyl-tRNA hydrolase ICT1, mitochondrial OS=Homo sapiens GN=ICT1 PE=1 SV=1	PREDICTED: peptidyl-tRNA hydrolase ICT1, mitochondrial [Vitis vinifera]
comp10513_c0	1	p3	(CTC)5	15	1787	1801	[V]	Defense mechanisms	--	--	Histone-lysine N-methyltransferase, H3 lysine-9 specific SUVH1 OS=Nicotiana tabacum GN=SUVH1 PE=1 SV=1	Histone-lysine N-methyltransferase, H3 lysine-9 specific SUVH1 [Triticum urartu]
comp10515_c0	1	p2	(TC)10	20	1	20	#N/A	#N/A	#N/A	#N/A	#N/A	#N/A
comp10520_c0	1	c	(TC)9---(ACT)5	93	1	93	--	--	Cellular Component: membrane (GO:0016020);;	--	Cell wall integrity and stress response component 1 OS=Schizosaccharomyces pombe (strain 972 / ATCC 24843) GN=wsc1 PE=1 SV=3	PREDICTED: uncharacterized LOC101219783 [Cucumis sativus]
comp10520_c0	2	p1	(A)23	23	601	623	--	--	Cellular Component: membrane (GO:0016020);;	--	Cell wall integrity and stress response component 1 OS=Schizosaccharomyces pombe (strain 972 / ATCC 24843) GN=wsc1 PE=1 SV=3	PREDICTED: uncharacterized LOC101219783 [Cucumis sativus]
comp10521_c0	1	p2	(GA)9	18	1	18	--	--	Cellular Component: mitochondrion (GO:0005739);;	--	--	unnamed protein product [Vitis vinifera]
comp10533_c0	1	c	(T)12---(CTC)5	86	18	103	--	--	Molecular Function: DNA binding (GO:0003677);; Biological Process: cellular process (GO:0009987);;	--	--	hypothetical protein PRUPE_ppa007389mg [Prunus persica]
comp10535_c0	1	p3	(GCT)7	21	1	21	--	--	Molecular Function: sequence-specific DNA binding transcription factor activity (GO:0003700);; Cellular Component: nucleus (GO:0005634);; Biological Process: regulation of transcription, DNA-templated (GO:0006355);; Biological Process: leaf morphogenesis (GO:0009965);; Molecular Function: sequence-specific DNA binding (GO:0043565);;	--	BEL1-like homeodomain protein 4 OS=Arabidopsis thaliana GN=BLH4 PE=2 SV=2	unnamed protein product [Vitis vinifera]
comp10540_c0	1	p2	(CT)10	20	1	20	[T]	Signal transduction mechanisms	Molecular Function: protein serine/threonine phosphatase activity (GO:0004722);; Cellular Component: mitochondrion (GO:0005739);; Biological Process: protein dephosphorylation (GO:0006470);; Cellular Component: integral component of membrane (GO:0016021);; Molecular Function: metal ion binding (GO:0046872);;	--	Probable protein phosphatase 2C 60 OS=Oryza sativa subsp. japonica GN=Os06g0717800 PE=2 SV=1	predicted protein [Populus trichocarpa]
comp10542_c0	1	p2	(AG)10	20	1	20	--	--	Cellular Component: nucleus (GO:0005634);; Biological Process: intracellular protein transport (GO:0006886);; Biological Process: vacuolar transport (GO:0007034);; Cellular Component: retromer complex (GO:0030904);; Biological Process: retrograde transport, endosome to Golgi (GO:0042147);; Biological Process: photoperiodism, flowering (GO:0048573);;	--	Down syndrome critical region protein 3 homolog OS=Mus musculus GN=Dscr3 PE=2 SV=1	PREDICTED: Down syndrome critical region protein 3-like [Cucumis sativus]
comp1055_c0	1	p1	(G)10	10	1	10	--	--	--	--	--	PREDICTED: uncharacterized protein LOC100243132 [Vitis vinifera]
comp1055_c0	2	p2	(TA)8	16	178	193	--	--	--	--	--	PREDICTED: uncharacterized protein LOC100243132 [Vitis vinifera]
comp10551_c0	1	p1	(T)12	12	2175	2186	--	--	--	--	Serine/threonine-protein phosphatase 7 long form homolog OS=Arabidopsis thaliana GN=At1g48120 PE=2 SV=1	PREDICTED: uncharacterized protein LOC100852441 [Vitis vinifera]
comp10552_c0	1	p1	(A)10	10	41	50	[L]	Replication, recombination and repair	Molecular Function: catalytic activity (GO:0003824);; Cellular Component: plastid (GO:0009536);;	--	5&apos;-3&apos; exonuclease OS=Aquifex aeolicus (strain VF5) GN=aq_1628 PE=3 SV=1	PREDICTED: 5&apos;-3&apos; exonuclease-like [Vitis vinifera]
comp10555_c0	1	p2	(AT)10	20	1624	1643	[H]	Coenzyme transport and metabolism	Cellular Component: cytosol (GO:0005829);; Molecular Function: 8-amino-7-oxononanoate synthase activity (GO:0008710);; Biological Process: biotin biosynthetic process (GO:0009102);;	K00652|1e-166|vvi:100268118|hypothetical protein LOC100268118	8-amino-7-oxononanoate synthase OS=Anaeromyxobacter dehalogenans (strain 2CP-1 / ATCC BAA-258) GN=bioF PE=3 SV=1	PREDICTED: 8-amino-7-oxononanoate synthase [Vitis vinifera]
comp10556_c0	1	p2	(AG)7	14	55	68	--	--	Molecular Function: anion channel activity (GO:0005253);; Cellular Component: plant-type vacuole membrane (GO:0009705);; Biological Process: malate transport (GO:0015743);;	--	Aluminum-activated malate transporter 9 OS=Arabidopsis thaliana GN=ALMT9 PE=2 SV=1	PREDICTED: aluminum-activated malate transporter 9-like [Glycine max]
comp10556_c0	2	p2	(CT)9	18	2177	2194	--	--	Molecular Function: anion channel activity (GO:0005253);; Cellular Component: plant-type vacuole membrane (GO:0009705);; Biological Process: malate transport (GO:0015743);;	--	Aluminum-activated malate transporter 9 OS=Arabidopsis thaliana GN=ALMT9 PE=2 SV=1	PREDICTED: aluminum-activated malate transporter 9-like [Glycine max]
comp10559_c0	1	p1	(A)10	10	235	244	[R]	General function prediction only	Molecular Function: GTP binding (GO:0005525);; Cellular Component: nucleus (GO:0005634);; Molecular Function: ferrous iron transmembrane transporter activity (GO:0015093);; Biological Process: ferrous iron transport (GO:0015684);; Cellular Component: integral component of membrane (GO:0016021);;	--	Nucleolar GTP-binding protein 1 OS=Mus musculus GN=Gtpbp4 PE=2 SV=3	hypothetical protein PRUPE_ppa005854mg [Prunus persica]
comp10560_c0	1	p1	(T)10	10	1953	1962	#N/A	#N/A	#N/A	#N/A	#N/A	#N/A
comp10563_c0	1	p3	(CCG)5	15	18	32	[R]	General function prediction only	Molecular Function: RNA binding (GO:0003723);; Molecular Function: GTP binding (GO:0005525);; Cellular Component: mitochondrion (GO:0005739);; Cellular Component: cytosol (GO:0005829);; Biological Process: endocytosis (GO:0006897);; Cellular Component: chloroplast (GO:0009507);;	--	GTP-binding protein ERG OS=Arabidopsis thaliana GN=ERG PE=1 SV=2	unknown [Zea mays]
comp10563_c0	2	p3	(GGA)5	15	223	237	[R]	General function prediction only	Molecular Function: RNA binding (GO:0003723);; Molecular Function: GTP binding (GO:0005525);; Cellular Component: mitochondrion (GO:0005739);; Cellular Component: cytosol (GO:0005829);; Biological Process: endocytosis (GO:0006897);; Cellular Component: chloroplast (GO:0009507);;	--	GTP-binding protein ERG OS=Arabidopsis thaliana GN=ERG PE=1 SV=2	unknown [Zea mays]
comp10567_c0	1	p2	(GA)8	16	659	674	#N/A	#N/A	#N/A	#N/A	#N/A	#N/A
comp10570_c0	1	p1	(T)10	10	198	207	--	--	--	--	E3 ubiquitin-protein ligase At3g02290 OS=Arabidopsis thaliana GN=At3g02290 PE=2 SV=1	protein binding protein, putative [Ricinus communis]
comp10572_c0	1	p3	(CCG)5	15	13	27	[M]	Cell wall/membrane/envelope biogenesis	Molecular Function: binding (GO:0005488);; Biological Process: actin cytoskeleton organization (GO:0030036);;	--	Formin-1 OS=Mus musculus GN=Fmn1 PE=1 SV=2	cytokinesis protein SepA/Bni1 [Talaromyces stipitatus ATCC 10500]
comp10574_c0	1	p2	(AT)8	16	1671	1686	[G]	Carbohydrate transport and metabolism	Molecular Function: xylulokinase activity (GO:0004856);; Biological Process: carbohydrate metabolic process (GO:0005975);; Cellular Component: chloroplast (GO:0009507);; Biological Process: phosphorylation (GO:0016310);;	--	D-xylulose kinase OS=Staphylococcus epidermidis (strain ATCC 35984 / RP62A) GN=xylB PE=3 SV=1	hypothetical protein VITISV_005731 [Vitis vinifera]
comp10579_c0	1	p3	(GAC)5	15	621	635	[M]	Cell wall/membrane/envelope biogenesis	Cellular Component: membrane (GO:0016020);; Biological Process: single-organism cellular process (GO:0044763);; Biological Process: response to stimulus (GO:0050896);;	--	Mechanosensitive ion channel protein 5 OS=Arabidopsis thaliana GN=MSL5 PE=2 SV=1	hypothetical protein PRUPE_ppa002215mg [Prunus persica]
comp1058_c0	1	p1	(A)12	12	291	302	[RTKL]	--	Molecular Function: protein kinase activity (GO:0004672);;	--	Serine/threonine-protein kinase CTR1 OS=Arabidopsis thaliana GN=CTR1 PE=1 SV=1	PREDICTED: uncharacterized protein LOC100242423 [Vitis vinifera]
comp10590_c0	1	p2	(AG)8	16	151	166	--	--	Biological Process: polysaccharide biosynthetic process (GO:0000271);; Biological Process: tryptophan catabolic process (GO:0006569);; Cellular Component: plant-type cell wall (GO:0009505);; Biological Process: indoleacetic acid biosynthetic process (GO:0009684);; Biological Process: response to abscisic acid (GO:0009737);; Biological Process: response to gibberellin (GO:0009739);; Biological Pro…	--	Snakin-2 OS=Solanum tuberosum GN=SN2 PE=1 SV=1	unknown [Lotus japonicus]
comp10592_c0	1	p1	(G)23	23	1	23	#N/A	#N/A	#N/A	#N/A	#N/A	#N/A
comp10593_c0	1	p3	(GAG)5	15	580	594	--	--	Biological Process: phosphatidylinositol biosynthetic process (GO:0006661);;	--	Transmembrane protein 230 OS=Pongo abelii GN=TMEM230 PE=2 SV=1	PREDICTED: UPF0414 transmembrane protein C20orf30 homolog [Vitis vinifera]
comp10594_c0	1	p3	(GCA)5	15	509	523	--	--	--	--	Heat stress transcription factor A-5 OS=Oryza sativa subsp. japonica GN=HSFA5 PE=2 SV=1	heat stress transcription factor A-5-like protein, partial [Oncidium hybrid cultivar]
comp106_c0	1	p2	(GA)11	22	3233	3254	--	--	Cellular Component: plastid (GO:0009536);;	--	YTH domain family protein 2 OS=Bos taurus GN=YTHDF2 PE=2 SV=1	PREDICTED: uncharacterized protein LOC100253534 [Vitis vinifera]
comp10601_c0	1	p1	(A)11	11	586	596	--	--	Biological Process: pentose-phosphate shunt (GO:0006098);; Biological Process: rRNA processing (GO:0006364);; Cellular Component: chloroplast thylakoid (GO:0009534);; Cellular Component: chloroplast inner membrane (GO:0009706);; Biological Process: thylakoid membrane organization (GO:0010027);; Biological Process: photosystem II assembly (GO:0010207);; Biological Process: chlorophyll biosynthetic…	--	--	PREDICTED: uncharacterized protein LOC100250645 [Vitis vinifera]
comp10603_c0	1	p2	(TC)10	20	1	20	--	--	Cellular Component: Golgi apparatus (GO:0005794);; Molecular Function: ceramide glucosyltransferase activity (GO:0008120);; Cellular Component: membrane (GO:0016020);;	--	--	Nucleotide-diphospho-sugar transferases superfamily protein isoform 1 [Theobroma cacao]
comp10604_c0	1	p1	(A)10	10	436	445	[IQ]	--	Molecular Function: catalytic activity (GO:0003824);; Biological Process: metabolic process (GO:0008152);;	--	Butyrate--CoA ligase AAE11, peroxisomal OS=Arabidopsis thaliana GN=AAE11 PE=1 SV=1	PREDICTED: butyrate--CoA ligase AAE11, peroxisomal-like [Fragaria vesca subsp. vesca]
comp10606_c0	1	p3	(TCG)5	15	1984	1998	--	--	Cellular Component: mitochondrion (GO:0005739);; Cellular Component: chloroplast (GO:0009507);;	--	Calcium uniporter protein, mitochondrial OS=Homo sapiens GN=MCU PE=1 SV=1	hypothetical protein OsI_34211 [Oryza sativa Indica Group]
comp10609_c0	1	p4	(TAGC)5	20	186	205	--	--	Cellular Component: cytoplasmic membrane-bounded vesicle (GO:0016023);;	--	--	PREDICTED: uncharacterized protein LOC100827089 [Brachypodium distachyon]
comp10613_c0	1	p3	(CAA)6	18	1941	1958	[S]	Function unknown	Molecular Function: voltage-gated potassium channel activity (GO:0005249);; Molecular Function: protein binding (GO:0005515);; Cellular Component: extracellular region (GO:0005576);; Cellular Component: nucleus (GO:0005634);; Cellular Component: mitochondrion (GO:0005739);; Cellular Component: vacuole (GO:0005773);; Biological Process: potassium ion transport (GO:0006813);; Cellular Component: vo…	--	FH protein interacting protein FIP2 OS=Arabidopsis thaliana GN=FIP2 PE=1 SV=1	PREDICTED: FH protein interacting protein FIP2-like [Solanum lycopersicum]
comp10616_c0	1	p1	(T)20	20	363	382	#N/A	#N/A	#N/A	#N/A	#N/A	#N/A
comp10621_c0	1	p1	(A)10	10	54	63	#N/A	#N/A	#N/A	#N/A	#N/A	#N/A
comp10621_c0	2	p2	(GA)8	16	253	268	#N/A	#N/A	#N/A	#N/A	#N/A	#N/A
comp10629_c0	1	p3	(GCC)5	15	1	15	[J]	Translation, ribosomal structure and biogenesis	--	--	Serine/arginine repetitive matrix protein 2 OS=Homo sapiens GN=SRRM2 PE=1 SV=2	hypothetical protein RCOM_1355450 [Ricinus communis]
comp10632_c0	1	c	(TC)10---(CT)7	59	1	59	[J]	Translation, ribosomal structure and biogenesis	Biological Process: cellular process (GO:0009987);;	--	Translation initiation factor IF-2 OS=Streptomyces coelicolor (strain ATCC BAA-471 / A3(2) / M145) GN=infB PE=3 SV=1	hypothetical protein PRUPE_ppa012774mg [Prunus persica]
comp10633_c0	1	p2	(AG)7	14	433	446	--	--	Cellular Component: Golgi apparatus (GO:0005794);; Cellular Component: integral component of membrane (GO:0016021);;	--	Transmembrane 9 superfamily member 1 OS=Rattus norvegicus GN=Tm9sf1 PE=2 SV=1	putative transmembrane 9 superfamily member 3 protein [Elaeis guineensis]
comp10638_c0	1	p2	(AG)10	20	1216	1235	--	--	Molecular Function: aminopeptidase activity (GO:0004177);; Biological Process: proteolysis (GO:0006508);;	K07018|1e-112|vvi:100251931|hypothetical protein LOC100251931	--	hypothetical protein PRUPE_ppa011119mg [Prunus persica]
comp1064_c0	1	p2	(GA)6	12	1661	1672	[T]	Signal transduction mechanisms	Molecular Function: protein serine/threonine phosphatase activity (GO:0004722);; Cellular Component: plasma membrane (GO:0005886);; Biological Process: protein dephosphorylation (GO:0006470);; Biological Process: response to abscisic acid (GO:0009737);; Molecular Function: metal ion binding (GO:0046872);;	K01090|0.0|rcu:RCOM_0920800|protein phosphatase 2c, putative (EC:3.1.3.16)	Probable protein phosphatase 2C 58 OS=Oryza sativa subsp. japonica GN=Os06g0651600 PE=2 SV=1	protein phosphatase 2c, putative [Ricinus communis]
comp10643_c0	2	p2	(GA)8	16	3241	3256	--	--	--	--	Germ cell-less protein-like 1 OS=Mus musculus GN=Gmcl1 PE=1 SV=2	BTB/POZ domain-containing protein isoform 1 [Theobroma cacao]
comp10643_c0	1	p3	(GCT)5	15	2840	2854	--	--	--	--	Germ cell-less protein-like 1 OS=Mus musculus GN=Gmcl1 PE=1 SV=2	BTB/POZ domain-containing protein isoform 1 [Theobroma cacao]
comp10645_c0	1	p3	(GTT)5	15	4119	4133	--	--	--	--	--	predicted protein [Populus trichocarpa]
comp10656_c0	1	p1	(T)19	19	2922	2940	--	--	--	--	Protein FAR1-RELATED SEQUENCE 5 OS=Arabidopsis thaliana GN=FRS5 PE=2 SV=1	hypothetical protein CARUB_v10028009mg [Capsella rubella]
comp10658_c0	1	p3	(TCC)5	15	1724	1738	[E]	Amino acid transport and metabolism	Biological Process: amino acid transmembrane transport (GO:0003333);; Cellular Component: plasma membrane (GO:0005886);; Biological Process: glucose catabolic process (GO:0006007);; Biological Process: response to ozone (GO:0010193);; Molecular Function: amino acid transmembrane transporter activity (GO:0015171);; Cellular Component: integral component of membrane (GO:0016021);; Biological Proces…	K14209|0.0|vvi:100252511|hypothetical protein LOC100252511	Proton-coupled amino acid transporter 3 OS=Homo sapiens GN=SLC36A3 PE=2 SV=2	PREDICTED: proton-coupled amino acid transporter 1-like [Vitis vinifera]
comp10671_c0	1	p1	(A)10	10	2885	2894	--	--	--	--	Transcription factor PIF3 OS=Arabidopsis thaliana GN=PIF3 PE=1 SV=1	PREDICTED: transcription factor PIF3-like [Vitis vinifera]
comp1068_c0	1	p2	(CT)9	18	2099	2116	[T]	Signal transduction mechanisms	Molecular Function: carboxypeptidase activity (GO:0004180);; Cellular Component: vacuole (GO:0005773);; Cellular Component: plasma membrane (GO:0005886);; Biological Process: proteolysis (GO:0006508);; Molecular Function: serine-type peptidase activity (GO:0008236);; Cellular Component: plant-type cell wall (GO:0009505);; Biological Process: megagametogenesis (GO:0009561);; Cellular Component: cy…	--	Serine/threonine-protein phosphatase PP1 OS=Oryza sativa subsp. japonica GN=Os03g0268000 PE=2 SV=2	Serine carboxypeptidase S28 family protein [Theobroma cacao]
comp10687_c0	1	p3	(GGC)5	15	508	522	--	--	--	--	Fasciclin-like arabinogalactan protein 3 OS=Arabidopsis thaliana GN=FLA3 PE=2 SV=1	conserved hypothetical protein [Ricinus communis]
comp10687_c0	2	p3	(GAG)6	18	1026	1043	--	--	--	--	Fasciclin-like arabinogalactan protein 3 OS=Arabidopsis thaliana GN=FLA3 PE=2 SV=1	conserved hypothetical protein [Ricinus communis]
comp10688_c0	1	p3	(TTC)5	15	1	15	#N/A	#N/A	#N/A	#N/A	#N/A	#N/A
comp10689_c0	1	p2	(GA)9	18	1	18	[S]	Function unknown	Biological Process: metabolic process (GO:0008152);; Cellular Component: plastid (GO:0009536);;	--	Pyridoxine/pyridoxamine 5&apos;-phosphate oxidase 2 OS=Arabidopsis thaliana GN=PPOX2 PE=1 SV=2	PREDICTED: pyridoxine/pyridoxamine 5&apos;-phosphate oxidase [Vitis vinifera]
comp10702_c0	1	p1	(A)11	11	760	770	--	--	Cellular Component: membrane (GO:0016020);;	--	Myb family transcription factor APL OS=Arabidopsis thaliana GN=APL PE=2 SV=2	predicted protein [Hordeum vulgare subsp. vulgare]
comp10704_c0	1	p3	(AGA)5	15	1742	1756	--	--	Biological Process: apoptotic process (GO:0006915);; Cellular Component: intracellular part (GO:0044424);;	--	BTB/POZ domain-containing protein At3g19850 OS=Arabidopsis thaliana GN=At3g19850 PE=2 SV=1	PREDICTED: BTB/POZ domain-containing protein At3g19850 [Vitis vinifera]
comp10706_c0	1	p3	(CCT)6	18	283	300	--	--	Molecular Function: nucleotide binding (GO:0000166);; Molecular Function: protein kinase activity (GO:0004672);; Cellular Component: nucleus (GO:0005634);; Biological Process: protein phosphorylation (GO:0006468);; Biological Process: defense response (GO:0006952);; Cellular Component: plastid (GO:0009536);; Biological Process: response to fungus (GO:0009620);;	--	--	unnamed protein product [Vitis vinifera]
comp10719_c0	1	p2	(GA)10	20	411	430	#N/A	#N/A	#N/A	#N/A	#N/A	#N/A
comp10722_c0	1	p3	(GAG)5	15	520	534	--	--	Biological Process: response to salt stress (GO:0009651);; Biological Process: response to abscisic acid (GO:0009737);;	--	--	Nuclear factor 1 A-type isoform 2 [Theobroma cacao]
comp10723_c0	1	p3	(GAC)5	15	300	314	--	--	Molecular Function: rDNA binding (GO:0000182);; Cellular Component: nucleus (GO:0005634);; Biological Process: regulation of transcription, DNA-templated (GO:0006355);; Cellular Component: plastid outer membrane (GO:0009527);; Biological Process: stomatal lineage progression (GO:0010440);;	--	Transcription initiation factor IIB OS=Xenopus laevis GN=gtf2b PE=2 SV=1	PREDICTED: uncharacterized protein LOC100256546 [Vitis vinifera]
comp10725_c0	1	c	(C)11(A)12	23	1	23	[E]	Amino acid transport and metabolism	Molecular Function: aminopeptidase activity (GO:0004177);; Cellular Component: mitochondrion (GO:0005739);; Biological Process: proteolysis (GO:0006508);; Molecular Function: metalloexopeptidase activity (GO:0008235);; Biological Process: cellular process (GO:0009987);; Molecular Function: dipeptidase activity (GO:0016805);; Molecular Function: manganese ion binding (GO:0030145);;	K01262|0.0|vvi:100240821|hypothetical protein LOC100240821	Probable Xaa-Pro aminopeptidase 3 OS=Rattus norvegicus GN=Xpnpep3 PE=1 SV=1	PREDICTED: probable Xaa-Pro aminopeptidase 3 [Vitis vinifera]
comp10727_c0	1	p1	(A)10	10	179	188	[RTKL]	--	Molecular Function: protein kinase activity (GO:0004672);; Molecular Function: ATP binding (GO:0005524);; Biological Process: protein phosphorylation (GO:0006468);; Biological Process: autophagy (GO:0006914);;	--	Probable receptor-like protein kinase At5g15080 OS=Arabidopsis thaliana GN=At5g15080 PE=1 SV=1	PREDICTED: probable receptor-like protein kinase At5g15080 [Vitis vinifera]
comp1073_c0	2	c	(TG)8(TC)6	28	1359	1386	--	--	Molecular Function: structural molecule activity (GO:0005198);; Cellular Component: plasma membrane (GO:0005886);; Biological Process: response to osmotic stress (GO:0006970);; Cellular Component: plastid (GO:0009536);; Biological Process: response to gibberellin (GO:0009739);;	--	Vesicle-associated protein 4-2 OS=Arabidopsis thaliana GN=PVA42 PE=1 SV=1	PapD-like superfamily protein isoform 1 [Theobroma cacao]
comp1073_c0	1	p3	(CAG)5	15	377	391	--	--	Molecular Function: structural molecule activity (GO:0005198);; Cellular Component: plasma membrane (GO:0005886);; Biological Process: response to osmotic stress (GO:0006970);; Cellular Component: plastid (GO:0009536);; Biological Process: response to gibberellin (GO:0009739);;	--	Vesicle-associated protein 4-2 OS=Arabidopsis thaliana GN=PVA42 PE=1 SV=1	PapD-like superfamily protein isoform 1 [Theobroma cacao]
comp10732_c0	1	p1	(T)18	18	1637	1654	--	--	Biological Process: DNA metabolic process (GO:0006259);; Biological Process: chromatin organization (GO:0006325);; Biological Process: vegetative meristem growth (GO:0010448);; Biological Process: root meristem growth (GO:0010449);; Biological Process: gene expression (GO:0010467);; Biological Process: cellular macromolecule biosynthetic process (GO:0034645);; Biological Process: regulation of ce…	--	Chromatin assembly factor 1 subunit FSM OS=Oryza sativa subsp. japonica GN=FSM PE=2 SV=1	hypothetical protein VITISV_008038 [Vitis vinifera]
comp10739_c0	1	p3	(TTC)6	18	391	408	--	--	Cellular Component: membrane (GO:0016020);; Molecular Function: metal ion binding (GO:0046872);;	--	RING finger and transmembrane domain-containing protein 2 OS=Mus musculus GN=Rnft2 PE=2 SV=2	PREDICTED: RING finger and transmembrane domain-containing protein 2-like [Fragaria vesca subsp. vesca]
comp10744_c0	1	p2	(AG)10	20	1	20	#N/A	#N/A	#N/A	#N/A	#N/A	#N/A
comp10747_c0	1	p1	(T)10	10	875	884	#N/A	#N/A	#N/A	#N/A	#N/A	#N/A
comp10749_c0	1	p2	(AG)10	20	1	20	#N/A	#N/A	#N/A	#N/A	#N/A	#N/A
comp10752_c0	1	p1	(A)12	12	106	117	--	--	--	--	--	PREDICTED: uncharacterized protein LOC100261969 [Vitis vinifera]
comp10754_c0	1	p1	(A)12	12	560	571	#N/A	#N/A	#N/A	#N/A	#N/A	#N/A
comp10757_c0	1	p2	(GA)8	16	1340	1355	--	--	--	--	--	conserved hypothetical protein [Phytophthora infestans T30-4]
comp10757_c0	2	p2	(AG)7	14	2784	2797	--	--	--	--	--	conserved hypothetical protein [Phytophthora infestans T30-4]
comp10761_c0	1	p2	(AG)6	12	50	61	--	--	Biological Process: DNA mediated transformation (GO:0009294);; Biological Process: response to bacterium (GO:0009617);; Molecular Function: mannan synthase activity (GO:0051753);;	K13680|2e-46|pop:POPTR_589559|hypothetical protein	Glucomannan 4-beta-mannosyltransferase 9 OS=Arabidopsis thaliana GN=CSLA9 PE=2 SV=1	Nucleotide-diphospho-sugar transferases superfamily protein isoform 3 [Theobroma cacao]
comp10764_c0	1	c	(GA)9---(A)11	75	2	76	#N/A	#N/A	#N/A	#N/A	#N/A	#N/A
comp10764_c0	2	p1	(G)11	11	542	552	#N/A	#N/A	#N/A	#N/A	#N/A	#N/A
comp10773_c0	1	c	(GTC)7a(TCG)5	37	1	37	--	--	--	--	Uncharacterized protein At3g49140 OS=Arabidopsis thaliana GN=At3g49140 PE=1 SV=2	PREDICTED: uncharacterized protein At3g49140 [Vitis vinifera]
comp10773_c0	2	p3	(GGC)5	15	1106	1120	--	--	--	--	Uncharacterized protein At3g49140 OS=Arabidopsis thaliana GN=At3g49140 PE=1 SV=2	PREDICTED: uncharacterized protein At3g49140 [Vitis vinifera]
comp10778_c0	1	p1	(A)11	11	1617	1627	--	--	--	--	--	PREDICTED: protein-lysine methyltransferase METTL21D-like [Solanum lycopersicum]
comp10778_c0	2	p1	(A)10	10	2200	2209	--	--	--	--	--	PREDICTED: protein-lysine methyltransferase METTL21D-like [Solanum lycopersicum]
comp10781_c0	1	p1	(T)10	10	2610	2619	[KL]	--	Molecular Function: DNA binding (GO:0003677);; Molecular Function: ATP-dependent DNA helicase activity (GO:0004003);; Molecular Function: ATP binding (GO:0005524);; Cellular Component: nucleus (GO:0005634);; Cellular Component: mitochondrion (GO:0005739);; Biological Process: methylation-dependent chromatin silencing (GO:0006346);; Biological Process: cell-cell signaling (GO:0007267);; Biological…	K11136|0.0|vvi:100265202|hypothetical protein LOC100265202	Regulator of telomere elongation helicase 1 OS=Bos taurus GN=RTEL1 PE=2 SV=1	PREDICTED: regulator of telomere elongation helicase 1-like [Vitis vinifera]
comp10784_c0	1	p2	(TC)8	16	229	244	--	--	--	--	Mulatexin OS=Morus alba PE=1 SV=2	Proline-rich receptor protein kinase PERK10 isoform 1 [Theobroma cacao]
comp10784_c0	2	p2	(CT)9	18	516	533	--	--	--	--	Mulatexin OS=Morus alba PE=1 SV=2	Proline-rich receptor protein kinase PERK10 isoform 1 [Theobroma cacao]
comp10785_c0	1	p3	(TCG)5	15	940	954	--	--	--	K13105|8e-88|vvi:100263241|hypothetical protein LOC100263241	ENHANCER OF AG-4 protein 2 OS=Arabidopsis thaliana GN=HUA2 PE=2 SV=1	PREDICTED: uncharacterized protein LOC100263241 [Vitis vinifera]
comp10787_c0	1	p1	(A)12	12	1553	1564	--	--	--	--	LysM and putative peptidoglycan-binding domain-containing protein 2 OS=Xenopus tropicalis GN=lysmd2 PE=2 SV=1	Peptidoglycan-binding LysM domain-containing protein, putative isoform 1 [Theobroma cacao]
comp10791_c0	1	p2	(AG)7	14	399	412	--	--	Cellular Component: chloroplast thylakoid (GO:0009534);;	--	--	predicted protein [Populus trichocarpa]
comp10792_c0	1	p3	(AGC)5	15	103	117	--	--	--	--	--	predicted protein [Populus trichocarpa]
comp10793_c0	1	p3	(CAC)5	15	1091	1105	[L]	Replication, recombination and repair	Molecular Function: DNA binding (GO:0003677);; Cellular Component: nucleus (GO:0005634);; Biological Process: regulation of DNA replication (GO:0006275);; Molecular Function: DNA polymerase processivity factor activity (GO:0030337);; Cellular Component: PCNA complex (GO:0043626);;	K04802|1e-177|vvi:100248466|hypothetical protein LOC100248466	Proliferating cell nuclear antigen OS=Nicotiana tabacum GN=PCNA PE=2 SV=1	PREDICTED: proliferating cell nuclear antigen [Vitis vinifera]
comp10799_c0	1	p1	(A)15	15	620	634	#N/A	#N/A	#N/A	#N/A	#N/A	#N/A
comp10803_c0	1	p1	(T)21	21	1125	1145	--	--	--	--	--	hypothetical protein VITISV_023571 [Vitis vinifera]
comp10808_c0	1	p2	(AG)8	16	1	16	--	--	Biological Process: defense response (GO:0006952);; Biological Process: response to other organism (GO:0051707);;	--	Defensin-1 OS=Pinus sylvestris GN=Def1 PE=1 SV=1	PREDICTED: LOW QUALITY PROTEIN: defensin-like protein 2-like [Brachypodium distachyon]
comp10822_c0	1	p3	(GAA)7	21	1	21	#N/A	#N/A	#N/A	#N/A	#N/A	#N/A
comp10823_c0	1	p3	(TTC)5	15	1305	1319	--	--	Molecular Function: alpha-L-fucosidase activity (GO:0004560);; Biological Process: lipid metabolic process (GO:0006629);; Cellular Component: plant-type cell wall (GO:0009505);;	--	GDSL esterase/lipase At3g26430 OS=Arabidopsis thaliana GN=At3g26430 PE=2 SV=1	PREDICTED: GDSL esterase/lipase At3g26430-like [Solanum lycopersicum]
comp10826_c0	1	p1	(T)10	10	511	520	#N/A	#N/A	#N/A	#N/A	#N/A	#N/A
comp10829_c0	1	p2	(AT)9	18	183	200	--	--	Cellular Component: nucleus (GO:0005634);;	--	Protein LURP-one-related 8 OS=Arabidopsis thaliana GN=At2g38640 PE=2 SV=1	PREDICTED: protein LURP-one-related 8 [Vitis vinifera]
comp10829_c0	2	p3	(TGG)5	15	305	319	--	--	Cellular Component: nucleus (GO:0005634);;	--	Protein LURP-one-related 8 OS=Arabidopsis thaliana GN=At2g38640 PE=2 SV=1	PREDICTED: protein LURP-one-related 8 [Vitis vinifera]
comp10834_c0	1	p3	(TCT)5	15	607	621	#N/A	#N/A	#N/A	#N/A	#N/A	#N/A
comp10838_c0	1	p1	(T)16	16	1088	1103	--	--	--	--	Uncharacterized protein LOC284861 OS=Homo sapiens PE=2 SV=1	Uncharacterized protein TCM_036379 [Theobroma cacao]
comp1084_c0	1	p3	(GCG)5	15	990	1004	[J]	Translation, ribosomal structure and biogenesis	Biological Process: single-organism cellular process (GO:0044763);;	--	Translation initiation factor IF-2 OS=Frankia alni (strain ACN14a) GN=infB PE=3 SV=1	hypothetical protein SORBIDRAFT_01g011230 [Sorghum bicolor]
comp10841_c0	1	p2	(TC)6	12	153	164	--	--	Biological Process: cell communication (GO:0007154);;	--	Sorting nexin-14 OS=Mus musculus GN=Snx14 PE=2 SV=1	hypothetical protein PRUPE_ppa000718mg [Prunus persica]
comp10842_c0	1	p1	(A)10	10	341	350	#N/A	#N/A	#N/A	#N/A	#N/A	#N/A
comp10843_c0	1	p2	(AG)6	12	1	12	--	--	--	--	Uncharacterized protein At2g34160 OS=Arabidopsis thaliana GN=At2g34160 PE=1 SV=1	predicted protein [Populus trichocarpa]
comp10847_c0	1	p3	(AAG)5	15	1704	1718	--	--	Molecular Function: zinc ion binding (GO:0008270);;	--	E3 ubiquitin-protein ligase MARCH8 OS=Mus musculus GN=March8 PE=2 SV=1	PREDICTED: E3 ubiquitin-protein ligase MARCH1 [Vitis vinifera]
comp10848_c0	2	p1	(A)10	10	486	495	#N/A	#N/A	#N/A	#N/A	#N/A	#N/A
comp10848_c0	1	p2	(CA)10	20	1	20	#N/A	#N/A	#N/A	#N/A	#N/A	#N/A
comp1085_c0	1	p3	(GCT)7	21	2438	2458	[K]	Transcription	Cellular Component: mitochondrion (GO:0005739);; Cellular Component: Golgi apparatus (GO:0005794);; Cellular Component: plasma membrane (GO:0005886);; Biological Process: protein folding (GO:0006457);; Molecular Function: protein transporter activity (GO:0008565);; Cellular Component: cytoplasmic membrane-bounded vesicle (GO:0016023);; Cellular Component: integral component of endoplasmic reticul…	K09540|0.0|vvi:100254350|hypothetical protein LOC100254350	CTD small phosphatase-like protein 2-A OS=Danio rerio GN=ctdspl2a PE=2 SV=1	PREDICTED: translocation protein SEC63 homolog [Vitis vinifera]
comp10851_c0	1	p3	(GGA)5	15	1660	1674	--	--	Cellular Component: nucleus (GO:0005634);; Molecular Function: hydrolase activity (GO:0016787);;	--	Tyrosyl-DNA phosphodiesterase 2 OS=Rattus norvegicus GN=Tdp2 PE=2 SV=1	PREDICTED: tyrosyl-DNA phosphodiesterase 2 [Vitis vinifera]
comp10859_c0	1	p2	(AT)9	18	832	849	--	--	--	--	E3 ubiquitin-protein ligase MARCH8 OS=Xenopus tropicalis GN=march8 PE=2 SV=1	RING/FYVE/PHD zinc finger superfamily protein [Theobroma cacao]
comp10859_c0	2	p2	(GA)6	12	1514	1525	--	--	--	--	E3 ubiquitin-protein ligase MARCH8 OS=Xenopus tropicalis GN=march8 PE=2 SV=1	RING/FYVE/PHD zinc finger superfamily protein [Theobroma cacao]
comp1086_c0	1	p3	(TGA)6	18	375	392	--	--	Cellular Component: mitochondrial respiratory chain complex I (GO:0005747);; Cellular Component: vacuolar membrane (GO:0005774);; Cellular Component: plasma membrane (GO:0005886);; Biological Process: glycolysis (GO:0006096);; Biological Process: ubiquitin-dependent protein catabolic process (GO:0006511);; Biological Process: aerobic respiration (GO:0009060);; Cellular Component: chloroplast (GO:…	--	--	Os07g0498300 [Oryza sativa Japonica Group]
comp10860_c0	1	p1	(T)12	12	238	249	--	--	Cellular Component: integral component of membrane (GO:0016021);;	--	--	TMPIT-like protein [Theobroma cacao]
comp10862_c0	1	p2	(CT)6	12	39	50	--	--	--	--	--	Tudor/PWWP/MBT superfamily protein, putative isoform 2 [Theobroma cacao]
comp10863_c0	1	p1	(A)13	13	1231	1243	#N/A	#N/A	#N/A	#N/A	#N/A	#N/A
comp10864_c0	1	p1	(A)10	10	120	129	--	--	Cellular Component: endoplasmic reticulum (GO:0005783);; Cellular Component: membrane (GO:0016020);;	--	Reticulon-like protein B16 OS=Arabidopsis thaliana GN=RTNLB16 PE=2 SV=1	hypothetical protein PRUPE_ppa010739mg [Prunus persica]
comp10865_c0	1	p2	(CT)11	22	382	403	#N/A	#N/A	#N/A	#N/A	#N/A	#N/A
comp10867_c0	1	p1	(T)18	18	1	18	--	--	--	--	Squamosa promoter-binding-like protein 3 OS=Oryza sativa subsp. japonica GN=SPL3 PE=2 SV=1	PREDICTED: squamosa promoter-binding-like protein 12-like [Vitis vinifera]
comp1087_c0	1	p3	(GAG)5	15	2145	2159	--	--	Cellular Component: mitochondrion (GO:0005739);; Cellular Component: endosome (GO:0005768);; Cellular Component: Golgi apparatus (GO:0005794);; Cellular Component: trans-Golgi network (GO:0005802);; Molecular Function: transferase activity, transferring glycosyl groups (GO:0016757);;	--	Uncharacterized protein At1g04910 OS=Arabidopsis thaliana GN=At1g04910 PE=1 SV=1	PREDICTED: DUF246 domain-containing protein At1g04910-like [Vitis vinifera]
comp1087_c1	1	p1	(A)14	14	96	109	[O]	Posttranslational modification, protein turnover, chaperones	--	--	Chaperone protein dnaJ 20, chloroplastic OS=Arabidopsis thaliana GN=ATJ20 PE=2 SV=2	hypothetical protein SORBIDRAFT_02g023210 [Sorghum bicolor]
comp1087_c1	2	p2	(AG)10	20	747	766	[O]	Posttranslational modification, protein turnover, chaperones	--	--	Chaperone protein dnaJ 20, chloroplastic OS=Arabidopsis thaliana GN=ATJ20 PE=2 SV=2	hypothetical protein SORBIDRAFT_02g023210 [Sorghum bicolor]
comp10870_c0	1	p2	(TC)6	12	2937	2948	--	--	Molecular Function: alpha-amylase activity (GO:0004556);; Molecular Function: calcium ion binding (GO:0005509);; Biological Process: starch metabolic process (GO:0005982);; Cellular Component: chloroplast (GO:0009507);; Molecular Function: glucan 1,4-alpha-maltotetraohydrolase activity (GO:0033910);;	--	Alpha-amylase 3, chloroplastic OS=Arabidopsis thaliana GN=AMY3 PE=2 SV=1	PREDICTED: uncharacterized protein LOC100254959 [Vitis vinifera]
comp10873_c0	1	p2	(CT)10	20	1003	1022	--	--	--	--	--	PREDICTED: uncharacterized protein LOC101754072 [Setaria italica]
comp10879_c0	1	p3	(CAG)7	21	819	839	--	--	Biological Process: cellular metabolic process (GO:0044237);; Biological Process: primary metabolic process (GO:0044238);; Biological Process: organic substance metabolic process (GO:0071704);;	--	Mediator of RNA polymerase II transcription subunit 15a OS=Arabidopsis thaliana GN=MED15A PE=1 SV=1	hypothetical protein PRUPE_ppa000277mg [Prunus persica]
comp1088_c0	1	c	(AG)6---(CT)6	77	8	84	--	--	--	--	14 kDa proline-rich protein DC2.15 OS=Daucus carota PE=2 SV=1	PREDICTED: 14 kDa proline-rich protein DC2.15-like [Fragaria vesca subsp. vesca]
comp10885_c0	1	p3	(GAG)5	15	1301	1315	[R]	General function prediction only	Molecular Function: bile acid:sodium symporter activity (GO:0008508);; Cellular Component: chloroplast envelope (GO:0009941);; Cellular Component: integral component of membrane (GO:0016021);; Biological Process: sodium ion transmembrane transport (GO:0035725);;	K03453|1e-173|osa:4335634|Os04g0381100	Probable sodium/metabolite cotransporter BASS1, chloroplastic OS=Oryza sativa subsp. japonica GN=BASS1 PE=2 SV=2	PREDICTED: uncharacterized sodium-dependent transporter yocS-like [Brachypodium distachyon]
comp10888_c0	1	p3	(GGC)5	15	2208	2222	--	--	Cellular Component: mitochondrion (GO:0005739);;	--	Proline-rich receptor-like protein kinase PERK2 OS=Arabidopsis thaliana GN=PERK2 PE=2 SV=3	PREDICTED: uncharacterized protein LOC100267434 [Vitis vinifera]
comp1089_c0	1	p3	(GCT)5	15	655	669	[K]	Transcription	Biological Process: mRNA splicing, via spliceosome (GO:0000398);; Molecular Function: nucleic acid binding (GO:0003676);; Cellular Component: spliceosomal complex (GO:0005681);; Cellular Component: small nucleolar ribonucleoprotein complex (GO:0005732);; Cellular Component: cytosol (GO:0005829);; Biological Process: protein sumoylation (GO:0016925);;	K11097|7e-51|pop:POPTR_737849|hypothetical protein	Small nuclear ribonucleoprotein E OS=Danio rerio GN=snrpe PE=3 SV=1	small nuclear ribonucleoprotein polypeptide [Jatropha curcas]
comp10892_c0	1	p2	(GA)9	18	1	18	#N/A	#N/A	#N/A	#N/A	#N/A	#N/A
comp109_c2	1	p3	(CAT)7	21	759	779	[J]	Translation, ribosomal structure and biogenesis	--	--	Elongation factor 1-delta 1 OS=Arabidopsis thaliana GN=At1g30230 PE=2 SV=2	hypothetical protein VITISV_015618 [Vitis vinifera]
comp10905_c0	1	c	(CT)6---(CTT)5	77	1	77	--	--	--	--	--	NHL domain-containing protein isoform 3 [Theobroma cacao]
comp10907_c0	1	p3	(TTC)5	15	1	15	--	--	Molecular Function: ATPase activator activity (GO:0001671);; Cellular Component: cytosol (GO:0005829);; Biological Process: protein folding (GO:0006457);; Biological Process: response to heat (GO:0009408);; Biological Process: response to high light intensity (GO:0009644);; Biological Process: positive regulation of ATPase activity (GO:0032781);; Biological Process: response to endoplasmic reticu…	--	Activator of 90 kDa heat shock protein ATPase homolog 2 OS=Bos taurus GN=AHSA2 PE=2 SV=1	hypothetical protein SORBIDRAFT_07g022590 [Sorghum bicolor]
comp10909_c0	1	p2	(CT)10	20	383	402	[O]	Posttranslational modification, protein turnover, chaperones	Cellular Component: mitochondrion (GO:0005739);; Biological Process: protein folding (GO:0006457);; Biological Process: response to stress (GO:0006950);; Cellular Component: plastid (GO:0009536);; Biological Process: proline transport (GO:0015824);; Molecular Function: heat shock protein binding (GO:0031072);;	--	Mitochondrial import inner membrane translocase subunit TIM14-3 OS=Arabidopsis thaliana GN=TIM14-3 PE=3 SV=1	predicted protein [Populus trichocarpa]
comp1091_c0	1	p1	(A)11	11	913	923	#N/A	#N/A	#N/A	#N/A	#N/A	#N/A
comp10912_c0	2	c*	(TG)6(G)11*	22	599	620	--	--	--	--	--	PREDICTED: uncharacterized protein LOC100244776 [Vitis vinifera]
comp10912_c0	1	p2	(TA)7	14	62	75	--	--	--	--	--	PREDICTED: uncharacterized protein LOC100244776 [Vitis vinifera]
comp10913_c0	1	p3	(GAA)5	15	1759	1773	[S]	Function unknown	Cellular Component: mitochondrion (GO:0005739);; Molecular Function: zinc ion binding (GO:0008270);; Biological Process: photosynthesis (GO:0015979);; Biological Process: cellular respiration (GO:0045333);;	--	NADH dehydrogenase [ubiquinone] complex I, assembly factor 7 OS=Dictyostelium discoideum GN=midA PE=1 SV=1	PREDICTED: protein midA, mitochondrial-like [Cucumis sativus]
comp10913_c0	2	p3	(CTT)7	21	1883	1903	[S]	Function unknown	Cellular Component: mitochondrion (GO:0005739);; Molecular Function: zinc ion binding (GO:0008270);; Biological Process: photosynthesis (GO:0015979);; Biological Process: cellular respiration (GO:0045333);;	--	NADH dehydrogenase [ubiquinone] complex I, assembly factor 7 OS=Dictyostelium discoideum GN=midA PE=1 SV=1	PREDICTED: protein midA, mitochondrial-like [Cucumis sativus]
comp10914_c0	1	p1	(A)15	15	2821	2835	--	--	--	--	Pentatricopeptide repeat-containing protein At1g63130, mitochondrial OS=Arabidopsis thaliana GN=At1g63130 PE=2 SV=1	hypothetical protein VITISV_026425 [Vitis vinifera]
comp10917_c0	1	p1	(A)15	15	1	15	--	--	--	--	--	PREDICTED: uncharacterized protein LOC100245130, partial [Vitis vinifera]
comp10919_c0	1	p1	(T)10	10	400	409	#N/A	#N/A	#N/A	#N/A	#N/A	#N/A
comp10928_c0	1	p3	(CTT)6	18	911	928	[OC]	--	Cellular Component: cytoplasm (GO:0005737);; Biological Process: glycerol ether metabolic process (GO:0006662);; Molecular Function: electron carrier activity (GO:0009055);; Molecular Function: protein disulfide oxidoreductase activity (GO:0015035);; Biological Process: electron transport chain (GO:0022900);; Biological Process: cell redox homeostasis (GO:0045454);;	K03671|1e-37|vvi:100250566|hypothetical protein LOC100250566	Thioredoxin H-type 1 OS=Nicotiana tabacum PE=1 SV=1	TRX [Salvia miltiorrhiza]
comp1093_c0	1	c	(GT)10gg(GC)6	34	42	75	--	--	--	--	Protein SPIRAL1-like 3 OS=Oryza sativa subsp. japonica GN=Os12g0502000 PE=2 SV=1	putative nitrilase-associated protein [Sandersonia aurantiaca]
comp10937_c0	1	c	(A)14---(GA)8	79	202	280	--	--	Cellular Component: mitochondrion (GO:0005739);;	--	--	hypothetical protein M569_01559 [Genlisea aurea]
comp10937_c0	3	p2	(CT)6	12	588	599	--	--	Cellular Component: mitochondrion (GO:0005739);;	--	--	hypothetical protein M569_01559 [Genlisea aurea]
comp10937_c0	2	p3	(CTT)5	15	438	452	--	--	Cellular Component: mitochondrion (GO:0005739);;	--	--	hypothetical protein M569_01559 [Genlisea aurea]
comp10938_c0	1	p1	(T)11	11	416	426	[G]	Carbohydrate transport and metabolism	Cellular Component: cytoplasmic membrane-bounded vesicle (GO:0016023);; Molecular Function: hydrolase activity, acting on glycosyl bonds (GO:0016798);;	--	Beta-glucosidase 22 OS=Oryza sativa subsp. japonica GN=BGLU22 PE=2 SV=1	acyl-glucose-dependent anthocyanin 7-O-glucosyltransferase [Agapanthus africanus]
comp1094_c0	1	p2	(AG)9	18	211	228	--	--	Molecular Function: ATP binding (GO:0005524);; Biological Process: response to stress (GO:0006950);;	K03283|5e-15|osa:4332413|Os03g0276500	Heat shock 70 kDa protein 3 OS=Arabidopsis thaliana GN=HSP70-3 PE=1 SV=1	heat shock protein 70 [Nicotiana benthamiana]
comp10940_c0	1	p3	(AGC)5	15	810	824	--	--	--	--	Zinc finger CCCH domain-containing protein 24 OS=Oryza sativa subsp. japonica GN=Os03g0698800 PE=2 SV=1	zinc finger CCCH domain-containing protein 30-like [Vitis vinifera]
comp10941_c0	1	p1	(T)14	14	2276	2289	[O]	Posttranslational modification, protein turnover, chaperones	Molecular Function: metalloendopeptidase activity (GO:0004222);; Cellular Component: mitochondrial inner membrane (GO:0005743);; Biological Process: proteolysis (GO:0006508);; Cellular Component: chloroplast (GO:0009507);; Biological Process: embryo development (GO:0009790);; Biological Process: mRNA modification (GO:0016556);; Biological Process: threonylcarbamoyladenosine biosynthetic process (…	K01409|0.0|vvi:100260957|hypothetical protein LOC100260957	Probable tRNA threonylcarbamoyladenosine biosynthesis protein osgepl1 OS=Xenopus tropicalis GN=osgepl1 PE=2 SV=2	PREDICTED: probable tRNA threonylcarbamoyladenosine biosynthesis protein osgepl1 [Vitis vinifera]
comp10945_c0	1	p2	(CT)9	18	536	553	--	--	Molecular Function: binding (GO:0005488);;	--	Transcription factor DIVARICATA OS=Antirrhinum majus GN=DIVARICATA PE=2 SV=1	PREDICTED: uncharacterized protein LOC100268113 [Vitis vinifera]
comp10946_c0	1	p3	(TGA)5	15	1	15	--	--	Cellular Component: chloroplast (GO:0009507);;	--	Rho GTPase-activating protein 7 OS=Arabidopsis thaliana GN=ROPGAP7 PE=2 SV=1	PREDICTED: uncharacterized protein LOC100246624 [Vitis vinifera]
comp10947_c0	1	p3	(CTC)6	18	135	152	--	--	--	--	--	conserved hypothetical protein [Ricinus communis]
comp1095_c0	1	p3	(GGT)5	15	1195	1209	--	--	--	--	Protein argonaute 18 OS=Oryza sativa subsp. japonica GN=AGO18 PE=2 SV=1	PREDICTED: uncharacterized protein DDB_G0290685-like isoform X1 [Setaria italica]
comp10950_c0	1	p1	(T)21	21	1	21	#N/A	#N/A	#N/A	#N/A	#N/A	#N/A
comp10951_c0	1	p1	(A)16	16	120	135	[RTKL]	--	Molecular Function: protein serine/threonine kinase activity (GO:0004674);; Molecular Function: protein tyrosine kinase activity (GO:0004713);; Molecular Function: ATP binding (GO:0005524);; Cellular Component: plasma membrane (GO:0005886);; Biological Process: protein phosphorylation (GO:0006468);;	--	Receptor-like serine/threonine-protein kinase At3g01300 OS=Arabidopsis thaliana GN=At3g01300 PE=2 SV=1	predicted protein [Hordeum vulgare subsp. vulgare]
comp10953_c0	1	p2	(GA)9	18	496	513	--	--	Cellular Component: cytoplasmic membrane-bounded vesicle (GO:0016023);;	--	Blue copper protein OS=Pisum sativum PE=2 SV=1	predicted protein [Populus trichocarpa]
comp10954_c0	1	p3	(TCT)5	15	3032	3046	--	--	--	--	Neurofilament heavy polypeptide OS=Mus musculus GN=Nefh PE=1 SV=3	PREDICTED: uncharacterized protein LOC100250746 [Vitis vinifera]
comp10955_c0	1	p3	(TCT)6	18	2533	2550	[L]	Replication, recombination and repair	Molecular Function: transferase activity (GO:0016740);; Biological Process: methylation (GO:0032259);;	--	DNA (cytosine-5)-methyltransferase DRM2 OS=Arabidopsis thaliana GN=DRM2 PE=1 SV=1	DRM-type DNA-methyltransferase [Elaeis guineensis]
comp10956_c0	1	p2	(AG)10	20	1	20	[O]	Posttranslational modification, protein turnover, chaperones	Molecular Function: glutathione transferase activity (GO:0004364);; Biological Process: phosphate-containing compound metabolic process (GO:0006796);; Biological Process: response to oxidative stress (GO:0006979);; Biological Process: catabolic process (GO:0009056);; Biological Process: organophosphate metabolic process (GO:0019637);; Biological Process: glucosinolate metabolic process (GO:001976…	K00799|1e-101|pop:POPTR_678517|hypothetical protein	Glutathione S-transferase F11 OS=Arabidopsis thaliana GN=GSTF11 PE=2 SV=1	predicted protein [Populus trichocarpa]
comp10957_c0	1	p1	(A)10	10	133	142	[R]	General function prediction only	Molecular Function: iron ion binding (GO:0005506);; Biological Process: response to red light (GO:0010114);; Cellular Component: cytoplasmic membrane-bounded vesicle (GO:0016023);; Molecular Function: oxidoreductase activity, acting on single donors with incorporation of molecular oxygen, incorporation of two atoms of oxygen (GO:0016702);; Biological Process: secretion by cell (GO:0032940);; Biol…	K04125|3e-77|osa:4325145|Os01g0757200	Gibberellin 2-beta-dioxygenase OS=Phaseolus coccineus GN=GA2OX1 PE=2 SV=1	gibberellin 2-beta-dioxygenase [Ananas comosus]
comp10958_c0	1	p2	(TC)9	18	62	79	--	--	--	--	Leucine-rich repeat extensin-like protein 5 OS=Arabidopsis thaliana GN=LRX5 PE=2 SV=2	Late embryogenesis abundant hydroxyproline-rich glycoprotein family, putative [Theobroma cacao]
comp10959_c0	1	p2	(AG)9	18	883	900	--	--	Molecular Function: binding (GO:0005488);; Biological Process: transcription, DNA-templated (GO:0006351);; Cellular Component: chloroplast (GO:0009507);; Cellular Component: cytoplasmic membrane-bounded vesicle (GO:0016023);;	--	Serine/arginine repetitive matrix protein 3 OS=Homo sapiens GN=SRRM3 PE=2 SV=4	Os07g0548800 [Oryza sativa Japonica Group]
comp10963_c0	1	p2	(AG)7	14	2331	2344	[GOU]	--	Molecular Function: nucleotide-sugar transmembrane transporter activity (GO:0005338);; Cellular Component: plasma membrane (GO:0005886);; Biological Process: GDP-mannose transport (GO:0015784);; Biological Process: transmembrane transport (GO:0055085);;	--	GDP-mannose transporter GONST2 OS=Arabidopsis thaliana GN=GONST2 PE=2 SV=1	Golgi nucleotide sugar transporter 2 isoform 1 [Theobroma cacao]
comp10964_c0	1	p2	(AG)6	12	34	45	#N/A	#N/A	#N/A	#N/A	#N/A	#N/A
comp10964_c0	2	p2	(AG)7	14	191	204	#N/A	#N/A	#N/A	#N/A	#N/A	#N/A
comp10965_c0	1	p2	(AT)6	12	20	31	[R]	General function prediction only	Biological Process: protein targeting to membrane (GO:0006612);; Cellular Component: chloroplast (GO:0009507);; Biological Process: positive regulation of flavonoid biosynthetic process (GO:0009963);; Biological Process: regulation of plant-type hypersensitive response (GO:0010363);; Cellular Component: membrane (GO:0016020);;	--	UPF0721 transmembrane protein YunE OS=Bacillus subtilis (strain 168) GN=yunE PE=3 SV=1	predicted protein [Populus trichocarpa]
comp10968_c0	1	p2	(GA)8	16	1121	1136	--	--	Cellular Component: chloroplast (GO:0009507);;	--	--	PREDICTED: uncharacterized protein LOC100792868 [Glycine max]
comp10969_c0	1	p2	(TA)11	22	1	22	#N/A	#N/A	#N/A	#N/A	#N/A	#N/A
comp10973_c0	1	p2	(AT)6	12	331	342	--	--	--	--	--	hypothetical protein VOLCADRAFT_116582 [Volvox carteri f. nagariensis]
comp10976_c0	1	p3	(CAC)6	18	1150	1167	--	--	--	--	Translation initiation factor IF-2 OS=Frankia sp. (strain EAN1pec) GN=infB PE=3 SV=1	PREDICTED: uncharacterized protein LOC100852917 isoform 2 [Vitis vinifera]
comp10976_c0	2	p5	(GGAAG)5	25	1438	1462	--	--	--	--	Translation initiation factor IF-2 OS=Frankia sp. (strain EAN1pec) GN=infB PE=3 SV=1	PREDICTED: uncharacterized protein LOC100852917 isoform 2 [Vitis vinifera]
comp10982_c0	1	p3	(TAT)5	15	1238	1252	[DZ]	--	Molecular Function: chromatin binding (GO:0003682);; Cellular Component: mitochondrion (GO:0005739);; Molecular Function: Ran GTPase binding (GO:0008536);;	--	Ultraviolet-B receptor UVR8 OS=Arabidopsis thaliana GN=UVR8 PE=1 SV=1	hypothetical protein OsJ_34191 [Oryza sativa Japonica Group]
comp10984_c0	1	p3	(CTG)6	18	133	150	[K]	Transcription	Molecular Function: binding (GO:0005488);; Biological Process: transcription, DNA-templated (GO:0006351);;	--	Transcription factor IIIB 90 kDa subunit OS=Mus musculus GN=Brf1 PE=1 SV=1	unnamed protein product [Vitis vinifera]
comp10986_c0	1	p3	(TGC)5	15	1050	1064	--	--	Molecular Function: DNA binding (GO:0003677);; Molecular Function: sequence-specific DNA binding transcription factor activity (GO:0003700);; Cellular Component: nucleus (GO:0005634);; Biological Process: regulation of transcription, DNA-templated (GO:0006355);;	--	Heat stress transcription factor A-4b OS=Oryza sativa subsp. japonica GN=HSFA4B PE=2 SV=1	PREDICTED: heat stress transcription factor A-4b [Vitis vinifera]
comp10988_c0	1	p2	(GA)7	14	268	281	--	--	Biological Process: cell morphogenesis (GO:0000902);; Cellular Component: nucleus (GO:0005634);; Biological Process: cell growth (GO:0016049);; Biological Process: Golgi vesicle transport (GO:0048193);;	--	--	Os03g0696000 [Oryza sativa Japonica Group]
comp10997_c0	1	p1	(A)16	16	1	16	[GER]	--	Molecular Function: galactose transmembrane transporter activity (GO:0005354);; Biological Process: sister chromatid cohesion (GO:0007062);; Biological Process: galactose transport (GO:0015757);; Cellular Component: integral component of membrane (GO:0016021);; Biological Process: chromatin silencing by small RNA (GO:0031048);; Biological Process: meiotic chromosome segregation (GO:0045132);; Bio…	--	UDP-galactose/UDP-glucose transporter 5B OS=Arabidopsis thaliana GN=At5g59740 PE=2 SV=1	UDP-N-acetylglucosamine transporter family isoform 1 [Theobroma cacao]
comp11_c0	1	c	(GCT)5---(CTT)5	60	385	444	--	--	Cellular Component: plastid (GO:0009536);; Biological Process: cellular biosynthetic process (GO:0044249);;	--	Cylicin-2 OS=Bos taurus GN=CYLC2 PE=1 SV=1	PREDICTED: glutamic acid-rich protein-like isoform X1 [Setaria italica]
comp11000_c0	1	p3	(ATC)5	15	321	335	[D]	Cell cycle control, cell division, chromosome partitioning	Biological Process: cellular process (GO:0009987);; Biological Process: response to stimulus (GO:0050896);;	--	Serine/arginine repetitive matrix protein 2 OS=Homo sapiens GN=SRRM2 PE=1 SV=2	hypothetical protein PRUPE_ppa006697mg [Prunus persica]
comp1101_c0	2	p2	(TC)9	18	1774	1791	--	--	--	--	Transcription factor bHLH93 OS=Arabidopsis thaliana GN=BHLH93 PE=1 SV=1	PREDICTED: transcription factor bHLH93 [Vitis vinifera]
comp1101_c0	3	p2	(TC)6	12	2888	2899	--	--	--	--	Transcription factor bHLH93 OS=Arabidopsis thaliana GN=BHLH93 PE=1 SV=1	PREDICTED: transcription factor bHLH93 [Vitis vinifera]
comp1101_c0	1	p3	(CGG)5	15	1437	1451	--	--	--	--	Transcription factor bHLH93 OS=Arabidopsis thaliana GN=BHLH93 PE=1 SV=1	PREDICTED: transcription factor bHLH93 [Vitis vinifera]
comp11017_c0	1	p2	(TG)6	12	230	241	[R]	General function prediction only	Molecular Function: zinc ion binding (GO:0008270);; Molecular Function: oxidoreductase activity (GO:0016491);; Biological Process: oxidation-reduction process (GO:0055114);;	--	NADP-dependent alkenal double bond reductase P1 OS=Arabidopsis thaliana GN=P1 PE=1 SV=1	PREDICTED: (+)-pulegone reductase [Vitis vinifera]
comp11018_c0	1	p3	(CGG)7	21	1	21	--	--	Biological Process: nucleotide biosynthetic process (GO:0009165);; Molecular Function: protein-arginine N-methyltransferase activity (GO:0016274);; Molecular Function: guanidinoacetate N-methyltransferase activity (GO:0030731);; Biological Process: peptidyl-arginine N-methylation (GO:0035246);;	--	Arginine N-methyltransferase 2 OS=Yarrowia lipolytica (strain CLIB 122 / E 150) GN=RMT2 PE=3 SV=1	ankyrin repeat family protein / methyltransferase-related [Musa acuminata]
comp11026_c0	2	p1	(T)11	11	2545	2555	--	--	Molecular Function: iron ion binding (GO:0005506);; Cellular Component: plastid (GO:0009536);; Molecular Function: oxidoreductase activity, acting on paired donors, with incorporation or reduction of molecular oxygen, 2-oxoglutarate as one donor, and incorporation of one atom each of oxygen into both donors (GO:0016706);; Molecular Function: L-ascorbic acid binding (GO:0031418);; Biological Proce…	--	--	PREDICTED: uncharacterized protein LOC101261647 [Solanum lycopersicum]
comp11026_c0	1	p2	(GA)8	16	1	16	--	--	Molecular Function: iron ion binding (GO:0005506);; Cellular Component: plastid (GO:0009536);; Molecular Function: oxidoreductase activity, acting on paired donors, with incorporation or reduction of molecular oxygen, 2-oxoglutarate as one donor, and incorporation of one atom each of oxygen into both donors (GO:0016706);; Molecular Function: L-ascorbic acid binding (GO:0031418);; Biological Proce…	--	--	PREDICTED: uncharacterized protein LOC101261647 [Solanum lycopersicum]
comp11031_c0	1	p2	(GA)8	16	1897	1912	--	--	--	--	--	hypothetical protein OsJ_03134 [Oryza sativa Japonica Group]
comp11032_c0	1	p2	(CT)7	14	3020	3033	--	--	Cellular Component: mitochondrion (GO:0005739);; Biological Process: leaf senescence (GO:0010150);;	--	--	PREDICTED: uncharacterized protein LOC100244660 [Vitis vinifera]
comp11036_c0	1	c	(GA)10---(GCC)5	129	1	129	--	--	Molecular Function: protein serine/threonine kinase activity (GO:0004674);; Molecular Function: ATP binding (GO:0005524);; Biological Process: protein phosphorylation (GO:0006468);; Biological Process: transmembrane receptor protein tyrosine kinase signaling pathway (GO:0007169);; Biological Process: regulation of meristem growth (GO:0010075);; Cellular Component: integral component of membrane (…	--	Leucine-rich repeat receptor protein kinase EXS OS=Arabidopsis thaliana GN=EXS PE=1 SV=1	PREDICTED: somatic embryogenesis receptor kinase 4-like [Glycine max]
comp11039_c0	1	p1	(A)10	10	1570	1579	[I]	Lipid transport and metabolism	Molecular Function: enoyl-CoA hydratase activity (GO:0004300);; Cellular Component: mitochondrion (GO:0005739);; Biological Process: fatty acid metabolic process (GO:0006631);;	K05607|1e-126|vvi:100247500|hypothetical protein LOC100247500	Methylglutaconyl-CoA hydratase, mitochondrial OS=Dictyostelium discoideum GN=auh PE=3 SV=1	PREDICTED: methylglutaconyl-CoA hydratase, mitochondrial-like [Cucumis sativus]
comp11042_c0	1	p2	(GA)9	18	1737	1754	--	--	--	--	WD repeat-containing protein 74 OS=Bos taurus GN=WDR74 PE=2 SV=1	PREDICTED: uncharacterized protein LOC101303117 [Fragaria vesca subsp. vesca]
comp11049_c0	1	p3	(GCT)5	15	496	510	#N/A	#N/A	#N/A	#N/A	#N/A	#N/A
comp1105_c0	1	p3	(CCG)6	18	111	128	--	--	Cellular Component: plasmodesma (GO:0009506);; Cellular Component: integral component of cytoplasmic side of endoplasmic reticulum membrane (GO:0071458);; Cellular Component: endoplasmic reticulum tubular network (GO:0071782);; Biological Process: endoplasmic reticulum tubular network organization (GO:0071786);;	--	Reticulon-like protein B3 OS=Arabidopsis thaliana GN=RTNLB3 PE=1 SV=1	Reticulon-like protein B1 [Aegilops tauschii]
comp1106_c0	1	p3	(GCT)6	18	1617	1634	[RTKL]	--	Molecular Function: sequence-specific DNA binding transcription factor activity (GO:0003700);; Molecular Function: protein tyrosine kinase activity (GO:0004713);; Molecular Function: ATP binding (GO:0005524);; Cellular Component: cytosol (GO:0005829);; Cellular Component: plasma membrane (GO:0005886);; Biological Process: protein phosphorylation (GO:0006468);; Molecular Function: RNA polymerase I…	K03097|0.0|vvi:100262741|hypothetical protein LOC100262741	Casein kinase II subunit alpha, chloroplastic OS=Arabidopsis thaliana GN=At2g23070 PE=2 SV=1	PREDICTED: casein kinase II subunit alpha isoform 1 [Vitis vinifera]
comp11061_c0	1	p3	(TCT)6	18	1	18	--	--	--	--	Probable histone H2A variant 2 OS=Oryza sativa subsp. japonica GN=Os10g0418000 PE=2 SV=1	--
comp11066_c0	2	p1	(T)11	11	2530	2540	[J]	Translation, ribosomal structure and biogenesis	Molecular Function: electron carrier activity (GO:0009055);; Molecular Function: protein disulfide oxidoreductase activity (GO:0015035);; Biological Process: intracellular signal transduction (GO:0035556);; Biological Process: cell redox homeostasis (GO:0045454);; Biological Process: anther development (GO:0048653);;	--	Putative AC transposase OS=Zea mays PE=2 SV=2	PREDICTED: uncharacterized protein LOC100263256 [Vitis vinifera]
comp11066_c0	1	p3	(ACT)5	15	151	165	[J]	Translation, ribosomal structure and biogenesis	Molecular Function: electron carrier activity (GO:0009055);; Molecular Function: protein disulfide oxidoreductase activity (GO:0015035);; Biological Process: intracellular signal transduction (GO:0035556);; Biological Process: cell redox homeostasis (GO:0045454);; Biological Process: anther development (GO:0048653);;	--	Putative AC transposase OS=Zea mays PE=2 SV=2	PREDICTED: uncharacterized protein LOC100263256 [Vitis vinifera]
comp11066_c1	1	p2	(GA)8	16	30	45	--	--	--	--	Uncharacterized protein DKFZp434B061 OS=Homo sapiens PE=2 SV=2	PREDICTED: uncharacterized protein LOC100244711 [Vitis vinifera]
comp11066_c1	2	p2	(CT)6	12	881	892	--	--	--	--	Uncharacterized protein DKFZp434B061 OS=Homo sapiens PE=2 SV=2	PREDICTED: uncharacterized protein LOC100244711 [Vitis vinifera]
comp11067_c0	1	p1	(A)15	15	576	590	#N/A	#N/A	#N/A	#N/A	#N/A	#N/A
comp11071_c0	1	p1	(A)21	21	1	21	#N/A	#N/A	#N/A	#N/A	#N/A	#N/A
comp11071_c0	2	p1	(T)15	15	296	310	#N/A	#N/A	#N/A	#N/A	#N/A	#N/A
comp11076_c0	1	p1	(T)12	12	109	120	--	--	Biological Process: protein targeting to membrane (GO:0006612);; Biological Process: response to water deprivation (GO:0009414);; Biological Process: response to wounding (GO:0009611);; Biological Process: response to fungus (GO:0009620);; Biological Process: jasmonic acid biosynthetic process (GO:0009695);; Biological Process: salicylic acid mediated signaling pathway (GO:0009863);; Biological P…	--	Transmembrane protein 53 OS=Danio rerio GN=tmem53 PE=2 SV=1	PREDICTED: transmembrane protein 53 [Vitis vinifera]
comp11077_c0	1	p3	(GAA)6	18	866	883	--	--	Biological Process: pentose-phosphate shunt (GO:0006098);; Biological Process: phosphatidylglycerol biosynthetic process (GO:0006655);; Cellular Component: chloroplast stroma (GO:0009570);; Biological Process: isopentenyl diphosphate biosynthetic process, methylerythritol 4-phosphate pathway (GO:0019288);; Biological Process: response to karrikin (GO:0080167);; Biological Process: granum assembly…	--	Protein LHCP TRANSLOCATION DEFECT OS=Arabidopsis thaliana GN=LTD PE=1 SV=1	uncharacterized protein LOC100500557 [Glycine max]
comp11078_c0	2	p1	(T)19	19	1233	1251	#N/A	#N/A	#N/A	#N/A	#N/A	#N/A
comp11078_c0	1	p2	(CA)10	20	1	20	#N/A	#N/A	#N/A	#N/A	#N/A	#N/A
comp11080_c0	1	p1	(A)17	17	1	17	--	--	Cellular Component: cell part (GO:0044464);;	--	--	Uncharacterized protein TCM_034234 [Theobroma cacao]
comp11088_c0	1	p5	(CAAAC)5	25	124	148	--	--	--	--	--	PREDICTED: uncharacterized protein LOC100267948 [Vitis vinifera]
comp11089_c0	1	p3	(GCG)5	15	2003	2017	--	--	Molecular Function: structural molecule activity (GO:0005198);; Biological Process: pentose-phosphate shunt (GO:0006098);; Cellular Component: chloroplast thylakoid membrane (GO:0009535);; Cellular Component: chloroplast envelope (GO:0009941);; Biological Process: thylakoid membrane organization (GO:0010027);;	--	Probable plastid-lipid-associated protein 12, chloroplastic OS=Arabidopsis thaliana GN=PAP12 PE=2 SV=1	PREDICTED: probable plastid-lipid-associated protein 12, chloroplastic [Vitis vinifera]
comp1109_c1	1	p2	(CT)6	12	253	264	--	--	--	--	--	hypothetical protein SORBIDRAFT_04g036195 [Sorghum bicolor]
comp11090_c0	2	c	(AGC)5at(AAG)7	38	415	452	[O]	Posttranslational modification, protein turnover, chaperones	Biological Process: mitotic G2 phase (GO:0000085);; Biological Process: protein peptidyl-prolyl isomerization (GO:0000413);; Molecular Function: chromatin binding (GO:0003682);; Molecular Function: peptidyl-prolyl cis-trans isomerase activity (GO:0003755);; Cellular Component: nucleus (GO:0005634);; Biological Process: DNA methylation (GO:0006306);; Biological Process: mitotic recombination (GO:0…	K12736|0.0|rcu:RCOM_0792840|WD-repeat protein, putative (EC:5.2.1.8)	Peptidylprolyl isomerase domain and WD repeat-containing protein 1 OS=Mus musculus GN=Ppwd1 PE=2 SV=2	Peptidylprolyl isomerase domain and WD repeat-containing protein 1 isoform 1 [Theobroma cacao]
comp11090_c0	1	p2	(AG)7	14	42	55	[O]	Posttranslational modification, protein turnover, chaperones	Biological Process: mitotic G2 phase (GO:0000085);; Biological Process: protein peptidyl-prolyl isomerization (GO:0000413);; Molecular Function: chromatin binding (GO:0003682);; Molecular Function: peptidyl-prolyl cis-trans isomerase activity (GO:0003755);; Cellular Component: nucleus (GO:0005634);; Biological Process: DNA methylation (GO:0006306);; Biological Process: mitotic recombination (GO:0…	K12736|0.0|rcu:RCOM_0792840|WD-repeat protein, putative (EC:5.2.1.8)	Peptidylprolyl isomerase domain and WD repeat-containing protein 1 OS=Mus musculus GN=Ppwd1 PE=2 SV=2	Peptidylprolyl isomerase domain and WD repeat-containing protein 1 isoform 1 [Theobroma cacao]
comp11096_c0	1	p2	(GA)7	14	1	14	--	--	--	--	Squamosa promoter-binding-like protein 18 OS=Oryza sativa subsp. japonica GN=SPL18 PE=2 SV=1	SQUAMOSA promoter-binding-like 7 [Erycina pusilla]
comp11100_c0	2	p1	(T)10	10	1655	1664	--	--	--	--	Probable transcription factor GLK2 OS=Oryza sativa subsp. japonica GN=GLK2 PE=2 SV=1	predicted protein [Populus trichocarpa]
comp11100_c0	1	p2	(CT)8	16	1	16	--	--	--	--	Probable transcription factor GLK2 OS=Oryza sativa subsp. japonica GN=GLK2 PE=2 SV=1	predicted protein [Populus trichocarpa]
comp1111_c0	1	c	(CGG)8---(AG)6	86	619	704	--	--	--	--	Protein SPIRAL1-like 2 OS=Arabidopsis thaliana GN=SP1L2 PE=2 SV=1	unnamed protein product [Vitis vinifera]
comp11115_c0	1	p1	(A)10	10	1219	1228	#N/A	#N/A	#N/A	#N/A	#N/A	#N/A
comp11119_c0	1	p2	(GA)8	16	1	16	[J]	Translation, ribosomal structure and biogenesis	Molecular Function: nucleic acid binding (GO:0003676);; Biological Process: gene silencing (GO:0016458);; Biological Process: response to stimulus (GO:0050896);;	--	Protein argonaute 1A OS=Oryza sativa subsp. japonica GN=AGO1A PE=2 SV=1	argonaute protein group [Populus trichocarpa]
comp11125_c0	1	p1	(A)10	10	112	121	--	--	Cellular Component: mitochondrion (GO:0005739);; Biological Process: phosphatidylinositol biosynthetic process (GO:0006661);; Cellular Component: membrane (GO:0016020);; Cellular Component: cytoplasmic membrane-bounded vesicle (GO:0016023);;	--	Protein RTE1-HOMOLOG OS=Arabidopsis thaliana GN=RTH PE=2 SV=1	PREDICTED: transmembrane protein 222-like [Vitis vinifera]
comp11127_c0	1	p1	(A)12	12	1711	1722	--	--	Cellular Component: mitochondrion (GO:0005739);; Biological Process: RNA splicing (GO:0008380);; Cellular Component: plastid (GO:0009536);; Biological Process: embryo development (GO:0009790);; Biological Process: rRNA transcription from plastid promoter (GO:0042794);;	--	Putative protein TPRXL OS=Homo sapiens GN=TPRXL PE=5 SV=2	PREDICTED: uncharacterized protein LOC101300585 [Fragaria vesca subsp. vesca]
comp1113_c0	1	p2	(TC)8	16	1	16	[O]	Posttranslational modification, protein turnover, chaperones	Molecular Function: ATP binding (GO:0005524);; Biological Process: ATP catabolic process (GO:0006200);; Biological Process: proteolysis (GO:0006508);; Molecular Function: peptidase activity (GO:0008233);; Cellular Component: chloroplast stroma (GO:0009570);; Biological Process: response to absence of light (GO:0009646);; Cellular Component: chloroplast envelope (GO:0009941);; Molecular Function: …	--	Chaperone protein ClpD2, chloroplastic OS=Oryza sativa subsp. japonica GN=CLPD2 PE=2 SV=2	Clp ATPase isoform 1 [Theobroma cacao]
comp1113_c0	2	p3	(AGA)5	15	148	162	[O]	Posttranslational modification, protein turnover, chaperones	Molecular Function: ATP binding (GO:0005524);; Biological Process: ATP catabolic process (GO:0006200);; Biological Process: proteolysis (GO:0006508);; Molecular Function: peptidase activity (GO:0008233);; Cellular Component: chloroplast stroma (GO:0009570);; Biological Process: response to absence of light (GO:0009646);; Cellular Component: chloroplast envelope (GO:0009941);; Molecular Function: …	--	Chaperone protein ClpD2, chloroplastic OS=Oryza sativa subsp. japonica GN=CLPD2 PE=2 SV=2	Clp ATPase isoform 1 [Theobroma cacao]
comp11130_c0	1	p3	(TCT)7	21	2	22	--	--	--	--	--	PREDICTED: uncharacterized protein LOC100779669 [Glycine max]
comp11131_c0	1	p2	(AT)11	22	2	23	--	--	--	--	--	predicted protein [Populus trichocarpa]
comp11132_c0	1	p3	(CTC)5	15	10	24	--	--	Cellular Component: cell part (GO:0044464);;	--	Formin-like protein 5 OS=Oryza sativa subsp. japonica GN=FH5 PE=2 SV=2	PREDICTED: uncharacterized protein LOC100255130 [Vitis vinifera]
comp11134_c0	1	p3	(CTC)5	15	243	257	[RTKL]	--	Molecular Function: protein serine/threonine kinase activity (GO:0004674);; Molecular Function: ATP binding (GO:0005524);; Biological Process: protein phosphorylation (GO:0006468);;	--	Probable receptor-like serine/threonine-protein kinase At5g57670 OS=Arabidopsis thaliana GN=At5g57670 PE=2 SV=1	PREDICTED: probable receptor-like serine/threonine-protein kinase At5g57670 [Vitis vinifera]
comp11136_c0	1	p2	(GA)7	14	1341	1354	[Q]	Secondary metabolites biosynthesis, transport and catabolism	Molecular Function: lipid transporter activity (GO:0005319);; Biological Process: lipid transport (GO:0006869);; Cellular Component: chloroplast inner membrane (GO:0009706);; Cellular Component: chloroplast outer membrane (GO:0009707);; Biological Process: methylglyoxal catabolic process to D-lactate (GO:0019243);;	--	Protein TRIGALACTOSYLDIACYLGLYCEROL 1, chloroplastic OS=Arabidopsis thaliana GN=TGD1 PE=1 SV=1	Inner membrane protein yrbE, putative [Ricinus communis]
comp1114_c0	1	p2	(TC)11	22	1	22	--	--	Molecular Function: structural constituent of ribosome (GO:0003735);; Cellular Component: ribosome (GO:0005840);; Cellular Component: chloroplast stroma (GO:0009570);; Cellular Component: chloroplast envelope (GO:0009941);; Biological Process: plastid translation (GO:0032544);;	--	30S ribosomal protein S31, chloroplastic OS=Arabidopsis thaliana GN=RPS31 PE=1 SV=1	Plastid-specific ribosomal protein 4 [Theobroma cacao]
comp11147_c0	1	p2	(TC)9	18	1	18	--	--	Cellular Component: membrane (GO:0016020);;	--	Probable cyclic nucleotide-gated ion channel 20, chloroplastic OS=Arabidopsis thaliana GN=CNGC20 PE=2 SV=1	Cyclic nucleotide-binding transporter 1 isoform 10 [Theobroma cacao]
comp1116_c0	1	p3	(GGA)5	15	839	853	--	--	Biological Process: RNA splicing, via endonucleolytic cleavage and ligation (GO:0000394);; Molecular Function: calmodulin binding (GO:0005516);; Cellular Component: endoplasmic reticulum (GO:0005783);; Biological Process: N-glycan processing (GO:0006491);; Biological Process: methionine biosynthetic process (GO:0009086);; Cellular Component: chloroplast (GO:0009507);; Cellular Component: cytoplas…	K08288|1e-110|zma:100279808|pco088319	Glucosidase 2 subunit beta OS=Homo sapiens GN=PRKCSH PE=1 SV=2	predicted protein [Hordeum vulgare subsp. vulgare]
comp11166_c0	1	p1	(A)15	15	1	15	#N/A	#N/A	#N/A	#N/A	#N/A	#N/A
comp1117_c0	1	p2	(GA)9	18	1	18	--	--	--	--	Bowman-Birk type proteinase inhibitor 1 OS=Dioclea glabra PE=1 SV=1	hypothetical protein MTR_7g077240 [Medicago truncatula]
comp11172_c0	1	p1	(T)10	10	445	454	--	--	--	--	--	conserved hypothetical protein [Ricinus communis]
comp11172_c0	2	p2	(GA)7	14	2310	2323	--	--	--	--	--	conserved hypothetical protein [Ricinus communis]
comp11177_c0	2	p1	(G)10	10	916	925	#N/A	#N/A	#N/A	#N/A	#N/A	#N/A
comp11177_c0	1	p2	(AG)6	12	48	59	#N/A	#N/A	#N/A	#N/A	#N/A	#N/A
comp11178_c0	1	p1	(T)10	10	107	116	--	--	Molecular Function: hydrolase activity (GO:0016787);;	--	--	hydrolase [Lophopyrum elongatum]
comp11179_c0	1	p1	(A)12	12	83	94	--	--	Cellular Component: plastid (GO:0009536);; Biological Process: tetrapyrrole metabolic process (GO:0033013);; Biological Process: cellular nitrogen compound metabolic process (GO:0034641);; Biological Process: cellular biosynthetic process (GO:0044249);; Biological Process: cofactor metabolic process (GO:0051186);; Biological Process: oxidation-reduction process (GO:0055114);; Biological Process: …	--	Probable inactive heme oxygenase 2, chloroplastic OS=Oryza sativa subsp. japonica GN=HO2 PE=2 SV=1	hypothetical protein PRUPE_ppa009873mg [Prunus persica]
comp11179_c0	2	p3	(GGA)6	18	1219	1236	--	--	Cellular Component: plastid (GO:0009536);; Biological Process: tetrapyrrole metabolic process (GO:0033013);; Biological Process: cellular nitrogen compound metabolic process (GO:0034641);; Biological Process: cellular biosynthetic process (GO:0044249);; Biological Process: cofactor metabolic process (GO:0051186);; Biological Process: oxidation-reduction process (GO:0055114);; Biological Process: …	--	Probable inactive heme oxygenase 2, chloroplastic OS=Oryza sativa subsp. japonica GN=HO2 PE=2 SV=1	hypothetical protein PRUPE_ppa009873mg [Prunus persica]
comp1118_c0	1	p2	(CT)8	16	2441	2456	--	--	Cellular Component: Golgi apparatus (GO:0005794);; Cellular Component: plasma membrane (GO:0005886);; Cellular Component: plant-type cell wall (GO:0009505);; Cellular Component: integral component of membrane (GO:0016021);; Cellular Component: cytoplasmic membrane-bounded vesicle (GO:0016023);;	--	Transmembrane 9 superfamily member 4 OS=Pongo abelii GN=TM9SF4 PE=2 SV=1	Endomembrane protein 70 protein family [Theobroma cacao]
comp11180_c0	1	p2	(AG)8	16	347	362	--	--	--	--	Sulfated surface glycoprotein 185 OS=Volvox carteri PE=1 SV=1	actin binding protein, putative [Ricinus communis]
comp11188_c0	1	p2	(AG)9	18	1	18	--	--	Biological Process: proteolysis (GO:0006508);; Molecular Function: cysteine-type peptidase activity (GO:0008234);; Biological Process: cellular metabolic process (GO:0044237);;	K11855|2e-49|sbi:SORBI_10g005680|hypothetical protein	Ubiquitin carboxyl-terminal hydrolase 23 OS=Arabidopsis thaliana GN=UBP23 PE=2 SV=2	unnamed protein product [Vitis vinifera]
comp11189_c0	2	p2	(TA)6	12	969	980	--	--	Biological Process: defense response (GO:0006952);; Biological Process: regulation of cellular process (GO:0050794);; Biological Process: response to other organism (GO:0051707);; Biological Process: cellular response to stimulus (GO:0051716);;	K13459|3e-28|vvi:100254298|hypothetical protein LOC100254298	Probable disease resistance protein At1g12290 OS=Arabidopsis thaliana GN=At1g12290 PE=2 SV=1	unnamed protein product [Vitis vinifera]
comp11189_c0	1	p3	(GAT)5	15	9	23	--	--	Biological Process: defense response (GO:0006952);; Biological Process: regulation of cellular process (GO:0050794);; Biological Process: response to other organism (GO:0051707);; Biological Process: cellular response to stimulus (GO:0051716);;	K13459|3e-28|vvi:100254298|hypothetical protein LOC100254298	Probable disease resistance protein At1g12290 OS=Arabidopsis thaliana GN=At1g12290 PE=2 SV=1	unnamed protein product [Vitis vinifera]
comp11190_c0	1	c	(GA)9---(AG)8	43	1	43	--	--	--	--	Squamosa promoter-binding-like protein 3 OS=Oryza sativa subsp. japonica GN=SPL3 PE=2 SV=1	PREDICTED: squamosa promoter-binding-like protein 12-like [Vitis vinifera]
comp11191_c0	1	p2	(AG)10	20	1433	1452	--	--	--	--	Basic proline-rich protein OS=Sus scrofa PE=1 SV=2	LOC100281684 [Zea mays]
comp11192_c0	1	p3	(ACC)6	18	3560	3577	--	--	--	--	Calmodulin-binding transcription activator 2 OS=Arabidopsis thaliana GN=CMTA2 PE=1 SV=1	PREDICTED: calmodulin-binding transcription activator 1 [Vitis vinifera]
comp11193_c0	1	p2	(GA)7	14	2200	2213	[RTKL]	--	Molecular Function: protein serine/threonine kinase activity (GO:0004674);; Molecular Function: protein tyrosine kinase activity (GO:0004713);; Molecular Function: ATP binding (GO:0005524);; Cellular Component: plasma membrane (GO:0005886);; Biological Process: protein phosphorylation (GO:0006468);; Biological Process: transmembrane receptor protein tyrosine kinase signaling pathway (GO:0007169);…	--	Probable inactive receptor kinase At5g58300 OS=Arabidopsis thaliana GN=At5g58300 PE=1 SV=1	unnamed protein product [Vitis vinifera]
comp11197_c0	1	p3	(TCC)5	15	1068	1082	--	--	--	--	Protein synthesis inhibitor II OS=Hordeum vulgare GN=RIP30A PE=1 SV=1	Ribosome-inactivating protein [Beauveria bassiana ARSEF 2860]
comp11206_c0	1	p2	(TA)10	20	1	20	--	--	--	--	Acrosin OS=Oryctolagus cuniculus GN=ACR PE=2 SV=1	hypothetical protein DACRYDRAFT_103430 [Dacryopinax sp. DJM-731 SS1]
comp1121_c0	1	p1	(A)10	10	114	123	[IQ]	--	Biological Process: fatty acid biosynthetic process (GO:0006633);; Cellular Component: chloroplast (GO:0009507);;	--	Acyl carrier protein 1, chloroplastic OS=Casuarina glauca GN=ACP1 PE=2 SV=1	Acyl carrier protein 3, chloroplastic, putative [Theobroma cacao]
comp11210_c0	1	p2	(TC)6	12	219	230	--	--	Molecular Function: binding (GO:0005488);; Cellular Component: membrane (GO:0016020);;	--	Extensin OS=Sorghum bicolor GN=HRGP PE=3 SV=1	PREDICTED: uncharacterized protein LOC101253557 [Solanum lycopersicum]
comp11221_c0	1	p2	(CT)10	20	1	20	--	--	Molecular Function: carbon-sulfur lyase activity (GO:0016846);;	--	Tryptophan aminotransferase-related protein 3 OS=Arabidopsis thaliana GN=TAR3 PE=3 SV=1	PREDICTED: tryptophan aminotransferase-related protein 4 [Vitis vinifera]
comp11225_c0	1	p2	(GA)9	18	1	18	--	--	Molecular Function: sesquiterpene synthase activity (GO:0010334);; Biological Process: geranyl diphosphate metabolic process (GO:0033383);;	--	Alpha-humulene synthase OS=Zingiber zerumbet GN=ZSS1 PE=1 SV=1	sesquiterpene synthase [Elaeis oleifera]
comp11230_c0	1	p2	(TC)9	18	139	156	--	--	Molecular Function: sequence-specific DNA binding transcription factor activity (GO:0003700);; Cellular Component: nucleus (GO:0005634);; Biological Process: regulation of transcription, DNA-templated (GO:0006355);; Biological Process: response to mechanical stimulus (GO:0009612);; Biological Process: calcium-mediated signaling (GO:0019722);; Molecular Function: sequence-specific DNA binding (GO:…	K14431|0.0|pop:POPTR_1085955|hypothetical protein	Transcription factor TGA2 OS=Arabidopsis thaliana GN=TGA2 PE=1 SV=1	bZIP protein [Nelumbo nucifera]
comp11233_c0	1	p2	(TC)7	14	743	756	--	--	--	--	Mucin-2 OS=Homo sapiens GN=MUC2 PE=1 SV=2	PREDICTED: uncharacterized protein LOC100249528 [Vitis vinifera]
comp11238_c0	1	p2	(CT)9	18	1	18	#N/A	#N/A	#N/A	#N/A	#N/A	#N/A
comp11239_c0	1	p2	(TC)10	20	2	21	--	--	Cellular Component: mitochondrion (GO:0005739);;	--	--	unknown [Zea mays]
comp11243_c0	1	c	(TC)6---(CT)6	33	11	43	[O]	Posttranslational modification, protein turnover, chaperones	Molecular Function: ATP binding (GO:0005524);; Molecular Function: microtubule-severing ATPase activity (GO:0008568);;	--	ATPase family AAA domain-containing protein At1g05910 OS=Arabidopsis thaliana GN=At1g05910 PE=2 SV=1	PREDICTED: ATPase family AAA domain-containing protein 2B-like [Vitis vinifera]
comp11248_c0	1	p2	(CT)8	16	3170	3185	--	--	Biological Process: signal transduction (GO:0007165);; Biological Process: biosynthetic process (GO:0009058);; Biological Process: response to salicylic acid (GO:0009751);; Biological Process: posttranscriptional gene silencing (GO:0016441);; Molecular Function: nucleotidyltransferase activity (GO:0016779);; Biological Process: regulation of cellular metabolic process (GO:0031323);; Biological Pr…	--	RNA-dependent RNA polymerase 1 OS=Arabidopsis thaliana GN=RDR1 PE=2 SV=1	PREDICTED: RNA-dependent RNA polymerase 1 [Vitis vinifera]
comp1125_c0	1	p3	(ATA)5	15	351	365	--	--	Cellular Component: cytoplasmic membrane-bounded vesicle (GO:0016023);;	--	Mavicyanin OS=Cucurbita pepo PE=1 SV=1	predicted protein [Hordeum vulgare subsp. vulgare]
comp1125_c0	2	p3	(GCA)5	15	1070	1084	--	--	Cellular Component: cytoplasmic membrane-bounded vesicle (GO:0016023);;	--	Mavicyanin OS=Cucurbita pepo PE=1 SV=1	predicted protein [Hordeum vulgare subsp. vulgare]
comp11251_c0	1	p3	(CAG)5	15	224	238	--	--	Biological Process: single-organism cellular process (GO:0044763);;	--	Formin-like protein 20 OS=Arabidopsis thaliana GN=FH20 PE=2 SV=3	predicted protein [Physcomitrella patens subsp. patens]
comp11257_c0	1	p1	(A)10	10	85	94	--	--	--	K14169|3e-31|osa:4352669|Os12g0588900	Cytoplasmic tRNA 2-thiolation protein 2 OS=Oryza sativa subsp. indica GN=CTU2 PE=2 SV=1	RecName: Full=Cytoplasmic tRNA 2-thiolation protein 2
comp11259_c0	1	p1	(T)12	12	404	415	[R]	General function prediction only	Molecular Function: GTPase activity (GO:0003924);; Molecular Function: GTP binding (GO:0005525);; Cellular Component: early endosome (GO:0005769);; Biological Process: GTP catabolic process (GO:0006184);; Biological Process: protein targeting to vacuole (GO:0006623);; Biological Process: small GTPase mediated signal transduction (GO:0007264);; Cellular Component: cytoplasmic side of endosome memb…	--	Ras-related protein RABF1 OS=Arabidopsis thaliana GN=RABF1 PE=1 SV=1	PREDICTED: ras-related protein RABF1 [Vitis vinifera]
comp1126_c0	1	p3	(CGC)5	15	96	110	--	--	Cellular Component: intracellular (GO:0005622);; Molecular Function: zinc ion binding (GO:0008270);;	--	RanBP2-type zinc finger protein At1g67325 OS=Arabidopsis thaliana GN=At1g67325 PE=1 SV=1	hypothetical protein PRUPE_ppa009603mg [Prunus persica]
comp11263_c0	1	p3	(GCC)5	15	149	163	[R]	General function prediction only	Biological Process: microtubule cytoskeleton organization (GO:0000226);; Biological Process: cytokinesis by cell plate formation (GO:0000911);; Molecular Function: ARF guanyl-nucleotide exchange factor activity (GO:0005086);; Cellular Component: nucleus (GO:0005634);; Cellular Component: chloroplast (GO:0009507);; Biological Process: gravitropism (GO:0009630);; Biological Process: vesicle-mediate…	--	Brefeldin A-inhibited guanine nucleotide-exchange protein 1 OS=Arabidopsis thaliana GN=BIG1 PE=2 SV=1	PREDICTED: brefeldin A-inhibited guanine nucleotide-exchange protein 2-like [Vitis vinifera]
comp11268_c0	1	p1	(T)21	21	1	21	#N/A	#N/A	#N/A	#N/A	#N/A	#N/A
comp11269_c0	1	p1	(A)10	10	112	121	--	--	--	--	Transcription factor TCP8 OS=Arabidopsis thaliana GN=TCP8 PE=2 SV=1	TCP domain class transcription factor [Malus domestica]
comp11272_c0	1	p2	(TC)6	12	1124	1135	--	--	Cellular Component: mitochondrion (GO:0005739);;	--	Auxilin-related protein 1 OS=Arabidopsis thaliana GN=At4g12780 PE=1 SV=2	unnamed protein product [Vitis vinifera]
comp11277_c0	1	p1	(A)12	12	1	12	--	--	Biological Process: protein peptidyl-prolyl isomerization (GO:0000413);; Molecular Function: peptidyl-prolyl cis-trans isomerase activity (GO:0003755);; Molecular Function: FK506 binding (GO:0005528);; Cellular Component: nucleus (GO:0005634);; Biological Process: mitotic recombination (GO:0006312);; Biological Process: protein folding (GO:0006457);; Cellular Component: chloroplast thylakoid lume…	--	Peptidyl-prolyl cis-trans isomerase FKBP43 OS=Arabidopsis thaliana GN=FKBP43 PE=2 SV=1	hypothetical protein PRUPE_ppa024757mg [Prunus persica]
comp11277_c0	2	p3	(TCA)5	15	1278	1292	--	--	Biological Process: protein peptidyl-prolyl isomerization (GO:0000413);; Molecular Function: peptidyl-prolyl cis-trans isomerase activity (GO:0003755);; Molecular Function: FK506 binding (GO:0005528);; Cellular Component: nucleus (GO:0005634);; Biological Process: mitotic recombination (GO:0006312);; Biological Process: protein folding (GO:0006457);; Cellular Component: chloroplast thylakoid lume…	--	Peptidyl-prolyl cis-trans isomerase FKBP43 OS=Arabidopsis thaliana GN=FKBP43 PE=2 SV=1	hypothetical protein PRUPE_ppa024757mg [Prunus persica]
comp11279_c0	1	p2	(TC)6	12	79	90	[D]	Cell cycle control, cell division, chromosome partitioning	Cellular Component: intracellular membrane-bounded organelle (GO:0043231);; Cellular Component: cytoplasmic part (GO:0044444);;	--	Basic proline-rich protein OS=Sus scrofa PE=1 SV=2	PREDICTED: uncharacterized protein LOC100247984 isoform 2 [Vitis vinifera]
comp1128_c0	1	p1	(A)11	11	63	73	[O]	Posttranslational modification, protein turnover, chaperones	Molecular Function: ATP binding (GO:0005524);; Cellular Component: nucleus (GO:0005634);; Cellular Component: cytosol (GO:0005829);; Cellular Component: plasma membrane (GO:0005886);; Biological Process: ATP catabolic process (GO:0006200);; Biological Process: ubiquitin-dependent protein catabolic process (GO:0006511);; Molecular Function: peptidase activity (GO:0008233);; Cellular Component: pro…	K03061|0.0|rcu:RCOM_0708270|26S protease regulatory subunit, putative (EC:3.6.4.3)	26S protease regulatory subunit 7 homolog A OS=Arabidopsis thaliana GN=RPT1A PE=1 SV=1	PREDICTED: 26S protease regulatory subunit 7 homolog A-like [Solanum lycopersicum]
comp1128_c0	2	p2	(CT)8	16	1889	1904	[O]	Posttranslational modification, protein turnover, chaperones	Molecular Function: ATP binding (GO:0005524);; Cellular Component: nucleus (GO:0005634);; Cellular Component: cytosol (GO:0005829);; Cellular Component: plasma membrane (GO:0005886);; Biological Process: ATP catabolic process (GO:0006200);; Biological Process: ubiquitin-dependent protein catabolic process (GO:0006511);; Molecular Function: peptidase activity (GO:0008233);; Cellular Component: pro…	K03061|0.0|rcu:RCOM_0708270|26S protease regulatory subunit, putative (EC:3.6.4.3)	26S protease regulatory subunit 7 homolog A OS=Arabidopsis thaliana GN=RPT1A PE=1 SV=1	PREDICTED: 26S protease regulatory subunit 7 homolog A-like [Solanum lycopersicum]
comp11291_c0	1	p1	(A)10	10	285	294	[O]	Posttranslational modification, protein turnover, chaperones	Molecular Function: threonine-type endopeptidase activity (GO:0004298);; Cellular Component: nucleus (GO:0005634);; Cellular Component: plasma membrane (GO:0005886);; Biological Process: ubiquitin-dependent protein catabolic process (GO:0006511);; Cellular Component: proteasome core complex, alpha-subunit complex (GO:0019773);; Cellular Component: cytosolic ribosome (GO:0022626);; Biological Proc…	K02729|1e-33|vvi:100263432|hypothetical protein	Proteasome subunit alpha type-5 OS=Glycine max GN=PAE1 PE=1 SV=1	putative alpha5 proteasome subunit [Nicotiana tabacum]
comp11296_c0	1	p3	(GAA)5	15	1	15	[D]	Cell cycle control, cell division, chromosome partitioning	Biological Process: meiosis (GO:0007126);; Cellular Component: intracellular part (GO:0044424);; Biological Process: regulation of cell cycle (GO:0051726);;	K06627|0.0|vvi:100250590|hypothetical protein LOC100250590	Cyclin-A1-3 OS=Oryza sativa subsp. japonica GN=CYCA1-3 PE=2 SV=2	PREDICTED: cyclin-A1-1-like [Vitis vinifera]
comp11297_c0	1	p1	(T)10	10	1306	1315	--	--	Molecular Function: metal ion binding (GO:0046872);; Biological Process: response to stimulus (GO:0050896);;	--	Zinc finger CCCH domain-containing protein 6 OS=Oryza sativa subsp. japonica GN=Os01g0258700 PE=2 SV=2	PREDICTED: zinc finger CCCH domain-containing protein 32 [Vitis vinifera]
comp1130_c0	1	p1	(T)13	13	1	13	[U]	Intracellular trafficking, secretion, and vesicular transport	Molecular Function: structural molecule activity (GO:0005198);; Biological Process: intracellular protein transport (GO:0006886);; Biological Process: vesicle-mediated transport (GO:0016192);; Cellular Component: COPI vesicle coat (GO:0030126);;	--	Coatomer subunit beta-1 OS=Oryza sativa subsp. japonica GN=Os11g0174000 PE=2 SV=1	Coatomer, beta subunit isoform 1 [Theobroma cacao]
comp11300_c1	1	p3	(CTG)5	15	1608	1622	--	--	Molecular Function: binding (GO:0005488);; Cellular Component: nucleus (GO:0005634);; Biological Process: transcription, DNA-templated (GO:0006351);;	--	Barley B recombinant-like protein D OS=Oryza sativa subsp. japonica GN=Os06g0130600 PE=2 SV=1	GAGA-binding transcriptional activator BBR/BPC6-like [Vitis vinifera]
comp11302_c0	1	p3	(GCC)5	15	678	692	[D]	Cell cycle control, cell division, chromosome partitioning	--	--	Uncharacterized protein LOC284861 OS=Homo sapiens PE=2 SV=1	Early nodulin-like protein 18 isoform 1 [Theobroma cacao]
comp11306_c0	1	p2	(CT)8	16	1118	1133	--	--	Cellular Component: integral component of peroxisomal membrane (GO:0005779);; Biological Process: fatty acid beta-oxidation (GO:0006635);; Molecular Function: protein C-terminus binding (GO:0008022);; Molecular Function: zinc ion binding (GO:0008270);; Biological Process: toxin catabolic process (GO:0009407);; Biological Process: protein import into peroxisome matrix (GO:0016558);; Biological Pro…	K13345|1e-162|sbi:SORBI_01g019750|hypothetical protein	Peroxisome biogenesis protein 12 OS=Arabidopsis thaliana GN=PEX12 PE=1 SV=2	PREDICTED: peroxisome biogenesis protein 12-like isoform X2 [Setaria italica]
comp11313_c0	1	p3	(TCT)6	18	345	362	#N/A	#N/A	#N/A	#N/A	#N/A	#N/A
comp11316_c0	1	p1	(C)10	10	55	64	--	--	Molecular Function: nucleic acid binding (GO:0003676);; Molecular Function: zinc ion binding (GO:0008270);;	--	--	PREDICTED: uncharacterized protein LOC100258751 [Vitis vinifera]
comp11320_c0	1	p1	(A)10	10	953	962	[R]	General function prediction only	Cellular Component: chloroplast (GO:0009507);; Biological Process: chlorophyll catabolic process (GO:0015996);; Molecular Function: pheophytinase activity (GO:0080124);;	--	--	predicted protein [Populus trichocarpa]
comp11325_c0	2	c	(AG)7---(AG)7	48	2283	2330	[J]	Translation, ribosomal structure and biogenesis	Molecular Function: amidase activity (GO:0004040);; Cellular Component: mitochondrion (GO:0005739);; Biological Process: protein targeting to membrane (GO:0006612);; Biological Process: protein targeting to mitochondrion (GO:0006626);; Biological Process: nucleotide transport (GO:0006862);; Biological Process: ER to Golgi vesicle-mediated transport (GO:0006888);; Biological Process: regulation of…	--	Outer envelope protein 64, mitochondrial OS=Arabidopsis thaliana GN=OM64 PE=1 SV=1	Translocon at the outer membrane of chloroplasts 64-V isoform 1 [Theobroma cacao]
comp11325_c0	1	p1	(A)10	10	292	301	[J]	Translation, ribosomal structure and biogenesis	Molecular Function: amidase activity (GO:0004040);; Cellular Component: mitochondrion (GO:0005739);; Biological Process: protein targeting to membrane (GO:0006612);; Biological Process: protein targeting to mitochondrion (GO:0006626);; Biological Process: nucleotide transport (GO:0006862);; Biological Process: ER to Golgi vesicle-mediated transport (GO:0006888);; Biological Process: regulation of…	--	Outer envelope protein 64, mitochondrial OS=Arabidopsis thaliana GN=OM64 PE=1 SV=1	Translocon at the outer membrane of chloroplasts 64-V isoform 1 [Theobroma cacao]
comp11327_c0	1	p2	(AT)10	20	1	20	--	--	Cellular Component: endoplasmic reticulum (GO:0005783);; Biological Process: proteolysis (GO:0006508);; Molecular Function: cysteine-type peptidase activity (GO:0008234);; Cellular Component: cytoplasmic membrane-bounded vesicle (GO:0016023);; Molecular Function: oxidoreductase activity (GO:0016491);;	K01365|1e-130|vvi:100250141|hypothetical protein LOC100250141	Vignain OS=Ricinus communis GN=CYSEP PE=1 SV=1	papain-like cysteine protease [Sandersonia aurantiaca]
comp11328_c0	1	p1	(A)10	10	110	119	--	--	Molecular Function: triglyceride lipase activity (GO:0004806);; Molecular Function: calmodulin binding (GO:0005516);; Biological Process: response to stress (GO:0006950);; Biological Process: lipid catabolic process (GO:0016042);;	--	Sn1-specific diacylglycerol lipase beta OS=Homo sapiens GN=DAGLB PE=1 SV=2	Alpha/beta-Hydrolases superfamily protein isoform 1 [Theobroma cacao]
comp11328_c0	2	p1	(A)14	14	2062	2075	--	--	Molecular Function: triglyceride lipase activity (GO:0004806);; Molecular Function: calmodulin binding (GO:0005516);; Biological Process: response to stress (GO:0006950);; Biological Process: lipid catabolic process (GO:0016042);;	--	Sn1-specific diacylglycerol lipase beta OS=Homo sapiens GN=DAGLB PE=1 SV=2	Alpha/beta-Hydrolases superfamily protein isoform 1 [Theobroma cacao]
comp11335_c0	1	p1	(A)10	10	100	109	--	--	--	--	Translation initiation factor IF-2 OS=Rhodococcus sp. (strain RHA1) GN=infB PE=3 SV=1	Actin cross-linking protein, putative [Theobroma cacao]
comp1134_c0	2	p1	(T)11	11	3111	3121	[I]	Lipid transport and metabolism	Biological Process: RNA splicing, via endonucleolytic cleavage and ligation (GO:0000394);; Molecular Function: iron ion binding (GO:0005506);; Biological Process: acetyl-CoA metabolic process (GO:0006084);; Biological Process: fatty acid biosynthetic process (GO:0006633);; Biological Process: calcium ion transport (GO:0006816);; Biological Process: Golgi organization (GO:0007030);; Biological Pro…	K14423|1e-159|osa:4349278|Os10g0545200	Methylsterol monooxygenase 1-1 OS=Arabidopsis thaliana GN=SMO1-1 PE=1 SV=1	Os10g0545200 [Oryza sativa Japonica Group]
comp1134_c0	1	p2	(CT)10	20	1823	1842	[I]	Lipid transport and metabolism	Biological Process: RNA splicing, via endonucleolytic cleavage and ligation (GO:0000394);; Molecular Function: iron ion binding (GO:0005506);; Biological Process: acetyl-CoA metabolic process (GO:0006084);; Biological Process: fatty acid biosynthetic process (GO:0006633);; Biological Process: calcium ion transport (GO:0006816);; Biological Process: Golgi organization (GO:0007030);; Biological Pro…	K14423|1e-159|osa:4349278|Os10g0545200	Methylsterol monooxygenase 1-1 OS=Arabidopsis thaliana GN=SMO1-1 PE=1 SV=1	Os10g0545200 [Oryza sativa Japonica Group]
comp11340_c0	1	p2	(GA)6	12	603	614	#N/A	#N/A	#N/A	#N/A	#N/A	#N/A
comp11349_c0	1	p3	(TCT)7	21	440	460	#N/A	#N/A	#N/A	#N/A	#N/A	#N/A
comp11356_c0	1	p1	(A)20	20	1	20	#N/A	#N/A	#N/A	#N/A	#N/A	#N/A
comp11356_c0	2	p2	(TC)9	18	1026	1043	#N/A	#N/A	#N/A	#N/A	#N/A	#N/A
comp11359_c0	1	p1	(T)10	10	256	265	--	--	--	K03363|1e-22|vvi:100250079|hypothetical protein LOC100250079	--	PREDICTED: anaphase-promoting complex subunit cdc20-like [Glycine max]
comp11370_c0	1	p2	(TG)6	12	812	823	--	--	Molecular Function: DNA binding (GO:0003677);; Biological Process: response to stress (GO:0006950);; Biological Process: regulation of cellular process (GO:0050794);;	--	--	hypothetical protein VITISV_033868 [Vitis vinifera]
comp11371_c0	1	c	(CAG)5---(GAT)5	44	2144	2187	--	--	Molecular Function: binding (GO:0005488);;	--	Putative clathrin assembly protein At4g25940 OS=Arabidopsis thaliana GN=At4g25940 PE=2 SV=1	predicted protein [Populus trichocarpa]
comp11372_c0	1	p2	(AG)6	12	1669	1680	[D]	Cell cycle control, cell division, chromosome partitioning	--	--	Cyclin-D5-3 OS=Oryza sativa subsp. japonica GN=CYCD5-3 PE=2 SV=1	cyclin d, putative [Ricinus communis]
comp11373_c0	1	p2	(CT)8	16	590	605	#N/A	#N/A	#N/A	#N/A	#N/A	#N/A
comp11374_c0	1	p1	(T)12	12	240	251	#N/A	#N/A	#N/A	#N/A	#N/A	#N/A
comp11378_c0	1	p1	(A)12	12	368	379	--	--	Cellular Component: mitochondrion (GO:0005739);; Cellular Component: plastid (GO:0009536);;	--	Protein ROOT PRIMORDIUM DEFECTIVE 1 OS=Arabidopsis thaliana GN=RPD1 PE=1 SV=1	PREDICTED: uncharacterized protein LOC101298272 [Fragaria vesca subsp. vesca]
comp11386_c0	1	p2	(TC)9	18	5	22	[H]	Coenzyme transport and metabolism	Molecular Function: uroporphyrinogen decarboxylase activity (GO:0004853);; Biological Process: tryptophan catabolic process (GO:0006569);; Biological Process: protoporphyrinogen IX biosynthetic process (GO:0006782);; Cellular Component: chloroplast stroma (GO:0009570);; Biological Process: indoleacetic acid biosynthetic process (GO:0009684);; Biological Process: response to cadmium ion (GO:004668…	K01599|0.0|vvi:100252130|hypothetical protein LOC100252130	Uroporphyrinogen decarboxylase 1, chloroplastic OS=Arabidopsis thaliana GN=HEME1 PE=2 SV=2	PREDICTED: uroporphyrinogen decarboxylase 1, chloroplastic-like [Glycine max]
comp11388_c0	1	p1	(T)16	16	1	16	#N/A	#N/A	#N/A	#N/A	#N/A	#N/A
comp11388_c0	2	p1	(A)12	12	312	323	#N/A	#N/A	#N/A	#N/A	#N/A	#N/A
comp1139_c0	1	p2	(TC)8	16	107	122	[O]	Posttranslational modification, protein turnover, chaperones	Biological Process: karyogamy (GO:0000741);; Molecular Function: DNA binding (GO:0003677);; Molecular Function: chromatin binding (GO:0003682);; Molecular Function: calmodulin binding (GO:0005516);; Molecular Function: ATP binding (GO:0005524);; Cellular Component: nucleus (GO:0005634);; Cellular Component: cytosol (GO:0005829);; Cellular Component: plasma membrane (GO:0005886);; Biological Proce…	K03065|0.0|vvi:100256329|hypothetical protein LOC100256329	26S protease regulatory subunit 6A homolog OS=Solanum lycopersicum GN=TBP1 PE=2 SV=1	PREDICTED: 26S protease regulatory subunit 6A homolog A-like [Glycine max]
comp11390_c0	2	p1	(G)12	12	1015	1026	--	--	Cellular Component: plastoglobule (GO:0010287);;	--	DCC family protein At1g52590, chloroplastic OS=Arabidopsis thaliana GN=At1g52590 PE=1 SV=1	PREDICTED: DCC family protein At1g52590, chloroplastic-like [Fragaria vesca subsp. vesca]
comp11390_c0	1	p2	(CT)6	12	147	158	--	--	Cellular Component: plastoglobule (GO:0010287);;	--	DCC family protein At1g52590, chloroplastic OS=Arabidopsis thaliana GN=At1g52590 PE=1 SV=1	PREDICTED: DCC family protein At1g52590, chloroplastic-like [Fragaria vesca subsp. vesca]
comp11398_c0	1	p1	(A)10	10	95	104	--	--	Cellular Component: extracellular region (GO:0005576);;	--	--	Os07g0564200 [Oryza sativa Japonica Group]
comp114_c0	1	p1	(A)11	11	181	191	[J]	Translation, ribosomal structure and biogenesis	Molecular Function: structural constituent of ribosome (GO:0003735);; Cellular Component: nucleolus (GO:0005730);; Biological Process: translation (GO:0006412);; Cellular Component: cytosolic large ribosomal subunit (GO:0022625);;	--	60S ribosomal protein L32-1 OS=Arabidopsis thaliana GN=RPL32A PE=2 SV=2	predicted protein [Populus trichocarpa]
comp11401_c0	1	p2	(TC)8	16	1133	1148	[R]	General function prediction only	Molecular Function: nucleotide binding (GO:0000166);; Molecular Function: estradiol 17-beta-dehydrogenase activity (GO:0004303);; Cellular Component: extracellular region (GO:0005576);; Cellular Component: endoplasmic reticulum (GO:0005783);; Cellular Component: plasma membrane (GO:0005886);; Biological Process: fatty acid beta-oxidation (GO:0006635);; Biological Process: protein import into pero…	--	Dehydrogenase/reductase SDR family member 7 OS=Homo sapiens GN=DHRS7 PE=1 SV=1	hypothetical protein PRUPE_ppa008500mg [Prunus persica]
comp11405_c0	1	c	(GT)8gc(GT)8	34	1724	1757	--	--	Biological Process: nuclear division (GO:0000280);; Biological Process: cytokinesis by cell plate formation (GO:0000911);; Biological Process: acetyl-CoA metabolic process (GO:0006084);; Biological Process: nucleolus organization (GO:0007000);; Biological Process: cell proliferation (GO:0008283);; Biological Process: regulation of flower development (GO:0009909);; Biological Process: epidermal ce…	--	--	PREDICTED: uncharacterized protein LOC100249551 [Vitis vinifera]
comp1141_c0	1	p3	(TGG)6	18	286	303	--	--	--	--	CYSTM1 family protein A OS=Arabidopsis thaliana GN=At2g41420 PE=3 SV=1	hypothetical protein PRUPE_ppa013355mg [Prunus persica]
comp11416_c0	1	p1	(T)11	11	388	398	#N/A	#N/A	#N/A	#N/A	#N/A	#N/A
comp1142_c0	1	p1	(T)10	10	49	58	--	--	Cellular Component: mitochondrial respiratory chain complex I (GO:0005747);; Biological Process: ubiquitin-dependent protein catabolic process (GO:0006511);; Biological Process: photorespiration (GO:0009853);; Biological Process: response to misfolded protein (GO:0051788);; Biological Process: proteasome core complex assembly (GO:0080129);;	--	Chitin-binding lectin 1 OS=Solanum tuberosum PE=1 SV=2	uncharacterized protein LOC100306629 [Glycine max]
comp1142_c0	2	p3	(CCG)5	15	1236	1250	--	--	Cellular Component: mitochondrial respiratory chain complex I (GO:0005747);; Biological Process: ubiquitin-dependent protein catabolic process (GO:0006511);; Biological Process: photorespiration (GO:0009853);; Biological Process: response to misfolded protein (GO:0051788);; Biological Process: proteasome core complex assembly (GO:0080129);;	--	Chitin-binding lectin 1 OS=Solanum tuberosum PE=1 SV=2	uncharacterized protein LOC100306629 [Glycine max]
comp11429_c0	1	p3	(TCT)6	18	442	459	--	--	Cellular Component: cell part (GO:0044464);;	--	Sec14 cytosolic factor OS=Schizosaccharomyces pombe (strain 972 / ATCC 24843) GN=sec14 PE=4 SV=1	unnamed protein product [Vitis vinifera]
comp11439_c0	1	p2	(TA)6	12	355	366	#N/A	#N/A	#N/A	#N/A	#N/A	#N/A
comp11440_c0	1	c	(CA)6---(CT)8	101	341	441	#N/A	#N/A	#N/A	#N/A	#N/A	#N/A
comp11451_c0	2	c	(A)12---(AG)7	64	735	798	#N/A	#N/A	#N/A	#N/A	#N/A	#N/A
comp11451_c0	1	p1	(T)11	11	257	267	#N/A	#N/A	#N/A	#N/A	#N/A	#N/A
comp11454_c0	1	c	(CT)8---(TTC)5	51	322	372	--	--	--	--	--	PREDICTED: BEL1-like homeodomain protein 4-like [Vitis vinifera]
comp11454_c0	2	p3	(CTG)7	21	759	779	--	--	--	--	--	PREDICTED: BEL1-like homeodomain protein 4-like [Vitis vinifera]
comp11455_c0	1	p1	(T)19	19	799	817	--	--	Molecular Function: nucleic acid binding (GO:0003676);; Biological Process: transcription, DNA-templated (GO:0006351);; Biological Process: response to auxin (GO:0009733);; Biological Process: hormone-mediated signaling pathway (GO:0009755);; Biological Process: regulation of biosynthetic process (GO:0009889);; Biological Process: floral organ development (GO:0048437);; Biological Process: floral…	--	Auxin response factor 18 OS=Oryza sativa subsp. japonica GN=ARF18 PE=2 SV=1	Auxin response factor 19 [Theobroma cacao]
comp11460_c0	1	p2	(CT)6	12	1	12	--	--	--	--	--	Oxidative stress 3, putative isoform 1 [Theobroma cacao]
comp11463_c0	1	p1	(T)11	11	1179	1189	--	--	Cellular Component: chloroplast (GO:0009507);;	--	--	PREDICTED: uncharacterized protein LOC100843907 [Brachypodium distachyon]
comp11465_c1	1	p2	(CT)6	12	738	749	[J]	Translation, ribosomal structure and biogenesis	Biological Process: very long-chain fatty acid metabolic process (GO:0000038);; Cellular Component: endoplasmic reticulum (GO:0005783);; Biological Process: response to cold (GO:0009409);; Biological Process: response to light stimulus (GO:0009416);; Biological Process: response to wounding (GO:0009611);; Biological Process: coumarin biosynthetic process (GO:0009805);; Molecular Function: fatty a…	--	3-ketoacyl-CoA synthase 1 OS=Arabidopsis thaliana GN=KCS1 PE=2 SV=1	PREDICTED: 3-ketoacyl-CoA synthase 1-like [Solanum lycopersicum]
comp11473_c0	1	p1	(T)15	15	3654	3668	--	--	Cellular Component: nucleus (GO:0005634);; Biological Process: Golgi to vacuole transport (GO:0006896);; Cellular Component: membrane coat (GO:0030117);; Biological Process: regulation of intracellular pH (GO:0051453);; Biological Process: lytic vacuole organization (GO:0080171);;	K12397|0.0|vvi:100251289|hypothetical protein LOC100251289	AP3-complex subunit beta-A OS=Arabidopsis thaliana GN=AP3BA PE=2 SV=2	PREDICTED: AP3-complex subunit beta-A-like [Vitis vinifera]
comp11474_c0	1	p3	(GAG)5	15	1416	1430	[K]	Transcription	Cellular Component: membrane (GO:0016020);; Cellular Component: cytoplasmic membrane-bounded vesicle (GO:0016023);;	K04505|1e-155|vvi:100263915|hypothetical protein LOC100263915	Presenilin-like protein At1g08700 OS=Arabidopsis thaliana GN=At1g08700 PE=2 SV=1	Presenilin-1 [Theobroma cacao]
comp11488_c0	1	p2	(TC)9	18	891	908	--	--	--	--	Cysteine-rich repeat secretory protein 12 OS=Arabidopsis thaliana GN=CRRSP12 PE=2 SV=2	hypothetical protein VITISV_021208 [Vitis vinifera]
comp11492_c0	1	p2	(AG)9	18	1	18	--	--	--	--	--	PREDICTED: uncharacterized protein LOC100826495 [Brachypodium distachyon]
comp11492_c0	2	p2	(GA)9	18	694	711	--	--	--	--	--	PREDICTED: uncharacterized protein LOC100826495 [Brachypodium distachyon]
comp11496_c0	1	p3	(CCT)5	15	31	45	[J]	Translation, ribosomal structure and biogenesis	Cellular Component: nucleus (GO:0005634);;	--	Translation initiation factor IF-2 OS=Streptomyces avermitilis (strain ATCC 31267 / DSM 46492 / JCM 5070 / NCIMB 12804 / NRRL 8165 / MA-4680) GN=infB PE=3 SV=1	PREDICTED: uncharacterized protein LOC100257058 isoform 1 [Vitis vinifera]
comp115_c1	1	p3	(TCT)20	60	690	749	--	--	Cellular Component: chloroplast thylakoid membrane (GO:0009535);; Biological Process: response to blue light (GO:0009637);; Biological Process: response to high light intensity (GO:0009644);; Cellular Component: photosystem II oxygen evolving complex (GO:0009654);; Biological Process: response to sucrose (GO:0009744);; Biological Process: response to red light (GO:0010114);; Biological Process: r…	K03541|2e-74|vvi:100243967|hypothetical protein LOC100243967	Photosystem II 10 kDa polypeptide, chloroplastic OS=Spinacia oleracea GN=PSBR PE=2 SV=1	chloroplast photosystem II protein [Wolffia arrhiza]
comp11511_c0	1	p3	(CTC)7	21	2	22	--	--	--	--	--	hypothetical protein RCOM_0452240 [Ricinus communis]
comp11513_c0	1	p2	(GA)8	16	590	605	[IQR]	--	Cellular Component: plasma membrane (GO:0005886);; Biological Process: metabolic process (GO:0008152);; Cellular Component: chloroplast inner membrane (GO:0009706);; Molecular Function: oxidoreductase activity (GO:0016491);;	--	Short-chain dehydrogenase TIC 32, chloroplastic OS=Arabidopsis thaliana GN=TIC32 PE=2 SV=1	PREDICTED: short-chain dehydrogenase TIC 32, chloroplastic [Vitis vinifera]
comp11515_c0	1	p2	(AG)6	12	1400	1411	--	--	--	--	--	hypothetical protein [Oryza minuta]
comp11519_c0	1	p2	(TC)6	12	32	43	#N/A	#N/A	#N/A	#N/A	#N/A	#N/A
comp11520_c0	1	p3	(GCG)6	18	1826	1843	[K]	Transcription	Molecular Function: DNA binding (GO:0003677);; Molecular Function: DNA-directed RNA polymerase activity (GO:0003899);; Cellular Component: nucleolus (GO:0005730);; Biological Process: transcription, DNA-templated (GO:0006351);; Biological Process: protein targeting to mitochondrion (GO:0006626);; Molecular Function: protein dimerization activity (GO:0046983);;	K03027|0.0|vvi:100248046|hypothetical protein LOC100248046	DNA-directed RNA polymerases I and III subunit rpac1 OS=Dictyostelium discoideum GN=polr1c PE=3 SV=1	PREDICTED: DNA-directed RNA polymerases I and III subunit RPAC1 [Vitis vinifera]
comp11521_c0	1	p3	(AGA)7	21	1	21	#N/A	#N/A	#N/A	#N/A	#N/A	#N/A
comp11523_c0	1	p3	(CGC)6	18	1715	1732	--	--	Cellular Component: mitochondrion (GO:0005739);; Cellular Component: integral component of membrane (GO:0016021);;	--	Transmembrane protein 135 OS=Homo sapiens GN=TMEM135 PE=2 SV=2	PREDICTED: uncharacterized protein LOC100240785 [Vitis vinifera]
comp1153_c0	1	p3	(CCT)8	24	2646	2669	[P]	Inorganic ion transport and metabolism	Molecular Function: NADPH-hemoprotein reductase activity (GO:0003958);; Molecular Function: iron ion binding (GO:0005506);; Cellular Component: endoplasmic reticulum membrane (GO:0005789);; Cellular Component: cytosol (GO:0005829);; Biological Process: ER to Golgi vesicle-mediated transport (GO:0006888);; Cellular Component: chloroplast (GO:0009507);; Biological Process: phenylpropanoid metabolic…	K00327|0.0|vvi:100240979|hypothetical protein LOC100240979	NADPH--cytochrome P450 reductase OS=Catharanthus roseus GN=CPR PE=2 SV=1	PREDICTED: NADPH--cytochrome P450 reductase-like [Vitis vinifera]
comp1153_c0	2	p3	(TGG)6	18	3113	3130	[P]	Inorganic ion transport and metabolism	Molecular Function: NADPH-hemoprotein reductase activity (GO:0003958);; Molecular Function: iron ion binding (GO:0005506);; Cellular Component: endoplasmic reticulum membrane (GO:0005789);; Cellular Component: cytosol (GO:0005829);; Biological Process: ER to Golgi vesicle-mediated transport (GO:0006888);; Cellular Component: chloroplast (GO:0009507);; Biological Process: phenylpropanoid metabolic…	K00327|0.0|vvi:100240979|hypothetical protein LOC100240979	NADPH--cytochrome P450 reductase OS=Catharanthus roseus GN=CPR PE=2 SV=1	PREDICTED: NADPH--cytochrome P450 reductase-like [Vitis vinifera]
comp1153_c0	3	p5	(GAGTG)5	25	3380	3404	[P]	Inorganic ion transport and metabolism	Molecular Function: NADPH-hemoprotein reductase activity (GO:0003958);; Molecular Function: iron ion binding (GO:0005506);; Cellular Component: endoplasmic reticulum membrane (GO:0005789);; Cellular Component: cytosol (GO:0005829);; Biological Process: ER to Golgi vesicle-mediated transport (GO:0006888);; Cellular Component: chloroplast (GO:0009507);; Biological Process: phenylpropanoid metabolic…	K00327|0.0|vvi:100240979|hypothetical protein LOC100240979	NADPH--cytochrome P450 reductase OS=Catharanthus roseus GN=CPR PE=2 SV=1	PREDICTED: NADPH--cytochrome P450 reductase-like [Vitis vinifera]
comp11531_c0	1	p2	(CG)7	14	2175	2188	[R]	General function prediction only	Biological Process: mitotic G2 phase (GO:0000085);; Biological Process: RNA processing (GO:0006396);; Biological Process: sister chromatid cohesion (GO:0007062);; Biological Process: reciprocal meiotic recombination (GO:0007131);; Biological Process: gamete generation (GO:0007276);; Biological Process: positive regulation of cell proliferation (GO:0008284);; Biological Process: response to xenobi…	K03354|0.0|vvi:100242558|hypothetical protein LOC100242558	Anaphase-promoting complex subunit 7 OS=Arabidopsis thaliana GN=APC7 PE=2 SV=1	PREDICTED: LOW QUALITY PROTEIN: anaphase-promoting complex subunit 7-like [Cucumis sativus]
comp11532_c0	1	p3	(TGA)5	15	738	752	--	--	Molecular Function: protein dimerization activity (GO:0046983);;	--	Transcription factor bHLH7 OS=Arabidopsis thaliana GN=BHLH7 PE=2 SV=1	Os07g0182200 [Oryza sativa Japonica Group]
comp11535_c0	1	p2	(AG)6	12	1247	1258	--	--	Biological Process: maltose metabolic process (GO:0000023);; Biological Process: pentose-phosphate shunt (GO:0006098);; Cellular Component: chloroplast thylakoid membrane (GO:0009535);; Biological Process: starch biosynthetic process (GO:0019252);; Biological Process: isopentenyl diphosphate biosynthetic process, methylerythritol 4-phosphate pathway (GO:0019288);; Biological Process: glucosinolat…	--	--	PREDICTED: uncharacterized protein LOC100255332 [Vitis vinifera]
comp11536_c0	1	p3	(ACT)8	24	684	707	[O]	Posttranslational modification, protein turnover, chaperones	--	K09518|1e-128|vvi:100267066|hypothetical protein LOC100267066	Chaperone protein dnaJ 49 OS=Arabidopsis thaliana GN=ATJ49 PE=2 SV=2	PREDICTED: chaperone protein dnaJ 49 [Vitis vinifera]
comp11537_c0	2	p2	(AG)9	18	375	392	#N/A	#N/A	#N/A	#N/A	#N/A	#N/A
comp11537_c0	1	p3	(CTT)6	18	147	164	#N/A	#N/A	#N/A	#N/A	#N/A	#N/A
comp11542_c0	1	p2	(AG)8	16	87	102	#N/A	#N/A	#N/A	#N/A	#N/A	#N/A
comp11543_c0	2	p1	(T)11	11	673	683	--	--	Biological Process: organ growth (GO:0035265);; Biological Process: regulation of cell proliferation (GO:0042127);; Biological Process: regulation of cell cycle (GO:0051726);;	--	TRM112-like protein At1g78190 OS=Arabidopsis thaliana GN=At1g78190 PE=2 SV=1	unknown [Picea sitchensis]
comp11543_c0	1	p3	(TCC)5	15	74	88	--	--	Biological Process: organ growth (GO:0035265);; Biological Process: regulation of cell proliferation (GO:0042127);; Biological Process: regulation of cell cycle (GO:0051726);;	--	TRM112-like protein At1g78190 OS=Arabidopsis thaliana GN=At1g78190 PE=2 SV=1	unknown [Picea sitchensis]
comp11545_c0	1	p2	(GA)8	16	339	354	[G]	Carbohydrate transport and metabolism	--	--	Leucine-rich repeat extensin-like protein 3 OS=Arabidopsis thaliana GN=LRX3 PE=1 SV=1	hypothetical protein ZEAMMB73_817356, partial [Zea mays]
comp11547_c0	1	p2	(GA)8	16	1	16	[P]	Inorganic ion transport and metabolism	Molecular Function: inositol-1,4-bisphosphate 1-phosphatase activity (GO:0004441);; Biological Process: sulfur compound metabolic process (GO:0006790);; Molecular Function: 3'(2'),5'-bisphosphate nucleotidase activity (GO:0008441);; Cellular Component: plastid (GO:0009536);; Biological Process: phosphatidylinositol phosphorylation (GO:0046854);;	K01082|0.0|pop:POPTR_771156|hypothetical protein	PAP-specific phosphatase HAL2-like OS=Arabidopsis thaliana GN=AHL PE=2 SV=1	predicted protein [Populus trichocarpa]
comp11548_c0	1	p3	(GGC)5	15	1706	1720	--	--	Biological Process: regulation of transcription, DNA-templated (GO:0006355);;	--	Scarecrow-like protein 4 OS=Arabidopsis thaliana GN=SCL4 PE=2 SV=1	PREDICTED: scarecrow-like protein 4-like [Vitis vinifera]
comp11548_c0	2	p3	(GCT)5	15	2178	2192	--	--	Biological Process: regulation of transcription, DNA-templated (GO:0006355);;	--	Scarecrow-like protein 4 OS=Arabidopsis thaliana GN=SCL4 PE=2 SV=1	PREDICTED: scarecrow-like protein 4-like [Vitis vinifera]
comp11552_c0	1	p2	(AG)10	20	557	576	--	--	Cellular Component: mitochondrion (GO:0005739);;	--	--	Uncharacterized protein TCM_034727 [Theobroma cacao]
comp11553_c0	1	p1	(T)20	20	1	20	#N/A	#N/A	#N/A	#N/A	#N/A	#N/A
comp11553_c0	3	p2	(AG)7	14	296	309	#N/A	#N/A	#N/A	#N/A	#N/A	#N/A
comp11553_c0	2	p3	(AGC)6	18	124	141	#N/A	#N/A	#N/A	#N/A	#N/A	#N/A
comp11554_c0	1	p1	(A)18	18	1	18	#N/A	#N/A	#N/A	#N/A	#N/A	#N/A
comp11557_c0	1	p1	(A)21	21	1	21	#N/A	#N/A	#N/A	#N/A	#N/A	#N/A
comp11558_c0	1	p3	(CGG)5	15	104	118	--	--	--	--	Translation initiation factor IF-2 OS=Mycobacterium sp. (strain MCS) GN=infB PE=3 SV=1	conserved hypothetical protein [Ricinus communis]
comp11562_c0	1	p3	(AAG)7	21	351	371	--	--	Cellular Component: nucleus (GO:0005634);; Cellular Component: endoplasmic reticulum lumen (GO:0005788);; Biological Process: embryo development (GO:0009790);; Biological Process: pollen tube guidance (GO:0010183);; Cellular Component: membrane (GO:0016020);; Biological Process: maintenance of protein localization in endoplasmic reticulum (GO:0035437);;	--	Protein POLLEN DEFECTIVE IN GUIDANCE 1 OS=Arabidopsis thaliana GN=POD1 PE=1 SV=1	hypothetical protein ZEAMMB73_130714 [Zea mays]
comp11564_c0	1	p3	(CTC)5	15	182	196	[H]	Coenzyme transport and metabolism	Cellular Component: plastid (GO:0009536);; Molecular Function: transferase activity, transferring phosphorus-containing groups (GO:0016772);; Biological Process: cellular metabolic process (GO:0044237);;	--	Riboflavin biosynthesis protein RibF OS=Buchnera aphidicola subsp. Acyrthosiphon pisum (strain APS) GN=ribF PE=3 SV=1	unknow protein [Oryza sativa Japonica Group]
comp11569_c0	1	p2	(TC)10	20	1	20	--	--	Molecular Function: hydrolase activity, hydrolyzing O-glycosyl compounds (GO:0004553);; Biological Process: metabolic process (GO:0008152);; Cellular Component: plastid (GO:0009536);;	--	Alkaline/neutral invertase CINV2 OS=Arabidopsis thaliana GN=CINV2 PE=2 SV=1	Alkaline/neutral invertase isoform 3, partial [Theobroma cacao]
comp1157_c0	1	p1	(T)11	11	565	575	--	--	Cellular Component: mitochondrial inner membrane (GO:0005743);; Cellular Component: vacuolar membrane (GO:0005774);; Cellular Component: plasma membrane (GO:0005886);; Biological Process: glycolysis (GO:0006096);; Biological Process: postreplication repair (GO:0006301);; Biological Process: mitochondrial pyruvate transport (GO:0006850);; Biological Process: aerobic respiration (GO:0009060);; Cell…	--	Probable mitochondrial pyruvate carrier 2 OS=Schizosaccharomyces pombe (strain 972 / ATCC 24843) GN=SPCC1235.11 PE=3 SV=3	unknown [Picea sitchensis]
comp11577_c0	1	p1	(A)13	13	1	13	--	--	Biological Process: single-organism process (GO:0044699);;	--	Telomere repeat-binding factor 3 OS=Arabidopsis thaliana GN=TRB3 PE=1 SV=1	PREDICTED: uncharacterized protein LOC100244907 [Vitis vinifera]
comp11579_c0	1	p2	(GC)10	20	736	755	--	--	--	--	--	hypothetical protein CARUB_v100151920mg, partial [Capsella rubella]
comp11583_c0	1	p1	(T)17	17	379	395	#N/A	#N/A	#N/A	#N/A	#N/A	#N/A
comp1159_c0	1	p2	(TA)9	18	783	800	--	--	Molecular Function: metal ion binding (GO:0046872);;	--	Chemocyanin OS=Lilium longiflorum PE=1 SV=1	PREDICTED: chemocyanin-like [Setaria italica]
comp11590_c0	1	p1	(A)13	13	115	127	--	--	--	--	Pathogenesis-related genes transcriptional activator PTI6 OS=Solanum lycopersicum GN=PTI6 PE=2 SV=1	PREDICTED: ethylene-responsive transcription factor ERF118-like [Cucumis sativus]
comp11590_c0	2	p3	(GAA)5	15	1432	1446	--	--	--	--	Pathogenesis-related genes transcriptional activator PTI6 OS=Solanum lycopersicum GN=PTI6 PE=2 SV=1	PREDICTED: ethylene-responsive transcription factor ERF118-like [Cucumis sativus]
comp11599_c0	1	p3	(TGA)5	15	1419	1433	--	--	--	--	--	PREDICTED: uncharacterized protein LOC101764908 isoform X1 [Setaria italica]
comp116_c0	1	p3	(CAG)5	15	376	390	--	--	Molecular Function: calcium ion binding (GO:0005509);; Cellular Component: mitochondrion (GO:0005739);; Cellular Component: vacuole (GO:0005773);; Cellular Component: endoplasmic reticulum (GO:0005783);; Cellular Component: plasma membrane (GO:0005886);; Biological Process: protein folding (GO:0006457);; Cellular Component: plant-type cell wall (GO:0009505);; Cellular Component: chloroplast (GO:0…	K08054|0.0|vvi:100260960|hypothetical protein LOC100260960	Calnexin homolog OS=Glycine max PE=2 SV=1	PREDICTED: calnexin homolog 1 [Vitis vinifera]
comp1161_c0	1	c	(CT)6---(AT)6	30	420	449	#N/A	#N/A	#N/A	#N/A	#N/A	#N/A
comp11611_c0	1	p1	(G)14	14	1212	1225	--	--	Cellular Component: mitochondrion (GO:0005739);; Cellular Component: vacuolar membrane (GO:0005774);; Cellular Component: plastid (GO:0009536);;	--	Uncharacterized protein C23H3.12c OS=Schizosaccharomyces pombe (strain 972 / ATCC 24843) GN=SPAC23H3.12c PE=4 SV=1	predicted protein [Populus trichocarpa]
comp11614_c0	1	c	(C)10---(T)10	69	11	79	--	--	Molecular Function: methyltransferase activity (GO:0008168);; Biological Process: methylation (GO:0032259);;	--	--	unknown [Lotus japonicus]
comp11616_c0	1	p1	(A)11	11	3554	3564	--	--	Cellular Component: nucleus (GO:0005634);; Molecular Function: zinc ion binding (GO:0008270);;	--	Mucin-5AC (Fragments) OS=Homo sapiens GN=MUC5AC PE=1 SV=3	unnamed protein product [Vitis vinifera]
comp11631_c0	1	p2	(CT)9	18	1995	2012	--	--	--	--	Basic proline-rich protein OS=Sus scrofa PE=1 SV=2	PREDICTED: EIN3-binding F-box protein 1-like [Vitis vinifera]
comp11632_c0	1	p1	(T)10	10	572	581	[L]	Replication, recombination and repair	Molecular Function: single-stranded DNA binding (GO:0003697);; Cellular Component: mitochondrion (GO:0005739);; Biological Process: DNA replication (GO:0006260);; Biological Process: methylglyoxal catabolic process to D-lactate (GO:0019243);;	--	Single-stranded DNA-binding protein, mitochondrial OS=Arabidopsis thaliana GN=At4g11060 PE=2 SV=1	Os05g0509700 [Oryza sativa Japonica Group]
comp11637_c0	2	p2	(CT)8	16	526	541	--	--	Cellular Component: vacuolar membrane (GO:0005774);; Biological Process: phosphatidylinositol biosynthetic process (GO:0006661);; Molecular Function: metal ion binding (GO:0046872);;	K13148|2e-44|vvi:100261060|hypothetical protein LOC100261060	E3 ubiquitin protein ligase RIE1 OS=Arabidopsis thaliana GN=RIE1 PE=2 SV=1	Zinc finger isoform 2 [Theobroma cacao]
comp11637_c0	1	p3	(CTC)6	18	56	73	--	--	Cellular Component: vacuolar membrane (GO:0005774);; Biological Process: phosphatidylinositol biosynthetic process (GO:0006661);; Molecular Function: metal ion binding (GO:0046872);;	K13148|2e-44|vvi:100261060|hypothetical protein LOC100261060	E3 ubiquitin protein ligase RIE1 OS=Arabidopsis thaliana GN=RIE1 PE=2 SV=1	Zinc finger isoform 2 [Theobroma cacao]
comp11639_c0	1	p1	(A)11	11	2020	2030	--	--	--	--	Protein CHUP1, chloroplastic OS=Arabidopsis thaliana GN=CHUP1 PE=1 SV=1	Actin binding family protein, putative isoform 2 [Theobroma cacao]
comp1164_c0	1	c	(C)10---(TCT)7	45	1584	1628	[O]	Posttranslational modification, protein turnover, chaperones	Cellular Component: endosome (GO:0005768);; Cellular Component: vacuolar membrane (GO:0005774);; Cellular Component: Golgi apparatus (GO:0005794);; Cellular Component: trans-Golgi network (GO:0005802);; Cellular Component: plasma membrane (GO:0005886);; Molecular Function: transferase activity, transferring glycosyl groups (GO:0016757);;	--	[Protein-PII] uridylyltransferase OS=Gluconobacter oxydans (strain 621H) GN=glnD PE=3 SV=1	conserved hypothetical protein [Ricinus communis]
comp11645_c0	1	p2	(AG)8	16	2436	2451	--	--	Cellular Component: plastid (GO:0009536);; Biological Process: dephosphorylation (GO:0016311);; Molecular Function: oxidoreductase activity (GO:0016491);; Biological Process: lipid modification (GO:0030258);; Biological Process: inositol phosphate metabolic process (GO:0043647);; Molecular Function: inositol trisphosphate phosphatase activity (GO:0046030);; Biological Process: phosphatidylinosito…	--	Type I inositol 1,4,5-trisphosphate 5-phosphatase 1 OS=Arabidopsis thaliana GN=IP5P1 PE=1 SV=2	PREDICTED: type I inositol-1,4,5-trisphosphate 5-phosphatase 1-like [Vitis vinifera]
comp11652_c0	1	p3	(TCG)5	15	6459	6473	--	--	Biological Process: protein glycosylation (GO:0006486);;	--	Vacuolar protein sorting-associated protein 8 homolog OS=Homo sapiens GN=VPS8 PE=1 SV=3	unnamed protein product [Vitis vinifera]
comp11657_c0	1	p1	(T)10	10	457	466	--	--	Molecular Function: glycine-tRNA ligase activity (GO:0004820);; Molecular Function: ATP binding (GO:0005524);; Cellular Component: mitochondrion (GO:0005739);; Biological Process: glycyl-tRNA aminoacylation (GO:0006426);; Biological Process: response to cadmium ion (GO:0046686);;	K01880|2e-14|vvi:100257704|hypothetical protein LOC100257704	--	unknown [Picea sitchensis]
comp11660_c0	1	p2	(AG)10	20	1	20	--	--	--	--	Uncharacterized protein At1g76070 OS=Arabidopsis thaliana GN=At1g76070 PE=1 SV=1	conserved hypothetical protein [Ricinus communis]
comp11660_c0	3	p2	(AT)7	14	947	960	--	--	--	--	Uncharacterized protein At1g76070 OS=Arabidopsis thaliana GN=At1g76070 PE=1 SV=1	conserved hypothetical protein [Ricinus communis]
comp11660_c0	2	p3	(CCT)6	18	739	756	--	--	--	--	Uncharacterized protein At1g76070 OS=Arabidopsis thaliana GN=At1g76070 PE=1 SV=1	conserved hypothetical protein [Ricinus communis]
comp11663_c0	1	p3	(CGG)5	15	1950	1964	--	--	Biological Process: response to light stimulus (GO:0009416);; Cellular Component: plastid (GO:0009536);; Biological Process: response to auxin (GO:0009733);; Molecular Function: indole-3-acetic acid amido synthetase activity (GO:0010279);; Cellular Component: cytoplasmic membrane-bounded vesicle (GO:0016023);; Biological Process: secretion by cell (GO:0032940);;	K14487|0.0|vvi:100250741|hypothetical protein LOC100250741	Probable indole-3-acetic acid-amido synthetase GH3.1 OS=Arabidopsis thaliana GN=GH3.1 PE=2 SV=1	Auxin-responsive GH3 family protein [Theobroma cacao]
comp11664_c0	1	p2	(AG)9	18	1	18	[S]	Function unknown	Cellular Component: chloroplast (GO:0009507);;	--	--	hypothetical protein PRUPE_ppa024779mg [Prunus persica]
comp1167_c0	1	p3	(ATG)5	15	2627	2641	[O]	Posttranslational modification, protein turnover, chaperones	Molecular Function: ATP binding (GO:0005524);; Biological Process: ATP catabolic process (GO:0006200);; Biological Process: response to heat (GO:0009408);; Cellular Component: chloroplast stroma (GO:0009570);; Biological Process: chloroplast organization (GO:0009658);; Biological Process: protein processing (GO:0016485);; Molecular Function: ATPase activity (GO:0016887);;	K03695|0.0|vvi:100252611|hypothetical protein LOC100252611	Chaperone protein ClpB3, chloroplastic OS=Arabidopsis thaliana GN=CLPB3 PE=2 SV=1	PREDICTED: chaperone protein ClpB3, chloroplastic-like [Vitis vinifera]
comp11672_c0	1	p1	(T)10	10	293	302	--	--	--	--	--	putative protein [Arabidopsis thaliana]
comp11676_c0	1	p2	(GA)7	14	588	601	--	--	--	--	E3 ubiquitin-protein ligase RMA1H1 OS=Capsicum annuum GN=RMA1H1 PE=1 SV=1	RING membrane-anchor 1, putative isoform 2 [Theobroma cacao]
comp11679_c0	2	p1	(A)10	10	1735	1744	#N/A	#N/A	#N/A	#N/A	#N/A	#N/A
comp11679_c0	1	p3	(AAT)6	18	892	909	#N/A	#N/A	#N/A	#N/A	#N/A	#N/A
comp11682_c0	1	p1	(T)13	13	82	94	[O]	Posttranslational modification, protein turnover, chaperones	Molecular Function: ATP binding (GO:0005524);; Cellular Component: plasma membrane (GO:0005886);; Biological Process: ATP catabolic process (GO:0006200);; Cellular Component: chloroplast (GO:0009507);; Molecular Function: ATPase activity (GO:0016887);; Biological Process: protein metabolic process (GO:0019538);;	--	Protein cfxQ homolog OS=Porphyra purpurea GN=cfxQ PE=3 SV=1	PREDICTED: caseinolytic peptidase B protein homolog [Vitis vinifera]
comp1169_c0	1	p1	(T)11	11	1132	1142	[F]	Nucleotide transport and metabolism	Molecular Function: cytidylate kinase activity (GO:0004127);; Molecular Function: uridine kinase activity (GO:0004849);; Molecular Function: ATP binding (GO:0005524);; Cellular Component: nucleus (GO:0005634);; Cellular Component: cytosol (GO:0005829);; Biological Process: UMP biosynthetic process (GO:0006222);; Molecular Function: uridylate kinase activity (GO:0009041);; Molecular Function: nucl…	K13800|1e-112|osa:4330910|Os02g0778400	UMP-CMP kinase OS=Arabidopsis thaliana GN=PYR6 PE=1 SV=1	Os02g0778400 [Oryza sativa Japonica Group]
comp11690_c0	1	p1	(T)10	10	264	273	#N/A	#N/A	#N/A	#N/A	#N/A	#N/A
comp11700_c0	1	p2	(TC)10	20	1	20	[QR]	--	Biological Process: tRNA wobble uridine modification (GO:0002098);; Cellular Component: mitochondrion (GO:0005739);; Molecular Function: tRNA methyltransferase activity (GO:0008175);; Biological Process: tRNA methylation (GO:0030488);;	--	Alkylated DNA repair protein alkB homolog 8 OS=Mus musculus GN=Alkbh8 PE=2 SV=1	PREDICTED: alkylated DNA repair protein alkB homolog 8 [Vitis vinifera]
comp11702_c0	1	p3	(GAA)6	18	1	18	--	--	--	--	--	PREDICTED: uncharacterized protein LOC101764186 [Setaria italica]
comp11703_c0	1	p3	(GGC)6	18	106	123	--	--	--	--	Atherin OS=Oryctolagus cuniculus GN=SAMD1 PE=2 SV=1	PREDICTED: polyadenylate-binding protein RBP47C-like [Cucumis sativus]
comp11704_c0	1	c	(TG)10agagt(GA)9	43	38	80	--	--	Molecular Function: monooxygenase activity (GO:0004497);; Molecular Function: oxidoreductase activity, acting on paired donors, with incorporation or reduction of molecular oxygen (GO:0016705);; Molecular Function: metal ion binding (GO:0046872);; Cellular Component: cell periphery (GO:0071944);;	--	Flavonoid 3&apos;,5&apos;-hydroxylase OS=Solanum melongena GN=CYP75A2 PE=2 SV=1	PREDICTED: cytochrome P450 93A1-like [Vitis vinifera]
comp11705_c1	3	p2	(GA)6	12	854	865	--	--	--	--	Transcription factor UNE12 OS=Arabidopsis thaliana GN=UNE12 PE=2 SV=2	PREDICTED: transcription factor UNE12 [Vitis vinifera]
comp11705_c1	4	p2	(GA)7	14	986	999	--	--	--	--	Transcription factor UNE12 OS=Arabidopsis thaliana GN=UNE12 PE=2 SV=2	PREDICTED: transcription factor UNE12 [Vitis vinifera]
comp11705_c1	1	p3	(GGA)5	15	491	505	--	--	--	--	Transcription factor UNE12 OS=Arabidopsis thaliana GN=UNE12 PE=2 SV=2	PREDICTED: transcription factor UNE12 [Vitis vinifera]
comp11705_c1	2	p3	(AGG)6	18	690	707	--	--	--	--	Transcription factor UNE12 OS=Arabidopsis thaliana GN=UNE12 PE=2 SV=2	PREDICTED: transcription factor UNE12 [Vitis vinifera]
comp11707_c0	1	p1	(A)10	10	128	137	--	--	Molecular Function: acetylglucosaminyltransferase activity (GO:0008375);; Cellular Component: membrane (GO:0016020);;	--	Xylosyltransferase 1 (Fragment) OS=Rattus norvegicus GN=Xylt1 PE=2 SV=1	PREDICTED: xylosyltransferase 1-like [Setaria italica]
comp11707_c0	2	p3	(GGA)5	15	1783	1797	--	--	Molecular Function: acetylglucosaminyltransferase activity (GO:0008375);; Cellular Component: membrane (GO:0016020);;	--	Xylosyltransferase 1 (Fragment) OS=Rattus norvegicus GN=Xylt1 PE=2 SV=1	PREDICTED: xylosyltransferase 1-like [Setaria italica]
comp11710_c0	1	p2	(TA)6	12	2065	2076	#N/A	#N/A	#N/A	#N/A	#N/A	#N/A
comp11717_c0	1	p1	(A)13	13	77	89	--	--	--	--	--	hypothetical protein PRUPE_ppa014150mg [Prunus persica]
comp1173_c0	1	p2	(AG)8	16	979	994	[B]	Chromatin structure and dynamics	Cellular Component: nucleosome (GO:0000786);; Molecular Function: DNA binding (GO:0003677);; Cellular Component: nucleus (GO:0005634);; Cellular Component: vacuole (GO:0005773);; Biological Process: nucleosome assembly (GO:0006334);; Biological Process: chromatin remodeling (GO:0006338);; Biological Process: regulation of flower development (GO:0009909);; Biological Process: detection of temperat…	K11251|2e-80|vvi:100249276|hypothetical protein LOC100249276	Probable histone H2A variant 3 OS=Arabidopsis thaliana GN=At1g52740 PE=1 SV=1	hypothetical protein PRUPE_ppa013175mg [Prunus persica]
comp11730_c0	1	p2	(GA)8	16	148	163	--	--	--	--	--	PREDICTED: uncharacterized protein LOC100267886 [Vitis vinifera]
comp11730_c0	2	p2	(TC)7	14	555	568	--	--	--	--	--	PREDICTED: uncharacterized protein LOC100267886 [Vitis vinifera]
comp11731_c0	1	c	(T)11cc(A)10	23	2541	2563	[J]	Translation, ribosomal structure and biogenesis	--	--	Serine/arginine repetitive matrix protein 2 OS=Homo sapiens GN=SRRM2 PE=1 SV=2	hypothetical protein PRUPE_ppb003710mg [Prunus persica]
comp11734_c0	1	p3	(CTC)5	15	87	101	--	--	--	--	Uncharacterized protein DDB_G0271670 OS=Dictyostelium discoideum GN=DDB_G0271670 PE=4 SV=1	PREDICTED: uncharacterized protein LOC100253614 [Vitis vinifera]
comp1174_c0	1	p2	(AC)9	18	8	25	[V]	Defense mechanisms	Cellular Component: vacuolar membrane (GO:0005774);; Cellular Component: plasma membrane (GO:0005886);; Biological Process: drug transmembrane transport (GO:0006855);; Molecular Function: drug transmembrane transporter activity (GO:0015238);; Molecular Function: antiporter activity (GO:0015297);;	--	MATE efflux family protein 5 OS=Arabidopsis thaliana GN=DTXL1 PE=3 SV=1	PREDICTED: MATE efflux family protein 5 [Vitis vinifera]
comp11744_c0	1	p3	(ACG)7	21	1	21	--	--	--	--	E3 ubiquitin-protein ligase SINA-like 10 OS=Arabidopsis thaliana GN=At5g37930 PE=2 SV=1	hypothetical protein OsI_22706 [Oryza sativa Indica Group]
comp11745_c0	1	p2	(AG)6	12	22	33	--	--	Biological Process: nuclear-transcribed mRNA catabolic process (GO:0000956);; Molecular Function: DNA binding (GO:0003677);; Molecular Function: sequence-specific DNA binding transcription factor activity (GO:0003700);; Molecular Function: calmodulin binding (GO:0005516);; Cellular Component: nucleus (GO:0005634);; Biological Process: protein N-linked glycosylation (GO:0006487);; Biological Proce…	--	NAC domain-containing protein 74 OS=Oryza sativa subsp. japonica GN=NAC74 PE=2 SV=1	PREDICTED: uncharacterized protein LOC100838012 [Brachypodium distachyon]
comp11749_c0	1	p3	(CTT)7	21	1	21	--	--	Cellular Component: nucleus (GO:0005634);;	--	--	predicted protein [Populus trichocarpa]
comp11752_c0	1	p2	(TC)7	14	1079	1092	--	--	Molecular Function: metal ion binding (GO:0046872);;	--	Zinc finger protein 511 OS=Danio rerio GN=znf511 PE=2 SV=1	PREDICTED: zinc finger protein 511-like [Setaria italica]
comp1176_c0	1	p2	(GA)10	20	2	21	--	--	Cellular Component: plasma membrane (GO:0005886);; Cellular Component: coated pit (GO:0005905);; Biological Process: organelle organization (GO:0006996);; Biological Process: vesicle-mediated transport (GO:0016192);; Cellular Component: clathrin coat (GO:0030118);; Cellular Component: cytoplasmic vesicle membrane (GO:0030659);; Biological Process: single-organism transport (GO:0044765);; Biologic…	--	Clathrin light chain 2 OS=Oryza sativa subsp. japonica GN=Os06g0731800 PE=2 SV=1	PREDICTED: clathrin light chain 1-like [Vitis vinifera]
comp1176_c0	2	p3	(GCT)5	15	1059	1073	--	--	Cellular Component: plasma membrane (GO:0005886);; Cellular Component: coated pit (GO:0005905);; Biological Process: organelle organization (GO:0006996);; Biological Process: vesicle-mediated transport (GO:0016192);; Cellular Component: clathrin coat (GO:0030118);; Cellular Component: cytoplasmic vesicle membrane (GO:0030659);; Biological Process: single-organism transport (GO:0044765);; Biologic…	--	Clathrin light chain 2 OS=Oryza sativa subsp. japonica GN=Os06g0731800 PE=2 SV=1	PREDICTED: clathrin light chain 1-like [Vitis vinifera]
comp11764_c0	1	p2	(GA)8	16	198	213	[S]	Function unknown	Molecular Function: catalytic activity (GO:0003824);; Cellular Component: vacuole (GO:0005773);; Biological Process: metabolic process (GO:0008152);; Cellular Component: plant-type cell wall (GO:0009505);;	K09955|6e-63|vvi:100246702|hypothetical protein LOC100246702	Formin-like protein 5 OS=Oryza sativa subsp. japonica GN=FH5 PE=2 SV=2	hypothetical protein MTR_4g065150 [Medicago truncatula]
comp1177_c0	1	p1	(T)11	11	1831	1841	[R]	General function prediction only	Molecular Function: peptidase activity (GO:0008233);; Cellular Component: plastid (GO:0009536);; Cellular Component: membrane (GO:0016020);; Biological Process: carboxylic acid metabolic process (GO:0019752);; Biological Process: indole-containing compound metabolic process (GO:0042430);; Biological Process: primary metabolic process (GO:0044238);;	--	--	hypothetical protein SORBIDRAFT_10g020020 [Sorghum bicolor]
comp1177_c1	1	p1	(C)12	12	2581	2592	--	--	Cellular Component: endosome (GO:0005768);; Cellular Component: trans-Golgi network (GO:0005802);; Biological Process: regulation of meristem growth (GO:0010075);; Biological Process: homogalacturonan biosynthetic process (GO:0010289);; Molecular Function: polygalacturonate 4-alpha-galacturonosyltransferase activity (GO:0047262);;	K13648|0.0|vvi:100252372|similar to GAUT1/LGT1 (Galacturonosyltransferase 1)	Polygalacturonate 4-alpha-galacturonosyltransferase OS=Arabidopsis thaliana GN=GAUT1 PE=1 SV=1	unnamed protein product [Vitis vinifera]
comp11770_c0	1	p1	(T)16	16	929	944	#N/A	#N/A	#N/A	#N/A	#N/A	#N/A
comp11773_c0	1	p3	(CAC)5	15	30	44	#N/A	#N/A	#N/A	#N/A	#N/A	#N/A
comp11777_c0	1	p1	(T)12	12	1259	1270	--	--	Molecular Function: ubiquitin thiolesterase activity (GO:0004221);; Molecular Function: ubiquitin-specific protease activity (GO:0004843);; Cellular Component: mitochondrion (GO:0005739);; Biological Process: ubiquitin-dependent protein catabolic process (GO:0006511);; Molecular Function: zinc ion binding (GO:0008270);; Cellular Component: plastid (GO:0009536);;	K11366|1e-171|rcu:RCOM_0003510|Ubiquitin carboxyl-terminal hydrolase, putative (EC:3.1.2.15)	Ubiquitin carboxyl-terminal hydrolase 22 OS=Arabidopsis thaliana GN=UBP22 PE=2 SV=1	PREDICTED: ubiquitin carboxyl-terminal hydrolase 22-like [Vitis vinifera]
comp11779_c0	1	p1	(T)12	12	878	889	#N/A	#N/A	#N/A	#N/A	#N/A	#N/A
comp11779_c0	2	p1	(A)13	13	1727	1739	#N/A	#N/A	#N/A	#N/A	#N/A	#N/A
comp1178_c0	1	p2	(GA)6	12	51	62	[R]	General function prediction only	Molecular Function: zinc ion binding (GO:0008270);; Molecular Function: 2-alkenal reductase [NAD(P)] activity (GO:0032440);; Biological Process: oxidation-reduction process (GO:0055114);;	--	2-alkenal reductase (NADP(+)-dependent) OS=Nicotiana tabacum GN=DBR PE=1 SV=1	hypothetical protein OsI_16484 [Oryza sativa Indica Group]
comp11781_c0	1	p3	(CAG)6	18	288	305	--	--	--	--	Nuclear receptor coactivator 6 OS=Homo sapiens GN=NCOA6 PE=1 SV=3	PREDICTED: uncharacterized protein LOC100258588 [Vitis vinifera]
comp11786_c0	1	c	(T)17---(T)13	80	1	80	#N/A	#N/A	#N/A	#N/A	#N/A	#N/A
comp11787_c0	1	p3	(GAG)5	15	104	118	--	--	--	--	--	PREDICTED: uncharacterized protein LOC100261429 [Vitis vinifera]
comp11793_c0	1	p1	(T)11	11	834	844	#N/A	#N/A	#N/A	#N/A	#N/A	#N/A
comp11793_c0	2	p2	(CT)7	14	2209	2222	#N/A	#N/A	#N/A	#N/A	#N/A	#N/A
comp11799_c0	1	p2	(GA)6	12	12	23	[S]	Function unknown	Molecular Function: protein kinase activity (GO:0004672);; Molecular Function: ATP binding (GO:0005524);; Biological Process: protein phosphorylation (GO:0006468);; Cellular Component: integral component of membrane (GO:0016021);; Cellular Component: cytoplasmic membrane-bounded vesicle (GO:0016023);;	--	Protein STRUBBELIG-RECEPTOR FAMILY 7 OS=Arabidopsis thaliana GN=SRF7 PE=1 SV=1	PREDICTED: protein STRUBBELIG-RECEPTOR FAMILY 6-like isoform 2 [Vitis vinifera]
comp11799_c0	2	p3	(TGG)7	21	964	984	[S]	Function unknown	Molecular Function: protein kinase activity (GO:0004672);; Molecular Function: ATP binding (GO:0005524);; Biological Process: protein phosphorylation (GO:0006468);; Cellular Component: integral component of membrane (GO:0016021);; Cellular Component: cytoplasmic membrane-bounded vesicle (GO:0016023);;	--	Protein STRUBBELIG-RECEPTOR FAMILY 7 OS=Arabidopsis thaliana GN=SRF7 PE=1 SV=1	PREDICTED: protein STRUBBELIG-RECEPTOR FAMILY 6-like isoform 2 [Vitis vinifera]
comp118_c1	1	c	(TCT)5---(TCT)5	36	217	252	--	--	Biological Process: very long-chain fatty acid metabolic process (GO:0000038);; Biological Process: sulfur amino acid metabolic process (GO:0000096);; Biological Process: polysaccharide biosynthetic process (GO:0000271);; Cellular Component: endoplasmic reticulum (GO:0005783);; Biological Process: glycine catabolic process (GO:0006546);; Biological Process: unsaturated fatty acid biosynthetic pro…	--	3-ketoacyl-CoA synthase 6 OS=Arabidopsis thaliana GN=CUT1 PE=1 SV=1	3-ketoacyl-CoA synthase [Arachis hypogaea]
comp118_c1	2	p3	(CTC)5	15	1979	1993	--	--	Biological Process: very long-chain fatty acid metabolic process (GO:0000038);; Biological Process: sulfur amino acid metabolic process (GO:0000096);; Biological Process: polysaccharide biosynthetic process (GO:0000271);; Cellular Component: endoplasmic reticulum (GO:0005783);; Biological Process: glycine catabolic process (GO:0006546);; Biological Process: unsaturated fatty acid biosynthetic pro…	--	3-ketoacyl-CoA synthase 6 OS=Arabidopsis thaliana GN=CUT1 PE=1 SV=1	3-ketoacyl-CoA synthase [Arachis hypogaea]
comp11800_c0	2	p1	(A)11	11	1844	1854	[GC]	--	Cellular Component: mitochondrion (GO:0005739);;	--	Sterol 3-beta-glucosyltransferase UGT80B1 OS=Arabidopsis thaliana GN=UGT80B1 PE=2 SV=1	PREDICTED: sterol 3-beta-glucosyltransferase-like [Vitis vinifera]
comp11800_c0	1	p3	(ACC)5	15	1266	1280	[GC]	--	Cellular Component: mitochondrion (GO:0005739);;	--	Sterol 3-beta-glucosyltransferase UGT80B1 OS=Arabidopsis thaliana GN=UGT80B1 PE=2 SV=1	PREDICTED: sterol 3-beta-glucosyltransferase-like [Vitis vinifera]
comp1181_c0	1	p2	(TC)9	18	197	214	[O]	Posttranslational modification, protein turnover, chaperones	Molecular Function: threonine-type endopeptidase activity (GO:0004298);; Cellular Component: nucleus (GO:0005634);; Cellular Component: vacuolar membrane (GO:0005774);; Cellular Component: cytosol (GO:0005829);; Cellular Component: plasma membrane (GO:0005886);; Biological Process: gluconeogenesis (GO:0006094);; Biological Process: glycolysis (GO:0006096);; Biological Process: water transport (GO…	K02727|1e-167|vvi:100251722|hypothetical protein LOC100251722	Proteasome subunit alpha type-3 OS=Oryza sativa subsp. japonica GN=PAG1 PE=2 SV=1	hypothetical protein PRUPE_ppa009201mg [Prunus persica]
comp1181_c0	2	p2	(TC)7	14	1231	1244	[O]	Posttranslational modification, protein turnover, chaperones	Molecular Function: threonine-type endopeptidase activity (GO:0004298);; Cellular Component: nucleus (GO:0005634);; Cellular Component: vacuolar membrane (GO:0005774);; Cellular Component: cytosol (GO:0005829);; Cellular Component: plasma membrane (GO:0005886);; Biological Process: gluconeogenesis (GO:0006094);; Biological Process: glycolysis (GO:0006096);; Biological Process: water transport (GO…	K02727|1e-167|vvi:100251722|hypothetical protein LOC100251722	Proteasome subunit alpha type-3 OS=Oryza sativa subsp. japonica GN=PAG1 PE=2 SV=1	hypothetical protein PRUPE_ppa009201mg [Prunus persica]
comp11816_c1	2	p3	(CTC)5	15	169	183	--	--	Cellular Component: mitochondrion (GO:0005739);;	--	Leucine-rich repeat extensin-like protein 5 OS=Arabidopsis thaliana GN=LRX5 PE=2 SV=2	predicted protein [Populus trichocarpa]
comp11816_c1	3	p3	(ACC)5	15	381	395	--	--	Cellular Component: mitochondrion (GO:0005739);;	--	Leucine-rich repeat extensin-like protein 5 OS=Arabidopsis thaliana GN=LRX5 PE=2 SV=2	predicted protein [Populus trichocarpa]
comp11816_c1	1	p4	(ATCT)5	20	1	20	--	--	Cellular Component: mitochondrion (GO:0005739);;	--	Leucine-rich repeat extensin-like protein 5 OS=Arabidopsis thaliana GN=LRX5 PE=2 SV=2	predicted protein [Populus trichocarpa]
comp11818_c0	1	p2	(TC)10	20	1	20	#N/A	#N/A	#N/A	#N/A	#N/A	#N/A
comp11818_c0	2	p2	(TC)7	14	189	202	#N/A	#N/A	#N/A	#N/A	#N/A	#N/A
comp11821_c0	1	p2	(GA)11	22	1	22	--	--	--	--	Zinc finger CCCH domain-containing protein 32 OS=Oryza sativa subsp. japonica GN=Os04g0671800 PE=2 SV=1	CCCH-type zinc finger family protein, putative [Theobroma cacao]
comp11823_c0	1	p2	(CT)10	20	1	20	[G]	Carbohydrate transport and metabolism	Molecular Function: beta-N-acetylhexosaminidase activity (GO:0004563);; Cellular Component: plasma membrane (GO:0005886);; Biological Process: carbohydrate metabolic process (GO:0005975);; Cellular Component: plant-type cell wall (GO:0009505);; Cellular Component: cytoplasmic membrane-bounded vesicle (GO:0016023);;	K12373|0.0|osa:4324914|Os01g0891000	Beta-hexosaminidase 3 OS=Arabidopsis thaliana GN=HEXO3 PE=1 SV=1	PREDICTED: beta-hexosaminidase 3-like [Setaria italica]
comp11824_c0	1	p2	(AG)8	16	68	83	--	--	--	--	Translation initiation factor IF-2 OS=Arthrobacter sp. (strain FB24) GN=infB PE=3 SV=1	Translation initiation factor IF-2, putative [Theobroma cacao]
comp11827_c0	1	p1	(T)13	13	477	489	--	--	--	--	--	PREDICTED: uncharacterized protein LOC100261483 [Vitis vinifera]
comp11835_c0	1	p3	(TTC)5	15	101	115	--	--	Cellular Component: plasma membrane (GO:0005886);; Cellular Component: chloroplast (GO:0009507);; Cellular Component: integral component of membrane (GO:0016021);;	--	CTL-like protein DDB_G0274487 OS=Dictyostelium discoideum GN=DDB_G0274487 PE=3 SV=1	PREDICTED: CTL-like protein DDB_G0274487 [Vitis vinifera]
comp11836_c0	1	p2	(TG)8	16	1690	1705	#N/A	#N/A	#N/A	#N/A	#N/A	#N/A
comp11843_c0	1	p2	(TC)7	14	2268	2281	--	--	Cellular Component: cytoplasm (GO:0005737);; Biological Process: lipid transport (GO:0006869);;	--	Kelch domain-containing protein 4 OS=Pongo abelii GN=KLHDC4 PE=2 SV=1	PREDICTED: kelch domain-containing protein 4 [Vitis vinifera]
comp11844_c0	1	p3	(GCC)6	18	2049	2066	[Q]	Secondary metabolites biosynthesis, transport and catabolism	Molecular Function: iron ion binding (GO:0005506);; Biological Process: protein targeting to membrane (GO:0006612);; Molecular Function: electron carrier activity (GO:0009055);; Biological Process: response to wounding (GO:0009611);; Biological Process: coumarin biosynthetic process (GO:0009805);; Biological Process: auxin polar transport (GO:0009926);; Biological Process: regulation of meristem …	--	Cytochrome P450 711A1 OS=Arabidopsis thaliana GN=CYP711A1 PE=2 SV=1	cytochrome P450, putative [Ricinus communis]
comp1185_c0	1	p3	(CCT)5	15	861	875	[J]	Translation, ribosomal structure and biogenesis	Molecular Function: RNA binding (GO:0003723);; Molecular Function: structural constituent of ribosome (GO:0003735);; Biological Process: translation (GO:0006412);; Cellular Component: chloroplast stroma (GO:0009570);; Cellular Component: chloroplast envelope (GO:0009941);; Cellular Component: membrane (GO:0016020);; Biological Process: isopentenyl diphosphate biosynthetic process, methylerythrito…	K02931|2e-91|osa:4331459|Os03g0125000	50S ribosomal protein L5, chloroplastic OS=Oryza sativa subsp. japonica GN=RPL5 PE=2 SV=2	PREDICTED: 50S ribosomal protein L5, chloroplastic-like [Solanum lycopersicum]
comp11850_c0	1	p2	(CT)7	14	378	391	--	--	--	--	--	hypothetical protein [Zea mays]
comp11851_c0	1	p3	(CCA)6	18	703	720	#N/A	#N/A	#N/A	#N/A	#N/A	#N/A
comp11853_c0	1	p2	(CT)9	18	3005	3022	--	--	Biological Process: nucleobase-containing compound metabolic process (GO:0006139);; Biological Process: lipid biosynthetic process (GO:0008610);; Biological Process: post-embryonic development (GO:0009791);; Biological Process: monocarboxylic acid metabolic process (GO:0032787);; Biological Process: cellular lipid metabolic process (GO:0044255);; Biological Process: single-organism developmental …	--	Homeobox protein ATH1 OS=Arabidopsis thaliana GN=ATH1 PE=1 SV=1	Homeobox gene 1, putative [Theobroma cacao]
comp11855_c0	1	p1	(T)11	11	1096	1106	--	--	Cellular Component: plastid (GO:0009536);; Biological Process: cellular component organization (GO:0016043);; Biological Process: single-organism cellular process (GO:0044763);;	--	--	PREDICTED: uncharacterized protein LOC101292723 [Fragaria vesca subsp. vesca]
comp11857_c0	1	p1	(T)11	11	1547	1557	[E]	Amino acid transport and metabolism	Molecular Function: nucleotide binding (GO:0000166);; Molecular Function: L-serine ammonia-lyase activity (GO:0003941);; Molecular Function: L-threonine ammonia-lyase activity (GO:0004794);; Biological Process: L-serine metabolic process (GO:0006563);; Molecular Function: D-serine ammonia-lyase activity (GO:0008721);; Molecular Function: pyridoxal phosphate binding (GO:0030170);; Molecular Functi…	K12235|1e-179|rcu:RCOM_1686380|Serine racemase, putative (EC:4.3.1.19)	Serine racemase OS=Oryza sativa subsp. japonica GN=SERR PE=1 SV=2	Serine racemase, putative [Ricinus communis]
comp11867_c0	1	p3	(TCC)5	15	350	364	--	--	--	--	E3 ubiquitin-protein ligase ICP0 OS=Human herpesvirus 2 (strain HG52) GN=RL2 PE=3 SV=1	hypothetical protein VITISV_037563 [Vitis vinifera]
comp1188_c0	1	p1	(A)13	13	1	13	--	--	Cellular Component: endosome (GO:0005768);; Cellular Component: Golgi apparatus (GO:0005794);; Cellular Component: trans-Golgi network (GO:0005802);; Biological Process: Golgi organization (GO:0007030);; Biological Process: protein secretion (GO:0009306);; Biological Process: unidimensional cell growth (GO:0009826);; Cellular Component: integral component of membrane (GO:0016021);;	--	Golgi apparatus membrane protein-like protein ECHIDNA OS=Arabidopsis thaliana GN=ECH PE=2 SV=1	Uncharacterized protein isoform 1 [Theobroma cacao]
comp11890_c0	1	p2	(CT)7	14	2015	2028	[F]	Nucleotide transport and metabolism	Biological Process: allantoin catabolic process (GO:0000256);; Molecular Function: allantoinase activity (GO:0004038);; Cellular Component: endoplasmic reticulum (GO:0005783);; Biological Process: cellular response to nitrogen starvation (GO:0006995);; Molecular Function: zinc ion binding (GO:0008270);; Biological Process: ureide catabolic process (GO:0010136);; Cellular Component: cytoplasmic me…	K01466|0.0|vvi:100248569|hypothetical protein LOC100248569	Allantoinase OS=Streptomyces avermitilis (strain ATCC 31267 / DSM 46492 / JCM 5070 / NCIMB 12804 / NRRL 8165 / MA-4680) GN=allB PE=3 SV=1	hypothetical protein PRUPE_ppa004531mg [Prunus persica]
comp11891_c0	1	p1	(T)10	10	29	38	--	--	Cellular Component: plastid (GO:0009536);; Cellular Component: integral component of membrane (GO:0016021);; Cellular Component: cytoplasmic membrane-bounded vesicle (GO:0016023);;	--	Protein SYM1 OS=Yarrowia lipolytica (strain CLIB 122 / E 150) GN=SYM1 PE=3 SV=1	Os03g0583800 [Oryza sativa Japonica Group]
comp119_c0	1	p2	(TC)7	14	47	60	[R]	General function prediction only	Cellular Component: endoplasmic reticulum lumen (GO:0005788);; Cellular Component: plasma membrane (GO:0005886);; Biological Process: metabolic process (GO:0008152);; Biological Process: response to wounding (GO:0009611);; Biological Process: regulation of systemic acquired resistance (GO:0010112);; Molecular Function: IAA-Ala conjugate hydrolase activity (GO:0010179);; Cellular Component: cytopl…	K14664|0.0|zma:100274316|hypothetical protein LOC100274316	IAA-amino acid hydrolase ILR1-like 1 OS=Oryza sativa subsp. japonica GN=ILL1 PE=2 SV=1	IAA hydrolase [Phalaenopsis hybrid cultivar]
comp119_c0	2	p2	(TC)7	14	172	185	[R]	General function prediction only	Cellular Component: endoplasmic reticulum lumen (GO:0005788);; Cellular Component: plasma membrane (GO:0005886);; Biological Process: metabolic process (GO:0008152);; Biological Process: response to wounding (GO:0009611);; Biological Process: regulation of systemic acquired resistance (GO:0010112);; Molecular Function: IAA-Ala conjugate hydrolase activity (GO:0010179);; Cellular Component: cytopl…	K14664|0.0|zma:100274316|hypothetical protein LOC100274316	IAA-amino acid hydrolase ILR1-like 1 OS=Oryza sativa subsp. japonica GN=ILL1 PE=2 SV=1	IAA hydrolase [Phalaenopsis hybrid cultivar]
comp1190_c0	1	p1	(A)10	10	119	128	--	--	Biological Process: mRNA export from nucleus (GO:0006406);; Biological Process: protein import into nucleus (GO:0006606);;	--	RRP12-like protein OS=Homo sapiens GN=RRP12 PE=1 SV=2	PREDICTED: RRP12-like protein-like [Vitis vinifera]
comp1190_c0	2	p2	(TC)6	12	2250	2261	--	--	Biological Process: mRNA export from nucleus (GO:0006406);; Biological Process: protein import into nucleus (GO:0006606);;	--	RRP12-like protein OS=Homo sapiens GN=RRP12 PE=1 SV=2	PREDICTED: RRP12-like protein-like [Vitis vinifera]
comp11902_c0	2	p1	(T)13	13	1831	1843	--	--	Cellular Component: Golgi apparatus (GO:0005794);; Cellular Component: chloroplast (GO:0009507);; Biological Process: virus induced gene silencing (GO:0009616);; Biological Process: vegetative phase change (GO:0010050);; Biological Process: production of ta-siRNAs involved in RNA interference (GO:0010267);; Molecular Function: transferase activity, transferring glycosyl groups (GO:0016757);; Biol…	--	Uncharacterized protein At1g04910 OS=Arabidopsis thaliana GN=At1g04910 PE=1 SV=1	conserved hypothetical protein [Ricinus communis]
comp11902_c0	1	p3	(AGC)6	18	63	80	--	--	Cellular Component: Golgi apparatus (GO:0005794);; Cellular Component: chloroplast (GO:0009507);; Biological Process: virus induced gene silencing (GO:0009616);; Biological Process: vegetative phase change (GO:0010050);; Biological Process: production of ta-siRNAs involved in RNA interference (GO:0010267);; Molecular Function: transferase activity, transferring glycosyl groups (GO:0016757);; Biol…	--	Uncharacterized protein At1g04910 OS=Arabidopsis thaliana GN=At1g04910 PE=1 SV=1	conserved hypothetical protein [Ricinus communis]
comp11904_c0	1	p1	(T)11	11	1413	1423	--	--	Cellular Component: nucleus (GO:0005634);; Molecular Function: carbohydrate binding (GO:0030246);;	--	F-box protein PP2-A15 OS=Arabidopsis thaliana GN=PP2A15 PE=2 SV=1	hypothetical protein PRUPE_ppa009334mg [Prunus persica]
comp11912_c0	1	p2	(AG)9	18	1199	1216	--	--	Biological Process: polysaccharide biosynthetic process (GO:0000271);; Biological Process: amino acid transmembrane transport (GO:0003333);; Cellular Component: plasma membrane (GO:0005886);; Biological Process: acetyl-CoA metabolic process (GO:0006084);; Biological Process: auxin-activated signaling pathway (GO:0009734);; Biological Process: multidimensional cell growth (GO:0009825);; Biological…	K13946|0.0|vvi:100243769|hypothetical protein LOC100243769	Auxin transporter-like protein 3 OS=Medicago truncatula GN=LAX3 PE=2 SV=1	hypothetical protein TCM_035054 [Theobroma cacao]
comp11915_c0	1	p1	(T)14	14	1037	1050	[J]	Translation, ribosomal structure and biogenesis	Molecular Function: translation release factor activity (GO:0003747);; Cellular Component: mitochondrion (GO:0005739);; Biological Process: translational termination (GO:0006415);;	--	Peptide chain release factor 1 OS=Leptothrix cholodnii (strain ATCC 51168 / LMG 8142 / SP-6) GN=prfA PE=3 SV=1	PREDICTED: peptide chain release factor 1-like [Vitis vinifera]
comp11915_c0	2	p3	(GCC)6	18	2595	2612	[J]	Translation, ribosomal structure and biogenesis	Molecular Function: translation release factor activity (GO:0003747);; Cellular Component: mitochondrion (GO:0005739);; Biological Process: translational termination (GO:0006415);;	--	Peptide chain release factor 1 OS=Leptothrix cholodnii (strain ATCC 51168 / LMG 8142 / SP-6) GN=prfA PE=3 SV=1	PREDICTED: peptide chain release factor 1-like [Vitis vinifera]
comp11916_c0	3	c	(T)10---(AG)9	96	1643	1738	#N/A	#N/A	#N/A	#N/A	#N/A	#N/A
comp11916_c0	1	p1	(T)13	13	305	317	#N/A	#N/A	#N/A	#N/A	#N/A	#N/A
comp11916_c0	2	p1	(A)11	11	1139	1149	#N/A	#N/A	#N/A	#N/A	#N/A	#N/A
comp11917_c0	1	p3	(CTT)5	15	1598	1612	[R]	General function prediction only	Biological Process: multicellular organismal development (GO:0007275);; Biological Process: reproductive process (GO:0022414);; Biological Process: anatomical structure development (GO:0048856);;	--	U3 small nucleolar RNA-interacting protein 2 OS=Mus musculus GN=Rrp9 PE=1 SV=1	hypothetical protein PRUPE_ppa004203mg [Prunus persica]
comp11920_c0	1	p2	(AG)7	14	92	105	--	--	Molecular Function: iron ion binding (GO:0005506);; Biological Process: pentose-phosphate shunt (GO:0006098);; Biological Process: aromatic amino acid family biosynthetic process (GO:0009073);; Cellular Component: chloroplast stroma (GO:0009570);; Biological Process: iron-sulfur cluster assembly (GO:0016226);; Biological Process: positive regulation of transcription, DNA-templated (GO:0045893);; …	--	--	predicted protein [Hordeum vulgare subsp. vulgare]
comp11924_c0	1	p3	(ACC)7	21	1	21	[HC]	--	Cellular Component: mitochondrion (GO:0005739);; Cellular Component: chloroplast (GO:0009507);; Molecular Function: zeaxanthin epoxidase [overall] activity (GO:0009540);; Molecular Function: zeaxanthin epoxidase activity (GO:0052662);; Molecular Function: antheraxanthin epoxidase activity (GO:0052663);; Biological Process: oxidation-reduction process (GO:0055114);;	--	Zeaxanthin epoxidase, chloroplastic OS=Nicotiana plumbaginifolia GN=ABA2 PE=1 SV=1	PREDICTED: zeaxanthin epoxidase, chloroplastic-like [Vitis vinifera]
comp11924_c1	1	p3	(ACC)5	15	351	365	--	--	--	--	Protein FAM117B OS=Mus musculus GN=Fam117b PE=1 SV=1	PREDICTED: activating signal cointegrator 1 complex subunit 2 homolog [Cicer arietinum]
comp11924_c2	1	p3	(TGT)5	15	132	146	#N/A	#N/A	#N/A	#N/A	#N/A	#N/A
comp11925_c0	1	p2	(TA)9	18	2074	2091	[J]	Translation, ribosomal structure and biogenesis	Cellular Component: plastid (GO:0009536);;	--	Putative methyltransferase NSUN5 OS=Mus musculus GN=Nsun5 PE=2 SV=2	PREDICTED: putative methyltransferase NSUN5-like [Vitis vinifera]
comp11930_c0	1	p3	(CGC)5	15	386	400	--	--	Molecular Function: phospholipase activity (GO:0004620);; Cellular Component: plasma membrane (GO:0005886);; Biological Process: phospholipid metabolic process (GO:0006644);; Biological Process: galactolipid metabolic process (GO:0019374);; Molecular Function: acyl-CoA hydrolase activity (GO:0047617);; Biological Process: response to other organism (GO:0051707);;	--	Alanine and proline-rich secreted protein Apa OS=Mycobacterium avium GN=apa PE=3 SV=1	unnamed protein product [Vitis vinifera]
comp11934_c0	1	p2	(GA)8	16	389	404	#N/A	#N/A	#N/A	#N/A	#N/A	#N/A
comp11935_c0	1	p1	(T)10	10	509	518	#N/A	#N/A	#N/A	#N/A	#N/A	#N/A
comp11939_c0	1	p1	(A)12	12	1194	1205	#N/A	#N/A	#N/A	#N/A	#N/A	#N/A
comp11946_c0	1	p1	(T)10	10	452	461	--	--	Biological Process: response to molecule of bacterial origin (GO:0002237);; Molecular Function: ubiquitin-protein ligase activity (GO:0004842);; Biological Process: response to insect (GO:0009625);; Biological Process: shade avoidance (GO:0009641);; Biological Process: jasmonic acid and ethylene-dependent systemic resistance (GO:0009861);; Biological Process: jasmonic acid mediated signaling path…	K13463|0.0|vvi:100254771|hypothetical protein LOC100254771	Coronatine-insensitive protein 1 OS=Arabidopsis thaliana GN=COI1 PE=1 SV=1	RNI-like superfamily protein [Theobroma cacao]
comp11946_c0	3	p2	(AG)9	18	2373	2390	--	--	Biological Process: response to molecule of bacterial origin (GO:0002237);; Molecular Function: ubiquitin-protein ligase activity (GO:0004842);; Biological Process: response to insect (GO:0009625);; Biological Process: shade avoidance (GO:0009641);; Biological Process: jasmonic acid and ethylene-dependent systemic resistance (GO:0009861);; Biological Process: jasmonic acid mediated signaling path…	K13463|0.0|vvi:100254771|hypothetical protein LOC100254771	Coronatine-insensitive protein 1 OS=Arabidopsis thaliana GN=COI1 PE=1 SV=1	RNI-like superfamily protein [Theobroma cacao]
comp11946_c0	2	p3	(TGG)6	18	566	583	--	--	Biological Process: response to molecule of bacterial origin (GO:0002237);; Molecular Function: ubiquitin-protein ligase activity (GO:0004842);; Biological Process: response to insect (GO:0009625);; Biological Process: shade avoidance (GO:0009641);; Biological Process: jasmonic acid and ethylene-dependent systemic resistance (GO:0009861);; Biological Process: jasmonic acid mediated signaling path…	K13463|0.0|vvi:100254771|hypothetical protein LOC100254771	Coronatine-insensitive protein 1 OS=Arabidopsis thaliana GN=COI1 PE=1 SV=1	RNI-like superfamily protein [Theobroma cacao]
comp11949_c0	1	p1	(A)10	10	79	88	[T]	Signal transduction mechanisms	Molecular Function: protein serine/threonine phosphatase activity (GO:0004722);; Cellular Component: cytoplasm (GO:0005737);; Biological Process: metabolic process (GO:0008152);;	--	Probable protein phosphatase 2C 67 OS=Oryza sativa subsp. japonica GN=Os09g0314400 PE=2 SV=1	PREDICTED: probable protein phosphatase 2C 8 [Vitis vinifera]
comp11954_c0	1	p2	(TC)9	18	1	18	--	--	--	--	Vegetative cell wall protein gp1 OS=Chlamydomonas reinhardtii GN=GP1 PE=2 SV=1	unnamed protein product [Vitis vinifera]
comp11961_c0	1	p1	(T)17	17	1	17	#N/A	#N/A	#N/A	#N/A	#N/A	#N/A
comp11962_c0	1	p2	(CT)8	16	2802	2817	[RTKL]	--	Molecular Function: nucleotide binding (GO:0000166);; Molecular Function: protein serine/threonine kinase activity (GO:0004674);; Cellular Component: plasma membrane (GO:0005886);; Biological Process: plant-type cell wall organization (GO:0009664);; Biological Process: leaf morphogenesis (GO:0009965);; Biological Process: protoderm histogenesis (GO:0010068);; Biological Process: cuticle developme…	--	Receptor-like serine/threonine-protein kinase ALE2 OS=Arabidopsis thaliana GN=ALE2 PE=1 SV=1	PREDICTED: receptor-like serine/threonine-protein kinase ALE2-like [Vitis vinifera]
comp11962_c0	2	p2	(AG)7	14	3734	3747	[RTKL]	--	Molecular Function: nucleotide binding (GO:0000166);; Molecular Function: protein serine/threonine kinase activity (GO:0004674);; Cellular Component: plasma membrane (GO:0005886);; Biological Process: plant-type cell wall organization (GO:0009664);; Biological Process: leaf morphogenesis (GO:0009965);; Biological Process: protoderm histogenesis (GO:0010068);; Biological Process: cuticle developme…	--	Receptor-like serine/threonine-protein kinase ALE2 OS=Arabidopsis thaliana GN=ALE2 PE=1 SV=1	PREDICTED: receptor-like serine/threonine-protein kinase ALE2-like [Vitis vinifera]
comp11972_c0	1	p1	(G)10	10	1833	1842	#N/A	#N/A	#N/A	#N/A	#N/A	#N/A
comp11972_c0	2	p2	(CT)9	18	2170	2187	#N/A	#N/A	#N/A	#N/A	#N/A	#N/A
comp11975_c0	1	p2	(CT)10	20	1469	1488	--	--	Molecular Function: sequence-specific DNA binding transcription factor activity (GO:0003700);; Cellular Component: nucleus (GO:0005634);; Biological Process: regulation of transcription, DNA-templated (GO:0006355);; Biological Process: cell adhesion (GO:0007155);; Molecular Function: lipid binding (GO:0008289);; Biological Process: determination of bilateral symmetry (GO:0009855);; Biological Pro…	--	Homeobox-leucine zipper protein HOX9 OS=Oryza sativa subsp. japonica GN=HOX9 PE=2 SV=1	homeobox-leucine zipper protein REVOLUTA-like isoform 2, partial [Caragana korshinskii]
comp11976_c0	1	p1	(T)10	10	535	544	#N/A	#N/A	#N/A	#N/A	#N/A	#N/A
comp11976_c0	2	p1	(T)14	14	1345	1358	#N/A	#N/A	#N/A	#N/A	#N/A	#N/A
comp11977_c0	1	p3	(CGG)7	21	1	21	--	--	Biological Process: red or far-red light signaling pathway (GO:0010017);; Biological Process: organic substance biosynthetic process (GO:1901576);;	--	F-box/kelch-repeat protein At1g30090 OS=Arabidopsis thaliana GN=At1g30090 PE=2 SV=1	PREDICTED: F-box protein AFR [Vitis vinifera]
comp11978_c0	1	c	(T)10(AAAAG)5	35	26	60	--	--	Cellular Component: mitochondrion (GO:0005739);;	--	Proline-rich receptor-like protein kinase PERK13 OS=Arabidopsis thaliana GN=PERK13 PE=2 SV=1	Uncharacterized protein TCM_005902 [Theobroma cacao]
comp11979_c0	1	p1	(T)12	12	72	83	--	--	--	--	--	hypothetical protein PRUPE_ppa001286mg [Prunus persica]
comp1198_c0	1	c	(GCTC)5gt(TC)11	44	1063	1106	[C]	Energy production and conversion	Biological Process: MAPK cascade (GO:0000165);; Molecular Function: protein binding (GO:0005515);; Cellular Component: plasma membrane (GO:0005886);; Biological Process: pentose-phosphate shunt (GO:0006098);; Biological Process: rRNA processing (GO:0006364);; Biological Process: protein targeting to membrane (GO:0006612);; Molecular Function: ubiquinol-cytochrome-c reductase activity (GO:0008121)…	K02636|1e-127|vvi:100258879|hypothetical protein LOC100258879	Cytochrome b6-f complex iron-sulfur subunit, chloroplastic OS=Fritillaria agrestis GN=petC PE=2 SV=1	Rieske iron-sulphur protein precursor [Zantedeschia aethiopica]
comp11983_c0	1	p2	(AG)8	16	541	556	--	--	Cellular Component: mitochondrion (GO:0005739);;	--	--	PLATZ transcription factor family protein isoform 3, partial [Theobroma cacao]
comp11984_c0	1	p1	(A)11	11	826	836	--	--	Cellular Component: mitochondrion (GO:0005739);; Biological Process: regulation of cell cycle (GO:0051726);;	--	Cyclin-J18-like OS=Oryza sativa subsp. japonica GN=Os03g0237900 PE=2 SV=2	unnamed protein product [Vitis vinifera]
comp11985_c1	1	p2	(AT)10	20	188	207	--	--	--	--	Verprolin OS=Saccharomyces cerevisiae (strain ATCC 204508 / S288c) GN=VRP1 PE=1 SV=2	unnamed protein product [Blastocystis hominis]
comp11986_c0	1	p2	(CT)8	16	415	430	#N/A	#N/A	#N/A	#N/A	#N/A	#N/A
comp11995_c0	1	p1	(A)11	11	1	11	--	--	Cellular Component: plastid (GO:0009536);;	--	--	Os01g0738000 [Oryza sativa Japonica Group]
comp12_c0	1	p2	(AT)8	16	265	280	--	--	Cellular Component: cell part (GO:0044464);;	--	Defensin-like protein 5 OS=Arabidopsis thaliana GN=PDF2.4 PE=3 SV=2	defensin protein precursor [Capsicum annuum]
comp12010_c0	1	p1	(A)17	17	24	40	--	--	--	--	--	ACR8 [Zea mays]
comp12011_c0	2	p1	(T)11	11	199	209	#N/A	#N/A	#N/A	#N/A	#N/A	#N/A
comp12011_c0	1	p2	(GA)10	20	1	20	#N/A	#N/A	#N/A	#N/A	#N/A	#N/A
comp1202_c0	2	c	(AAG)5---(AG)8	39	3831	3869	--	--	Molecular Function: peroxidase activity (GO:0004601);;	--	Transcription factor bHLH71 OS=Arabidopsis thaliana GN=BHLH71 PE=1 SV=1	C2 calcium/lipid-binding plant phosphoribosyltransferase family protein [Theobroma cacao]
comp1202_c0	1	p2	(AG)8	16	3577	3592	--	--	Molecular Function: peroxidase activity (GO:0004601);;	--	Transcription factor bHLH71 OS=Arabidopsis thaliana GN=BHLH71 PE=1 SV=1	C2 calcium/lipid-binding plant phosphoribosyltransferase family protein [Theobroma cacao]
comp12028_c0	1	p1	(A)10	10	1181	1190	--	--	Cellular Component: plasma membrane (GO:0005886);; Molecular Function: organic anion transmembrane transporter activity (GO:0008514);; Biological Process: plant-type cell wall biogenesis (GO:0009832);; Biological Process: organic anion transport (GO:0015711);; Cellular Component: integral component of membrane (GO:0016021);; Biological Process: cell growth (GO:0016049);; Biological Process: cellu…	--	Probable sugar phosphate/phosphate translocator At1g12500 OS=Arabidopsis thaliana GN=At1g12500 PE=2 SV=1	PREDICTED: probable sugar phosphate/phosphate translocator At1g12500 isoform 1 [Vitis vinifera]
comp12035_c0	1	p2	(AG)8	16	3623	3638	--	--	--	--	--	PREDICTED: uncharacterized protein LOC100245981 [Vitis vinifera]
comp12036_c0	1	p2	(CT)7	14	26	39	[O]	Posttranslational modification, protein turnover, chaperones	Cellular Component: mitochondrion (GO:0005739);; Cellular Component: plastid (GO:0009536);;	--	Chaperone protein dnaJ 11, chloroplastic OS=Arabidopsis thaliana GN=ATJ11 PE=1 SV=2	Chaperone DnaJ-domain superfamily protein, putative [Theobroma cacao]
comp12037_c0	1	p2	(CT)9	18	5	22	#N/A	#N/A	#N/A	#N/A	#N/A	#N/A
comp12047_c0	1	p2	(AG)9	18	466	483	#N/A	#N/A	#N/A	#N/A	#N/A	#N/A
comp12049_c0	1	p2	(TC)8	16	223	238	[S]	Function unknown	Cellular Component: chloroplast (GO:0009507);; Cellular Component: membrane (GO:0016020);; Biological Process: carotene biosynthetic process (GO:0016120);; Molecular Function: 9,15,9'-tri-cis-zeta-carotene isomerase activity (GO:0090471);;	--	15-cis-zeta-carotene isomerase, chloroplastic OS=Zea mays PE=1 SV=1	PREDICTED: uncharacterized protein LOC100842276 [Brachypodium distachyon]
comp12059_c0	1	c	(C)10---(TTC)6	56	489	544	--	--	Molecular Function: DNA binding (GO:0003677);; Biological Process: regulation of transcription, DNA-templated (GO:0006355);;	--	NAC domain-containing protein 74 OS=Oryza sativa subsp. japonica GN=NAC74 PE=2 SV=1	transcription factor, putative [Ricinus communis]
comp12064_c0	1	p1	(T)13	13	355	367	#N/A	#N/A	#N/A	#N/A	#N/A	#N/A
comp1207_c0	1	p1	(A)13	13	35	47	[V]	Defense mechanisms	Molecular Function: ATP binding (GO:0005524);; Biological Process: ATP catabolic process (GO:0006200);; Cellular Component: membrane (GO:0016020);; Molecular Function: ATPase activity (GO:0016887);;	--	Pleiotropic drug resistance protein 2 OS=Nicotiana plumbaginifolia GN=PDR2 PE=2 SV=1	PREDICTED: pleiotropic drug resistance protein 2 [Vitis vinifera]
comp12070_c0	1	p2	(AG)8	16	2045	2060	[T]	Signal transduction mechanisms	Molecular Function: protein serine/threonine phosphatase activity (GO:0004722);; Cellular Component: nucleus (GO:0005634);; Cellular Component: mitochondrion (GO:0005739);; Biological Process: protein dephosphorylation (GO:0006470);; Cellular Component: protein serine/threonine phosphatase complex (GO:0008287);; Cellular Component: plastid (GO:0009536);; Biological Process: response to chitin (GO…	--	Probable protein phosphatase 2C 27 OS=Arabidopsis thaliana GN=At2g33700 PE=2 SV=1	Phosphatase 2C family protein isoform 1 [Theobroma cacao]
comp12071_c0	1	p2	(AG)11	22	1	22	#N/A	#N/A	#N/A	#N/A	#N/A	#N/A
comp12074_c0	1	p2	(GA)8	16	684	699	#N/A	#N/A	#N/A	#N/A	#N/A	#N/A
comp12080_c0	1	p1	(A)10	10	2259	2268	[RTKL]	--	Molecular Function: transferase activity, transferring phosphorus-containing groups (GO:0016772);;	--	Probable serine/threonine-protein kinase WNK1 OS=Oryza sativa subsp. japonica GN=WNK1 PE=2 SV=1	hypothetical protein PRUPE_ppa001963mg [Prunus persica]
comp12091_c0	1	p1	(A)10	10	38	47	--	--	Molecular Function: binding (GO:0005488);; Molecular Function: oxidoreductase activity (GO:0016491);;	--	Cytochrome P450 93A2 OS=Glycine max GN=CYP93A2 PE=2 SV=1	PREDICTED: cytochrome P450 93A1-like [Brachypodium distachyon]
comp12097_c0	1	p1	(T)12	12	1577	1588	#N/A	#N/A	#N/A	#N/A	#N/A	#N/A
comp1210_c0	1	p2	(AG)7	14	1254	1267	[C]	Energy production and conversion	Molecular Function: retinal dehydrogenase activity (GO:0001758);; Biological Process: phenylpropanoid biosynthetic process (GO:0009699);; Molecular Function: coniferyl-aldehyde dehydrogenase activity (GO:0050269);; Biological Process: oxidation-reduction process (GO:0055114);;	K12355|0.0|osa:4326375|Os01g0591000	Aldehyde dehydrogenase family 2 member C4 OS=Arabidopsis thaliana GN=ALDH2C4 PE=1 SV=2	PREDICTED: aldehyde dehydrogenase family 2 member C4-like [Brachypodium distachyon]
comp12102_c0	1	p1	(T)12	12	2254	2265	--	--	Molecular Function: poly(ADP-ribose) glycohydrolase activity (GO:0004649);; Biological Process: response to osmotic stress (GO:0006970);; Biological Process: response to oxidative stress (GO:0006979);; Biological Process: response to water deprivation (GO:0009414);; Biological Process: defense response to fungus (GO:0050832);; Biological Process: stomatal closure (GO:0090332);;	K07759|0.0|vvi:100249056|hypothetical protein LOC100249056	Poly(ADP-ribose) glycohydrolase 1 OS=Arabidopsis thaliana GN=PARG1 PE=1 SV=2	PREDICTED: poly(ADP-ribose) glycohydrolase 1 [Vitis vinifera]
comp12103_c0	1	p2	(AG)6	12	1	12	--	--	Biological Process: phosphate-containing compound metabolic process (GO:0006796);; Biological Process: response to endogenous stimulus (GO:0009719);; Biological Process: response to organic substance (GO:0010033);; Molecular Function: phosphatase activity (GO:0016791);; Biological Process: intracellular signal transduction (GO:0035556);; Biological Process: response to oxygen-containing compound …	--	Probable tyrosine-protein phosphatase At1g05000 OS=Arabidopsis thaliana GN=At1g05000 PE=1 SV=1	hypothetical protein OsI_38124 [Oryza sativa Indica Group]
comp12111_c0	1	p3	(AAG)7	21	1	21	[DZ]	--	Molecular Function: binding (GO:0005488);;	--	Ultraviolet-B receptor UVR8 OS=Arabidopsis thaliana GN=UVR8 PE=1 SV=1	PREDICTED: E3 ubiquitin-protein ligase HERC2-like [Vitis vinifera]
comp12115_c0	1	p3	(CCT)5	15	44	58	[J]	Translation, ribosomal structure and biogenesis	Cellular Component: cytoplasm (GO:0005737);;	--	Diphthamide biosynthesis protein 1 OS=Bos taurus GN=DPH1 PE=2 SV=1	PREDICTED: diphthamide biosynthesis protein 1-like [Brachypodium distachyon]
comp12115_c0	2	p3	(GAA)5	15	1297	1311	[J]	Translation, ribosomal structure and biogenesis	Cellular Component: cytoplasm (GO:0005737);;	--	Diphthamide biosynthesis protein 1 OS=Bos taurus GN=DPH1 PE=2 SV=1	PREDICTED: diphthamide biosynthesis protein 1-like [Brachypodium distachyon]
comp12119_c0	1	p2	(TA)8	16	87	102	--	--	Cellular Component: intracellular membrane-bounded organelle (GO:0043231);; Cellular Component: cytoplasmic part (GO:0044444);;	--	Uncharacterized protein At1g04910 OS=Arabidopsis thaliana GN=At1g04910 PE=1 SV=1	O-fucosyltransferase family protein [Theobroma cacao]
comp12122_c0	1	p3	(TCT)5	15	864	878	--	--	Molecular Function: ion binding (GO:0043167);;	--	RING-H2 finger protein ATL46 OS=Arabidopsis thaliana GN=ATL46 PE=2 SV=1	PREDICTED: RING-H2 finger protein ATL46-like [Vitis vinifera]
comp12122_c0	2	p3	(AGC)5	15	1569	1583	--	--	Molecular Function: ion binding (GO:0043167);;	--	RING-H2 finger protein ATL46 OS=Arabidopsis thaliana GN=ATL46 PE=2 SV=1	PREDICTED: RING-H2 finger protein ATL46-like [Vitis vinifera]
comp12124_c0	1	p2	(CT)6	12	50	61	--	--	--	--	WPP domain-associated protein (Fragment) OS=Solanum lycopersicum GN=WAP PE=1 SV=1	PREDICTED: WPP domain-associated protein-like [Vitis vinifera]
comp12127_c0	2	p2	(CT)9	18	1077	1094	[RTKL]	--	Molecular Function: calmodulin-dependent protein kinase activity (GO:0004683);; Molecular Function: calcium-dependent protein kinase C activity (GO:0004698);; Molecular Function: calcium ion binding (GO:0005509);; Molecular Function: ATP binding (GO:0005524);; Cellular Component: nucleus (GO:0005634);; Cellular Component: cytoplasm (GO:0005737);; Cellular Component: plasma membrane (GO:0005886);;…	K13412|2e-96|zma:100285166|calcium-dependent protein kinase, isoform AK1	Calcium-dependent protein kinase 7 OS=Arabidopsis thaliana GN=CPK7 PE=1 SV=1	TPA: putative calcium-dependent protein kinase family protein, partial [Zea mays]
comp12127_c0	1	p3	(AGA)5	15	936	950	[RTKL]	--	Molecular Function: calmodulin-dependent protein kinase activity (GO:0004683);; Molecular Function: calcium-dependent protein kinase C activity (GO:0004698);; Molecular Function: calcium ion binding (GO:0005509);; Molecular Function: ATP binding (GO:0005524);; Cellular Component: nucleus (GO:0005634);; Cellular Component: cytoplasm (GO:0005737);; Cellular Component: plasma membrane (GO:0005886);;…	K13412|2e-96|zma:100285166|calcium-dependent protein kinase, isoform AK1	Calcium-dependent protein kinase 7 OS=Arabidopsis thaliana GN=CPK7 PE=1 SV=1	TPA: putative calcium-dependent protein kinase family protein, partial [Zea mays]
comp12128_c0	1	p3	(GCC)5	15	370	384	--	--	Cellular Component: mitochondrion (GO:0005739);; Biological Process: auxin polar transport (GO:0009926);; Cellular Component: chloroplast envelope (GO:0009941);; Biological Process: response to UV-B (GO:0010224);;	--	UPF0420 protein OS=Dictyostelium discoideum GN=DDB_G0277179 PE=3 SV=1	predicted protein [Populus trichocarpa]
comp12129_c0	1	p1	(A)10	10	896	905	--	--	Molecular Function: actin binding (GO:0003779);; Biological Process: fatty acid catabolic process (GO:0009062);; Cellular Component: actin cytoskeleton (GO:0015629);; Biological Process: actin cytoskeleton organization (GO:0030036);;	--	--	predicted protein [Hordeum vulgare subsp. vulgare]
comp12134_c0	1	p3	(GCG)6	18	833	850	[Q]	Secondary metabolites biosynthesis, transport and catabolism	Molecular Function: binding (GO:0005488);; Biological Process: cellular process (GO:0009987);; Cellular Component: membrane (GO:0016020);; Molecular Function: oxidoreductase activity (GO:0016491);; Cellular Component: intracellular membrane-bounded organelle (GO:0043231);; Cellular Component: cytoplasmic part (GO:0044444);; Biological Process: single-organism metabolic process (GO:0044710);; Biol…	--	Cytochrome P450 71A1 OS=Persea americana GN=CYP71A1 PE=1 SV=2	PREDICTED: cytochrome P450 83B1-like [Vitis vinifera]
comp12135_c0	1	p3	(ATG)7	21	54	74	#N/A	#N/A	#N/A	#N/A	#N/A	#N/A
comp12137_c0	1	p1	(A)12	12	1438	1449	--	--	Cellular Component: cytoplasmic membrane-bounded vesicle (GO:0016023);; Biological Process: L-arabinose metabolic process (GO:0046373);; Molecular Function: alpha-N-arabinofuranosidase activity (GO:0046556);;	K09955|7e-11|zma:100279496|cl31389_1	--	uncharacterized protein LOC100279496 precursor [Zea mays]
comp12138_c0	1	p2	(TC)6	12	788	799	--	--	--	--	Uncharacterized gene 1 protein OS=Gallid herpesvirus 2 (strain Chicken/Md5/ATCC VR-987) GN=MDV001 PE=4 SV=1	PREDICTED: uncharacterized protein LOC100821820 [Brachypodium distachyon]
comp12140_c0	1	p2	(CT)9	18	1	18	--	--	--	--	--	predicted protein [Hordeum vulgare subsp. vulgare]
comp12151_c0	1	p1	(T)18	18	1505	1522	--	--	--	--	Autophagy-related protein 18b OS=Arabidopsis thaliana GN=ATG18B PE=2 SV=2	RecName: Full=Autophagy-related protein 18b; Short=AtATG18b
comp12156_c0	2	c	(GAA)5---(GCC)6	104	638	741	--	--	--	--	Serine/arginine-rich splicing factor 4 OS=Homo sapiens GN=SRSF4 PE=1 SV=2	hypothetical protein [Podospora anserina S mat+]
comp12156_c0	1	p3	(CCT)5	15	240	254	--	--	--	--	Serine/arginine-rich splicing factor 4 OS=Homo sapiens GN=SRSF4 PE=1 SV=2	hypothetical protein [Podospora anserina S mat+]
comp12157_c0	1	p2	(GA)6	12	1636	1647	[GER]	--	Cellular Component: membrane (GO:0016020);; Biological Process: sterol biosynthetic process (GO:0016126);; Biological Process: sphingoid biosynthetic process (GO:0046520);;	--	Solute carrier family 35 member G2 OS=Rattus norvegicus GN=Slc35g2 PE=2 SV=1	PREDICTED: uncharacterized protein LOC100256852 [Vitis vinifera]
comp12161_c0	1	p1	(T)17	17	1	17	[R]	General function prediction only	Molecular Function: nucleotide binding (GO:0000166);; Cellular Component: nucleus (GO:0005634);; Biological Process: anthocyanin-containing compound biosynthetic process (GO:0009718);; Biological Process: entrainment of circadian clock by photoperiod (GO:0043153);; Molecular Function: transcription regulatory region DNA binding (GO:0044212);; Biological Process: photoperiodism, flowering (GO:0048…	K11805|0.0|pop:POPTR_572829|hypothetical protein	WD repeat-containing protein LWD1 OS=Arabidopsis thaliana GN=LWD1 PE=2 SV=1	PREDICTED: WD repeat-containing protein LWD1-like [Cicer arietinum]
comp12161_c0	2	p3	(CGT)5	15	838	852	[R]	General function prediction only	Molecular Function: nucleotide binding (GO:0000166);; Cellular Component: nucleus (GO:0005634);; Biological Process: anthocyanin-containing compound biosynthetic process (GO:0009718);; Biological Process: entrainment of circadian clock by photoperiod (GO:0043153);; Molecular Function: transcription regulatory region DNA binding (GO:0044212);; Biological Process: photoperiodism, flowering (GO:0048…	K11805|0.0|pop:POPTR_572829|hypothetical protein	WD repeat-containing protein LWD1 OS=Arabidopsis thaliana GN=LWD1 PE=2 SV=1	PREDICTED: WD repeat-containing protein LWD1-like [Cicer arietinum]
comp12162_c0	1	p3	(CAC)6	18	78	95	--	--	Biological Process: RNA splicing, via endonucleolytic cleavage and ligation (GO:0000394);; Biological Process: nuclear-transcribed mRNA catabolic process (GO:0000956);; Molecular Function: DNA binding (GO:0003677);; Molecular Function: sequence-specific DNA binding transcription factor activity (GO:0003700);; Molecular Function: calmodulin binding (GO:0005516);; Cellular Component: nucleus (GO:00…	--	Protein CUP-SHAPED COTYLEDON 2 OS=Arabidopsis thaliana GN=NAC098 PE=1 SV=1	NAC domain protein, IPR003441 [Populus trichocarpa]
comp12164_c0	1	p1	(A)12	12	294	305	[Z]	Cytoskeleton	Molecular Function: microtubule motor activity (GO:0003777);; Molecular Function: ATP binding (GO:0005524);; Cellular Component: kinesin complex (GO:0005871);; Cellular Component: microtubule (GO:0005874);; Biological Process: microtubule-based movement (GO:0007018);; Molecular Function: microtubule binding (GO:0008017);;	K10401|0.0|rcu:RCOM_0188570|Chromosome-associated kinesin KIF4A, putative	Kinesin-like protein KIF19 OS=Homo sapiens GN=KIF19 PE=2 SV=2	PREDICTED: kinesin-like protein KIF19-like [Vitis vinifera]
comp12165_c0	1	p3	(ACC)5	15	145	159	--	--	Cellular Component: vacuolar membrane (GO:0005774);; Cellular Component: plant-type cell wall (GO:0009505);; Cellular Component: cytoplasmic membrane-bounded vesicle (GO:0016023);; Biological Process: methylglyoxal catabolic process to D-lactate (GO:0019243);;	--	Mucin-2 OS=Homo sapiens GN=MUC2 PE=1 SV=2	PREDICTED: uncharacterized protein LOC100267814 isoform 1 [Vitis vinifera]
comp12175_c0	1	p2	(GA)8	16	2980	2995	[M]	Cell wall/membrane/envelope biogenesis	Cellular Component: mitochondrion (GO:0005739);; Molecular Function: lipid-A-disaccharide synthase activity (GO:0008915);; Biological Process: lipid A biosynthetic process (GO:0009245);;	K00748|3e-62|sbi:SORBI_03g034785|hypothetical protein	Probable lipid-A-disaccharide synthase, mitochondrial OS=Arabidopsis thaliana GN=LPXB PE=2 SV=1	hypothetical protein PRUPE_ppa026476mg, partial [Prunus persica]
comp12179_c0	1	p1	(T)10	10	1183	1192	[J]	Translation, ribosomal structure and biogenesis	Molecular Function: structural constituent of ribosome (GO:0003735);; Cellular Component: mitochondrion (GO:0005739);; Cellular Component: ribosome (GO:0005840);; Biological Process: translation (GO:0006412);; Biological Process: heme biosynthetic process (GO:0006783);; Molecular Function: 5S rRNA binding (GO:0008097);; Molecular Function: zinc ion binding (GO:0008270);; Cellular Component: chlor…	--	50S ribosomal protein L25 OS=Azorhizobium caulinodans (strain ATCC 43989 / DSM 5975 / ORS 571) GN=rplY PE=3 SV=1	PREDICTED: 50S ribosomal protein L25-like [Cucumis sativus]
comp12180_c0	2	p1	(A)14	14	1863	1876	--	--	Cellular Component: mitochondrion (GO:0005739);; Biological Process: RNA modification (GO:0009451);;	--	Pentatricopeptide repeat-containing protein At2g03880, mitochondrial OS=Arabidopsis thaliana GN=PCMP-H44 PE=2 SV=1	PREDICTED: pentatricopeptide repeat-containing protein At2g03880, mitochondrial [Vitis vinifera]
comp12180_c0	1	p2	(TA)11	22	1	22	--	--	Cellular Component: mitochondrion (GO:0005739);; Biological Process: RNA modification (GO:0009451);;	--	Pentatricopeptide repeat-containing protein At2g03880, mitochondrial OS=Arabidopsis thaliana GN=PCMP-H44 PE=2 SV=1	PREDICTED: pentatricopeptide repeat-containing protein At2g03880, mitochondrial [Vitis vinifera]
comp12186_c0	1	p2	(AG)10	20	1705	1724	[R]	General function prediction only	Biological Process: aging (GO:0007568);; Cellular Component: chloroplast (GO:0009507);;	--	Rhodanese-like domain-containing protein 7 OS=Arabidopsis thaliana GN=STR7 PE=2 SV=1	predicted protein [Hordeum vulgare subsp. vulgare]
comp1219_c0	1	p2	(GA)6	12	2330	2341	[G]	Carbohydrate transport and metabolism	Molecular Function: beta-fructofuranosidase activity (GO:0004564);; Cellular Component: extracellular region (GO:0005576);; Biological Process: carbohydrate metabolic process (GO:0005975);; Cellular Component: cytoplasmic membrane-bounded vesicle (GO:0016023);; Biological Process: response to stimulus (GO:0050896);;	K01193|0.0|rcu:RCOM_0293270|Beta-fructofuranosidase, insoluble isoenzyme 3 precursor, putative (EC:3.2.1.26)	Beta-fructofuranosidase, insoluble isoenzyme 1 OS=Daucus carota GN=INV1 PE=1 SV=1	cell wall invertase [Musa acuminata AAA Group]
comp12198_c0	1	p3	(GGA)5	15	337	351	--	--	Biological Process: protein targeting to vacuole (GO:0006623);; Biological Process: response to water deprivation (GO:0009414);; Biological Process: Golgi vesicle transport (GO:0048193);;	--	Protein DEHYDRATION-INDUCED 19 homolog 4 OS=Arabidopsis thaliana GN=DI19-4 PE=1 SV=1	Drought-responsive family protein isoform 1 [Theobroma cacao]
comp12199_c0	1	p2	(AG)9	18	1043	1060	[R]	General function prediction only	Molecular Function: RNA binding (GO:0003723);; Cellular Component: nucleus (GO:0005634);; Biological Process: photoperiodism, flowering (GO:0048573);;	--	RNA-binding protein 24-B OS=Xenopus laevis GN=rbm24-b PE=2 SV=1	PREDICTED: uncharacterized protein LOC100258188 [Vitis vinifera]
comp12200_c0	1	p1	(A)10	10	542	551	#N/A	#N/A	#N/A	#N/A	#N/A	#N/A
comp12214_c0	1	p3	(TGC)5	15	9	23	[R]	General function prediction only	--	--	Mediator of RNA polymerase II transcription subunit 15a OS=Arabidopsis thaliana GN=MED15A PE=1 SV=1	transcription cofactor, putative [Ricinus communis]
comp12218_c0	1	p2	(AG)7	14	1868	1881	--	--	Cellular Component: membrane (GO:0016020);;	--	Putative protein TPRXL OS=Homo sapiens GN=TPRXL PE=5 SV=2	Uncharacterized protein TCM_029736 [Theobroma cacao]
comp12219_c0	1	p3	(CGC)5	15	245	259	[F]	Nucleotide transport and metabolism	Molecular Function: uracil phosphoribosyltransferase activity (GO:0004845);; Molecular Function: GTP binding (GO:0005525);; Cellular Component: cytosol (GO:0005829);; Biological Process: uracil salvage (GO:0006223);; Cellular Component: chloroplast stroma (GO:0009570);; Biological Process: cellular response to phosphate starvation (GO:0016036);; Biological Process: developmental process (GO:00325…	K00761|1e-132|rcu:RCOM_1157550|uracil phosphoribosyltransferase, putative (EC:2.4.2.9)	Uracil phosphoribosyltransferase OS=Nicotiana tabacum GN=UPP PE=1 SV=1	hypothetical protein PRUPE_ppa009527mg [Prunus persica]
comp12222_c0	2	p1	(A)20	20	2385	2404	--	--	--	--	BTB/POZ domain-containing protein At3g50780 OS=Arabidopsis thaliana GN=At3g50780 PE=2 SV=1	PREDICTED: BTB/POZ domain-containing protein At3g50780 [Vitis vinifera]
comp12222_c0	1	p2	(CT)6	12	19	30	--	--	--	--	BTB/POZ domain-containing protein At3g50780 OS=Arabidopsis thaliana GN=At3g50780 PE=2 SV=1	PREDICTED: BTB/POZ domain-containing protein At3g50780 [Vitis vinifera]
comp12224_c0	1	p3	(GCA)6	18	475	492	--	--	--	--	Probable transcription factor RL9 OS=Oryza sativa subsp. japonica GN=RL9 PE=2 SV=2	PREDICTED: transcription repressor KAN1 [Vitis vinifera]
comp12226_c0	1	p3	(TGA)7	21	1038	1058	--	--	--	--	Protein ROOT PRIMORDIUM DEFECTIVE 1 OS=Arabidopsis thaliana GN=RPD1 PE=1 SV=1	PREDICTED: uncharacterized protein LOC100248200 [Vitis vinifera]
comp1223_c0	1	p1	(A)10	10	10	19	[OC]	--	Biological Process: maltose metabolic process (GO:0000023);; Molecular Function: enzyme inhibitor activity (GO:0004857);; Cellular Component: cytosol (GO:0005829);; Biological Process: pentose-phosphate shunt (GO:0006098);; Biological Process: regulation of carbohydrate metabolic process (GO:0006109);; Biological Process: glycerol ether metabolic process (GO:0006662);; Molecular Function: enzyme …	--	Thioredoxin F-type, chloroplastic OS=Pisum sativum PE=2 SV=1	uncharacterized protein LOC100499776 [Glycine max]
comp12230_c0	1	p2	(AG)6	12	1237	1248	--	--	--	--	Transcriptional regulator ATRX homolog OS=Caenorhabditis elegans GN=xnp-1 PE=1 SV=1	PREDICTED: uncharacterized protein LOC100242110 [Vitis vinifera]
comp12231_c0	1	p1	(T)21	21	3072	3092	[KL]	--	Molecular Function: DNA binding (GO:0003677);; Molecular Function: helicase activity (GO:0004386);; Molecular Function: ATP binding (GO:0005524);;	--	DNA repair and recombination protein RDH54 OS=Saccharomyces cerevisiae (strain JAY291) GN=RDH54 PE=3 SV=1	hypothetical protein PRUPE_ppa001303mg [Prunus persica]
comp12237_c0	1	p3	(CTT)7	21	184	204	--	--	Cellular Component: mitochondrion (GO:0005739);; Cellular Component: plastid (GO:0009536);;	--	--	hypothetical protein OsI_27934 [Oryza sativa Indica Group]
comp12239_c0	1	p2	(TC)8	16	1	16	--	--	--	--	Uncharacterized protein DDB_G0271670 OS=Dictyostelium discoideum GN=DDB_G0271670 PE=4 SV=1	Uncharacterized protein TCM_035488 [Theobroma cacao]
comp12245_c0	1	p2	(GA)8	16	1	16	[T]	Signal transduction mechanisms	Molecular Function: phosphorelay sensor kinase activity (GO:0000155);; Biological Process: phosphorelay signal transduction system (GO:0000160);; Molecular Function: ATP binding (GO:0005524);; Cellular Component: nucleus (GO:0005634);; Biological Process: chromatin organization (GO:0006325);; Biological Process: regulation of transcription, DNA-templated (GO:0006355);; Biological Process: respons…	--	Phytochrome B OS=Solanum tuberosum GN=PHYB PE=3 SV=2	phytochrome B [Vitis riparia]
comp12252_c0	1	p1	(C)11	11	430	440	#N/A	#N/A	#N/A	#N/A	#N/A	#N/A
comp12253_c0	1	p1	(A)10	10	77	86	#N/A	#N/A	#N/A	#N/A	#N/A	#N/A
comp12254_c0	1	p1	(A)10	10	959	968	--	--	Biological Process: metabolic process (GO:0008152);; Biological Process: system development (GO:0048731);;	K09284|1e-122|rcu:RCOM_0394760|Floral homeotic protein APETALA2, putative (EC:1.3.1.74)	Floral homeotic protein APETALA 2 OS=Arabidopsis thaliana GN=AP2 PE=1 SV=1	Floral homeotic protein APETALA2, putative [Ricinus communis]
comp12260_c0	1	p3	(GAT)5	15	866	880	--	--	Cellular Component: plastid (GO:0009536);; Biological Process: determination of bilateral symmetry (GO:0009855);; Biological Process: polarity specification of adaxial/abaxial axis (GO:0009944);; Biological Process: meristem initiation (GO:0010014);; Biological Process: regulation of meristem growth (GO:0010075);; Biological Process: floral whorl development (GO:0048438);; Biological Process: flo…	--	--	Os02g0811000 [Oryza sativa Japonica Group]
comp12268_c0	1	p2	(CT)6	12	3453	3464	[S]	Function unknown	Molecular Function: nucleotide binding (GO:0000166);; Molecular Function: protein kinase activity (GO:0004672);; Cellular Component: membrane (GO:0016020);; Cellular Component: cytoplasmic membrane-bounded vesicle (GO:0016023);; Biological Process: phosphorylation (GO:0016310);; Biological Process: cell wall organization (GO:0071555);;	--	Probable inactive receptor kinase At5g10020 OS=Arabidopsis thaliana GN=At5g10020 PE=1 SV=2	PREDICTED: probable inactive receptor kinase At5g10020 [Vitis vinifera]
comp12269_c0	2	p1	(C)11	11	3917	3927	--	--	Cellular Component: chloroplast (GO:0009507);;	--	Apoptosis-stimulating of p53 protein 2 OS=Homo sapiens GN=TP53BP2 PE=1 SV=2	SPOC domain / Transcription elongation factor S-II protein, putative isoform 1 [Theobroma cacao]
comp12269_c0	1	p3	(ATC)6	18	585	602	--	--	Cellular Component: chloroplast (GO:0009507);;	--	Apoptosis-stimulating of p53 protein 2 OS=Homo sapiens GN=TP53BP2 PE=1 SV=2	SPOC domain / Transcription elongation factor S-II protein, putative isoform 1 [Theobroma cacao]
comp12271_c0	1	p2	(TA)10	20	690	709	#N/A	#N/A	#N/A	#N/A	#N/A	#N/A
comp12272_c0	1	p1	(G)13	13	389	401	#N/A	#N/A	#N/A	#N/A	#N/A	#N/A
comp12278_c0	1	p1	(T)12	12	442	453	[R]	General function prediction only	Molecular Function: protein kinase activity (GO:0004672);; Molecular Function: ATP binding (GO:0005524);; Cellular Component: plasma membrane (GO:0005886);; Biological Process: protein phosphorylation (GO:0006468);; Cellular Component: plasmodesma (GO:0009506);;	--	Probable serine/threonine-protein kinase At5g41260 OS=Arabidopsis thaliana GN=At5g41260 PE=1 SV=1	unnamed protein product [Vitis vinifera]
comp12281_c0	1	p2	(GC)6	12	1631	1642	--	--	--	--	Golgin candidate 4 OS=Arabidopsis thaliana GN=GC4 PE=2 SV=1	PREDICTED: golgin candidate 4-like isoform 2 [Vitis vinifera]
comp12283_c0	1	p3	(TCT)6	18	414	431	[J]	Translation, ribosomal structure and biogenesis	Cellular Component: intracellular (GO:0005622);;	--	G patch domain-containing protein 11 OS=Homo sapiens GN=GPATCH11 PE=1 SV=3	PREDICTED: coiled-coil domain-containing protein 75-like [Cucumis sativus]
comp12284_c0	1	c	(A)11---(AAG)5	33	366	398	#N/A	#N/A	#N/A	#N/A	#N/A	#N/A
comp12284_c0	2	p1	(T)10	10	902	911	#N/A	#N/A	#N/A	#N/A	#N/A	#N/A
comp12285_c0	1	p1	(A)18	18	1	18	--	--	--	--	--	LRR and NB-ARC domains-containing disease resistance protein, putative [Theobroma cacao]
comp12285_c0	2	p1	(T)10	10	456	465	--	--	--	--	--	LRR and NB-ARC domains-containing disease resistance protein, putative [Theobroma cacao]
comp12288_c0	1	p1	(A)15	15	131	145	#N/A	#N/A	#N/A	#N/A	#N/A	#N/A
comp12289_c0	1	p1	(T)17	17	1561	1577	--	--	Cellular Component: cytoplasm (GO:0005737);;	--	Basic proline-rich protein OS=Sus scrofa PE=1 SV=2	ARM repeat superfamily protein isoform 1 [Theobroma cacao]
comp12291_c0	2	p1	(T)10	10	460	469	#N/A	#N/A	#N/A	#N/A	#N/A	#N/A
comp12291_c0	1	p2	(AT)10	20	4	23	#N/A	#N/A	#N/A	#N/A	#N/A	#N/A
comp12292_c0	1	p2	(TC)6	12	969	980	--	--	Biological Process: DNA-templated transcription, elongation (GO:0006354);; Biological Process: pyrimidine ribonucleotide biosynthetic process (GO:0009220);; Cellular Component: intracellular organelle (GO:0043229);; Cellular Component: cytoplasmic part (GO:0044444);;	--	Early nodulin-20 OS=Medicago truncatula GN=ENOD20 PE=3 SV=1	PREDICTED: 50S ribosomal protein L23-like [Cucumis sativus]
comp12294_c0	1	p1	(T)16	16	1	16	#N/A	#N/A	#N/A	#N/A	#N/A	#N/A
comp12299_c0	1	p2	(TC)10	20	1	20	[L]	Replication, recombination and repair	Molecular Function: DNA binding (GO:0003677);; Molecular Function: ATP binding (GO:0005524);; Cellular Component: nucleus (GO:0005634);; Biological Process: DNA-dependent DNA replication (GO:0006261);; Biological Process: embryo development ending in seed dormancy (GO:0009793);; Molecular Function: nucleoside-triphosphatase activity (GO:0017111);;	K10756|0.0|vvi:100247946|hypothetical protein LOC100247946	Replication factor C subunit 5 OS=Oryza sativa subsp. japonica GN=RFC5 PE=2 SV=1	PREDICTED: probable replication factor C subunit 3 [Vitis vinifera]
comp12301_c0	1	p1	(A)12	12	429	440	--	--	Cellular Component: nucleus (GO:0005634);; Biological Process: signal transduction (GO:0007165);; Molecular Function: oxysterol binding (GO:0008142);; Biological Process: steroid metabolic process (GO:0008202);; Molecular Function: phosphatidylinositol binding (GO:0035091);;	--	Oxysterol-binding protein-related protein 2A OS=Arabidopsis thaliana GN=ORP2A PE=2 SV=1	OSBP(oxysterol binding protein)-related protein 2A isoform 5 [Theobroma cacao]
comp12304_c0	1	p2	(GA)9	18	1	18	#N/A	#N/A	#N/A	#N/A	#N/A	#N/A
comp1231_c0	1	p2	(AG)7	14	1141	1154	[I]	Lipid transport and metabolism	Cellular Component: peroxisome (GO:0005777);; Biological Process: fatty acid beta-oxidation (GO:0006635);; Cellular Component: plastid (GO:0009536);; Molecular Function: isomerase activity (GO:0016853);;	K01692|1e-136|vvi:100246523|hypothetical protein LOC100246523	Probable enoyl-CoA hydratase, mitochondrial OS=Dictyostelium discoideum GN=echs1 PE=3 SV=1	enoyl-CoA hydratase [Elaeis oleifera]
comp12311_c0	1	p1	(A)10	10	456	465	--	--	--	--	--	conserved hypothetical protein [Ricinus communis]
comp12315_c1	1	c*	(CA)8(A)10*	25	74	98	#N/A	#N/A	#N/A	#N/A	#N/A	#N/A
comp12315_c1	2	p2	(TG)8	16	546	561	#N/A	#N/A	#N/A	#N/A	#N/A	#N/A
comp12318_c0	1	p3	(GAG)5	15	686	700	[RTKL]	--	Molecular Function: protein serine/threonine kinase activity (GO:0004674);; Molecular Function: ATP binding (GO:0005524);; Cellular Component: plasma membrane (GO:0005886);; Biological Process: protein phosphorylation (GO:0006468);; Biological Process: signal transduction (GO:0007165);;	--	CBL-interacting serine/threonine-protein kinase 5 OS=Arabidopsis thaliana GN=CIPK5 PE=2 SV=1	predicted protein [Arabidopsis lyrata subsp. lyrata]
comp12319_c0	1	p1	(A)11	11	105	115	--	--	Cellular Component: chloroplast (GO:0009507);; Biological Process: sterol biosynthetic process (GO:0016126);; Molecular Function: violaxanthin de-epoxidase activity (GO:0046422);; Biological Process: oxidation-reduction process (GO:0055114);;	--	Violaxanthin de-epoxidase, chloroplastic OS=Nicotiana tabacum GN=VDE1 PE=2 SV=1	predicted protein [Populus trichocarpa]
comp1232_c0	1	p2	(CT)7	14	2720	2733	[Q]	Secondary metabolites biosynthesis, transport and catabolism	Molecular Function: copper ion binding (GO:0005507);; Cellular Component: vacuole (GO:0005773);; Molecular Function: primary amine oxidase activity (GO:0008131);; Biological Process: amine metabolic process (GO:0009308);; Cellular Component: cytoplasmic membrane-bounded vesicle (GO:0016023);; Molecular Function: quinone binding (GO:0048038);; Biological Process: oxidation-reduction process (GO:00…	--	Primary amine oxidase OS=Arabidopsis thaliana GN=At1g62810 PE=2 SV=1	Amine oxidase [copper-containing] precursor, putative [Ricinus communis]
comp12322_c0	1	p1	(A)10	10	116	125	--	--	Molecular Function: ligase activity (GO:0016874);;	--	U-box domain-containing protein 4 OS=Arabidopsis thaliana GN=PUB4 PE=1 SV=3	PREDICTED: U-box domain-containing protein 4 [Vitis vinifera]
comp12324_c0	1	c	(AT)8---(TTA)8	59	499	557	--	--	--	--	Putative membrane protein 047R OS=Invertebrate iridescent virus 3 GN=IIV3-047R PE=3 SV=1	hypothetical protein AURANDRAFT_70520 [Aureococcus anophagefferens]
comp12326_c0	1	p2	(TC)8	16	1	16	--	--	Cellular Component: cell wall (GO:0005618);; Cellular Component: nucleus (GO:0005634);; Biological Process: regulation of transcription, DNA-templated (GO:0006355);; Molecular Function: transcription regulatory region DNA binding (GO:0044212);; Biological Process: integument development (GO:0080060);;	--	Probable transcription factor KAN4 OS=Arabidopsis thaliana GN=KAN4 PE=1 SV=1	PREDICTED: probable transcription factor KAN4-like [Vitis vinifera]
comp12329_c1	1	p2	(TG)11	22	1	22	[TZDR]	--	Molecular Function: calmodulin-dependent protein kinase activity (GO:0004683);; Molecular Function: calcium ion binding (GO:0005509);; Molecular Function: ATP binding (GO:0005524);; Cellular Component: plasma membrane (GO:0005886);; Biological Process: protein phosphorylation (GO:0006468);;	K13412|1e-137|vvi:100246691|hypothetical protein LOC100246691	Calcium-dependent protein kinase 10 OS=Arabidopsis thaliana GN=CPK10 PE=1 SV=1	calcium-dependent protein kinase [Solanum nigrum]
comp12333_c0	1	c	(TTC)7---(GA)6	112	1	112	--	--	Cellular Component: ubiquitin ligase complex (GO:0000151);; Molecular Function: ubiquitin-protein ligase activity (GO:0004842);; Molecular Function: zinc ion binding (GO:0008270);; Biological Process: regulation of seed germination (GO:0010029);; Biological Process: protein ubiquitination (GO:0016567);;	--	U-box domain-containing protein 19 OS=Arabidopsis thaliana GN=PUB19 PE=2 SV=1	predicted protein [Hordeum vulgare subsp. vulgare]
comp12335_c0	1	p1	(T)10	10	932	941	--	--	--	--	--	unnamed protein product [Vitis vinifera]
comp12338_c0	1	c	(A)12---(A)10	44	225	268	--	--	Cellular Component: anchored component of membrane (GO:0031225);;	--	Leucine-rich repeat extensin-like protein 6 OS=Arabidopsis thaliana GN=LRX6 PE=2 SV=1	nutrient reservoir, putative [Ricinus communis]
comp12344_c0	1	p3	(GAA)7	21	1815	1835	[O]	Posttranslational modification, protein turnover, chaperones	Molecular Function: farnesyltranstransferase activity (GO:0004311);; Molecular Function: protein farnesyltransferase activity (GO:0004660);; Molecular Function: protein binding (GO:0005515);; Cellular Component: mitochondrion (GO:0005739);; Cellular Component: protein farnesyltransferase complex (GO:0005965);; Biological Process: fatty acid beta-oxidation (GO:0006635);; Biological Process: respon…	K05954|1e-103|osa:4327880|Os01g0737800	Protein farnesyltransferase subunit beta OS=Arabidopsis thaliana GN=FTB PE=1 SV=3	Protein farnesyltransferase subunit beta [Aegilops tauschii]
comp12352_c0	2	p2	(TG)6	12	1017	1028	[J]	Translation, ribosomal structure and biogenesis	Molecular Function: electron carrier activity (GO:0009055);; Molecular Function: protein disulfide oxidoreductase activity (GO:0015035);; Biological Process: cell redox homeostasis (GO:0045454);;	--	Uncharacterized protein At5g39865 OS=Arabidopsis thaliana GN=At5g39865 PE=1 SV=1	hypothetical protein POPTRDRAFT_416706 [Populus trichocarpa]
comp12352_c0	1	p3	(CAG)5	15	227	241	[J]	Translation, ribosomal structure and biogenesis	Molecular Function: electron carrier activity (GO:0009055);; Molecular Function: protein disulfide oxidoreductase activity (GO:0015035);; Biological Process: cell redox homeostasis (GO:0045454);;	--	Uncharacterized protein At5g39865 OS=Arabidopsis thaliana GN=At5g39865 PE=1 SV=1	hypothetical protein POPTRDRAFT_416706 [Populus trichocarpa]
comp12357_c0	1	p2	(TC)6	12	104	115	[F]	Nucleotide transport and metabolism	Molecular Function: catalytic activity (GO:0003824);; Cellular Component: mitochondrion (GO:0005739);; Biological Process: cellular process (GO:0009987);;	--	Putative glutamine amidotransferase YLR126C OS=Saccharomyces cerevisiae (strain ATCC 204508 / S288c) GN=YLR126C PE=1 SV=1	hypothetical protein SELMODRAFT_110438 [Selaginella moellendorffii]
comp12358_c0	1	p1	(C)13	13	3486	3498	[D]	Cell cycle control, cell division, chromosome partitioning	Biological Process: protein import into nucleus, docking (GO:0000059);; Cellular Component: nuclear pore (GO:0005643);; Cellular Component: cytoplasm (GO:0005737);; Molecular Function: Ran GTPase binding (GO:0008536);; Molecular Function: protein transporter activity (GO:0008565);;	--	Importin-11 OS=Mus musculus GN=Ipo11 PE=1 SV=1	PREDICTED: importin-11-like [Vitis vinifera]
comp1236_c1	1	p2	(CT)6	12	85	96	--	--	--	K11982|1e-122|vvi:100250148|hypothetical protein LOC100250148	E3 ubiquitin-protein ligase RING1-like OS=Arabidopsis thaliana GN=At3g19950 PE=2 SV=1	hypothetical protein PRUPE_ppa007335mg [Prunus persica]
comp12374_c0	1	p3	(CCT)5	15	857	871	--	--	--	--	Protein P21 OS=Glycine max PE=1 SV=1	pathogenesis related protein-5 [Populus tomentosa]
comp12376_c0	1	p1	(T)17	17	1	17	#N/A	#N/A	#N/A	#N/A	#N/A	#N/A
comp12377_c0	1	p1	(A)10	10	757	766	--	--	Cellular Component: plastid (GO:0009536);;	--	--	hypothetical protein OsI_05242 [Oryza sativa Indica Group]
comp1238_c0	1	p2	(TC)10	20	1898	1917	[E]	Amino acid transport and metabolism	Cellular Component: mitochondrion (GO:0005739);; Biological Process: metabolic process (GO:0008152);; Molecular Function: alanine-glyoxylate transaminase activity (GO:0008453);; Molecular Function: pyridoxal phosphate binding (GO:0030170);;	K00827|0.0|sbi:SORBI_09g023310|hypothetical protein	Alanine--glyoxylate aminotransferase 2 homolog 3, mitochondrial OS=Arabidopsis thaliana GN=At3g08860 PE=2 SV=1	hypothetical protein OsI_20323 [Oryza sativa Indica Group]
comp1238_c0	2	p3	(CGG)7	21	2045	2065	[E]	Amino acid transport and metabolism	Cellular Component: mitochondrion (GO:0005739);; Biological Process: metabolic process (GO:0008152);; Molecular Function: alanine-glyoxylate transaminase activity (GO:0008453);; Molecular Function: pyridoxal phosphate binding (GO:0030170);;	K00827|0.0|sbi:SORBI_09g023310|hypothetical protein	Alanine--glyoxylate aminotransferase 2 homolog 3, mitochondrial OS=Arabidopsis thaliana GN=At3g08860 PE=2 SV=1	hypothetical protein OsI_20323 [Oryza sativa Indica Group]
comp12382_c0	1	p1	(T)12	12	262	273	#N/A	#N/A	#N/A	#N/A	#N/A	#N/A
comp12382_c0	2	p1	(T)11	11	651	661	#N/A	#N/A	#N/A	#N/A	#N/A	#N/A
comp12384_c0	1	p2	(GA)9	18	549	566	#N/A	#N/A	#N/A	#N/A	#N/A	#N/A
comp12391_c0	1	p2	(AT)6	12	169	180	--	--	Biological Process: polysaccharide biosynthetic process (GO:0000271);; Molecular Function: monooxygenase activity (GO:0004497);; Molecular Function: iron ion binding (GO:0005506);; Molecular Function: electron carrier activity (GO:0009055);; Biological Process: multidimensional cell growth (GO:0009825);; Biological Process: positive regulation of flower development (GO:0009911);; Biological Proce…	K09588|1e-30|sbi:SORBI_05g002580|hypothetical protein	Cytochrome P450 90A1 OS=Arabidopsis thaliana GN=CYP90A1 PE=2 SV=1	unknown [Zea mays]
comp12391_c0	2	p3	(TGC)5	15	526	540	--	--	Biological Process: polysaccharide biosynthetic process (GO:0000271);; Molecular Function: monooxygenase activity (GO:0004497);; Molecular Function: iron ion binding (GO:0005506);; Molecular Function: electron carrier activity (GO:0009055);; Biological Process: multidimensional cell growth (GO:0009825);; Biological Process: positive regulation of flower development (GO:0009911);; Biological Proce…	K09588|1e-30|sbi:SORBI_05g002580|hypothetical protein	Cytochrome P450 90A1 OS=Arabidopsis thaliana GN=CYP90A1 PE=2 SV=1	unknown [Zea mays]
comp12402_c0	1	p1	(T)20	20	1364	1383	[I]	Lipid transport and metabolism	Cellular Component: mitochondrion (GO:0005739);; Biological Process: protein folding (GO:0006457);; Biological Process: protein targeting to mitochondrion (GO:0006626);; Biological Process: biosynthetic process (GO:0009058);; Biological Process: response to heat (GO:0009408);; Biological Process: response to high light intensity (GO:0009644);; Molecular Function: transferase activity (GO:0016740)…	--	NADH dehydrogenase (ubiquinone) complex I, assembly factor 6 OS=Rattus norvegicus GN=Ndufaf6 PE=3 SV=1	hypothetical protein SORBIDRAFT_10g000450 [Sorghum bicolor]
comp12411_c0	1	p1	(A)14	14	1448	1461	--	--	Cellular Component: endosome (GO:0005768);; Cellular Component: Golgi apparatus (GO:0005794);; Cellular Component: trans-Golgi network (GO:0005802);; Molecular Function: methyltransferase activity (GO:0008168);; Biological Process: response to desiccation (GO:0009269);; Biological Process: response to cold (GO:0009409);; Biological Process: response to salt stress (GO:0009651);; Biological Proces…	--	Probable methyltransferase PMT21 OS=Arabidopsis thaliana GN=ERD3 PE=2 SV=1	hypothetical protein PRUPE_ppa003130mg [Prunus persica]
comp12411_c0	2	p2	(CT)9	18	1939	1956	--	--	Cellular Component: endosome (GO:0005768);; Cellular Component: Golgi apparatus (GO:0005794);; Cellular Component: trans-Golgi network (GO:0005802);; Molecular Function: methyltransferase activity (GO:0008168);; Biological Process: response to desiccation (GO:0009269);; Biological Process: response to cold (GO:0009409);; Biological Process: response to salt stress (GO:0009651);; Biological Proces…	--	Probable methyltransferase PMT21 OS=Arabidopsis thaliana GN=ERD3 PE=2 SV=1	hypothetical protein PRUPE_ppa003130mg [Prunus persica]
comp12412_c0	1	p1	(T)12	12	971	982	#N/A	#N/A	#N/A	#N/A	#N/A	#N/A
comp12413_c0	1	p3	(GCG)5	15	583	597	--	--	--	--	Protein SPT2 homolog OS=Xenopus laevis GN=spty2d1 PE=2 SV=1	PREDICTED: uncharacterized protein LOC101306612 [Fragaria vesca subsp. vesca]
comp12415_c0	1	p2	(AG)10	20	906	925	--	--	Biological Process: metal ion transport (GO:0030001);; Molecular Function: metal ion binding (GO:0046872);;	--	Heavy metal-associated isoprenylated plant protein 26 OS=Arabidopsis thaliana GN=HIPP26 PE=1 SV=1	PREDICTED: uncharacterized protein LOC100255386 [Vitis vinifera]
comp12419_c0	1	p3	(GGA)5	15	1435	1449	--	--	Cellular Component: plastid chromosome (GO:0009508);; Cellular Component: chloroplast thylakoid membrane (GO:0009535);; Cellular Component: chloroplast envelope (GO:0009941);;	--	Extensin OS=Nicotiana tabacum GN=HRGPNT3 PE=2 SV=1	PREDICTED: uncharacterized protein LOC100259626 [Vitis vinifera]
comp1242_c0	1	p1	(T)12	12	947	958	[G]	Carbohydrate transport and metabolism	Molecular Function: alpha-amylase activity (GO:0004556);; Molecular Function: calcium ion binding (GO:0005509);; Cellular Component: extracellular region (GO:0005576);; Biological Process: starch catabolic process (GO:0005983);; Biological Process: circadian rhythm (GO:0007623);; Cellular Component: chloroplast stroma (GO:0009570);; Molecular Function: glucan 1,4-alpha-maltotetraohydrolase activi…	--	Alpha-amylase 3, chloroplastic OS=Arabidopsis thaliana GN=AMY3 PE=2 SV=1	PREDICTED: alpha-amylase 3, chloroplastic-like [Cucumis sativus]
comp12421_c0	1	p2	(AG)6	12	2941	2952	--	--	Cellular Component: plastid (GO:0009536);;	--	Pentatricopeptide repeat-containing protein At5g27270 OS=Arabidopsis thaliana GN=EMB976 PE=2 SV=2	Tetratricopeptide repeat (TPR)-like superfamily protein, putative isoform 2 [Theobroma cacao]
comp12425_c0	1	p1	(T)12	12	1003	1014	#N/A	#N/A	#N/A	#N/A	#N/A	#N/A
comp12427_c0	1	p2	(GA)10	20	1	20	--	--	--	--	GATA transcription factor 5 OS=Arabidopsis thaliana GN=GATA5 PE=2 SV=1	PREDICTED: GATA transcription factor 5-like [Setaria italica]
comp12429_c0	1	p3	(GCG)6	18	69	86	[R]	General function prediction only	Molecular Function: endoribonuclease activity (GO:0004521);;	--	Diphthine--ammonia ligase OS=Schizosaccharomyces pombe (strain 972 / ATCC 24843) GN=mug71 PE=1 SV=1	PREDICTED: meiotically up-regulated gene 71 protein [Vitis vinifera]
comp12438_c0	1	p2	(CT)6	12	238	249	--	--	--	--	--	FHA domain protein SNIP1 [Aspergillus niger CBS 513.88]
comp1244_c0	1	p1	(T)10	10	2590	2599	--	--	--	--	Uncharacterized protein BHLF1 OS=Epstein-Barr virus (strain B95-8) GN=BHLF1 PE=4 SV=1	PREDICTED: uncharacterized protein LOC100829005 [Brachypodium distachyon]
comp12440_c0	1	p1	(A)10	10	131	140	#N/A	#N/A	#N/A	#N/A	#N/A	#N/A
comp12443_c0	1	p3	(CAG)6	18	19	36	--	--	Molecular Function: microtubule motor activity (GO:0003777);; Cellular Component: microtubule associated complex (GO:0005875);; Biological Process: microtubule-based process (GO:0007017);;	--	Dynein light chain, cytoplasmic OS=Dictyostelium discoideum GN=dlcB PE=3 SV=1	PREDICTED: dynein light chain LC6, flagellar outer arm-like [Glycine max]
comp12454_c0	1	p2	(AT)10	20	1	20	--	--	Molecular Function: nucleotide binding (GO:0000166);; Molecular Function: nucleic acid binding (GO:0003676);; Biological Process: nucleobase-containing compound metabolic process (GO:0006139);; Biological Process: proteolysis (GO:0006508);; Molecular Function: nucleoside-triphosphatase activity (GO:0017111);; Biological Process: protein catabolic process (GO:0030163);; Biological Process: cellula…	--	--	PREDICTED: uncharacterized protein LOC100840703 [Brachypodium distachyon]
comp12455_c0	1	c	(A)10---(T)10	59	89	147	--	--	Cellular Component: nucleus (GO:0005634);; Biological Process: response to high light intensity (GO:0009644);; Biological Process: response to hydrogen peroxide (GO:0042542);;	--	--	RNI-like superfamily protein isoform 1 [Theobroma cacao]
comp12456_c0	1	p3	(GAG)6	18	7	24	--	--	Molecular Function: binding (GO:0005488);;	--	Zinc finger CCCH domain-containing protein 62 OS=Oryza sativa subsp. japonica GN=Os10g0391300 PE=2 SV=2	predicted protein [Populus trichocarpa]
comp12460_c0	1	p2	(GA)10	20	1	20	--	--	Molecular Function: catalytic activity (GO:0003824);; Molecular Function: binding (GO:0005488);; Biological Process: cellular metabolic process (GO:0044237);; Biological Process: organic substance metabolic process (GO:0071704);;	--	Uncharacterized mitochondrial protein AtMg01250 OS=Arabidopsis thaliana GN=AtMg01250 PE=4 SV=1	PREDICTED: uncharacterized protein LOC100249130 [Vitis vinifera]
comp12463_c0	1	p1	(A)11	11	193	203	--	--	--	--	Protein LHY OS=Arabidopsis thaliana GN=LHY PE=1 SV=2	PREDICTED: uncharacterized protein LOC100263252 [Vitis vinifera]
comp12464_c0	1	p1	(A)18	18	1	18	--	--	Cellular Component: membrane (GO:0016020);;	--	--	predicted protein [Populus trichocarpa]
comp12465_c0	1	p1	(T)10	10	1042	1051	[J]	Translation, ribosomal structure and biogenesis	Biological Process: maturation of LSU-rRNA from tetracistronic rRNA transcript (SSU-rRNA, LSU-rRNA, 4.5S-rRNA, 5S-rRNA) (GO:0000488);; Biological Process: maturation of SSU-rRNA from tetracistronic rRNA transcript (SSU-rRNA, LSU-rRNA, 4.5S-rRNA, 5S-rRNA) (GO:0000489);; Biological Process: pseudouridine synthesis (GO:0001522);; Molecular Function: RNA binding (GO:0003723);; Cellular Component: amy…	--	Uncharacterized RNA pseudouridine synthase aq_1464 OS=Aquifex aeolicus (strain VF5) GN=aq_1464 PE=3 SV=1	unnamed protein product [Vitis vinifera]
comp12476_c0	1	p2	(TA)7	14	1221	1234	--	--	--	--	Uncharacterized protein At4g00950 OS=Arabidopsis thaliana GN=At4g00950 PE=2 SV=1	Uncharacterized protein TCM_015429 [Theobroma cacao]
comp12478_c0	1	p3	(GCC)6	18	297	314	--	--	Cellular Component: integral component of membrane (GO:0016021);; Molecular Function: oxidoreductase activity (GO:0016491);; Molecular Function: substrate-specific transmembrane transporter activity (GO:0022891);; Biological Process: transmembrane transport (GO:0055085);;	--	Sugar transport protein 4 OS=Arabidopsis thaliana GN=STP4 PE=1 SV=1	predicted protein [Populus trichocarpa]
comp12479_c0	1	p2	(GA)8	16	2999	3014	[Z]	Cytoskeleton	Molecular Function: ATP binding (GO:0005524);; Cellular Component: nucleus (GO:0005634);; Cellular Component: kinesin complex (GO:0005871);; Cellular Component: spindle microtubule (GO:0005876);; Biological Process: microtubule-based movement (GO:0007018);; Molecular Function: microtubule binding (GO:0008017);; Molecular Function: minus-end-directed microtubule motor activity (GO:0008569);; Cellu…	K10405|0.0|vvi:100263221|hypothetical protein LOC100263221	Kinesin-5 OS=Arabidopsis thaliana GN=ATK5 PE=2 SV=1	PREDICTED: kinesin-1-like [Vitis vinifera]
comp12480_c0	1	p3	(ACA)6	18	222	239	--	--	Molecular Function: ubiquitin-protein ligase activity (GO:0004842);; Cellular Component: nucleus (GO:0005634);; Biological Process: ubiquitin-dependent protein catabolic process (GO:0006511);; Biological Process: multicellular organismal development (GO:0007275);; Molecular Function: zinc ion binding (GO:0008270);; Biological Process: protein ubiquitination (GO:0016567);;	K04506|1e-18|vvi:100252009|hypothetical protein LOC100252009	E3 ubiquitin-protein ligase SINAT5 OS=Arabidopsis thaliana GN=SINAT5 PE=1 SV=2	ubiquitin ligase SINAT3 [Elaeis guineensis]
comp12488_c0	2	p1	(T)13	13	1063	1075	--	--	Cellular Component: chloroplast (GO:0009507);;	--	Putative protein TPRXL OS=Homo sapiens GN=TPRXL PE=5 SV=2	PREDICTED: uncharacterized protein LOC101292949 [Fragaria vesca subsp. vesca]
comp12488_c0	1	p2	(GT)9	18	86	103	--	--	Cellular Component: chloroplast (GO:0009507);;	--	Putative protein TPRXL OS=Homo sapiens GN=TPRXL PE=5 SV=2	PREDICTED: uncharacterized protein LOC101292949 [Fragaria vesca subsp. vesca]
comp12490_c0	1	p1	(A)10	10	2894	2903	--	--	Molecular Function: signal transducer activity (GO:0004871);; Cellular Component: plasma membrane (GO:0005886);; Biological Process: response to light stimulus (GO:0009416);;	--	BTB/POZ domain-containing protein At3g44820 OS=Arabidopsis thaliana GN=At3g44820 PE=2 SV=2	protein binding protein, putative [Ricinus communis]
comp12491_c0	1	p3	(GGT)6	18	1	18	--	--	Molecular Function: calmodulin binding (GO:0005516);; Cellular Component: mitochondrion (GO:0005739);; Biological Process: auxin-activated signaling pathway (GO:0009734);;	K14488|3e-53|vvi:100259386|hypothetical protein LOC100259386	Auxin-induced protein 6B OS=Glycine max PE=2 SV=1	PREDICTED: auxin-induced protein 6B-like [Vitis vinifera]
comp125_c0	1	p2	(AG)6	12	853	864	--	--	Cellular Component: chromatin (GO:0000785);; Molecular Function: DNA binding (GO:0003677);; Molecular Function: chromatin binding (GO:0003682);; Molecular Function: sequence-specific DNA binding transcription factor activity (GO:0003700);; Biological Process: glucose catabolic process (GO:0006007);; Biological Process: chromatin assembly or disassembly (GO:0006333);; Biological Process: regulatio…	--	High mobility group B protein 1 OS=Arabidopsis thaliana GN=HMGB1 PE=1 SV=1	PREDICTED: high mobility group B protein 1-like [Vitis vinifera]
comp12503_c0	1	p3	(CGC)5	15	1422	1436	--	--	--	--	Zinc finger protein VAR3, chloroplastic OS=Arabidopsis thaliana GN=VAR3 PE=1 SV=2	Os03g0708900 [Oryza sativa Japonica Group]
comp12509_c0	1	p1	(T)12	12	759	770	#N/A	#N/A	#N/A	#N/A	#N/A	#N/A
comp12516_c0	1	p2	(GA)10	20	335	354	#N/A	#N/A	#N/A	#N/A	#N/A	#N/A
comp12525_c0	1	c	(GA)7---(TC)9	83	1346	1428	#N/A	#N/A	#N/A	#N/A	#N/A	#N/A
comp12529_c0	1	p2	(TA)8	16	328	343	--	--	--	--	Translation initiation factor IF-2 OS=Frankia alni (strain ACN14a) GN=infB PE=3 SV=1	predicted protein [Hordeum vulgare subsp. vulgare]
comp12529_c0	2	p3	(GAC)5	15	641	655	--	--	--	--	Translation initiation factor IF-2 OS=Frankia alni (strain ACN14a) GN=infB PE=3 SV=1	predicted protein [Hordeum vulgare subsp. vulgare]
comp1253_c1	2	p1	(T)10	10	2880	2889	--	--	--	--	IST1-like protein OS=Dictyostelium discoideum GN=DDB_G0289029 PE=3 SV=1	PREDICTED: uncharacterized protein LOC101760548 [Setaria italica]
comp1253_c1	1	p2	(CT)8	16	31	46	--	--	--	--	IST1-like protein OS=Dictyostelium discoideum GN=DDB_G0289029 PE=3 SV=1	PREDICTED: uncharacterized protein LOC101760548 [Setaria italica]
comp12531_c0	2	p1	(T)10	10	183	192	--	--	--	--	--	predicted protein [Populus trichocarpa]
comp12531_c0	1	p2	(AG)9	18	1	18	--	--	--	--	--	predicted protein [Populus trichocarpa]
comp12536_c0	1	p2	(AG)8	16	1	16	--	--	Cellular Component: nucleus (GO:0005634);; Biological Process: sister chromatid cohesion (GO:0007062);; Biological Process: reciprocal meiotic recombination (GO:0007131);; Biological Process: organ morphogenesis (GO:0009887);; Biological Process: tissue development (GO:0009888);; Biological Process: vegetative to reproductive phase transition of meristem (GO:0010228);; Biological Process: positiv…	--	--	PREDICTED: uncharacterized protein LOC100240965 [Vitis vinifera]
comp12539_c0	1	p2	(CA)9	18	2483	2500	--	--	Molecular Function: ferric-chelate reductase activity (GO:0000293);; Molecular Function: iron ion binding (GO:0005506);; Cellular Component: plastid (GO:0009536);; Cellular Component: membrane (GO:0016020);; Biological Process: electron transport chain (GO:0022900);;	--	Ferric reduction oxidase 7, chloroplastic OS=Arabidopsis thaliana GN=FRO7 PE=2 SV=1	PREDICTED: ferric reduction oxidase 7, chloroplastic-like [Vitis vinifera]
comp1254_c0	1	p2	(TC)7	14	274	287	[IQ]	--	Molecular Function: acetate-CoA ligase activity (GO:0003987);; Cellular Component: peroxisome (GO:0005777);; Biological Process: acetate metabolic process (GO:0006083);; Biological Process: glyoxylate cycle (GO:0006097);; Molecular Function: o-succinylbenzoate-CoA ligase activity (GO:0008756);; Molecular Function: AMP binding (GO:0016208);; Biological Process: butyrate metabolic process (GO:00196…	--	Acetate/butyrate--CoA ligase AAE7, peroxisomal OS=Arabidopsis thaliana GN=AAE7 PE=1 SV=1	putative AMP-dependent synthetase and ligase superfamily protein [Zea mays]
comp12541_c0	1	p3	(GCA)7	21	1	21	--	--	--	--	Auxin response factor 19 OS=Oryza sativa subsp. japonica GN=ARF19 PE=2 SV=2	unnamed protein product [Vitis vinifera]
comp12542_c0	1	p1	(A)10	10	92	101	#N/A	#N/A	#N/A	#N/A	#N/A	#N/A
comp12546_c0	1	p3	(TCT)5	15	1849	1863	--	--	Biological Process: DNA metabolic process (GO:0006259);; Cellular Component: intracellular membrane-bounded organelle (GO:0043231);;	--	Vegetative cell wall protein gp1 OS=Chlamydomonas reinhardtii GN=GP1 PE=2 SV=1	unnamed protein product [Vitis vinifera]
comp12547_c0	1	p1	(T)11	11	6	16	[R]	General function prediction only	Molecular Function: hydrolase activity (GO:0016787);;	--	Inactive rhomboid protein 1 OS=Danio rerio GN=rhbdf1 PE=2 SV=1	unnamed protein product [Vitis vinifera]
comp12552_c1	2	p1	(T)10	10	167	176	#N/A	#N/A	#N/A	#N/A	#N/A	#N/A
comp12552_c1	1	p2	(CT)10	20	1	20	#N/A	#N/A	#N/A	#N/A	#N/A	#N/A
comp12558_c0	2	p1	(T)12	12	810	821	#N/A	#N/A	#N/A	#N/A	#N/A	#N/A
comp12558_c0	1	p2	(CT)7	14	96	109	#N/A	#N/A	#N/A	#N/A	#N/A	#N/A
comp12560_c0	1	p3	(GCA)5	15	2087	2101	[R]	General function prediction only	--	--	Ankyrin repeat-containing protein At5g02620 OS=Arabidopsis thaliana GN=At5g02620 PE=1 SV=1	Ankyrin repeat family protein isoform 1 [Theobroma cacao]
comp12561_c0	1	p1	(G)10	10	1	10	--	--	--	--	Serine-rich adhesin for platelets OS=Staphylococcus aureus GN=sraP PE=3 SV=1	Uncharacterized protein isoform 1 [Theobroma cacao]
comp12561_c0	2	p1	(T)15	15	3923	3937	--	--	--	--	Serine-rich adhesin for platelets OS=Staphylococcus aureus GN=sraP PE=3 SV=1	Uncharacterized protein isoform 1 [Theobroma cacao]
comp12564_c0	1	p3	(GCA)7	21	1	21	--	--	Molecular Function: catalytic activity (GO:0003824);;	--	Vegetative cell wall protein gp1 OS=Chlamydomonas reinhardtii GN=GP1 PE=2 SV=1	hypothetical protein EMIHUDRAFT_433316 [Emiliania huxleyi CCMP1516]
comp12566_c0	1	p2	(TA)8	16	35	50	--	--	--	--	Thaumatin-like protein OS=Arabidopsis thaliana GN=At1g18250 PE=2 SV=2	PREDICTED: thaumatin-like protein 1-like [Cucumis sativus]
comp12572_c0	1	p3	(CCA)5	15	379	393	--	--	--	--	Formin-like protein 2 OS=Homo sapiens GN=FMNL2 PE=1 SV=3	PREDICTED: protein CHUP1, chloroplastic-like [Setaria italica]
comp1259_c0	2	p1	(A)10	10	2722	2731	[J]	Translation, ribosomal structure and biogenesis	Molecular Function: RNA binding (GO:0003723);; Biological Process: mRNA processing (GO:0006397);; Biological Process: tRNA processing (GO:0008033);; Biological Process: RNA splicing (GO:0008380);; Cellular Component: chloroplast (GO:0009507);;	--	Maturase K OS=Zantedeschia aethiopica GN=matK PE=3 SV=1	maturase K [Zantedeschia albomaculata]
comp1259_c0	3	p1	(T)11	11	3863	3873	[J]	Translation, ribosomal structure and biogenesis	Molecular Function: RNA binding (GO:0003723);; Biological Process: mRNA processing (GO:0006397);; Biological Process: tRNA processing (GO:0008033);; Biological Process: RNA splicing (GO:0008380);; Cellular Component: chloroplast (GO:0009507);;	--	Maturase K OS=Zantedeschia aethiopica GN=matK PE=3 SV=1	maturase K [Zantedeschia albomaculata]
comp1259_c0	1	p2	(TA)8	16	1	16	[J]	Translation, ribosomal structure and biogenesis	Molecular Function: RNA binding (GO:0003723);; Biological Process: mRNA processing (GO:0006397);; Biological Process: tRNA processing (GO:0008033);; Biological Process: RNA splicing (GO:0008380);; Cellular Component: chloroplast (GO:0009507);;	--	Maturase K OS=Zantedeschia aethiopica GN=matK PE=3 SV=1	maturase K [Zantedeschia albomaculata]
comp12592_c0	1	p2	(GA)10	20	1	20	--	--	Cellular Component: vacuole (GO:0005773);; Biological Process: regulation of transcription, DNA-templated (GO:0006355);;	--	BES1/BZR1 homolog protein 4 OS=Arabidopsis thaliana GN=BEH4 PE=1 SV=1	unnamed protein product [Vitis vinifera]
comp12595_c0	1	p1	(A)11	11	1754	1764	[KR]	--	Biological Process: tryptophan catabolic process (GO:0006569);; Biological Process: water transport (GO:0006833);; Molecular Function: N-acetyltransferase activity (GO:0008080);; Cellular Component: chloroplast (GO:0009507);; Biological Process: response to salt stress (GO:0009651);; Biological Process: indoleacetic acid biosynthetic process (GO:0009684);; Biological Process: response to fructose…	--	--	N-acetyltransferase, putative [Ricinus communis]
comp12595_c0	2	p1	(T)11	11	2295	2305	[KR]	--	Biological Process: tryptophan catabolic process (GO:0006569);; Biological Process: water transport (GO:0006833);; Molecular Function: N-acetyltransferase activity (GO:0008080);; Cellular Component: chloroplast (GO:0009507);; Biological Process: response to salt stress (GO:0009651);; Biological Process: indoleacetic acid biosynthetic process (GO:0009684);; Biological Process: response to fructose…	--	--	N-acetyltransferase, putative [Ricinus communis]
comp12597_c0	2	p1	(T)20	20	926	945	--	--	--	--	--	PREDICTED: uncharacterized protein LOC100245192 [Vitis vinifera]
comp12597_c0	1	p3	(TCG)5	15	467	481	--	--	--	--	--	PREDICTED: uncharacterized protein LOC100245192 [Vitis vinifera]
comp12598_c0	1	p2	(TC)9	18	1	18	#N/A	#N/A	#N/A	#N/A	#N/A	#N/A
comp1260_c0	1	p2	(GA)6	12	1096	1107	[O]	Posttranslational modification, protein turnover, chaperones	Molecular Function: threonine-type endopeptidase activity (GO:0004298);; Cellular Component: nucleus (GO:0005634);; Cellular Component: proteasome core complex (GO:0005839);; Cellular Component: plasma membrane (GO:0005886);; Biological Process: ubiquitin-dependent protein catabolic process (GO:0006511);; Cellular Component: cytoplasmic membrane-bounded vesicle (GO:0016023);;	K02735|1e-134|sbi:SORBI_04g005590|hypothetical protein	Proteasome subunit beta type-3 OS=Oryza sativa subsp. japonica GN=PBC1 PE=2 SV=1	PREDICTED: proteasome subunit beta type-3-like [Brachypodium distachyon]
comp1260_c1	1	p3	(TCC)6	18	2746	2763	--	--	--	--	Zinc finger CCCH domain-containing protein 36 OS=Oryza sativa subsp. japonica GN=Os05g0497500 PE=2 SV=1	hypothetical protein PRUPE_ppa002526mg [Prunus persica]
comp12608_c0	1	p2	(TA)10	20	894	913	[R]	General function prediction only	Molecular Function: chitinase activity (GO:0004568);; Cellular Component: cell wall (GO:0005618);; Biological Process: carbohydrate metabolic process (GO:0005975);; Biological Process: chitin catabolic process (GO:0006032);; Biological Process: amino acid transport (GO:0006865);; Biological Process: response to nitrate (GO:0010167);; Biological Process: nitrate transport (GO:0015706);; Biological…	--	Chitinase 10 OS=Oryza sativa subsp. japonica GN=Cht10 PE=2 SV=1	class II chitinase, partial [Elaeis guineensis]
comp12609_c0	1	c	(AG)7---(AG)6	61	561	621	--	--	Molecular Function: protein kinase activity (GO:0004672);;	--	WAS/WASL-interacting protein family member 2 OS=Mus musculus GN=Wipf2 PE=2 SV=1	conserved hypothetical protein [Sporisorium reilianum SRZ2]
comp12610_c0	1	p3	(GCG)5	15	16	30	[H]	Coenzyme transport and metabolism	Cellular Component: plasma membrane (GO:0005886);; Cellular Component: chloroplast (GO:0009507);; Biological Process: photosynthetic electron transport in photosystem II (GO:0009772);; Biological Process: stomatal complex morphogenesis (GO:0010103);; Biological Process: photosystem II assembly (GO:0010207);; Biological Process: plastoquinone biosynthetic process (GO:0010236);; Cellular Component:…	K02548|3e-41|vvi:100256517|hypothetical protein LOC100256517	1,4-dihydroxy-2-naphthoate polyprenyltransferase, chloroplastic OS=Arabidopsis thaliana GN=ABC4 PE=1 SV=2	UbiA prenyltransferase family protein [Theobroma cacao]
comp12613_c0	1	p3	(CTC)5	15	678	692	--	--	Molecular Function: sequence-specific DNA binding transcription factor activity (GO:0003700);; Molecular Function: protein binding (GO:0005515);; Cellular Component: nucleus (GO:0005634);; Biological Process: regulation of transcription, DNA-templated (GO:0006355);; Biological Process: response to xenobiotic stimulus (GO:0009410);; Biological Process: response to red or far red light (GO:0009639)…	--	Transcription factor HY5-like OS=Arabidopsis thaliana GN=HYH PE=1 SV=1	hypothetical protein PRUPE_ppa011967mg [Prunus persica]
comp12619_c0	1	p1	(A)12	12	154	165	#N/A	#N/A	#N/A	#N/A	#N/A	#N/A
comp12622_c0	1	p1	(T)10	10	736	745	#N/A	#N/A	#N/A	#N/A	#N/A	#N/A
comp12627_c0	1	p3	(CTC)5	15	127	141	#N/A	#N/A	#N/A	#N/A	#N/A	#N/A
comp12627_c1	1	p2	(TC)7	14	1756	1769	--	--	Molecular Function: carbon-oxygen lyase activity, acting on phosphates (GO:0016838);;	--	Alpha-humulene synthase OS=Zingiber zerumbet GN=ZSS1 PE=1 SV=1	sesquiterpene synthase [Elaeis oleifera]
comp12629_c0	1	p3	(ATA)7	21	80	100	--	--	--	--	--	PREDICTED: uncharacterized protein LOC100260268 [Vitis vinifera]
comp12635_c0	1	c	(GCA)7---(GTC)6	137	1	137	#N/A	#N/A	#N/A	#N/A	#N/A	#N/A
comp12640_c0	1	p1	(T)15	15	1	15	--	--	Biological Process: RNA splicing, via endonucleolytic cleavage and ligation (GO:0000394);; Molecular Function: microtubule motor activity (GO:0003777);; Molecular Function: ATP binding (GO:0005524);; Cellular Component: cytoplasm (GO:0005737);; Cellular Component: kinesin complex (GO:0005871);; Cellular Component: microtubule (GO:0005874);; Biological Process: microtubule-based movement (GO:00070…	K10395|0.0|rcu:RCOM_1589540|Kinesin heavy chain, putative	Chromosome-associated kinesin KIF4A OS=Homo sapiens GN=KIF4A PE=1 SV=3	Kinesin heavy chain, putative [Ricinus communis]
comp12641_c0	1	p1	(T)10	10	648	657	--	--	--	--	--	PREDICTED: uncharacterized protein LOC100833502 [Brachypodium distachyon]
comp12643_c0	1	p1	(A)22	22	1	22	--	--	--	--	--	hypothetical protein M569_16225, partial [Genlisea aurea]
comp12643_c0	2	p1	(A)11	11	1542	1552	--	--	--	--	--	hypothetical protein M569_16225, partial [Genlisea aurea]
comp12645_c0	1	p2	(AG)8	16	1	16	[D]	Cell cycle control, cell division, chromosome partitioning	--	--	Translation initiation factor IF-2 OS=Kineococcus radiotolerans (strain ATCC BAA-149 / DSM 14245 / SRS30216) GN=infB PE=3 SV=1	PREDICTED: uncharacterized protein LOC101784897 [Setaria italica]
comp12646_c0	1	p2	(AG)8	16	538	553	--	--	Biological Process: glucose metabolic process (GO:0006006);; Biological Process: oxidation-reduction process (GO:0055114);;	K00036|2e-27|pop:POPTR_554745|glucose-6-phosphate 1-dehydrogenase (EC:1.1.1.49)	Glucose-6-phosphate 1-dehydrogenase, chloroplastic OS=Nicotiana tabacum PE=2 SV=1	hypothetical protein PRUPE_ppa015545mg [Prunus persica]
comp12647_c0	1	p3	(CTC)5	15	118	132	--	--	Molecular Function: structural constituent of ribosome (GO:0003735);; Cellular Component: ribosome (GO:0005840);; Biological Process: translation (GO:0006412);; Molecular Function: rRNA binding (GO:0019843);;	K02990|2e-24|pop:POPTR_262842|hypothetical protein	--	predicted protein [Populus trichocarpa]
comp12650_c0	1	c	(GCT)7---(GCT)5	78	1	78	--	--	Molecular Function: DNA binding (GO:0003677);; Biological Process: regulation of transcription, DNA-templated (GO:0006355);;	--	ZF-HD homeobox protein At5g65410 OS=Arabidopsis thaliana GN=At5g65410 PE=1 SV=1	PREDICTED: uncharacterized protein LOC101298828 [Fragaria vesca subsp. vesca]
comp12650_c0	2	p3	(GCC)6	18	1682	1699	--	--	Molecular Function: DNA binding (GO:0003677);; Biological Process: regulation of transcription, DNA-templated (GO:0006355);;	--	ZF-HD homeobox protein At5g65410 OS=Arabidopsis thaliana GN=At5g65410 PE=1 SV=1	PREDICTED: uncharacterized protein LOC101298828 [Fragaria vesca subsp. vesca]
comp12651_c0	1	c	(TCC)6---(TCT)6---(AG)8	158	1	158	--	--	Molecular Function: RNA binding (GO:0003723);; Cellular Component: extracellular space (GO:0005615);; Cellular Component: cell wall (GO:0005618);; Cellular Component: plasma membrane (GO:0005886);; Biological Process: aging (GO:0007568);; Biological Process: response to wounding (GO:0009611);; Biological Process: response to salt stress (GO:0009651);; Biological Process: anthocyanin-containing co…	--	Extracellular ribonuclease LE OS=Solanum lycopersicum PE=1 SV=2	predicted protein [Populus trichocarpa]
comp12653_c0	1	p2	(GA)10	20	1	20	#N/A	#N/A	#N/A	#N/A	#N/A	#N/A
comp1266_c0	1	p1	(A)13	13	79	91	--	--	Cellular Component: mitochondrion (GO:0005739);; Molecular Function: metal ion binding (GO:0046872);; Molecular Function: organic cyclic compound binding (GO:0097159);; Molecular Function: heterocyclic compound binding (GO:1901363);;	K12896|1e-107|vvi:100251921|hypothetical protein LOC100251921	Serine/arginine-rich splicing factor RS2Z33 OS=Arabidopsis thaliana GN=RS2Z33 PE=1 SV=1	PREDICTED: uncharacterized protein LOC100251921 [Vitis vinifera]
comp1266_c0	2	p3	(CCT)6	18	974	991	--	--	Cellular Component: mitochondrion (GO:0005739);; Molecular Function: metal ion binding (GO:0046872);; Molecular Function: organic cyclic compound binding (GO:0097159);; Molecular Function: heterocyclic compound binding (GO:1901363);;	K12896|1e-107|vvi:100251921|hypothetical protein LOC100251921	Serine/arginine-rich splicing factor RS2Z33 OS=Arabidopsis thaliana GN=RS2Z33 PE=1 SV=1	PREDICTED: uncharacterized protein LOC100251921 [Vitis vinifera]
comp12665_c0	1	p1	(A)10	10	665	674	--	--	Biological Process: metabolic process (GO:0008152);; Molecular Function: O-acyltransferase activity (GO:0008374);; Biological Process: cellular process (GO:0009987);;	K13508|2e-77|vvi:100264200|hypothetical protein LOC100264200	Glycerol-3-phosphate acyltransferase 1 OS=Arabidopsis thaliana GN=GPAT1 PE=1 SV=1	unnamed protein product [Vitis vinifera]
comp1268_c0	1	p2	(GA)6	12	1576	1587	--	--	Biological Process: metabolic process (GO:0008152);;	--	Glucoamylase OS=Aspergillus oryzae (strain ATCC 42149 / RIB 40) GN=glaA PE=2 SV=2	unnamed protein product [Vitis vinifera]
comp12681_c0	1	p3	(CTG)5	15	860	874	--	--	Cellular Component: nucleus (GO:0005634);; Cellular Component: mitochondrion (GO:0005739);; Cellular Component: cytosol (GO:0005829);;	--	--	hypothetical protein CARUB_v10013132mg, partial [Capsella rubella]
comp12681_c0	2	p3	(ATG)6	18	1305	1322	--	--	Cellular Component: nucleus (GO:0005634);; Cellular Component: mitochondrion (GO:0005739);; Cellular Component: cytosol (GO:0005829);;	--	--	hypothetical protein CARUB_v10013132mg, partial [Capsella rubella]
comp12683_c0	1	p2	(TG)7	14	574	587	#N/A	#N/A	#N/A	#N/A	#N/A	#N/A
comp12687_c0	1	p3	(AGA)5	15	1569	1583	[S]	Function unknown	Cellular Component: plasma membrane (GO:0005886);;	--	TVP38/TMEM64 family membrane protein slr0305 OS=Synechocystis sp. (strain PCC 6803 / Kazusa) GN=slr0305 PE=3 SV=1	SNARE associated Golgi protein family [Theobroma cacao]
comp1269_c0	1	p1	(C)10	10	214	223	[C]	Energy production and conversion	Molecular Function: citrate (Si)-synthase activity (GO:0004108);; Biological Process: glyoxylate cycle (GO:0006097);; Biological Process: tricarboxylic acid cycle (GO:0006099);; Biological Process: fatty acid beta-oxidation (GO:0006635);; Cellular Component: glyoxysome (GO:0009514);; Cellular Component: plastid (GO:0009536);;	K01647|0.0|vvi:100255795|similar to Citrate synthase, glyoxysomal	Citrate synthase, glyoxysomal OS=Cucurbita maxima PE=1 SV=1	PREDICTED: citrate synthase, glyoxysomal-like [Fragaria vesca subsp. vesca]
comp12692_c0	1	p2	(CT)7	14	58	71	[L]	Replication, recombination and repair	Molecular Function: double-stranded RNA binding (GO:0003725);; Molecular Function: ATP binding (GO:0005524);; Cellular Component: mitochondrion (GO:0005739);; Molecular Function: ATP-dependent helicase activity (GO:0008026);;	K14442|0.0|vvi:100251493|hypothetical protein LOC100251493	Probable ATP-dependent RNA helicase DHX36 OS=Mus musculus GN=Dhx36 PE=2 SV=2	unnamed protein product [Vitis vinifera]
comp12695_c0	1	p3	(TCT)5	15	73	87	--	--	Cellular Component: plant-type cell wall (GO:0009505);; Molecular Function: hydrolase activity (GO:0016787);;	--	Aspartic proteinase nepenthesin-1 OS=Nepenthes gracilis GN=nep1 PE=1 SV=1	Eukaryotic aspartyl protease family protein [Theobroma cacao]
comp1270_c0	1	c	(GA)10---(CTA)5	132	1	132	--	--	Molecular Function: copper ion binding (GO:0005507);; Molecular Function: calcium ion binding (GO:0005509);; Molecular Function: calmodulin binding (GO:0005516);; Molecular Function: phosphatidylinositol-4,5-bisphosphate binding (GO:0005546);; Molecular Function: phosphatidylinositol-3,4,5-trisphosphate binding (GO:0005547);; Cellular Component: vacuole (GO:0005773);; Cellular Component: cytoplas…	--	Plasma membrane-associated cation-binding protein 1 OS=Arabidopsis thaliana GN=PCAP1 PE=1 SV=1	endomembrane-associated protein, putative [Ricinus communis]
comp1270_c0	2	p3	(CCG)6	18	974	991	--	--	Molecular Function: copper ion binding (GO:0005507);; Molecular Function: calcium ion binding (GO:0005509);; Molecular Function: calmodulin binding (GO:0005516);; Molecular Function: phosphatidylinositol-4,5-bisphosphate binding (GO:0005546);; Molecular Function: phosphatidylinositol-3,4,5-trisphosphate binding (GO:0005547);; Cellular Component: vacuole (GO:0005773);; Cellular Component: cytoplas…	--	Plasma membrane-associated cation-binding protein 1 OS=Arabidopsis thaliana GN=PCAP1 PE=1 SV=1	endomembrane-associated protein, putative [Ricinus communis]
comp12703_c0	1	p3	(TGC)6	18	451	468	--	--	Cellular Component: intracellular membrane-bounded organelle (GO:0043231);;	--	Growth-regulating factor 4 OS=Oryza sativa subsp. japonica GN=GRF4 PE=2 SV=1	PREDICTED: uncharacterized protein LOC100259737 [Vitis vinifera]
comp12706_c0	1	p1	(T)20	20	1	20	[H]	Coenzyme transport and metabolism	Cellular Component: plastid (GO:0009536);; Cellular Component: membrane (GO:0016020);; Molecular Function: transferase activity (GO:0016740);; Biological Process: cellular biosynthetic process (GO:0044249);; Biological Process: small molecule metabolic process (GO:0044281);; Biological Process: organic substance biosynthetic process (GO:1901576);;	K02548|8e-57|vvi:100256517|hypothetical protein LOC100256517	1,4-dihydroxy-2-naphthoate polyprenyltransferase, chloroplastic OS=Arabidopsis thaliana GN=ABC4 PE=1 SV=2	unknown [Lotus japonicus]
comp12707_c0	1	p2	(TC)8	16	8	23	--	--	Molecular Function: protein binding (GO:0005515);; Biological Process: response to auxin (GO:0009733);; Molecular Function: sequence-specific DNA binding (GO:0043565);; Biological Process: positive regulation of transcription, DNA-templated (GO:0045893);;	--	Pathogenesis-related homeodomain protein OS=Arabidopsis thaliana GN=PRH PE=2 SV=1	PREDICTED: pathogenesis-related homeodomain protein-like [Cucumis sativus]
comp1271_c0	2	p1	(T)12	12	3999	4010	[LKJ]	--	Molecular Function: double-stranded DNA binding (GO:0003690);; Molecular Function: single-stranded DNA binding (GO:0003697);; Molecular Function: double-stranded RNA binding (GO:0003725);; Molecular Function: ATP-dependent RNA helicase activity (GO:0004004);; Molecular Function: ATP binding (GO:0005524);; Cellular Component: cell wall (GO:0005618);; Cellular Component: nucleolus (GO:0005730);; Ce…	--	DEAD-box ATP-dependent RNA helicase 56 OS=Arabidopsis thaliana GN=RH56 PE=2 SV=2	DEAD BOX RNA helicase RH15 - like protein [Arabidopsis thaliana]
comp1271_c0	1	p2	(TC)10	20	666	685	[LKJ]	--	Molecular Function: double-stranded DNA binding (GO:0003690);; Molecular Function: single-stranded DNA binding (GO:0003697);; Molecular Function: double-stranded RNA binding (GO:0003725);; Molecular Function: ATP-dependent RNA helicase activity (GO:0004004);; Molecular Function: ATP binding (GO:0005524);; Cellular Component: cell wall (GO:0005618);; Cellular Component: nucleolus (GO:0005730);; Ce…	--	DEAD-box ATP-dependent RNA helicase 56 OS=Arabidopsis thaliana GN=RH56 PE=2 SV=2	DEAD BOX RNA helicase RH15 - like protein [Arabidopsis thaliana]
comp1272_c0	1	p1	(A)14	14	2063	2076	[E]	Amino acid transport and metabolism	Biological Process: response to wounding (GO:0009611);; Biological Process: response to nematode (GO:0009624);; Biological Process: response to abscisic acid (GO:0009737);; Biological Process: response to salicylic acid (GO:0009751);; Biological Process: response to jasmonic acid (GO:0009753);; Cellular Component: membrane (GO:0016020);; Biological Process: hyperosmotic salinity response (GO:0042…	--	Peptide transporter PTR3-A OS=Arabidopsis thaliana GN=PTR3-A PE=2 SV=1	PREDICTED: peptide transporter PTR3-A [Vitis vinifera]
comp12720_c0	1	p3	(GAA)6	18	390	407	[RTKL]	--	Molecular Function: enzyme inhibitor activity (GO:0004857);; Biological Process: negative regulation of catalytic activity (GO:0043086);; Biological Process: response to karrikin (GO:0080167);;	--	Cell wall / vacuolar inhibitor of fructosidase 2 OS=Arabidopsis thaliana GN=C/VIF2 PE=1 SV=1	hypothetical protein ZEAMMB73_000869 [Zea mays]
comp12721_c0	1	p3	(AGA)6	18	11	28	[O]	Posttranslational modification, protein turnover, chaperones	Molecular Function: glutathione peroxidase activity (GO:0004602);; Cellular Component: mitochondrion (GO:0005739);; Cellular Component: endoplasmic reticulum (GO:0005783);; Cellular Component: cytosol (GO:0005829);; Cellular Component: plasma membrane (GO:0005886);; Biological Process: protein targeting to vacuole (GO:0006623);; Biological Process: response to oxidative stress (GO:0006979);; Biol…	K00432|2e-85|pop:POPTR_814377|PtrcGpx4	Probable glutathione peroxidase 5 OS=Arabidopsis thaliana GN=GPX5 PE=1 SV=1	hypothetical protein PRUPE_ppa012378mg [Prunus persica]
comp12728_c0	1	p3	(GGC)7	21	1	21	--	--	--	--	PH domain-containing protein YHR131C OS=Saccharomyces cerevisiae (strain ATCC 204508 / S288c) GN=YHR131C PE=1 SV=2	hypothetical protein GUITHDRAFT_109254 [Guillardia theta CCMP2712]
comp12730_c0	1	p1	(A)15	15	140	154	--	--	Biological Process: embryo sac egg cell differentiation (GO:0009560);;	--	Putative protein TPRXL OS=Homo sapiens GN=TPRXL PE=5 SV=2	unnamed protein product [Vitis vinifera]
comp12732_c0	1	c	(A)15---(TG)6	122	1	122	#N/A	#N/A	#N/A	#N/A	#N/A	#N/A
comp12732_c0	3	p1	(A)12	12	1781	1792	#N/A	#N/A	#N/A	#N/A	#N/A	#N/A
comp12732_c0	2	p2	(AC)8	16	1572	1587	#N/A	#N/A	#N/A	#N/A	#N/A	#N/A
comp12736_c0	1	p1	(A)12	12	90	101	--	--	Biological Process: transcription, DNA-templated (GO:0006351);; Biological Process: pollen development (GO:0009555);; Biological Process: anatomical structure morphogenesis (GO:0009653);; Biological Process: response to hormone (GO:0009725);; Biological Process: adventitious root development (GO:0048830);; Biological Process: regulation of cellular process (GO:0050794);;	--	Auxin response factor 17 OS=Arabidopsis thaliana GN=ARF17 PE=2 SV=1	predicted protein [Populus trichocarpa]
comp12738_c0	1	p3	(TGG)6	18	743	760	--	--	Biological Process: maltose metabolic process (GO:0000023);; Biological Process: pentose-phosphate shunt (GO:0006098);; Cellular Component: nitrite reductase complex [NAD(P)H] (GO:0009344);; Cellular Component: chloroplast thylakoid lumen (GO:0009543);; Cellular Component: photosystem II oxygen evolving complex (GO:0009654);; Biological Process: photosynthetic electron transport chain (GO:0009767…	K08901|4e-48|osa:4329766|Os02g0578400	PsbQ-like protein 1, chloroplastic OS=Arabidopsis thaliana GN=PQL1 PE=1 SV=1	oxygen evolving enhancer protein 3 [Zea mays]
comp12741_c0	1	p1	(A)14	14	796	809	#N/A	#N/A	#N/A	#N/A	#N/A	#N/A
comp12743_c0	1	p2	(TC)7	14	68	81	--	--	Cellular Component: nucleus (GO:0005634);; Biological Process: fatty acid beta-oxidation (GO:0006635);; Biological Process: autophagy (GO:0006914);; Biological Process: toxin catabolic process (GO:0009407);; Biological Process: proteasome-mediated ubiquitin-dependent protein catabolic process (GO:0043161);; Biological Process: defense response to fungus (GO:0050832);; Biological Process: response…	--	Autophagy-related protein 9 OS=Dictyostelium discoideum GN=atg9 PE=2 SV=1	PREDICTED: autophagy-related protein 9-like [Vitis vinifera]
comp12752_c0	1	p3	(CCT)7	21	3861	3881	[R]	General function prediction only	Biological Process: flower development (GO:0009908);; Molecular Function: histone-lysine N-methyltransferase activity (GO:0018024);; Biological Process: histone lysine methylation (GO:0034968);; Cellular Component: intracellular part (GO:0044424);; Molecular Function: metal ion binding (GO:0046872);; Biological Process: regulation of biological process (GO:0050789);;	--	Histone-lysine N-methyltransferase ATX2 OS=Arabidopsis thaliana GN=ATX2 PE=2 SV=1	phd finger protein, putative [Ricinus communis]
comp12761_c0	1	p3	(GCA)6	18	777	794	--	--	Molecular Function: fatty acid binding (GO:0005504);; Cellular Component: mitochondrion (GO:0005739);; Biological Process: fatty acid metabolic process (GO:0006631);; Cellular Component: chloroplast stroma (GO:0009570);; Cellular Component: chloroplast envelope (GO:0009941);; Molecular Function: intramolecular lyase activity (GO:0016872);;	--	Fatty-acid-binding protein 1 OS=Arabidopsis thaliana GN=FAP1 PE=1 SV=1	PREDICTED: uncharacterized protein LOC100785266 [Glycine max]
comp12765_c0	1	p2	(AT)10	20	1	20	#N/A	#N/A	#N/A	#N/A	#N/A	#N/A
comp12766_c0	1	p2	(AG)7	14	1	14	#N/A	#N/A	#N/A	#N/A	#N/A	#N/A
comp12770_c0	1	p1	(A)10	10	151	160	#N/A	#N/A	#N/A	#N/A	#N/A	#N/A
comp12770_c0	2	p1	(A)10	10	1345	1354	#N/A	#N/A	#N/A	#N/A	#N/A	#N/A
comp12771_c0	1	p3	(CCT)5	15	1150	1164	--	--	--	--	Transcription factor PIF4 OS=Arabidopsis thaliana GN=PIF4 PE=1 SV=1	PREDICTED: transcription factor PIF5-like [Vitis vinifera]
comp12773_c0	1	p1	(A)20	20	1	20	--	--	--	--	Putative protein TPRXL OS=Homo sapiens GN=TPRXL PE=5 SV=2	nucleic acid binding protein, putative [Ricinus communis]
comp12775_c0	1	p1	(A)12	12	638	649	[RTKL]	--	Molecular Function: protein serine/threonine kinase activity (GO:0004674);; Molecular Function: protein tyrosine kinase activity (GO:0004713);; Molecular Function: ATP binding (GO:0005524);; Biological Process: protein phosphorylation (GO:0006468);;	--	Serine/threonine-protein kinase Nek6 OS=Oryza sativa subsp. japonica GN=NEK6 PE=2 SV=2	Serine/threonine protein kinase Nek2 [Medicago truncatula]
comp12775_c0	2	p2	(AG)10	20	1299	1318	[RTKL]	--	Molecular Function: protein serine/threonine kinase activity (GO:0004674);; Molecular Function: protein tyrosine kinase activity (GO:0004713);; Molecular Function: ATP binding (GO:0005524);; Biological Process: protein phosphorylation (GO:0006468);;	--	Serine/threonine-protein kinase Nek6 OS=Oryza sativa subsp. japonica GN=NEK6 PE=2 SV=2	Serine/threonine protein kinase Nek2 [Medicago truncatula]
comp1278_c0	1	p2	(TC)7	14	1452	1465	--	--	Biological Process: defense response to insect (GO:0002213);; Molecular Function: stearoyl-CoA 9-desaturase activity (GO:0004768);; Biological Process: fatty acid biosynthetic process (GO:0006633);; Cellular Component: chloroplast stroma (GO:0009570);; Biological Process: defense response to bacterium (GO:0042742);; Molecular Function: acyl-[acyl-carrier-protein] desaturase activity (GO:0045300);…	K03921|0.0|vvi:100262293|hypothetical protein LOC100262293	Acyl-[acyl-carrier-protein] desaturase, chloroplastic OS=Elaeis guineensis var. tenera PE=2 SV=2	stearoyl-acyl-carrier protein desaturase [Pinellia ternata]
comp12781_c0	1	p3	(AAG)5	15	7	21	--	--	Cellular Component: plasma membrane (GO:0005886);; Cellular Component: cytoplasmic membrane-bounded vesicle (GO:0016023);;	--	--	PREDICTED: uncharacterized protein LOC101782671 [Setaria italica]
comp12785_c0	1	p1	(A)11	11	100	110	#N/A	#N/A	#N/A	#N/A	#N/A	#N/A
comp12785_c0	2	p1	(T)11	11	789	799	#N/A	#N/A	#N/A	#N/A	#N/A	#N/A
comp12788_c0	1	p3	(GGC)5	15	2364	2378	[L]	Replication, recombination and repair	Biological Process: single strand break repair (GO:0000012);; Molecular Function: DNA binding (GO:0003677);; Molecular Function: DNA ligase (ATP) activity (GO:0003910);; Molecular Function: ATP binding (GO:0005524);; Cellular Component: nucleus (GO:0005634);; Cellular Component: mitochondrion (GO:0005739);; Biological Process: DNA-dependent DNA replication (GO:0006261);; Biological Process: doubl…	K10747|0.0|sbi:SORBI_01g018700|hypothetical protein	DNA ligase 1 OS=Arabidopsis thaliana GN=LIG1 PE=2 SV=2	TPA: putative DNA ligase family protein [Zea mays]
comp1279_c1	1	p1	(A)10	10	360	369	--	--	Cellular Component: mitochondrial outer membrane translocase complex (GO:0005742);; Cellular Component: plastid (GO:0009536);; Biological Process: protein import into mitochondrial matrix (GO:0030150);;	--	Mitochondrial import receptor subunit TOM7-1 OS=Solanum tuberosum GN=TOM7-1 PE=3 SV=3	hypothetical protein MA4_54N07.44 [Musa acuminata]
comp12790_c0	1	p1	(T)14	14	1	14	#N/A	#N/A	#N/A	#N/A	#N/A	#N/A
comp12793_c0	1	p2	(AG)6	12	1082	1093	--	--	--	--	B3 domain-containing protein Os06g0194400 OS=Oryza sativa subsp. japonica GN=Os06g0194400 PE=2 SV=1	hypothetical protein SORBIDRAFT_07g006170 [Sorghum bicolor]
comp12795_c0	1	p1	(A)15	15	2	16	#N/A	#N/A	#N/A	#N/A	#N/A	#N/A
comp12801_c0	1	p1	(A)16	16	485	500	#N/A	#N/A	#N/A	#N/A	#N/A	#N/A
comp12804_c0	1	p1	(A)16	16	1	16	--	--	Cellular Component: mitochondrion (GO:0005739);;	--	--	PREDICTED: uncharacterized protein LOC100259142 [Vitis vinifera]
comp12804_c0	2	p1	(T)10	10	1878	1887	--	--	Cellular Component: mitochondrion (GO:0005739);;	--	--	PREDICTED: uncharacterized protein LOC100259142 [Vitis vinifera]
comp12805_c0	1	p3	(TTA)7	21	1	21	#N/A	#N/A	#N/A	#N/A	#N/A	#N/A
comp12806_c0	1	p2	(AG)7	14	749	762	--	--	--	--	Uncharacterized protein At5g05190 OS=Arabidopsis thaliana GN=Y-1 PE=1 SV=1	hypothetical protein OsI_07138 [Oryza sativa Indica Group]
comp12808_c0	1	p1	(A)10	10	1065	1074	--	--	--	--	--	hypothetical protein VITISV_010028 [Vitis vinifera]
comp12808_c0	2	p1	(T)11	11	1534	1544	--	--	--	--	--	hypothetical protein VITISV_010028 [Vitis vinifera]
comp1281_c0	1	p3	(GAG)6	18	2451	2468	[R]	General function prediction only	Cellular Component: endoplasmic reticulum (GO:0005783);; Biological Process: ER to Golgi vesicle-mediated transport (GO:0006888);; Cellular Component: membrane (GO:0016020);; Cellular Component: cytoplasmic membrane-bounded vesicle (GO:0016023);; Biological Process: ER-associated ubiquitin-dependent protein catabolic process (GO:0030433);; Biological Process: hyperosmotic salinity response (GO:00…	--	Protein sel-1 homolog 2 OS=Homo sapiens GN=SEL1L2 PE=1 SV=2	conserved hypothetical protein [Ricinus communis]
comp12814_c0	1	p2	(CT)9	18	96	113	--	--	--	--	Translation initiation factor IF-2 OS=Frankia sp. (strain EAN1pec) GN=infB PE=3 SV=1	predicted protein [Populus trichocarpa]
comp12820_c0	1	p1	(A)11	11	151	161	--	--	--	--	--	unnamed protein product [Vitis vinifera]
comp12820_c0	2	p3	(GCA)7	21	608	628	--	--	--	--	--	unnamed protein product [Vitis vinifera]
comp12831_c0	1	p2	(CT)7	14	325	338	--	--	--	--	RING-H2 finger protein ATL79 OS=Arabidopsis thaliana GN=ATL79 PE=2 SV=1	hypothetical protein SORBIDRAFT_04g000640 [Sorghum bicolor]
comp1284_c0	1	c	(AG)11---(GGT)5	58	1	58	[S]	Function unknown	--	--	Uncharacterized endoplasmic reticulum membrane protein C16E8.02 OS=Schizosaccharomyces pombe (strain 972 / ATCC 24843) GN=SPAC16E8.02 PE=4 SV=2	conserved hypothetical protein [Ricinus communis]
comp12840_c0	1	p1	(A)10	10	215	224	#N/A	#N/A	#N/A	#N/A	#N/A	#N/A
comp12841_c0	1	p2	(CT)7	14	1144	1157	--	--	--	--	Translation initiation factor IF-2 OS=Thermobifida fusca (strain YX) GN=infB PE=3 SV=1	PREDICTED: uncharacterized protein LOC100834184 [Brachypodium distachyon]
comp12844_c0	1	p1	(A)10	10	605	614	[D]	Cell cycle control, cell division, chromosome partitioning	Biological Process: regulation of cyclin-dependent protein serine/threonine kinase activity (GO:0000079);;	--	Cyclin-D1-1 OS=Arabidopsis thaliana GN=CYCD1-1 PE=1 SV=3	D1-type cyclin [Populus x canadensis]
comp12844_c0	2	p1	(A)12	12	722	733	[D]	Cell cycle control, cell division, chromosome partitioning	Biological Process: regulation of cyclin-dependent protein serine/threonine kinase activity (GO:0000079);;	--	Cyclin-D1-1 OS=Arabidopsis thaliana GN=CYCD1-1 PE=1 SV=3	D1-type cyclin [Populus x canadensis]
comp12847_c0	1	p3	(CAG)6	18	1756	1773	--	--	--	--	Pentatricopeptide repeat-containing protein At5g66500, mitochondrial OS=Arabidopsis thaliana GN=PCMP-E38 PE=2 SV=1	PREDICTED: pentatricopeptide repeat-containing protein At5g66500, mitochondrial-like, partial [Vitis vinifera]
comp12848_c0	1	p1	(A)12	12	92	103	[J]	Translation, ribosomal structure and biogenesis	Molecular Function: RNA binding (GO:0003723);; Molecular Function: structural constituent of ribosome (GO:0003735);; Cellular Component: ribosome (GO:0005840);; Biological Process: translation (GO:0006412);; Cellular Component: nucleoid (GO:0009295);; Cellular Component: chloroplast thylakoid membrane (GO:0009535);; Cellular Component: chloroplast stroma (GO:0009570);; Biological Process: defense…	K02935|7e-39|vvi:100257626|hypothetical protein LOC100257626	50S ribosomal protein L12, chloroplastic OS=Nicotiana tabacum GN=RPL12 PE=1 SV=1	PREDICTED: 50S ribosomal protein L12, chloroplastic-like [Glycine max]
comp12849_c0	1	p3	(TCC)6	18	1733	1750	--	--	Molecular Function: core promoter proximal region sequence-specific DNA binding (GO:0000987);; Cellular Component: nucleus (GO:0005634);; Biological Process: regulation of transcription, DNA-templated (GO:0006355);; Biological Process: protein targeting to mitochondrion (GO:0006626);; Biological Process: cell surface receptor signaling pathway (GO:0007166);; Cellular Component: plastid (GO:000953…	--	F-box protein At5g06550 OS=Arabidopsis thaliana GN=At5g06550 PE=2 SV=1	Transferase, transferring glycosyl groups, putative [Theobroma cacao]
comp12850_c0	1	p1	(A)14	14	1	14	--	--	--	--	Putative ribonuclease H protein At1g65750 OS=Arabidopsis thaliana GN=At1g65750 PE=3 SV=1	hypothetical protein VITISV_000894 [Vitis vinifera]
comp12850_c0	2	p1	(A)10	10	1800	1809	--	--	--	--	Putative ribonuclease H protein At1g65750 OS=Arabidopsis thaliana GN=At1g65750 PE=3 SV=1	hypothetical protein VITISV_000894 [Vitis vinifera]
comp12853_c0	1	p2	(TC)10	20	907	926	[KR]	--	Molecular Function: transferase activity (GO:0016740);;	--	N-alpha-acetyltransferase 40 OS=Danio rerio GN=naa40 PE=2 SV=1	unknown [Picea sitchensis]
comp12866_c0	1	p2	(AG)7	14	246	259	[Q]	Secondary metabolites biosynthesis, transport and catabolism	Molecular Function: copper ion binding (GO:0005507);; Cellular Component: extracellular region (GO:0005576);; Molecular Function: L-ascorbate oxidase activity (GO:0008447);; Biological Process: systemic acquired resistance (GO:0009627);; Biological Process: salicylic acid biosynthetic process (GO:0009697);; Biological Process: sterol biosynthetic process (GO:0016126);; Biological Process: sphingo…	--	L-ascorbate oxidase OS=Cucumis sativus PE=1 SV=1	hypothetical protein PRUPE_ppa003375mg [Prunus persica]
comp12866_c0	2	p2	(CT)8	16	1993	2008	[Q]	Secondary metabolites biosynthesis, transport and catabolism	Molecular Function: copper ion binding (GO:0005507);; Cellular Component: extracellular region (GO:0005576);; Molecular Function: L-ascorbate oxidase activity (GO:0008447);; Biological Process: systemic acquired resistance (GO:0009627);; Biological Process: salicylic acid biosynthetic process (GO:0009697);; Biological Process: sterol biosynthetic process (GO:0016126);; Biological Process: sphingo…	--	L-ascorbate oxidase OS=Cucumis sativus PE=1 SV=1	hypothetical protein PRUPE_ppa003375mg [Prunus persica]
comp12871_c0	1	p1	(T)15	15	9	23	--	--	Cellular Component: mitochondrion (GO:0005739);; Cellular Component: chloroplast envelope (GO:0009941);; Biological Process: response to UV-B (GO:0010224);; Biological Process: developmental process (GO:0032502);;	--	UPF0420 protein C16orf58 homolog OS=Mus musculus PE=2 SV=1	OSJNBb0096E05.17 [Oryza sativa Japonica Group]
comp12872_c0	1	p3	(GAA)5	15	9	23	--	--	Cellular Component: Golgi apparatus (GO:0005794);; Molecular Function: methyltransferase activity (GO:0008168);; Biological Process: methylation (GO:0032259);;	--	Mucin-19 OS=Mus musculus GN=Muc19 PE=2 SV=2	predicted protein [Populus trichocarpa]
comp12873_c0	1	p1	(T)14	14	809	822	--	--	Molecular Function: RNA binding (GO:0003723);; Cellular Component: chloroplast thylakoid membrane (GO:0009535);; Cellular Component: chloroplast stroma (GO:0009570);; Biological Process: response to wounding (GO:0009611);; Cellular Component: chloroplast envelope (GO:0009941);; Biological Process: myo-inositol hexakisphosphate biosynthetic process (GO:0010264);; Biological Process: photosynthesis…	--	--	hypothetical protein TCM_039852 [Theobroma cacao]
comp12880_c0	1	p3	(TCC)6	18	982	999	--	--	--	--	Translation initiation factor IF-2 OS=Frankia sp. (strain CcI3) GN=infB PE=3 SV=1	PREDICTED: uncharacterized protein LOC100263384 [Vitis vinifera]
comp12881_c0	1	p2	(AG)9	18	5	22	--	--	--	--	--	A-kinase anchor protein 9, putative isoform 1 [Theobroma cacao]
comp12884_c0	1	p2	(GA)9	18	1	18	--	--	--	--	--	hypothetical protein MTR_2g044960 [Medicago truncatula]
comp12889_c0	1	p1	(A)10	10	381	390	--	--	--	--	F-box protein SKIP23 OS=Arabidopsis thaliana GN=SKIP23 PE=1 SV=1	PREDICTED: F-box protein SKIP23-like [Vitis vinifera]
comp1289_c0	1	p2	(TC)6	12	1413	1424	[MG]	--	Molecular Function: oxidoreductase activity (GO:0016491);; Biological Process: single-organism metabolic process (GO:0044710);;	--	Gibberellin-regulated protein 6 OS=Arabidopsis thaliana GN=GASA6 PE=2 SV=1	unknown [Zea mays]
comp12895_c0	1	p3	(GGA)5	15	160	174	--	--	Biological Process: nuclear-transcribed mRNA catabolic process (GO:0000956);; Molecular Function: damaged DNA binding (GO:0003684);; Molecular Function: ATP binding (GO:0005524);; Biological Process: mismatch repair (GO:0006298);; Biological Process: myo-inositol hexakisphosphate biosynthetic process (GO:0010264);; Molecular Function: kinase activity (GO:0016301);; Biological Process: phosphoryla…	--	--	protein similar to Arabidopsis pfkB family of carbohydrate kinases At5g58730 [Saccharum hybrid cultivar R570]
comp12898_c0	1	p2	(TC)7	14	50	63	[R]	General function prediction only	--	K03363|2e-33|zma:100384140|hypothetical protein LOC100384140	Anaphase-promoting complex subunit cdc20 OS=Dictyostelium discoideum GN=cdc20 PE=1 SV=1	hypothetical protein [Zea mays]
comp12898_c0	2	p3	(GGA)5	15	238	252	[R]	General function prediction only	--	K03363|2e-33|zma:100384140|hypothetical protein LOC100384140	Anaphase-promoting complex subunit cdc20 OS=Dictyostelium discoideum GN=cdc20 PE=1 SV=1	hypothetical protein [Zea mays]
comp129_c0	1	p2	(TA)6	12	465	476	[O]	Posttranslational modification, protein turnover, chaperones	Molecular Function: ubiquitin-protein ligase activity (GO:0004842);; Molecular Function: ATP binding (GO:0005524);; Cellular Component: nucleus (GO:0005634);; Cellular Component: cytoplasm (GO:0005737);; Cellular Component: plasma membrane (GO:0005886);; Biological Process: ubiquitin-dependent protein catabolic process (GO:0006511);; Biological Process: protein ubiquitination (GO:0016567);;	K06689|1e-105|pop:POPTR_738992|hypothetical protein	Ubiquitin-conjugating enzyme E2-17 kDa OS=Solanum lycopersicum PE=2 SV=1	PREDICTED: ubiquitin-conjugating enzyme E2-17 kDa-like [Fragaria vesca subsp. vesca]
comp12900_c0	1	p1	(C)10	10	269	278	--	--	--	--	Remorin OS=Solanum tuberosum PE=1 SV=1	PREDICTED: uncharacterized protein LOC100251322 isoform 1 [Vitis vinifera]
comp12901_c0	1	p2	(TG)7	14	354	367	#N/A	#N/A	#N/A	#N/A	#N/A	#N/A
comp12903_c0	1	p1	(T)15	15	1278	1292	[D]	Cell cycle control, cell division, chromosome partitioning	Biological Process: microtubule cytoskeleton organization (GO:0000226);; Biological Process: cytokinesis (GO:0000910);; Cellular Component: cytoplasm (GO:0005737);; Biological Process: tubulin complex assembly (GO:0007021);;	--	Tubulin-folding cofactor C OS=Arabidopsis thaliana GN=POR PE=1 SV=1	PREDICTED: tubulin-specific chaperone C-like [Vitis vinifera]
comp12908_c0	1	p1	(A)14	14	506	519	--	--	Molecular Function: nucleotide binding (GO:0000166);; Molecular Function: 3-beta-hydroxy-delta5-steroid dehydrogenase activity (GO:0003854);; Cellular Component: nucleus (GO:0005634);; Biological Process: steroid biosynthetic process (GO:0006694);; Biological Process: response to sucrose (GO:0009744);; Biological Process: lignin biosynthetic process (GO:0009809);; Biological Process: flavonoid bi…	--	--	predicted protein [Populus trichocarpa]
comp12917_c0	1	p1	(T)13	13	264	276	#N/A	#N/A	#N/A	#N/A	#N/A	#N/A
comp12918_c0	2	p1	(T)11	11	1153	1163	[I]	Lipid transport and metabolism	Molecular Function: catalytic activity (GO:0003824);; Biological Process: metabolic process (GO:0008152);;	--	Mucin-5AC (Fragments) OS=Homo sapiens GN=MUC5AC PE=1 SV=3	PREDICTED: carnitinyl-CoA dehydratase-like [Brachypodium distachyon]
comp12918_c0	1	p3	(CGG)6	18	581	598	[I]	Lipid transport and metabolism	Molecular Function: catalytic activity (GO:0003824);; Biological Process: metabolic process (GO:0008152);;	--	Mucin-5AC (Fragments) OS=Homo sapiens GN=MUC5AC PE=1 SV=3	PREDICTED: carnitinyl-CoA dehydratase-like [Brachypodium distachyon]
comp1292_c0	1	p2	(GA)7	14	232	245	[LKJ]	--	Molecular Function: helicase activity (GO:0004386);; Biological Process: response to heat (GO:0009408);; Biological Process: cellular process (GO:0009987);; Biological Process: protein metabolic process (GO:0019538);; Molecular Function: ATPase activity, coupled (GO:0042623);; Cellular Component: intracellular part (GO:0044424);; Molecular Function: organic cyclic compound binding (GO:0097159);; …	--	DEAD-box ATP-dependent RNA helicase 38 OS=Oryza sativa subsp. japonica GN=Os03g0158200 PE=2 SV=1	RNA helicase-like protein [Gossypium hirsutum]
comp1292_c0	2	p2	(GA)9	18	2355	2372	[LKJ]	--	Molecular Function: helicase activity (GO:0004386);; Biological Process: response to heat (GO:0009408);; Biological Process: cellular process (GO:0009987);; Biological Process: protein metabolic process (GO:0019538);; Molecular Function: ATPase activity, coupled (GO:0042623);; Cellular Component: intracellular part (GO:0044424);; Molecular Function: organic cyclic compound binding (GO:0097159);; …	--	DEAD-box ATP-dependent RNA helicase 38 OS=Oryza sativa subsp. japonica GN=Os03g0158200 PE=2 SV=1	RNA helicase-like protein [Gossypium hirsutum]
comp12920_c0	1	p1	(A)10	10	220	229	--	--	Biological Process: response to stress (GO:0006950);;	--	Proline-rich receptor-like protein kinase PERK8 OS=Arabidopsis thaliana GN=PERK8 PE=1 SV=1	PREDICTED: uncharacterized protein LOC101243648 [Solanum lycopersicum]
comp12924_c0	1	p3	(CTG)5	15	73	87	--	--	Cellular Component: mitochondrion (GO:0005739);;	--	--	predicted protein [Populus trichocarpa]
comp12927_c0	1	p2	(AG)9	18	7	24	--	--	--	--	--	AGL354Cp [Ashbya gossypii ATCC 10895]
comp1293_c1	1	p1	(A)16	16	189	204	--	--	--	--	Zinc finger CCCH domain-containing protein 2 OS=Oryza sativa subsp. japonica GN=Os01g0192000 PE=2 SV=1	PREDICTED: zinc finger CCCH domain-containing protein 20 [Vitis vinifera]
comp1293_c1	2	p1	(T)11	11	1667	1677	--	--	--	--	Zinc finger CCCH domain-containing protein 2 OS=Oryza sativa subsp. japonica GN=Os01g0192000 PE=2 SV=1	PREDICTED: zinc finger CCCH domain-containing protein 20 [Vitis vinifera]
comp12931_c0	1	p1	(A)13	13	1	13	#N/A	#N/A	#N/A	#N/A	#N/A	#N/A
comp12934_c0	1	p2	(CG)6	12	8	19	#N/A	#N/A	#N/A	#N/A	#N/A	#N/A
comp12936_c0	1	p5	(TGCCA)5	25	413	437	--	--	--	--	Leucine-rich repeat extensin-like protein 3 OS=Arabidopsis thaliana GN=LRX3 PE=1 SV=1	predicted protein [Hordeum vulgare subsp. vulgare]
comp12937_c0	1	p3	(GGA)5	15	297	311	--	--	Cellular Component: mitochondrion (GO:0005739);; Cellular Component: chloroplast (GO:0009507);; Cellular Component: membrane (GO:0016020);;	--	Uncharacterized protein ycf36 OS=Porphyra purpurea GN=ycf36 PE=3 SV=1	hypothetical protein SORBIDRAFT_01g031850 [Sorghum bicolor]
comp1294_c0	1	p2	(AG)8	16	2018	2033	[U]	Intracellular trafficking, secretion, and vesicular transport	Molecular Function: binding (GO:0005488);; Biological Process: cellular metabolic process (GO:0044237);; Biological Process: primary metabolic process (GO:0044238);; Cellular Component: intracellular part (GO:0044424);; Biological Process: organic substance metabolic process (GO:0071704);;	K12486|1e-179|vvi:100262374|hypothetical protein LOC100262374	Probable ADP-ribosylation factor GTPase-activating protein AGD5 OS=Arabidopsis thaliana GN=AGD5 PE=1 SV=1	PREDICTED: probable ADP-ribosylation factor GTPase-activating protein AGD5-like isoform 1 [Vitis vinifera]
comp12940_c0	2	p1	(T)13	13	1260	1272	#N/A	#N/A	#N/A	#N/A	#N/A	#N/A
comp12940_c0	1	p2	(AG)9	18	1	18	#N/A	#N/A	#N/A	#N/A	#N/A	#N/A
comp12941_c0	1	p1	(T)12	12	1454	1465	[G]	Carbohydrate transport and metabolism	Molecular Function: protein histidine kinase activity (GO:0004673);; Molecular Function: ATP binding (GO:0005524);; Cellular Component: mitochondrion (GO:0005739);; Biological Process: starch catabolic process (GO:0005983);; Biological Process: circadian rhythm (GO:0007623);; Cellular Component: chloroplast stroma (GO:0009570);; Biological Process: response to symbiotic fungus (GO:0009610);; Biol…	--	Alpha-glucan water dikinase, chloroplastic OS=Citrus reticulata GN=R1 PE=2 SV=1	hypothetical protein PRUPE_ppa000345mg [Prunus persica]
comp12942_c0	1	p2	(TC)9	18	1	18	#N/A	#N/A	#N/A	#N/A	#N/A	#N/A
comp12943_c0	1	p1	(A)22	22	2204	2225	#N/A	#N/A	#N/A	#N/A	#N/A	#N/A
comp12946_c0	1	c	(AG)6---(AT)6---(T)13	121	106	226	#N/A	#N/A	#N/A	#N/A	#N/A	#N/A
comp1295_c0	1	p1	(T)11	11	16	26	--	--	Biological Process: maltose metabolic process (GO:0000023);; Biological Process: rRNA processing (GO:0006364);; Cellular Component: PSII associated light-harvesting complex II (GO:0009517);; Cellular Component: photosystem II (GO:0009523);; Biological Process: thylakoid membrane organization (GO:0010027);; Biological Process: stomatal complex morphogenesis (GO:0010103);; Biological Process: nonph…	K03542|1e-134|rcu:RCOM_1030930|Photosystem II 22 kDa protein, chloroplast precursor, putative	Photosystem II 22 kDa protein, chloroplastic OS=Solanum sogarandinum GN=PSBS PE=2 SV=1	Photosystem II 22 kDa protein, chloroplast precursor, putative [Ricinus communis]
comp12950_c0	1	p3	(CAG)5	15	381	395	--	--	Molecular Function: binding (GO:0005488);;	--	--	Indeterminate(ID)-domain 5, putative isoform 1 [Theobroma cacao]
comp12952_c0	1	p2	(TC)9	18	1	18	--	--	Molecular Function: protein serine/threonine kinase activity (GO:0004674);; Molecular Function: ATP binding (GO:0005524);; Cellular Component: plasma membrane (GO:0005886);; Biological Process: protein phosphorylation (GO:0006468);; Biological Process: protein N-linked glycosylation (GO:0006487);; Molecular Function: carbohydrate binding (GO:0030246);; Biological Process: recognition of pollen (G…	--	G-type lectin S-receptor-like serine/threonine-protein kinase At1g34300 OS=Arabidopsis thaliana GN=At1g34300 PE=1 SV=1	PREDICTED: G-type lectin S-receptor-like serine/threonine-protein kinase At1g34300-like [Setaria italica]
comp12959_c0	1	p3	(CGC)5	15	458	472	--	--	--	--	Basic proline-rich protein OS=Sus scrofa PE=1 SV=2	Uncharacterized protein isoform 2 [Theobroma cacao]
comp12967_c0	1	p1	(A)13	13	2094	2106	--	--	Biological Process: DNA replication (GO:0006260);; Biological Process: regulation of gene expression (GO:0010468);; Biological Process: single-organism cellular process (GO:0044763);; Biological Process: regulation of cellular process (GO:0050794);;	K03504|1e-138|vvi:100250468|hypothetical protein LOC100250468	DNA polymerase delta subunit 3 OS=Homo sapiens GN=POLD3 PE=1 SV=2	hypothetical protein PRUPE_ppa003898mg [Prunus persica]
comp1297_c0	1	p2	(CT)9	18	125	142	[R]	General function prediction only	Molecular Function: carbonate dehydratase activity (GO:0004089);; Cellular Component: mitochondrial respiratory chain complex I (GO:0005747);; Biological Process: pentose-phosphate shunt (GO:0006098);; Biological Process: ubiquitin-dependent protein catabolic process (GO:0006511);; Biological Process: response to salt stress (GO:0009651);; Biological Process: photorespiration (GO:0009853);; Molec…	--	Gamma carbonic anhydrase 1, mitochondrial OS=Arabidopsis thaliana GN=GAMMACA1 PE=1 SV=1	PREDICTED: gamma carbonic anhydrase 1, mitochondrial-like [Cucumis sativus]
comp12972_c0	1	p2	(AG)6	12	65	76	--	--	--	--	--	hypothetical protein PRUPE_ppa013271mg [Prunus persica]
comp12973_c0	1	p2	(CA)6	12	1	12	#N/A	#N/A	#N/A	#N/A	#N/A	#N/A
comp12974_c0	1	p2	(TC)10	20	1	20	--	--	Biological Process: regionalization (GO:0003002);; Cellular Component: nucleus (GO:0005634);; Biological Process: transcription, DNA-templated (GO:0006351);; Biological Process: regulation of flower development (GO:0009909);; Biological Process: response to chitin (GO:0010200);; Biological Process: negative regulation of organ growth (GO:0046621);; Biological Process: sepal development (GO:004844…	--	Trihelix transcription factor PTL OS=Arabidopsis thaliana GN=PTL PE=2 SV=1	PREDICTED: trihelix transcription factor GT-2-like [Vitis vinifera]
comp12976_c0	1	c	(T)11(G)12	23	1	23	#N/A	#N/A	#N/A	#N/A	#N/A	#N/A
comp1299_c0	1	p2	(GA)11	22	1156	1177	--	--	--	--	--	hypothetical protein PRUPE_ppa004220mg [Prunus persica]
comp12995_c0	1	p1	(A)12	12	156	167	[J]	Translation, ribosomal structure and biogenesis	Molecular Function: methionine-tRNA ligase activity (GO:0004825);; Molecular Function: ATP binding (GO:0005524);; Cellular Component: mitochondrion (GO:0005739);; Biological Process: methionyl-tRNA aminoacylation (GO:0006431);; Cellular Component: chloroplast stroma (GO:0009570);; Biological Process: ovule development (GO:0048481);;	K01874|0.0|pop:POPTR_1092152|hypothetical protein	Methionine--tRNA ligase OS=Synechocystis sp. (strain PCC 6803 / Kazusa) GN=metG PE=3 SV=1	PREDICTED: methionyl-tRNA synthetase-like [Vitis vinifera]
comp13_c0	2	c	(A)10---(A)10	31	2896	2926	--	--	Cellular Component: plastid (GO:0009536);;	--	Putative membrane protein ycf1 OS=Lemna minor GN=ycf1 PE=3 SV=1	hypothetical chloroplast RF19 (chloroplast) [Spirodela polyrhiza]
comp13_c0	1	p1	(A)12	12	1499	1510	--	--	Cellular Component: plastid (GO:0009536);;	--	Putative membrane protein ycf1 OS=Lemna minor GN=ycf1 PE=3 SV=1	hypothetical chloroplast RF19 (chloroplast) [Spirodela polyrhiza]
comp13_c0	3	p1	(A)11	11	3036	3046	--	--	Cellular Component: plastid (GO:0009536);;	--	Putative membrane protein ycf1 OS=Lemna minor GN=ycf1 PE=3 SV=1	hypothetical chloroplast RF19 (chloroplast) [Spirodela polyrhiza]
comp13_c0	4	p1	(A)11	11	3258	3268	--	--	Cellular Component: plastid (GO:0009536);;	--	Putative membrane protein ycf1 OS=Lemna minor GN=ycf1 PE=3 SV=1	hypothetical chloroplast RF19 (chloroplast) [Spirodela polyrhiza]
comp13_c0	5	p1	(A)13	13	4657	4669	--	--	Cellular Component: plastid (GO:0009536);;	--	Putative membrane protein ycf1 OS=Lemna minor GN=ycf1 PE=3 SV=1	hypothetical chloroplast RF19 (chloroplast) [Spirodela polyrhiza]
comp13003_c0	1	p1	(G)14	14	1	14	#N/A	#N/A	#N/A	#N/A	#N/A	#N/A
comp13003_c0	2	p1	(T)14	14	1002	1015	#N/A	#N/A	#N/A	#N/A	#N/A	#N/A
comp13004_c0	1	p2	(CA)9	18	7	24	--	--	--	--	Pre-mRNA cleavage complex 2 protein Pcf11 OS=Homo sapiens GN=PCF11 PE=1 SV=3	PREDICTED: uncharacterized protein LOC100255600 [Vitis vinifera]
comp13006_c0	1	p1	(T)12	12	1133	1144	--	--	Cellular Component: intracellular membrane-bounded organelle (GO:0043231);; Cellular Component: cytoplasmic part (GO:0044444);;	--	--	Os06g0225100 [Oryza sativa Japonica Group]
comp13011_c0	1	p1	(T)10	10	2116	2125	--	--	Cellular Component: mitochondrion (GO:0005739);; Cellular Component: chloroplast (GO:0009507);; Biological Process: embryo development ending in seed dormancy (GO:0009793);;	--	Pentatricopeptide repeat-containing protein At2g41720 OS=Arabidopsis thaliana GN=EMB2654 PE=2 SV=1	PREDICTED: pentatricopeptide repeat-containing protein At2g41720-like [Setaria italica]
comp13013_c0	1	p1	(T)10	10	1939	1948	--	--	Molecular Function: ubiquitin-protein ligase activity (GO:0004842);; Molecular Function: protein binding (GO:0005515);; Cellular Component: nucleus (GO:0005634);; Cellular Component: integral component of peroxisomal membrane (GO:0005779);; Cellular Component: endoplasmic reticulum (GO:0005783);; Cellular Component: cytosol (GO:0005829);; Biological Process: protein monoubiquitination (GO:0006513…	K13346|0.0|vvi:100262831|hypothetical protein LOC100262831	Peroxisome biogenesis factor 10 OS=Arabidopsis thaliana GN=PEX10 PE=1 SV=1	Peroxisome biogenesis factor 10 [Theobroma cacao]
comp13014_c0	1	p2	(AG)6	12	395	406	--	--	Molecular Function: DNA binding (GO:0003677);; Molecular Function: chromatin binding (GO:0003682);; Cellular Component: nucleus (GO:0005634);; Biological Process: transcription, DNA-templated (GO:0006351);; Biological Process: flower development (GO:0009908);; Biological Process: determination of dorsal/ventral asymmetry (GO:0048262);;	--	Transcription factor DIVARICATA OS=Antirrhinum majus GN=DIVARICATA PE=2 SV=1	PREDICTED: uncharacterized protein LOC100244960 [Vitis vinifera]
comp13021_c0	1	p2	(AG)7	14	888	901	--	--	--	--	--	hypothetical protein OsI_13819 [Oryza sativa Indica Group]
comp13023_c0	1	p1	(A)12	12	129	140	--	--	Molecular Function: monooxygenase activity (GO:0004497);; Molecular Function: iron ion binding (GO:0005506);; Molecular Function: electron carrier activity (GO:0009055);; Cellular Component: cytoplasmic membrane-bounded vesicle (GO:0016023);; Molecular Function: oxidoreductase activity, acting on paired donors, with incorporation or reduction of molecular oxygen (GO:0016705);; Molecular Function:…	--	Cytochrome P450 71A9 OS=Glycine max GN=CYP71A9 PE=2 SV=1	cytochrome P450, partial [Echinochloa phyllopogon]
comp13025_c0	1	p3	(TCT)6	18	30	47	--	--	--	--	Translation initiation factor IF-2 OS=Rhodococcus sp. (strain RHA1) GN=infB PE=3 SV=1	predicted protein [Populus trichocarpa]
comp13026_c0	1	p1	(T)15	15	1998	2012	--	--	Cellular Component: cytoplasm (GO:0005737);; Molecular Function: hydrolase activity (GO:0016787);; Cellular Component: plant extracellular matrix (GO:0048196);;	--	Mucin-19 OS=Mus musculus GN=Muc19 PE=2 SV=2	PREDICTED: putative aminoacrylate hydrolase RutD [Vitis vinifera]
comp13028_c0	1	p1	(A)11	11	218	228	[J]	Translation, ribosomal structure and biogenesis	Biological Process: pseudouridine synthesis (GO:0001522);; Molecular Function: RNA binding (GO:0003723);; Cellular Component: mitochondrion (GO:0005739);; Molecular Function: pseudouridine synthase activity (GO:0009982);;	--	RNA pseudouridine synthase 3, mitochondrial OS=Oryza sativa subsp. japonica GN=Os08g0520100 PE=2 SV=1	Os08g0520100 [Oryza sativa Japonica Group]
comp1303_c0	1	p1	(A)10	10	1743	1752	[R]	General function prediction only	Molecular Function: organic cyclic compound binding (GO:0097159);; Molecular Function: heterocyclic compound binding (GO:1901363);;	--	Polyadenylate-binding protein RBP45 OS=Nicotiana plumbaginifolia GN=RBP45 PE=1 SV=1	PREDICTED: RNA-binding post-transcriptional regulator csx1-like [Vitis vinifera]
comp13030_c0	1	p1	(T)10	10	1361	1370	--	--	--	--	--	hypothetical protein PRUPE_ppa004675mg [Prunus persica]
comp13033_c0	1	p1	(T)10	10	1068	1077	--	--	Biological Process: protein targeting to membrane (GO:0006612);; Biological Process: response to water deprivation (GO:0009414);; Biological Process: response to wounding (GO:0009611);; Biological Process: response to fungus (GO:0009620);; Biological Process: jasmonic acid biosynthetic process (GO:0009695);; Biological Process: salicylic acid mediated signaling pathway (GO:0009863);; Biological P…	--	Transmembrane protein 53 OS=Mus musculus GN=Tmem53 PE=2 SV=1	Alpha/beta-Hydrolases superfamily protein [Theobroma cacao]
comp1304_c0	1	p1	(A)11	11	3780	3790	--	--	Molecular Function: nucleotide binding (GO:0000166);; Cellular Component: cytoplasmic mRNA processing body (GO:0000932);; Molecular Function: RNA binding (GO:0003723);; Cellular Component: nucleus (GO:0005634);; Biological Process: mRNA processing (GO:0006397);; Biological Process: regulation of translation (GO:0006417);; Molecular Function: 2-alkenal reductase [NAD(P)] activity (GO:0032440);; Bi…	--	Polypyrimidine tract-binding protein homolog 3 OS=Arabidopsis thaliana GN=At1g43190 PE=2 SV=1	polypyrimidine tract binding protein, putative [Ricinus communis]
comp13041_c0	1	p1	(A)11	11	726	736	--	--	--	--	--	PREDICTED: uncharacterized protein LOC101766578 [Setaria italica]
comp13045_c0	1	p1	(T)21	21	1	21	#N/A	#N/A	#N/A	#N/A	#N/A	#N/A
comp1305_c1	1	p1	(A)11	11	271	281	--	--	Cellular Component: mitochondrion (GO:0005739);; Cellular Component: integral component of peroxisomal membrane (GO:0005779);; Cellular Component: plasmodesma (GO:0009506);; Cellular Component: chloroplast (GO:0009507);; Biological Process: systemic acquired resistance (GO:0009627);; Biological Process: peroxisome fission (GO:0016559);; Biological Process: regulation of defense response (GO:00313…	--	Peroxisomal membrane protein 11C OS=Arabidopsis thaliana GN=PEX11C PE=1 SV=1	peroxisomal biogenesis factor, putative [Ricinus communis]
comp1305_c1	2	p1	(T)10	10	1525	1534	--	--	Cellular Component: mitochondrion (GO:0005739);; Cellular Component: integral component of peroxisomal membrane (GO:0005779);; Cellular Component: plasmodesma (GO:0009506);; Cellular Component: chloroplast (GO:0009507);; Biological Process: systemic acquired resistance (GO:0009627);; Biological Process: peroxisome fission (GO:0016559);; Biological Process: regulation of defense response (GO:00313…	--	Peroxisomal membrane protein 11C OS=Arabidopsis thaliana GN=PEX11C PE=1 SV=1	peroxisomal biogenesis factor, putative [Ricinus communis]
comp1305_c1	3	p1	(A)12	12	3942	3953	--	--	Cellular Component: mitochondrion (GO:0005739);; Cellular Component: integral component of peroxisomal membrane (GO:0005779);; Cellular Component: plasmodesma (GO:0009506);; Cellular Component: chloroplast (GO:0009507);; Biological Process: systemic acquired resistance (GO:0009627);; Biological Process: peroxisome fission (GO:0016559);; Biological Process: regulation of defense response (GO:00313…	--	Peroxisomal membrane protein 11C OS=Arabidopsis thaliana GN=PEX11C PE=1 SV=1	peroxisomal biogenesis factor, putative [Ricinus communis]
comp13052_c0	1	p2	(CG)10	20	1628	1647	--	--	--	--	Methyl-CpG-binding domain-containing protein 9 OS=Arabidopsis thaliana GN=MBD9 PE=2 SV=1	putative Bromodomain adjacent to zinc finger domain protein 1A [Aegilops tauschii]
comp13057_c0	1	p1	(T)14	14	1146	1159	--	--	--	--	Vegetative cell wall protein gp1 OS=Chlamydomonas reinhardtii GN=GP1 PE=2 SV=1	Uncharacterized protein TCM_036939 [Theobroma cacao]
comp13062_c0	1	p3	(TTC)6	18	428	445	--	--	--	--	Uncharacterized protein DDB_G0271670 OS=Dictyostelium discoideum GN=DDB_G0271670 PE=4 SV=1	hypothetical protein OsI_22898 [Oryza sativa Indica Group]
comp13063_c0	1	p2	(GA)9	18	1	18	--	--	Cellular Component: plastid (GO:0009536);;	--	--	PREDICTED: uncharacterized protein LOC100246151 [Vitis vinifera]
comp13065_c0	1	p2	(TC)8	16	50	65	[E]	Amino acid transport and metabolism	Molecular Function: acid phosphatase activity (GO:0003993);; Biological Process: metabolic process (GO:0008152);; Cellular Component: plastid (GO:0009536);; Molecular Function: lyase activity (GO:0016829);; Molecular Function: pyridoxal phosphate binding (GO:0030170);; Molecular Function: metal ion binding (GO:0046872);;	--	Arginine decarboxylase OS=Bacillus subtilis (strain 168) GN=speA PE=1 SV=2	hypothetical protein PRUPE_ppa003551mg [Prunus persica]
comp13066_c0	1	p3	(CTT)6	18	7	24	[I]	Lipid transport and metabolism	Molecular Function: catalytic activity (GO:0003824);; Cellular Component: plasma membrane (GO:0005886);; Biological Process: metabolic process (GO:0008152);;	K01897|1e-166|vvi:100265062|hypothetical protein LOC100265062	Long chain acyl-CoA synthetase 4 OS=Arabidopsis thaliana GN=LACS4 PE=2 SV=1	PREDICTED: long chain acyl-CoA synthetase 4 [Vitis vinifera]
comp13066_c0	2	p3	(GGA)5	15	314	328	[I]	Lipid transport and metabolism	Molecular Function: catalytic activity (GO:0003824);; Cellular Component: plasma membrane (GO:0005886);; Biological Process: metabolic process (GO:0008152);;	K01897|1e-166|vvi:100265062|hypothetical protein LOC100265062	Long chain acyl-CoA synthetase 4 OS=Arabidopsis thaliana GN=LACS4 PE=2 SV=1	PREDICTED: long chain acyl-CoA synthetase 4 [Vitis vinifera]
comp13068_c0	1	p2	(AG)6	12	1	12	[J]	Translation, ribosomal structure and biogenesis	Cellular Component: histone acetyltransferase complex (GO:0000123);; Biological Process: regulation of transcription, DNA-templated (GO:0006355);; Biological Process: response to red or far red light (GO:0009639);; Biological Process: response to hormone (GO:0009725);; Biological Process: root morphogenesis (GO:0010015);; Molecular Function: H3 histone acetyltransferase activity (GO:0010484);; Bi…	--	Homeobox-leucine zipper protein HAT1 OS=Arabidopsis thaliana GN=HAT1 PE=2 SV=1	PREDICTED: homeobox-leucine zipper protein HAT4-like isoform 1 [Vitis vinifera]
comp13073_c0	1	p3	(GAA)5	15	575	589	--	--	--	--	Uncharacterized protein ORF4 OS=Grapevine fleck virus (isolate Italy/MT48) GN=ORF4 PE=4 SV=1	unnamed protein product [Chondrus crispus]
comp13074_c0	1	p3	(GCA)7	21	3	23	--	--	Cellular Component: mitochondrion (GO:0005739);; Biological Process: defense response to bacterium (GO:0042742);; Biological Process: root development (GO:0048364);; Biological Process: defense response to fungus (GO:0050832);; Biological Process: cell wall repair (GO:0071433);;	--	--	Uncharacterized protein isoform 1 [Theobroma cacao]
comp13084_c0	1	p2	(AG)7	14	63	76	--	--	--	--	Cleavage and polyadenylation specificity factor subunit 6 OS=Mus musculus GN=Cpsf6 PE=1 SV=1	Uncharacterized protein TCM_029159 [Theobroma cacao]
comp13084_c0	2	p3	(CGG)6	18	407	424	--	--	--	--	Cleavage and polyadenylation specificity factor subunit 6 OS=Mus musculus GN=Cpsf6 PE=1 SV=1	Uncharacterized protein TCM_029159 [Theobroma cacao]
comp13093_c0	1	p2	(GA)10	20	1	20	#N/A	#N/A	#N/A	#N/A	#N/A	#N/A
comp13099_c0	1	p2	(AG)6	12	251	262	[D]	Cell cycle control, cell division, chromosome partitioning	Molecular Function: binding (GO:0005488);; Cellular Component: intracellular (GO:0005622);; Biological Process: single-organism process (GO:0044699);; Biological Process: regulation of cellular process (GO:0050794);; Biological Process: response to stimulus (GO:0050896);;	--	Uncharacterized protein LOC284861 OS=Homo sapiens PE=2 SV=1	zinc finger protein-like [Vitis vinifera]
comp1310_c1	1	p1	(A)20	20	1	20	[P]	Inorganic ion transport and metabolism	Molecular Function: ammonium transmembrane transporter activity (GO:0008519);; Cellular Component: integral component of membrane (GO:0016021);; Biological Process: ammonium transmembrane transport (GO:0072488);;	--	Ammonium transporter 1 member 2 OS=Solanum lycopersicum GN=AMT1-2 PE=2 SV=1	AMT1;2 [Citrus trifoliata]
comp1310_c1	2	p2	(GA)7	14	1953	1966	[P]	Inorganic ion transport and metabolism	Molecular Function: ammonium transmembrane transporter activity (GO:0008519);; Cellular Component: integral component of membrane (GO:0016021);; Biological Process: ammonium transmembrane transport (GO:0072488);;	--	Ammonium transporter 1 member 2 OS=Solanum lycopersicum GN=AMT1-2 PE=2 SV=1	AMT1;2 [Citrus trifoliata]
comp13102_c0	1	p1	(A)10	10	3140	3149	[S]	Function unknown	--	--	Disease resistance protein At4g27190 OS=Arabidopsis thaliana GN=At4g27190 PE=2 SV=1	LRR and NB-ARC domains-containing disease resistance protein, putative [Theobroma cacao]
comp13106_c0	1	p3	(CGT)5	15	768	782	--	--	Cellular Component: plastid (GO:0009536);;	--	Uncharacterized protein DDB_G0271670 OS=Dictyostelium discoideum GN=DDB_G0271670 PE=4 SV=1	PREDICTED: uncharacterized protein LOC100248749 [Vitis vinifera]
comp13110_c0	1	p2	(CT)10	20	1	20	--	--	--	--	--	hypothetical protein EMIHUDRAFT_467011 [Emiliania huxleyi CCMP1516]
comp13117_c0	1	p3	(CTG)5	15	1396	1410	--	--	Cellular Component: mitochondrion (GO:0005739);;	--	Uncharacterized protein DKFZp434B061 OS=Homo sapiens PE=2 SV=2	conserved hypothetical protein [Ricinus communis]
comp1312_c0	1	p3	(TCA)5	15	2070	2084	--	--	Cellular Component: cell wall (GO:0005618);; Cellular Component: plasma membrane (GO:0005886);; Molecular Function: protein phosphatase type 2A regulator activity (GO:0008601);; Biological Process: response to ethylene (GO:0009723);; Biological Process: positive regulation of abscisic acid-activated signaling pathway (GO:0009789);; Biological Process: auxin polar transport (GO:0009926);; Biologic…	K03456|0.0|rcu:RCOM_0353450|serine/threonine protein phosphatase 2a regulatory subunit A, putative	Serine/threonine-protein phosphatase 2A 65 kDa regulatory subunit A beta isoform OS=Arabidopsis thaliana GN=PP2AA2 PE=1 SV=2	PREDICTED: serine/threonine-protein phosphatase 2A 65 kDa regulatory subunit A beta isoform-like isoform X1 [Setaria italica]
comp13126_c0	1	p1	(T)10	10	2062	2071	--	--	Molecular Function: binding (GO:0005488);;	--	Kinesin-like protein NACK1 OS=Arabidopsis thaliana GN=NACK1 PE=1 SV=1	Kinesin-related protein 11 [Triticum urartu]
comp13127_c0	1	c	(GAA)5---(AG)7	78	3086	3163	--	--	Biological Process: response to reactive oxygen species (GO:0000302);; Biological Process: response to iron ion (GO:0010039);; Biological Process: iron ion homeostasis (GO:0055072);;	--	Coiled-coil domain-containing protein 18 OS=Mus musculus GN=Ccdc18 PE=2 SV=1	PREDICTED: uncharacterized protein LOC100262916 [Vitis vinifera]
comp1313_c0	1	p3	(CTC)6	18	5	22	--	--	--	--	F-box/kelch-repeat protein At5g60570 OS=Arabidopsis thaliana GN=At5g60570 PE=2 SV=1	PREDICTED: F-box/kelch-repeat protein At5g60570 [Vitis vinifera]
comp13139_c0	2	p1	(A)10	10	1917	1926	#N/A	#N/A	#N/A	#N/A	#N/A	#N/A
comp13139_c0	1	p3	(AAT)5	15	1221	1235	#N/A	#N/A	#N/A	#N/A	#N/A	#N/A
comp13143_c0	1	p2	(GA)8	16	137	152	[J]	Translation, ribosomal structure and biogenesis	Biological Process: RNA splicing, via endonucleolytic cleavage and ligation (GO:0000394);; Molecular Function: protein serine/threonine kinase activity (GO:0004674);; Molecular Function: protein serine/threonine/tyrosine kinase activity (GO:0004712);; Molecular Function: ATP binding (GO:0005524);; Cellular Component: cytoplasm (GO:0005737);; Cellular Component: plasma membrane (GO:0005886);; Biol…	--	Forkhead box protein G1 OS=Pipistrellus rusticus GN=FOXG1 PE=3 SV=1	putative protein kinase [Phaseolus vulgaris]
comp13146_c0	1	p2	(AG)10	20	363	382	#N/A	#N/A	#N/A	#N/A	#N/A	#N/A
comp13148_c0	1	p3	(TCC)5	15	2582	2596	--	--	Cellular Component: endosome (GO:0005768);; Cellular Component: Golgi apparatus (GO:0005794);; Cellular Component: trans-Golgi network (GO:0005802);; Molecular Function: transferase activity (GO:0016740);;	--	Probable methyltransferase PMT28 OS=Arabidopsis thaliana GN=At1g19430 PE=1 SV=1	PREDICTED: probable methyltransferase PMT28 [Vitis vinifera]
comp13149_c0	1	p3	(GAC)5	15	445	459	--	--	--	K14439|5e-13|pop:POPTR_566361|CHR922	Putative protein TPRXL OS=Homo sapiens GN=TPRXL PE=5 SV=2	PREDICTED: helicase SWR1-like [Vitis vinifera]
comp1315_c0	1	p2	(TC)8	16	1936	1951	--	--	--	--	--	unnamed protein product [Vitis vinifera]
comp13150_c0	1	p1	(A)15	15	65	79	--	--	Cellular Component: extracellular region (GO:0005576);; Biological Process: acetyl-CoA metabolic process (GO:0006084);; Biological Process: defense response (GO:0006952);; Biological Process: cytokinin-activated signaling pathway (GO:0009736);; Biological Process: sterol biosynthetic process (GO:0016126);; Biological Process: brassinosteroid biosynthetic process (GO:0016132);; Molecular Function:…	--	Dirigent protein 6 OS=Arabidopsis thaliana GN=DIR6 PE=1 SV=1	disease resistance-responsive family protein [Capsella rubella]
comp13150_c0	2	p3	(GAG)6	18	723	740	--	--	Cellular Component: extracellular region (GO:0005576);; Biological Process: acetyl-CoA metabolic process (GO:0006084);; Biological Process: defense response (GO:0006952);; Biological Process: cytokinin-activated signaling pathway (GO:0009736);; Biological Process: sterol biosynthetic process (GO:0016126);; Biological Process: brassinosteroid biosynthetic process (GO:0016132);; Molecular Function:…	--	Dirigent protein 6 OS=Arabidopsis thaliana GN=DIR6 PE=1 SV=1	disease resistance-responsive family protein [Capsella rubella]
comp13153_c0	1	p1	(T)10	10	448	457	#N/A	#N/A	#N/A	#N/A	#N/A	#N/A
comp13153_c0	2	p1	(G)12	12	1436	1447	#N/A	#N/A	#N/A	#N/A	#N/A	#N/A
comp13154_c0	1	p1	(A)10	10	106	115	#N/A	#N/A	#N/A	#N/A	#N/A	#N/A
comp13154_c0	2	p1	(C)10	10	2483	2492	#N/A	#N/A	#N/A	#N/A	#N/A	#N/A
comp13157_c0	1	p1	(A)14	14	131	144	#N/A	#N/A	#N/A	#N/A	#N/A	#N/A
comp1316_c0	1	p2	(CT)9	18	91	108	--	--	Molecular Function: zinc ion binding (GO:0008270);; Molecular Function: actin filament binding (GO:0051015);; Biological Process: actin filament bundle assembly (GO:0051017);;	--	Pollen-specific protein SF3 OS=Helianthus annuus GN=SF3 PE=2 SV=1	LIM1 [Hevea brasiliensis]
comp13161_c0	1	c	(TG)6g(GA)8	29	525	553	[R]	General function prediction only	Cellular Component: plastid (GO:0009536);; Biological Process: embryo development ending in seed dormancy (GO:0009793);;	--	Embryogenesis-associated protein EMB8 OS=Picea glauca GN=EMB8 PE=2 SV=1	PREDICTED: embryogenesis-associated protein EMB8-like [Cicer arietinum]
comp13171_c0	1	p2	(AG)7	14	423	436	#N/A	#N/A	#N/A	#N/A	#N/A	#N/A
comp13172_c0	1	p1	(A)10	10	1370	1379	#N/A	#N/A	#N/A	#N/A	#N/A	#N/A
comp13172_c0	2	p1	(T)19	19	2567	2585	#N/A	#N/A	#N/A	#N/A	#N/A	#N/A
comp13175_c0	1	p1	(C)11	11	1711	1721	--	--	--	--	--	unnamed protein product [Vitis vinifera]
comp13178_c0	1	p2	(CA)11	22	277	298	--	--	--	--	Uncharacterized serine-rich protein C215.13 OS=Schizosaccharomyces pombe (strain 972 / ATCC 24843) GN=SPBC215.13 PE=1 SV=1	predicted protein [Populus trichocarpa]
comp13178_c0	2	p3	(TTC)5	15	414	428	--	--	--	--	Uncharacterized serine-rich protein C215.13 OS=Schizosaccharomyces pombe (strain 972 / ATCC 24843) GN=SPBC215.13 PE=1 SV=1	predicted protein [Populus trichocarpa]
comp13180_c0	1	p1	(A)12	12	1	12	--	--	--	--	--	hypothetical protein PRUPE_ppa021915mg, partial [Prunus persica]
comp13187_c0	1	p1	(A)10	10	393	402	[H]	Coenzyme transport and metabolism	Molecular Function: cation binding (GO:0043169);; Molecular Function: carboxylic ester hydrolase activity (GO:0052689);; Biological Process: quinone biosynthetic process (GO:1901663);;	--	Protein PHYLLO, chloroplastic OS=Arabidopsis thaliana GN=PHYLLO PE=2 SV=2	menaquinone biosynthesis protein, putative [Ricinus communis]
comp13188_c0	1	p3	(AAG)7	21	1	21	--	--	--	--	--	hypothetical protein OsI_04198 [Oryza sativa Indica Group]
comp13190_c0	1	p2	(TA)6	12	796	807	--	--	--	--	Transmembrane protein 131-like OS=Bos taurus PE=2 SV=2	hypothetical protein RCOM_0601570 [Ricinus communis]
comp13194_c0	1	p1	(A)11	11	213	223	--	--	Cellular Component: plastid (GO:0009536);; Cellular Component: Cul4-RING ubiquitin ligase complex (GO:0080008);;	K14298|2e-12|rcu:RCOM_0471040|plant poly(A)+ RNA export protein, putative	Rae1-like protein At1g80670 OS=Arabidopsis thaliana GN=At1g80670 PE=2 SV=2	RNA export protein, partial [Olea europaea]
comp13198_c0	1	p3	(CAG)6	18	2005	2022	[P]	Inorganic ion transport and metabolism	Biological Process: cation transport (GO:0006812);; Molecular Function: cation transmembrane transporter activity (GO:0008324);; Cellular Component: integral component of membrane (GO:0016021);; Biological Process: transmembrane transport (GO:0055085);;	K14689|0.0|vvi:100259043|hypothetical protein LOC100259043	Metal tolerance protein 1 OS=Oryza sativa subsp. japonica GN=MTP1 PE=2 SV=1	NGMTP1 [Nicotiana glauca]
comp13199_c0	1	p1	(A)18	18	388	405	#N/A	#N/A	#N/A	#N/A	#N/A	#N/A
comp13208_c0	1	p2	(TC)10	20	1	20	[M]	Cell wall/membrane/envelope biogenesis	Cellular Component: mitochondrion (GO:0005739);; Biological Process: fatty acid metabolic process (GO:0006631);; Biological Process: response to cold (GO:0009409);; Biological Process: response to water deprivation (GO:0009414);; Biological Process: response to light stimulus (GO:0009416);; Biological Process: response to salt stress (GO:0009651);; Cellular Component: chloroplast outer membrane (…	K03715|0.0|sbi:SORBI_04g036240|hypothetical protein	Probable monogalactosyldiacylglycerol synthase 3, chloroplastic OS=Oryza sativa subsp. japonica GN=MGD3 PE=2 SV=2	hypothetical protein SORBIDRAFT_04g036240 [Sorghum bicolor]
comp13209_c0	1	p3	(CTG)6	18	1797	1814	[J]	Translation, ribosomal structure and biogenesis	Biological Process: pseudouridine synthesis (GO:0001522);; Molecular Function: RNA binding (GO:0003723);; Cellular Component: chloroplast (GO:0009507);; Molecular Function: pseudouridine synthase activity (GO:0009982);; Molecular Function: transferase activity, transferring phosphorus-containing groups (GO:0016772);;	K06180|1e-178|osa:4342081|Os06g0717400	RNA pseudouridine synthase 2, chloroplastic OS=Oryza sativa subsp. japonica GN=Os06g0717400 PE=2 SV=1	PREDICTED: RNA pseudourine synthase 2, chloroplastic-like [Vitis vinifera]
comp13215_c0	1	p2	(AG)8	16	1	16	--	--	Cellular Component: mitochondrion (GO:0005739);; Biological Process: threonine catabolic process (GO:0006567);; Cellular Component: chloroplast (GO:0009507);; Molecular Function: oxidoreductase activity, acting on the CH-CH group of donors, NAD or NADP as acceptor (GO:0016628);;	--	Arogenate dehydrogenase 2, chloroplastic OS=Arabidopsis thaliana GN=TYRAAT2 PE=1 SV=1	hypothetical protein OsI_23283 [Oryza sativa Indica Group]
comp13216_c0	1	p1	(T)17	17	748	764	#N/A	#N/A	#N/A	#N/A	#N/A	#N/A
comp13222_c0	1	c	(GA)7---(CTT)5	71	29	99	--	--	--	--	--	Cell wall protein AWA1 isoform 3 [Theobroma cacao]
comp13223_c0	1	p2	(AG)10	20	1702	1721	#N/A	#N/A	#N/A	#N/A	#N/A	#N/A
comp13230_c0	2	p1	(A)10	10	388	397	--	--	--	--	Serine/arginine repetitive matrix protein 2 OS=Homo sapiens GN=SRRM2 PE=1 SV=2	hypothetical protein CTHT_0000420 [Chaetomium thermophilum var. thermophilum DSM 1495]
comp13230_c0	3	p1	(A)14	14	523	536	--	--	--	--	Serine/arginine repetitive matrix protein 2 OS=Homo sapiens GN=SRRM2 PE=1 SV=2	hypothetical protein CTHT_0000420 [Chaetomium thermophilum var. thermophilum DSM 1495]
comp13230_c0	1	p3	(TCC)6	18	6	23	--	--	--	--	Serine/arginine repetitive matrix protein 2 OS=Homo sapiens GN=SRRM2 PE=1 SV=2	hypothetical protein CTHT_0000420 [Chaetomium thermophilum var. thermophilum DSM 1495]
comp13239_c0	1	p1	(T)14	14	228	241	#N/A	#N/A	#N/A	#N/A	#N/A	#N/A
comp13242_c0	1	p1	(A)10	10	121	130	[G]	Carbohydrate transport and metabolism	Molecular Function: alpha-amylase activity (GO:0004556);; Molecular Function: calcium ion binding (GO:0005509);; Cellular Component: extracellular region (GO:0005576);; Biological Process: carbohydrate metabolic process (GO:0005975);; Molecular Function: glucan 1,4-alpha-maltotetraohydrolase activity (GO:0033910);;	--	Probable alpha-amylase 2 OS=Arabidopsis thaliana GN=AMY2 PE=2 SV=1	PREDICTED: probable alpha-amylase 2-like [Setaria italica]
comp13245_c0	1	p2	(CA)6	12	997	1008	--	--	--	--	Serine/arginine repetitive matrix protein 1 OS=Pongo abelii GN=SRRM1 PE=2 SV=1	hypothetical protein OsI_01441 [Oryza sativa Indica Group]
comp13251_c0	1	p1	(T)14	14	236	249	#N/A	#N/A	#N/A	#N/A	#N/A	#N/A
comp13254_c0	1	p3	(GCA)6	18	506	523	--	--	Cellular Component: mitochondrion (GO:0005739);; Cellular Component: plasma membrane (GO:0005886);;	--	Uncharacterized protein DDB_G0271670 OS=Dictyostelium discoideum GN=DDB_G0271670 PE=4 SV=1	Uncharacterized protein isoform 1 [Theobroma cacao]
comp13256_c0	1	p2	(TC)6	12	1329	1340	--	--	Molecular Function: calcium-dependent protein serine/threonine phosphatase activity (GO:0004723);; Molecular Function: calcium ion binding (GO:0005509);; Biological Process: detection of calcium ion (GO:0005513);; Cellular Component: cytoplasm (GO:0005737);; Cellular Component: calcineurin complex (GO:0005955);; Biological Process: stomatal movement (GO:0010118);; Biological Process: calcium-medi…	--	Calcineurin B-like protein 7 OS=Oryza sativa subsp. japonica GN=CBL7 PE=2 SV=1	predicted protein [Populus trichocarpa]
comp13257_c0	1	p1	(T)10	10	390	399	--	--	Molecular Function: transcription cofactor activity (GO:0003712);; Molecular Function: histone acetyltransferase activity (GO:0004402);; Molecular Function: calmodulin binding (GO:0005516);; Cellular Component: nucleus (GO:0005634);; Biological Process: regulation of transcription, DNA-templated (GO:0006355);; Molecular Function: zinc ion binding (GO:0008270);; Biological Process: embryo sac deve…	--	BTB/POZ and TAZ domain-containing protein 3 OS=Arabidopsis thaliana GN=BT3 PE=1 SV=2	unnamed protein product [Vitis vinifera]
comp13259_c0	1	p3	(GGA)7	21	1333	1353	[E]	Amino acid transport and metabolism	Biological Process: amino acid transmembrane transport (GO:0003333);; Molecular Function: L-glutamate transmembrane transporter activity (GO:0005313);; Cellular Component: plasma membrane (GO:0005886);; Molecular Function: arginine transmembrane transporter activity (GO:0015181);; Molecular Function: L-lysine transmembrane transporter activity (GO:0015189);; Molecular Function: cationic amino aci…	--	Cationic amino acid transporter 5 OS=Arabidopsis thaliana GN=CAT5 PE=1 SV=1	PREDICTED: cationic amino acid transporter 5-like [Cucumis sativus]
comp1326_c0	1	p3	(GGC)5	15	210	224	--	--	Biological Process: nuclear-transcribed mRNA catabolic process (GO:0000956);; Cellular Component: nucleus (GO:0005634);; Biological Process: fatty acid beta-oxidation (GO:0006635);; Biological Process: protein import into peroxisome matrix (GO:0016558);;	--	Protein FRIGIDA OS=Arabidopsis thaliana GN=FRI PE=2 SV=1	PREDICTED: protein FRIGIDA-like [Vitis vinifera]
comp13267_c0	1	p3	(GCC)7	21	1	21	--	--	Cellular Component: cytoplasmic membrane-bounded vesicle (GO:0016023);;	--	Mediator of RNA polymerase II transcription subunit 33A OS=Arabidopsis thaliana GN=MED33A PE=1 SV=1	PREDICTED: uncharacterized protein LOC100258764 [Vitis vinifera]
comp1327_c0	1	p2	(CT)6	12	2647	2658	[RTKL]	--	Molecular Function: calmodulin-dependent protein kinase activity (GO:0004683);; Molecular Function: calcium-dependent protein kinase C activity (GO:0004698);; Molecular Function: calcium ion binding (GO:0005509);; Molecular Function: ATP binding (GO:0005524);; Cellular Component: nucleus (GO:0005634);; Cellular Component: cytoplasm (GO:0005737);; Cellular Component: plasma membrane (GO:0005886);;…	K13412|0.0|sbi:SORBI_02g036730|hypothetical protein	Calcium-dependent protein kinase 8 OS=Arabidopsis thaliana GN=CPK8 PE=1 SV=1	PREDICTED: calcium-dependent protein kinase 7-like [Brachypodium distachyon]
comp13274_c0	1	p1	(A)10	10	591	600	#N/A	#N/A	#N/A	#N/A	#N/A	#N/A
comp13277_c0	1	p3	(GGA)5	15	198	212	--	--	Cellular Component: chloroplast (GO:0009507);; Molecular Function: adenyl nucleotide binding (GO:0030554);; Biological Process: cell redox homeostasis (GO:0045454);;	--	CBS domain-containing protein CBSX1, chloroplastic OS=Arabidopsis thaliana GN=CBSX1 PE=1 SV=2	unknown [Lotus japonicus]
comp13291_c0	1	p1	(A)16	16	142	157	--	--	--	--	--	Uncharacterized protein TCM_020542 [Theobroma cacao]
comp13291_c0	2	p3	(GAT)5	15	293	307	--	--	--	--	--	Uncharacterized protein TCM_020542 [Theobroma cacao]
comp13293_c0	1	p1	(T)21	21	398	418	#N/A	#N/A	#N/A	#N/A	#N/A	#N/A
comp13297_c0	1	p2	(AG)9	18	505	522	#N/A	#N/A	#N/A	#N/A	#N/A	#N/A
comp13305_c0	1	p1	(T)10	10	791	800	#N/A	#N/A	#N/A	#N/A	#N/A	#N/A
comp13319_c0	1	p3	(GCC)7	21	2	22	--	--	--	--	Translation initiation factor IF-2 OS=Frankia sp. (strain EAN1pec) GN=infB PE=3 SV=1	unnamed protein product [Vitis vinifera]
comp13319_c0	2	p3	(CTC)5	15	324	338	--	--	--	--	Translation initiation factor IF-2 OS=Frankia sp. (strain EAN1pec) GN=infB PE=3 SV=1	unnamed protein product [Vitis vinifera]
comp13321_c0	1	p3	(CTT)6	18	335	352	#N/A	#N/A	#N/A	#N/A	#N/A	#N/A
comp13326_c0	1	p1	(C)13	13	1187	1199	--	--	--	--	--	predicted protein [Populus trichocarpa]
comp13328_c0	1	p2	(AC)6	12	1325	1336	--	--	Biological Process: response to insect (GO:0009625);; Biological Process: systemic acquired resistance, salicylic acid mediated signaling pathway (GO:0009862);; Biological Process: negative regulation of defense response (GO:0031348);;	--	--	PREDICTED: uncharacterized protein LOC100242796 [Vitis vinifera]
comp13332_c0	1	p1	(T)10	10	373	382	#N/A	#N/A	#N/A	#N/A	#N/A	#N/A
comp13336_c0	1	c	(T)11---(T)11	59	972	1030	#N/A	#N/A	#N/A	#N/A	#N/A	#N/A
comp1334_c0	1	p2	(AT)6	12	115	126	--	--	--	--	--	unnamed protein product [Vitis vinifera]
comp13340_c0	1	p2	(TC)7	14	487	500	#N/A	#N/A	#N/A	#N/A	#N/A	#N/A
comp13341_c0	1	p3	(CAT)5	15	319	333	[RTKL]	--	Molecular Function: protein serine/threonine kinase activity (GO:0004674);; Molecular Function: ATP binding (GO:0005524);; Cellular Component: mitochondrion (GO:0005739);; Biological Process: protein phosphorylation (GO:0006468);;	--	Probable receptor-like protein kinase At4g10390 OS=Arabidopsis thaliana GN=At4g10390 PE=2 SV=1	hypothetical protein SORBIDRAFT_01g049750 [Sorghum bicolor]
comp13350_c0	1	p2	(TC)6	12	240	251	--	--	--	--	--	ATP synthase subunit-like protein [Medicago truncatula]
comp13351_c0	1	p1	(T)11	11	497	507	#N/A	#N/A	#N/A	#N/A	#N/A	#N/A
comp13351_c0	2	p4	(AAGA)5	20	1780	1799	#N/A	#N/A	#N/A	#N/A	#N/A	#N/A
comp13356_c0	1	p2	(AG)7	14	1075	1088	--	--	Cellular Component: nucleus (GO:0005634);;	--	Protein MIZU-KUSSEI 1 OS=Arabidopsis thaliana GN=MIZ1 PE=1 SV=1	PREDICTED: uncharacterized protein LOC100263245 [Vitis vinifera]
comp13359_c0	1	p1	(T)10	10	969	978	--	--	Biological Process: defense response to oomycetes (GO:0002229);; Cellular Component: mitochondrion (GO:0005739);; Cellular Component: chloroplast (GO:0009507);; Biological Process: stomatal complex morphogenesis (GO:0010103);; Biological Process: positive regulation of hydrogen peroxide biosynthetic process (GO:0010729);; Cellular Component: membrane (GO:0016020);; Biological Process: photosynthe…	--	--	Resistance to phytophthora 1 isoform 1 [Theobroma cacao]
comp13362_c0	1	p2	(AG)10	20	692	711	--	--	Cellular Component: mitochondrion (GO:0005739);;	--	--	predicted protein [Populus trichocarpa]
comp13363_c0	1	p3	(GGA)6	18	177	194	[KL]	--	Biological Process: mitotic cell cycle (GO:0000278);; Biological Process: regionalization (GO:0003002);; Molecular Function: DNA binding (GO:0003677);; Molecular Function: helicase activity (GO:0004386);; Molecular Function: protein binding (GO:0005515);; Molecular Function: ATP binding (GO:0005524);; Cellular Component: cell wall (GO:0005618);; Biological Process: chromatin remodeling (GO:000633…	--	Helicase SWR1 OS=Saccharomyces cerevisiae (strain ATCC 204508 / S288c) GN=SWR1 PE=1 SV=1	SNF2 domain-containing protein / helicase domain-containing protein isoform 1 [Theobroma cacao]
comp13364_c0	1	p2	(CT)9	18	1	18	--	--	Cellular Component: chloroplast (GO:0009507);;	--	Calmodulin-lysine N-methyltransferase OS=Rattus norvegicus GN=Camkmt PE=1 SV=1	PREDICTED: calmodulin-lysine N-methyltransferase-like isoform X3 [Setaria italica]
comp13365_c0	1	p3	(CAC)6	18	1	18	--	--	Molecular Function: nuclease activity (GO:0004518);; Cellular Component: nucleus (GO:0005634);; Biological Process: mRNA processing (GO:0006397);; Biological Process: RNA splicing (GO:0008380);; Biological Process: U6 snRNA 3'-end processing (GO:0034477);; Biological Process: photoperiodism, flowering (GO:0048573);; Biological Process: nucleic acid phosphodiester bond hydrolysis (GO:0090305);;	--	U6 snRNA phosphodiesterase OS=Mus musculus GN=Usb1 PE=2 SV=1	PREDICTED: UPF0406 protein C16orf57 homolog [Vitis vinifera]
comp1337_c0	1	p2	(CT)9	18	402	419	--	--	Cellular Component: plastid (GO:0009536);;	--	Uncharacterized proline-rich protein (Fragment) OS=Owenia fusiformis PE=4 SV=1	hypothetical protein VITISV_034767 [Vitis vinifera]
comp13371_c1	1	p1	(A)10	10	358	367	#N/A	#N/A	#N/A	#N/A	#N/A	#N/A
comp13377_c0	1	p1	(T)20	20	586	605	#N/A	#N/A	#N/A	#N/A	#N/A	#N/A
comp13379_c0	1	p3	(AAG)5	15	308	322	#N/A	#N/A	#N/A	#N/A	#N/A	#N/A
comp13383_c0	1	p3	(TGC)5	15	1706	1720	--	--	Cellular Component: intracellular membrane-bounded organelle (GO:0043231);; Cellular Component: cytoplasmic part (GO:0044444);;	--	Putative protein TPRXL OS=Homo sapiens GN=TPRXL PE=5 SV=2	PREDICTED: uncharacterized protein LOC101773559 [Setaria italica]
comp13387_c0	1	p2	(CT)8	16	906	921	--	--	--	--	Regulatory protein E2 OS=Human papillomavirus type 25 GN=E2 PE=3 SV=1	6,7-dimethyl-8-ribityllumazine synthase [Theobroma cacao]
comp1339_c0	1	p2	(TC)8	16	83	98	[P]	Inorganic ion transport and metabolism	Cellular Component: mitochondrion (GO:0005739);; Cellular Component: vacuolar membrane (GO:0005774);; Cellular Component: peroxisomal membrane (GO:0005778);; Cellular Component: Golgi apparatus (GO:0005794);; Cellular Component: cytosol (GO:0005829);; Biological Process: response to oxidative stress (GO:0006979);; Cellular Component: plasmodesma (GO:0009506);; Cellular Component: chloroplast enve…	K00434|1e-171|rcu:RCOM_0491260|L-ascorbate peroxidase 1, cytosolic, putative (EC:1.11.1.11)	L-ascorbate peroxidase 3, peroxisomal OS=Arabidopsis thaliana GN=APX3 PE=2 SV=1	ascorbate peroxidase [Zantedeschia aethiopica]
comp13394_c0	1	p1	(A)15	15	708	722	[R]	General function prediction only	Cellular Component: nucleus (GO:0005634);; Biological Process: mRNA modification (GO:0016556);;	--	Rhodanese-like domain-containing protein 8, chloroplastic OS=Arabidopsis thaliana GN=STR8 PE=2 SV=1	unnamed protein product [Vitis vinifera]
comp13397_c0	1	p2	(GA)8	16	782	797	--	--	--	--	--	hypothetical protein OsI_34060 [Oryza sativa Indica Group]
comp13406_c0	1	p1	(A)15	15	1390	1404	--	--	Biological Process: cellular aromatic compound metabolic process (GO:0006725);; Molecular Function: transferase activity, transferring phosphorus-containing groups (GO:0016772);; Biological Process: cellular nitrogen compound metabolic process (GO:0034641);; Biological Process: primary metabolic process (GO:0044238);; Biological Process: cellular macromolecule metabolic process (GO:0044260);; Bio…	--	--	hypothetical protein VITISV_029750 [Vitis vinifera]
comp13411_c0	1	p3	(CGG)5	15	209	223	--	--	Cellular Component: chloroplast thylakoid membrane (GO:0009535);; Cellular Component: chloroplast envelope (GO:0009941);;	--	Atherin OS=Oryctolagus cuniculus GN=SAMD1 PE=2 SV=1	PREDICTED: uncharacterized protein LOC100242841 [Vitis vinifera]
comp13414_c0	2	p1	(T)11	11	3208	3218	--	--	--	--	--	TPA: hypothetical protein ZEAMMB73_795034 [Zea mays]
comp13414_c0	1	p3	(CTG)6	18	33	50	--	--	--	--	--	TPA: hypothetical protein ZEAMMB73_795034 [Zea mays]
comp13418_c0	2	p1	(T)16	16	601	616	#N/A	#N/A	#N/A	#N/A	#N/A	#N/A
comp13418_c0	1	p3	(AGG)6	18	56	73	#N/A	#N/A	#N/A	#N/A	#N/A	#N/A
comp13419_c0	1	p2	(CT)6	12	1106	1117	[J]	Translation, ribosomal structure and biogenesis	Molecular Function: mannose-6-phosphate isomerase activity (GO:0004476);; Molecular Function: protein binding (GO:0005515);; Cellular Component: mitochondrion (GO:0005739);; Cellular Component: cytosol (GO:0005829);; Biological Process: response to blue light (GO:0009637);; Biological Process: response to absence of light (GO:0009646);; Biological Process: response to sucrose (GO:0009744);; Biolo…	--	Uncharacterized protein At1g66480 OS=Arabidopsis thaliana GN=At1g66480 PE=1 SV=1	PREDICTED: uncharacterized protein At1g66480-like [Brachypodium distachyon]
comp13420_c0	1	p1	(A)10	10	342	351	#N/A	#N/A	#N/A	#N/A	#N/A	#N/A
comp13420_c0	2	p1	(T)10	10	2248	2257	#N/A	#N/A	#N/A	#N/A	#N/A	#N/A
comp13421_c0	1	p2	(AG)8	16	367	382	--	--	Biological Process: RNA splicing, via endonucleolytic cleavage and ligation (GO:0000394);; Molecular Function: inositol hexakisphosphate binding (GO:0000822);; Biological Process: response to molecule of bacterial origin (GO:0002237);; Molecular Function: ubiquitin-protein ligase activity (GO:0004842);; Cellular Component: nucleus (GO:0005634);; Cellular Component: vacuolar membrane (GO:0005774);…	--	Protein AUXIN SIGNALING F-BOX 2 OS=Arabidopsis thaliana GN=AFB2 PE=1 SV=1	predicted protein [Arabidopsis lyrata subsp. lyrata]
comp13422_c0	1	p2	(GA)9	18	1	18	--	--	--	--	Putative protein TPRXL OS=Homo sapiens GN=TPRXL PE=5 SV=2	Uncharacterized protein TCM_046898 [Theobroma cacao]
comp13430_c0	1	p3	(CAC)5	15	69	83	--	--	--	--	ABC transporter G family member 5 OS=Arabidopsis thaliana GN=ABCG5 PE=2 SV=1	PREDICTED: ABC transporter G family member 5-like [Cicer arietinum]
comp13432_c0	1	p1	(T)12	12	108	119	#N/A	#N/A	#N/A	#N/A	#N/A	#N/A
comp13436_c0	1	p1	(T)12	12	1099	1110	#N/A	#N/A	#N/A	#N/A	#N/A	#N/A
comp13437_c0	1	p2	(CT)6	12	626	637	[R]	General function prediction only	Molecular Function: Rab GTPase activator activity (GO:0005097);; Cellular Component: plastid (GO:0009536);; Biological Process: positive regulation of Rab GTPase activity (GO:0032851);;	--	TBC1 domain family member 13 OS=Mus musculus GN=Tbc1d13 PE=2 SV=1	hypothetical protein PRUPE_ppa005462mg [Prunus persica]
comp1344_c1	1	p1	(A)10	10	967	976	[M]	Cell wall/membrane/envelope biogenesis	Molecular Function: nucleotide binding (GO:0000166);; Cellular Component: cytosol (GO:0005829);; Molecular Function: dTDP-glucose 4,6-dehydratase activity (GO:0008460);; Molecular Function: dTDP-4-dehydrorhamnose reductase activity (GO:0008831);; Cellular Component: plasmodesma (GO:0009506);; Cellular Component: chloroplast (GO:0009507);; Biological Process: response to sucrose (GO:0009744);; Bio…	K12450|8e-45|pop:POPTR_828544|UDP-glucose 4,6-dehydratase (EC:4.2.1.76)	Probable rhamnose biosynthetic enzyme 3 OS=Arabidopsis thaliana GN=RHM3 PE=1 SV=1	Rhamnose biosynthesis 1 [Theobroma cacao]
comp13440_c0	1	p1	(A)10	10	3824	3833	#N/A	#N/A	#N/A	#N/A	#N/A	#N/A
comp13448_c0	1	p2	(CT)9	18	1	18	[Z]	Cytoskeleton	Molecular Function: nucleotide binding (GO:0000166);; Cellular Component: microtubule cytoskeleton (GO:0015630);; Cellular Component: protein complex (GO:0043234);; Cellular Component: cytoskeletal part (GO:0044430);;	--	Kinesin-4 OS=Arabidopsis thaliana GN=ATK4 PE=1 SV=2	kinesin-related protein [Gossypium hirsutum]
comp13449_c0	1	p1	(T)10	10	1700	1709	--	--	Molecular Function: transferase activity (GO:0016740);;	--	Malonyl-coenzyme A:anthocyanin 3-O-glucoside-6&apos;&apos;-O-malonyltransferase OS=Dahlia pinnata GN=3MAT PE=1 SV=1	hypothetical protein OsI_25739 [Oryza sativa Indica Group]
comp13452_c0	1	p1	(T)14	14	1222	1235	#N/A	#N/A	#N/A	#N/A	#N/A	#N/A
comp13461_c0	1	p3	(TCT)5	15	157	171	#N/A	#N/A	#N/A	#N/A	#N/A	#N/A
comp13463_c0	1	p3	(GCC)5	15	530	544	--	--	Molecular Function: catalytic activity (GO:0003824);; Biological Process: biosynthetic process (GO:0009058);; Cellular Component: chloroplast (GO:0009507);; Molecular Function: amino acid binding (GO:0016597);; Molecular Function: pyridoxal phosphate binding (GO:0030170);;	--	Putative protein TPRXL OS=Homo sapiens GN=TPRXL PE=5 SV=2	predicted protein [Populus trichocarpa]
comp13470_c0	1	p3	(GGC)5	15	189	203	--	--	Cellular Component: plastid (GO:0009536);;	--	Cytosolic 5&apos;-nucleotidase 3 OS=Danio rerio GN=nt5c3 PE=2 SV=2	5&apos;-nucleotidase / magnesium ion binding protein isoform 2 [Theobroma cacao]
comp13473_c0	1	p3	(CTC)6	18	60	77	--	--	Molecular Function: calmodulin binding (GO:0005516);; Cellular Component: nucleus (GO:0005634);; Biological Process: response to auxin (GO:0009733);; Biological Process: single-organism cellular process (GO:0044763);;	K14488|8e-60|rcu:RCOM_0709300|Indole-3-acetic acid-induced protein ARG7, putative	Auxin-induced protein X15 OS=Glycine max PE=2 SV=1	Indole-3-acetic acid-induced protein ARG7, putative [Ricinus communis]
comp13475_c0	1	p2	(TC)8	16	44	59	#N/A	#N/A	#N/A	#N/A	#N/A	#N/A
comp13475_c0	2	p2	(TC)8	16	336	351	#N/A	#N/A	#N/A	#N/A	#N/A	#N/A
comp13476_c0	1	p3	(TGC)6	18	464	481	#N/A	#N/A	#N/A	#N/A	#N/A	#N/A
comp13477_c0	1	p1	(T)11	11	191	201	[RTKL]	--	Molecular Function: nucleotide binding (GO:0000166);; Molecular Function: protein kinase activity (GO:0004672);; Biological Process: protein phosphorylation (GO:0006468);; Biological Process: defense response (GO:0006952);; Biological Process: signal transduction (GO:0007165);; Biological Process: cellular biosynthetic process (GO:0044249);; Biological Process: response to other organism (GO:0051…	--	Mitogen-activated protein kinase kinase 5 OS=Arabidopsis thaliana GN=MKK5 PE=1 SV=2	PREDICTED: mitogen-activated protein kinase kinase 4-like [Cucumis sativus]
comp13477_c0	2	p3	(GGC)6	18	1211	1228	[RTKL]	--	Molecular Function: nucleotide binding (GO:0000166);; Molecular Function: protein kinase activity (GO:0004672);; Biological Process: protein phosphorylation (GO:0006468);; Biological Process: defense response (GO:0006952);; Biological Process: signal transduction (GO:0007165);; Biological Process: cellular biosynthetic process (GO:0044249);; Biological Process: response to other organism (GO:0051…	--	Mitogen-activated protein kinase kinase 5 OS=Arabidopsis thaliana GN=MKK5 PE=1 SV=2	PREDICTED: mitogen-activated protein kinase kinase 4-like [Cucumis sativus]
comp1348_c0	1	p1	(G)21	21	1	21	--	--	--	--	Proline-rich receptor-like protein kinase PERK14 OS=Arabidopsis thaliana GN=PERK14 PE=2 SV=1	hypothetical protein OsJ_03387 [Oryza sativa Japonica Group]
comp13484_c0	1	p3	(TCT)7	21	1	21	#N/A	#N/A	#N/A	#N/A	#N/A	#N/A
comp13484_c0	2	p3	(CTC)5	15	275	289	#N/A	#N/A	#N/A	#N/A	#N/A	#N/A
comp13487_c0	1	p2	(TC)6	12	327	338	--	--	--	--	--	PREDICTED: uncharacterized protein LOC101772414 [Setaria italica]
comp1349_c0	1	c	(A)11----(CT)8	39	222	260	--	--	--	--	Protein GAST1 OS=Solanum lycopersicum GN=GAST1 PE=2 SV=1	PREDICTED: protein GAST1-like isoform X1 [Setaria italica]
comp13502_c0	1	p1	(T)10	10	2521	2530	--	--	--	--	Pentatricopeptide repeat-containing protein At3g09060 OS=Arabidopsis thaliana GN=At3g09060 PE=2 SV=1	PREDICTED: pentatricopeptide repeat-containing protein At3g09060-like isoform 1 [Brachypodium distachyon]
comp13502_c0	2	p1	(A)12	12	2668	2679	--	--	--	--	Pentatricopeptide repeat-containing protein At3g09060 OS=Arabidopsis thaliana GN=At3g09060 PE=2 SV=1	PREDICTED: pentatricopeptide repeat-containing protein At3g09060-like isoform 1 [Brachypodium distachyon]
comp13510_c0	1	p3	(CTC)7	21	580	600	--	--	--	--	Uncharacterized protein ORF3 OS=Grapevine fleck virus (isolate Italy/MT48) GN=ORF3 PE=4 SV=1	PREDICTED: uncharacterized protein LOC100262535 [Vitis vinifera]
comp13513_c0	1	p3	(TCC)6	18	2046	2063	[RTKL]	--	Molecular Function: nucleotide binding (GO:0000166);; Molecular Function: protein serine/threonine kinase activity (GO:0004674);; Biological Process: phosphorylation (GO:0016310);;	--	CBL-interacting serine/threonine-protein kinase 21 OS=Arabidopsis thaliana GN=CIPK21 PE=1 SV=1	CBL-interacting protein kinase 14 [Vitis vinifera]
comp13517_c0	1	p3	(GAG)5	15	1667	1681	--	--	Molecular Function: DNA binding (GO:0003677);; Molecular Function: sequence-specific DNA binding transcription factor activity (GO:0003700);; Cellular Component: nucleus (GO:0005634);; Biological Process: regulation of transcription, DNA-templated (GO:0006355);; Biological Process: pattern specification process (GO:0007389);; Biological Process: auxin-activated signaling pathway (GO:0009734);; Bi…	--	Auxin response factor 22 OS=Oryza sativa subsp. japonica GN=ARF22 PE=2 SV=1	hypothetical protein PRUPE_ppa002195mg [Prunus persica]
comp13523_c0	1	p1	(G)10	10	1090	1099	--	--	Biological Process: microtubule cytoskeleton organization (GO:0000226);; Biological Process: cytokinesis by cell plate formation (GO:0000911);; Biological Process: histone phosphorylation (GO:0016572);; Biological Process: regulation of cell proliferation (GO:0042127);;	--	--	PREDICTED: uncharacterized protein LOC100261455 [Vitis vinifera]
comp13530_c0	1	p2	(CT)6	12	49	60	--	--	Molecular Function: protein binding (GO:0005515);; Cellular Component: nucleus (GO:0005634);; Cellular Component: endosome (GO:0005768);; Biological Process: calcium-mediated signaling (GO:0019722);; Cellular Component: BLOC-1 complex (GO:0031083);; Biological Process: late endosome to vacuole transport (GO:0045324);; Biological Process: root development (GO:0048364);;	--	Biogenesis of lysosome-related organelles complex 1 subunit 1 OS=Arabidopsis thaliana GN=BLOS1 PE=1 SV=1	PREDICTED: biogenesis of lysosome-related organelles complex 1 subunit 1 [Vitis vinifera]
comp13532_c0	1	p1	(T)13	13	310	322	--	--	Molecular Function: DNA binding (GO:0003677);; Cellular Component: nucleus (GO:0005634);; Cellular Component: cytosol (GO:0005829);; Biological Process: regulation of transcription, DNA-templated (GO:0006355);; Biological Process: mitosis (GO:0007067);; Molecular Function: histone binding (GO:0042393);;	--	PHD finger protein ALFIN-LIKE 9 OS=Oryza sativa subsp. indica GN=OsI_26819 PE=2 SV=1	PREDICTED: PHD finger protein ALFIN-LIKE 9-like [Brachypodium distachyon]
comp13534_c0	1	p1	(T)15	15	541	555	#N/A	#N/A	#N/A	#N/A	#N/A	#N/A
comp13539_c0	1	p1	(A)10	10	129	138	[O]	Posttranslational modification, protein turnover, chaperones	Biological Process: metabolic process (GO:0008152);; Biological Process: response to light stimulus (GO:0009416);; Biological Process: cellular process (GO:0009987);; Molecular Function: oxidoreductase activity (GO:0016491);; Cellular Component: chloroplast part (GO:0044434);;	K07304|6e-37|ppp:PHYPADRAFT_106732|hypothetical protein	Peptide methionine sulfoxide reductase MsrA OS=Methanosarcina mazei (strain ATCC BAA-159 / DSM 3647 / Goe1 / Go1 / JCM 11833 / OCM 88) GN=msrA PE=3 SV=1	unnamed protein product [Vitis vinifera]
comp1354_c0	1	p2	(AG)6	12	1030	1041	--	--	Biological Process: phosphorelay signal transduction system (GO:0000160);; Molecular Function: signal transducer activity (GO:0004871);; Cellular Component: cytoplasmic membrane-bounded vesicle (GO:0016023);; Molecular Function: oxidoreductase activity (GO:0016491);;	K14490|3e-59|osa:4347886|Os09g0567400	Histidine-containing phosphotransfer protein 1 OS=Oryza sativa subsp. japonica GN=HP1 PE=1 SV=1	histidine-containing phosphotransfer protein [Wolffia australiana]
comp13544_c0	1	p3	(CGC)5	15	1809	1823	--	--	Biological Process: microtubule nucleation (GO:0007020);; Biological Process: response to blue light (GO:0009637);; Biological Process: regulation of proton transport (GO:0010155);; Cellular Component: cell part (GO:0044464);; Biological Process: protein autophosphorylation (GO:0046777);;	--	Mucin-5AC (Fragments) OS=Homo sapiens GN=MUC5AC PE=1 SV=3	BZIP domain class transcription factor [Theobroma cacao]
comp13545_c0	1	p2	(TC)9	18	381	398	--	--	--	--	--	hypothetical protein MTR_1g115780, partial [Medicago truncatula]
comp13547_c0	1	p2	(GA)9	18	6	23	#N/A	#N/A	#N/A	#N/A	#N/A	#N/A
comp1355_c0	1	c	(AG)11---(AG)7	56	114	169	--	--	Cellular Component: cytoplasm (GO:0005737);;	--	Serine/arginine repetitive matrix protein 3 OS=Mus musculus GN=Srrm3 PE=2 SV=1	PREDICTED: protein GDAP2 homolog [Fragaria vesca subsp. vesca]
comp1355_c0	2	c	(T)10---(AGA)5---(GCG)5	141	655	795	--	--	Cellular Component: cytoplasm (GO:0005737);;	--	Serine/arginine repetitive matrix protein 3 OS=Mus musculus GN=Srrm3 PE=2 SV=1	PREDICTED: protein GDAP2 homolog [Fragaria vesca subsp. vesca]
comp1355_c0	3	p3	(ACC)5	15	1138	1152	--	--	Cellular Component: cytoplasm (GO:0005737);;	--	Serine/arginine repetitive matrix protein 3 OS=Mus musculus GN=Srrm3 PE=2 SV=1	PREDICTED: protein GDAP2 homolog [Fragaria vesca subsp. vesca]
comp13552_c0	2	p1	(T)12	12	2772	2783	--	--	--	--	Autophagy-related protein 13 OS=Yarrowia lipolytica (strain CLIB 122 / E 150) GN=ATG13 PE=3 SV=1	unnamed protein product [Vitis vinifera]
comp13552_c0	1	p2	(TA)8	16	190	205	--	--	--	--	Autophagy-related protein 13 OS=Yarrowia lipolytica (strain CLIB 122 / E 150) GN=ATG13 PE=3 SV=1	unnamed protein product [Vitis vinifera]
comp13553_c0	1	p3	(AGA)6	18	1	18	--	--	--	K13153|7e-51|rcu:RCOM_0900820|hypothetical protein	U11/U12 small nuclear ribonucleoprotein 25 kDa protein OS=Homo sapiens GN=SNRNP25 PE=1 SV=1	conserved hypothetical protein [Ricinus communis]
comp13554_c0	1	p2	(TA)6	12	639	650	#N/A	#N/A	#N/A	#N/A	#N/A	#N/A
comp13557_c0	1	p2	(CT)8	16	662	677	#N/A	#N/A	#N/A	#N/A	#N/A	#N/A
comp13558_c0	1	p1	(T)10	10	54	63	--	--	Cellular Component: mitochondrion (GO:0005739);; Cellular Component: integral component of membrane (GO:0016021);;	--	TLC domain-containing protein 2 OS=Danio rerio GN=tlcd2 PE=2 SV=1	PREDICTED: TLC domain-containing protein 2-like [Setaria italica]
comp1356_c0	2	c	(TC)6g(CT)10	33	803	835	[O]	Posttranslational modification, protein turnover, chaperones	Molecular Function: ubiquitin-protein ligase activity (GO:0004842);; Molecular Function: ATP binding (GO:0005524);; Biological Process: protein ubiquitination (GO:0016567);; Biological Process: protein deubiquitination (GO:0016579);; Biological Process: DNA endoreduplication (GO:0042023);; Biological Process: proteasome-mediated ubiquitin-dependent protein catabolic process (GO:0043161);; Biologi…	K06689|6e-61|sbi:SORBI_02g019480|hypothetical protein	Ubiquitin-conjugating enzyme E2 5A OS=Oryza sativa subsp. japonica GN=UBC5A PE=2 SV=1	unknown [Picea sitchensis]
comp1356_c0	1	p1	(A)11	11	225	235	[O]	Posttranslational modification, protein turnover, chaperones	Molecular Function: ubiquitin-protein ligase activity (GO:0004842);; Molecular Function: ATP binding (GO:0005524);; Biological Process: protein ubiquitination (GO:0016567);; Biological Process: protein deubiquitination (GO:0016579);; Biological Process: DNA endoreduplication (GO:0042023);; Biological Process: proteasome-mediated ubiquitin-dependent protein catabolic process (GO:0043161);; Biologi…	K06689|6e-61|sbi:SORBI_02g019480|hypothetical protein	Ubiquitin-conjugating enzyme E2 5A OS=Oryza sativa subsp. japonica GN=UBC5A PE=2 SV=1	unknown [Picea sitchensis]
comp13565_c0	1	c*	(ATCT)5ac(CTAT)6(TA)10*	63	264	326	--	--	Biological Process: response to stimulus (GO:0050896);;	--	S-norcoclaurine synthase OS=Thalictrum flavum subsp. glaucum PE=1 SV=1	uncharacterized protein LOC100305838 [Glycine max]
comp13566_c0	1	p2	(CT)7	14	386	399	--	--	Biological Process: RNA splicing, via endonucleolytic cleavage and ligation (GO:0000394);; Molecular Function: calcium ion binding (GO:0005509);; Cellular Component: nucleus (GO:0005634);; Cellular Component: endosome (GO:0005768);; Cellular Component: Golgi apparatus (GO:0005794);; Cellular Component: trans-Golgi network (GO:0005802);; Cellular Component: plasma membrane (GO:0005886);; Biologica…	--	Uncharacterized TPR repeat-containing protein At1g05150 OS=Arabidopsis thaliana GN=At1g05150 PE=1 SV=1	hypothetical protein CARUB_v10012243mg [Capsella rubella]
comp13568_c0	1	p3	(GAA)5	15	492	506	[L]	Replication, recombination and repair	Molecular Function: RNA binding (GO:0003723);; Molecular Function: RNA-directed DNA polymerase activity (GO:0003964);; Cellular Component: mitochondrion (GO:0005739);; Biological Process: RNA-dependent DNA replication (GO:0006278);; Biological Process: mRNA processing (GO:0006397);; Biological Process: RNA splicing (GO:0008380);; Cellular Component: chloroplast (GO:0009507);;	--	Group II intron-encoded protein LtrA OS=Lactococcus lactis subsp. cremoris (strain MG1363) GN=ltrA PE=1 SV=1	PREDICTED: uncharacterized mitochondrial protein ymf11-like [Vitis vinifera]
comp13569_c0	2	c	(T)11---(T)10	44	837	880	#N/A	#N/A	#N/A	#N/A	#N/A	#N/A
comp13569_c0	1	p1	(T)11	11	423	433	#N/A	#N/A	#N/A	#N/A	#N/A	#N/A
comp13570_c0	1	p1	(A)14	14	2073	2086	--	--	Molecular Function: triglyceride lipase activity (GO:0004806);; Biological Process: lipid metabolic process (GO:0006629);;	--	--	PREDICTED: uncharacterized protein LOC100267577 [Vitis vinifera]
comp13571_c0	1	p2	(GA)6	12	307	318	#N/A	#N/A	#N/A	#N/A	#N/A	#N/A
comp13579_c0	1	p2	(CT)6	12	49	60	--	--	Cellular Component: mitochondrion (GO:0005739);; Biological Process: phosphatidylinositol biosynthetic process (GO:0006661);;	--	--	predicted protein [Populus trichocarpa]
comp13589_c0	1	p3	(CTG)6	18	267	284	[Q]	Secondary metabolites biosynthesis, transport and catabolism	Molecular Function: copper ion binding (GO:0005507);; Cellular Component: extracellular region (GO:0005576);; Cellular Component: plasma membrane (GO:0005886);; Molecular Function: L-ascorbate oxidase activity (GO:0008447);; Cellular Component: plasmodesma (GO:0009506);; Biological Process: oxidation-reduction process (GO:0055114);;	--	Monocopper oxidase-like protein SKS1 OS=Arabidopsis thaliana GN=SKS1 PE=1 SV=1	SKU5 similar 3 [Theobroma cacao]
comp13591_c0	1	p1	(A)10	10	496	505	--	--	Biological Process: microtubule cytoskeleton organization (GO:0000226);; Molecular Function: sphingomyelin phosphodiesterase activity (GO:0004767);; Molecular Function: GTP binding (GO:0005525);; Cellular Component: nucleolus (GO:0005730);; Cellular Component: spindle (GO:0005819);; Cellular Component: plasma membrane (GO:0005886);; Biological Process: small GTPase mediated signal transduction (G…	K04392|2e-18|vvi:100242140|similar to Rac-like GTP-binding protein RAC2	Rac-like GTP-binding protein RAC13 OS=Gossypium hirsutum GN=RAC13 PE=2 SV=1	PREDICTED: Rac-like GTP-binding protein ARAC5 [Vitis vinifera]
comp13594_c0	1	p4	(GATA)5	20	1682	1701	--	--	Molecular Function: binding (GO:0005488);; Cellular Component: intracellular (GO:0005622);; Biological Process: primary metabolic process (GO:0044238);; Biological Process: cellular macromolecule metabolic process (GO:0044260);;	--	Vegetative cell wall protein gp1 OS=Chlamydomonas reinhardtii GN=GP1 PE=2 SV=1	predicted protein [Hordeum vulgare subsp. vulgare]
comp13599_c0	1	p2	(GA)10	20	1972	1991	#N/A	#N/A	#N/A	#N/A	#N/A	#N/A
comp13600_c0	1	p3	(AGA)5	15	1989	2003	--	--	--	--	E3 ubiquitin-protein ligase CIP8 OS=Arabidopsis thaliana GN=CIP8 PE=1 SV=1	zinc finger protein, putative [Ricinus communis]
comp13602_c0	1	p1	(A)13	13	1060	1072	--	--	--	--	Uncharacterized serine-rich protein C215.13 OS=Schizosaccharomyces pombe (strain 972 / ATCC 24843) GN=SPBC215.13 PE=1 SV=1	glycoside hydrolase family 16 [Ophiostoma piceae UAMH 11346]
comp13606_c0	1	p2	(AG)6	12	2720	2731	--	--	Biological Process: RNA metabolic process (GO:0016070);; Molecular Function: isomerase activity (GO:0016853);;	--	Programmed cell death protein 4 OS=Gallus gallus GN=PDCD4 PE=2 SV=1	hypothetical protein PRUPE_ppa025873mg [Prunus persica]
comp13611_c0	1	p3	(CAG)5	15	7	21	--	--	--	--	Transcription factor bHLH130 OS=Arabidopsis thaliana GN=BHLH130 PE=1 SV=1	PREDICTED: transcription factor bHLH130-like [Vitis vinifera]
comp13613_c0	1	p1	(A)14	14	2674	2687	--	--	Molecular Function: inorganic anion exchanger activity (GO:0005452);; Cellular Component: endosome (GO:0005768);; Cellular Component: vacuole (GO:0005773);; Biological Process: response to boron-containing substance (GO:0010036);; Cellular Component: integral component of membrane (GO:0016021);; Cellular Component: lateral plasma membrane (GO:0016328);; Biological Process: borate transmembrane tr…	--	Probable boron transporter 2 OS=Arabidopsis thaliana GN=BOR2 PE=2 SV=1	unnamed protein product [Vitis vinifera]
comp13615_c0	1	p2	(GA)6	12	1	12	[R]	General function prediction only	Molecular Function: serine-type endopeptidase activity (GO:0004252);; Cellular Component: integral component of membrane (GO:0016021);;	--	Rhomboid protein 2 OS=Schizosaccharomyces pombe (strain 972 / ATCC 24843) GN=rbd2 PE=3 SV=2	PREDICTED: uncharacterized protein LOC100252469 [Vitis vinifera]
comp1362_c0	1	p3	(CTC)5	15	56	70	[J]	Translation, ribosomal structure and biogenesis	Molecular Function: endoribonuclease activity (GO:0004521);; Cellular Component: extracellular region (GO:0005576);; Cellular Component: vacuole (GO:0005773);; Cellular Component: endoplasmic reticulum (GO:0005783);; Biological Process: aging (GO:0007568);; Cellular Component: ER body (GO:0010168);; Biological Process: negative regulation of autophagy (GO:0010507);; Biological Process: rRNA catab…	--	Ribonuclease 2 OS=Arabidopsis thaliana GN=RNS2 PE=2 SV=1	PREDICTED: ribonuclease 2-like [Glycine max]
comp13621_c0	1	p1	(C)10	10	1223	1232	[U]	Intracellular trafficking, secretion, and vesicular transport	--	--	Serine/arginine repetitive matrix protein 1 OS=Pongo abelii GN=SRRM1 PE=2 SV=1	unnamed protein product [Vitis vinifera]
comp13622_c0	1	p1	(T)10	10	132	141	--	--	Cellular Component: nucleolus (GO:0005730);; Biological Process: cellular process (GO:0009987);;	--	Mucin-2 OS=Homo sapiens GN=MUC2 PE=1 SV=2	PREDICTED: uncharacterized protein LOC100257068 [Vitis vinifera]
comp13624_c0	1	p1	(A)14	14	2509	2522	#N/A	#N/A	#N/A	#N/A	#N/A	#N/A
comp13632_c0	1	p2	(TA)11	22	1696	1717	#N/A	#N/A	#N/A	#N/A	#N/A	#N/A
comp13636_c0	1	p2	(TC)6	12	21	32	--	--	Molecular Function: DNA binding (GO:0003677);; Cellular Component: nucleus (GO:0005634);; Cellular Component: cytosol (GO:0005829);; Biological Process: regulation of transcription, DNA-templated (GO:0006355);; Molecular Function: zinc ion binding (GO:0008270);; Molecular Function: methylated histone residue binding (GO:0035064);;	--	PHD finger protein ALFIN-LIKE 5 OS=Arabidopsis thaliana GN=AL5 PE=2 SV=1	ALF domain class transcription factor [Theobroma cacao]
comp13639_c0	1	p1	(T)14	14	11	24	#N/A	#N/A	#N/A	#N/A	#N/A	#N/A
comp13640_c0	2	p1	(A)11	11	3172	3182	--	--	--	--	Vegetative cell wall protein gp1 OS=Chlamydomonas reinhardtii GN=GP1 PE=2 SV=1	PREDICTED: uncharacterized protein LOC100255603 [Vitis vinifera]
comp13640_c0	1	p2	(TC)10	20	1	20	--	--	--	--	Vegetative cell wall protein gp1 OS=Chlamydomonas reinhardtii GN=GP1 PE=2 SV=1	PREDICTED: uncharacterized protein LOC100255603 [Vitis vinifera]
comp13648_c0	1	p1	(T)10	10	1736	1745	--	--	Cellular Component: nucleus (GO:0005634);;	--	Transcription factor bHLH7 OS=Arabidopsis thaliana GN=BHLH7 PE=2 SV=1	BHLH transcription factor [Zea mays]
comp1365_c0	1	p1	(T)11	11	43	53	--	--	Molecular Function: translation initiation factor activity (GO:0003743);; Cellular Component: cytoplasm (GO:0005737);; Biological Process: translational initiation (GO:0006413);; Biological Process: posttranscriptional gene silencing by RNA (GO:0035194);; Biological Process: single-organism developmental process (GO:0044767);; Biological Process: innate immune response (GO:0045087);; Biological P…	--	Protein argonaute 1B OS=Oryza sativa subsp. japonica GN=AGO1B PE=2 SV=3	hypothetical protein PRUPE_ppa000619mg [Prunus persica]
comp13650_c0	1	p2	(CT)10	20	1	20	--	--	Biological Process: cytokinesis (GO:0000910);; Cellular Component: spindle (GO:0005819);; Molecular Function: microtubule binding (GO:0008017);; Cellular Component: plasmodesma (GO:0009506);; Cellular Component: phragmoplast (GO:0009524);; Cellular Component: preprophase band (GO:0009574);; Biological Process: microtubule polymerization (GO:0046785);; Cellular Component: cortical microtubule (GO:…	--	65-kDa microtubule-associated protein 5 OS=Arabidopsis thaliana GN=MAP65-5 PE=1 SV=2	unnamed protein product [Vitis vinifera]
comp13651_c0	1	p3	(CAC)5	15	335	349	--	--	Molecular Function: copper ion binding (GO:0005507);; Molecular Function: electron carrier activity (GO:0009055);;	--	Early nodulin-like protein 1 OS=Oryza sativa subsp. japonica GN=ENODL1 PE=1 SV=1	Early nodulin-like protein 3, putative [Theobroma cacao]
comp13653_c0	1	p1	(T)10	10	157	166	#N/A	#N/A	#N/A	#N/A	#N/A	#N/A
comp13656_c0	1	p1	(A)19	19	1	19	--	--	Cellular Component: membrane (GO:0016020);;	--	--	Os02g0703300 [Oryza sativa Japonica Group]
comp13660_c0	1	p1	(T)11	11	382	392	#N/A	#N/A	#N/A	#N/A	#N/A	#N/A
comp13668_c0	1	p3	(GGA)6	18	825	842	--	--	Molecular Function: protein binding (GO:0005515);;	--	Guanine nucleotide-binding protein subunit gamma 1 OS=Arabidopsis thaliana GN=GG1 PE=1 SV=1	predicted protein [Hordeum vulgare subsp. vulgare]
comp1368_c0	1	p2	(GT)8	16	1039	1054	--	--	Cellular Component: nucleus (GO:0005634);; Biological Process: regulation of mitotic cell cycle (GO:0007346);; Molecular Function: cysteine-type peptidase activity (GO:0008234);; Cellular Component: plastid (GO:0009536);; Biological Process: gravitropism (GO:0009630);; Biological Process: histone deubiquitination (GO:0016578);; Molecular Function: nucleosome binding (GO:0031491);; Molecular Funct…	K12655|1e-139|vvi:100246727|hypothetical protein LOC100246727	OTU domain-containing protein 5 OS=Rattus norvegicus GN=Otud5 PE=2 SV=2	unnamed protein product [Vitis vinifera]
comp1368_c0	2	p2	(GA)11	22	4068	4089	--	--	Cellular Component: nucleus (GO:0005634);; Biological Process: regulation of mitotic cell cycle (GO:0007346);; Molecular Function: cysteine-type peptidase activity (GO:0008234);; Cellular Component: plastid (GO:0009536);; Biological Process: gravitropism (GO:0009630);; Biological Process: histone deubiquitination (GO:0016578);; Molecular Function: nucleosome binding (GO:0031491);; Molecular Funct…	K12655|1e-139|vvi:100246727|hypothetical protein LOC100246727	OTU domain-containing protein 5 OS=Rattus norvegicus GN=Otud5 PE=2 SV=2	unnamed protein product [Vitis vinifera]
comp13680_c0	1	p1	(A)12	12	31	42	--	--	Cellular Component: mitochondrion (GO:0005739);; Cellular Component: endosome (GO:0005768);; Cellular Component: Golgi apparatus (GO:0005794);; Cellular Component: trans-Golgi network (GO:0005802);; Biological Process: response to nitrate (GO:0010167);; Biological Process: nitrate transport (GO:0015706);;	--	Glucuronoxylan 4-O-methyltransferase 1 OS=Arabidopsis thaliana GN=GXM1 PE=1 SV=1	unnamed protein product [Vitis vinifera]
comp13680_c0	2	p2	(TC)10	20	1016	1035	--	--	Cellular Component: mitochondrion (GO:0005739);; Cellular Component: endosome (GO:0005768);; Cellular Component: Golgi apparatus (GO:0005794);; Cellular Component: trans-Golgi network (GO:0005802);; Biological Process: response to nitrate (GO:0010167);; Biological Process: nitrate transport (GO:0015706);;	--	Glucuronoxylan 4-O-methyltransferase 1 OS=Arabidopsis thaliana GN=GXM1 PE=1 SV=1	unnamed protein product [Vitis vinifera]
comp1369_c0	1	p1	(A)13	13	214	226	--	--	Cellular Component: nucleus (GO:0005634);; Cellular Component: cytosol (GO:0005829);; Cellular Component: plasma membrane (GO:0005886);; Biological Process: response to abscisic acid (GO:0009737);;	--	Stem-specific protein TSJT1 OS=Nicotiana tabacum GN=TSJT1 PE=2 SV=1	Aluminum induced protein with YGL and LRDR motifs isoform 1 [Theobroma cacao]
comp13690_c0	1	p1	(T)15	15	193	207	#N/A	#N/A	#N/A	#N/A	#N/A	#N/A
comp13690_c0	2	p1	(T)15	15	1474	1488	#N/A	#N/A	#N/A	#N/A	#N/A	#N/A
comp13694_c0	1	p2	(TC)6	12	255	266	#N/A	#N/A	#N/A	#N/A	#N/A	#N/A
comp13698_c0	1	p2	(AG)10	20	1	20	--	--	--	--	--	hypothetical protein PRUPE_ppa017202mg, partial [Prunus persica]
comp13701_c0	1	p1	(T)10	10	1992	2001	--	--	Biological Process: embryo development ending in seed dormancy (GO:0009793);;	--	Pentatricopeptide repeat-containing protein At4g39620, chloroplastic OS=Arabidopsis thaliana GN=EMB2453 PE=2 SV=1	PREDICTED: pentatricopeptide repeat-containing protein At4g39620, chloroplastic [Vitis vinifera]
comp13703_c0	1	p2	(AT)8	16	1266	1281	#N/A	#N/A	#N/A	#N/A	#N/A	#N/A
comp13705_c0	1	p2	(CT)7	14	235	248	[J]	Translation, ribosomal structure and biogenesis	--	--	Translation initiation factor IF-2 OS=Rhodococcus sp. (strain RHA1) GN=infB PE=3 SV=1	hypothetical protein RCOM_0460020 [Ricinus communis]
comp13706_c0	1	p1	(A)12	12	15	26	--	--	--	--	--	hypothetical protein PRUPE_ppa021915mg, partial [Prunus persica]
comp13708_c0	1	c	(A)11---(AT)6	72	1573	1644	#N/A	#N/A	#N/A	#N/A	#N/A	#N/A
comp1371_c0	1	p3	(TCT)5	15	116	130	--	--	Molecular Function: diacylglycerol kinase activity (GO:0004143);; Biological Process: protein kinase C-activating G-protein coupled receptor signaling pathway (GO:0007205);; Cellular Component: chloroplast (GO:0009507);; Biological Process: phosphorylation (GO:0016310);;	--	Diacylglycerol kinase 5 OS=Arabidopsis thaliana GN=DGK5 PE=2 SV=1	diacylglycerol kinase, alpha, putative [Ricinus communis]
comp13715_c0	1	p3	(AGG)7	21	1	21	#N/A	#N/A	#N/A	#N/A	#N/A	#N/A
comp13719_c0	1	p3	(GGC)5	15	755	769	--	--	--	--	Serine/arginine repetitive matrix protein 2 OS=Homo sapiens GN=SRRM2 PE=1 SV=2	PREDICTED: uncharacterized protein LOC101303268 isoform 1 [Fragaria vesca subsp. vesca]
comp13721_c0	1	p2	(AG)10	20	1	20	--	--	Cellular Component: plastid (GO:0009536);;	--	--	unnamed protein product [Vitis vinifera]
comp13727_c0	1	p3	(AGG)5	15	1	15	--	--	--	--	Coiled-coil domain-containing protein 97 OS=Homo sapiens GN=CCDC97 PE=1 SV=1	PREDICTED: uncharacterized protein LOC100257446 [Vitis vinifera]
comp13730_c0	1	p1	(A)11	11	1	11	--	--	Molecular Function: iron ion transmembrane transporter activity (GO:0005381);; Biological Process: nickel cation transport (GO:0015675);; Cellular Component: integral component of membrane (GO:0016021);; Biological Process: iron ion transmembrane transport (GO:0034755);; Cellular Component: cell part (GO:0044464);;	K14685|1e-134|vvi:100248163|hypothetical protein LOC100248163	Solute carrier family 40 member 2 OS=Arabidopsis thaliana GN=IREG2 PE=2 SV=1	PREDICTED: solute carrier family 40 member 1-like [Vitis vinifera]
comp13743_c0	1	p1	(A)15	15	1	15	#N/A	#N/A	#N/A	#N/A	#N/A	#N/A
comp13744_c0	1	p2	(AT)6	12	439	450	--	--	--	--	--	PREDICTED: uncharacterized protein LOC101501275 [Cicer arietinum]
comp13745_c0	1	p2	(AG)6	12	18	29	--	--	--	--	Basic proline-rich protein OS=Sus scrofa PE=1 SV=2	Uncharacterized protein TCM_005343 [Theobroma cacao]
comp13745_c0	2	p3	(GTG)7	21	758	778	--	--	--	--	Basic proline-rich protein OS=Sus scrofa PE=1 SV=2	Uncharacterized protein TCM_005343 [Theobroma cacao]
comp1375_c0	1	p2	(CT)7	14	1618	1631	[U]	Intracellular trafficking, secretion, and vesicular transport	Cellular Component: plasma membrane (GO:0005886);; Molecular Function: protein transporter activity (GO:0008565);; Biological Process: protein transport (GO:0015031);; Cellular Component: integral component of membrane (GO:0016021);;	K12275|1e-177|osa:4329219|Os02g0435000	Translocation protein sec62 OS=Schizosaccharomyces pombe (strain 972 / ATCC 24843) GN=sec62 PE=3 SV=1	Os02g0435000 [Oryza sativa Japonica Group]
comp13752_c0	1	p2	(AT)9	18	612	629	#N/A	#N/A	#N/A	#N/A	#N/A	#N/A
comp13755_c0	1	p1	(A)10	10	370	379	#N/A	#N/A	#N/A	#N/A	#N/A	#N/A
comp13771_c0	1	p1	(A)10	10	53	62	--	--	Cellular Component: cytosol (GO:0005829);;	--	Cation transport regulator-like protein 2 OS=Xenopus laevis GN=chac2 PE=2 SV=1	ChaC-like family protein isoform 1 [Theobroma cacao]
comp13775_c0	1	p1	(C)12	12	1	12	--	--	Cellular Component: mitochondrion (GO:0005739);; Biological Process: phosphatidylinositol biosynthetic process (GO:0006661);;	--	--	PREDICTED: uncharacterized protein LOC100830920 [Brachypodium distachyon]
comp13777_c0	1	p2	(GT)6	12	457	468	--	--	--	--	--	Uncharacterized protein TCM_034555 [Theobroma cacao]
comp1378_c0	1	p1	(T)10	10	1992	2001	--	--	Molecular Function: nucleotide binding (GO:0000166);; Molecular Function: RNA binding (GO:0003723);; Molecular Function: RNA-directed DNA polymerase activity (GO:0003964);; Biological Process: RNA-dependent DNA replication (GO:0006278);; Biological Process: vesicle-mediated transport (GO:0016192);;	--	--	PREDICTED: protein vip1 [Vitis vinifera]
comp13782_c0	1	p2	(TG)9	18	616	633	--	--	--	--	--	PREDICTED: nuclear transcription factor Y subunit B-3-like [Brachypodium distachyon]
comp13785_c0	1	p2	(TC)7	14	1051	1064	#N/A	#N/A	#N/A	#N/A	#N/A	#N/A
[truncated: 8,035 more rows]
