# Supplementary material for: Transcriptome analysis of colored calla lily (Zantedeschia rehmannii Engl.) by Illumina sequencing: de novo assembly, annotation and EST-SSR marker development
Source: PeerJ. 2016 Sep 1;4:e2378. doi: 10.7717/peerj.2378 (PMC5012260; doi:10.7717/peerj.2378)
Supplement: Table S5 [file peerj-04-2378-s006.xlsx]

## Sheet: Sheet1
Table S6 List of SNP variation identified in the unigenes of colored calla lily ‘Rehmannii’
Chrom	Position	Ref	Cons	Reads1	Reads2	VarFreq	Strands1	Strands2	Qual1	Qual2	Pvalue	MapQual1	MapQual2	Reads1Plus	Reads1Minus	Reads2Plus	Reads2Minus	VarAllele
comp0_c0	2835	A	W	19397	9168	0.321	2	2	36	36	0.98	1	1	10217	9180	4432	4736	T
comp1017_c0	1240	G	R	22	31	0.5849	1	2	37	37	0.98	1	1	22	0	23	8	A
comp1017_c0	1244	C	Y	22	28	0.56	1	2	37	37	0.98	1	1	22	0	20	8	T
comp1017_c0	1256	C	Y	27	18	0.4	1	2	38	37	0.98	1	1	27	0	13	5	T
comp1023_c0	270	G	A	3	26	0.8966	2	2	38	37	0.98	1	1	2	1	13	13	A
comp1023_c0	280	T	A	5	20	0.8	2	2	40	35	0.98	1	1	4	1	7	13	A
comp1023_c0	297	C	T	5	20	0.8	2	2	37	38	0.98	1	1	4	1	9	11	T
comp1023_c0	300	C	A	5	20	0.8	2	2	38	39	0.98	1	1	4	1	9	11	A
comp1023_c0	314	G	A	4	19	0.8261	2	2	34	38	0.98	1	1	3	1	10	9	A
comp1023_c0	1491	C	Y	10	7	0.4118	1	2	35	33	0.98	1	1	0	10	4	3	T
comp1028_c0	685	T	W	88	87	0.4971	2	2	35	35	0.98	1	1	48	40	17	70	A
comp1028_c0	687	G	S	91	86	0.4859	2	2	36	36	0.98	1	1	51	40	16	70	C
comp1028_c0	696	C	S	104	83	0.4439	2	2	35	36	0.98	1	1	63	41	15	68	G
comp1028_c0	699	G	S	105	83	0.4415	2	2	36	36	0.98	1	1	65	40	11	72	C
comp1028_c0	705	G	S	108	79	0.4225	2	2	36	38	0.98	1	1	66	42	10	69	C
comp1053_c0	13	G	R	8	7	0.4667	1	2	36	33	0.98	1	1	8	0	2	5	A
comp1054_c0	564	T	Y	18	11	0.3793	2	2	36	37	0.98	1	1	8	10	7	4	C
comp1054_c0	901	T	Y	42	18	0.3	2	2	36	37	0.98	1	1	22	20	9	9	C
comp1055_c0	1086	C	A	1	60	0.9836	1	2	41	35	0.98	1	1	1	0	10	50	A
comp1057_c0	263	C	T	6	66	0.9167	1	2	37	36	0.98	1	1	6	0	36	30	T
comp105_c0	389	A	R	172	320	0.6504	2	2	38	37	0.98	1	1	171	1	132	188	G
comp105_c0	404	G	R	399	244	0.3795	2	2	38	36	0.98	1	1	396	3	103	141	A
comp1070_c0	165	A	R	4	5	0.5556	1	2	39	36	0.98	1	1	0	4	4	1	G
comp1070_c0	169	C	Y	4	5	0.5556	1	2	38	28	0.98	1	1	0	4	4	1	T
comp1073_c0	346	G	S	5	10	0.6667	2	2	36	35	0.98	1	1	2	3	4	6	C
comp1073_c0	355	G	S	5	10	0.6667	2	2	36	34	0.98	1	1	2	3	3	7	C
comp1073_c0	358	T	Y	5	10	0.6667	2	2	37	35	0.98	1	1	2	3	3	7	C
comp1073_c0	361	G	S	5	9	0.6429	2	2	35	36	0.98	1	1	2	3	3	6	C
comp1073_c0	366	A	M	13	20	0.6061	2	2	32	35	0.98	1	1	5	8	14	6	C
comp1073_c0	367	C	S	13	22	0.6286	2	2	36	36	0.98	1	1	5	8	14	8	G
comp1079_c0	906	C	Y	7	5	0.4167	2	2	38	37	0.98	1	1	1	6	1	4	T
comp1079_c0	907	T	W	7	5	0.4167	2	2	38	37	0.98	1	1	1	6	1	4	A
comp1079_c0	908	C	S	7	6	0.4615	2	2	38	36	0.98	1	1	1	6	2	4	G
comp1079_c0	909	A	M	7	6	0.4615	2	2	38	37	0.98	1	1	1	6	2	4	C
comp1082_c0	137	C	Y	22	13	0.3714	2	2	34	34	0.98	1	1	12	10	4	9	T
comp1082_c0	138	T	Y	20	17	0.4595	2	2	33	34	0.98	1	1	11	9	7	10	C
comp1082_c0	366	C	M	227	128	0.3606	2	2	36	38	0.98	1	1	109	118	76	52	A
comp1082_c0	392	G	K	232	145	0.3846	2	2	38	36	0.98	1	1	105	127	99	46	T
comp1082_c0	424	A	R	326	176	0.3506	2	2	38	38	0.98	1	1	207	119	131	45	G
comp1082_c0	429	C	Y	330	191	0.3666	2	2	38	35	0.98	1	1	210	120	138	53	T
comp1082_c0	435	T	W	325	194	0.3738	2	2	37	37	0.98	1	1	208	117	143	51	A
comp1082_c0	459	C	Y	321	213	0.3989	2	2	36	38	0.98	1	1	219	102	133	80	T
comp1082_c0	462	A	W	318	212	0.4	2	2	34	35	0.98	1	1	214	104	128	84	T
comp1082_c0	486	C	Y	359	206	0.3646	2	2	35	34	0.98	1	1	192	167	95	111	T
comp1082_c0	519	A	R	283	187	0.3979	2	2	37	36	0.98	1	1	81	202	57	130	G
comp1082_c0	564	A	R	253	198	0.439	2	2	37	38	0.98	1	1	84	169	63	135	G
comp1082_c0	597	T	K	232	147	0.3879	2	2	36	36	0.98	1	1	135	97	71	76	G
comp1082_c0	606	T	Y	245	172	0.4125	2	2	37	36	0.98	1	1	139	106	90	82	C
comp1082_c0	630	T	W	259	154	0.3729	2	2	37	36	0.98	1	1	185	74	95	59	A
comp1082_c0	651	A	R	257	166	0.3924	2	2	37	38	0.98	1	1	182	75	98	68	G
comp1082_c0	678	C	Y	290	166	0.364	2	2	36	36	0.98	1	1	179	111	101	65	T
comp1082_c0	702	C	Y	305	229	0.4288	2	2	36	36	0.98	1	1	127	178	111	118	T
comp1082_c0	747	T	Y	276	169	0.3798	2	2	37	37	0.98	1	1	88	188	77	92	C
comp1082_c0	750	G	S	270	164	0.3779	2	2	37	38	0.98	1	1	84	186	73	91	C
comp1082_c0	783	G	S	164	96	0.3692	2	2	36	35	0.98	1	1	50	114	47	49	C
comp1082_c0	813	G	R	107	69	0.392	2	2	37	37	0.98	1	1	33	74	19	50	A
comp1082_c0	825	A	R	86	62	0.4189	2	2	36	38	0.98	1	1	20	66	11	51	G
comp1082_c0	835	T	Y	62	53	0.4609	2	2	37	39	0.98	1	1	12	50	7	46	C
comp1082_c0	852	A	R	44	49	0.5269	2	2	38	39	0.98	1	1	1	43	7	42	G
comp1082_c0	855	G	R	43	49	0.5326	2	2	37	38	0.98	1	1	1	42	7	42	A
comp1085_c0	2436	T	K	34	22	0.3929	2	2	31	33	0.98	1	1	13	21	3	19	G
comp1087_c1	398	G	S	32	24	0.4286	2	2	34	35	0.98	1	1	8	24	22	2	C
comp1087_c1	424	C	Y	29	32	0.5246	2	2	34	31	0.98	1	1	6	23	26	6	T
comp1088_c0	147	G	S	230	139	0.3767	2	2	35	35	0.98	1	1	150	80	138	1	C
comp1088_c0	149	C	M	227	139	0.3798	2	2	35	35	0.98	1	1	149	78	138	1	A
comp1088_c0	188	C	M	149	122	0.4502	2	2	36	31	0.98	1	1	68	81	58	64	A
comp1088_c0	195	G	K	191	104	0.3525	2	2	36	33	0.98	1	1	69	122	45	59	T
comp1091_c0	199	C	M	37	84	0.6942	2	2	37	38	0.98	1	1	19	18	37	47	A
comp1091_c0	206	A	R	45	79	0.6371	2	2	37	37	0.98	1	1	23	22	36	43	G
comp1091_c0	671	A	R	55	24	0.3038	2	2	38	37	0.98	1	1	24	31	7	17	G
comp1091_c0	963	A	R	53	26	0.3291	2	2	38	37	0.98	1	1	23	30	13	13	G
comp1092_c0	331	T	Y	82	42	0.3387	2	2	36	35	0.98	1	1	34	48	32	10	C
comp1092_c0	335	G	S	87	46	0.3459	2	2	36	35	0.98	1	1	38	49	36	10	C
comp1092_c0	398	G	K	70	53	0.4309	2	2	36	33	0.98	1	1	40	30	34	19	T
comp1092_c0	399	G	S	72	54	0.4286	2	2	35	36	0.98	1	1	42	30	35	19	C
comp1092_c0	409	C	S	76	54	0.4154	2	2	35	35	0.98	1	1	47	29	33	21	G
comp1095_c0	556	A	R	37	24	0.3934	2	2	36	37	0.98	1	1	20	17	8	16	G
comp1097_c0	901	A	M	16	7	0.3043	2	2	34	33	0.98	1	1	11	5	3	4	C
comp1097_c0	901	A	R	16	27	0.6279	2	2	34	34	0.98	1	1	11	5	24	3	G
comp109_c2	960	C	S	40	38	0.4872	2	2	36	38	0.98	1	1	27	13	32	6	G
comp109_c2	1020	C	Y	43	92	0.6815	2	2	36	36	0.98	1	1	24	19	39	53	T
comp109_c2	1141	C	M	51	56	0.5234	2	2	37	37	0.98	1	1	26	25	24	32	A
comp109_c2	1764	A	R	24	12	0.3333	2	2	37	39	0.98	1	1	15	9	8	4	G
comp109_c2	1841	A	R	31	25	0.4464	2	2	38	38	0.98	1	1	17	14	11	14	G
comp109_c2	1935	T	W	33	25	0.431	2	2	37	38	0.98	1	1	21	12	14	11	A
comp109_c2	1963	C	M	26	16	0.381	2	2	37	38	0.98	1	1	12	14	5	11	A
comp109_c2	2050	T	Y	30	14	0.3182	2	2	39	38	0.98	1	1	14	16	4	10	C
comp109_c2	2264	G	S	60	29	0.3258	2	2	38	37	0.98	1	1	28	32	8	21	C
comp109_c2	2264	G	K	60	30	0.3333	2	2	38	37	0.98	1	1	28	32	14	16	T
comp109_c2	2492	A	W	54	31	0.3647	2	2	38	37	0.98	1	1	26	28	18	13	T
comp109_c2	2523	C	Y	52	26	0.3333	2	2	38	37	0.98	1	1	28	24	15	11	T
comp109_c2	2606	A	W	51	34	0.4	2	2	38	37	0.98	1	1	23	28	9	25	T
comp109_c2	2710	T	Y	35	29	0.4531	2	2	38	38	0.98	1	1	19	16	20	9	C
comp109_c2	2780	A	R	33	30	0.4762	2	2	37	37	0.98	1	1	13	20	13	17	G
comp109_c2	2929	G	S	28	45	0.6164	2	2	37	37	0.98	1	1	18	10	25	20	C
comp109_c2	2951	C	T	19	73	0.7935	2	2	36	36	0.98	1	1	15	4	42	31	T
comp109_c2	3002	G	K	56	38	0.4043	2	2	36	38	0.98	1	1	24	32	21	17	T
comp109_c2	3228	A	M	73	53	0.4206	2	2	36	35	0.98	1	1	28	45	27	26	C
comp109_c2	3253	T	Y	68	43	0.3874	2	2	36	36	0.98	1	1	31	37	26	17	C
comp109_c2	3440	T	Y	67	57	0.4597	2	2	36	37	0.98	1	1	33	34	28	29	C
comp109_c2	3444	T	Y	69	55	0.4435	2	2	36	37	0.98	1	1	37	32	25	30	C
comp109_c2	3523	T	Y	89	82	0.4795	2	2	36	37	0.98	1	1	47	42	40	42	C
comp109_c2	3543	T	K	109	68	0.3842	2	2	37	37	0.98	1	1	62	47	28	40	G
comp109_c2	3572	A	R	126	62	0.3298	2	2	37	38	0.98	1	1	69	57	32	30	G
comp109_c2	3710	T	Y	89	43	0.3258	2	2	38	37	0.98	1	1	44	45	16	27	C
comp109_c2	3801	C	G	9	63	0.875	2	2	34	38	0.98	1	1	4	5	24	39	G
comp109_c2	3839	C	Y	31	16	0.3404	2	2	37	35	0.98	1	1	1	30	2	14	T
comp10_c0	35	G	R	103	126	0.5502	2	2	34	34	0.98	1	1	102	1	115	11	A
comp10_c0	65	G	K	2322	1336	0.3652	2	2	38	37	0.98	1	1	2281	41	1288	48	T
comp10_c0	178	G	S	3013	1834	0.3784	2	2	36	35	0.98	1	1	445	2568	224	1610	C
comp10_c0	179	C	Y	2949	1829	0.3828	2	2	36	35	0.98	1	1	378	2571	216	1613	T
comp10_c0	236	A	R	1838	961	0.3433	2	2	36	36	0.98	1	1	37	1801	199	762	G
comp10_c0	278	C	S	398	240	0.3762	2	2	38	34	0.98	1	1	24	374	151	89	G
comp10_c0	279	G	R	352	284	0.4465	2	2	38	34	0.98	1	1	17	335	158	126	A
comp10_c0	281	C	M	392	239	0.3788	2	2	38	32	0.98	1	1	24	368	153	86	A
comp10_c0	494	G	K	439	241	0.3544	2	2	34	35	0.98	1	1	228	211	119	122	T
comp10_c0	543	A	R	270	136	0.335	2	2	37	37	0.98	1	1	92	178	31	105	G
comp10_c0	665	T	Y	163	122	0.4281	2	2	37	37	0.98	1	1	53	110	40	82	C
comp1104_c0	223	A	G	2	145	0.9864	1	2	39	35	0.98	1	1	2	0	77	68	G
comp1104_c0	232	C	G	2	122	0.9839	1	2	39	35	0.98	1	1	2	0	59	63	G
comp1104_c0	241	A	G	4	111	0.9652	1	2	38	35	0.98	1	1	4	0	42	69	G
comp1104_c0	250	G	A	6	88	0.9362	1	2	38	27	0.98	1	1	6	0	18	70	A
comp1104_c0	253	T	G	7	84	0.9231	1	2	37	35	0.98	1	1	7	0	8	76	G
comp1107_c0	23	C	T	0	27	1	0	2	0	37	0.98	0	1	0	0	12	15	T
comp1107_c0	24	A	C	0	27	1	0	2	0	37	0.98	0	1	0	0	12	15	C
comp1107_c0	28	G	A	0	28	1	0	2	0	36	0.98	0	1	0	0	13	15	A
comp1109_c0	57	T	G	12	92	0.8846	1	2	38	37	0.98	1	1	0	12	47	45	G
comp1109_c0	69	A	G	12	96	0.8889	1	2	34	37	0.98	1	1	0	12	49	47	G
comp110_c0	521	C	Y	820	363	0.3068	2	2	37	37	0.98	1	1	345	475	271	92	T
comp110_c0	536	C	Y	786	424	0.3504	2	2	36	36	0.98	1	1	370	416	242	182	T
comp110_c0	542	C	Y	732	435	0.3728	2	2	37	37	0.98	1	1	332	400	244	191	T
comp110_c0	545	C	Y	798	463	0.3672	2	2	37	36	0.98	1	1	382	416	258	205	T
comp110_c0	584	T	Y	672	855	0.5599	2	2	37	36	0.98	1	1	311	361	514	341	C
comp110_c0	617	A	R	861	676	0.4398	2	2	36	36	0.98	1	1	494	367	323	353	G
comp110_c0	632	A	R	910	677	0.4266	2	2	36	37	0.98	1	1	500	410	351	326	G
comp110_c0	689	G	R	903	537	0.3729	2	2	37	37	0.98	1	1	427	476	225	312	A
comp110_c0	692	A	R	938	545	0.3675	2	2	37	38	0.98	1	1	460	478	232	313	G
comp110_c0	704	G	R	1054	578	0.3542	2	2	37	37	0.98	1	1	561	493	308	270	A
comp110_c0	722	T	Y	977	563	0.3656	2	2	35	37	0.98	1	1	484	493	267	296	C
comp110_c0	740	C	Y	953	545	0.3638	2	2	36	37	0.98	1	1	494	459	265	280	T
comp110_c0	752	C	Y	953	639	0.4014	2	2	37	37	0.98	1	1	506	447	338	301	T
comp110_c0	788	T	Y	1037	675	0.3943	2	2	37	38	0.98	1	1	511	526	366	309	C
comp110_c0	794	C	Y	1007	675	0.4013	2	2	37	38	0.98	1	1	494	513	374	301	T
comp110_c0	800	T	Y	961	652	0.4042	2	2	37	38	0.98	1	1	475	486	377	275	C
comp110_c0	818	G	R	768	632	0.4514	2	2	37	38	0.98	1	1	366	402	403	229	A
comp111_c0	177	C	T	5	47	0.9038	2	2	35	37	0.98	1	1	3	2	46	1	T
comp111_c0	186	C	T	2	110	0.9821	1	2	31	37	0.98	1	1	0	2	109	1	T
comp111_c0	189	A	C	4	301	0.9869	2	2	28	35	0.98	1	1	1	3	300	1	C
comp111_c0	204	C	G	4	516	0.9923	2	2	36	38	0.98	1	1	1	3	514	2	G
comp1120_c0	803	G	C	13	104	0.8889	2	2	36	37	0.98	1	1	3	10	4	100	C
comp1120_c0	805	T	G	13	102	0.887	2	2	35	36	0.98	1	1	3	10	3	99	G
comp1120_c0	820	G	C	14	71	0.8353	2	2	34	38	0.98	1	1	3	11	3	68	C
comp1120_c0	821	G	A	14	71	0.8353	2	2	32	38	0.98	1	1	3	11	3	68	A
comp1120_c0	824	C	G	11	71	0.8659	2	2	33	38	0.98	1	1	2	9	3	68	G
comp1123_c0	112	A	W	41	46	0.5287	2	2	38	38	0.98	1	1	39	2	36	10	T
comp1123_c0	163	T	K	54	46	0.46	2	2	38	39	0.98	1	1	22	32	24	22	G
comp1123_c0	256	C	Y	183	124	0.4039	2	2	39	38	0.98	1	1	147	36	81	43	T
comp1123_c0	275	A	R	210	127	0.3769	2	2	38	38	0.98	1	1	151	59	88	39	G
comp1123_c0	398	C	Y	243	142	0.3688	2	2	37	37	0.98	1	1	117	126	86	56	T
comp1123_c0	450	A	R	193	129	0.4006	2	2	37	37	0.98	1	1	92	101	63	66	G
comp1123_c0	501	C	Y	214	113	0.3456	2	2	37	37	0.98	1	1	113	101	42	71	T
comp1123_c0	536	G	K	215	103	0.3239	2	2	36	37	0.98	1	1	121	94	52	51	T
comp1123_c0	598	T	Y	200	93	0.3174	2	2	37	37	0.98	1	1	85	115	50	43	C
comp1123_c0	871	T	Y	104	134	0.563	2	2	38	38	0.98	1	1	65	39	79	55	C
comp1123_c0	875	C	M	124	128	0.5079	2	2	37	37	0.98	1	1	77	47	77	51	A
comp1123_c0	890	A	W	150	139	0.481	2	2	38	37	0.98	1	1	88	62	93	46	T
comp1123_c0	918	T	Y	190	131	0.4081	2	2	37	36	0.98	1	1	103	87	69	62	C
comp1123_c0	1127	C	Y	153	120	0.4396	2	2	37	38	0.98	1	1	91	62	79	41	T
comp1123_c0	1201	G	K	265	252	0.4874	2	2	38	38	0.98	1	1	196	69	183	69	T
comp1123_c0	1259	A	M	234	237	0.5032	2	2	38	37	0.98	1	1	120	114	120	117	C
comp1123_c0	1310	T	Y	190	181	0.4879	2	2	38	38	0.98	1	1	8	182	11	170	C
comp1127_c0	122	G	R	16	7	0.3043	2	2	37	38	0.98	1	1	10	6	6	1	A
comp1127_c0	246	T	Y	127	73	0.365	2	2	37	36	0.98	1	1	68	59	42	31	C
comp1128_c0	1392	G	K	209	122	0.3686	2	2	38	37	0.98	1	1	96	113	77	45	T
comp1128_c0	1404	A	R	187	119	0.3889	2	2	37	37	0.98	1	1	79	108	69	50	G
comp1128_c0	1452	A	R	149	114	0.4335	2	2	37	36	0.98	1	1	65	84	10	104	G
comp1128_c0	1455	T	W	147	104	0.4143	2	2	38	34	0.98	1	1	64	83	4	100	A
comp1128_c0	1458	A	R	155	101	0.3945	2	2	37	37	0.98	1	1	69	86	4	97	G
comp1128_c0	1461	G	R	161	100	0.3831	2	2	36	35	0.98	1	1	73	88	2	98	A
comp1128_c0	1464	T	Y	174	95	0.3532	2	2	36	37	0.98	1	1	76	98	2	93	C
comp1137_c1	642	G	R	23	34	0.5965	2	2	36	32	0.98	1	1	16	7	4	30	A
comp1137_c1	647	A	R	25	28	0.5283	2	2	37	36	0.98	1	1	18	7	2	26	G
comp1137_c1	649	A	R	25	28	0.5283	2	2	38	36	0.98	1	1	18	7	2	26	G
comp1137_c1	651	A	R	26	28	0.5185	2	2	37	35	0.98	1	1	18	8	2	26	G
comp1137_c1	653	A	R	30	28	0.4828	2	2	36	36	0.98	1	1	20	10	2	26	G
comp1139_c0	1159	C	T	0	238	1	0	2	0	37	0.98	0	1	0	0	118	120	T
comp1143_c1	24	A	T	0	42	1	0	2	0	37	0.98	0	1	0	0	1	41	T
comp1147_c0	513	T	Y	252	117	0.3171	2	2	36	37	0.98	1	1	150	102	69	48	C
comp1147_c0	696	A	R	216	93	0.301	2	2	37	36	0.98	1	1	131	85	52	41	G
comp1147_c0	700	T	K	207	89	0.3007	2	2	37	37	0.98	1	1	121	86	51	38	G
comp1147_c0	720	A	R	228	102	0.3091	2	2	36	38	0.98	1	1	129	99	61	41	G
comp1147_c0	755	A	R	283	133	0.3197	2	2	37	36	0.98	1	1	177	106	82	51	G
comp1147_c0	833	C	Y	323	168	0.3422	2	2	37	37	0.98	1	1	146	177	73	95	T
comp1147_c0	900	A	M	305	152	0.3326	2	2	38	38	0.98	1	1	134	171	70	82	C
comp1147_c0	963	A	R	306	164	0.3489	2	2	37	37	0.98	1	1	158	148	92	72	G
comp1147_c0	1002	A	R	289	182	0.3864	2	2	38	37	0.98	1	1	159	130	109	73	G
comp1147_c0	1083	A	R	266	159	0.3741	2	2	37	38	0.98	1	1	121	145	63	96	G
comp1147_c0	1098	G	R	269	152	0.361	2	2	37	37	0.98	1	1	110	159	51	101	A
comp1147_c0	1113	C	Y	240	129	0.3496	2	2	38	37	0.98	1	1	94	146	41	88	T
comp1147_c0	1128	C	Y	243	131	0.3503	2	2	38	37	0.98	1	1	96	147	44	87	T
comp1147_c0	1139	C	Y	213	118	0.3565	2	2	38	37	0.98	1	1	82	131	37	81	T
comp1147_c0	1208	G	R	174	87	0.3333	2	2	37	38	0.98	1	1	90	84	46	41	A
comp1147_c0	1262	T	W	212	94	0.3072	2	2	37	36	0.98	1	1	117	95	53	41	A
comp1147_c0	1410	T	Y	263	120	0.3133	2	2	37	38	0.98	1	1	135	128	68	52	C
comp1147_c0	1470	G	K	284	167	0.3703	2	2	37	37	0.98	1	1	157	127	102	65	T
comp1147_c0	1587	C	M	210	161	0.434	2	2	37	36	0.98	1	1	96	114	60	101	A
comp1159_c0	258	C	Y	141	73	0.3411	2	2	35	34	0.98	1	1	60	81	31	42	T
comp116_c0	803	A	R	67	164	0.71	2	2	39	37	0.98	1	1	66	1	90	74	G
comp116_c0	809	A	W	74	125	0.6281	2	2	38	36	0.98	1	1	73	1	71	54	T
comp116_c0	824	G	R	113	71	0.3859	2	2	39	37	0.98	1	1	112	1	39	32	A
comp116_c0	830	T	Y	129	64	0.3316	2	2	35	37	0.98	1	1	128	1	32	32	C
comp1170_c0	13	A	G	0	10	1	0	2	0	33	0.98	0	1	0	0	1	9	G
comp1170_c0	1030	G	K	35	21	0.375	2	2	36	36	0.98	1	1	21	14	12	9	T
comp1170_c0	1051	T	Y	37	17	0.3148	2	2	38	38	0.98	1	1	22	15	8	9	C
comp1178_c0	160	G	K	35	17	0.3269	2	2	35	33	0.98	1	1	23	12	4	13	T
comp1178_c0	197	A	R	37	27	0.4219	2	2	35	35	0.98	1	1	9	28	9	18	G
comp1178_c0	217	T	Y	44	26	0.3714	2	2	34	36	0.98	1	1	14	30	9	17	C
comp1178_c0	232	G	S	51	28	0.3544	2	2	37	37	0.98	1	1	12	39	11	17	C
comp1178_c0	242	G	R	50	29	0.3671	2	2	37	37	0.98	1	1	12	38	12	17	A
comp1178_c0	361	A	W	49	22	0.3099	2	2	37	35	0.98	1	1	32	17	14	8	T
comp1178_c0	377	A	W	68	32	0.32	2	2	35	35	0.98	1	1	44	24	19	13	T
comp1178_c0	412	C	Y	75	72	0.4898	2	2	37	36	0.98	1	1	47	28	41	31	T
comp1178_c0	442	C	Y	90	65	0.4194	2	2	37	39	0.98	1	1	48	42	31	34	T
comp1178_c0	451	C	M	92	64	0.4103	2	2	37	37	0.98	1	1	50	42	30	34	A
comp1178_c0	493	A	R	94	41	0.3037	2	2	37	36	0.98	1	1	51	43	27	14	G
comp1178_c0	619	A	R	109	53	0.3272	2	2	37	37	0.98	1	1	40	69	23	30	G
comp1178_c0	760	G	R	67	105	0.6105	2	2	37	37	0.98	1	1	29	38	49	56	A
comp1178_c0	838	C	Y	128	93	0.4208	2	2	36	36	0.98	1	1	71	57	53	40	T
comp1178_c0	881	C	Y	88	65	0.4248	2	2	37	37	0.98	1	1	40	48	32	33	T
comp1178_c0	890	A	R	96	57	0.3725	2	2	37	38	0.98	1	1	38	58	27	30	G
comp1178_c0	945	A	W	73	37	0.3364	2	2	35	35	0.98	1	1	19	54	20	17	T
comp1178_c0	947	A	R	72	38	0.3455	2	2	36	37	0.98	1	1	19	53	20	18	G
comp1178_c0	948	T	K	72	38	0.3455	2	2	36	37	0.98	1	1	19	53	20	18	G
comp1178_c0	985	A	W	55	85	0.6071	2	2	37	36	0.98	1	1	10	45	57	28	T
comp1181_c0	1116	C	Y	151	67	0.3073	2	2	36	38	0.98	1	1	89	62	64	3	T
comp1181_c0	1120	C	M	154	68	0.3063	2	2	36	38	0.98	1	1	83	71	65	3	A
comp1181_c0	1123	G	S	156	68	0.3036	2	2	35	38	0.98	1	1	83	73	65	3	C
comp1181_c0	1168	C	S	119	84	0.4138	2	2	34	34	0.98	1	1	46	73	55	29	G
comp1181_c0	1177	G	S	103	60	0.3681	2	2	35	34	0.98	1	1	33	70	26	34	C
comp1181_c0	1180	G	S	99	57	0.3654	2	2	36	32	0.98	1	1	28	71	22	35	C
comp1181_c0	1184	A	W	94	56	0.3733	2	2	35	30	0.98	1	1	19	75	20	36	T
comp1181_c0	1201	G	R	86	71	0.4522	2	2	37	34	0.98	1	1	12	74	18	53	A
comp1181_c0	1236	C	M	84	55	0.3957	2	2	37	35	0.98	1	1	6	78	4	51	A
comp1189_c0	292	T	Y	26	56	0.6829	1	2	39	39	0.98	1	1	26	0	24	32	C
comp1189_c0	325	A	W	33	31	0.4844	2	2	37	37	0.98	1	1	28	5	20	11	T
comp1189_c0	328	T	W	33	29	0.4677	2	2	35	37	0.98	1	1	28	5	18	11	A
comp1189_c0	470	G	K	13	10	0.4348	2	2	34	34	0.98	1	1	9	4	1	9	T
comp118_c1	1178	G	S	93	41	0.306	2	2	36	36	0.98	1	1	45	48	25	16	C
comp118_c1	1211	A	R	89	56	0.3862	2	2	36	36	0.98	1	1	55	34	43	13	G
comp118_c1	1214	G	S	89	53	0.3732	2	2	36	37	0.98	1	1	55	34	40	13	C
comp118_c1	1216	T	Y	90	53	0.3706	2	2	36	38	0.98	1	1	56	34	40	13	C
comp118_c1	1217	G	S	90	53	0.3706	2	2	36	38	0.98	1	1	56	34	40	13	C
comp118_c1	1244	G	R	74	64	0.4638	2	2	35	33	0.98	1	1	44	30	40	24	A
comp118_c1	1247	G	S	70	66	0.4853	2	2	35	37	0.98	1	1	33	37	39	27	C
comp118_c1	1252	G	K	61	71	0.5379	2	2	35	35	0.98	1	1	29	32	40	31	T
comp118_c1	1256	G	R	63	71	0.5299	2	2	35	36	0.98	1	1	28	35	40	31	A
comp118_c1	1288	T	K	73	56	0.4341	2	2	34	35	0.98	1	1	26	47	13	43	G
comp118_c1	1298	T	K	74	47	0.3884	2	2	36	37	0.98	1	1	26	48	6	41	G
comp118_c1	1301	C	S	75	44	0.3697	2	2	35	36	0.98	1	1	26	49	6	38	G
comp118_c1	1303	T	K	75	44	0.3697	2	2	35	37	0.98	1	1	26	49	6	38	G
comp118_c1	1309	C	M	77	41	0.3475	2	2	35	34	0.98	1	1	28	49	1	40	A
comp1190_c0	3980	C	Y	14	7	0.3333	2	2	35	37	0.98	1	1	6	8	3	4	T
comp1190_c0	4157	A	W	23	23	0.5	2	2	37	36	0.98	1	1	10	13	12	11	T
comp1190_c0	4859	G	R	41	25	0.3788	2	2	35	37	0.98	1	1	9	32	10	15	A
comp1190_c0	4985	A	R	18	13	0.4194	2	2	38	36	0.98	1	1	9	9	8	5	G
comp1190_c0	5024	C	M	15	9	0.375	2	2	37	37	0.98	1	1	8	7	5	4	A
comp1190_c0	5087	A	R	16	7	0.3043	2	2	38	37	0.98	1	1	10	6	1	6	G
comp1190_c0	5530	A	W	23	10	0.303	2	2	37	37	0.98	1	1	11	12	2	8	T
comp1190_c0	6344	C	Y	6	6	0.5	2	2	36	35	0.98	1	1	1	5	4	2	T
comp1197_c0	486	C	T	4	45	0.9184	2	2	33	36	0.98	1	1	1	3	11	34	T
comp119_c0	538	A	R	25	12	0.3243	2	2	34	35	0.98	1	1	16	9	7	5	G
comp11_c0	717	T	Y	186	90	0.3261	2	2	36	36	0.98	1	1	36	150	1	89	C
comp11_c0	719	C	Y	153	117	0.4333	2	2	37	36	0.98	1	1	15	138	17	100	T
comp1202_c0	3594	G	R	19	22	0.5366	2	2	37	38	0.98	1	1	8	11	2	20	A
comp1202_c0	3596	A	R	11	19	0.6333	2	2	35	37	0.98	1	1	7	4	2	17	G
comp1202_c0	3596	A	W	11	10	0.4762	2	2	35	33	0.98	1	1	7	4	1	9	G
comp1202_c0	3599	C	A	5	31	0.8611	1	2	38	38	0.98	1	1	5	0	2	29	A
comp1205_c0	655	T	W	56	57	0.5044	2	2	35	34	0.98	1	1	14	42	47	10	A
comp1213_c0	211	C	Y	69	68	0.4964	2	2	37	37	0.98	1	1	33	36	25	43	T
comp1213_c0	3014	C	Y	58	27	0.3176	2	2	39	37	0.98	1	1	33	25	16	11	T
comp1215_c0	368	G	R	199	272	0.5775	2	2	34	34	0.98	1	1	27	172	150	122	A
comp1215_c0	370	G	S	205	263	0.562	2	2	34	36	0.98	1	1	29	176	145	118	C
comp1215_c0	374	A	R	217	218	0.5011	2	2	33	34	0.98	1	1	34	183	118	100	G
comp1215_c0	391	A	R	252	147	0.3684	2	2	33	36	0.98	1	1	43	209	49	98	G
comp121_c0	1865	T	Y	7	9	0.5625	1	2	34	37	0.98	1	1	0	7	5	4	C
comp121_c0	1868	C	G	3	9	0.75	1	2	35	38	0.98	1	1	0	3	5	4	G
comp121_c0	1869	A	G	2	9	0.8182	1	2	35	37	0.98	1	1	0	2	5	4	G
comp1224_c0	624	A	G	1	9	0.9	1	2	37	34	0.98	1	1	0	1	3	6	G
comp1230_c0	1015	T	C	12	78	0.8667	1	2	36	37	0.98	1	1	12	0	15	63	C
comp1230_c0	1018	A	G	12	75	0.8621	1	2	39	36	0.98	1	1	12	0	15	60	G
comp1230_c0	1021	T	C	11	51	0.8226	1	2	38	38	0.98	1	1	11	0	4	47	C
comp1230_c0	1023	G	T	15	50	0.7692	1	2	37	38	0.98	1	1	15	0	3	47	T
comp1230_c0	1024	C	T	16	50	0.7576	1	2	36	38	0.98	1	1	16	0	3	47	T
comp1237_c0	413	A	R	62	36	0.3673	2	2	39	37	0.98	1	1	22	40	19	17	G
comp1237_c0	476	C	Y	89	66	0.4258	2	2	36	37	0.98	1	1	61	28	38	28	T
comp1237_c0	477	C	Y	92	67	0.4214	2	2	37	37	0.98	1	1	67	25	39	28	T
comp1237_c0	903	G	K	311	178	0.364	2	2	38	37	0.98	1	1	149	162	94	84	T
comp1237_c0	1023	G	R	279	197	0.4139	2	2	37	37	0.98	1	1	122	157	77	120	A
comp1237_c0	1065	G	S	269	169	0.3858	2	2	38	38	0.98	1	1	140	129	67	102	C
comp1237_c0	1081	T	K	261	132	0.3359	2	2	38	38	0.98	1	1	134	127	65	67	G
comp1237_c0	1264	T	K	141	76	0.3502	2	2	36	37	0.98	1	1	34	107	25	51	G
comp1237_c0	1306	G	R	60	81	0.5745	2	2	36	35	0.98	1	1	33	27	2	79	A
comp1237_c0	1309	C	Y	55	81	0.5956	2	2	33	34	0.98	1	1	28	27	2	79	T
comp1240_c0	943	A	R	21	35	0.625	1	2	36	33	0.98	1	1	21	0	10	25	G
comp1240_c0	953	T	K	22	33	0.6	1	2	31	35	0.98	1	1	22	0	9	24	G
comp1240_c0	954	G	K	24	31	0.5636	2	2	36	33	0.98	1	1	23	1	7	24	T
comp1240_c0	967	C	S	32	31	0.4921	2	2	39	35	0.98	1	1	31	1	6	25	G
comp1245_c0	792	C	M	55	29	0.3452	1	2	38	37	0.98	1	1	0	55	18	11	A
comp1245_c0	795	C	Y	51	30	0.3704	1	2	36	36	0.98	1	1	0	51	18	12	T
comp1245_c0	798	T	Y	49	30	0.3797	1	2	34	37	0.98	1	1	0	49	18	12	C
comp1245_c0	800	G	K	48	32	0.4	1	2	35	37	0.98	1	1	0	48	20	12	T
comp1245_c0	810	G	K	19	50	0.7246	1	2	40	36	0.98	1	1	0	19	31	19	T
comp1248_c1	1392	C	Y	69	35	0.3365	2	2	38	38	0.98	1	1	4	65	33	2	T
comp1248_c1	1404	C	Y	60	38	0.3878	2	2	39	38	0.98	1	1	1	59	31	7	T
comp1248_c1	1410	G	R	59	38	0.3918	2	2	39	37	0.98	1	1	1	58	31	7	A
comp1248_c1	1416	T	Y	53	39	0.4239	2	2	39	38	0.98	1	1	1	52	32	7	C
comp1248_c1	1434	G	R	29	37	0.5606	2	2	39	35	0.98	1	1	1	28	27	10	A
comp1255_c0	149	A	M	47	42	0.4719	2	2	34	34	0.98	1	1	36	11	40	2	C
comp1255_c0	298	A	W	149	95	0.3893	2	2	34	33	0.98	1	1	77	72	43	52	T
comp1255_c0	599	C	Y	27	20	0.4255	2	2	38	40	0.98	1	1	15	12	7	13	T
comp1255_c0	845	T	Y	141	69	0.3286	2	2	36	37	0.98	1	1	70	71	50	19	C
comp1255_c0	1165	A	R	14	9	0.3913	2	2	34	33	0.98	1	1	6	8	1	8	G
comp1260_c0	894	C	G	1	105	0.9906	1	2	38	35	0.98	1	1	0	1	77	28	G
comp1263_c0	713	G	R	219	95	0.3025	2	2	38	37	0.98	1	1	91	128	57	38	A
comp1263_c0	721	T	K	195	95	0.3276	2	2	36	37	0.98	1	1	83	112	56	39	G
comp1263_c0	728	A	M	184	119	0.3927	2	2	38	37	0.98	1	1	86	98	64	55	C
comp1263_c0	733	C	Y	187	124	0.3987	2	2	38	37	0.98	1	1	88	99	69	55	T
comp1263_c0	775	T	K	144	141	0.4947	2	2	37	37	0.98	1	1	68	76	72	69	G
comp1263_c0	781	A	R	150	141	0.4845	2	2	37	37	0.98	1	1	71	79	72	69	G
comp1263_c0	799	A	R	133	123	0.4805	2	2	37	37	0.98	1	1	69	64	44	79	G
comp1263_c0	814	G	S	157	125	0.4433	2	2	37	37	0.98	1	1	67	90	46	79	C
comp1278_c0	602	A	T	17	108	0.864	1	2	40	37	0.98	1	1	17	0	49	59	T
comp1278_c0	611	T	A	20	90	0.8182	2	2	39	36	0.98	1	1	18	2	36	54	A
comp1278_c0	617	C	T	22	94	0.8103	2	2	39	37	0.98	1	1	20	2	36	58	T
comp1278_c0	635	C	Y	29	67	0.6979	2	2	38	35	0.98	1	1	27	2	23	44	T
comp1278_c0	650	T	Y	35	54	0.6067	2	2	33	35	0.98	1	1	31	4	12	42	C
comp1278_c0	704	G	R	62	40	0.3922	2	2	36	39	0.98	1	1	29	33	1	39	A
comp127_c1	644	T	C	58	312	0.8432	1	2	39	37	0.98	1	1	58	0	125	187	C
comp127_c1	646	T	G	61	294	0.8282	1	2	38	37	0.98	1	1	61	0	115	179	G
comp127_c1	647	A	G	61	277	0.8195	1	2	38	37	0.98	1	1	61	0	111	166	G
comp127_c1	650	G	A	82	332	0.8019	2	2	37	37	0.98	1	1	81	1	103	229	A
comp127_c1	656	A	G	93	303	0.7652	2	2	38	37	0.98	1	1	89	4	78	225	G
comp127_c1	701	A	R	210	202	0.4903	2	2	38	38	0.98	1	1	190	20	1	201	G
comp1289_c0	2077	C	Y	14	11	0.44	1	2	37	36	0.98	1	1	0	14	1	10	T
comp1292_c0	1732	C	Y	75	84	0.5283	2	2	37	36	0.98	1	1	46	29	37	47	T
comp1292_c0	2060	T	Y	34	44	0.5641	2	2	35	33	0.98	1	1	13	21	15	29	C
comp1292_c0	2092	G	S	39	31	0.4429	2	2	36	36	0.98	1	1	10	29	16	15	C
comp1292_c0	2161	T	Y	46	43	0.4831	2	2	37	37	0.98	1	1	29	17	34	9	C
comp1294_c0	2001	C	S	38	23	0.377	2	2	34	36	0.98	1	1	21	17	20	3	G
comp1294_c0	2009	T	K	33	39	0.5417	2	2	35	37	0.98	1	1	18	15	33	6	G
comp1305_c0	117	T	Y	6	5	0.4545	1	2	34	38	0.98	1	1	6	0	3	2	C
comp1305_c0	144	C	S	8	5	0.3846	2	2	38	33	0.98	1	1	6	2	3	2	G
comp1306_c1	54	C	A	0	18	1	0	2	0	35	0.98	0	1	0	0	10	8	A
comp1313_c0	1432	T	Y	65	71	0.5221	2	2	34	38	0.98	1	1	34	31	65	6	C
comp1313_c0	1440	A	R	63	70	0.5263	2	2	36	38	0.98	1	1	32	31	60	10	G
comp1313_c0	1459	C	M	57	97	0.6299	2	2	37	37	0.98	1	1	29	28	78	19	A
comp1316_c0	90	G	K	10	13	0.5652	2	2	32	35	0.98	1	1	9	1	10	3	T
comp132_c0	722	G	S	19	20	0.5128	2	2	36	38	0.98	1	1	11	8	15	5	C
comp132_c0	726	T	Y	12	20	0.625	2	2	33	35	0.98	1	1	7	5	15	5	C
comp1336_c0	1455	T	W	23	68	0.7473	1	2	38	37	0.98	1	1	23	0	24	44	A
comp1336_c0	1470	A	R	37	54	0.5934	1	2	38	39	0.98	1	1	37	0	7	47	G
comp1336_c0	1471	A	R	37	52	0.5843	1	2	39	39	0.98	1	1	37	0	5	47	G
comp1336_c0	1479	A	R	41	56	0.5773	2	2	38	39	0.98	1	1	37	4	2	54	G
comp1336_c0	1500	C	Y	84	41	0.328	2	2	36	38	0.98	1	1	80	4	1	40	T
comp1341_c0	397	C	Y	9	4	0.3077	1	2	38	36	0.98	1	1	0	9	3	1	T
comp1341_c0	398	C	Y	9	4	0.3077	1	2	38	39	0.98	1	1	0	9	3	1	T
comp1341_c0	796	A	W	85	51	0.375	2	2	38	38	0.98	1	1	52	33	41	10	T
comp1341_c0	817	T	Y	78	49	0.3858	2	2	37	36	0.98	1	1	32	46	40	9	C
comp1341_c0	873	A	M	59	28	0.3218	2	2	37	36	0.98	1	1	6	53	12	16	C
comp1341_c0	874	A	R	59	28	0.3218	2	2	37	37	0.98	1	1	6	53	12	16	G
comp1341_c0	879	C	Y	58	32	0.3556	2	2	37	36	0.98	1	1	6	52	12	20	T
comp1341_c0	895	G	R	44	34	0.4359	2	2	39	36	0.98	1	1	3	41	12	22	A
comp1344_c0	84	A	M	46	60	0.566	2	2	34	37	0.98	1	1	36	10	55	5	C
comp1344_c0	87	A	M	45	68	0.6018	2	2	33	37	0.98	1	1	34	11	62	6	C
comp1344_c0	92	C	Y	44	77	0.6364	2	2	33	33	0.98	1	1	34	10	63	14	T
comp1344_c1	723	A	R	12	9	0.4286	2	2	37	37	0.98	1	1	4	8	5	4	G
comp1345_c0	1617	T	C	0	12	1	0	2	0	35	0.98	0	1	0	0	3	9	C
comp1349_c0	459	G	R	35	18	0.3396	2	2	35	36	0.98	1	1	19	16	6	12	A
comp1349_c0	465	T	Y	28	18	0.3913	2	2	35	37	0.98	1	1	17	11	6	12	C
comp134_c0	347	C	G	151	557	0.7867	2	2	37	36	0.98	1	1	147	4	319	238	G
comp134_c0	351	T	C	153	539	0.7789	2	2	37	34	0.98	1	1	149	4	316	223	C
comp134_c0	382	A	M	251	448	0.6409	2	2	37	35	0.98	1	1	229	22	161	287	C
comp134_c0	385	C	M	284	415	0.5937	2	2	37	35	0.98	1	1	259	25	130	285	A
comp134_c0	397	A	R	345	394	0.5332	2	2	35	36	0.98	1	1	294	51	89	305	G
comp134_c0	428	G	R	543	326	0.3751	2	2	34	37	0.98	1	1	412	131	1	325	A
comp1353_c0	1319	G	S	27	28	0.5091	2	2	37	38	0.98	1	1	2	25	27	1	C
comp1353_c0	1320	A	W	25	29	0.537	2	2	37	37	0.98	1	1	2	23	27	2	T
comp1353_c0	1324	C	Y	25	35	0.5833	2	2	38	37	0.98	1	1	2	23	33	2	T
comp1353_c0	1330	C	M	21	44	0.6769	2	2	37	34	0.98	1	1	2	19	42	2	A
comp1353_c0	1342	T	G	19	58	0.7532	2	2	37	36	0.98	1	1	2	17	54	4	G
comp1355_c0	720	C	S	20	11	0.3548	2	2	37	39	0.98	1	1	15	5	9	2	G
comp1355_c0	1494	T	K	56	51	0.4766	2	2	35	36	0.98	1	1	12	44	10	41	G
comp1356_c0	811	T	K	105	102	0.4928	2	2	34	38	0.98	1	1	12	93	99	3	G
comp1367_c0	272	A	W	66	37	0.3592	2	2	35	36	0.98	1	1	37	29	33	4	T
comp1367_c0	274	C	S	66	35	0.3465	2	2	36	38	0.98	1	1	38	28	33	2	G
comp1367_c0	311	A	R	117	87	0.4265	2	2	37	38	0.98	1	1	82	35	71	16	G
comp1367_c0	332	A	R	133	107	0.4458	2	2	37	37	0.98	1	1	97	36	83	24	G
comp1367_c0	341	T	Y	156	108	0.4091	2	2	37	37	0.98	1	1	121	35	81	27	C
comp1367_c0	365	C	Y	191	132	0.4087	2	2	36	36	0.98	1	1	145	46	86	46	T
comp1367_c0	371	C	Y	200	140	0.4118	2	2	37	36	0.98	1	1	147	53	86	54	T
comp1367_c0	476	G	K	149	145	0.4932	2	2	35	36	0.98	1	1	72	77	43	102	T
comp1367_c0	491	T	K	169	139	0.4513	2	2	36	38	0.98	1	1	86	83	28	111	G
comp1367_c0	495	C	M	167	133	0.4433	2	2	36	38	0.98	1	1	84	83	27	106	A
comp1367_c0	496	G	R	166	133	0.4448	2	2	36	37	0.98	1	1	83	83	27	106	A
comp136_c0	158	A	R	463	453	0.4945	2	2	34	34	0.98	1	1	198	265	371	82	G
comp136_c0	162	G	R	448	476	0.5152	2	2	35	32	0.98	1	1	165	283	330	146	A
comp136_c0	187	C	M	654	316	0.3258	2	2	35	36	0.98	1	1	102	552	21	295	A
comp136_c0	189	A	M	424	531	0.556	2	2	33	35	0.98	1	1	89	335	23	508	C
comp136_c0	198	A	M	433	558	0.5631	2	2	36	37	0.98	1	1	92	341	28	530	C
comp136_c0	200	C	Y	442	563	0.5602	2	2	36	37	0.98	1	1	94	348	28	535	T
comp136_c0	279	T	Y	171	97	0.3619	2	2	36	36	0.98	1	1	87	84	54	43	C
comp136_c0	287	A	R	147	85	0.3664	2	2	36	36	0.98	1	1	66	81	53	32	G
comp136_c0	304	G	R	150	68	0.3119	2	2	35	35	0.98	1	1	77	73	39	29	A
comp136_c0	360	G	S	86	139	0.6178	2	2	38	37	0.98	1	1	23	63	67	72	C
comp138_c0	2062	G	S	335	152	0.3121	2	2	38	38	0.98	1	1	157	178	78	74	C
comp138_c0	2101	A	W	152	359	0.7025	2	2	37	36	0.98	1	1	78	74	156	203	T
comp138_c0	2128	T	Y	244	107	0.3048	2	2	37	36	0.98	1	1	53	191	68	39	C
comp138_c0	2443	C	Y	34	25	0.4237	2	2	35	35	0.98	1	1	29	5	2	23	T
comp1414_c0	1002	G	K	10	5	0.3333	1	2	38	37	0.98	1	1	0	10	4	1	T
comp141_c0	269	G	R	411	423	0.5072	2	2	35	36	0.98	1	1	306	105	412	11	A
comp141_c0	329	C	S	282	431	0.6045	2	2	36	34	0.98	1	1	178	104	412	19	G
comp141_c0	330	G	K	280	429	0.6051	2	2	35	33	0.98	1	1	178	102	410	19	T
comp141_c0	395	T	Y	429	674	0.6111	2	2	36	37	0.98	1	1	224	205	221	453	C
comp141_c0	407	A	M	458	692	0.6017	2	2	37	36	0.98	1	1	234	224	256	436	C
comp141_c0	409	G	S	461	686	0.5981	2	2	37	37	0.98	1	1	235	226	259	427	C
comp141_c0	500	A	R	737	567	0.4348	2	2	36	37	0.98	1	1	452	285	298	269	G
comp141_c0	534	C	M	657	853	0.5649	2	2	38	38	0.98	1	1	452	205	589	264	A
comp141_c0	536	T	W	661	862	0.566	2	2	36	38	0.98	1	1	450	211	588	274	A
comp141_c0	538	C	Y	666	860	0.5636	2	2	38	38	0.98	1	1	450	216	575	285	T
comp141_c0	558	G	K	752	972	0.5638	2	2	37	36	0.98	1	1	515	237	653	319	T
comp141_c0	566	C	Y	768	1060	0.5799	2	2	37	37	0.98	1	1	529	239	691	369	T
comp141_c0	608	T	Y	1048	795	0.4314	2	2	37	37	0.98	1	1	398	650	398	397	C
comp141_c0	650	A	R	798	991	0.5539	2	2	36	38	0.98	1	1	251	547	398	593	G
comp141_c0	656	G	R	795	978	0.5516	2	2	37	37	0.98	1	1	250	545	378	600	A
comp141_c0	666	A	R	728	898	0.5523	2	2	38	38	0.98	1	1	262	466	378	520	G
comp141_c0	706	T	W	630	377	0.3744	2	2	36	38	0.98	1	1	263	367	146	231	A
comp141_c0	721	C	M	485	562	0.5368	2	2	36	35	0.98	1	1	224	261	223	339	A
comp141_c0	724	T	W	447	531	0.5429	2	2	36	35	0.98	1	1	216	231	212	319	A
comp141_c0	731	T	W	423	538	0.5598	2	2	36	36	0.98	1	1	206	217	184	354	A
comp141_c0	742	G	K	397	470	0.5421	2	2	36	37	0.98	1	1	180	217	143	327	T
comp141_c0	743	A	R	403	496	0.5517	2	2	36	37	0.98	1	1	177	226	150	346	G
comp141_c0	775	T	K	441	269	0.3789	2	2	37	36	0.98	1	1	92	349	84	185	G
comp141_c0	779	G	S	439	250	0.3628	2	2	38	37	0.98	1	1	91	348	67	183	C
comp141_c0	797	G	R	433	233	0.3498	2	2	38	36	0.98	1	1	54	379	31	202	A
comp141_c0	818	G	K	334	180	0.3502	2	2	37	39	0.98	1	1	60	274	10	170	T
comp141_c0	829	A	M	285	176	0.3818	2	2	37	39	0.98	1	1	59	226	3	173	C
comp1421_c0	3727	C	G	1	13	0.9286	1	2	41	34	0.98	1	1	0	1	1	12	G
comp1421_c0	3732	G	A	1	17	0.9444	1	2	41	34	0.98	1	1	0	1	2	15	A
comp1422_c0	299	C	S	18	9	0.3333	2	2	33	32	0.98	1	1	3	15	2	7	G
comp142_c0	812	C	Y	186	108	0.3673	2	2	36	36	0.98	1	1	80	106	44	64	T
comp142_c0	826	G	R	173	115	0.3993	2	2	36	35	0.98	1	1	89	84	48	67	A
comp142_c0	830	T	W	166	116	0.4113	2	2	34	34	0.98	1	1	86	80	49	67	A
comp142_c0	872	T	K	140	122	0.4656	2	2	34	33	0.98	1	1	91	49	76	46	G
comp142_c0	945	C	S	80	100	0.5556	1	2	37	35	0.98	1	1	80	0	84	16	G
comp142_c0	951	T	Y	90	80	0.4706	2	2	37	33	0.98	1	1	86	4	78	2	C
comp1430_c0	344	G	R	266	116	0.3037	2	2	36	33	0.98	1	1	106	160	75	41	A
comp1430_c0	370	C	S	195	130	0.4	2	2	36	37	0.98	1	1	99	96	72	58	G
comp1430_c0	463	T	W	93	71	0.4329	1	2	38	38	0.98	1	1	0	93	1	70	A
comp1430_c0	475	A	R	81	67	0.4527	1	2	37	37	0.98	1	1	0	81	1	66	G
comp1436_c0	935	C	Y	88	79	0.4731	2	2	37	36	0.98	1	1	56	32	38	41	T
comp1448_c0	1324	C	Y	34	19	0.3585	2	2	37	35	0.98	1	1	11	23	15	4	T
comp1448_c0	1380	A	W	22	33	0.6	2	2	39	38	0.98	1	1	9	13	22	11	T
comp1448_c0	1486	T	Y	24	38	0.6129	2	2	38	38	0.98	1	1	13	11	11	27	C
comp1448_c0	1493	T	Y	28	36	0.5625	2	2	38	39	0.98	1	1	15	13	9	27	C
comp1458_c0	1181	T	C	17	96	0.8496	2	2	37	35	0.98	1	1	16	1	32	64	C
comp1458_c0	1190	A	T	23	81	0.7788	2	2	38	37	0.98	1	1	22	1	27	54	T
comp1458_c0	1193	T	K	29	80	0.7339	2	2	37	37	0.98	1	1	28	1	23	57	G
comp1458_c0	1205	T	W	40	81	0.6694	2	2	38	38	0.98	1	1	39	1	17	64	A
comp1458_c0	1223	A	R	65	70	0.5185	2	2	38	38	0.98	1	1	64	1	2	68	G
comp145_c0	278	A	R	503	236	0.3194	2	2	36	37	0.98	1	1	190	313	82	154	G
comp145_c0	324	C	M	375	193	0.3398	2	2	37	37	0.98	1	1	196	179	79	114	A
comp145_c0	393	G	R	398	286	0.4181	2	2	34	36	0.98	1	1	211	187	281	5	A
comp145_c0	413	T	Y	360	367	0.5048	2	2	33	36	0.98	1	1	182	178	350	17	C
comp145_c0	422	G	S	342	387	0.5309	2	2	35	35	0.98	1	1	164	178	315	72	C
comp145_c0	446	T	Y	314	488	0.6085	2	2	36	35	0.98	1	1	123	191	332	156	C
comp145_c0	449	A	M	301	500	0.6242	2	2	33	35	0.98	1	1	114	187	334	166	C
comp145_c0	455	A	R	284	504	0.6396	2	2	36	35	0.98	1	1	91	193	333	171	G
comp1464_c0	1059	C	M	6	7	0.5385	2	2	39	39	0.98	1	1	1	5	4	3	A
comp1464_c0	2816	T	K	13	21	0.6176	1	2	38	36	0.98	1	1	0	13	15	6	G
comp1464_c0	2818	A	W	13	21	0.6176	1	2	38	32	0.98	1	1	0	13	15	6	T
comp1464_c0	2820	G	S	13	21	0.6176	1	2	37	36	0.98	1	1	0	13	15	6	C
comp1466_c0	614	T	W	175	98	0.359	2	2	36	37	0.98	1	1	63	112	40	58	A
comp1466_c0	1193	T	Y	49	24	0.3288	2	2	32	33	0.98	1	1	18	31	8	16	C
comp1479_c0	999	G	R	12	18	0.6	2	2	38	37	0.98	1	1	8	4	4	14	A
comp1479_c0	1019	G	R	22	14	0.3889	2	2	38	37	0.98	1	1	14	8	4	10	A
comp1481_c0	42	C	S	46	44	0.4889	2	2	36	37	0.98	1	1	31	15	31	13	G
comp1482_c0	122	C	M	34	36	0.5143	2	2	37	38	0.98	1	1	30	4	34	2	A
comp1482_c0	210	A	R	158	86	0.3525	2	2	37	36	0.98	1	1	132	26	54	32	G
comp1482_c0	374	T	Y	254	112	0.306	2	2	36	37	0.98	1	1	146	108	88	24	C
comp1482_c0	391	A	R	281	140	0.3325	2	2	36	36	0.98	1	1	137	144	84	56	G
comp1482_c0	425	A	R	270	142	0.3447	2	2	37	36	0.98	1	1	117	153	60	82	G
comp1482_c0	530	C	Y	246	117	0.3223	2	2	37	37	0.98	1	1	151	95	67	50	T
comp1482_c0	551	T	Y	129	219	0.6293	2	2	37	36	0.98	1	1	86	43	148	71	C
comp1482_c0	604	G	K	282	135	0.3237	2	2	35	36	0.98	1	1	166	116	76	59	T
comp1482_c0	689	T	Y	320	141	0.3059	2	2	36	37	0.98	1	1	153	167	75	66	C
comp1482_c0	713	A	R	278	126	0.3119	2	2	37	37	0.98	1	1	141	137	64	62	G
comp1482_c0	764	A	R	274	118	0.301	2	2	35	35	0.98	1	1	136	138	46	72	G
comp1482_c0	869	T	Y	249	134	0.3499	2	2	36	36	0.98	1	1	170	79	98	36	C
comp1484_c0	854	T	K	18	19	0.5135	1	2	38	37	0.98	1	1	0	18	12	7	G
comp1484_c0	869	C	T	10	40	0.8	1	2	37	37	0.98	1	1	0	10	28	12	T
comp1484_c0	870	A	T	10	40	0.8	1	2	33	38	0.98	1	1	0	10	28	12	T
comp1484_c0	884	A	G	8	58	0.8788	1	2	39	39	0.98	1	1	0	8	39	19	G
comp1484_c0	1208	A	W	95	54	0.3624	2	2	33	36	0.98	1	1	37	58	50	4	T
comp1484_c0	1223	A	W	84	53	0.3869	2	2	38	35	0.98	1	1	30	54	30	23	T
comp1484_c0	1232	C	S	76	58	0.4328	2	2	38	35	0.98	1	1	26	50	20	38	G
comp1484_c0	1235	T	W	76	64	0.4571	2	2	37	35	0.98	1	1	26	50	25	39	A
comp1484_c0	1241	A	R	75	72	0.4898	2	2	37	36	0.98	1	1	26	49	32	40	G
comp1484_c0	1253	T	Y	87	64	0.4238	2	2	37	37	0.98	1	1	42	45	24	40	C
comp1484_c0	1258	C	Y	100	47	0.3197	2	2	37	37	0.98	1	1	54	46	10	37	T
comp1484_c0	1775	C	T	9	29	0.7632	1	2	38	37	0.98	1	1	9	0	9	20	T
comp1484_c0	1783	A	T	9	30	0.7692	1	2	40	36	0.98	1	1	9	0	8	22	T
comp1484_c0	1793	G	A	9	29	0.7632	1	2	40	37	0.98	1	1	9	0	6	23	A
comp1484_c0	1796	C	Y	9	26	0.7429	1	2	39	38	0.98	1	1	9	0	6	20	T
comp1484_c0	1799	G	R	9	23	0.7188	1	2	38	38	0.98	1	1	9	0	5	18	A
comp1485_c0	3088	G	S	13	31	0.7045	2	2	38	39	0.98	1	1	7	6	12	19	C
comp1485_c0	3101	G	K	12	29	0.7073	2	2	38	37	0.98	1	1	7	5	12	17	T
comp1485_c0	3113	T	A	12	38	0.76	2	2	39	37	0.98	1	1	7	5	26	12	A
comp1485_c0	3123	G	C	12	37	0.7551	2	2	39	37	0.98	1	1	7	5	26	11	C
comp1486_c0	124	T	Y	147	88	0.3745	2	2	34	34	0.98	1	1	39	108	11	77	C
comp1486_c0	149	T	Y	122	75	0.3807	2	2	36	38	0.98	1	1	17	105	4	71	C
comp148_c0	532	C	S	155	120	0.4364	2	2	37	37	0.98	1	1	126	29	90	30	G
comp148_c0	1685	T	K	140	71	0.3365	2	2	38	38	0.98	1	1	35	105	23	48	G
comp1498_c0	43	T	Y	90	168	0.6512	2	2	38	37	0.98	1	1	82	8	154	14	C
comp1498_c0	61	G	R	91	181	0.6654	2	2	37	35	0.98	1	1	83	8	136	45	A
comp1498_c0	64	C	Y	90	185	0.6727	2	2	39	37	0.98	1	1	82	8	140	45	T
comp1498_c0	73	C	Y	90	192	0.6809	2	2	38	37	0.98	1	1	82	8	136	56	T
comp1498_c0	76	T	Y	90	197	0.6864	2	2	39	37	0.98	1	1	82	8	136	61	C
comp1510_c0	1778	G	R	4	5	0.5556	2	2	38	34	0.98	1	1	2	2	1	4	A
comp1514_c4	211	A	T	3	50	0.9434	1	2	39	37	0.98	1	1	0	3	43	7	T
comp1514_c4	216	G	S	15	41	0.7321	2	2	38	37	0.98	1	1	6	9	39	2	C
comp1514_c4	240	G	S	28	54	0.6585	2	2	38	38	0.98	1	1	19	9	48	6	C
comp1514_c4	249	A	R	56	65	0.5372	2	2	37	37	0.98	1	1	38	18	58	7	G
comp1514_c4	285	T	W	101	75	0.4261	2	2	38	37	0.98	1	1	68	33	54	21	A
comp1514_c4	292	C	Y	64	122	0.6559	2	2	38	37	0.98	1	1	38	26	84	38	T
comp1514_c4	316	A	W	77	133	0.6333	2	2	38	37	0.98	1	1	41	36	60	73	T
comp1514_c4	325	G	S	91	128	0.5845	2	2	38	37	0.98	1	1	47	44	51	77	C
comp1514_c4	370	T	Y	157	100	0.3891	2	2	37	38	0.98	1	1	73	84	52	48	C
comp1514_c4	468	C	S	118	76	0.3918	2	2	38	39	0.98	1	1	43	75	30	46	G
comp1514_c4	1075	A	R	153	78	0.3377	2	2	37	37	0.98	1	1	66	87	32	46	G
comp1514_c4	1090	T	W	147	68	0.3163	2	2	38	38	0.98	1	1	49	98	23	45	A
comp1525_c0	908	A	R	58	61	0.5126	2	2	35	35	0.98	1	1	47	11	15	46	G
comp1527_c0	138	G	S	18	8	0.3077	2	2	36	32	0.98	1	1	5	13	7	1	C
comp1527_c0	139	A	R	21	9	0.3	2	2	34	34	0.98	1	1	8	13	8	1	G
comp1531_c0	111	T	A	9	27	0.75	2	2	37	36	0.98	1	1	7	2	8	19	A
comp1531_c0	203	T	Y	20	35	0.6364	2	2	35	35	0.98	1	1	13	7	23	12	C
comp1531_c0	204	C	M	20	35	0.6364	2	2	36	36	0.98	1	1	13	7	23	12	A
comp1531_c0	205	C	M	19	35	0.6481	2	2	36	35	0.98	1	1	13	6	23	12	A
comp1531_c0	220	T	Y	23	36	0.6102	2	2	36	35	0.98	1	1	15	8	21	15	C
comp1531_c0	224	C	Y	20	42	0.6774	2	2	36	32	0.98	1	1	14	6	22	20	T
comp1531_c0	3259	A	M	13	10	0.4348	1	2	38	38	0.98	1	1	0	13	3	7	C
comp1531_c0	3276	G	S	3	5	0.625	1	2	35	38	0.98	1	1	0	3	2	3	C
comp1533_c0	114	G	R	9	6	0.4	1	2	35	38	0.98	1	1	9	0	5	1	A
comp1533_c0	176	T	W	43	34	0.4416	2	2	35	38	0.98	1	1	38	5	31	3	A
comp1533_c0	304	A	R	102	93	0.4769	2	2	36	36	0.98	1	1	64	38	45	48	G
comp1533_c0	706	A	R	30	78	0.7222	2	2	36	36	0.98	1	1	5	25	32	46	G
comp1534_c0	860	G	R	39	19	0.3276	1	2	38	38	0.98	1	1	0	39	17	2	A
comp1556_c0	359	G	R	110	64	0.3678	2	2	37	38	0.98	1	1	52	58	39	25	A
comp1556_c0	372	C	Y	96	59	0.3806	2	2	38	38	0.98	1	1	47	49	36	23	T
comp1572_c0	240	G	K	102	54	0.3462	2	2	36	37	0.98	1	1	28	74	14	40	T
comp1572_c0	265	G	R	93	40	0.3008	2	2	37	35	0.98	1	1	30	63	14	26	A
comp1572_c0	286	C	Y	64	30	0.3191	2	2	36	35	0.98	1	1	30	34	20	10	T
comp1572_c0	364	T	K	20	17	0.4595	2	2	33	35	0.98	1	1	9	11	11	6	G
comp1572_c0	365	C	M	18	15	0.4545	2	2	36	34	0.98	1	1	8	10	10	5	A
comp1572_c0	367	G	R	23	17	0.425	2	2	34	31	0.98	1	1	10	13	10	7	A
comp1572_c0	377	G	R	51	24	0.32	2	2	35	33	0.98	1	1	18	33	12	12	A
comp1572_c0	389	C	S	48	22	0.3143	2	2	36	36	0.98	1	1	18	30	6	16	G
comp1572_c0	407	C	Y	48	22	0.3143	2	2	35	34	0.98	1	1	22	26	10	12	T
comp1572_c0	486	C	M	33	27	0.45	2	2	35	33	0.98	1	1	17	16	10	17	A
comp1572_c0	531	A	M	28	21	0.4286	2	2	36	34	0.98	1	1	7	21	4	17	C
comp1572_c0	1343	T	Y	44	21	0.3231	2	2	35	34	0.98	1	1	39	5	10	11	C
comp1572_c0	1344	G	R	43	19	0.3065	2	2	36	31	0.98	1	1	38	5	8	11	A
comp1572_c0	1383	C	S	62	66	0.5156	2	2	38	36	0.98	1	1	61	1	39	27	G
comp1572_c0	1409	T	W	78	40	0.339	2	2	39	34	0.98	1	1	76	2	26	14	A
comp1574_c0	793	C	M	43	19	0.3065	2	2	37	37	0.98	1	1	3	40	16	3	A
comp1574_c0	797	C	Y	38	22	0.3667	1	2	35	36	0.98	1	1	0	38	19	3	T
comp1574_c0	808	A	M	30	25	0.4545	1	2	37	35	0.98	1	1	0	30	22	3	C
comp1575_c0	336	A	W	19	11	0.3667	2	2	39	36	0.98	1	1	3	16	8	3	T
comp1577_c0	1107	G	K	98	67	0.4061	2	2	37	36	0.98	1	1	60	38	64	3	T
comp1577_c0	1117	G	R	88	68	0.4359	2	2	35	35	0.98	1	1	61	27	60	8	A
comp1577_c0	1132	G	R	82	83	0.503	2	2	36	35	0.98	1	1	62	20	45	38	A
comp1577_c0	1147	A	G	0	146	1	0	2	0	35	0.98	0	1	0	0	89	57	G
comp158_c0	628	A	R	744	332	0.3086	2	2	37	39	0.98	1	1	370	374	190	142	G
comp1594_c0	571	T	W	29	33	0.5323	2	2	40	37	0.98	1	1	28	1	5	28	A
comp1594_c0	577	G	R	30	26	0.4643	2	2	40	35	0.98	1	1	29	1	4	22	A
comp1597_c0	726	G	R	35	32	0.4776	2	2	37	35	0.98	1	1	19	16	15	17	A
comp159_c1	209	C	T	154	1238	0.8894	2	2	38	37	0.98	1	1	131	23	912	326	T
comp159_c1	218	C	T	178	1182	0.8691	2	2	38	37	0.98	1	1	151	27	810	372	T
comp159_c1	274	A	G	285	1156	0.8022	2	2	37	38	0.98	1	1	170	115	527	629	G
comp159_c1	294	C	A	310	1117	0.7828	2	2	37	37	0.98	1	1	177	133	466	651	A
comp159_c1	304	C	M	302	887	0.746	2	2	37	37	0.98	1	1	161	141	368	519	A
comp159_c1	336	T	C	313	961	0.7543	2	2	37	37	0.98	1	1	126	187	429	532	C
comp159_c1	337	T	K	316	940	0.7484	2	2	36	37	0.98	1	1	126	190	421	519	G
comp159_c1	341	A	C	273	1030	0.7905	2	2	36	37	0.98	1	1	92	181	503	527	C
comp1600_c0	823	A	R	39	47	0.5465	2	2	40	37	0.98	1	1	1	38	33	14	G
comp1600_c0	827	C	Y	39	46	0.5412	2	2	39	38	0.98	1	1	1	38	31	15	T
comp1603_c0	132	T	Y	67	62	0.4806	2	2	35	36	0.98	1	1	41	26	45	17	C
comp1603_c0	259	G	R	76	41	0.3504	2	2	37	36	0.98	1	1	34	42	21	20	A
comp1603_c0	266	A	R	74	44	0.3729	2	2	37	38	0.98	1	1	37	37	22	22	G
comp1603_c0	385	G	S	183	108	0.3711	2	2	37	37	0.98	1	1	102	81	62	46	C
comp1603_c0	984	C	Y	230	118	0.3391	2	2	37	37	0.98	1	1	91	139	58	60	T
comp1605_c0	12	T	C	2	93	0.9789	1	2	40	37	0.98	1	1	2	0	68	25	C
comp160_c0	908	G	S	565	278	0.3298	2	2	35	36	0.98	1	1	273	292	203	75	C
comp160_c0	971	G	R	543	265	0.328	2	2	36	35	0.98	1	1	217	326	95	170	A
comp160_c0	986	A	M	513	251	0.3285	2	2	36	35	0.98	1	1	256	257	100	151	C
comp160_c0	992	G	K	509	261	0.339	2	2	35	34	0.98	1	1	264	245	106	155	T
comp160_c0	999	G	S	502	258	0.3395	2	2	36	36	0.98	1	1	277	225	104	154	C
comp160_c0	1000	A	W	498	256	0.3395	2	2	35	36	0.98	1	1	274	224	102	154	T
comp160_c0	1007	C	S	508	261	0.3394	2	2	36	36	0.98	1	1	294	214	108	153	G
comp1612_c0	1840	C	Y	31	15	0.3261	2	2	36	35	0.98	1	1	11	20	4	11	T
comp1612_c0	1996	A	W	9	5	0.3571	2	2	35	32	0.98	1	1	2	7	3	2	T
comp1612_c0	2028	T	Y	8	4	0.3333	2	2	35	34	0.98	1	1	2	6	1	3	C
comp161_c0	1104	A	R	335	958	0.7409	2	2	37	37	0.98	1	1	155	180	562	396	G
comp161_c0	1105	G	R	336	952	0.7391	2	2	37	37	0.98	1	1	154	182	558	394	A
comp161_c0	1134	T	C	196	602	0.7544	2	2	38	38	0.98	1	1	92	104	317	285	C
comp161_c0	1135	G	C	206	632	0.7542	2	2	37	37	0.98	1	1	90	116	317	315	C
comp161_c0	1138	T	G	207	948	0.8208	2	2	38	38	0.98	1	1	90	117	480	468	G
comp161_c0	1146	T	A	209	1068	0.8363	2	2	37	38	0.98	1	1	91	118	541	527	A
comp161_c0	1150	T	C	330	1001	0.7521	2	2	37	37	0.98	1	1	166	164	501	500	C
comp161_c0	2007	G	S	21	11	0.3438	2	2	38	38	0.98	1	1	16	5	6	5	C
comp161_c0	2078	A	W	17	9	0.3462	2	2	35	35	0.98	1	1	1	16	3	6	T
comp161_c0	2095	T	Y	17	10	0.3704	2	2	36	35	0.98	1	1	1	16	4	6	C
comp161_c0	2174	C	S	13	6	0.3158	2	2	35	37	0.98	1	1	8	5	4	2	G
comp161_c0	2209	A	R	11	5	0.3125	2	2	35	34	0.98	1	1	6	5	3	2	G
comp161_c0	2242	C	S	11	5	0.3125	2	2	36	35	0.98	1	1	4	7	3	2	G
comp1625_c0	397	A	G	6	27	0.8182	2	2	34	36	0.98	1	1	3	3	9	18	G
comp162_c0	250	G	K	973	428	0.3055	2	2	37	37	0.98	1	1	353	620	348	80	T
comp162_c0	268	A	M	757	562	0.4261	2	2	38	38	0.98	1	1	334	423	396	166	C
comp162_c0	280	C	Y	669	614	0.4786	2	2	38	38	0.98	1	1	299	370	412	202	T
comp162_c0	319	G	K	750	388	0.3409	2	2	38	36	0.98	1	1	398	352	182	206	T
comp162_c0	325	A	W	796	397	0.3328	2	2	38	37	0.98	1	1	377	419	171	226	T
comp1637_c0	1645	T	Y	105	95	0.475	2	2	38	37	0.98	1	1	65	40	35	60	C
comp1641_c0	222	A	R	18	9	0.3333	2	2	39	38	0.98	1	1	16	2	5	4	G
comp1648_c0	668	C	A	0	119	1	0	2	0	35	0.98	0	1	0	0	51	68	A
comp1648_c0	854	G	A	2	49	0.9608	1	2	40	36	0.98	1	1	2	0	7	42	A
comp1657_c2	428	A	R	3	5	0.625	1	2	39	32	0.98	1	1	3	0	2	3	G
comp1667_c0	132	G	R	17	10	0.3704	2	2	32	28	0.98	1	1	8	9	5	5	A
comp1667_c0	279	A	M	8	4	0.3333	2	2	35	33	0.98	1	1	6	2	3	1	C
comp1667_c0	387	G	R	16	10	0.3846	2	2	34	35	0.98	1	1	9	7	4	6	A
comp1667_c0	397	G	R	18	16	0.4706	2	2	34	34	0.98	1	1	8	10	9	7	A
comp1667_c0	482	T	W	37	28	0.4308	2	2	35	35	0.98	1	1	27	10	15	13	A
comp1667_c0	656	A	R	75	38	0.3363	2	2	37	38	0.98	1	1	26	49	17	21	G
comp1667_c0	660	A	R	76	34	0.3091	2	2	37	38	0.98	1	1	25	51	12	22	G
comp1667_c0	696	T	Y	78	34	0.3036	2	2	39	38	0.98	1	1	36	42	14	20	C
comp1667_c0	783	G	R	75	35	0.3182	2	2	37	38	0.98	1	1	36	39	15	20	A
comp1667_c0	828	A	R	100	46	0.3151	2	2	37	38	0.98	1	1	58	42	24	22	G
comp1667_c0	888	T	Y	89	45	0.3358	2	2	38	38	0.98	1	1	40	49	28	17	C
comp1667_c0	1355	A	R	98	53	0.351	2	2	37	37	0.98	1	1	37	61	19	34	G
comp1667_c0	1364	T	W	89	47	0.3456	2	2	37	38	0.98	1	1	36	53	27	20	A
comp1667_c0	1702	C	Y	279	138	0.3309	2	2	36	35	0.98	1	1	111	168	47	91	T
comp1667_c0	1840	C	M	62	30	0.3261	2	2	36	37	0.98	1	1	39	23	17	13	A
comp1667_c0	1920	A	W	118	52	0.3059	2	2	37	38	0.98	1	1	78	40	37	15	T
comp1667_c0	1958	T	Y	145	63	0.3029	2	2	36	36	0.98	1	1	70	75	31	32	C
comp1667_c0	1986	A	M	125	61	0.328	2	2	35	37	0.98	1	1	62	63	32	29	C
comp1667_c0	2007	C	Y	121	65	0.3495	2	2	37	37	0.98	1	1	54	67	36	29	T
comp1667_c0	2089	C	Y	114	75	0.3968	2	2	37	37	0.98	1	1	52	62	34	41	T
comp1667_c0	2141	A	R	91	67	0.4241	2	2	36	36	0.98	1	1	55	36	34	33	G
comp1667_c0	2182	C	M	121	64	0.3459	2	2	38	37	0.98	1	1	74	47	38	26	A
comp1667_c0	2352	T	W	88	60	0.4054	2	2	37	38	0.98	1	1	53	35	24	36	A
comp1667_c0	2368	A	R	94	61	0.3935	2	2	37	37	0.98	1	1	59	35	28	33	G
comp1667_c0	2643	C	S	6	4	0.4	2	2	38	38	0.98	1	1	1	5	1	3	G
comp1669_c0	924	A	R	163	77	0.3208	2	2	37	38	0.98	1	1	82	81	53	24	G
comp1669_c0	935	T	K	162	81	0.3333	2	2	37	35	0.98	1	1	82	80	43	38	G
comp1669_c0	936	A	R	163	81	0.332	2	2	38	36	0.98	1	1	82	81	43	38	G
comp1669_c0	945	T	Y	153	105	0.407	2	2	37	37	0.98	1	1	82	71	60	45	C
comp1669_c0	975	T	Y	141	132	0.4835	2	2	37	35	0.98	1	1	57	84	59	73	C
comp1669_c0	987	A	W	142	108	0.432	2	2	38	37	0.98	1	1	46	96	24	84	T
comp1669_c0	993	G	R	154	102	0.3984	2	2	36	36	0.98	1	1	47	107	22	80	A
comp1669_c0	996	C	M	154	102	0.3984	2	2	35	36	0.98	1	1	47	107	19	83	A
comp1669_c0	999	C	Y	154	94	0.379	2	2	38	37	0.98	1	1	47	107	14	80	T
comp1669_c0	1023	G	R	146	73	0.3333	2	2	37	37	0.98	1	1	43	103	1	72	A
comp1685_c0	979	G	C	1	10	0.9091	1	2	40	35	0.98	1	1	0	1	2	8	C
comp1685_c0	980	C	Y	3	5	0.625	1	2	39	36	0.98	1	1	0	3	2	3	T
comp1686_c0	568	G	T	0	162	1	0	2	0	32	0.98	0	1	0	0	36	126	T
comp1686_c0	571	G	T	0	166	1	0	2	0	33	0.98	0	1	0	0	36	130	T
comp1686_c0	586	G	A	0	146	1	0	2	0	34	0.98	0	1	0	0	22	124	A
comp1686_c0	589	G	C	0	146	1	0	2	0	36	0.98	0	1	0	0	21	125	C
comp1686_c0	592	C	G	0	140	1	0	2	0	36	0.98	0	1	0	0	17	123	G
comp169_c0	715	T	K	129	73	0.3614	1	2	38	37	0.98	1	1	0	129	35	38	G
comp16_c0	1124	T	W	25	29	0.537	2	2	35	34	0.98	1	1	18	7	1	28	A
comp16_c0	1126	T	W	27	32	0.5424	2	2	34	34	0.98	1	1	21	6	3	29	A
comp1702_c0	51	C	S	8	4	0.3333	2	2	33	38	0.98	1	1	7	1	3	1	G
comp1706_c1	100	G	R	25	12	0.3243	2	2	37	34	0.98	1	1	17	8	7	5	A
comp1706_c1	189	G	R	23	14	0.3784	2	2	38	33	0.98	1	1	7	16	7	7	A
comp1706_c1	4420	C	Y	17	9	0.3462	2	2	36	33	0.98	1	1	15	2	5	4	T
comp1706_c1	4421	C	S	18	10	0.3571	2	2	36	33	0.98	1	1	15	3	6	4	G
comp170_c0	619	C	T	88	610	0.8739	2	2	36	37	0.98	1	1	33	55	279	331	T
comp170_c0	620	C	T	89	611	0.8729	2	2	37	37	0.98	1	1	34	55	276	335	T
comp170_c0	958	G	R	5	5	0.5	2	2	38	33	0.98	1	1	3	2	2	3	A
comp170_c0	967	T	Y	3	7	0.7	1	2	37	37	0.98	1	1	3	0	2	5	C
comp1727_c0	738	C	G	50	159	0.7608	2	2	35	35	0.98	1	1	43	7	126	33	G
comp1727_c0	756	T	Y	47	115	0.7099	2	2	33	34	0.98	1	1	41	6	103	12	C
comp1727_c0	768	G	R	24	67	0.7363	2	2	32	31	0.98	1	1	22	2	59	8	A
comp1728_c0	137	T	C	19	91	0.8273	2	2	35	37	0.98	1	1	11	8	1	90	C
comp1732_c0	1133	C	Y	33	59	0.6413	2	2	36	34	0.98	1	1	6	27	34	25	T
comp1736_c0	90	A	M	4	10	0.7143	1	2	38	38	0.98	1	1	4	0	8	2	C
comp1736_c0	144	G	R	6	12	0.6667	1	2	38	34	0.98	1	1	6	0	5	7	A
comp1736_c0	377	A	R	11	7	0.3889	2	2	37	34	0.98	1	1	9	2	3	4	G
comp1736_c0	464	C	Y	11	15	0.5769	2	2	40	38	0.98	1	1	4	7	13	2	T
comp1736_c0	542	C	Y	9	16	0.64	2	2	37	37	0.98	1	1	5	4	6	10	T
comp1736_c0	2172	A	R	7	16	0.6957	2	2	35	35	0.98	1	1	5	2	5	11	G
comp1736_c0	2281	A	R	3	6	0.6667	1	2	38	39	0.98	1	1	3	0	2	4	G
comp1743_c0	182	G	K	79	207	0.7238	2	2	40	37	0.98	1	1	30	49	99	108	T
comp1743_c0	194	T	W	79	183	0.6985	2	2	39	37	0.98	1	1	30	49	72	111	A
comp1752_c0	148	T	K	6	9	0.6	2	2	37	34	0.98	1	1	4	2	3	6	G
comp1752_c0	170	T	W	17	9	0.3462	2	2	39	33	0.98	1	1	15	2	4	5	A
comp1752_c0	174	G	R	17	8	0.32	2	2	38	36	0.98	1	1	15	2	3	5	A
comp1752_c0	449	T	G	2	39	0.9512	2	2	33	35	0.98	1	1	1	1	25	14	G
comp175_c0	861	A	R	223	443	0.6652	2	2	38	37	0.98	1	1	96	127	198	245	G
comp175_c0	867	C	A	97	543	0.8484	2	2	38	36	0.98	1	1	48	49	247	296	A
comp175_c0	870	T	C	85	520	0.8595	2	2	39	37	0.98	1	1	42	43	231	289	C
comp175_c0	891	G	A	83	309	0.7883	2	2	36	36	0.98	1	1	47	36	147	162	A
comp175_c0	903	G	A	58	237	0.8034	2	2	34	36	0.98	1	1	35	23	85	152	A
comp1760_c0	455	A	R	36	23	0.3898	2	2	33	34	0.98	1	1	26	10	18	5	G
comp1760_c0	896	T	K	152	86	0.3613	2	2	37	37	0.98	1	1	137	15	57	29	G
comp1760_c0	965	G	S	62	66	0.5156	2	2	34	36	0.98	1	1	41	21	4	62	C
comp1760_c0	966	C	M	54	66	0.55	2	2	34	35	0.98	1	1	35	19	4	62	A
comp1760_c0	997	G	R	218	135	0.3824	2	2	37	36	0.98	1	1	94	124	72	63	A
comp1760_c0	1081	C	Y	135	99	0.4231	2	2	37	36	0.98	1	1	49	86	39	60	T
comp1760_c0	1139	A	R	85	86	0.5029	2	2	38	36	0.98	1	1	38	47	39	47	G
comp1760_c0	1184	A	R	77	53	0.4077	2	2	38	36	0.98	1	1	44	33	12	41	G
comp1760_c0	1194	A	R	68	45	0.3982	2	2	37	35	0.98	1	1	38	30	6	39	G
comp1760_c0	1196	A	W	68	38	0.3585	2	2	38	38	0.98	1	1	38	30	2	36	T
comp1766_c1	949	G	S	25	22	0.4681	2	2	36	38	0.98	1	1	9	16	2	20	C
comp1767_c1	225	C	A	2	18	0.9	2	2	40	40	0.98	1	1	1	1	1	17	A
comp1767_c1	226	A	G	2	18	0.9	2	2	41	39	0.98	1	1	1	1	1	17	G
comp1768_c0	598	C	Y	32	15	0.3191	2	2	33	34	0.98	1	1	7	25	3	12	T
comp177_c1	230	G	R	597	304	0.3374	2	2	36	37	0.98	1	1	245	352	160	144	A
comp1787_c0	447	T	K	64	28	0.3043	2	2	36	38	0.98	1	1	45	19	19	9	G
comp1793_c0	1850	A	R	31	33	0.5156	2	2	38	37	0.98	1	1	8	23	6	27	G
comp1798_c0	574	G	R	15	23	0.6053	2	2	39	37	0.98	1	1	3	12	11	12	A
comp1798_c0	603	A	R	19	17	0.4722	2	2	36	37	0.98	1	1	2	17	11	6	G
comp17_c0	582	G	S	455	436	0.4893	2	2	37	37	0.98	1	1	161	294	307	129	C
comp17_c0	612	C	Y	588	323	0.3546	2	2	37	34	0.98	1	1	287	301	240	83	T
comp17_c0	618	T	Y	264	640	0.708	2	2	36	36	0.98	1	1	106	158	427	213	C
comp17_c0	672	A	M	465	271	0.3682	2	2	36	34	0.98	1	1	341	124	140	131	C
comp17_c0	687	G	S	500	227	0.3122	2	2	36	35	0.98	1	1	289	211	99	128	C
comp17_c0	696	C	S	469	222	0.3213	2	2	36	34	0.98	1	1	279	190	90	132	G
comp17_c0	708	C	S	247	444	0.6425	2	2	35	35	0.98	1	1	70	177	240	204	G
comp17_c0	723	A	G	40	551	0.9323	2	2	32	35	0.98	1	1	9	31	166	385	G
comp17_c0	726	A	T	38	573	0.9378	2	2	30	34	0.98	1	1	9	29	158	415	T
comp17_c0	738	A	G	31	516	0.9433	2	2	38	37	0.98	1	1	2	29	71	445	G
comp17_c0	747	A	G	28	427	0.9385	2	2	37	37	0.98	1	1	1	27	21	406	G
comp1802_c0	858	T	Y	16	7	0.3043	2	2	37	37	0.98	1	1	10	6	3	4	C
comp1808_c0	189	T	K	8	21	0.7241	2	2	37	37	0.98	1	1	5	3	6	15	G
comp1808_c0	190	C	A	6	21	0.7778	2	2	38	37	0.98	1	1	3	3	6	15	A
comp1808_c0	191	A	G	6	21	0.7778	2	2	38	37	0.98	1	1	3	3	6	15	G
comp1808_c0	207	G	R	27	14	0.3415	2	2	37	39	0.98	1	1	13	14	8	6	A
comp1808_c0	686	G	R	12	10	0.4545	2	2	38	38	0.98	1	1	4	8	3	7	A
comp1808_c0	847	G	R	12	16	0.5714	2	2	38	38	0.98	1	1	6	6	12	4	A
comp1808_c0	859	G	R	13	16	0.5517	2	2	39	37	0.98	1	1	8	5	11	5	A
comp1808_c0	1157	G	R	15	13	0.4643	2	2	37	35	0.98	1	1	7	8	7	6	A
comp1809_c0	207	G	A	2	16	0.8889	2	2	31	31	0.98	1	1	1	1	11	5	A
comp1811_c0	998	C	S	57	27	0.3214	2	2	37	37	0.98	1	1	28	29	16	11	G
comp1814_c0	191	G	R	79	60	0.4317	2	2	33	34	0.98	1	1	10	69	4	56	A
comp1820_c0	667	C	Y	8	8	0.5	2	2	38	34	0.98	1	1	2	6	4	4	T
comp183_c0	518	A	C	25	79	0.7596	2	2	38	36	0.98	1	1	22	3	61	18	C
comp183_c0	522	A	M	27	67	0.7128	2	2	37	37	0.98	1	1	24	3	47	20	C
comp1845_c0	2367	G	R	13	8	0.381	2	2	37	39	0.98	1	1	1	12	3	5	A
comp1845_c0	2454	A	W	6	9	0.6	2	2	38	32	0.98	1	1	3	3	7	2	T
comp1856_c0	139	T	A	9	37	0.8043	1	2	39	37	0.98	1	1	0	9	27	10	A
comp1862_c0	131	T	Y	33	16	0.3265	2	2	38	36	0.98	1	1	27	6	2	14	C
comp1862_c0	135	T	Y	33	15	0.3125	2	2	36	33	0.98	1	1	25	8	2	13	C
comp1863_c0	4999	T	C	0	119	1	0	2	0	38	0.98	0	1	0	0	73	46	C
comp1863_c0	5000	G	A	0	113	1	0	2	0	38	0.98	0	1	0	0	67	46	A
comp1863_c0	5004	T	A	0	111	1	0	2	0	38	0.98	0	1	0	0	65	46	A
comp1863_c0	5007	T	C	0	116	1	0	2	0	38	0.98	0	1	0	0	68	48	C
comp1879_c0	3283	G	S	48	25	0.3425	2	2	36	36	0.98	1	1	24	24	18	7	C
comp1879_c0	3326	C	S	38	38	0.5	2	2	35	34	0.98	1	1	24	14	11	27	G
comp1879_c0	3438	G	R	14	20	0.5882	2	2	36	36	0.98	1	1	1	13	1	19	A
comp1879_c0	3454	G	A	5	16	0.7619	2	2	36	34	0.98	1	1	1	4	1	15	A
comp1884_c0	534	C	Y	50	30	0.375	2	2	34	35	0.98	1	1	35	15	20	10	T
comp1884_c0	555	A	M	44	19	0.3016	2	2	30	28	0.98	1	1	19	25	6	13	C
comp1887_c0	1025	T	W	62	177	0.7406	2	2	37	37	0.98	1	1	28	34	26	151	A
comp1887_c0	1043	T	Y	68	143	0.6777	2	2	38	37	0.98	1	1	30	38	3	140	C
comp1887_c0	1045	T	K	68	137	0.6683	2	2	38	37	0.98	1	1	30	38	3	134	G
comp1887_c0	1060	C	Y	79	113	0.5885	2	2	36	38	0.98	1	1	35	44	1	112	T
comp1887_c0	1061	A	R	78	113	0.5916	2	2	33	38	0.98	1	1	35	43	1	112	G
comp1887_c0	1580	G	R	36	53	0.5955	2	2	36	37	0.98	1	1	15	21	44	9	A
comp1887_c0	1595	T	W	32	61	0.6559	2	2	37	36	0.98	1	1	11	21	40	21	A
comp1887_c0	1598	G	R	33	60	0.6452	2	2	38	36	0.98	1	1	12	21	37	23	A
comp1887_c0	1614	C	Y	30	67	0.6907	2	2	37	35	0.98	1	1	12	18	21	46	T
comp1887_c0	1616	G	S	28	73	0.7228	2	2	37	35	0.98	1	1	9	19	27	46	C
comp188_c0	270	A	W	42	26	0.3824	2	2	29	34	0.98	1	1	9	33	4	22	T
comp188_c0	717	C	M	17	13	0.4333	2	2	35	36	0.98	1	1	11	6	1	12	A
comp1894_c0	518	G	R	14	31	0.6889	1	2	39	35	0.98	1	1	0	14	28	3	A
comp1894_c0	524	T	Y	14	33	0.7021	1	2	39	37	0.98	1	1	0	14	28	5	C
comp1894_c0	527	G	S	14	32	0.6957	1	2	39	37	0.98	1	1	0	14	27	5	C
comp1894_c0	529	A	W	14	37	0.7255	1	2	35	36	0.98	1	1	0	14	31	6	T
comp1894_c0	532	G	R	14	40	0.7407	1	2	40	36	0.98	1	1	0	14	34	6	A
comp1894_c0	817	G	R	49	54	0.5243	2	2	37	35	0.98	1	1	24	25	44	10	A
comp1894_c0	829	A	R	40	62	0.6078	2	2	37	36	0.98	1	1	20	20	49	13	G
comp1894_c0	832	C	Y	40	60	0.6	2	2	37	37	0.98	1	1	20	20	47	13	T
comp1894_c0	844	T	W	41	64	0.6095	2	2	38	37	0.98	1	1	20	21	33	31	A
comp1894_c0	850	A	M	39	69	0.6389	2	2	36	36	0.98	1	1	20	19	34	35	C
comp1904_c0	2101	T	Y	8	8	0.5	2	2	38	37	0.98	1	1	4	4	3	5	C
comp190_c0	117	C	T	32	168	0.84	2	2	34	32	0.98	1	1	31	1	167	1	T
comp190_c0	125	G	R	343	194	0.3613	2	2	37	37	0.98	1	1	331	12	186	8	A
comp190_c0	129	G	R	385	225	0.3689	2	2	37	37	0.98	1	1	349	36	205	20	A
comp190_c0	154	C	S	428	357	0.4548	2	2	38	38	0.98	1	1	383	45	320	37	G
comp190_c0	192	A	W	618	548	0.47	2	2	35	36	0.98	1	1	432	186	398	150	T
comp190_c0	360	T	K	566	574	0.5035	2	2	31	36	0.98	1	1	346	220	310	264	G
comp190_c0	396	C	Y	606	479	0.4415	2	2	34	32	0.98	1	1	286	320	211	268	T
comp190_c0	678	A	M	355	248	0.4113	2	2	35	34	0.98	1	1	141	214	134	114	C
comp190_c0	984	C	S	502	360	0.4176	2	2	36	36	0.98	1	1	281	221	191	169	G
comp1915_c0	582	A	R	95	43	0.3116	2	2	36	36	0.98	1	1	52	43	20	23	G
comp1917_c0	45	T	K	84	67	0.4437	2	2	37	36	0.98	1	1	30	54	29	38	G
comp1917_c0	75	T	Y	91	110	0.5473	2	2	39	38	0.98	1	1	51	40	41	69	C
comp1930_c0	1379	A	M	44	36	0.45	2	2	38	39	0.98	1	1	19	25	10	26	C
comp1937_c0	157	T	C	2	16	0.8889	2	2	40	39	0.98	1	1	1	1	9	7	C
comp1937_c0	175	G	A	3	19	0.8636	2	2	39	37	0.98	1	1	2	1	5	14	A
comp1937_c0	974	C	Y	5	7	0.5833	2	2	38	34	0.98	1	1	3	2	3	4	T
comp1945_c0	2998	G	R	17	10	0.3704	2	2	36	40	0.98	1	1	11	6	5	5	A
comp1945_c0	3094	T	Y	10	11	0.5238	2	2	38	34	0.98	1	1	5	5	10	1	C
comp1945_c0	3674	T	Y	4	8	0.6667	1	2	36	36	0.98	1	1	0	4	2	6	C
comp1945_c0	3683	A	M	4	8	0.6667	1	2	36	36	0.98	1	1	0	4	2	6	C
comp1949_c0	147	T	Y	32	28	0.4667	2	2	35	34	0.98	1	1	18	14	22	6	C
comp1949_c0	195	G	S	38	21	0.3559	2	2	33	35	0.98	1	1	23	15	17	4	C
comp1949_c0	250	T	Y	46	23	0.3333	2	2	36	35	0.98	1	1	20	26	9	14	C
comp194_c0	287	T	G	7	34	0.8293	1	2	38	37	0.98	1	1	7	0	17	17	G
comp194_c0	310	G	R	15	19	0.5588	1	2	36	37	0.98	1	1	15	0	3	16	A
comp194_c0	321	C	Y	15	17	0.5312	1	2	39	37	0.98	1	1	15	0	3	14	T
comp194_c0	328	T	Y	17	15	0.4688	1	2	38	37	0.98	1	1	17	0	3	12	C
comp1957_c1	113	C	Y	21	12	0.3636	2	2	35	38	0.98	1	1	3	18	11	1	T
comp1959_c0	356	C	S	63	59	0.4836	2	2	38	38	0.98	1	1	39	24	26	33	G
comp1959_c0	1488	A	R	7	10	0.5882	1	2	39	38	0.98	1	1	0	7	2	8	G
comp195_c0	824	G	C	0	25	1	0	2	0	37	0.98	0	1	0	0	2	23	C
comp1967_c0	1061	C	M	19	11	0.3667	2	2	37	35	0.98	1	1	3	16	9	2	A
comp1970_c0	2953	T	Y	4	4	0.5	2	2	41	37	0.98	1	1	2	2	2	2	C
comp1972_c0	616	G	A	8	123	0.9389	2	2	36	36	0.98	1	1	7	1	71	52	A
comp1972_c0	637	A	C	8	90	0.9184	2	2	40	37	0.98	1	1	7	1	41	49	C
comp1972_c0	652	G	A	8	68	0.8947	2	2	39	37	0.98	1	1	7	1	20	48	A
comp1972_c0	670	A	C	8	45	0.8491	2	2	36	37	0.98	1	1	7	1	3	42	C
comp1972_c0	671	C	T	8	45	0.8491	2	2	38	36	0.98	1	1	7	1	3	42	T
comp1974_c0	2399	C	M	14	9	0.3913	2	2	34	38	0.98	1	1	5	9	2	7	A
comp1974_c0	2401	G	R	10	7	0.4118	2	2	34	36	0.98	1	1	3	7	2	5	A
comp1982_c0	400	C	M	57	38	0.4	2	2	35	34	0.98	1	1	32	25	29	9	A
comp198_c0	686	C	Y	14	6	0.3	2	2	36	34	0.98	1	1	9	5	3	3	T
comp1993_c0	975	G	R	148	83	0.3593	2	2	36	35	0.98	1	1	85	63	38	45	A
comp1993_c0	1830	C	Y	88	63	0.4172	2	2	36	36	0.98	1	1	52	36	35	28	T
comp1993_c0	2658	G	R	78	39	0.3333	2	2	36	32	0.98	1	1	51	27	23	16	A
comp1993_c0	2916	G	R	55	42	0.433	2	2	35	36	0.98	1	1	8	47	5	37	A
comp19_c0	51	C	Y	351	152	0.3022	2	2	36	35	0.98	1	1	350	1	147	5	T
comp19_c0	62	T	Y	506	233	0.3153	2	2	39	39	0.98	1	1	505	1	227	6	C
comp19_c0	166	A	M	1138	675	0.3723	2	2	37	37	0.98	1	1	640	498	456	219	C
comp19_c0	183	C	Y	1234	821	0.3995	2	2	38	36	0.98	1	1	720	514	601	220	T
comp19_c0	188	A	R	1240	817	0.3972	2	2	38	38	0.98	1	1	711	529	602	215	G
comp19_c0	207	A	M	1521	1020	0.4014	2	2	38	38	0.98	1	1	964	557	854	166	C
comp19_c0	211	A	R	1534	858	0.3587	2	2	36	38	0.98	1	1	968	566	716	142	G
comp19_c0	212	C	Y	1562	875	0.359	2	2	37	38	0.98	1	1	982	580	714	161	T
comp19_c0	216	G	S	1571	1029	0.3958	2	2	37	38	0.98	1	1	988	583	840	189	C
comp19_c0	223	C	M	1557	1144	0.4235	2	2	36	37	0.98	1	1	987	570	813	331	A
comp19_c0	234	G	R	1484	1080	0.4212	2	2	35	35	0.98	1	1	894	590	680	400	A
comp19_c0	236	T	Y	1433	1130	0.4409	2	2	35	36	0.98	1	1	814	619	698	432	C
comp19_c0	268	C	M	1292	1161	0.4733	2	2	36	37	0.98	1	1	632	660	546	615	A
comp19_c0	291	C	Y	1777	1091	0.3804	2	2	36	36	0.98	1	1	878	899	454	637	T
comp19_c0	667	T	Y	32	29	0.4754	2	2	37	37	0.98	1	1	5	27	27	2	C
comp1_c0	2879	T	Y	11356	7992	0.4131	2	2	37	37	0.98	1	1	6060	5296	4289	3703	C
comp200_c0	933	G	R	12	19	0.6129	1	2	40	38	0.98	1	1	12	0	17	2	A
comp200_c0	935	C	Y	12	19	0.6129	1	2	40	37	0.98	1	1	12	0	17	2	T
comp200_c0	950	C	T	11	36	0.766	1	2	34	34	0.98	1	1	11	0	32	4	T
comp200_c0	1064	G	S	54	25	0.3165	2	2	36	36	0.98	1	1	21	33	13	12	C
comp200_c0	1068	A	M	51	26	0.3377	2	2	37	37	0.98	1	1	21	30	14	12	C
comp200_c0	1079	A	R	51	22	0.3014	2	2	36	36	0.98	1	1	20	31	17	5	G
comp200_c0	1080	G	R	51	22	0.3014	2	2	36	35	0.98	1	1	20	31	17	5	A
comp200_c0	1094	T	Y	49	36	0.4235	2	2	37	36	0.98	1	1	19	30	30	6	C
comp200_c0	1100	G	K	47	44	0.4835	2	2	37	33	0.98	1	1	18	29	38	6	T
comp200_c0	1106	A	R	47	45	0.4891	2	2	36	37	0.98	1	1	17	30	37	8	G
comp200_c0	1111	A	R	46	46	0.5	2	2	35	36	0.98	1	1	14	32	36	10	G
comp200_c0	1139	C	Y	48	21	0.3043	2	2	37	37	0.98	1	1	35	13	3	18	T
comp200_c0	2081	C	Y	91	39	0.3	2	2	39	37	0.98	1	1	45	46	37	2	T
comp200_c0	2090	T	Y	90	39	0.3023	2	2	38	38	0.98	1	1	45	45	33	6	C
comp200_c0	2096	T	Y	76	46	0.377	2	2	35	37	0.98	1	1	45	31	28	18	C
comp200_c0	2105	G	R	69	45	0.3947	2	2	38	37	0.98	1	1	43	26	27	18	A
comp200_c0	2108	A	R	69	46	0.4	2	2	37	35	0.98	1	1	43	26	28	18	G
comp200_c0	2135	T	W	58	40	0.4082	2	2	35	36	0.98	1	1	22	36	25	15	A
comp200_c0	2144	T	Y	61	29	0.3222	2	2	38	37	0.98	1	1	23	38	16	13	C
comp203_c0	82	A	R	160	167	0.5107	2	2	36	36	0.98	1	1	159	1	162	5	G
comp203_c0	220	A	R	908	881	0.4925	2	2	37	37	0.98	1	1	417	491	372	509	G
comp203_c0	444	C	Y	191	185	0.492	2	2	38	37	0.98	1	1	18	173	33	152	T
comp204_c0	2778	T	A	33	335	0.9103	2	2	34	34	0.98	1	1	29	4	317	18	A
comp207_c0	17	T	Y	5	8	0.6154	1	2	30	37	0.98	1	1	5	0	6	2	C
comp207_c0	19	G	S	6	7	0.5385	1	2	25	38	0.98	1	1	6	0	6	1	C
comp208_c0	9	A	M	4	6	0.6	2	2	34	34	0.98	1	1	1	3	1	5	C
comp210_c0	2183	T	C	9	47	0.8393	2	2	34	38	0.98	1	1	2	7	14	33	C
comp227_c0	1261	G	R	70	121	0.6335	2	2	37	35	0.98	1	1	20	50	105	16	A
comp227_c0	1264	T	K	70	119	0.6296	2	2	37	34	0.98	1	1	20	50	103	16	G
comp227_c0	1619	T	K	86	83	0.4911	2	2	35	34	0.98	1	1	45	41	25	58	G
comp227_c0	1620	C	Y	85	83	0.494	2	2	36	32	0.98	1	1	44	41	25	58	T
comp227_c0	1624	C	S	84	93	0.5254	2	2	36	34	0.98	1	1	42	42	33	60	G
comp227_c0	1640	A	R	63	131	0.6753	2	2	34	35	0.98	1	1	38	25	49	82	G
comp230_c0	192	G	T	1	244	0.9959	1	2	33	33	0.98	1	1	0	1	138	106	T
comp230_c0	959	A	M	309	134	0.3025	2	2	36	39	0.98	1	1	54	255	3	131	C
comp230_c0	963	G	R	302	135	0.3089	2	2	36	39	0.98	1	1	49	253	3	132	A
comp230_c2	619	T	Y	116	52	0.3095	2	2	36	36	0.98	1	1	42	74	20	32	C
comp232_c0	829	A	W	299	147	0.3296	2	2	38	37	0.98	1	1	89	210	125	22	T
comp232_c0	832	T	K	299	216	0.4194	2	2	38	36	0.98	1	1	80	219	125	91	G
comp232_c0	833	G	S	298	228	0.4335	2	2	37	36	0.98	1	1	80	218	125	103	C
comp232_c0	835	T	Y	298	233	0.4388	2	2	37	36	0.98	1	1	78	220	126	107	C
comp232_c0	836	A	R	297	241	0.448	2	2	37	37	0.98	1	1	79	218	134	107	G
comp235_c0	1451	T	Y	7	6	0.4615	2	2	38	36	0.98	1	1	5	2	5	1	C
comp235_c0	1463	T	Y	12	8	0.4	2	2	33	35	0.98	1	1	7	5	7	1	C
comp235_c0	1484	C	Y	9	19	0.6786	2	2	34	38	0.98	1	1	6	3	12	7	T
comp235_c0	1544	A	R	7	18	0.72	2	2	40	39	0.98	1	1	4	3	10	8	G
comp235_c0	1549	C	M	20	10	0.3333	2	2	38	39	0.98	1	1	15	5	5	5	A
comp236_c0	479	T	K	193	138	0.4169	2	2	35	38	0.98	1	1	40	153	133	5	G
comp236_c0	481	C	Y	187	150	0.4451	2	2	36	38	0.98	1	1	40	147	133	17	T
comp236_c0	496	C	Y	123	280	0.6948	2	2	38	38	0.98	1	1	7	116	208	72	T
comp236_c0	508	G	T	70	382	0.8451	2	2	39	34	0.98	1	1	2	68	288	94	T
comp236_c0	511	T	C	69	428	0.8612	2	2	39	37	0.98	1	1	2	67	331	97	C
comp238_c0	308	T	C	9	650	0.9863	2	2	37	38	0.98	1	1	8	1	322	328	C
comp241_c0	27	A	W	160	134	0.4558	2	2	37	37	0.98	1	1	147	13	127	7	T
comp244_c1	42	T	W	240	141	0.3701	2	2	34	34	0.98	1	1	18	222	19	122	A
comp244_c1	47	C	Y	253	154	0.3784	2	2	34	33	0.98	1	1	18	235	23	131	T
comp244_c1	82	T	K	314	220	0.412	2	2	38	38	0.98	1	1	50	264	57	163	G
comp244_c1	115	A	M	228	226	0.4978	2	2	37	37	0.98	1	1	46	182	86	140	C
comp244_c1	172	C	Y	62	184	0.748	2	2	36	36	0.98	1	1	1	61	142	42	T
comp244_c1	175	T	Y	62	185	0.749	2	2	36	37	0.98	1	1	1	61	139	46	C
comp244_c1	193	C	G	48	182	0.7913	1	2	34	36	0.98	1	1	0	48	144	38	G
comp244_c1	211	A	C	46	256	0.8477	1	2	37	36	0.98	1	1	0	46	192	64	C
comp244_c1	214	G	T	46	263	0.8511	1	2	37	36	0.98	1	1	0	46	197	66	T
comp247_c0	45	T	Y	13	6	0.3158	1	2	39	39	0.98	1	1	13	0	1	5	C
comp250_c0	484	T	Y	298	134	0.3102	2	2	37	36	0.98	1	1	85	213	126	8	C
comp250_c0	518	G	R	155	181	0.5387	2	2	36	36	0.98	1	1	72	83	160	21	A
comp250_c0	540	G	C	0	353	1	0	2	0	34	0.98	0	1	0	0	277	76	C
comp253_c0	293	C	Y	230	208	0.4749	2	2	38	38	0.98	1	1	186	44	183	25	T
comp253_c0	367	T	W	337	321	0.4878	2	2	36	35	0.98	1	1	207	130	204	117	A
comp253_c0	1418	C	S	475	387	0.449	2	2	37	37	0.98	1	1	291	184	252	135	G
comp253_c0	1560	A	R	297	240	0.4469	2	2	37	37	0.98	1	1	123	174	68	172	G
comp253_c0	1571	C	S	291	220	0.4305	2	2	36	37	0.98	1	1	119	172	64	156	G
comp262_c0	101	C	S	6	4	0.4	1	2	37	33	0.98	1	1	6	0	2	2	G
comp262_c0	109	T	K	6	5	0.4545	2	2	39	35	0.98	1	1	4	2	3	2	G
comp262_c0	275	C	T	30	419	0.9332	2	2	36	37	0.98	1	1	20	10	150	269	T
comp262_c0	276	C	T	33	418	0.9268	2	2	36	37	0.98	1	1	23	10	149	269	T
comp262_c0	291	A	C	35	424	0.9237	2	2	36	38	0.98	1	1	19	16	149	275	C
comp262_c0	305	C	G	48	339	0.876	2	2	37	38	0.98	1	1	29	19	155	184	G
comp262_c0	319	C	T	54	403	0.8818	2	2	37	38	0.98	1	1	29	25	163	240	T
comp262_c0	328	G	C	61	400	0.8677	2	2	37	37	0.98	1	1	32	29	176	224	C
comp262_c0	330	T	C	61	405	0.8691	2	2	36	36	0.98	1	1	32	29	181	224	C
comp262_c0	1394	G	C	1	366	0.9973	1	2	35	35	0.98	1	1	0	1	194	172	C
comp265_c0	1017	C	A	6	57	0.9048	1	2	39	35	0.98	1	1	6	0	28	29	A
comp265_c0	1020	C	A	6	44	0.88	1	2	39	35	0.98	1	1	6	0	25	19	A
comp265_c0	1022	C	G	6	38	0.8636	1	2	39	35	0.98	1	1	6	0	25	13	G
comp265_c0	1023	C	T	6	36	0.8571	1	2	40	31	0.98	1	1	6	0	23	13	T
comp265_c0	1043	G	K	6	12	0.6667	1	2	33	34	0.98	1	1	6	0	9	3	T
comp266_c1	414	C	Y	75	64	0.4604	2	2	38	37	0.98	1	1	3	72	58	6	T
comp266_c1	420	T	K	69	67	0.4926	2	2	38	37	0.98	1	1	2	67	55	12	G
comp266_c1	426	G	R	60	71	0.542	2	2	37	37	0.98	1	1	2	58	59	12	A
comp266_c1	432	A	R	55	76	0.5802	2	2	37	37	0.98	1	1	2	53	64	12	G
comp266_c1	435	T	W	42	88	0.6769	2	2	36	36	0.98	1	1	2	40	71	17	A
comp266_c1	443	A	T	31	98	0.7597	2	2	38	37	0.98	1	1	2	29	85	13	T
comp267_c0	378	T	W	71	65	0.4779	2	2	38	37	0.98	1	1	6	65	64	1	A
comp267_c0	420	G	A	40	173	0.8122	2	2	39	39	0.98	1	1	1	39	172	1	A
comp267_c0	422	A	G	40	173	0.8122	2	2	38	39	0.98	1	1	1	39	172	1	G
comp267_c0	428	C	G	38	224	0.855	2	2	36	38	0.98	1	1	1	37	223	1	G
comp267_c0	432	C	A	29	227	0.8867	2	2	37	37	0.98	1	1	1	28	223	4	A
comp270_c0	274	C	S	595	456	0.4339	2	2	39	38	0.98	1	1	269	326	232	224	G
comp270_c0	286	G	R	616	478	0.4369	2	2	37	36	0.98	1	1	294	322	213	265	A
comp270_c0	328	C	Y	767	541	0.4136	2	2	36	36	0.98	1	1	391	376	264	277	T
comp270_c0	547	T	Y	251	108	0.3008	2	2	35	33	0.98	1	1	144	107	49	59	C
comp270_c0	551	A	R	236	131	0.3569	2	2	35	35	0.98	1	1	130	106	64	67	G
comp270_c0	575	A	R	293	184	0.3857	2	2	36	35	0.98	1	1	201	92	108	76	G
comp270_c0	607	A	R	291	165	0.3618	2	2	35	36	0.98	1	1	195	96	88	77	G
comp270_c0	611	G	S	291	165	0.3618	2	2	35	35	0.98	1	1	199	92	87	78	C
comp270_c0	623	T	Y	294	134	0.3131	2	2	35	35	0.98	1	1	199	95	72	62	C
comp270_c0	656	G	S	207	93	0.31	2	2	35	36	0.98	1	1	133	74	57	36	C
comp272_c0	265	A	W	25	62	0.7126	2	2	38	37	0.98	1	1	2	23	55	7	T
comp272_c0	323	C	G	15	189	0.9265	1	2	39	38	0.98	1	1	0	15	159	30	G
comp275_c0	1080	G	R	29	46	0.6133	2	2	37	34	0.98	1	1	2	27	23	23	A
comp276_c0	726	C	Y	17	16	0.4848	2	2	38	38	0.98	1	1	1	16	1	15	T
comp278_c0	494	C	Y	94	138	0.5948	1	2	38	35	0.98	1	1	94	0	36	102	T
comp278_c0	502	G	K	115	126	0.5228	1	2	37	35	0.98	1	1	115	0	31	95	T
comp278_c0	529	A	R	133	78	0.3697	2	2	37	36	0.98	1	1	130	3	8	70	G
comp278_c0	530	G	R	133	73	0.3544	2	2	37	36	0.98	1	1	130	3	7	66	A
comp278_c0	537	C	Y	140	76	0.3519	2	2	34	35	0.98	1	1	132	8	6	70	T
comp279_c0	563	G	K	341	297	0.4655	2	2	35	35	0.98	1	1	179	162	152	145	T
comp280_c0	2082	G	K	19	19	0.5	2	2	33	36	0.98	1	1	11	8	15	4	T
comp280_c0	5126	A	R	105	82	0.4385	2	2	39	38	0.98	1	1	21	84	19	63	G
comp280_c0	5357	A	R	20	15	0.4286	2	2	37	36	0.98	1	1	9	11	6	9	G
comp281_c0	52	T	K	43	79	0.6475	2	2	36	34	0.98	1	1	42	1	10	69	G
comp281_c0	53	T	W	41	71	0.6339	1	2	37	34	0.98	1	1	41	0	1	70	A
comp281_c0	54	T	K	43	93	0.6838	2	2	38	35	0.98	1	1	42	1	14	79	G
comp288_c0	101	T	C	2	6	0.75	2	2	38	32	0.98	1	1	1	1	1	5	C
comp288_c0	104	T	C	2	8	0.8	2	2	37	34	0.98	1	1	1	1	3	5	C
comp289_c0	951	A	R	14	30	0.6818	1	2	39	35	0.98	1	1	14	0	22	8	G
comp289_c0	952	T	Y	14	27	0.6585	1	2	40	35	0.98	1	1	14	0	22	5	C
comp289_c0	954	A	R	14	22	0.6111	1	2	40	35	0.98	1	1	14	0	17	5	G
comp289_c0	963	C	M	24	15	0.3846	1	2	38	35	0.98	1	1	24	0	10	5	A
comp28_c0	122	A	R	2974	1734	0.3683	2	2	36	35	0.98	1	1	977	1997	619	1115	G
comp28_c0	148	T	Y	2219	1398	0.3865	2	2	35	35	0.98	1	1	756	1463	604	794	C
comp28_c0	154	T	Y	2313	1114	0.3251	2	2	36	36	0.98	1	1	829	1484	537	577	C
comp28_c0	155	G	R	2337	1062	0.3124	2	2	37	35	0.98	1	1	841	1496	497	565	A
comp28_c0	156	G	R	2335	1032	0.3065	2	2	37	35	0.98	1	1	843	1492	466	566	A
comp290_c0	223	C	M	97	226	0.6997	2	2	39	36	0.98	1	1	6	91	217	9	A
comp290_c0	247	A	G	67	451	0.8707	2	2	39	38	0.98	1	1	1	66	400	51	G
comp290_c0	265	C	T	55	585	0.9141	2	2	36	37	0.98	1	1	1	54	412	173	T
comp290_c0	275	T	C	30	606	0.9528	2	2	37	37	0.98	1	1	1	29	415	191	C
comp290_c0	280	G	C	23	620	0.9642	2	2	34	37	0.98	1	1	1	22	413	207	C
comp293_c0	899	T	Y	24	15	0.3846	2	2	35	34	0.98	1	1	5	19	2	13	C
comp297_c0	25	T	A	2	133	0.9852	1	2	39	36	0.98	1	1	2	0	74	59	A
comp29_c2	470	G	A	6	35	0.8537	1	2	36	34	0.98	1	1	6	0	12	23	A
comp29_c2	479	C	G	7	37	0.8409	1	2	35	35	0.98	1	1	7	0	16	21	G
comp29_c2	494	C	G	7	35	0.8333	1	2	32	35	0.98	1	1	7	0	14	21	G
comp29_c2	506	C	G	7	27	0.7941	1	2	33	35	0.98	1	1	7	0	13	14	G
comp2_c0	3016	C	Y	362	247	0.4056	2	2	37	34	0.98	1	1	37	325	85	162	T
comp2_c0	3023	G	T	230	1229	0.8424	2	2	36	33	0.98	1	1	16	214	321	908	T
comp2_c0	10765	C	Y	390	196	0.3345	2	2	38	37	0.98	1	1	160	230	94	102	T
comp2_c0	11982	T	Y	245	179	0.4222	2	2	38	37	0.98	1	1	57	188	70	109	C
comp2_c0	12742	T	Y	279	153	0.3542	2	2	37	37	0.98	1	1	129	150	91	62	C
comp2_c0	13099	C	Y	253	193	0.4327	2	2	37	37	0.98	1	1	120	133	94	99	T
comp303_c0	368	C	Y	211	190	0.4738	2	2	36	37	0.98	1	1	105	106	93	97	T
comp303_c0	410	T	Y	204	267	0.5669	2	2	36	37	0.98	1	1	112	92	141	126	C
comp303_c0	494	C	Y	291	180	0.3822	2	2	36	35	0.98	1	1	143	148	117	63	T
comp303_c0	503	C	Y	276	198	0.4177	2	2	36	37	0.98	1	1	131	145	126	72	T
comp303_c0	524	C	Y	243	182	0.4282	2	2	38	37	0.98	1	1	106	137	117	65	T
comp303_c0	536	T	Y	268	207	0.4358	2	2	36	37	0.98	1	1	122	146	134	73	C
comp303_c0	566	T	Y	281	227	0.4469	2	2	37	36	0.98	1	1	122	159	123	104	C
comp303_c0	584	A	R	244	222	0.4764	2	2	37	38	0.98	1	1	116	128	116	106	G
comp303_c0	659	A	R	254	224	0.4686	2	2	38	37	0.98	1	1	126	128	96	128	G
comp303_c0	701	C	Y	259	170	0.3963	2	2	37	38	0.98	1	1	106	153	33	137	T
comp303_c0	729	T	Y	214	147	0.4072	2	2	37	38	0.98	1	1	111	103	33	114	C
comp303_c0	883	A	W	36	24	0.4	2	2	36	38	0.98	1	1	6	30	7	17	T
comp303_c0	891	A	R	17	20	0.5405	2	2	38	39	0.98	1	1	3	14	7	13	G
comp304_c0	3432	C	G	0	8	1	0	2	0	34	0.98	0	1	0	0	7	1	G
comp314_c1	1348	T	G	1	8	0.8889	1	2	34	32	0.98	1	1	1	0	3	5	G
comp319_c2	380	A	R	10	22	0.6875	2	2	36	37	0.98	1	1	2	8	21	1	G
comp327_c0	299	G	R	164	118	0.4184	2	2	38	38	0.98	1	1	12	152	112	6	A
comp327_c0	317	A	W	123	166	0.5744	2	2	38	36	0.98	1	1	7	116	106	60	T
comp327_c0	323	C	Y	121	197	0.6195	2	2	37	35	0.98	1	1	5	116	126	71	T
comp327_c0	335	C	T	64	222	0.7762	2	2	38	36	0.98	1	1	3	61	128	94	T
comp328_c0	493	G	K	29	28	0.4912	2	2	39	37	0.98	1	1	1	28	9	19	T
comp328_c0	511	A	R	20	36	0.6429	1	2	40	38	0.98	1	1	0	20	17	19	G
comp329_c0	186	C	S	266	136	0.3383	2	2	34	34	0.98	1	1	76	190	81	55	G
comp329_c0	198	T	W	291	135	0.3169	2	2	36	34	0.98	1	1	76	215	42	93	A
comp329_c0	210	G	K	286	176	0.381	2	2	36	34	0.98	1	1	52	234	56	120	T
comp329_c0	230	G	R	269	203	0.4301	2	2	37	36	0.98	1	1	54	215	69	134	A
comp331_c0	400	T	Y	8	17	0.68	2	2	33	35	0.98	1	1	6	2	5	12	C
comp331_c0	424	T	Y	10	7	0.4118	2	2	31	33	0.98	1	1	2	8	4	3	C
comp338_c0	97	C	M	242	151	0.3842	2	2	39	38	0.98	1	1	238	4	147	4	A
comp338_c0	178	C	S	236	179	0.4313	2	2	33	34	0.98	1	1	29	207	1	178	G
comp343_c0	388	G	S	348	184	0.3459	2	2	35	34	0.98	1	1	130	218	40	144	C
comp348_c0	482	G	A	51	166	0.765	2	2	38	38	0.98	1	1	50	1	47	119	A
comp348_c0	509	G	K	90	164	0.6457	2	2	39	38	0.98	1	1	86	4	36	128	T
comp348_c0	524	G	R	142	121	0.4601	2	2	38	36	0.98	1	1	137	5	27	94	A
comp348_c0	527	A	R	144	116	0.4462	2	2	37	37	0.98	1	1	137	7	27	89	G
comp348_c0	534	C	Y	161	87	0.3508	2	2	38	38	0.98	1	1	145	16	2	85	T
comp348_c0	1376	A	R	56	28	0.3333	2	2	30	36	0.98	1	1	14	42	9	19	G
comp348_c0	1409	C	S	34	19	0.3585	2	2	37	36	0.98	1	1	10	24	5	14	G
comp348_c0	1436	T	K	13	12	0.48	2	2	37	36	0.98	1	1	2	11	5	7	G
comp348_c0	1445	G	S	12	11	0.4783	1	2	36	34	0.98	1	1	0	12	5	6	C
comp348_c0	1457	T	K	9	4	0.3077	1	2	37	31	0.98	1	1	0	9	3	1	G
comp348_c0	1460	G	S	9	4	0.3077	1	2	36	34	0.98	1	1	0	9	3	1	C
comp34_c0	2190	C	T	11	44	0.8	2	2	35	36	0.98	1	1	4	7	8	36	T
comp34_c0	2195	T	G	5	41	0.8913	2	2	35	36	0.98	1	1	1	4	5	36	G
comp34_c0	2196	T	A	5	35	0.875	2	2	35	34	0.98	1	1	1	4	4	31	A
comp353_c0	589	T	W	57	27	0.3214	2	2	36	38	0.98	1	1	10	47	3	24	A
comp353_c0	654	C	M	16	13	0.4483	2	2	38	39	0.98	1	1	3	13	1	12	A
comp357_c0	712	C	Y	350	187	0.3482	2	2	37	37	0.98	1	1	80	270	158	29	T
comp357_c0	718	T	K	335	222	0.3986	2	2	37	38	0.98	1	1	75	260	181	41	G
comp357_c0	723	G	R	330	247	0.4281	2	2	37	37	0.98	1	1	36	294	187	60	A
comp357_c0	748	T	K	418	216	0.3407	2	2	37	38	0.98	1	1	296	122	4	212	G
comp357_c0	750	C	Y	436	199	0.3134	2	2	37	38	0.98	1	1	306	130	4	195	T
comp357_c0	985	A	G	0	220	1	0	2	0	36	0.98	0	1	0	0	58	162	G
comp363_c0	48	G	T	30	155	0.8378	2	2	36	35	0.98	1	1	16	14	76	79	T
comp363_c0	49	T	C	30	155	0.8378	2	2	34	36	0.98	1	1	16	14	76	79	C
comp363_c0	164	T	Y	97	48	0.331	2	2	36	35	0.98	1	1	1	96	25	23	C
comp36_c2	225	C	Y	227	104	0.3142	2	2	38	34	0.98	1	1	217	10	95	9	T
comp377_c0	2472	T	Y	115	70	0.3784	2	2	35	36	0.98	1	1	85	30	25	45	C
comp37_c0	9	A	R	136	132	0.4925	2	2	34	31	0.98	1	1	38	98	1	131	G
comp385_c0	890	T	Y	210	115	0.3538	2	2	37	36	0.98	1	1	98	112	46	69	C
comp390_c0	1852	A	W	18	8	0.3077	2	2	39	38	0.98	1	1	6	12	4	4	T
comp390_c0	3345	T	W	9	10	0.5263	1	2	39	39	0.98	1	1	0	9	6	4	A
comp390_c0	3351	G	K	7	11	0.6111	1	2	39	39	0.98	1	1	0	7	6	5	T
comp390_c0	3373	C	Y	8	9	0.5294	1	2	40	40	0.98	1	1	0	8	6	3	T
comp390_c0	3376	A	R	9	9	0.5	1	2	37	40	0.98	1	1	0	9	6	3	G
comp390_c0	3660	C	M	14	8	0.3636	2	2	37	37	0.98	1	1	6	8	3	5	A
comp390_c0	4428	C	Y	6	7	0.5385	2	2	39	38	0.98	1	1	5	1	4	3	T
comp390_c0	4516	A	M	4	6	0.6	2	2	39	34	0.98	1	1	1	3	2	4	C
comp391_c0	1616	A	W	20	23	0.5349	1	2	37	36	0.98	1	1	0	20	3	20	T
comp391_c0	2262	C	S	26	42	0.6176	1	2	39	38	0.98	1	1	26	0	16	26	G
comp396_c0	200	C	M	457	234	0.3386	2	2	39	38	0.98	1	1	448	9	231	3	A
comp396_c0	205	C	Y	466	238	0.3381	2	2	39	39	0.98	1	1	455	11	234	4	T
comp396_c0	379	A	W	62	37	0.3737	2	2	33	31	0.98	1	1	14	48	12	25	T
comp39_c0	671	G	K	635	378	0.3731	2	2	37	37	0.98	1	1	48	587	40	338	T
comp39_c0	672	A	W	626	379	0.3771	2	2	37	37	0.98	1	1	48	578	40	339	T
comp3_c0	19	G	K	257	162	0.3866	2	2	37	35	0.98	1	1	253	4	161	1	T
comp3_c0	242	G	R	31666	14174	0.3092	2	2	35	34	0.98	1	1	13015	18651	3153	11021	A
comp405_c0	38	T	C	7	72	0.9114	2	2	37	35	0.98	1	1	6	1	41	31	C
comp405_c0	45	T	C	7	86	0.9247	2	2	36	34	0.98	1	1	6	1	43	43	C
comp411_c0	1017	C	Y	31	65	0.6771	2	2	36	32	0.98	1	1	30	1	32	33	T
comp411_c0	1018	A	R	31	67	0.6837	2	2	37	33	0.98	1	1	30	1	34	33	G
comp411_c0	1033	A	M	41	54	0.5684	2	2	39	35	0.98	1	1	38	3	24	30	C
comp411_c0	1036	C	M	43	43	0.5	2	2	38	36	0.98	1	1	39	4	13	30	A
comp411_c0	1038	G	S	43	42	0.4941	2	2	38	36	0.98	1	1	39	4	12	30	C
comp415_c0	2845	T	Y	58	37	0.3895	2	2	35	39	0.98	1	1	30	28	2	35	C
comp41_c0	183	C	T	2	7	0.7778	1	2	32	35	0.98	1	1	0	2	4	3	T
comp41_c0	196	A	G	2	6	0.75	1	2	34	35	0.98	1	1	0	2	4	2	G
comp41_c0	254	G	R	3	6	0.6667	2	2	38	36	0.98	1	1	2	1	2	4	A
comp41_c0	683	A	M	5	10	0.6667	2	2	37	39	0.98	1	1	4	1	7	3	C
comp41_c0	746	A	R	16	15	0.4839	2	2	38	39	0.98	1	1	8	8	9	6	G
comp41_c0	782	G	S	23	14	0.3784	2	2	38	36	0.98	1	1	11	12	5	9	C
comp41_c0	799	A	R	18	8	0.3077	2	2	38	40	0.98	1	1	7	11	2	6	G
comp422_c0	230	T	Y	47	29	0.3816	2	2	38	40	0.98	1	1	22	25	24	5	C
comp42_c0	212	C	M	353	725	0.6725	2	2	36	37	0.98	1	1	349	4	139	586	A
comp42_c0	230	A	M	565	624	0.5248	2	2	37	37	0.98	1	1	545	20	69	555	C
comp42_c0	236	G	R	567	547	0.491	2	2	37	36	0.98	1	1	548	19	46	501	A
comp42_c0	248	A	W	650	376	0.3665	2	2	36	38	0.98	1	1	609	41	7	369	T
comp42_c0	252	A	M	682	371	0.3523	2	2	37	37	0.98	1	1	637	45	4	367	C
comp430_c0	1538	G	R	168	80	0.3226	2	2	34	37	0.98	1	1	92	76	64	16	A
comp430_c0	1541	A	R	103	87	0.4579	2	2	37	35	0.98	1	1	65	38	37	50	G
comp430_c0	1544	A	R	109	67	0.3807	2	2	37	36	0.98	1	1	64	45	27	40	G
comp430_c0	1689	T	C	3	17	0.85	1	2	35	36	0.98	1	1	0	3	7	10	C
comp430_c0	1692	C	S	3	6	0.6667	1	2	35	31	0.98	1	1	0	3	4	2	G
comp431_c0	862	G	S	279	125	0.3094	2	2	36	39	0.98	1	1	108	171	120	5	C
comp431_c0	871	A	R	254	142	0.3586	2	2	37	38	0.98	1	1	56	198	129	13	G
comp431_c0	877	A	R	260	146	0.3596	2	2	37	36	0.98	1	1	51	209	127	19	G
comp431_c0	880	A	R	246	153	0.3835	2	2	37	36	0.98	1	1	50	196	127	26	G
comp431_c0	886	G	K	231	156	0.4031	2	2	37	36	0.98	1	1	45	186	124	32	T
comp431_c0	919	G	R	226	150	0.3989	2	2	35	34	0.98	1	1	119	107	29	121	A
comp431_c0	922	T	Y	230	146	0.3883	2	2	35	38	0.98	1	1	121	109	29	117	C
comp431_c0	928	C	Y	240	138	0.3651	2	2	35	38	0.98	1	1	112	128	27	111	T
comp431_c0	937	A	R	241	119	0.3306	2	2	35	37	0.98	1	1	107	134	17	102	G
comp434_c0	80	G	R	28	12	0.3	2	2	38	37	0.98	1	1	15	13	8	4	A
comp434_c0	206	T	K	131	102	0.4378	2	2	37	37	0.98	1	1	82	49	75	27	G
comp434_c0	209	T	Y	128	105	0.4506	2	2	37	38	0.98	1	1	80	48	73	32	C
comp434_c0	210	G	K	115	105	0.4773	2	2	38	37	0.98	1	1	76	39	73	32	T
comp434_c0	247	A	R	102	140	0.5785	2	2	37	38	0.98	1	1	40	62	75	65	G
comp434_c0	347	G	S	130	70	0.35	2	2	37	37	0.98	1	1	51	79	30	40	C
comp434_c0	504	T	K	123	203	0.6227	2	2	38	38	0.98	1	1	58	65	83	120	G
comp434_c0	696	C	S	269	119	0.3067	2	2	38	39	0.98	1	1	212	57	91	28	G
comp434_c0	780	G	R	339	166	0.3287	2	2	36	36	0.98	1	1	112	227	70	96	A
comp434_c0	781	G	R	200	338	0.6283	2	2	36	36	0.98	1	1	61	139	121	217	A
comp434_c0	818	A	W	234	103	0.3056	2	2	38	37	0.98	1	1	18	216	12	91	T
comp434_c0	823	A	R	211	116	0.3547	2	2	37	38	0.98	1	1	11	200	10	106	G
comp438_c0	37	G	S	74	62	0.4559	2	2	37	35	0.98	1	1	65	9	44	18	C
comp438_c0	40	G	S	76	66	0.4648	2	2	37	35	0.98	1	1	67	9	40	26	C
comp438_c0	46	A	M	79	95	0.546	2	2	36	35	0.98	1	1	75	4	62	33	C
comp438_c0	89	T	K	251	113	0.3104	2	2	36	36	0.98	1	1	235	16	66	47	G
comp438_c0	97	C	S	247	113	0.3139	2	2	37	36	0.98	1	1	230	17	66	47	G
comp438_c0	109	C	M	237	107	0.311	2	2	35	32	0.98	1	1	219	18	60	47	A
comp438_c0	154	G	S	144	157	0.5216	2	2	36	33	0.98	1	1	58	86	51	106	C
comp438_c0	160	A	R	169	147	0.4652	2	2	36	34	0.98	1	1	56	113	37	110	G
comp443_c0	2487	G	S	5	11	0.6875	2	2	34	35	0.98	1	1	2	3	6	5	C
comp443_c0	2489	G	S	5	13	0.7222	2	2	34	33	0.98	1	1	2	3	8	5	C
comp443_c0	2542	C	M	17	48	0.7385	2	2	39	37	0.98	1	1	11	6	25	23	A
comp443_c0	2572	G	R	47	27	0.3649	2	2	38	37	0.98	1	1	22	25	13	14	A
comp443_c0	2605	A	R	39	18	0.3158	2	2	36	37	0.98	1	1	19	20	11	7	G
comp443_c0	2650	A	R	13	9	0.4091	2	2	39	36	0.98	1	1	11	2	2	7	G
comp450_c2	2324	G	R	82	77	0.4843	2	2	37	37	0.98	1	1	46	36	43	34	A
comp450_c2	2587	A	G	1	26	0.963	1	2	37	38	0.98	1	1	0	1	16	10	G
comp451_c1	571	T	C	37	158	0.8103	1	2	38	36	0.98	1	1	37	0	26	132	C
comp451_c1	580	T	Y	60	127	0.6791	1	2	37	35	0.98	1	1	60	0	18	109	C
comp451_c1	586	C	S	63	105	0.625	1	2	39	36	0.98	1	1	63	0	10	95	G
comp451_c1	589	T	Y	64	98	0.6049	1	2	39	37	0.98	1	1	64	0	10	88	C
comp453_c0	1833	C	S	24	13	0.3514	2	2	37	37	0.98	1	1	23	1	9	4	G
comp453_c1	921	C	T	36	314	0.8971	2	2	37	36	0.98	1	1	32	4	24	290	T
comp453_c1	945	G	C	74	245	0.768	2	2	35	35	0.98	1	1	61	13	4	241	C
comp453_c1	960	G	S	103	220	0.6811	2	2	36	35	0.98	1	1	77	26	4	216	C
comp453_c1	963	A	R	114	185	0.6187	2	2	34	34	0.98	1	1	89	25	4	181	G
comp453_c1	966	G	S	118	180	0.604	2	2	36	36	0.98	1	1	90	28	4	176	C
comp455_c0	1915	T	W	26	14	0.35	2	2	34	32	0.98	1	1	14	12	2	12	A
comp456_c0	1488	T	A	1	29	0.9667	1	2	39	37	0.98	1	1	0	1	4	25	A
comp458_c0	2301	T	K	4	4	0.5	1	2	36	37	0.98	1	1	0	4	3	1	G
comp459_c0	577	A	R	210	224	0.5161	2	2	36	36	0.98	1	1	101	109	80	144	G
comp460_c0	990	A	G	10	267	0.9639	1	2	35	34	0.98	1	1	10	0	162	105	G
comp460_c0	1008	C	Y	65	172	0.7257	2	2	36	35	0.98	1	1	44	21	96	76	T
comp460_c0	1017	C	S	64	146	0.6952	2	2	34	34	0.98	1	1	43	21	74	72	G
comp460_c0	1020	C	S	64	138	0.6832	2	2	36	34	0.98	1	1	44	20	57	81	G
comp460_c0	1035	C	S	49	144	0.7461	2	2	35	34	0.98	1	1	37	12	5	139	G
comp460_c0	1071	A	M	31	17	0.3542	2	2	34	34	0.98	1	1	30	1	7	10	C
comp460_c0	1092	C	G	21	155	0.8807	2	2	32	36	0.98	1	1	20	1	4	151	G
comp465_c0	496	A	R	159	100	0.3861	2	2	37	36	0.98	1	1	76	83	29	71	G
comp465_c0	504	T	K	145	110	0.4314	2	2	38	37	0.98	1	1	70	75	29	81	G
comp465_c0	505	A	R	140	109	0.4378	2	2	38	37	0.98	1	1	65	75	27	82	G
comp465_c0	514	T	Y	123	116	0.4854	2	2	37	37	0.98	1	1	57	66	29	87	C
comp465_c0	544	G	K	140	81	0.3665	2	2	36	37	0.98	1	1	36	104	55	26	T
comp465_c0	547	G	K	122	63	0.3405	2	2	35	34	0.98	1	1	36	86	56	7	T
comp465_c0	582	G	K	117	70	0.3743	2	2	35	35	0.98	1	1	21	96	69	1	T
comp465_c0	586	G	R	116	135	0.5378	2	2	35	36	0.98	1	1	20	96	134	1	A
comp465_c0	622	C	S	117	230	0.6628	2	2	36	37	0.98	1	1	16	101	180	50	G
comp465_c0	643	G	K	86	255	0.7478	2	2	35	35	0.98	1	1	1	85	184	71	T
comp465_c0	646	G	R	85	248	0.7447	2	2	35	33	0.98	1	1	1	84	179	69	A
comp465_c0	655	C	A	65	275	0.8088	2	2	37	34	0.98	1	1	1	64	190	85	A
comp465_c0	663	T	C	56	290	0.8382	1	2	37	35	0.98	1	1	0	56	180	110	C
comp468_c0	2322	T	Y	21	12	0.3636	2	2	36	33	0.98	1	1	14	7	5	7	C
comp46_c0	907	C	A	4	16	0.8	1	2	39	30	0.98	1	1	4	0	2	14	A
comp46_c0	908	T	C	4	16	0.8	1	2	40	34	0.98	1	1	4	0	2	14	C
comp46_c0	915	C	Y	4	9	0.6923	1	2	41	36	0.98	1	1	4	0	1	8	T
comp476_c0	1322	C	Y	12	8	0.4	2	2	38	36	0.98	1	1	4	8	4	4	T
comp477_c0	714	C	Y	107	49	0.3141	2	2	36	36	0.98	1	1	42	65	25	24	T
comp477_c0	840	T	K	111	63	0.3621	2	2	35	36	0.98	1	1	64	47	33	30	G
comp477_c0	861	C	Y	112	57	0.3373	2	2	35	36	0.98	1	1	46	66	26	31	T
comp477_c0	935	G	R	109	63	0.3663	2	2	37	36	0.98	1	1	49	60	32	31	A
comp477_c0	1050	C	Y	127	56	0.306	2	2	37	36	0.98	1	1	70	57	26	30	T
comp477_c0	1138	G	S	105	72	0.4068	2	2	36	36	0.98	1	1	33	72	39	33	C
comp477_c0	1159	T	W	86	74	0.4625	2	2	37	37	0.98	1	1	19	67	30	44	A
comp477_c0	1183	C	S	56	88	0.6111	2	2	39	37	0.98	1	1	13	43	50	38	G
comp477_c0	1204	C	Y	41	104	0.7172	2	2	37	37	0.98	1	1	12	29	62	42	T
comp477_c0	1277	G	A	4	54	0.931	1	2	35	36	0.98	1	1	0	4	15	39	A
comp477_c0	1290	C	T	3	44	0.9362	1	2	33	36	0.98	1	1	0	3	6	38	T
comp486_c0	204	G	S	381	196	0.3397	2	2	37	37	0.98	1	1	154	227	169	27	C
comp486_c0	243	C	Y	306	295	0.4908	2	2	36	36	0.98	1	1	148	158	260	35	T
comp486_c0	255	C	S	303	340	0.5288	2	2	36	36	0.98	1	1	135	168	233	107	G
comp486_c0	279	C	Y	246	383	0.6089	2	2	34	33	0.98	1	1	110	136	237	146	T
comp486_c0	303	C	Y	215	410	0.656	2	2	34	34	0.98	1	1	92	123	240	170	T
comp486_c0	309	C	S	207	414	0.6667	2	2	35	34	0.98	1	1	87	120	213	201	G
comp486_c0	310	T	W	201	410	0.671	2	2	35	32	0.98	1	1	86	115	209	201	A
comp487_c0	1463	A	R	258	192	0.4267	2	2	35	36	0.98	1	1	207	51	37	155	G
comp487_c0	1466	T	Y	260	178	0.4064	2	2	33	36	0.98	1	1	205	55	34	144	C
comp48_c0	1338	C	S	592	317	0.3487	2	2	37	38	0.98	1	1	362	230	200	117	G
comp48_c0	1341	G	R	599	323	0.3503	2	2	38	38	0.98	1	1	369	230	204	119	A
comp48_c0	1368	C	Y	739	332	0.31	2	2	37	39	0.98	1	1	436	303	214	118	T
comp498_c0	1059	G	C	1	108	0.9908	1	2	40	34	0.98	1	1	1	0	16	92	C
comp498_c0	1060	T	C	1	108	0.9908	1	2	40	34	0.98	1	1	1	0	16	92	C
comp498_c0	1063	T	G	1	98	0.9899	1	2	40	35	0.98	1	1	1	0	7	91	G
comp498_c0	1064	C	G	1	95	0.9896	1	2	41	35	0.98	1	1	1	0	4	91	G
comp498_c0	1073	G	C	1	103	0.9904	1	2	38	33	0.98	1	1	1	0	4	99	C
comp49_c0	227	T	C	163	749	0.8213	2	2	34	36	0.98	1	1	76	87	292	457	C
comp49_c0	523	G	T	262	1021	0.7958	2	2	38	36	0.98	1	1	261	1	598	423	T
comp49_c0	614	A	W	719	748	0.5099	2	2	33	36	0.98	1	1	399	320	205	543	T
comp49_c0	673	C	Y	765	487	0.389	2	2	37	36	0.98	1	1	371	394	201	286	T
comp4_c0	54	C	G	3082	13107	0.8096	2	2	37	38	0.98	1	1	3067	15	13106	1	G
comp4_c0	92	C	T	3678	17785	0.8286	2	2	38	38	0.98	1	1	3387	291	17048	737	T
comp510_c2	169	T	Y	359	285	0.4425	2	2	36	36	0.98	1	1	273	86	245	40	C
comp510_c2	182	C	Y	397	339	0.4606	2	2	36	35	0.98	1	1	285	112	259	80	T
comp510_c2	238	T	Y	503	362	0.4185	2	2	36	36	0.98	1	1	229	274	130	232	C
comp510_c2	251	G	R	487	318	0.395	2	2	37	36	0.98	1	1	214	273	91	227	A
comp510_c2	280	A	R	425	226	0.3472	2	2	36	36	0.98	1	1	197	228	38	188	G
comp510_c2	924	T	Y	197	112	0.3625	2	2	35	35	0.98	1	1	151	46	81	31	C
comp510_c2	937	G	K	195	111	0.3627	2	2	34	35	0.98	1	1	143	52	87	24	T
comp510_c2	1104	T	Y	39	19	0.3276	2	2	36	36	0.98	1	1	1	38	4	15	C
comp514_c0	2589	T	Y	101	112	0.5258	2	2	39	38	0.98	1	1	63	38	84	28	C
comp514_c0	2745	T	Y	291	132	0.3121	2	2	38	38	0.98	1	1	159	132	53	79	C
comp515_c0	183	C	Y	106	131	0.5527	2	2	37	34	0.98	1	1	64	42	128	3	T
comp515_c0	190	T	K	109	85	0.4381	2	2	36	32	0.98	1	1	64	45	84	1	G
comp515_c0	468	A	G	14	83	0.8557	2	2	36	35	0.98	1	1	5	9	77	6	G
comp515_c0	471	C	T	13	87	0.87	2	2	35	27	0.98	1	1	5	8	79	8	T
comp515_c0	477	T	C	7	83	0.9222	2	2	35	34	0.98	1	1	4	3	73	10	C
comp515_c0	480	A	T	7	75	0.9146	2	2	34	33	0.98	1	1	4	3	54	21	T
comp515_c0	481	A	G	7	82	0.9213	2	2	33	34	0.98	1	1	4	3	55	27	G
comp516_c0	45	G	R	255	215	0.4574	2	2	37	36	0.98	1	1	162	93	103	112	A
comp516_c0	69	C	Y	377	258	0.4063	2	2	35	37	0.98	1	1	201	176	132	126	T
comp516_c0	103	G	R	554	351	0.3878	2	2	37	37	0.98	1	1	338	216	207	144	A
comp516_c0	122	T	W	565	359	0.3885	2	2	37	37	0.98	1	1	342	223	210	149	A
comp516_c0	132	C	Y	570	361	0.3878	2	2	38	37	0.98	1	1	335	235	195	166	T
comp516_c0	155	C	Y	622	322	0.3411	2	2	36	37	0.98	1	1	362	260	168	154	T
comp516_c0	159	T	K	627	306	0.328	2	2	36	37	0.98	1	1	356	271	148	158	G
comp517_c0	74	A	R	29	55	0.6548	2	2	35	36	0.98	1	1	26	3	49	6	G
comp517_c0	498	T	Y	67	36	0.3495	2	2	35	34	0.98	1	1	46	21	22	14	C
comp517_c0	604	A	M	62	31	0.3333	2	2	35	35	0.98	1	1	26	36	14	17	C
comp517_c0	870	C	Y	80	41	0.3388	2	2	36	34	0.98	1	1	34	46	19	22	T
comp517_c0	891	A	M	56	31	0.3563	2	2	36	34	0.98	1	1	21	35	14	17	C
comp517_c0	939	T	W	52	39	0.4286	2	2	36	36	0.98	1	1	26	26	15	24	A
comp517_c0	1104	G	S	78	46	0.371	2	2	38	37	0.98	1	1	41	37	22	24	C
comp517_c0	2091	T	K	34	16	0.32	2	2	36	36	0.98	1	1	13	21	4	12	G
comp517_c0	2346	A	M	82	37	0.3109	2	2	38	36	0.98	1	1	8	74	8	29	C
comp518_c0	75	A	M	40	18	0.3103	2	2	38	39	0.98	1	1	28	12	6	12	C
comp518_c0	94	A	R	32	37	0.5362	2	2	37	37	0.98	1	1	16	16	15	22	G
comp518_c0	146	G	R	12	24	0.6667	2	2	36	38	0.98	1	1	1	11	3	21	A
comp518_c0	147	G	K	18	18	0.5	2	2	34	36	0.98	1	1	3	15	1	17	T
comp518_c0	158	G	R	12	24	0.6667	2	2	38	38	0.98	1	1	1	11	2	22	A
comp519_c0	295	C	Y	30	17	0.3617	2	2	36	34	0.98	1	1	21	9	8	9	T
comp522_c0	739	C	M	28	26	0.4815	2	2	34	29	0.98	1	1	1	27	21	5	A
comp525_c0	6321	C	Y	69	64	0.4812	2	2	36	38	0.98	1	1	46	23	43	21	T
comp529_c0	709	T	Y	47	83	0.6385	1	2	39	37	0.98	1	1	47	0	18	65	C
comp529_c0	715	A	M	51	81	0.6136	1	2	39	37	0.98	1	1	51	0	17	64	C
comp529_c0	723	T	Y	53	45	0.4592	1	2	39	38	0.98	1	1	53	0	8	37	C
comp529_c0	724	G	R	53	45	0.4592	1	2	39	38	0.98	1	1	53	0	8	37	A
comp529_c0	725	C	S	58	45	0.4369	2	2	39	38	0.98	1	1	57	1	8	37	G
comp530_c0	186	G	S	9	12	0.5714	2	2	33	35	0.98	1	1	8	1	9	3	C
comp535_c0	1129	T	K	187	86	0.315	2	2	34	37	0.98	1	1	119	68	79	7	G
comp535_c0	1137	C	Y	192	117	0.3786	2	2	36	33	0.98	1	1	124	68	100	17	T
comp535_c0	1156	A	R	170	169	0.4985	2	2	33	33	0.98	1	1	116	54	108	61	G
comp535_c0	1183	C	S	289	137	0.3216	2	2	35	33	0.98	1	1	172	117	90	47	G
comp535_c0	1515	T	W	8	17	0.68	2	2	36	37	0.98	1	1	2	6	16	1	A
comp535_c0	1517	T	C	5	17	0.7727	2	2	39	37	0.98	1	1	2	3	16	1	C
comp535_c0	1969	A	M	26	45	0.6338	2	2	35	37	0.98	1	1	17	9	7	38	C
comp535_c0	1987	A	W	26	40	0.6061	2	2	33	37	0.98	1	1	15	11	7	33	T
comp535_c0	2020	T	Y	25	12	0.3243	2	2	34	34	0.98	1	1	13	12	7	5	C
comp535_c0	2074	C	Y	25	13	0.3421	2	2	36	36	0.98	1	1	18	7	10	3	T
comp535_c0	2094	T	Y	20	11	0.3548	2	2	34	33	0.98	1	1	14	6	10	1	C
comp535_c0	2133	G	S	33	19	0.3654	2	2	36	36	0.98	1	1	17	16	12	7	C
comp535_c0	2148	A	M	35	18	0.3396	2	2	37	34	0.98	1	1	22	13	11	7	C
comp535_c0	2153	A	R	35	17	0.3269	2	2	35	34	0.98	1	1	22	13	10	7	G
comp535_c0	2990	C	Y	12	7	0.3684	2	2	39	39	0.98	1	1	4	8	3	4	T
comp539_c0	807	C	Y	30	13	0.3023	2	2	35	33	0.98	1	1	10	20	9	4	T
comp543_c0	573	C	T	14	212	0.9381	2	2	38	37	0.98	1	1	13	1	66	146	T
comp543_c0	582	C	A	25	185	0.881	2	2	36	36	0.98	1	1	24	1	40	145	A
comp543_c0	585	T	A	31	174	0.8488	2	2	36	31	0.98	1	1	30	1	23	151	A
comp543_c0	591	C	G	36	183	0.8356	2	2	38	37	0.98	1	1	35	1	20	163	G
comp543_c0	597	A	T	39	169	0.8125	2	2	38	38	0.98	1	1	36	3	10	159	T
comp543_c0	632	T	Y	69	96	0.5818	2	2	37	39	0.98	1	1	56	13	1	95	C
comp547_c1	245	G	S	228	104	0.3133	2	2	35	36	0.98	1	1	92	136	26	78	C
comp547_c1	275	C	S	224	159	0.4151	2	2	36	37	0.98	1	1	142	82	90	69	G
comp547_c1	296	C	S	240	122	0.337	2	2	35	34	0.98	1	1	142	98	78	44	G
comp547_c1	302	C	S	242	136	0.3598	2	2	35	34	0.98	1	1	142	100	94	42	G
comp547_c1	306	G	S	239	145	0.3776	2	2	36	35	0.98	1	1	139	100	103	42	C
comp547_c1	314	T	Y	260	166	0.3897	2	2	36	36	0.98	1	1	156	104	122	44	C
comp547_c1	368	T	Y	290	213	0.4235	2	2	35	34	0.98	1	1	155	135	155	58	C
comp547_c1	370	C	Y	295	215	0.4216	2	2	35	33	0.98	1	1	157	138	157	58	T
comp547_c1	382	C	Y	283	233	0.4516	2	2	36	31	0.98	1	1	150	133	162	71	T
comp547_c1	395	C	S	315	137	0.3031	2	2	35	35	0.98	1	1	166	149	59	78	G
comp547_c1	408	A	R	306	310	0.5032	2	2	33	35	0.98	1	1	156	150	135	175	G
comp547_c1	411	A	R	301	326	0.5199	2	2	33	36	0.98	1	1	153	148	138	188	G
comp547_c1	424	T	Y	274	388	0.5861	2	2	36	36	0.98	1	1	130	144	172	216	C
comp547_c1	429	G	K	269	416	0.6073	2	2	35	34	0.98	1	1	123	146	202	214	T
comp548_c0	585	C	S	510	263	0.3402	2	2	34	34	0.98	1	1	321	189	242	21	G
comp548_c0	645	G	K	316	147	0.3175	2	2	37	35	0.98	1	1	96	220	111	36	T
comp548_c0	648	G	S	286	148	0.341	2	2	37	36	0.98	1	1	86	200	112	36	C
comp54_c0	92	C	S	37	22	0.3729	2	2	37	38	0.98	1	1	36	1	18	4	G
comp550_c0	866	T	Y	70	36	0.3396	2	2	35	35	0.98	1	1	55	15	29	7	C
comp552_c0	274	T	K	78	65	0.4545	2	2	35	32	0.98	1	1	56	22	28	37	G
comp560_c0	48	C	S	100	195	0.661	2	2	37	36	0.98	1	1	98	2	193	2	G
comp560_c0	317	C	Y	106	176	0.6241	2	2	34	34	0.98	1	1	48	58	101	75	T
comp560_c0	332	T	K	98	129	0.5683	2	2	35	35	0.98	1	1	38	60	63	66	G
comp563_c0	818	T	W	133	139	0.511	2	2	39	38	0.98	1	1	1	132	133	6	A
comp563_c0	819	G	R	133	139	0.511	2	2	39	38	0.98	1	1	1	132	133	6	A
comp563_c0	820	T	Y	133	139	0.511	2	2	39	38	0.98	1	1	1	132	133	6	C
comp563_c0	836	G	S	115	189	0.6217	2	2	38	38	0.98	1	1	2	113	163	26	C
comp563_c0	839	T	K	107	195	0.6457	1	2	39	38	0.98	1	1	0	107	167	28	G
comp574_c0	1192	C	S	95	88	0.4809	1	2	36	33	0.98	1	1	95	0	10	78	G
comp574_c0	1195	C	S	103	88	0.4607	1	2	36	33	0.98	1	1	103	0	9	79	G
comp574_c0	1201	C	S	102	93	0.4769	1	2	35	35	0.98	1	1	102	0	1	92	G
comp574_c0	1204	A	R	103	90	0.4663	1	2	35	34	0.98	1	1	103	0	1	89	G
comp575_c0	94	C	M	90	63	0.4118	1	2	38	38	0.98	1	1	90	0	56	7	A
comp59_c0	156	C	G	15	1546	0.9904	2	2	37	34	0.98	1	1	12	3	839	707	G
comp5_c0	330	G	K	336	825	0.7106	2	2	36	35	0.98	1	1	257	79	719	106	T
comp5_c0	344	C	T	180	682	0.7912	2	2	37	33	0.98	1	1	156	24	657	25	T
comp5_c0	358	G	S	275	252	0.4782	2	2	37	34	0.98	1	1	232	43	227	25	C
comp5_c0	466	A	R	476	319	0.4013	2	2	36	34	0.98	1	1	221	255	249	70	G
comp5_c0	479	G	R	594	258	0.3028	2	2	36	33	0.98	1	1	334	260	251	7	A
comp5_c0	541	T	K	378	405	0.5172	2	2	35	34	0.98	1	1	155	223	284	121	G
comp5_c0	543	A	W	391	337	0.4629	2	2	35	26	0.98	1	1	159	232	246	91	T
comp5_c0	545	A	R	401	253	0.3869	2	2	35	32	0.98	1	1	164	237	250	3	G
comp5_c0	709	A	R	577	530	0.4788	2	2	35	36	0.98	1	1	205	372	204	326	G
comp5_c0	730	C	Y	742	456	0.3806	2	2	36	36	0.98	1	1	302	440	225	231	T
comp5_c0	772	G	S	509	492	0.4915	2	2	36	35	0.98	1	1	239	270	189	303	C
comp5_c0	774	A	R	484	487	0.5015	2	2	33	33	0.98	1	1	238	246	190	297	G
comp5_c0	789	G	S	371	507	0.5774	2	2	35	35	0.98	1	1	199	172	241	266	C
comp5_c0	1162	C	Y	215	567	0.7251	2	2	36	36	0.98	1	1	156	59	515	52	T
comp5_c0	1168	G	K	415	477	0.5348	2	2	36	35	0.98	1	1	266	149	460	17	T
comp5_c0	1176	C	Y	554	410	0.4253	2	2	37	34	0.98	1	1	368	186	409	1	T
comp603_c0	832	A	C	15	65	0.8125	1	2	36	33	0.98	1	1	15	0	41	24	C
comp603_c0	833	G	T	14	45	0.7627	1	2	38	33	0.98	1	1	14	0	33	12	T
comp603_c0	922	A	W	16	7	0.3043	2	2	33	35	0.98	1	1	1	15	2	5	T
comp604_c0	364	G	R	4	7	0.6364	1	2	40	36	0.98	1	1	0	4	2	5	A
comp604_c0	365	G	R	4	7	0.6364	1	2	40	36	0.98	1	1	0	4	2	5	A
comp604_c0	1167	T	W	7	8	0.5333	2	2	38	37	0.98	1	1	6	1	3	5	A
comp604_c0	1175	T	Y	7	8	0.5333	2	2	40	36	0.98	1	1	6	1	3	5	C
comp604_c0	2139	C	Y	9	4	0.3077	2	2	36	36	0.98	1	1	6	3	2	2	T
comp615_c1	150	T	Y	9	5	0.3571	1	2	35	40	0.98	1	1	9	0	3	2	C
comp617_c0	593	C	Y	69	120	0.6349	2	2	36	38	0.98	1	1	33	36	3	117	T
comp623_c0	1221	C	T	0	46	1	0	2	0	38	0.98	0	1	0	0	21	25	T
comp623_c0	1785	C	M	8	12	0.6	2	2	37	36	0.98	1	1	5	3	10	2	A
comp623_c0	1799	G	R	19	11	0.3667	2	2	37	35	0.98	1	1	15	4	10	1	A
comp623_c0	1802	T	Y	19	11	0.3667	2	2	35	34	0.98	1	1	15	4	10	1	C
comp625_c0	117	G	C	0	133	1	0	2	0	35	0.98	0	1	0	0	115	18	C
comp625_c0	150	T	K	82	97	0.5419	2	2	36	34	0.98	1	1	38	44	31	66	G
comp625_c0	155	A	W	93	102	0.5231	2	2	35	33	0.98	1	1	40	53	29	73	T
comp625_c0	160	G	R	112	99	0.4692	2	2	36	33	0.98	1	1	41	71	26	73	A
comp625_c0	161	T	Y	112	94	0.4563	2	2	35	35	0.98	1	1	41	71	21	73	C
comp626_c0	726	A	R	77	95	0.5523	2	2	37	36	0.98	1	1	75	2	36	59	G
comp626_c0	732	T	K	78	95	0.5491	2	2	39	36	0.98	1	1	75	3	34	61	G
comp626_c0	741	A	R	101	96	0.4873	2	2	38	37	0.98	1	1	97	4	31	65	G
comp626_c0	753	C	Y	114	69	0.377	2	2	39	36	0.98	1	1	105	9	23	46	T
comp626_c0	756	A	M	117	71	0.3777	2	2	38	36	0.98	1	1	106	11	16	55	C
comp630_c0	497	A	G	0	13	1	0	2	0	38	0.98	0	1	0	0	5	8	G
comp630_c0	693	G	T	2	32	0.9412	2	2	37	35	0.98	1	1	1	1	1	31	T
comp630_c0	717	G	T	1	72	0.9863	1	2	40	36	0.98	1	1	0	1	6	66	T
comp630_c0	722	C	T	1	88	0.9888	1	2	38	36	0.98	1	1	0	1	18	70	T
comp630_c0	797	A	R	168	74	0.3058	2	2	38	38	0.98	1	1	61	107	42	32	G
comp630_c0	1057	G	A	12	88	0.88	2	2	37	38	0.98	1	1	8	4	36	52	A
comp630_c0	1098	G	R	29	67	0.6979	2	2	38	34	0.98	1	1	25	4	21	46	A
comp630_c0	1224	T	Y	61	34	0.3579	2	2	37	36	0.98	1	1	33	28	19	15	C
comp630_c0	1238	C	S	67	44	0.3964	2	2	37	38	0.98	1	1	39	28	34	10	G
comp630_c0	1482	A	R	77	40	0.3419	2	2	38	37	0.98	1	1	38	39	20	20	G
comp630_c0	1914	C	Y	118	74	0.3854	2	2	37	36	0.98	1	1	69	49	41	33	T
comp630_c0	1985	A	R	108	54	0.3333	2	2	37	37	0.98	1	1	47	61	24	30	G
comp630_c0	2051	A	W	57	48	0.4571	2	2	33	36	0.98	1	1	12	45	14	34	T
comp630_c0	2171	A	R	56	28	0.3333	2	2	37	36	0.98	1	1	22	34	14	14	G
comp630_c0	2177	C	M	58	28	0.3256	2	2	37	37	0.98	1	1	23	35	14	14	A
comp630_c0	2230	C	S	42	18	0.3	2	2	38	35	0.98	1	1	7	35	8	10	G
comp630_c0	2252	G	R	24	12	0.3333	2	2	38	39	0.98	1	1	3	21	1	11	A
comp637_c0	64	C	Y	9	6	0.4	1	2	38	34	0.98	1	1	0	9	3	3	T
comp637_c0	79	C	Y	9	17	0.6538	1	2	39	36	0.98	1	1	0	9	3	14	T
comp637_c0	88	C	Y	9	23	0.7188	1	2	39	36	0.98	1	1	0	9	6	17	T
comp637_c0	100	A	C	9	39	0.8125	1	2	37	37	0.98	1	1	0	9	10	29	C
comp63_c0	396	A	R	45	33	0.4231	1	2	35	37	0.98	1	1	0	45	18	15	G
comp63_c0	1146	C	T	0	380	1	0	2	0	37	0.98	0	1	0	0	265	115	T
comp63_c0	1152	T	C	0	409	1	0	2	0	37	0.98	0	1	0	0	274	135	C
comp63_c0	1170	A	T	0	361	1	0	2	0	37	0.98	0	1	0	0	251	110	T
comp63_c0	1179	G	A	0	424	1	0	2	0	37	0.98	0	1	0	0	294	130	A
comp63_c0	1182	C	T	0	429	1	0	2	0	37	0.98	0	1	0	0	295	134	T
comp644_c0	1108	G	A	16	215	0.9307	2	2	35	36	0.98	1	1	15	1	101	114	A
comp644_c0	1111	T	C	16	215	0.9307	2	2	37	37	0.98	1	1	15	1	95	120	C
comp644_c0	1129	C	A	32	183	0.8512	2	2	36	36	0.98	1	1	29	3	73	110	A
comp644_c0	1130	A	G	34	183	0.8433	2	2	36	36	0.98	1	1	32	2	73	110	G
comp644_c0	1138	T	A	38	164	0.8119	2	2	38	37	0.98	1	1	35	3	43	121	A
comp644_c0	1151	C	M	52	139	0.7277	2	2	38	38	0.98	1	1	50	2	1	138	A
comp645_c0	3295	C	M	7	4	0.3636	2	2	35	38	0.98	1	1	1	6	2	2	A
comp651_c0	1506	T	Y	24	11	0.3143	1	2	34	33	0.98	1	1	0	24	1	10	C
comp656_c0	1009	C	Y	326	172	0.3454	2	2	37	38	0.98	1	1	190	136	162	10	T
comp656_c0	1011	A	R	327	183	0.3588	2	2	37	38	0.98	1	1	190	137	163	20	G
comp656_c0	1013	T	Y	332	184	0.3566	2	2	37	38	0.98	1	1	192	140	163	21	C
comp656_c0	1033	A	R	336	194	0.366	2	2	37	37	0.98	1	1	187	149	126	68	G
comp656_c0	1036	G	R	335	195	0.3679	2	2	37	36	0.98	1	1	186	149	119	76	A
comp656_c0	1063	G	R	341	330	0.4918	2	2	38	38	0.98	1	1	219	122	169	161	A
comp656_c0	1099	C	Y	349	272	0.438	2	2	38	37	0.98	1	1	175	174	110	162	T
comp656_c0	1113	T	Y	428	233	0.3525	2	2	37	38	0.98	1	1	163	265	94	139	C
comp656_c0	1129	T	W	431	199	0.3159	2	2	37	37	0.98	1	1	176	255	51	148	A
comp656_c0	1132	C	Y	431	191	0.3071	2	2	37	37	0.98	1	1	178	253	51	140	T
comp656_c0	2884	G	R	286	126	0.3058	2	2	38	39	0.98	1	1	151	135	122	4	A
comp656_c0	2893	A	M	277	137	0.3309	2	2	38	39	0.98	1	1	151	126	131	6	C
comp656_c0	2911	G	R	243	163	0.4015	2	2	37	37	0.98	1	1	148	95	102	61	A
comp656_c0	2914	C	Y	244	161	0.3975	2	2	36	37	0.98	1	1	154	90	97	64	T
comp656_c0	2947	G	R	232	173	0.4272	2	2	37	36	0.98	1	1	136	96	52	121	A
comp656_c0	2956	T	W	234	166	0.415	2	2	38	36	0.98	1	1	127	107	51	115	A
comp656_c0	2962	A	W	236	153	0.3933	2	2	38	37	0.98	1	1	115	121	51	102	T
comp656_c0	2968	A	R	241	148	0.3805	2	2	35	36	0.98	1	1	116	125	41	107	G
comp656_c0	3888	A	R	92	81	0.4682	2	2	38	38	0.98	1	1	40	52	74	7	G
comp656_c0	3898	C	Y	86	83	0.4911	2	2	38	39	0.98	1	1	43	43	75	8	T
comp656_c0	3919	A	W	87	84	0.4912	2	2	37	39	0.98	1	1	44	43	66	18	T
comp656_c0	3933	C	Y	73	91	0.5549	2	2	36	37	0.98	1	1	40	33	55	36	T
comp656_c0	3936	T	K	67	93	0.5813	2	2	36	37	0.98	1	1	40	27	56	37	G
comp656_c0	3964	T	W	114	49	0.3006	2	2	37	35	0.98	1	1	55	59	20	29	A
comp656_c0	3970	A	R	120	52	0.3023	2	2	37	34	0.98	1	1	55	65	20	32	G
comp656_c0	4180	C	Y	88	51	0.3669	2	2	37	37	0.98	1	1	53	35	50	1	T
comp656_c0	4185	A	R	86	43	0.3333	2	2	37	36	0.98	1	1	53	33	38	5	G
comp656_c0	4186	T	Y	86	44	0.3385	2	2	36	36	0.98	1	1	53	33	38	6	C
comp656_c0	4189	A	R	88	53	0.3759	2	2	36	34	0.98	1	1	51	37	41	12	G
comp656_c0	4201	T	Y	81	74	0.4774	2	2	36	34	0.98	1	1	42	39	58	16	C
comp656_c0	4228	C	Y	113	60	0.3468	2	2	37	37	0.98	1	1	74	39	4	56	T
comp656_c0	4246	A	R	123	59	0.3242	2	2	38	38	0.98	1	1	74	49	3	56	G
comp656_c0	4783	G	R	133	62	0.3179	2	2	38	37	0.98	1	1	66	67	60	2	A
comp656_c0	4813	T	K	114	70	0.3804	2	2	37	39	0.98	1	1	55	59	69	1	G
comp656_c0	4822	T	Y	94	82	0.4659	2	2	38	39	0.98	1	1	48	46	78	4	C
comp656_c0	4825	C	S	94	88	0.4835	2	2	38	39	0.98	1	1	48	46	84	4	G
comp656_c0	4828	T	W	93	85	0.4775	2	2	39	38	0.98	1	1	48	45	81	4	A
comp656_c0	4840	A	R	86	98	0.5326	2	2	37	37	0.98	1	1	48	38	75	23	G
comp656_c0	4879	C	Y	116	58	0.3333	2	2	37	38	0.98	1	1	56	60	4	54	T
comp656_c0	4881	C	Y	117	56	0.3237	2	2	37	38	0.98	1	1	56	61	4	52	T
comp656_c0	4882	A	R	117	56	0.3237	2	2	37	37	0.98	1	1	56	61	4	52	G
comp656_c0	4888	A	M	122	58	0.3222	2	2	37	37	0.98	1	1	52	70	1	57	C
comp664_c0	983	C	S	12	34	0.7391	2	2	34	35	0.98	1	1	10	2	10	24	G
comp664_c0	986	C	G	11	35	0.7609	2	2	36	35	0.98	1	1	10	1	8	27	G
comp664_c0	989	C	G	11	34	0.7556	2	2	38	35	0.98	1	1	10	1	7	27	G
comp664_c0	996	C	Y	15	32	0.6809	2	2	37	35	0.98	1	1	14	1	2	30	T
comp666_c0	7787	G	R	11	10	0.4762	2	2	37	38	0.98	1	1	5	6	5	5	A
comp666_c0	8089	A	R	26	22	0.4583	2	2	37	37	0.98	1	1	7	19	3	19	G
comp666_c0	9276	A	R	64	30	0.3191	2	2	37	38	0.98	1	1	35	29	14	16	G
comp667_c0	52	G	C	19	106	0.848	2	2	34	36	0.98	1	1	1	18	102	4	C
comp667_c0	56	A	G	19	111	0.8538	2	2	34	36	0.98	1	1	1	18	105	6	G
comp667_c0	58	C	G	19	114	0.8571	2	2	34	37	0.98	1	1	1	18	105	9	G
comp667_c0	65	G	A	21	140	0.8696	2	2	35	35	0.98	1	1	3	18	125	15	A
comp667_c0	82	G	A	22	154	0.875	2	2	39	34	0.98	1	1	4	18	126	28	A
comp670_c0	62	C	A	2	10	0.8333	1	2	39	35	0.98	1	1	0	2	8	2	A
comp670_c0	74	C	T	3	26	0.8966	2	2	34	36	0.98	1	1	1	2	18	8	T
comp670_c0	247	G	S	36	19	0.3455	2	2	37	31	0.98	1	1	9	27	1	18	C
comp670_c0	252	A	R	35	36	0.507	2	2	36	32	0.98	1	1	8	27	3	33	G
comp673_c0	834	G	S	16	8	0.3333	2	2	33	33	0.98	1	1	2	14	2	6	C
comp675_c0	72	T	W	342	219	0.3904	2	2	37	37	0.98	1	1	172	170	112	107	A
comp675_c0	83	T	Y	361	218	0.3765	2	2	37	36	0.98	1	1	171	190	113	105	C
comp675_c0	91	C	Y	402	219	0.3527	2	2	38	38	0.98	1	1	194	208	114	105	T
comp675_c0	141	G	S	368	195	0.3464	2	2	37	37	0.98	1	1	162	206	76	119	C
comp675_c0	180	G	R	336	148	0.3058	2	2	37	38	0.98	1	1	121	215	51	97	A
comp675_c0	181	A	R	333	147	0.3063	2	2	37	38	0.98	1	1	121	212	51	96	G
comp675_c0	278	T	W	313	142	0.3121	2	2	37	38	0.98	1	1	156	157	82	60	A
comp675_c0	289	T	Y	298	148	0.3318	2	2	35	36	0.98	1	1	123	175	79	69	C
comp675_c0	301	G	S	290	153	0.3454	2	2	37	36	0.98	1	1	105	185	78	75	C
comp675_c0	311	G	S	277	151	0.3528	2	2	36	35	0.98	1	1	76	201	61	90	C
comp675_c0	397	G	R	65	58	0.4715	2	2	36	36	0.98	1	1	23	42	14	44	A
comp677_c0	1200	T	Y	12	10	0.4545	2	2	33	36	0.98	1	1	2	10	9	1	C
comp677_c0	1227	A	G	1	14	0.9333	1	2	34	36	0.98	1	1	1	0	12	2	G
comp677_c0	1249	A	C	4	13	0.7647	1	2	36	37	0.98	1	1	4	0	11	2	C
comp677_c0	1250	C	A	4	13	0.7647	1	2	38	37	0.98	1	1	4	0	11	2	A
comp687_c0	295	A	R	81	61	0.4296	2	2	39	38	0.98	1	1	67	14	56	5	G
comp687_c0	320	T	Y	114	76	0.4	2	2	37	37	0.98	1	1	75	39	60	16	C
comp687_c0	366	C	M	150	97	0.3927	2	2	37	37	0.98	1	1	78	72	46	51	A
comp687_c0	380	T	W	137	85	0.3829	2	2	37	38	0.98	1	1	68	69	30	55	A
comp687_c0	478	C	M	229	135	0.3709	2	2	37	37	0.98	1	1	148	81	119	16	A
comp687_c0	604	A	M	137	63	0.315	2	2	38	38	0.98	1	1	51	86	22	41	C
comp687_c0	606	A	R	138	69	0.3333	2	2	37	38	0.98	1	1	52	86	28	41	G
comp687_c0	659	T	Y	91	72	0.4417	2	2	38	37	0.98	1	1	58	33	50	22	C
comp687_c0	662	C	Y	86	73	0.4591	2	2	38	35	0.98	1	1	52	34	49	24	T
comp687_c0	670	T	Y	107	87	0.4485	2	2	37	37	0.98	1	1	61	46	43	44	C
comp687_c0	794	C	Y	64	39	0.3786	2	2	35	38	0.98	1	1	17	47	9	30	T
comp692_c0	824	C	Y	5	13	0.7222	2	2	33	35	0.98	1	1	4	1	5	8	T
comp692_c0	827	A	M	5	13	0.7222	2	2	31	36	0.98	1	1	4	1	5	8	C
comp692_c0	831	G	K	6	12	0.6667	2	2	33	35	0.98	1	1	4	2	4	8	T
comp692_c0	845	C	S	6	8	0.5714	2	2	33	36	0.98	1	1	4	2	3	5	G
comp692_c0	848	G	S	7	7	0.5	2	2	33	35	0.98	1	1	3	4	3	4	C
comp692_c0	854	G	S	7	6	0.4615	2	2	32	38	0.98	1	1	3	4	2	4	C
comp692_c0	858	G	S	7	7	0.5	2	2	33	36	0.98	1	1	3	4	3	4	C
comp692_c0	905	G	S	14	10	0.4167	2	2	36	36	0.98	1	1	7	7	6	4	C
comp692_c0	969	C	Y	6	10	0.625	1	2	40	32	0.98	1	1	0	6	5	5	T
comp693_c1	3106	G	R	70	33	0.3204	2	2	38	38	0.98	1	1	39	31	26	7	A
comp693_c1	3252	T	Y	55	29	0.3452	2	2	37	38	0.98	1	1	33	22	9	20	C
comp693_c1	3255	C	Y	54	25	0.3165	2	2	37	37	0.98	1	1	32	22	9	16	T
comp703_c0	25	C	T	54	230	0.8099	2	2	37	38	0.98	1	1	51	3	220	10	T
comp703_c0	96	A	W	407	185	0.3125	2	2	37	37	0.98	1	1	216	191	113	72	T
comp703_c0	174	T	Y	402	173	0.3009	2	2	37	38	0.98	1	1	148	254	39	134	C
comp703_c0	204	C	Y	248	218	0.4678	2	2	37	38	0.98	1	1	127	121	55	163	T
comp703_c0	207	G	K	266	216	0.4481	2	2	37	37	0.98	1	1	130	136	49	167	T
comp703_c0	237	C	Y	233	106	0.3127	2	2	37	37	0.98	1	1	138	95	68	38	T
comp703_c0	327	T	Y	180	93	0.3407	2	2	38	39	0.98	1	1	45	135	24	69	C
comp706_c0	25	C	S	80	78	0.4937	2	2	35	38	0.98	1	1	62	18	77	1	G
comp706_c0	31	C	S	83	84	0.503	2	2	35	38	0.98	1	1	48	35	83	1	G
comp706_c0	52	A	R	91	140	0.6061	2	2	35	38	0.98	1	1	44	47	128	12	G
comp706_c0	55	C	Y	92	149	0.6183	2	2	35	37	0.98	1	1	43	49	135	14	T
comp706_c0	67	C	Y	96	187	0.6608	2	2	37	37	0.98	1	1	45	51	139	48	T
comp706_c0	82	C	Y	97	263	0.7306	2	2	36	34	0.98	1	1	46	51	139	124	T
comp706_c0	94	T	C	95	305	0.7625	2	2	36	36	0.98	1	1	45	50	131	174	C
comp706_c0	364	T	Y	350	177	0.3359	2	2	37	38	0.98	1	1	237	113	176	1	C
comp706_c0	370	A	R	337	191	0.3617	2	2	36	37	0.98	1	1	232	105	164	27	G
comp706_c0	376	A	M	321	195	0.3779	2	2	36	36	0.98	1	1	216	105	159	36	C
comp706_c0	379	C	Y	317	191	0.376	2	2	37	36	0.98	1	1	214	103	146	45	T
comp706_c0	382	T	Y	315	200	0.3883	2	2	37	36	0.98	1	1	212	103	145	55	C
comp706_c0	397	C	Y	287	218	0.4317	2	2	36	31	0.98	1	1	180	107	133	85	T
comp706_c0	424	C	S	294	208	0.4143	2	2	36	36	0.98	1	1	110	184	99	109	G
comp706_c0	433	C	S	332	159	0.3238	2	2	35	37	0.98	1	1	115	217	67	92	G
comp70_c0	547	A	M	38	42	0.525	2	2	34	33	0.98	1	1	5	33	12	30	C
comp70_c0	568	A	R	36	67	0.6505	2	2	36	37	0.98	1	1	8	28	26	41	G
comp70_c0	658	G	S	244	128	0.3441	2	2	38	37	0.98	1	1	100	144	35	93	C
comp70_c0	661	G	R	229	149	0.3942	2	2	38	37	0.98	1	1	97	132	38	111	A
comp70_c0	670	A	R	233	157	0.4026	2	2	38	38	0.98	1	1	100	133	36	121	G
comp70_c0	702	G	R	279	196	0.4126	2	2	37	38	0.98	1	1	165	114	100	96	A
comp70_c0	982	A	R	668	506	0.431	2	2	36	37	0.98	1	1	294	374	209	297	G
comp70_c0	1081	A	R	314	235	0.4281	2	2	36	35	0.98	1	1	74	240	54	181	G
comp70_c0	1102	A	R	271	122	0.3104	2	2	37	36	0.98	1	1	94	177	22	100	G
comp70_c0	1135	C	S	179	80	0.3089	2	2	37	36	0.98	1	1	82	97	16	64	G
comp70_c0	1144	C	Y	197	114	0.3666	2	2	35	36	0.98	1	1	102	95	60	54	T
comp70_c0	1177	G	R	262	146	0.3578	2	2	35	38	0.98	1	1	160	102	113	33	A
comp70_c0	1201	T	Y	270	160	0.3721	2	2	36	36	0.98	1	1	187	83	145	15	C
comp70_c0	1204	C	M	297	157	0.3458	2	2	36	35	0.98	1	1	215	82	145	12	A
comp70_c0	1216	G	R	355	160	0.3107	2	2	36	35	0.98	1	1	267	88	151	9	A
comp70_c0	1225	T	W	363	165	0.3125	2	2	36	35	0.98	1	1	274	89	148	17	A
comp70_c0	1228	G	R	379	167	0.3059	2	2	36	35	0.98	1	1	290	89	150	17	A
comp70_c0	1297	G	S	523	248	0.3217	2	2	36	38	0.98	1	1	239	284	102	146	C
comp70_c0	1354	C	M	429	244	0.3626	2	2	36	37	0.98	1	1	146	283	140	104	A
comp70_c0	1360	A	R	430	236	0.3544	2	2	38	37	0.98	1	1	139	291	134	102	G
comp70_c0	1378	G	K	415	228	0.3546	2	2	37	37	0.98	1	1	161	254	132	96	T
comp70_c0	1381	G	R	344	231	0.4017	2	2	37	37	0.98	1	1	171	173	133	98	A
comp70_c0	1431	A	R	367	231	0.3863	2	2	36	37	0.98	1	1	232	135	127	104	G
comp70_c0	1447	G	R	353	202	0.364	2	2	36	35	0.98	1	1	223	130	95	107	A
comp70_c0	1455	G	R	355	212	0.3739	2	2	36	36	0.98	1	1	225	130	100	112	A
comp70_c0	1462	C	S	355	199	0.3592	2	2	36	37	0.98	1	1	227	128	100	99	G
comp70_c0	1468	A	R	350	211	0.3761	2	2	36	36	0.98	1	1	218	132	106	105	G
comp70_c0	1501	A	R	321	221	0.4077	2	2	34	36	0.98	1	1	145	176	101	120	G
comp70_c0	1533	A	W	288	195	0.4037	2	2	33	32	0.98	1	1	96	192	82	113	T
comp70_c0	1544	C	S	298	230	0.4356	2	2	34	35	0.98	1	1	80	218	101	129	G
comp70_c0	1546	G	R	293	230	0.4398	2	2	35	35	0.98	1	1	73	220	101	129	A
comp70_c0	1585	G	K	405	272	0.4018	2	2	37	36	0.98	1	1	211	194	141	131	T
comp70_c0	1657	A	M	358	169	0.3207	2	2	33	34	0.98	1	1	246	112	86	83	C
comp70_c2	1567	C	S	56	35	0.3846	2	2	37	35	0.98	1	1	22	34	17	18	G
comp711_c0	410	C	Y	224	100	0.3086	2	2	36	35	0.98	1	1	136	88	76	24	T
comp717_c0	556	T	C	0	25	1	0	2	0	39	0.98	0	1	0	0	4	21	C
comp717_c0	560	C	G	0	25	1	0	2	0	38	0.98	0	1	0	0	4	21	G
comp717_c0	569	A	G	0	23	1	0	2	0	38	0.98	0	1	0	0	2	21	G
comp720_c0	244	A	R	263	139	0.3458	2	2	35	35	0.98	1	1	93	170	44	95	G
comp739_c0	2075	C	Y	90	51	0.3617	2	2	37	37	0.98	1	1	59	31	33	18	T
comp739_c0	6962	T	Y	50	23	0.3151	2	2	37	37	0.98	1	1	29	21	16	7	C
comp739_c0	7013	T	Y	39	51	0.5667	2	2	38	38	0.98	1	1	14	25	26	25	C
comp740_c0	978	A	W	128	92	0.4182	2	2	37	36	0.98	1	1	61	67	48	44	T
comp747_c0	557	G	R	244	149	0.3791	2	2	34	34	0.98	1	1	138	106	116	33	A
comp747_c0	590	G	R	196	186	0.4869	2	2	37	34	0.98	1	1	119	77	30	156	A
comp747_c0	596	A	R	209	183	0.4668	2	2	37	36	0.98	1	1	125	84	17	166	G
comp747_c0	602	A	W	216	185	0.4613	2	2	37	35	0.98	1	1	122	94	12	173	T
comp747_c0	608	A	R	224	176	0.44	2	2	37	36	0.98	1	1	124	100	8	168	G
comp747_c0	614	A	R	236	175	0.4258	2	2	38	36	0.98	1	1	123	113	7	168	G
comp747_c0	1001	G	R	207	141	0.4052	2	2	37	37	0.98	1	1	82	125	109	32	A
comp747_c0	1016	A	R	205	149	0.4209	2	2	38	37	0.98	1	1	68	137	106	43	G
comp747_c0	1019	A	R	201	157	0.4385	2	2	36	37	0.98	1	1	60	141	108	49	G
comp747_c0	1028	T	W	184	157	0.4604	2	2	37	37	0.98	1	1	44	140	105	52	A
comp747_c0	1031	T	Y	176	176	0.5	2	2	37	36	0.98	1	1	44	132	119	57	C
comp747_c0	1058	A	R	188	134	0.4161	2	2	37	37	0.98	1	1	85	103	26	108	G
comp747_c0	1061	T	W	189	132	0.4112	2	2	37	37	0.98	1	1	85	104	25	107	A
comp747_c0	1070	A	W	222	117	0.3451	2	2	36	37	0.98	1	1	110	112	18	99	T
comp747_c0	1076	T	Y	227	107	0.3204	2	2	36	37	0.98	1	1	100	127	4	103	C
comp755_c0	106	C	Y	7	17	0.7083	2	2	35	33	0.98	1	1	3	4	13	4	T
comp755_c0	113	T	Y	7	18	0.72	2	2	36	32	0.98	1	1	3	4	12	6	C
comp755_c0	119	T	Y	7	20	0.7407	2	2	36	32	0.98	1	1	3	4	11	9	C
comp755_c0	136	G	C	4	34	0.8947	1	2	40	34	0.98	1	1	0	4	19	15	C
comp75_c0	419	T	C	399	1276	0.7618	2	2	36	35	0.98	1	1	282	117	1178	98	C
comp75_c0	427	C	T	349	1551	0.8163	2	2	35	35	0.98	1	1	243	106	1355	196	T
comp75_c0	430	G	C	337	1662	0.8314	2	2	35	36	0.98	1	1	228	109	1425	237	C
comp75_c0	470	G	T	275	1639	0.8563	2	2	33	32	0.98	1	1	99	176	706	933	T
comp75_c0	484	T	C	267	1781	0.8696	2	2	34	34	0.98	1	1	50	217	599	1182	C
comp762_c0	967	T	G	10	119	0.9225	2	2	35	37	0.98	1	1	1	9	46	73	G
comp766_c0	364	G	R	32	19	0.3725	2	2	34	37	0.98	1	1	23	9	13	6	A
comp766_c0	772	T	Y	41	19	0.3167	2	2	35	37	0.98	1	1	13	28	7	12	C
comp766_c0	1267	G	R	47	23	0.3286	2	2	39	38	0.98	1	1	16	31	12	11	A
comp766_c0	1614	G	R	25	13	0.3421	2	2	39	37	0.98	1	1	8	17	11	2	A
comp766_c0	1637	A	W	20	18	0.4737	2	2	36	36	0.98	1	1	12	8	13	5	T
comp766_c0	1645	A	W	25	12	0.3243	2	2	36	38	0.98	1	1	16	9	10	2	T
comp766_c0	1679	T	K	24	19	0.4419	2	2	37	35	0.98	1	1	16	8	12	7	G
comp766_c0	1744	G	R	17	13	0.4333	2	2	37	38	0.98	1	1	6	11	7	6	A
comp766_c0	1780	A	G	3	10	0.7692	2	2	33	36	0.98	1	1	2	1	4	6	G
comp76_c1	595	T	K	345	159	0.3155	2	2	32	35	0.98	1	1	203	142	152	7	G
comp76_c1	601	C	Y	401	226	0.3604	2	2	36	34	0.98	1	1	258	143	187	39	T
comp76_c1	604	T	Y	354	271	0.4336	2	2	36	36	0.98	1	1	213	141	224	47	C
comp76_c1	652	C	S	350	250	0.4167	2	2	36	34	0.98	1	1	219	131	27	223	G
comp76_c1	679	C	Y	459	201	0.3045	2	2	34	38	0.98	1	1	159	300	10	191	T
comp76_c1	682	C	S	454	204	0.31	2	2	35	38	0.98	1	1	154	300	8	196	G
comp76_c2	309	C	S	23	23	0.5	1	2	37	31	0.98	1	1	23	0	10	13	G
comp76_c2	316	A	M	40	20	0.3333	1	2	36	36	0.98	1	1	40	0	7	13	C
comp76_c2	318	C	S	42	21	0.3333	1	2	38	36	0.98	1	1	42	0	8	13	G
comp76_c2	1623	A	C	8	42	0.84	2	2	36	35	0.98	1	1	7	1	33	9	C
comp76_c2	1788	T	Y	48	44	0.4783	2	2	39	34	0.98	1	1	23	25	14	30	C
comp76_c2	1818	C	S	69	33	0.3235	2	2	38	36	0.98	1	1	26	43	18	15	G
comp777_c0	1226	C	A	0	126	1	0	2	0	37	0.98	0	1	0	0	76	50	A
comp777_c0	1256	A	T	0	116	1	0	2	0	36	0.98	0	1	0	0	66	50	T
comp777_c0	1262	T	C	1	109	0.9909	1	2	34	37	0.98	1	1	1	0	65	44	C
comp777_c0	1265	T	C	0	124	1	0	2	0	36	0.98	0	1	0	0	80	44	C
comp791_c0	543	G	S	266	177	0.3995	2	2	38	38	0.98	1	1	140	126	110	67	C
comp791_c0	1538	C	Y	139	184	0.5697	2	2	37	37	0.98	1	1	65	74	80	104	T
comp794_c0	1976	T	Y	5	13	0.7222	2	2	34	33	0.98	1	1	3	2	11	2	C
comp796_c0	97	C	Y	8	4	0.3333	1	2	36	40	0.98	1	1	0	8	2	2	T
comp79_c0	266	G	S	35	32	0.4776	2	2	37	36	0.98	1	1	26	9	18	14	C
comp79_c0	308	C	M	42	37	0.4684	2	2	38	39	0.98	1	1	23	19	18	19	A
comp79_c0	399	G	R	23	36	0.6102	2	2	37	36	0.98	1	1	12	11	12	24	A
comp79_c0	408	C	Y	45	20	0.3077	2	2	37	37	0.98	1	1	20	25	10	10	T
comp79_c0	493	G	R	42	23	0.3538	2	2	37	38	0.98	1	1	26	16	12	11	A
comp79_c0	561	C	M	37	27	0.4219	2	2	37	37	0.98	1	1	14	23	10	17	A
comp79_c0	563	C	Y	37	28	0.4308	2	2	37	37	0.98	1	1	14	23	11	17	T
comp79_c0	585	C	Y	36	26	0.4194	2	2	38	38	0.98	1	1	14	22	10	16	T
comp79_c0	606	A	R	36	24	0.4	2	2	37	38	0.98	1	1	17	19	11	13	G
comp79_c0	690	A	M	55	25	0.3125	2	2	38	36	0.98	1	1	32	23	14	11	C
comp79_c0	696	C	Y	56	26	0.3171	2	2	37	37	0.98	1	1	39	17	14	12	T
comp79_c0	1059	T	K	71	40	0.3604	2	2	38	37	0.98	1	1	44	27	22	18	G
comp79_c0	1092	A	W	62	41	0.3981	2	2	37	37	0.98	1	1	40	22	25	16	T
comp79_c0	1122	A	R	75	46	0.3802	2	2	36	36	0.98	1	1	47	28	36	10	G
comp79_c0	1300	C	Y	37	47	0.5595	2	2	35	36	0.98	1	1	18	19	18	29	T
comp79_c0	1501	C	Y	42	24	0.3636	2	2	35	36	0.98	1	1	26	16	10	14	T
comp7_c0	761	C	Y	69	158	0.696	2	2	37	38	0.98	1	1	44	25	100	58	T
comp7_c0	767	C	Y	147	103	0.412	2	2	36	38	0.98	1	1	83	64	65	38	T
comp7_c0	1778	T	Y	132	92	0.4107	2	2	35	35	0.98	1	1	66	66	55	37	C
comp7_c0	4558	T	Y	407	681	0.6259	2	2	36	37	0.98	1	1	252	155	28	653	C
comp803_c0	1070	A	R	130	62	0.3229	2	2	37	38	0.98	1	1	69	61	33	29	G
comp812_c0	2673	T	W	60	39	0.3939	2	2	30	36	0.98	1	1	21	39	1	38	A
comp812_c2	1873	C	S	35	18	0.3396	2	2	36	36	0.98	1	1	6	29	3	15	G
comp812_c2	1906	C	S	19	15	0.4412	2	2	39	37	0.98	1	1	1	18	6	9	G
comp812_c2	1912	A	R	16	17	0.5152	2	2	39	36	0.98	1	1	1	15	8	9	G
comp813_c0	504	T	Y	41	35	0.4605	2	2	37	36	0.98	1	1	13	28	16	19	C
comp813_c0	683	G	R	22	33	0.6	2	2	35	33	0.98	1	1	8	14	7	26	A
comp813_c0	689	T	Y	30	14	0.3182	2	2	35	33	0.98	1	1	14	16	7	7	C
comp813_c0	701	A	G	0	48	1	0	2	0	37	0.98	0	1	0	0	29	19	G
comp813_c0	713	G	A	0	52	1	0	2	0	38	0.98	0	1	0	0	29	23	A
comp813_c0	728	T	C	0	69	1	0	2	0	37	0.98	0	1	0	0	44	25	C
comp813_c0	734	C	T	1	75	0.9868	1	2	34	37	0.98	1	1	1	0	49	26	T
comp81_c0	125	C	S	804	380	0.3209	2	2	34	35	0.98	1	1	596	208	266	114	G
comp81_c0	155	T	K	746	448	0.3752	2	2	35	36	0.98	1	1	401	345	291	157	G
comp81_c0	191	G	R	807	619	0.4341	2	2	36	36	0.98	1	1	257	550	332	287	A
comp81_c0	227	T	Y	729	537	0.4242	2	2	36	37	0.98	1	1	377	352	135	402	C
comp81_c0	236	G	K	736	519	0.4135	2	2	37	37	0.98	1	1	397	339	138	381	T
comp81_c0	248	G	K	802	420	0.3437	2	2	37	36	0.98	1	1	417	385	96	324	T
comp824_c0	569	A	G	121	455	0.7899	2	2	37	37	0.98	1	1	42	79	231	224	G
comp824_c0	575	C	T	122	442	0.7837	2	2	37	38	0.98	1	1	44	78	218	224	T
comp824_c0	605	C	A	95	408	0.8111	2	2	37	37	0.98	1	1	38	57	203	205	A
comp824_c0	608	G	A	91	412	0.8191	2	2	37	37	0.98	1	1	34	57	206	206	A
comp824_c0	618	T	G	71	324	0.8203	2	2	34	38	0.98	1	1	32	39	153	171	G
comp824_c0	622	G	A	70	399	0.8507	2	2	37	36	0.98	1	1	32	38	156	243	A
comp831_c0	175	T	K	25	23	0.4792	1	2	37	38	0.98	1	1	25	0	19	4	G
comp833_c0	934	T	K	25	47	0.6528	1	2	37	36	0.98	1	1	25	0	18	29	G
comp833_c0	961	G	R	30	18	0.375	2	2	39	34	0.98	1	1	29	1	5	13	A
comp840_c0	96	T	Y	5	4	0.4444	2	2	41	36	0.98	1	1	4	1	3	1	C
comp840_c0	100	C	Y	7	4	0.3636	2	2	38	37	0.98	1	1	6	1	3	1	T
comp840_c0	411	G	K	6	9	0.6	1	2	40	37	0.98	1	1	6	0	2	7	T
comp840_c0	417	A	R	6	8	0.5714	1	2	38	35	0.98	1	1	6	0	2	6	G
comp840_c0	423	C	Y	6	6	0.5	1	2	37	37	0.98	1	1	6	0	2	4	T
comp840_c0	1087	A	W	275	172	0.3848	2	2	32	35	0.98	1	1	39	236	89	83	T
comp840_c0	1103	A	R	243	174	0.4173	2	2	35	34	0.98	1	1	36	207	82	92	G
comp840_c0	1115	C	S	200	155	0.4366	2	2	38	36	0.98	1	1	9	191	53	102	G
comp843_c0	241	T	Y	353	180	0.3377	2	2	38	38	0.98	1	1	114	239	152	28	C
comp843_c0	256	C	Y	293	202	0.4081	2	2	38	37	0.98	1	1	115	178	157	45	T
comp843_c0	259	G	S	261	220	0.4574	2	2	37	37	0.98	1	1	114	147	174	46	C
comp843_c0	265	T	W	221	262	0.5424	2	2	38	37	0.98	1	1	113	108	199	63	A
comp843_c0	291	G	K	331	161	0.3272	2	2	37	37	0.98	1	1	237	94	85	76	T
comp849_c0	63	T	K	71	62	0.4662	2	2	37	37	0.98	1	1	44	27	35	27	G
comp849_c0	120	T	Y	120	112	0.4828	2	2	37	38	0.98	1	1	49	71	48	64	C
comp849_c0	130	T	K	116	109	0.4844	2	2	37	38	0.98	1	1	44	72	40	69	G
comp849_c0	150	C	M	125	111	0.4703	2	2	37	37	0.98	1	1	60	65	43	68	A
comp849_c0	184	C	S	121	56	0.3164	2	2	37	37	0.98	1	1	56	65	20	36	G
comp849_c0	1220	T	W	5	4	0.4444	2	2	37	35	0.98	1	1	3	2	2	2	A
comp854_c0	1799	G	S	60	165	0.7333	2	2	37	36	0.98	1	1	36	24	86	79	C
comp861_c1	1907	G	R	17	12	0.4138	2	2	36	33	0.98	1	1	13	4	4	8	A
comp863_c0	196	A	M	34	34	0.5	2	2	36	37	0.98	1	1	28	6	26	8	C
comp863_c0	263	C	Y	58	116	0.6667	2	2	38	38	0.98	1	1	38	20	101	15	T
comp863_c0	509	T	Y	69	31	0.31	2	2	32	28	0.98	1	1	60	9	29	2	C
comp866_c2	35	T	G	3	13	0.8125	2	2	40	37	0.98	1	1	1	2	12	1	G
comp86_c0	582	G	A	360	1205	0.77	2	2	38	37	0.98	1	1	138	222	478	727	A
comp870_c0	1381	C	M	4	5	0.5556	1	2	41	38	0.98	1	1	0	4	3	2	A
comp870_c0	1388	G	R	4	5	0.5556	1	2	40	40	0.98	1	1	0	4	3	2	A
comp870_c0	1391	A	W	4	5	0.5556	1	2	39	39	0.98	1	1	0	4	3	2	T
comp873_c0	158	T	K	36	21	0.3684	2	2	36	35	0.98	1	1	16	20	6	15	G
comp882_c1	1207	A	W	25	66	0.7253	1	2	40	36	0.98	1	1	25	0	19	47	T
comp882_c1	1210	A	R	25	56	0.6914	1	2	40	37	0.98	1	1	25	0	18	38	G
comp882_c1	1219	C	Y	54	48	0.4706	1	2	38	37	0.98	1	1	54	0	15	33	T
comp882_c1	1228	T	W	63	36	0.3636	2	2	38	33	0.98	1	1	61	2	9	27	A
comp887_c0	1075	T	A	29	101	0.7769	2	2	39	37	0.98	1	1	28	1	50	51	A
comp887_c0	1090	C	Y	57	80	0.5839	2	2	37	36	0.98	1	1	56	1	44	36	T
comp887_c0	1106	A	W	67	77	0.5347	2	2	39	36	0.98	1	1	65	2	43	34	T
comp887_c0	1120	G	S	101	57	0.3608	2	2	38	35	0.98	1	1	89	12	15	42	C
comp892_c0	1864	G	K	184	105	0.3633	2	2	38	38	0.98	1	1	108	76	99	6	T
comp892_c0	1867	C	Y	184	106	0.3655	2	2	38	39	0.98	1	1	108	76	100	6	T
comp892_c0	1883	A	R	173	127	0.4233	2	2	34	38	0.98	1	1	85	88	102	25	G
comp892_c0	1885	C	Y	170	131	0.4352	2	2	39	38	0.98	1	1	80	90	106	25	T
comp892_c0	1888	T	W	173	128	0.4252	2	2	39	38	0.98	1	1	83	90	103	25	A
comp892_c0	1922	T	W	189	149	0.4408	2	2	38	37	0.98	1	1	125	64	82	67	A
comp892_c0	1926	A	R	189	141	0.4273	2	2	39	38	0.98	1	1	119	70	82	59	G
comp892_c0	1927	A	R	218	113	0.3414	2	2	39	37	0.98	1	1	147	71	54	59	G
comp892_c0	1929	C	M	187	141	0.4299	2	2	38	38	0.98	1	1	113	74	82	59	A
comp892_c0	1932	T	Y	187	145	0.4367	2	2	38	37	0.98	1	1	107	80	82	63	C
comp896_c1	849	A	R	37	28	0.4308	2	2	35	39	0.98	1	1	12	25	27	1	G
comp896_c1	868	G	R	37	53	0.5889	2	2	35	37	0.98	1	1	5	32	48	5	A
comp896_c1	874	A	R	33	53	0.6163	2	2	35	38	0.98	1	1	4	29	45	8	G
comp896_c1	880	C	S	29	55	0.6548	1	2	35	38	0.98	1	1	0	29	46	9	G
comp896_c1	918	T	C	21	71	0.7717	1	2	38	35	0.98	1	1	0	21	46	25	C
comp89_c0	75	A	R	1159	1061	0.4779	2	2	35	36	0.98	1	1	439	720	413	648	G
comp89_c0	180	G	S	1144	1138	0.4987	2	2	36	36	0.98	1	1	536	608	515	623	C
comp89_c0	193	C	Y	1242	922	0.4261	2	2	35	36	0.98	1	1	617	625	440	482	T
comp89_c0	269	G	R	1047	1479	0.5855	2	2	36	36	0.98	1	1	524	523	812	667	A
comp89_c0	390	G	S	747	792	0.5146	2	2	38	36	0.98	1	1	89	658	205	587	C
comp89_c0	428	T	W	489	333	0.4051	2	2	37	35	0.98	1	1	47	442	11	322	A
comp89_c0	429	G	S	489	337	0.408	2	2	38	38	0.98	1	1	47	442	11	326	C
comp902_c0	985	T	Y	5	7	0.5833	1	2	39	36	0.98	1	1	5	0	3	4	C
comp902_c0	1161	T	Y	6	4	0.4	1	2	38	38	0.98	1	1	0	6	3	1	C
comp911_c0	282	G	R	234	125	0.3482	2	2	37	36	0.98	1	1	146	88	66	59	A
comp911_c0	1763	C	Y	55	36	0.3956	2	2	34	33	0.98	1	1	46	9	26	10	T
comp918_c0	1036	G	R	40	42	0.5122	2	2	34	26	0.98	1	1	14	26	30	12	A
comp91_c0	508	G	C	1	1005	0.999	1	2	34	36	0.98	1	1	0	1	375	630	C
comp91_c0	1009	G	S	70	126	0.6429	2	2	36	36	0.98	1	1	68	2	56	70	C
comp925_c0	39	A	M	59	50	0.4587	2	2	37	37	0.98	1	1	46	13	40	10	C
comp925_c0	98	G	K	158	129	0.4495	2	2	35	36	0.98	1	1	112	46	99	30	T
comp925_c0	101	C	M	167	129	0.4358	2	2	35	36	0.98	1	1	121	46	99	30	A
comp925_c0	155	G	R	195	85	0.3036	2	2	36	35	0.98	1	1	85	110	45	40	A
comp925_c0	232	T	A	29	162	0.8482	2	2	36	35	0.98	1	1	3	26	81	81	A
comp925_c0	261	T	C	18	147	0.8909	2	2	36	35	0.98	1	1	2	16	71	76	C
comp925_c0	290	G	C	10	176	0.9462	2	2	37	36	0.98	1	1	1	9	75	101	C
comp927_c0	2374	C	Y	8	8	0.5	2	2	37	32	0.98	1	1	3	5	2	6	T
comp927_c0	2379	T	K	8	8	0.5	2	2	36	33	0.98	1	1	3	5	2	6	G
comp931_c0	731	G	K	39	74	0.6549	2	2	38	38	0.98	1	1	38	1	12	62	T
comp931_c0	743	T	W	53	67	0.5583	2	2	38	38	0.98	1	1	50	3	10	57	A
comp931_c0	749	A	R	56	64	0.5333	2	2	38	38	0.98	1	1	50	6	10	54	G
comp931_c0	763	C	Y	83	51	0.3806	2	2	38	37	0.98	1	1	77	6	4	47	T
comp931_c0	764	A	R	86	49	0.363	2	2	38	38	0.98	1	1	78	8	2	47	G
comp935_c0	661	T	Y	53	23	0.3026	2	2	31	35	0.98	1	1	31	22	15	8	C
comp935_c0	703	C	Y	56	25	0.3086	2	2	34	35	0.98	1	1	28	28	15	10	T
comp935_c0	760	C	Y	51	26	0.3377	2	2	35	36	0.98	1	1	18	33	10	16	T
comp935_c0	790	C	Y	44	26	0.3714	2	2	36	36	0.98	1	1	14	30	12	14	T
comp935_c0	818	G	R	47	31	0.3974	2	2	36	35	0.98	1	1	22	25	15	16	A
comp937_c1	687	G	S	8	10	0.5556	2	2	37	36	0.98	1	1	5	3	9	1	C
comp937_c1	689	A	R	8	10	0.5556	2	2	36	35	0.98	1	1	5	3	9	1	G
comp937_c1	723	C	Y	6	6	0.5	2	2	34	31	0.98	1	1	4	2	4	2	T
comp937_c1	1029	C	Y	26	13	0.3333	2	2	36	35	0.98	1	1	18	8	12	1	T
comp937_c1	1032	C	S	26	13	0.3333	2	2	36	35	0.98	1	1	18	8	12	1	G
comp937_c1	1038	C	Y	26	12	0.3158	2	2	35	34	0.98	1	1	17	9	11	1	T
comp937_c1	1050	C	S	24	11	0.3143	2	2	34	34	0.98	1	1	14	10	8	3	G
comp937_c1	1328	A	R	247	107	0.3023	2	2	36	36	0.98	1	1	151	96	65	42	G
comp937_c1	1339	C	Y	232	104	0.3095	2	2	37	37	0.98	1	1	146	86	67	37	T
comp937_c1	1450	G	S	181	104	0.3649	2	2	38	38	0.98	1	1	63	118	52	52	C
comp937_c1	1459	G	R	186	107	0.3652	2	2	37	37	0.98	1	1	65	121	49	58	A
comp937_c1	1476	G	R	152	104	0.4062	2	2	38	37	0.98	1	1	62	90	43	61	A
comp937_c1	1484	T	Y	150	104	0.4094	2	2	35	38	0.98	1	1	65	85	37	67	C
comp937_c1	1488	A	R	146	96	0.3967	2	2	37	38	0.98	1	1	64	82	39	57	G
comp937_c1	1521	G	K	131	96	0.4229	2	2	36	37	0.98	1	1	68	63	33	63	T
comp937_c1	1533	A	R	117	91	0.4375	2	2	37	37	0.98	1	1	71	46	42	49	G
comp937_c1	1545	C	Y	131	95	0.4204	2	2	36	36	0.98	1	1	76	55	50	45	T
comp937_c1	1623	C	Y	174	78	0.3095	2	2	36	35	0.98	1	1	95	79	44	34	T
comp937_c1	1629	C	Y	176	81	0.3152	2	2	36	36	0.98	1	1	96	80	44	37	T
comp937_c1	1701	T	Y	100	65	0.3939	2	2	36	38	0.98	1	1	37	63	14	51	C
comp939_c1	42	C	T	1	14	0.9333	1	2	30	36	0.98	1	1	0	1	9	5	T
comp939_c1	43	T	C	1	14	0.9333	1	2	38	36	0.98	1	1	0	1	9	5	C
comp939_c1	44	G	A	1	14	0.9333	1	2	30	36	0.98	1	1	0	1	9	5	A
comp939_c1	45	G	A	1	14	0.9333	1	2	34	36	0.98	1	1	0	1	9	5	A
comp944_c1	3861	C	Y	7	4	0.3636	2	2	34	35	0.98	1	1	4	3	2	2	T
comp947_c0	1862	G	R	4	8	0.6667	2	2	34	35	0.98	1	1	2	2	6	2	A
comp947_c0	2094	T	Y	10	5	0.3333	2	2	39	37	0.98	1	1	8	2	4	1	C
comp947_c0	2102	A	W	10	6	0.375	2	2	38	38	0.98	1	1	8	2	4	2	T
comp947_c0	3530	T	W	27	32	0.5424	2	2	36	37	0.98	1	1	11	16	13	19	A
comp947_c0	3533	A	R	30	32	0.5161	2	2	38	39	0.98	1	1	14	16	13	19	G
comp947_c0	3554	C	Y	41	25	0.3788	2	2	37	37	0.98	1	1	24	17	11	14	T
comp947_c0	3572	A	R	35	18	0.3396	2	2	36	33	0.98	1	1	24	11	9	9	G
comp947_c0	3888	A	R	7	5	0.4167	2	2	37	32	0.98	1	1	2	5	1	4	G
comp948_c0	122	C	Y	8	12	0.6	1	2	38	37	0.98	1	1	8	0	8	4	T
comp948_c0	341	C	M	328	203	0.3823	2	2	36	37	0.98	1	1	174	154	96	107	A
comp948_c0	431	G	S	326	230	0.4137	2	2	37	37	0.98	1	1	180	146	135	95	C
comp948_c0	486	T	W	337	253	0.4288	2	2	36	37	0.98	1	1	164	173	139	114	A
comp948_c0	497	C	S	305	245	0.4455	2	2	37	37	0.98	1	1	126	179	115	130	G
comp948_c0	550	G	R	307	255	0.4537	2	2	35	37	0.98	1	1	159	148	132	123	A
comp948_c0	1505	C	Y	205	96	0.3189	2	2	37	38	0.98	1	1	88	117	50	46	T
comp969_c0	257	T	Y	135	72	0.3478	2	2	36	37	0.98	1	1	94	41	67	5	C
comp969_c0	671	T	C	20	149	0.8817	2	2	37	37	0.98	1	1	19	1	66	83	C
comp980_c0	42	A	R	84	133	0.6129	2	2	36	38	0.98	1	1	24	60	78	55	G
comp980_c0	48	C	Y	93	135	0.5921	2	2	37	39	0.98	1	1	32	61	80	55	T
comp980_c0	87	G	R	150	148	0.4966	2	2	38	38	0.98	1	1	81	69	57	91	A
comp980_c0	135	A	G	47	143	0.7526	2	2	36	37	0.98	1	1	17	30	62	81	G
comp980_c0	593	T	G	4	132	0.9706	1	2	40	38	0.98	1	1	0	4	57	75	G
comp980_c0	627	C	A	4	134	0.971	1	2	40	37	0.98	1	1	0	4	58	76	A
comp980_c0	629	C	T	4	134	0.971	1	2	38	38	0.98	1	1	0	4	58	76	T
comp980_c0	632	A	T	4	138	0.9718	1	2	38	38	0.98	1	1	0	4	62	76	T
comp980_c0	637	A	G	4	130	0.9701	1	2	37	37	0.98	1	1	0	4	56	74	G
comp980_c0	644	A	T	2	106	0.9815	1	2	40	36	0.98	1	1	0	2	39	67	T
comp980_c0	779	A	G	0	192	1	0	2	0	36	0.98	0	1	0	0	91	101	G
comp980_c0	1068	T	C	0	250	1	0	2	0	37	0.98	0	1	0	0	93	157	C
comp980_c0	1134	T	C	0	231	1	0	2	0	37	0.98	0	1	0	0	124	107	C
comp980_c0	1320	C	M	22	59	0.7284	1	2	38	35	0.98	1	1	22	0	11	48	A
comp980_c0	1326	A	R	30	45	0.6	1	2	38	34	0.98	1	1	30	0	11	34	G
comp980_c0	1333	C	S	43	35	0.4487	2	2	38	37	0.98	1	1	39	4	9	26	G
comp980_c0	1336	C	Y	46	35	0.4321	2	2	38	36	0.98	1	1	41	5	9	26	T
comp980_c0	1341	C	M	48	32	0.4	2	2	38	37	0.98	1	1	41	7	2	30	A
comp980_c0	2050	G	C	0	14	1	0	2	0	34	0.98	0	1	0	0	13	1	C
comp984_c0	495	T	W	264	222	0.4568	2	2	34	32	0.98	1	1	151	113	119	103	A
comp984_c0	735	G	R	343	286	0.4547	2	2	36	36	0.98	1	1	187	156	143	143	A
comp984_c0	1190	G	S	216	198	0.4783	2	2	36	36	0.98	1	1	75	141	68	130	C
comp984_c0	1236	C	S	190	183	0.4906	2	2	36	36	0.98	1	1	102	88	91	92	G
comp984_c0	1294	C	S	164	175	0.5162	2	2	36	36	0.98	1	1	54	110	48	127	G
comp98_c0	697	A	W	8	10	0.5556	1	2	33	33	0.98	1	1	0	8	3	7	T
comp98_c0	701	C	M	7	10	0.5882	1	2	39	34	0.98	1	1	0	7	3	7	A
comp991_c0	1720	A	R	107	66	0.3815	2	2	37	37	0.98	1	1	40	67	65	1	G
comp991_c0	1746	T	Y	117	223	0.6559	2	2	37	38	0.98	1	1	47	70	217	6	C
comp991_c0	1783	T	C	79	272	0.7749	2	2	35	37	0.98	1	1	65	14	239	33	C
comp991_c0	1791	C	T	79	260	0.767	2	2	37	37	0.98	1	1	60	19	200	60	T
comp991_c0	1797	A	C	79	293	0.7876	2	2	38	37	0.98	1	1	60	19	197	96	C
comp995_c0	303	G	K	84	120	0.5882	2	2	34	38	0.98	1	1	40	44	12	108	T
comp995_c0	312	A	R	90	58	0.3919	2	2	35	39	0.98	1	1	41	49	5	53	G
comp995_c0	314	T	Y	91	57	0.3851	2	2	33	39	0.98	1	1	42	49	5	52	C
comp996_c0	356	G	R	50	54	0.5192	2	2	37	38	0.98	1	1	10	40	52	2	A
comp996_c0	372	T	Y	40	65	0.619	2	2	39	38	0.98	1	1	2	38	58	7	C
comp996_c0	395	A	R	31	83	0.7281	1	2	39	37	0.98	1	1	0	31	72	11	G
comp996_c0	396	T	Y	32	86	0.7288	1	2	38	37	0.98	1	1	0	32	75	11	C
comp996_c0	558	G	R	108	79	0.4225	2	2	36	36	0.98	1	1	44	64	59	20	A
comp996_c0	561	G	K	101	82	0.4481	2	2	34	37	0.98	1	1	46	55	60	22	T
comp996_c0	564	C	M	100	82	0.4505	2	2	36	38	0.98	1	1	45	55	60	22	A
comp996_c0	582	A	R	92	129	0.5837	2	2	37	37	0.98	1	1	30	62	79	50	G
comp996_c0	600	G	K	82	164	0.6667	2	2	37	37	0.98	1	1	18	64	101	63	T
comp2004_c0	355	G	R	6	5	0.4545	2	2	34	37	0.98	1	1	2	4	3	2	A
comp2004_c0	2437	A	R	8	4	0.3333	2	2	36	36	0.98	1	1	5	3	1	3	G
comp2008_c0	355	A	G	9	34	0.7907	1	2	37	36	0.98	1	1	9	0	21	13	G
comp2008_c0	358	A	R	11	32	0.7442	1	2	37	36	0.98	1	1	11	0	21	11	G
comp2008_c0	367	C	Y	13	26	0.6667	1	2	39	35	0.98	1	1	13	0	18	8	T
comp2008_c0	370	A	R	13	25	0.6579	1	2	39	35	0.98	1	1	13	0	17	8	G
comp2008_c0	378	A	R	15	17	0.5312	1	2	37	35	0.98	1	1	15	0	13	4	G
comp2019_c0	562	G	R	179	86	0.3245	2	2	37	37	0.98	1	1	108	71	50	36	A
comp2019_c0	596	A	R	165	125	0.431	2	2	37	38	0.98	1	1	92	73	81	44	G
comp2019_c0	689	A	R	159	164	0.5077	2	2	36	37	0.98	1	1	61	98	68	96	G
comp2019_c0	716	G	R	154	154	0.5	2	2	37	38	0.98	1	1	63	91	77	77	A
comp2019_c0	782	T	Y	145	90	0.383	2	2	36	38	0.98	1	1	87	58	43	47	C
comp2019_c0	797	C	Y	155	85	0.3542	2	2	37	37	0.98	1	1	88	67	44	41	T
comp2019_c0	815	G	R	134	83	0.3825	2	2	38	38	0.98	1	1	68	66	39	44	A
comp2019_c0	820	T	Y	144	88	0.3793	2	2	37	37	0.98	1	1	65	79	41	47	C
comp2019_c0	824	T	Y	142	79	0.3575	2	2	38	38	0.98	1	1	65	77	38	41	C
comp2019_c0	849	T	W	140	87	0.3833	2	2	37	39	0.98	1	1	67	73	38	49	A
comp2019_c0	877	G	K	135	68	0.335	2	2	37	38	0.98	1	1	51	84	30	38	T
comp2019_c0	882	A	W	130	65	0.3333	2	2	37	38	0.98	1	1	50	80	29	36	T
comp2019_c0	887	A	R	128	67	0.3436	2	2	37	37	0.98	1	1	48	80	25	42	G
comp2019_c0	899	C	Y	128	75	0.3695	2	2	38	37	0.98	1	1	50	78	33	42	T
comp2019_c0	1001	G	K	77	75	0.4934	2	2	36	35	0.98	1	1	31	46	50	25	T
comp2019_c0	1005	G	K	73	65	0.471	2	2	36	35	0.98	1	1	25	48	44	21	T
comp2019_c0	1009	T	W	70	62	0.4697	2	2	33	35	0.98	1	1	27	43	44	18	A
comp2019_c0	1010	G	R	72	62	0.4627	2	2	35	35	0.98	1	1	29	43	44	18	A
comp2019_c0	1018	T	Y	73	54	0.4252	2	2	35	36	0.98	1	1	29	44	24	30	C
comp2019_c0	1031	G	R	77	69	0.4726	2	2	35	35	0.98	1	1	27	50	22	47	A
comp2020_c0	904	T	K	4	5	0.5556	1	2	37	34	0.98	1	1	0	4	3	2	G
comp2020_c0	919	C	T	4	14	0.7778	1	2	37	38	0.98	1	1	0	4	8	6	T
comp2020_c0	946	A	G	3	27	0.9	2	2	35	38	0.98	1	1	2	1	19	8	G
comp2025_c0	715	A	R	75	41	0.3534	2	2	34	36	0.98	1	1	30	45	28	13	G
comp2025_c0	821	C	Y	72	36	0.3333	2	2	36	36	0.98	1	1	34	38	14	22	T
comp2025_c0	1888	G	A	70	222	0.7603	2	2	37	36	0.98	1	1	21	49	82	140	A
comp2025_c0	1898	G	T	63	210	0.7692	2	2	38	37	0.98	1	1	17	46	68	142	T
comp2027_c0	1049	T	Y	77	77	0.5	2	2	35	36	0.98	1	1	37	40	49	28	C
comp2027_c0	1768	A	R	29	16	0.3556	2	2	35	34	0.98	1	1	23	6	10	6	G
comp2039_c0	1654	G	C	3	79	0.9634	1	2	40	37	0.98	1	1	3	0	30	49	C
comp2039_c0	1690	G	A	3	53	0.9464	1	2	35	35	0.98	1	1	3	0	24	29	A
comp2044_c0	440	A	R	89	39	0.3047	2	2	34	34	0.98	1	1	50	39	34	5	G
comp2044_c0	557	A	R	118	61	0.3408	2	2	35	36	0.98	1	1	43	75	25	36	G
comp2046_c0	96	A	R	25	21	0.4565	2	2	35	36	0.98	1	1	19	6	16	5	G
comp2046_c0	1172	C	S	42	22	0.3438	2	2	38	38	0.98	1	1	28	14	12	10	G
comp2046_c0	1226	G	S	44	21	0.3231	2	2	36	36	0.98	1	1	24	20	13	8	C
comp2064_c0	4336	A	R	129	65	0.3351	2	2	34	35	0.98	1	1	32	97	26	39	G
comp2067_c0	136	G	R	28	40	0.5882	2	2	38	38	0.98	1	1	16	12	27	13	A
comp2067_c0	481	G	R	21	29	0.58	2	2	35	34	0.98	1	1	15	6	17	12	A
comp2067_c0	800	G	R	33	28	0.459	2	2	37	37	0.98	1	1	10	23	11	17	A
comp2067_c0	2922	G	R	39	23	0.371	2	2	37	38	0.98	1	1	17	22	8	15	A
comp2069_c0	177	G	S	168	72	0.3	2	2	34	34	0.98	1	1	103	65	61	11	C
comp2069_c0	178	G	S	168	72	0.3	2	2	35	34	0.98	1	1	103	65	61	11	C
comp2069_c0	186	C	Y	167	72	0.3013	2	2	34	33	0.98	1	1	101	66	58	14	T
comp2069_c0	216	T	Y	72	120	0.625	2	2	30	35	0.98	1	1	14	58	12	108	C
comp2069_c0	220	C	M	77	115	0.599	2	2	34	35	0.98	1	1	16	61	10	105	A
comp2069_c0	240	C	Y	104	80	0.4348	2	2	35	26	0.98	1	1	22	82	6	74	T
comp2069_c0	244	T	Y	104	85	0.4497	2	2	29	36	0.98	1	1	22	82	6	79	C
comp2069_c0	247	C	S	109	96	0.4683	2	2	34	34	0.98	1	1	22	87	5	91	G
comp2069_c0	472	T	Y	14	19	0.5758	2	2	34	37	0.98	1	1	12	2	17	2	C
comp2069_c0	473	G	R	16	19	0.5429	2	2	35	37	0.98	1	1	12	4	17	2	A
comp2069_c0	474	T	Y	16	19	0.5429	2	2	34	37	0.98	1	1	12	4	17	2	C
comp2069_c0	477	G	S	18	23	0.561	2	2	33	36	0.98	1	1	13	5	21	2	C
comp2069_c0	480	C	S	18	24	0.5714	2	2	33	36	0.98	1	1	13	5	22	2	G
comp2080_c0	223	A	R	105	69	0.3966	2	2	36	39	0.98	1	1	72	33	68	1	G
comp2080_c0	227	A	R	99	75	0.431	2	2	37	39	0.98	1	1	74	25	74	1	G
comp2080_c0	232	A	W	99	80	0.4469	2	2	38	38	0.98	1	1	70	29	79	1	T
comp2080_c0	244	T	W	99	90	0.4762	2	2	37	39	0.98	1	1	61	38	89	1	A
comp2080_c0	256	A	W	96	96	0.5	2	2	36	38	0.98	1	1	50	46	89	7	T
comp2080_c0	259	G	R	96	85	0.4696	2	2	38	38	0.98	1	1	46	50	78	7	A
comp2080_c0	265	T	Y	92	93	0.5027	2	2	38	38	0.98	1	1	43	49	73	20	C
comp2080_c0	268	T	Y	92	99	0.5183	2	2	39	37	0.98	1	1	38	54	78	21	C
comp2080_c0	298	T	Y	143	76	0.347	2	2	36	37	0.98	1	1	88	55	32	44	C
comp2080_c0	307	C	Y	136	62	0.3131	2	2	37	37	0.98	1	1	75	61	10	52	T
comp2080_c0	309	C	Y	135	61	0.3112	2	2	37	36	0.98	1	1	74	61	9	52	T
comp2087_c0	993	T	K	49	27	0.3553	2	2	36	34	0.98	1	1	20	29	15	12	G
comp2089_c0	337	G	K	11	27	0.7105	2	2	38	38	0.98	1	1	3	8	6	21	T
comp2093_c0	1835	A	W	3	6	0.6667	1	2	37	37	0.98	1	1	3	0	1	5	T
comp2094_c0	116	C	S	29	21	0.42	2	2	37	39	0.98	1	1	28	1	20	1	G
comp2094_c0	152	T	Y	78	34	0.3036	2	2	39	38	0.98	1	1	71	7	31	3	C
comp2094_c0	461	A	R	121	73	0.3763	2	2	36	36	0.98	1	1	56	65	37	36	G
comp2094_c0	479	A	R	116	63	0.352	2	2	36	36	0.98	1	1	52	64	34	29	G
comp2100_c0	1525	G	R	8	4	0.3333	2	2	38	37	0.98	1	1	1	7	2	2	A
comp2116_c0	13	T	W	4	5	0.5556	2	2	35	34	0.98	1	1	3	1	2	3	A
comp2116_c0	48	G	R	12	9	0.4286	2	2	38	37	0.98	1	1	7	5	3	6	A
comp2116_c0	211	T	Y	43	33	0.4342	2	2	37	37	0.98	1	1	28	15	22	11	C
comp2116_c0	300	T	K	52	28	0.35	2	2	38	38	0.98	1	1	22	30	4	24	G
comp2116_c0	310	A	R	51	24	0.32	2	2	38	39	0.98	1	1	22	29	4	20	G
comp2116_c0	348	A	W	31	17	0.3542	2	2	36	38	0.98	1	1	15	16	8	9	T
comp2116_c0	742	G	R	5	4	0.4444	2	2	36	38	0.98	1	1	2	3	3	1	A
comp2122_c0	1175	A	M	7	9	0.5625	1	2	38	36	0.98	1	1	7	0	8	1	C
comp2123_c0	1500	G	C	5	26	0.8387	2	2	35	35	0.98	1	1	4	1	16	10	C
comp2123_c0	1518	A	R	18	13	0.4194	2	2	35	35	0.98	1	1	7	11	7	6	G
comp2123_c0	4014	G	S	9	6	0.4	2	2	34	35	0.98	1	1	1	8	2	4	C
comp2123_c0	4023	G	S	9	8	0.4706	2	2	35	35	0.98	1	1	1	8	3	5	C
comp2123_c0	4047	G	S	10	10	0.5	2	2	37	35	0.98	1	1	1	9	3	7	C
comp2123_c0	4056	G	S	10	11	0.5238	2	2	38	36	0.98	1	1	1	9	3	8	C
comp2123_c0	4095	C	Y	13	8	0.381	2	2	35	35	0.98	1	1	1	12	5	3	T
comp2125_c0	1441	A	W	70	34	0.3269	2	2	38	37	0.98	1	1	26	44	17	17	T
comp2141_c0	1362	A	R	11	9	0.45	1	2	38	35	0.98	1	1	11	0	6	3	G
comp2141_c0	1375	C	Y	14	7	0.3333	1	2	39	35	0.98	1	1	14	0	5	2	T
comp2149_c0	1727	A	M	19	30	0.6122	2	2	36	36	0.98	1	1	2	17	29	1	C
comp2150_c0	1352	A	R	53	52	0.4952	2	2	39	37	0.98	1	1	2	51	42	10	G
comp2150_c0	1359	A	R	49	55	0.5288	2	2	38	37	0.98	1	1	2	47	39	16	G
comp2150_c0	1375	T	C	21	70	0.7692	2	2	37	38	0.98	1	1	2	19	48	22	C
comp2150_c0	1381	C	T	15	73	0.8295	2	2	36	38	0.98	1	1	2	13	44	29	T
comp2155_c0	1152	G	R	24	12	0.3333	2	2	35	36	0.98	1	1	13	11	9	3	A
comp2155_c0	1191	G	R	26	13	0.3333	2	2	37	32	0.98	1	1	9	17	6	7	A
comp2164_c0	1938	A	R	6	10	0.625	1	2	39	38	0.98	1	1	0	6	9	1	G
comp2164_c0	1941	C	S	6	10	0.625	1	2	40	39	0.98	1	1	0	6	9	1	G
comp2164_c0	1957	T	G	4	13	0.7647	1	2	36	37	0.98	1	1	0	4	12	1	G
comp2164_c0	1963	A	C	3	12	0.8	2	2	38	36	0.98	1	1	1	2	11	1	C
comp2168_c0	635	A	R	9	4	0.3077	2	2	34	34	0.98	1	1	6	3	3	1	G
comp2168_c0	1482	A	R	22	25	0.5319	2	2	37	35	0.98	1	1	4	18	13	12	G
comp2171_c0	13	A	G	0	8	1	0	2	0	34	0.98	0	1	0	0	4	4	G
comp2171_c0	18	A	G	0	9	1	0	2	0	34	0.98	0	1	0	0	4	5	G
comp2186_c0	168	A	M	5	11	0.6875	2	2	36	34	0.98	1	1	2	3	10	1	C
comp2186_c0	481	C	A	6	28	0.8235	1	2	38	35	0.98	1	1	0	6	1	27	A
comp2186_c0	490	C	T	5	31	0.8611	1	2	40	38	0.98	1	1	0	5	1	30	T
comp2190_c0	378	G	A	2	9	0.8182	1	2	38	34	0.98	1	1	0	2	7	2	A
comp2190_c0	390	G	C	1	12	0.9231	1	2	34	35	0.98	1	1	0	1	7	5	C
comp2191_c0	140	T	Y	26	16	0.381	2	2	38	38	0.98	1	1	18	8	12	4	C
comp2191_c0	301	G	R	118	99	0.4562	2	2	38	38	0.98	1	1	52	66	53	46	A
comp2191_c0	1350	G	R	14	16	0.5333	2	2	37	34	0.98	1	1	1	13	1	15	A
comp2200_c0	295	C	Y	19	24	0.5581	2	2	37	38	0.98	1	1	12	7	16	8	T
comp2207_c0	1461	C	S	17	22	0.5641	2	2	37	34	0.98	1	1	5	12	5	17	G
comp2207_c0	1469	A	M	16	26	0.619	2	2	35	32	0.98	1	1	5	11	2	24	C
comp2207_c0	1473	C	S	17	25	0.5952	2	2	35	33	0.98	1	1	6	11	1	24	G
comp2207_c0	1488	G	S	11	26	0.7027	2	2	33	35	0.98	1	1	5	6	1	25	C
comp2207_c0	1489	A	R	11	26	0.7027	2	2	29	34	0.98	1	1	5	6	1	25	G
comp2215_c0	1249	A	R	6	4	0.4	1	2	34	32	0.98	1	1	6	0	1	3	G
comp2216_c0	831	T	Y	4	5	0.5556	1	2	38	36	0.98	1	1	0	4	2	3	C
comp2221_c0	4226	G	K	15	7	0.3182	2	2	36	35	0.98	1	1	4	11	3	4	T
comp2221_c0	5645	C	M	6	4	0.4	2	2	37	29	0.98	1	1	2	4	2	2	A
comp2227_c0	1339	A	R	11	6	0.3529	2	2	39	36	0.98	1	1	6	5	3	3	G
comp2228_c0	460	G	C	2	6	0.75	1	2	38	32	0.98	1	1	2	0	4	2	C
comp2228_c0	475	C	M	9	13	0.5909	2	2	35	31	0.98	1	1	4	5	5	8	A
comp2228_c0	506	G	S	8	17	0.68	2	2	36	37	0.98	1	1	7	1	5	12	C
comp2228_c0	580	G	C	9	57	0.8636	2	2	34	37	0.98	1	1	4	5	52	5	C
comp2228_c0	581	T	C	9	58	0.8657	2	2	36	37	0.98	1	1	4	5	53	5	C
comp2228_c0	586	G	C	9	81	0.9	2	2	33	37	0.98	1	1	4	5	75	6	C
comp2229_c0	1086	A	G	2	9	0.8182	2	2	33	31	0.98	1	1	1	1	8	1	G
comp2233_c0	30	C	S	9	4	0.3077	2	2	39	37	0.98	1	1	8	1	3	1	G
comp2233_c0	90	G	S	20	12	0.375	2	2	36	39	0.98	1	1	13	7	7	5	C
comp2233_c0	97	T	K	20	12	0.375	2	2	36	38	0.98	1	1	12	8	7	5	G
comp2234_c1	889	C	S	27	40	0.597	2	2	36	35	0.98	1	1	16	11	11	29	G
comp2246_c0	2010	T	K	20	9	0.3103	2	2	36	39	0.98	1	1	10	10	8	1	G
comp2246_c0	2091	T	Y	13	11	0.4583	2	2	36	36	0.98	1	1	3	10	2	9	C
comp2249_c0	384	G	A	25	103	0.8047	2	2	36	35	0.98	1	1	9	16	52	51	A
comp2249_c0	404	C	T	37	139	0.7898	2	2	34	35	0.98	1	1	21	16	83	56	T
comp2260_c0	524	G	K	35	41	0.5395	2	2	38	37	0.98	1	1	10	25	7	34	T
comp2262_c0	1244	A	T	1	9	0.9	1	2	37	34	0.98	1	1	0	1	5	4	T
comp2262_c0	1256	A	G	0	10	1	0	2	0	37	0.98	0	1	0	0	5	5	G
comp2263_c0	715	A	W	16	18	0.5294	2	2	38	35	0.98	1	1	12	4	10	8	T
comp2263_c0	729	T	Y	23	15	0.3947	2	2	36	37	0.98	1	1	12	11	8	7	C
comp2263_c0	731	G	R	25	15	0.375	2	2	36	38	0.98	1	1	12	13	8	7	A
comp2263_c0	751	G	K	20	14	0.4118	2	2	34	36	0.98	1	1	6	14	4	10	T
comp2263_c0	978	T	Y	11	6	0.3529	2	2	39	39	0.98	1	1	6	5	3	3	C
comp2263_c0	1307	T	W	26	28	0.5185	2	2	36	36	0.98	1	1	17	9	20	8	A
comp2265_c0	6036	G	R	23	11	0.3235	2	2	35	39	0.98	1	1	14	9	3	8	A
comp2280_c0	220	T	Y	11	17	0.6071	2	2	37	39	0.98	1	1	6	5	7	10	C
comp2280_c0	298	T	W	14	24	0.6316	2	2	37	37	0.98	1	1	10	4	17	7	A
comp2290_c0	1062	T	K	10	14	0.5833	2	2	34	33	0.98	1	1	1	9	1	13	G
comp2290_c0	1070	G	R	6	16	0.7273	2	2	35	36	0.98	1	1	1	5	1	15	A
comp2291_c0	2607	C	Y	46	20	0.303	2	2	37	36	0.98	1	1	9	37	6	14	T
comp2295_c0	3145	A	R	154	73	0.3216	2	2	38	38	0.98	1	1	76	78	49	24	G
comp2295_c0	3171	C	S	92	144	0.6102	2	2	37	37	0.98	1	1	52	40	81	63	G
[truncated: 5,164 more rows]
