# Supplementary material for: Transcriptome analysis of colored calla lily (Zantedeschia rehmannii Engl.) by Illumina sequencing: de novo assembly, annotation and EST-SSR marker development
Source: PeerJ. 2016 Sep 1;4:e2378. doi: 10.7717/peerj.2378 (PMC5012260; doi:10.7717/peerj.2378)
Supplement: Table S6 [file peerj-04-2378-s007.xlsx]

## Sheet: Sheet1
Table S7 Primer sequences of 200 colored calla lily EST-SSRs used for marker validation.
Locus	Unigenes	Motif	Forward primer (5'-3')	Reverse primer (5'-3')	Size (bp)	Ta	Product type	Nr annotation	Organism
CallaRe001	comp10303_c0	(CT)10	CTGTAGCCGTTGACCGTTGC	GACCTCGCCGTGATGATGC	193	55.7	Non-specificity	hypothetical protein OsI_09752	Oryza sativa Indica Group
CallaRe002	comp1085_c0	(CTG)7	ATGGTGTAGGGGATGAGCG	ACCCGAGAAAGAGGCGGAGA	135	56.5	Non-specificity	PREDICTED: translocation protein SEC63 homolog	Vitis vinifera
CallaRe003	comp1087_c1	(GA)9	TGAGAAAATGGGCAGAGTG	GCAGAGCCTAGAGCAATACA	195	50.4	Non-specificity	hypothetical protein SORBIDRAFT_02g023210	Sorghum bicolor
CallaRe004	comp109_c2	(CAT)8	TCACATCCAACAGCACAGAA	TACGAGGCAGAAAGACAAAC	223	51	Non-specificity	hypothetical protein VITISV_015618	Vitis vinifera
CallaRe005	comp10909_c0	(CT)10	CTATGGAGGAACCCAGAAGT	CAACTGAAACGGAGGAGTG	200	53.1	Monomorphism	predicted protein	Populus trichocarpa
CallaRe006	comp1093_c0	(GT)10	CCACGCAACAAGTCCTACTCCA	ACCTCCACTGCTGACACCACGA	142	58.2	Monomorphism	putative nitrilase-associated protein	Sandersonia aurantiaca
CallaRe007	comp11088_c0	(CAAAC)5	TCGGTTTATTCTGGTTGGTT	CAGCTAGGGTGTTTACTATTCG	194	50	Non-specificity	PREDICTED: uncharacterized protein LOC100267948	Vitis vinifera
CallaRe008	comp11090_c0	(AG)7	TCCGACCAAAACACCCACA	TCAGCAATGCCCATCACCA	85	53	No products	Peptidylprolyl isomerase domain and WD repeat-containing protein 1 isoform 1	Theobroma cacao
CallaRe009	comp11090_c0	(AGC)5AT(AAG)7	AAAGCCAGTGGAGTTGTCA	ACGGTGCATGTAACTTTTCTCA	247	56.2	No products	Peptidylprolyl isomerase domain and WD repeat-containing protein 1 isoform 1	Theobroma cacao
CallaRe010	comp1111_c0	(CGG)8----(AG)6	TGCTGACACCCCGACCTGTT	TTCCTCCCCACCCACCATCT	192	59.6	No products	unnamed protein product	Vitis vinifera
CallaRe011	comp1134_c0	(CT)10	ACCGTCCGCTGCTCTTGTT	GCCGCTCTTCTGAGGAGATGTGA	114	54.3	Monomorphism	Os10g0545200	Oryza sativa Japonica Group
CallaRe012	comp11454_c0	(CT)8----(TTC)5	GGGACTTTCCTTGGTTTCT	GCTGATTACAGTGCGACCAT	242	52.9	Non-specificity	PREDICTED: BEL1-like homeodomain protein 4-like	Vitis vinifera
CallaRe013	comp1153_c0	(CCT)8	GATCGCCATCATCAGATCCA	GCAGAAGCAGACCCGTGAA	187	57.6	Monomorphism	PREDICTED: NADPH--cytochrome P450 reductase-like	Vitis vinifera
CallaRe014	comp1153_c0	(TGG)9	CACGCCAATCAACAACCATA	ATCTCCGCCGTCCTCACTAA	182	54.7	No products	PREDICTED: NADPH--cytochrome P450 reductase-like	Vitis vinifera
CallaRe015	comp11562_c0	(AAG)7	GGGTTTCCGCCAAGATTTCC	TACCGACAGCCCTCCACCA	298	60.6	Polymorphism	hypothetical protein ZEAMMB73_130714	Zea mays
CallaRe016	comp11579_c0	(GC)10	CCCGCCTTTCTATCTATCC	TGCTTTCTTTCGTGTTTGAC	141	56.7	Polymorphism	hypothetical protein CARUB_v100151920mg, partial	Capsella rubella
CallaRe017	comp1164_c0	(CTT)7	CCAGGATGTTGTAGGTGATG	GAGAAGGGAGGTAGGAGATAGA	184	53.9	Non-specificity	conserved hypothetical protein	Ricinus communis
CallaRe018	comp11978_c0	(AAAAG)5	CGACGACGCAGAGGAGGAAT	TTGCCCTATGGATGCGATGA	210	50.4	No products	Uncharacterized protein TCM_005902	Theobroma cacao
CallaRe019	comp12237_c0	(CTT)7	GGCTGCAAATGGGCGAAGA	GCCAGTCACTACATTGCAT	185	48.5	Non-specificity	hypothetical protein OsI_27934	Oryza sativa Indica Group
CallaRe020	comp12344_c0	(GAA)7	TGTCCCGCCATAGTTCCAA	GCAAGACGCCAACTTTTCC	287	56.9	Monomorphism	Protein farnesyltransferase subunit beta	Aegilops tauschii
CallaRe021	comp1238_c0	(TC)10	GATCCTCCCGGCGAGAAAT	GCCTCCAGCAACCCATCAT	226	57.6	No products	hypothetical protein OsI_20323	Oryza sativa Indica Group
CallaRe022	comp1271_c0	(TC)10	CAGTTGCCCATGATATGTAGC	GCACGGAAGTCACTGAACAC	248	56.1	No products	DEAD BOX RNA helicase RH15 - like protein	Arabidopsis thaliana
CallaRe023	comp1299_c0	(GA)11	GAGAAAGATAAGAGGGAGGGG	CCACAGGAAAGCAAACAGAA	191	54.1	No products	hypothetical protein PRUPE_ppa004220mg	Prunus persica
CallaRe024	comp13178_c0	(CA)11-----(TTC)5	TCCTCCCTCAAGCCTCACT	ACACCCCGTCCGATAAAGT	341	54.5	Non-specificity	predicted protein	Populus trichocarpa
CallaRe025	comp1355_c0	(AG)11--(AG)7	GAAGAAGAAGGCAAGAAGGGT	GGACGCTGGTTTTATACGC	219	55.9	No products	PREDICTED: protein GDAP2 homolog	Fragaria vesca subsp. vesca
CallaRe026	comp1355_c0	(AGA)5--(GCG)5	TGCAGCGAGGTTGGTGAAG	AAGGTGGCGAAGAAGAGGC	300	59.1	Monomorphism	PREDICTED: protein GDAP2 homolog	Fragaria vesca subsp. vesca
CallaRe027	comp1355_c0	(ACC)5	AGGCTGGAGTTCCTGTGGGA	AGATGCAGCGGAGGGAGTAC	193	59.2	Monomorphism	PREDICTED: protein GDAP2 homolog	Fragaria vesca subsp. vesca
CallaRe028	comp1356_c0	(CT)10	CATGAACGCAGCGTCCATCT	GCCTGCCAGTGGAAAAGATCT	164	53.5	Polymorphism	unknown	Picea sitchensis
CallaRe029	comp13565_c0	(ATCT)5AC(CTAT)5C(TA)10	CTGTCATCAAGTCGAGCATC	AGGGTCAATAAAGTGGAAGG	287	49.8	No products	uncharacterized protein LOC100305838	Glycine max
CallaRe030	comp1368_c0	(GT)8	AGTGGCATTTGCAGCACTT	GGTAGCATTTTATTAGGGGAC	290	48.9	Polymorphism	unnamed protein product	Vitis vinifera
CallaRe031	comp13868_c0	(TCGA)5	GCGACTGGTGGTAGCTCGTAA	CTTGGCTCGGGAAGAGGAAG	232	58	Polymorphism	Tetratricopeptide repeat (TPR)-like superfamily protein	Theobroma cacao
CallaRe032	comp13925_c0	(CTC)5	CGTGAACTCCATCCCGTCCT	GTCGTCGGCGCTGAAGAATA	145	57.5	Polymorphism	hypothetical protein PRUPE_ppa005060mg	Prunus persica
CallaRe033	comp1396_c0	(GA)10	GACCTTATCCCAAGCCTACCT	CCCGCGGTCTTTCTCTTTCT	154	53.3	Non-specificity	hypothetical protein CARUB_v100052991mg, partial	Capsella rubella
CallaRe034	comp1404_c0	(CGC)8	GAAGGGAGAAGGAGCAGAGA	GAGATGGGAATGAAGGGAGAA	234	57.6	Non-specificity	hypothetical protein PRUPE_ppa008341mg	Prunus persica
CallaRe035	comp14122_c0	(CGT)7	GCATTAACAACTTGACGCACTT	AACAACAGTAAGGAAGATGGC	183	52.9	No products	-------	-------
CallaRe036	comp14249_c0	(CT)7	TCTCCTTGCCCTTTGGTGC	CGACGAGATGAAGGTGGTATT	155	53.3	Polymorphism	hypothetical protein SORBIDRAFT_09g007400	Sorghum bicolor
CallaRe037	comp143_c0	(CTG)8	TGCGGCATGCACTTGTATCA	CCACCATCAACAGCTCCAAT	170	56.1	Non-specificity	PREDICTED: nucleolysin TIAR	Vitis vinifera
CallaRe038	comp1434_c0	(CCG)5--(CGC)5	TCCACTTGGTATCTCGGGTAG	GGCAAGGACGAGAAGAAGG	299	60.8	Non-specificity	PREDICTED: uncharacterized protein LOC101297429	Fragaria vesca subsp. vesca
CallaRe039	comp1434_c0	(AG)10	TTGTTGTCCTCCGCCTTCT	TCCGGGATGTCCATCGTCT	176	54.8	Non-specificity	PREDICTED: uncharacterized protein LOC101297429	Fragaria vesca subsp. vesca
CallaRe040	comp14447_c0	(AGG)5	CAGTCCTGGCACGTCGTGAAC	CCAACGGGTATGAACCTCTGG	263	62.1	Polymorphism	PREDICTED: uncharacterized protein LOC100823373	Brachypodium distachyon
CallaRe041	comp14447_c0	(TCC)5	CAGCCCGATCATGCCGATGT	GGTGGCTTCTGGAAAGAGGTT	271	60.8	Polymorphism	PREDICTED: uncharacterized protein LOC100823373	Brachypodium distachyon
CallaRe042	comp14447_c0	(CT)7	CTTCCCTTGGTCACTCGTCA	GAAAGGCTGAGCGCAGAAC	207	54.5	Polymorphism	PREDICTED: uncharacterized protein LOC100823373	Brachypodium distachyon
CallaRe043	comp14447_c0	(TC)10	CCTCTGGCGCTGCTGTTAA	GGGAGATTGAGAGACAGAA	238	51.3	Non-specificity	PREDICTED: uncharacterized protein LOC100823373	Brachypodium distachyon
CallaRe044	comp1472_c0	(CT)10	TCGCCATCGCTATGGAGTG	GAACTTTCGGGTGAAGCAG	202	55.2	No products	PREDICTED: phosphoinositide phospholipase C 4-like isoform 3	Vitis vinifera
CallaRe045	comp14788_c0	(CT)10--(CCT)5	TGGTAGCCCAGGGTCGTA	AGAGGGAGGGCAACTCGA	170	55.7	Non-specificity	PREDICTED: alpha-(1,4)-fucosyltransferase	Vitis vinifera
CallaRe046	comp15254_c0	(AT)10	GGTTAAACTGCACGCATTGT	AGATAGGGAGGAGGAAGACT	128	46.7	Non-specificity	-------	-------
CallaRe047	comp1527_c0	(ACC)9	CTACATGATGAGCCCCGACG	GAGAAGGAGGTGGAGCAGGA	162	57.2	Non-specificity	hypothetical protein OsJ_21435	Oryza sativa Japonica Group
CallaRe048	comp15490_c0	(CA)11	CCGACTGAGATACTTGGAA	TCAACTACTTGGCGCACAT	158	48.7	Non-specificity	-------	-------
CallaRe049	comp1557_c0	(AG)10	CATCTCCCTTCCCCTCCTCT	AAACCTCCTCGGCTCTTCG	187	55.1	Polymorphism	PREDICTED: probable LRR receptor-like serine/threonine-protein kinase At1g53440-like isoform X1	Setaria italica
CallaRe050	comp157_c0	(GGT)5--(GGTGGA)7	CTCAGACAACGGCAAGTAATA	GTCCAATGCTCAACCTCCT	274	55.2	Polymorphism	SAP domain-containing protein isoform 2	Theobroma cacao
CallaRe051	comp15759_c0	(GGA)5	TGCATTGGAAGGGAAAGGT	TTTCTCGGCCACCAACATC	268	58.1	Monomorphism	hypothetical protein SS1G_05600	Sclerotinia sclerotiorum 1980
CallaRe052	comp1580_c0	(CT)8	CCGGAAACCTTCCAACAAAA	AGCCAGCAAGCAGGATGACC	153	53	Monomorphism	PREDICTED: heavy metal-associated isoprenylated plant protein 26-like	Cucumis sativus
CallaRe053	comp1580_c0	(CTT)6	TCACAGCCATCACAGTCCAT	TGTAGGAGGAACCCTTGAAT	117	50.2	Monomorphism	PREDICTED: heavy metal-associated isoprenylated plant protein 26-like	Cucumis sativus
CallaRe054	comp16_c0	(GTGC)5A(TG)7--(GT)9(GA)11	CTCTTCGTTCCTGATTTCTCC	TCACCGTTCTCCTGCCTCT	173	54.6	No products	PREDICTED: probable peptide/nitrate transporter At5g62680	Vitis vinifera
CallaRe055	comp16062_c0	(AG)8--(GA)8	ATTTTAGTAGAAAGCAAGTCG	AAGAAAGTGGAAGGAGAAA	193	47.6	Polymorphism	PREDICTED: uncharacterized protein LOC100245017	Vitis vinifera
CallaRe056	comp1613_c0	(GAA)5	CCTCCATCCTGCTCTTGTC	TGCCTCCTCCTCCTATTTG	154	52.4	Polymorphism	PREDICTED: uncharacterized protein YwkD-like	Solanum lycopersicum
CallaRe057	comp1613_c0	(AT)11	CCAGCGTTGAATCATGCAT	TTGCTGCTTCCTGAGGTTGA	129	50.9	No products	PREDICTED: uncharacterized protein YwkD-like	Solanum lycopersicum
CallaRe058	comp16568_c0	(TTTG)5	TCAGGAGCGCAAGTCTAAT	ACAGGGGTTTCTGCTGTTC	268	49.2	No products	-------	-------
CallaRe059	comp1657_c2	(TA)10	GCAGCGATGTACATGACCAA	ACCTGATTGTGGCCAAGTGA	177	49.9	Non-specificity	unknown	Medicago truncatula
CallaRe060	comp1657_c2	(TG)7	CTCTTGTGTCCATCTGCTA	TCGGCGAGCATACTCTTCA	148	52.3	Non-specificity	unknown	Medicago truncatula
CallaRe061	comp1682_c0	(GCT)7	GTTGGAGGAGTTGATGCAGT	CTCTGCTTTCCGAAGTATCT	165	53.2	Polymorphism	Os06g0711600	Oryza sativa Japonica Group
CallaRe062	comp1685_c0	(AT)11	ACGTACGTAGTCTTGCTGT	CCACAGTACAGCATCATCTA	164	45.3	Non-specificity	hypothetical protein OsI_26891	Oryza sativa Indica Group
CallaRe063	comp1685_c0	(TC)9	ATCGCAGCGGCAGGTATTG	TGCAGGGTGGGCGTGTTAGA	289	58	Non-specificity	hypothetical protein OsI_26891	Oryza sativa Indica Group
CallaRe064	comp1713_c0	(CT)11	GCCTCTGTTCATCCATTCA	CCATCATCTTCACCGTCAC	288	56.4	Monomorphism	importin alpha	Citrus sinensis
CallaRe065	comp17199_c0	(CTG)6	AGGAAAGGCGAGCTGTAAC	TGTCTTGGGCACCATAAAA	130	53.5	Monomorphism	predicted protein	Populus trichocarpa
CallaRe066	comp17782_c0	(AC)10	CTGCCCATGAAACATTACC	ATTCTTCCTCCAAGCCAAA	299	49.2	Polymorphism	-------	-------
CallaRe067	comp1791_c0	(GGC)6	GAGGTGGAGGCGGAGGAAG	GCTCCAGCGACTCCTTCTC	175	59.9	No products	PREDICTED: probable calcium-binding protein CML36-like	Solanum lycopersicum
CallaRe068	comp17965_c0	(GCT)5-(GCT)7	GATGAGGACGAGGATGGTG	GAGCAGAGGGAGACGACAA	196	57.7	No products	-------	-------
CallaRe069	comp18090_c0	(ATC)7	TCGTCTCCCTCTGCTCGTCA	TCCGTCCCCTCATCACTTCC	277	57.4	No products	-------	-------
CallaRe070	comp1818_c0	(CTT)7	GATCCTTGTTCTTCCTATTTCC	AGTCGTGCTCCCTTTCTCG	192	53.1	Non-specificity	Os01g0303600	Oryza sativa Japonica Group
CallaRe071	comp18295_c0	(TG)10TCT(CA)7	TCTGCTACTTTGGTTGTTA	GATTTTATGATTTTGTGCC	280	47	Non-specificity	-------	-------
CallaRe072	comp1839_c0	(TGT)7TTCG(GGT)6	TACCTTCCCTCTCTGCTGTT	AGCTACTTCCTGCCTCTCAA	217	52.7	Monomorphism	amine oxidase flavin domain-containing protein	Oryza minuta
CallaRe073	comp1839_c0	(AGA)5	CGGCAAGTTCCTCAGCAGT	GGGGATGCCTATCCAAGAC	142	50.3	Non-specificity	amine oxidase flavin domain-containing protein	Oryza minuta
CallaRe074	comp1867_c0	(GA)8	CGAAGCCAGGTTTGGAGGT	GCTTGAAACATTTGTTGTAGCC	163	51.5	Non-specificity	unnamed protein product	Oryza sativa Japonica Group
CallaRe075	comp18701_c0	(GA)7	GGTAATGGCGGGACTTGGA	TCCTCTACTCCTTAGCACT	134	50.2	Polymorphism	-------	-------
CallaRe076	comp188_c0	(CT)9CA(CT)9	GGAGCGGGGAAGAGCAAAAGA	TGGTTCTGCAAAAGCACCTGA	216	54.1	Non-specificity	cysteine proteinase precursor	Sandersonia aurantiaca
CallaRe077	comp188_c0	(TC)10	GCTGTGGAGAAGCCATTAG	TCGAGTAGCCGTCAACGAG	250	54	No products	cysteine proteinase precursor	Sandersonia aurantiaca
CallaRe078	comp1884_c0	(TCC)5	TGCTGTCCACCCCTACAAT	ACCAGAAGGAGAAGCCAAA	170	55.2	Polymorphism	putative RNA recognition motif-containing protein, partial	Elaeis guineensis
CallaRe079	comp1884_c0	(CT)10	TGATGATGACGACGACGAT	TTCAACCCCACCAGCAATCT	230	56.6	Non-specificity	putative RNA recognition motif-containing protein, partial	Elaeis guineensis
CallaRe080	comp19348_c0	(CT)8	CCCTCCCATTCACTCACCT	GGATGGAAGACAGAGCAACTAA	174	52.3	Polymorphism	-------	-------
CallaRe081	comp198_c0	(AC)7--(AG)5	CGCCCATTTAATATGCTCTA	GGAGGAGAAAACCACCAAAC	286	51.4	Polymorphism	putative RNA recognition motif-containing protein, partial	Elaeis guineensis
CallaRe082	comp198_c0	(CAGCA)5	CCTTGGCCTTGCCCATTCT	GATATCCATCGTCTGCGAC	143	55.2	Polymorphism	putative RNA recognition motif-containing protein, partial	Elaeis guineensis
CallaRe083	comp1982_c0	(AGA)8	CCACTTCACAACCGCCAGTC	GTGGGATCGTTCTGCTCTGCTA	183	54.5	Non-specificity	PREDICTED: pre-mRNA-processing-splicing factor 8-like	Cucumis sativus
CallaRe084	comp1983_c0	(CTT)8	GTATTGGGTGAGGAGCAGCA	CGGCAGCCTGTATGGATCAA	168	52.6	Non-specificity	PREDICTED: nucleobase-ascorbate transporter 3	Vitis vinifera
CallaRe085	comp1996_c0	(AG)10	GGAGGTGGATAATACTGAT	CCCAACCCTGCGCTTTAAT	112	50.6	Non-specificity	PREDICTED: ferredoxin-dependent glutamate synthase 1, chloroplastic	Vitis vinifera
CallaRe086	comp2006_c0	(AG)8	CACCTGGCTTCGTTGGATT	CATCGCCATCTCTCTCTCTT	95	52.4	Non-specificity	PITH domain-containing protein	Theobroma cacao
CallaRe087	comp20225_c0	(CT)10	TCACGCACACTCTGTCTCGCT	GCAACTCATGTGGGCAGGAAT	134	54.9	Non-specificity	-------	-------
CallaRe088	comp20340_c0	(CT)5CAT(CT)4	TCCCGAGCACAGCGGACTT	TGTGGGCAGGAATCAGAGG	255	57.9	Non-specificity	unnamed protein product	Vitis vinifera
CallaRe089	comp20441_c0	(CCATC)5	TCCAGTTGGCCCATCAGTC	CTCTTTCGCTCGCTTCAGG	264	57.2	Polymorphism	-------	-------
CallaRe090	comp2106_c1	(CCA)7	CTTTGCCCACTTCATCTTCT	ACAGCTGGCAAGGTGGACTA	188	52.5	Polymorphism	PREDICTED: F-box protein At2g16365-like	Vitis vinifera
CallaRe091	comp2159_c0	(CT)11--(TC)5---(TC)4---(TC)5	TCGGGCTTGGTGGCGTAGAA	AAACAGGAGGGGACCTTGGA	270	55.3	Non-specificity	Os06g0664300	Oryza sativa Japonica Group
CallaRe092	comp21651_c0	(ACG)8	CGGATGCTGCACAAGGACGA	ACGATGACAGTGCCGGAGAA	155	58.6	Non-specificity	PREDICTED: uncharacterized protein LOC100266927	Vitis vinifera
CallaRe093	comp2197_c0	(AG)10(TG)4	AAGTAGAACCCCGGAGTCGC	GAAACCCCAATCCCCAAAAC	108	53.9	Monomorphism	predicted protein	Hordeum vulgare subsp. vulgare
CallaRe094	comp2230_c0	(TC)10	AGGAGCAGCGCCGCAATCA	CTCCCAGAAATGACGAACACC	167	57.6	No products	PREDICTED: probable xyloglucan endotransglucosylase/hydrolase protein 30-like	Cucumis sativus
CallaRe095	comp22648_c0	(AAC)7	CCCTCCGGCTTCTCCACCTT	CCGATCTGCGACCGACCAA	247	60	Polymorphism	Os01g0626400	Oryza sativa Japonica Group
CallaRe096	comp2269_c0	(CAC)7	CAAGCACTACATTTCTCCAACA	CCTCAGGGAGCAGAAGATACT	153	52.9	Non-specificity	unnamed protein product	Vitis vinifera
CallaRe097	comp2290_c0	(GA)5---(GGCGAT)5	GGCGACGATGTGGAGTACTT	GGCTTCCTCCCTCTCTCT	109	55	Polymorphism	PREDICTED: eukaryotic translation initiation factor 4E-1	Vitis vinifera
CallaRe098	comp23254_c0	(AT)10	ATGAGGTCGAGTTTCACAGT	GTTAGACCACTTCTTTGCCT	235	46.4	Non-specificity	-------	-------
CallaRe099	comp2370_c0	(AG)10	TACAGAAGGAGATGGAGCAGC	CCCTGAAGTTTCCAAAAGTCT	217	55.6	No products	Uncharacterized protein isoform 2	Theobroma cacao
CallaRe100	comp23771_c0	(GGAA)5	GGAGTGCTGGGCTGGCTTTGTT	TGGCTCGGTGCTGGTGTTGA	178	58.8	Polymorphism	-------	-------
CallaRe101	comp23771_c0	(AGC)5	TCCCCAAGTCCAAGTTCCA	CGCCCTCCGCAAATACAAA	278	55.1	Polymorphism	-------	-------
CallaRe102	comp2397_c0	(CAC)7	GTCCGTCGTGTCCGTCATCT	CCATTTCTACCAGCTTCCTT	111	54.8	No products	phosphoenolpyruvate carboxylase	Ricinus communis
CallaRe103	comp24255_c0	(TATG)5(TG)4	CTTCCGAACACTGTGGTGA	ACATGGCAGAATTGCTTGA	140	50.2	Monomorphism	-------	-------
CallaRe104	comp24586_c0	(ACC)7	CTCCTCGACCCCTCTTCTGA	GCCAATCCCACATTGACATG	181	55.3	No products	-------	-------
CallaRe105	comp246_c0	(TC)10	GATCCAGGGCCATAGTTCTT	CTTCCACTGCCAATCCTGT	128	53.8	Non-specificity	PREDICTED: 40S ribosomal protein S29-like	Vitis vinifera
CallaRe106	comp2490_c2	(TCC)7	ACCCTCCCGATGATCTCCTG	CGCTCTTCTAACCTGTCCACC	276	57.6	Non-specificity	Os05g0514300	Oryza sativa Japonica Group
CallaRe107	comp2490_c2	(TA)7	GGGTGGACAGGTTAGAAGAGC	AAGCAGGAGATGTATGTATGGTG	184	54.5	Polymorphism	Os05g0514300	Oryza sativa Japonica Group
CallaRe108	comp256_c0	(CT)8---(CT)10(AT)11	CACTGCCTTCCTCCTCCCA	TCGTCGCCCAGGTTCCAAA	317	53.7	No products	PREDICTED: inhibitor of trypsin and hageman factor-like	Cucumis sativus
CallaRe109	comp256_c0	(TA)7	CACGACTTCTTCCCTTCCAT	CAATTCCTGTCAACCAAACA	183	51.5	Polymorphism	PREDICTED: inhibitor of trypsin and hageman factor-like	Cucumis sativus
CallaRe110	comp2562_c0	(CCT)7	GTGACCATGTGGTTCAGCT	GGAGTTGATGACCACCTGT	215	54.7	Polymorphism	PREDICTED: fasciclin-like arabinogalactan protein 17	Vitis vinifera
CallaRe111	comp2587_c0	(CGG)8	GTCTGCTGTCAACAACTCAT	AGCACGACTCCTTCTTCTT	170	55.6	Non-specificity	PREDICTED: uncharacterized protein LOC101775394 isoform X1	Setaria italica
CallaRe112	comp26686_c0	(GT)11	ACAGGAGCTATGAGACCTG	ATCACTAAAATGCTTACACG	162	49.4	No products	-------	-------
CallaRe113	comp2714_c0	(CTC)8	CCCCTTCCCCTTACTCTTG	GTTCGCCTTTGTCCCTGTC	236	58.5	Non-specificity	squalene epoxidase	Chlorophytum borivilianum
CallaRe114	comp2764_c0	(TCT)5	GGAATGGAGGCACTTGGTT	GTGGAGGAGACTGGTTTGA	146	53	Non-specificity	PREDICTED: uncharacterized protein LOC100242745	Vitis vinifera
CallaRe115	comp2764_c0	(GCCTC)7	CCAGGAAATCAATACCAAGAG	AAGGAACAGGGACTGAACACT	129	49.1	Monomorphism	PREDICTED: uncharacterized protein LOC100242745	Vitis vinifera
CallaRe116	comp2770_c0	(TCG)5	CGCTTGGTTGCTTGCTTTGT	GAGTGGGGTGGGGTTGGATT	105	53.8	Non-specificity	PREDICTED: uncharacterized membrane protein At1g06890-like	Glycine max
CallaRe117	comp2770_c0	(TC)5--(AG)10	AACCCCACCCCACTCTGCC	CCTTGCGTGCTTCCTCCGA	217	58.9	Polymorphism	PREDICTED: uncharacterized membrane protein At1g06890-like	Glycine max
CallaRe118	comp27738_c0	(GT)10---(TG)6	ACAGATCGTCTCTTCTCCGCT	CTCTCCTCCACCGTCACTTC	279	54.4	Polymorphism	-------	-------
CallaRe119	comp2787_c0	(AG)10	CTCTTTAGCAATCCACAGT	GTTGCTGTCTCTCTCTATCT	122	48.4	Non-specificity	CW14 protein isoform 1	Theobroma cacao
CallaRe120	comp27889_c0	(GCT)7	CGAAACAGTGAGCTTAGGT	TTCCCAACTCGTGCCATGCT	171	53.4	Polymorphism	hypothetical protein OsI_08467	Oryza sativa Indica Group
CallaRe121	comp280_c0	(TA)11	CCTGAGCCACGGGTTCCTT	GACTCCCAAGCACGCGTAT	230	50.8	No products	Fatty acid hydroxylase superfamily isoform 1	Theobroma cacao
CallaRe122	comp281_c0	(AG)11	CCAGCTAGCCATAGGATACA	CCACCTCATCTACGACTACT	140	51.3	Non-specificity	xyloglucan endotransglucosylase/hydrolase	Diospyros kaki
CallaRe123	comp2860_c0	(AG)10	CAATGACCAGACCTGATAGA	AGCACCGATGAGTAGAAGAT	276	49.2	Non-specificity	-------	-------
CallaRe124	comp2876_c0	(TCC)8	ACTTCAACCTGGGCTCCTCGT	CTGGCCAGGGAAGCATATGT	132	55.5	Non-specificity	PREDICTED: vacuolar protein sorting-associated protein 41 homolog	Vitis vinifera
CallaRe125	comp2968_c0	(AG)10	CCTCTCTCTCCTGGCTTAT	CGTTGCTGTTGCCGCTGTT	159	54	Non-specificity	LOC100283439	Zea mays
CallaRe126	comp3016_c0	(TGG)7	CAGGAGCACCAACAGACTT	GCAGATTTGGAGCAGACTTA	170	56.7	Monomorphism	OSJNBa0068L06.9	Oryza sativa Japonica Group
CallaRe127	comp318_c0	(GAA)7---(GA)11	AAAGAGGACAAGGAGAGGAT	AGAACTCTGAGCTAGCAAT	203	49.3	No products	hypothetical protein OsI_37668	Oryza sativa Indica Group
CallaRe128	comp319_c2	(ATC)7	CATCCTTCTGCACTGTAGT	TAACCATGCAACGGCCAACGAT	242	47.1	Polymorphism	-------	-------
CallaRe129	comp3220_c0	(AG)10	CTAATGGGCACGCAGATGAT	TCGCGTCTCAGAGGAACAAT	176	55	Polymorphism	PREDICTED: nucleolysin TIAR [Vitis vinifera]	-------
CallaRe130	comp3400_c0	(CGG)6A(GGA)7	CAGAACCACCTCGGAGTATT	CCAGTTGACGTTCTTCAGGTT	181	57.1	No products	BSD domain-containing protein, putative	Theobroma cacao
CallaRe131	comp35726_c0	(TCTT)6	CCAATGATTCTAGCCTGTCT	AGAGATTTCCCAGTGAGCAA	217	46.7	Polymorphism	-------	-------
CallaRe132	comp365_c0	(AG)5---(AG)7	AGGAAGACGAGAAGGACGA	GGGCAGGTAAGATGAAGTGA	177	53.6	Non-specificity	PREDICTED: transaldolase isoform 1	Vitis vinifera
CallaRe133	comp36754_c0	(GA)8	CTCACCCTATGATACGAACT	AACACAGCAGTGGACACATCA	196	48.8	Monomorphism	-------	-------
CallaRe134	comp36866_c0	(GT)10	GGTGAACCACTTCTCCAGCT	CAAACCCCATCATTCCTCTT	207	52.7	No products	-------	-------
CallaRe135	comp3820_c0	(CT)10	GGGAAGTCTCGGACCATAT	TCACGAAACCCTAGCCTTGT	144	54.8	Polymorphism	-------	Prunus persica
CallaRe136	comp38544_c0	(TG)10	CACGCAGTAACCCTTCTCT	CACGAGGATGGAAAGAGAA	117	48.3	No products	-------	-------
CallaRe137	comp4128_c0	(CT)10	TAGGCAGGAAGTGCAGAGT	GCTGTCCATCTTCCCTTCT	226	50.7	Non-specificity	Zinc finger protein-related isoform 1	Theobroma cacao
CallaRe138	comp4252_c0	(CGT)7	TCTGGGAGTCCTTCTTGTA	GGAGCGGAGATATGGTTGAA	222	51.3	No products	unnamed protein product	Vitis vinifera
CallaRe139	comp42818_c0	(CAT)7	AACGTGTCTAGCCTGTGAT	ACAACAACCACAGCCACAA	117	46.5	No products	-------	-------
CallaRe140	comp430_c0	(AGA)7G(GAA)8	GGTTCTCTCTCCAAGTTCT	GGAAGAGAAGAAGGAGGAGA	235	49.6	No products	dtdp-glucose 4-6-dehydratase, putative	Ricinus communis
CallaRe141	comp4502_c0	(GCT)7----(GTG)5	CATGATTCCTGGACGTGTGA	AAAGCCATCGGCAACCTCAT	128	54.7	No products	WD-repeat protein, putative	Ricinus communis
CallaRe142	comp4589_c0	(TA)10	TGGTGAGGAACCCATGGCTT	GCCGGAGTTCAACATGCACAT	221	50.1	Non-specificity	PREDICTED: RING finger and transmembrane domain-containing protein 2-like	Fragaria vesca subsp. vesca
CallaRe143	comp4709_c0	(CAT)8	CCCATCCTCTTTATCACCAT	ATTGTCCACCACCTCCAGATT	122	49.4	No products	hypothetical protein SORBIDRAFT_08g018320	Sorghum bicolor
CallaRe144	comp4768_c0	(GA)6---(CT)6	GAAGCTGGGGAAGGGTAAT	TCTTCCCTTCTCCTTCACT	167	51.2	Polymorphism	PREDICTED: calcium-dependent protein kinase 16	Vitis vinifera
CallaRe145	comp4885_c0	(GCC)7	GGAGGAAGCCAGAAGAGGAGA	ATGCCACCTCCTCCTCCCTCT	110	59.2	Non-specificity	multicopy suppressor of IRA1	Dendrobium nobile
CallaRe146	comp4915_c0	(CT)10	CTGCGCTGCTGTTTCTGGTGT	GGTCTCTCAGGAGCCCATCT	139	53.7	Polymorphism	hypothetical protein VITISV_030148	Vitis vinifera
CallaRe147	comp4971_c0	(GT)10	GGAAACATGGCGTGACCTT	GTTCAACAACCGATTCCCAGT	210	52.3	Polymorphism	hypothetical protein SORBIDRAFT_02g040400	Sorghum bicolor
CallaRe148	comp5088_c0	(GTT)8	TCCACACCCACCGTTATAGT	GTAATTGGACAGAGCACACT	162	47.4	No products	PREDICTED: flowering time control protein FCA	Vitis vinifera
CallaRe149	comp5092_c0	(CGA)8	ACCGATCCGCTCTCGCAAT	GGATGCTTGACACAACCTCT	195	52.4	Non-specificity	-------	-------
CallaRe150	comp522_c0	(AG)12	GTGCCTGACGATTCCGACT	TCTACACCATGGCCAGCACA	136	54	No products	-------	-------
CallaRe151	comp5238_c0	(AAAG)5	GTCCTTGACCTGTGATTTCT	TCCTTCTTTGCTTGACTCA	209	48.4	Polymorphism	unnamed protein product	Vitis vinifera
CallaRe152	comp5318_c0	(AT)10	TATCAGGATGGTGCCAACT	GTTCAGTGCTTTGTAGGGAT	166	46.4	No products	PREDICTED: uncharacterized protein LOC100254008	Vitis vinifera
CallaRe153	comp5330_c0	(TG)12	CATGGTGAGTTGCATCGATT	TCACCGGTTAGCAATGGCAA	198	51	No products	predicted protein	Populus trichocarpa
CallaRe154	comp5340_c0	(CT)11---(CTT)7	TGGGTACGATCTCGAGTGA	ACCCTCGTAAAAGAGTCGCT	326	55	No products	PREDICTED: probable calcium-binding protein CML35-like	Setaria italica
CallaRe155	comp5364_c0	(CCG)7	CAGGAAGGAGAAGGAGGAT	GACAAAGCCAGCACCAGTT	140	57.8	Polymorphism	structural constituent of ribosome	Zea mays
CallaRe156	comp5463_c0	(CAG)7	ACTGGAAAGAGAAGGCGGTGT	AGAAGCAGAGTTTGAGGCA	157	52.3	Polymorphism	PREDICTED: rhodanese-like domain-containing protein 14, chloroplastic-like	Cucumis sativus
CallaRe157	comp5515_c0	(GCC)7	CCCTATCATGGCTCCAGTCA	AGGCAGTTGAGGGAGACCAC	210	60	No products	hypothetical protein OsI_09809	Oryza sativa Indica Group
CallaRe158	comp5577_c0	(GA)10	CAATGATGCGGGACCTCTT	CGCGTCCATCTTCGCTACT	168	57.3	No products	Asparagine synthetase 3 isoform 3	Theobroma cacao
CallaRe159	comp5660_c0	(AGG)7	TAGGCGAACTCGGACAGGGT	GCCACCGTCAACCATGCAT	234	62.2	No products	PREDICTED: lipoyl synthase, mitochondrial-like	Setaria italica
CallaRe160	comp567_c0	(TCTT)5	GGCTTCACTCCCTGATTCA	GATGCTTAGGAAGAACGTGT	219	47.9	Polymorphism	PREDICTED: uncharacterized protein LOC100246735	Vitis vinifera
CallaRe161	comp5818_c0	(CCT)7	TTGCTGACGCTTCTAATGT	AGCTTGCGATAGCCCAGGA	189	49.1	No products	PREDICTED: cyclin-P3-1-like isoform 1	Vitis vinifera
CallaRe162	comp5945_c0	(TC)10	ATCATGCACCATTTTCCGT	CTTCTCCTGCTGCCTCCAT	201	52.7	No products	PREDICTED: calumenin-B-like	Fragaria vesca subsp. vesca
CallaRe163	comp5990_c0	(GT)11	GATGTGATCCTTGGTCGCA	CTTCTCTAGCCATTCGGTA	144	48.1	No products	Mog1/PsbP/DUF1795-like photosystem II reaction center PsbP family protein isoform 2	Theobroma cacao
CallaRe164	comp603_c0	(TC)10---(TC)9	TGCTCAGATTCGGGAGTGCCA	CCACACAACAGGAAAGGTAGA	238	53.4	No products	hypothetical protein PRUPE_ppa014138mg	Prunus persica
CallaRe165	comp609_c0	(AG)11	GCAGTGTCTCGTCCCTCTT	TGCCTCTCTAAATAGCCAA	113	47.6	Polymorphism	putative nucleic acid binding protein	Freesia refracta
CallaRe166	comp635_c0	(TC)9	GTGAAAACTGCGTTACTCT	CTGCTTTAGCTCTTGCGAT	149	51	Polymorphism	zinc-finger transcription factor	Ananas comosus
CallaRe167	comp635_c0	(TTCT)5	TCTAAAATCCGTGCCGTCTA	ATGATCCTCGACTACGGTGA	125	47.4	No products	zinc-finger transcription factor	Ananas comosus
CallaRe168	comp6397_c0	(GCC7	CCTCGCCACGTGACCAGTTT	TCAGGCGTTTGGGGCTACT	159	57.6	No products	PREDICTED: uncharacterized protein LOC101299927	Fragaria vesca subsp. vesca
CallaRe169	comp6455_c0	(TGA)7	AGATGCTCCTCTTCCACCT	GGAGGTTGGAGACTAGCTT	161	49.3	No products	PREDICTED: putative disease resistance RPP13-like protein 1-like	Vitis vinifera
CallaRe170	comp6601_c0	(AGAT)5	ACAACACACTGCCTCAAGA	CATTTAGATGGACACTTGGA	256	49.5	Polymorphism	nutrient reservoir, putative	Ricinus communis
CallaRe171	comp6671_c0	(TA)11	ATCAGGACAGCCAACAGGT	GTATTATCTGGCGGGTCTA	264	47.9	Non-specificity	PREDICTED: coiled-coil domain-containing protein 93	Vitis vinifera
CallaRe172	comp6673_c0	(TCG)7	GGGAAGGGGAGGAGAAGAA	GGAGGAGGAAGAGATGGTGAA	217	56.7	No products	PREDICTED: uncharacterized protein LOC101298347	Fragaria vesca subsp. vesca
CallaRe173	comp673_c0	(TCG)9	TGGCTGAACCAGGTACTCT	ACGACGAGGAGGGTGAAGA	143	56	No products	Os08g0484700	Oryza sativa Japonica Group
CallaRe174	comp6757_c0	(AG)6--(AG)5--(AG)6	ACACCACCAGTATGGCCTT	CGCCCATTTGAGGTTTGTT	242	54	Non-specificity	PREDICTED: 4,5-DOPA dioxygenase extradiol-like protein	Vitis vinifera
CallaRe175	comp6849_c0	(TCCT6--(TC)8	CACCTTGCCTTGCCCTGAT	AACGGAAAAGCACCCCACGCA	186	56.7	Polymorphism	predicted protein	Micromonas pusilla CCMP1545
CallaRe176	comp6883_c0	(AAAG)6	ACCGTCAACCTCCGCAACCTA	ACACTAAGGCGATGAGCGT	120	48.5	No products	PREDICTED: leucine-rich repeat-containing protein 40-like	Fragaria vesca subsp. vesca
CallaRe177	comp7015_c0	(CT)10	TTCCTCATCGCCTCCATCT	CAAGGTAGGATTCCATTCT	105	49.9	Non-specificity	------	-------
CallaRe178	comp704_c0	(AG)10	TGTTCTGGTGGAAGGAGGA	AAGGAGGCGACTTTTTGTA	166	52.6	Polymorphism	TPA: hypothetical protein ZEAMMB73_945143	Zea mays
CallaRe179	comp7273_c0	(GA)10	CCGCAGGAGAGGATGCCAAT	GGAGGCATCATCATAATCA	133	48.8	Polymorphism	PREDICTED: NADH dehydrogenase [ubiquinone] flavoprotein 1, mitochondrial-like	Vitis vinifera
CallaRe180	comp74_c0	(TA)10	TCCTGCGGTATGTATGCTT	CAATAATGTTGCGGTCTCA	234	49	Polymorphism	glycine-rich protein	Citrus unshiu
CallaRe181	comp758_c0	(AGG)8	GCTGCGGGATTCCTCTCTA	TGCTCTTGTTCGTCCACCA	125	54.4	No products	V-type ATP synthase beta chain	Medicago truncatula
CallaRe182	comp7612_c0	(TCCAGA)7	ATGAGTCCTCTTCCGTCCT	CGTGGAACAAATACCAGAAGT	160	50.4	No products	kinase, putative	Ricinus communis
CallaRe183	comp762_c0	(AG)10AT(AG)11	TTCCCTTAACCGACCAGCA	CCGACCAACCAAGCAATCT	178	52.6	Non-specificity	predicted protein	Hordeum vulgare subsp. vulgare
CallaRe184	comp772_c0	(GAG)7	AGAGATTGAGAATGGGACT	TTGCTCACAACAGAAAGGT	171	50.1	Monomorphism	Plant calmodulin-binding protein-related, putative isoform 1	Theobroma cacao
CallaRe185	comp7773_c0	(TAT)8	GTTGTGACGTGGTCGTGGCA	GGTCTGTTCTTTGGCTGTT	255	49.4	Polymorphism	hypothetical protein PRUPE_ppa021837mg	Prunus persica
CallaRe186	comp818_c0	(AT)10	CGTCTTACCCCATCGCCTA	AGTGACACACACATACAGT	219	46.7	No products	-------	-------
CallaRe187	comp8191_c0	(TGGTG)5	GTCCTGTTTCTGTTGGCTT	GGTTCTTCTGTTTTCGCTCT	258	53.2	Polymorphism	putative abscissic acid	Elaeis guineensis
CallaRe188	comp825_c0	(AG)10(GA)4	CTTCCCTTCTTGGTCTCCT	CCCTTAAAGATGGCGAGTT	163	52.3	No products	PREDICTED: uncharacterized protein LOC100260666	Vitis vinifera
CallaRe189	comp832_c0	(AT)10	CGCGTGTGTAGTTGGAGCT	CCTGTGCTAGTCTATTGGT	218	46.7	Polymorphism	PREDICTED: uncharacterized protein LOC101294330	Fragaria vesca subsp. vesca
CallaRe190	comp861_c1	(AGA)7	AAGGGGTAGAAAAGCCAGA	ATAGTTAATCCTCGAGCGT	110	48.3	Polymorphism	PREDICTED: probable nucleolar protein 5-2-like	Vitis vinifera
CallaRe191	comp874_c0	(GAA)7	TAGACGAGGGTGTGCGAAGT	ACTTTGCCAGGTGGATTAT	140	48.3	Polymorphism	PREDICTED: probable leucine-rich repeat receptor-like protein kinase At5g49770-like	Vitis vinifera
CallaRe192	comp874_c0	(AT)9	TTCTGTTGCTGGATGCGTT	GTTGTCTGATAGGGTGTGGT	93	46.4	No products	PREDICTED: probable leucine-rich repeat receptor-like protein kinase At5g49770-like	Vitis vinifera
CallaRe193	comp874_c0	(GA)10	GAAAGAGGCGACCTGTATT	GTTACGAGGGAACAAGCAA	184	51.7	No products	PREDICTED: probable leucine-rich repeat receptor-like protein kinase At5g49770-like	Vitis vinifera
CallaRe194	comp880_c0	(CT)8	AAGAGCAGAGAAGAGGGAT	GTGTGAAACCGAAGAGGCT	174	51.8	Polymorphism	RING/U-box superfamily protein isoform 1	Theobroma cacao
CallaRe195	comp902_c0	(GTC)5C(TCC)5	TCCTCTTCCCTGACCTCGT	GCTTCGCCTTAGCACGTAT	112	53.5	No products	Integral membrane Yip1 family protein	Theobroma cacao
CallaRe196	comp902_c0	(AT)11	ATTCAGTGCTTAGGTGGAT	GATTAGAGTAGTCGTTTGCT	164	44.3	Non-specificity	Integral membrane Yip1 family protein	Theobroma cacao
CallaRe197	comp9193_c0	(AG)10	GGCTACTTCGCAAGACGGT	TTCCCTGCTCTCTCCTTCT	137	53.2	No products	PREDICTED: potassium channel KAT3-like	Vitis vinifera
CallaRe198	comp9234_c0	(ACATC)5	GATGGCAAACGTCAAACAT	ATCTCTGAGAGGAAGAGAA	149	49.1	Polymorphism	Lactate/malate dehydrogenase family protein	Theobroma cacao
CallaRe199	comp9299_c0	(AGC)7---(GCA)5	GTCCGCAGTAAATGACAACA	TCTGCCTCCGCTGCTACTT	130	55.2	No products	PREDICTED: UDP-glycosyltransferase 73D1	Vitis vinifera
CallaRe200	comp939_c2	(TG)11	ACACTGGTATTGCCATCCT	TTCATGGAGGCACTCGTAA	186	50.9	No products	PREDICTED: uncharacterized protein LOC100257047	Vitis vinifera
